# Supplementary material
Source: PubMed Central journal article supplement (PMC4803312)

Fig. S16

Annotated high-resolution HCD spectra  
of crosslink peptides of APC/C complex

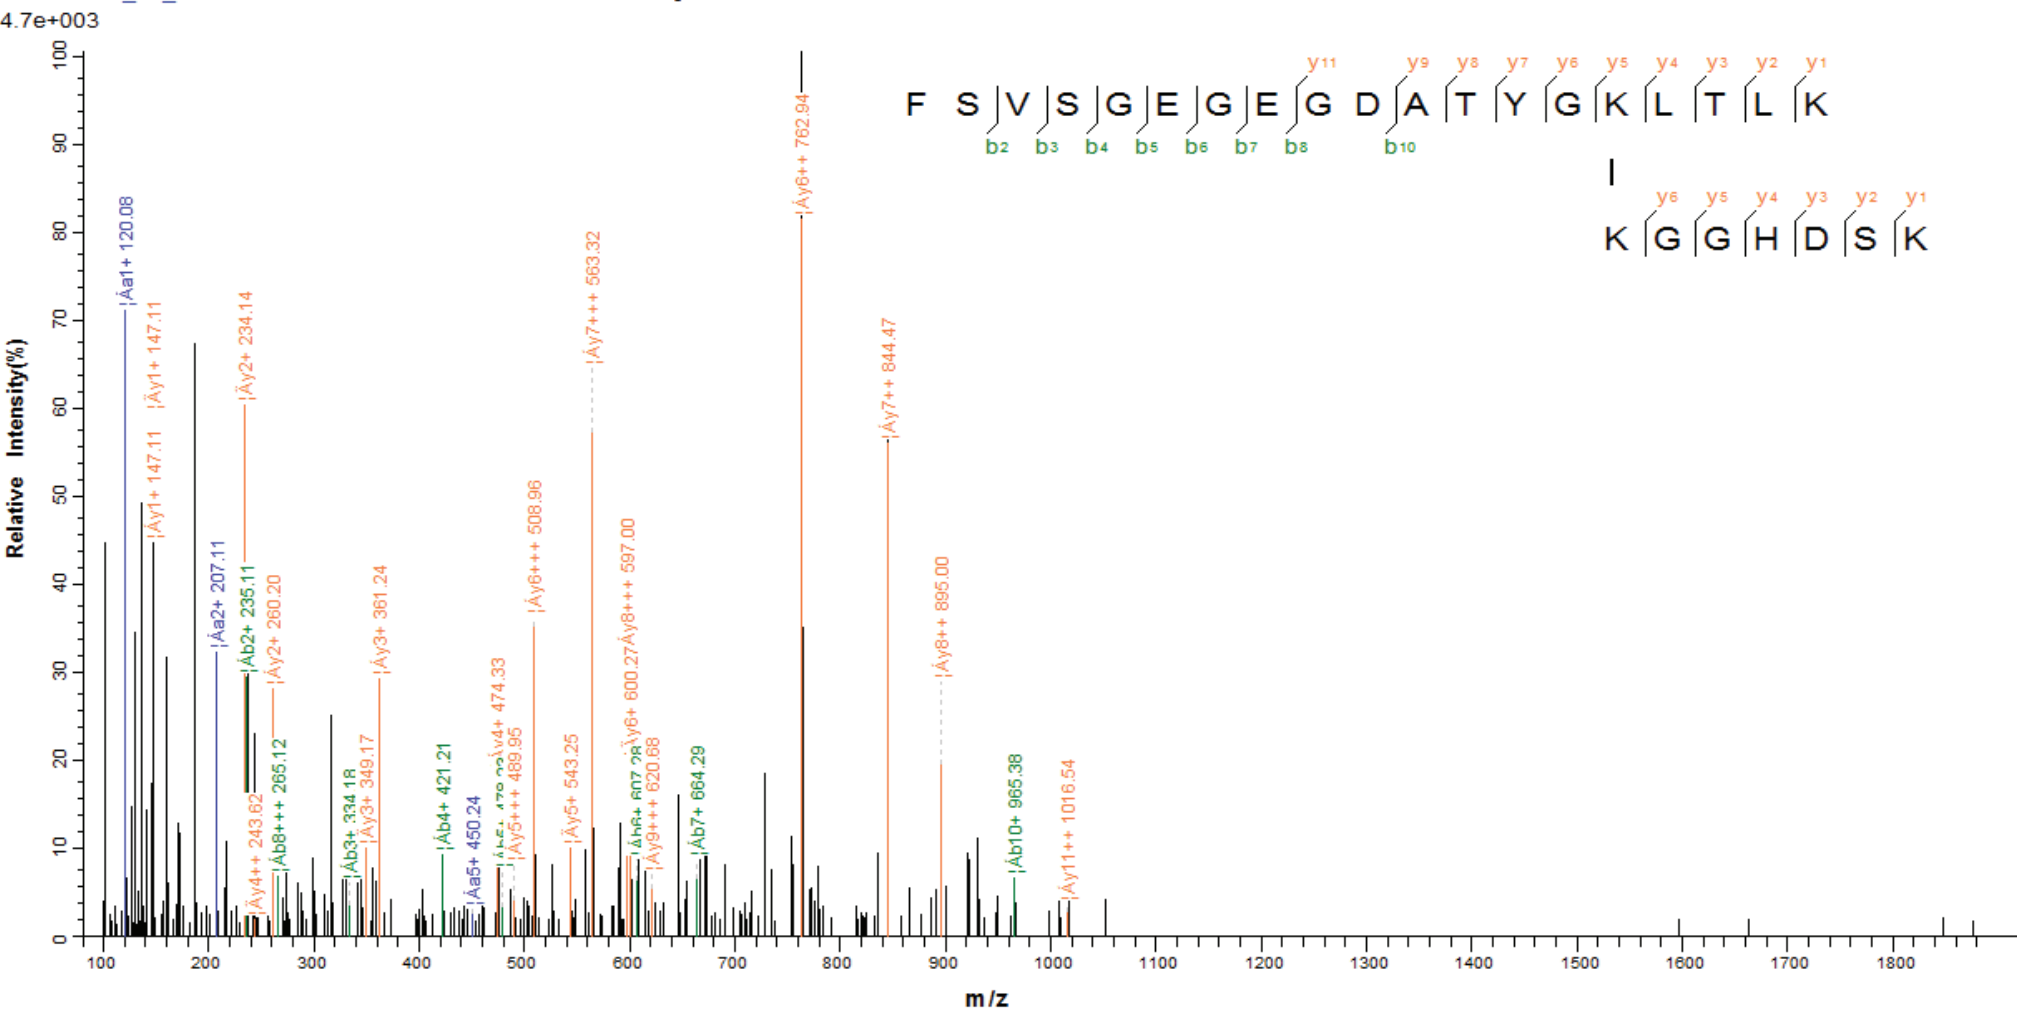

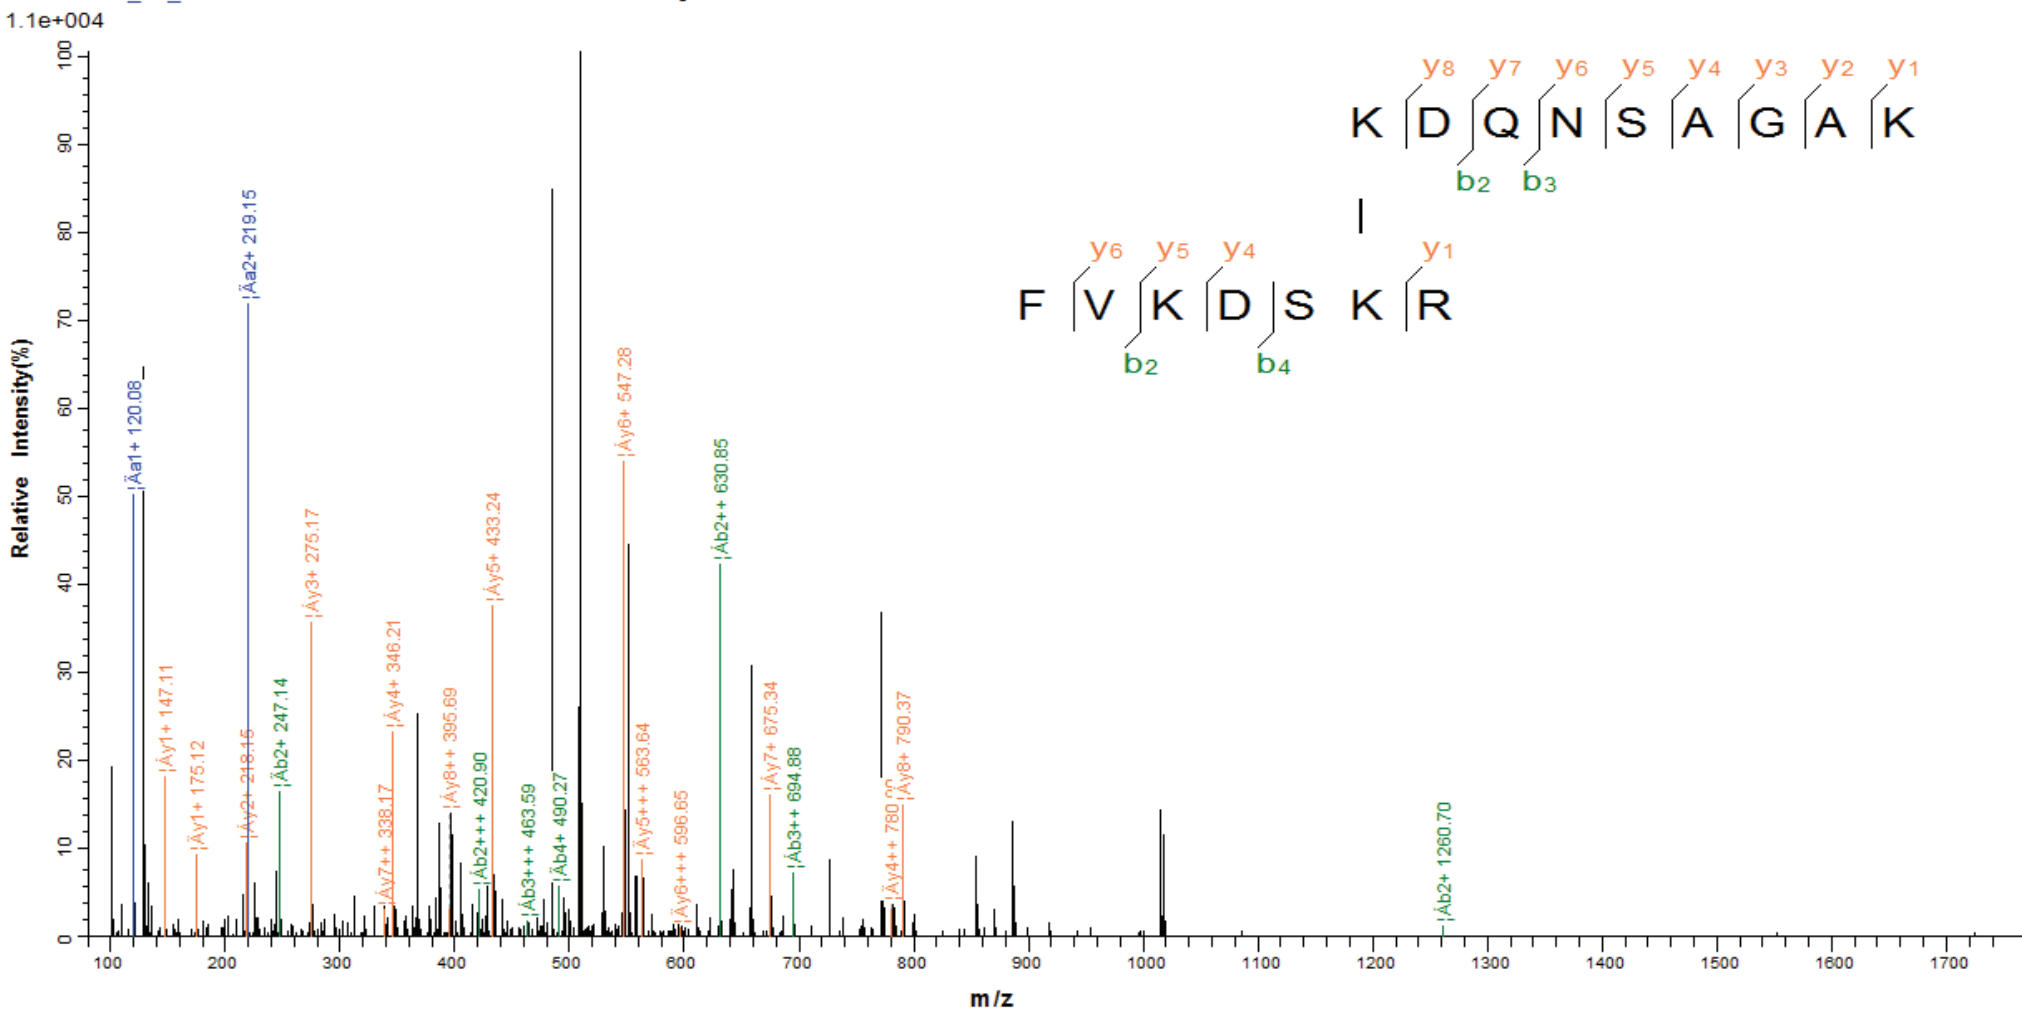

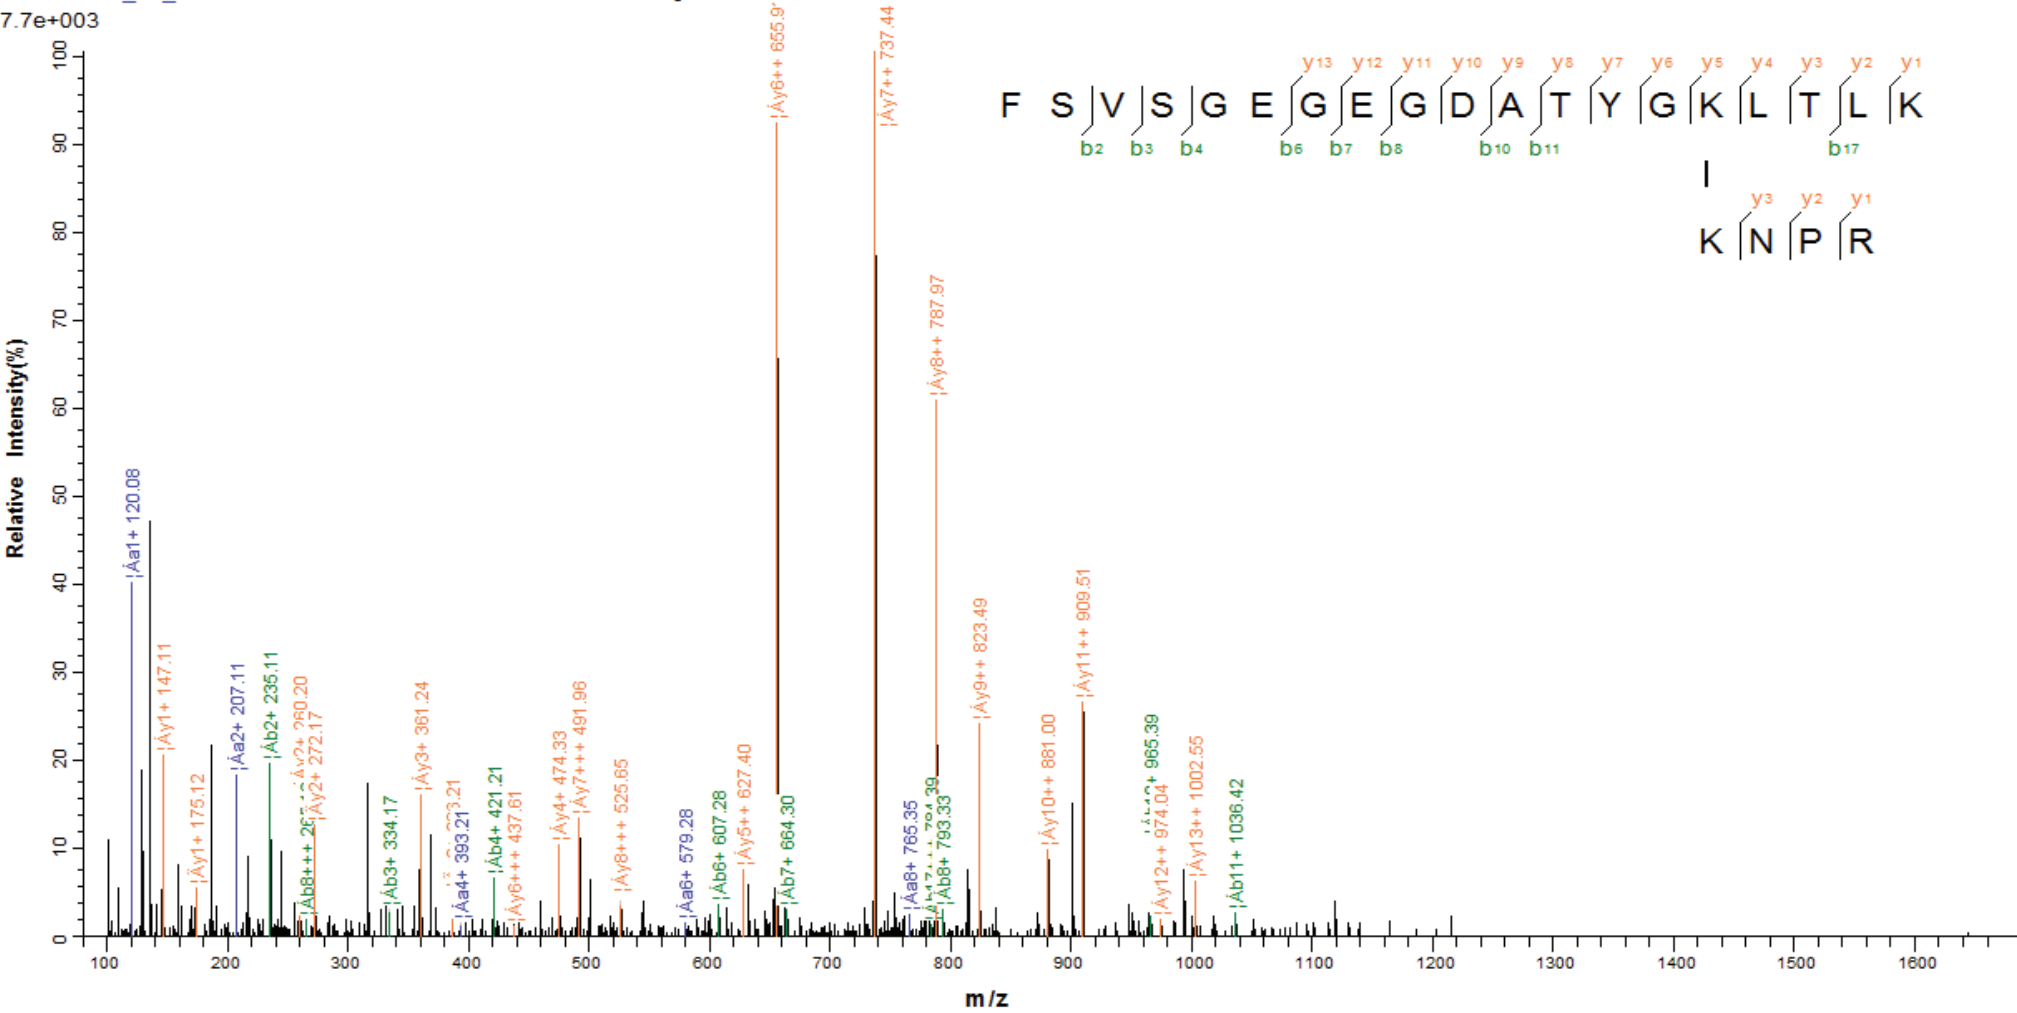

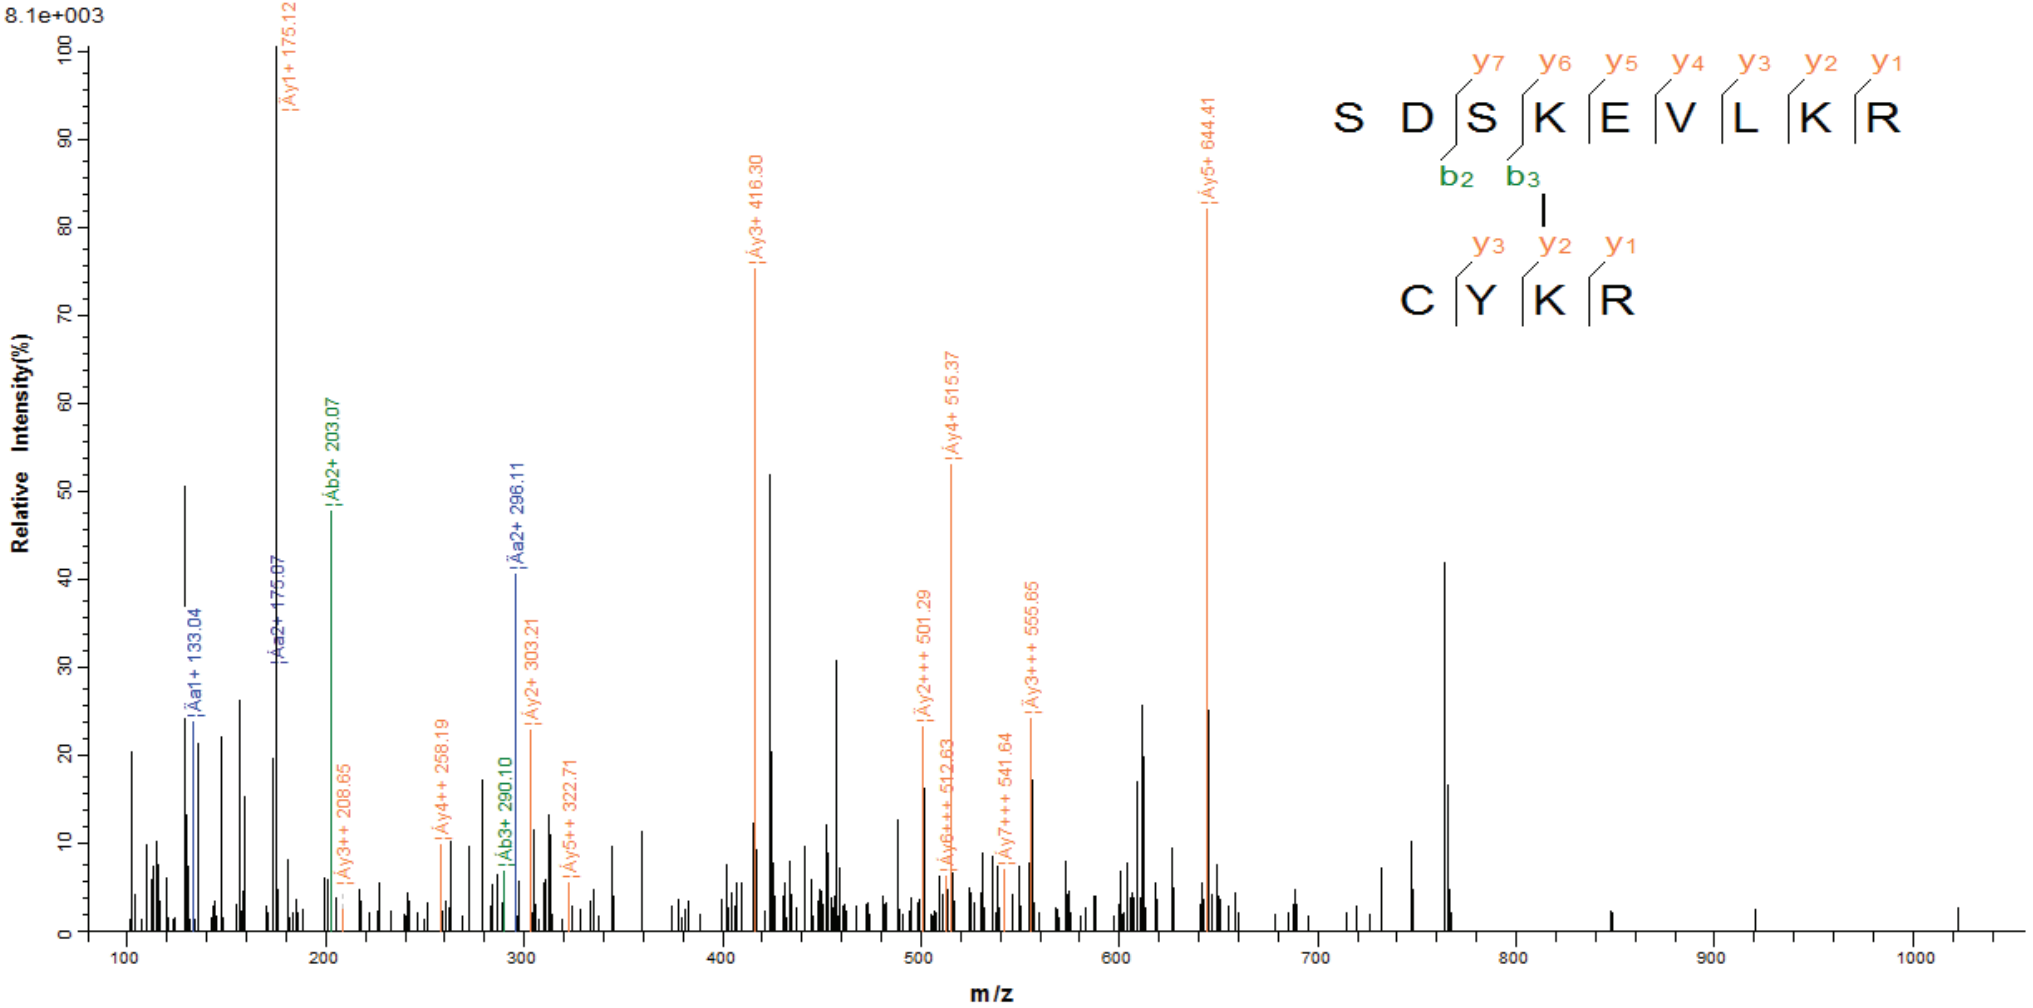

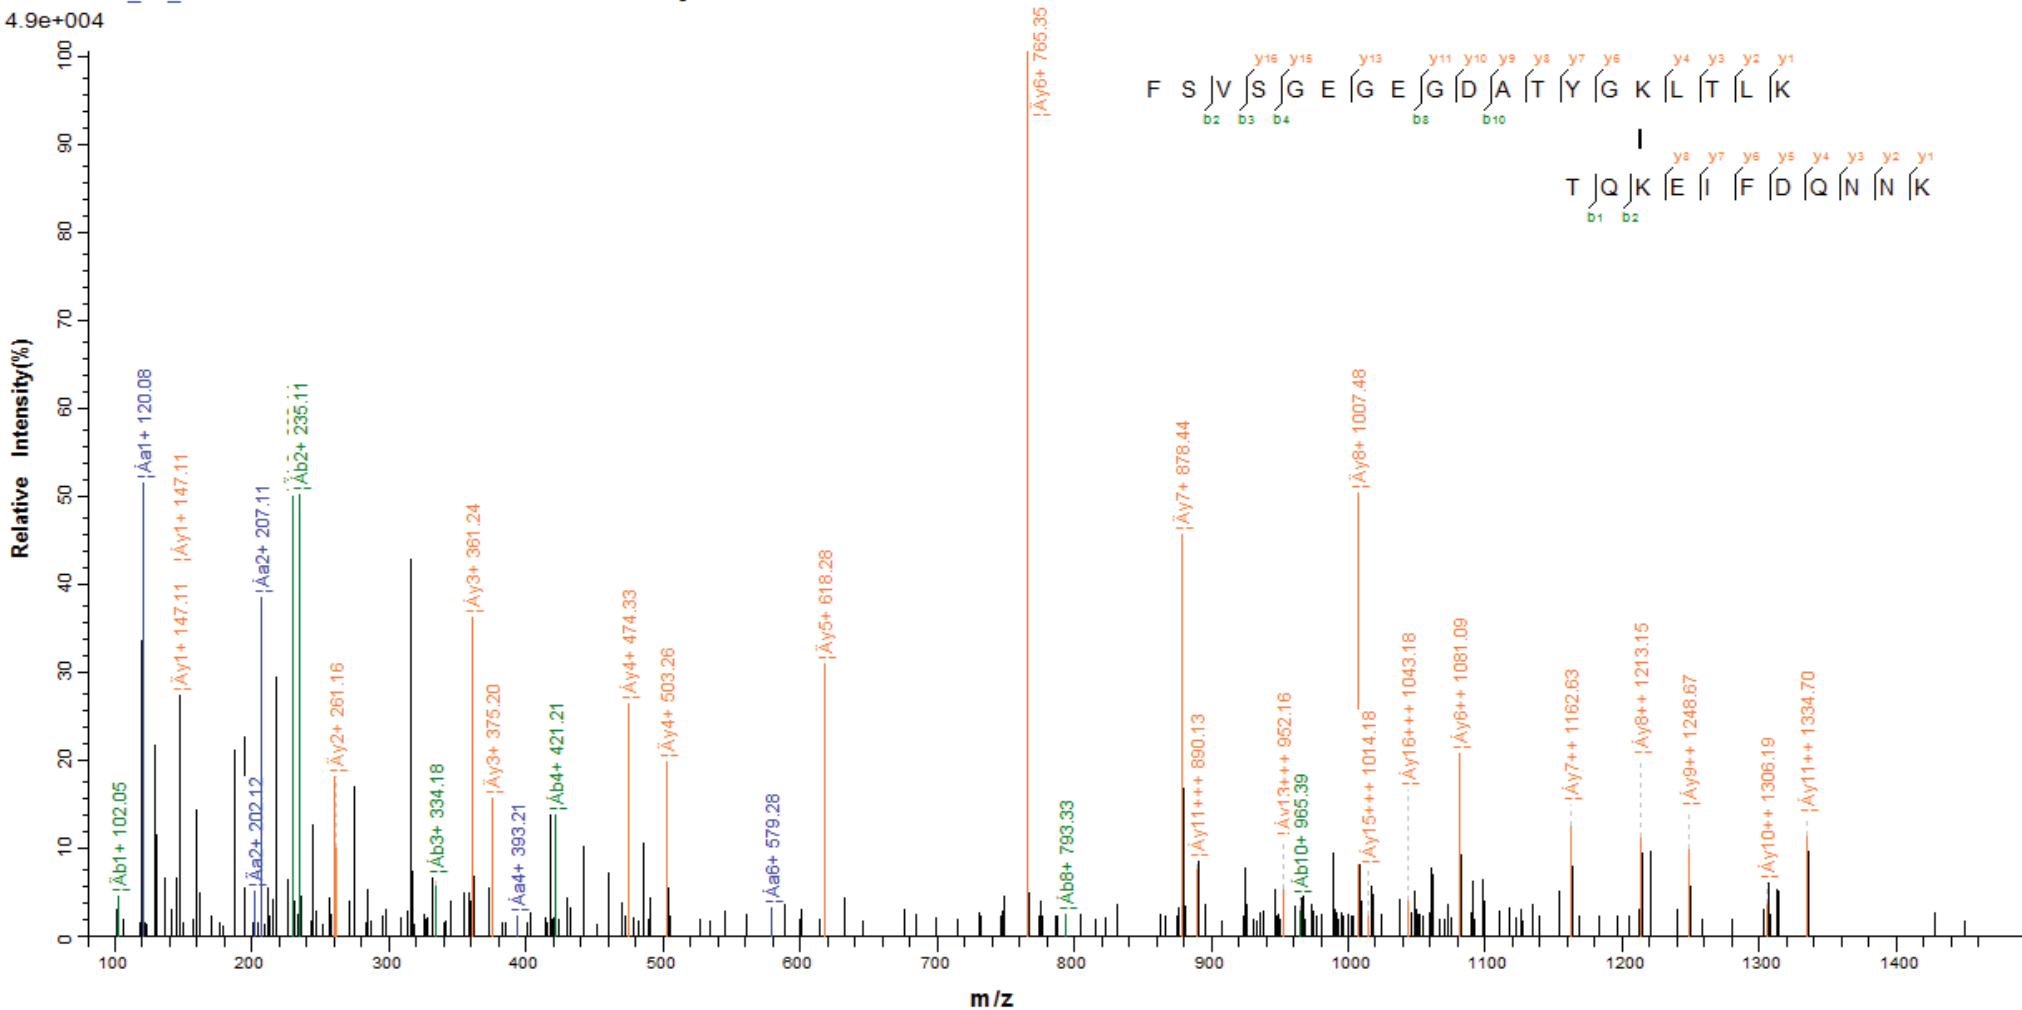

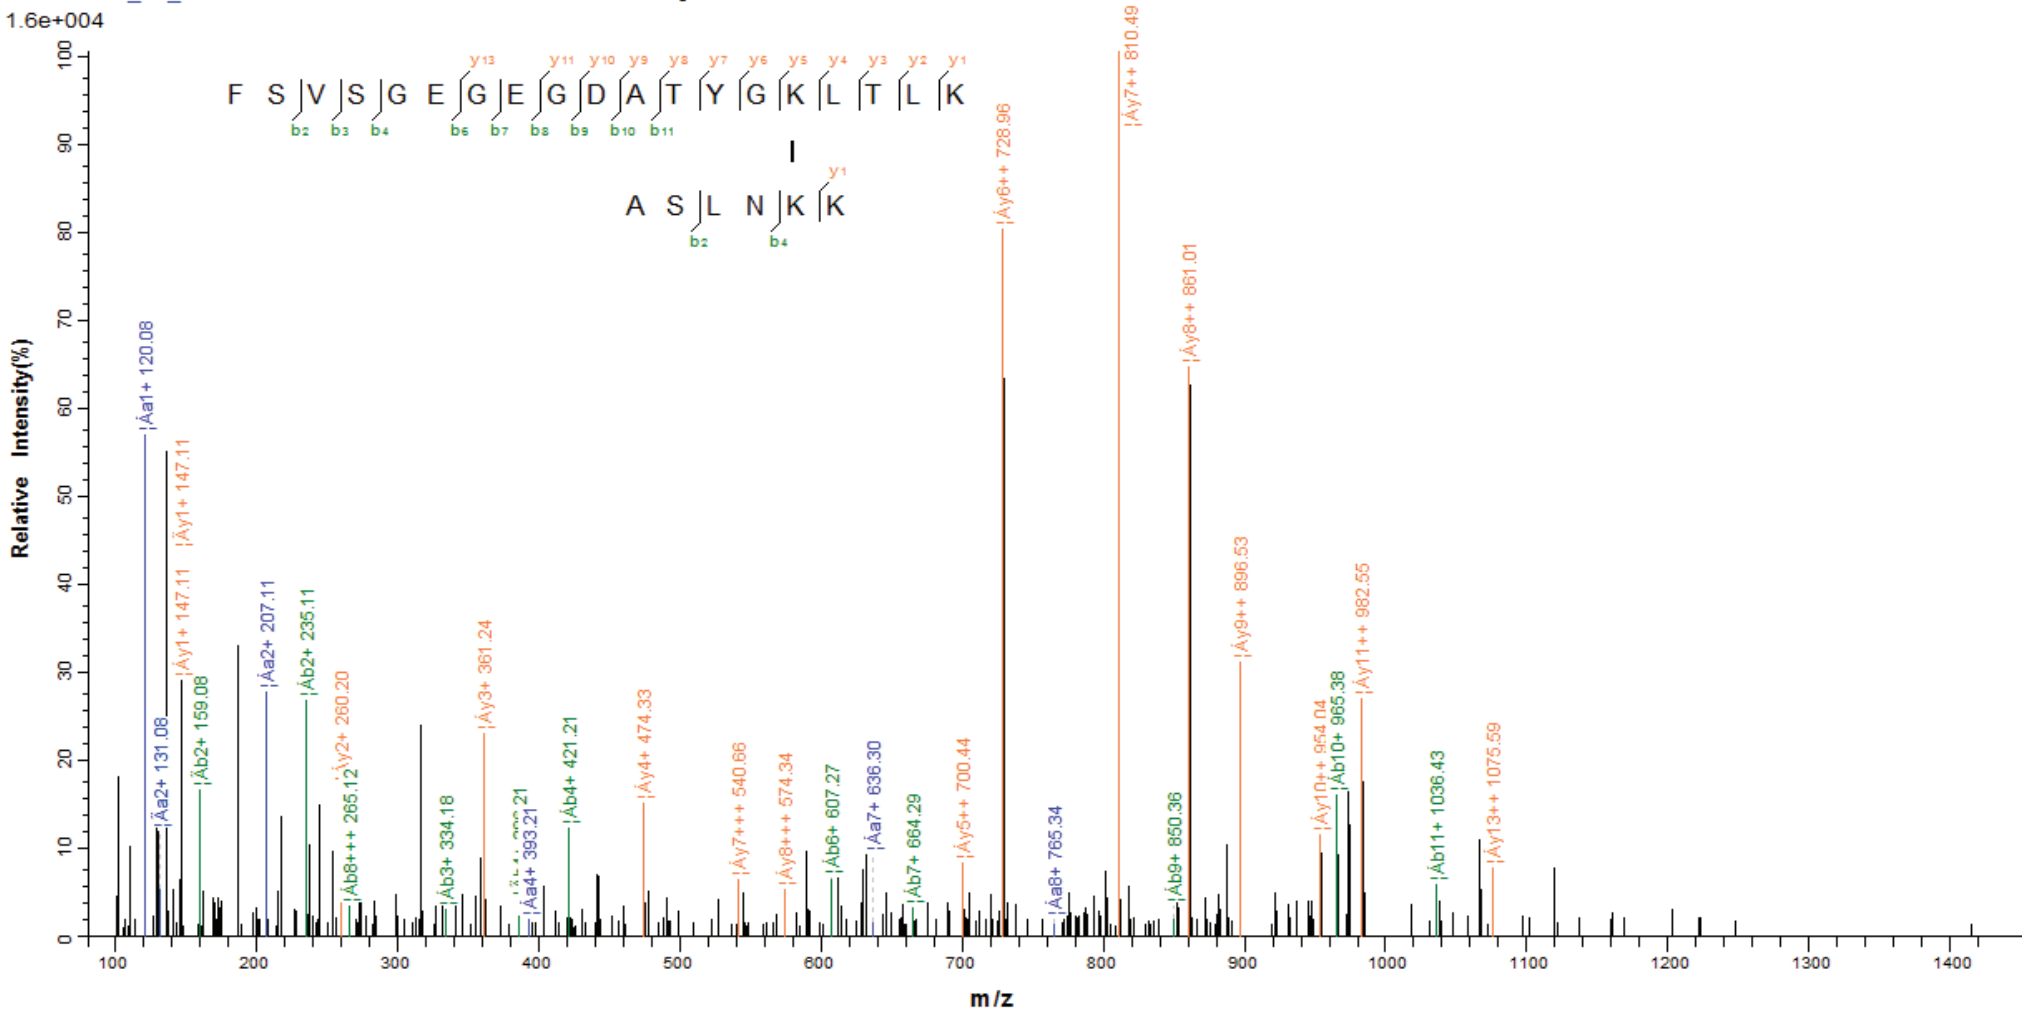

APC\_A9\_140131205754.003317.003317.4.dta

Seq: DKASLNK-LGYKEK

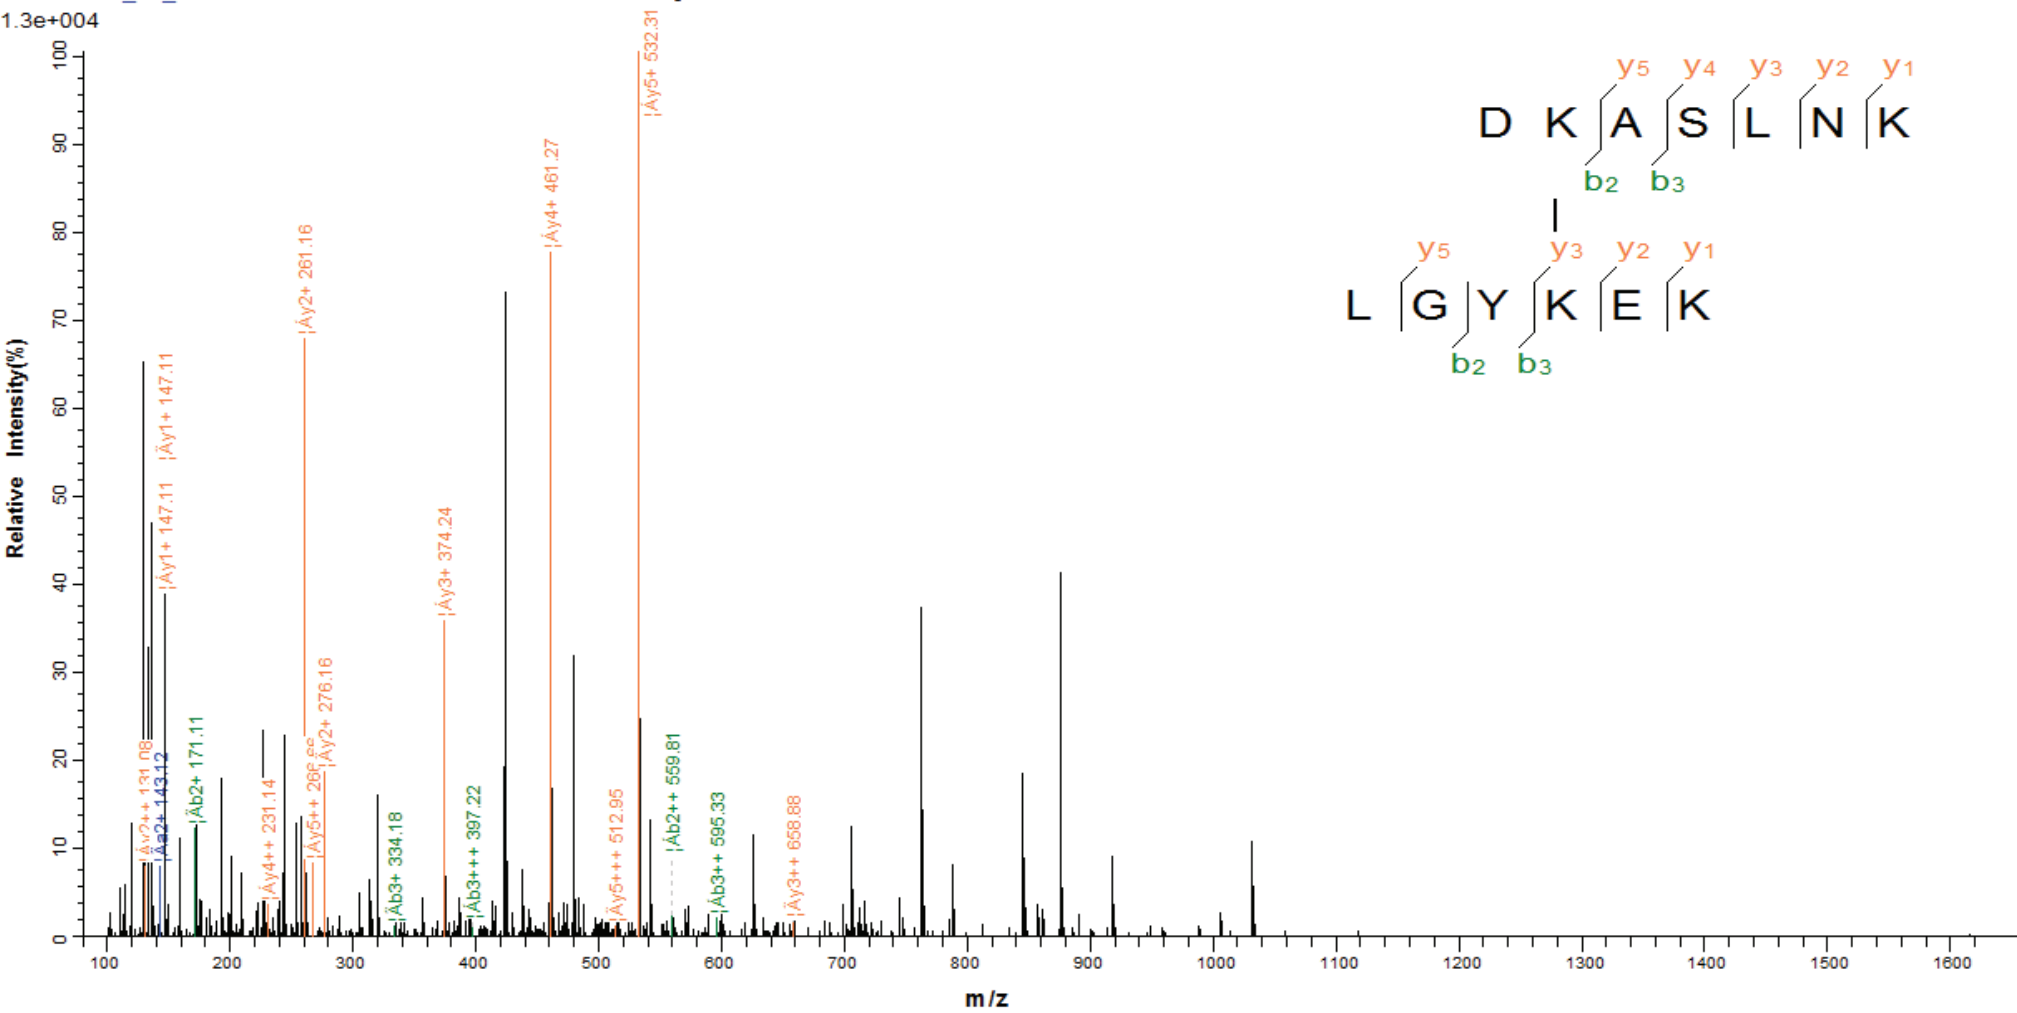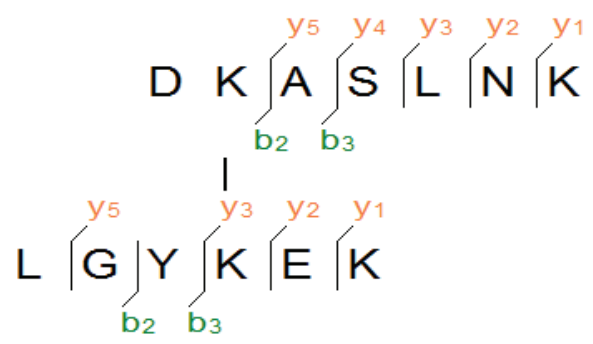



APC\_052314\_A8.2920.2920.4.dta Seq: SIKASQTVDQNTSIYYR-KGELTISSTK

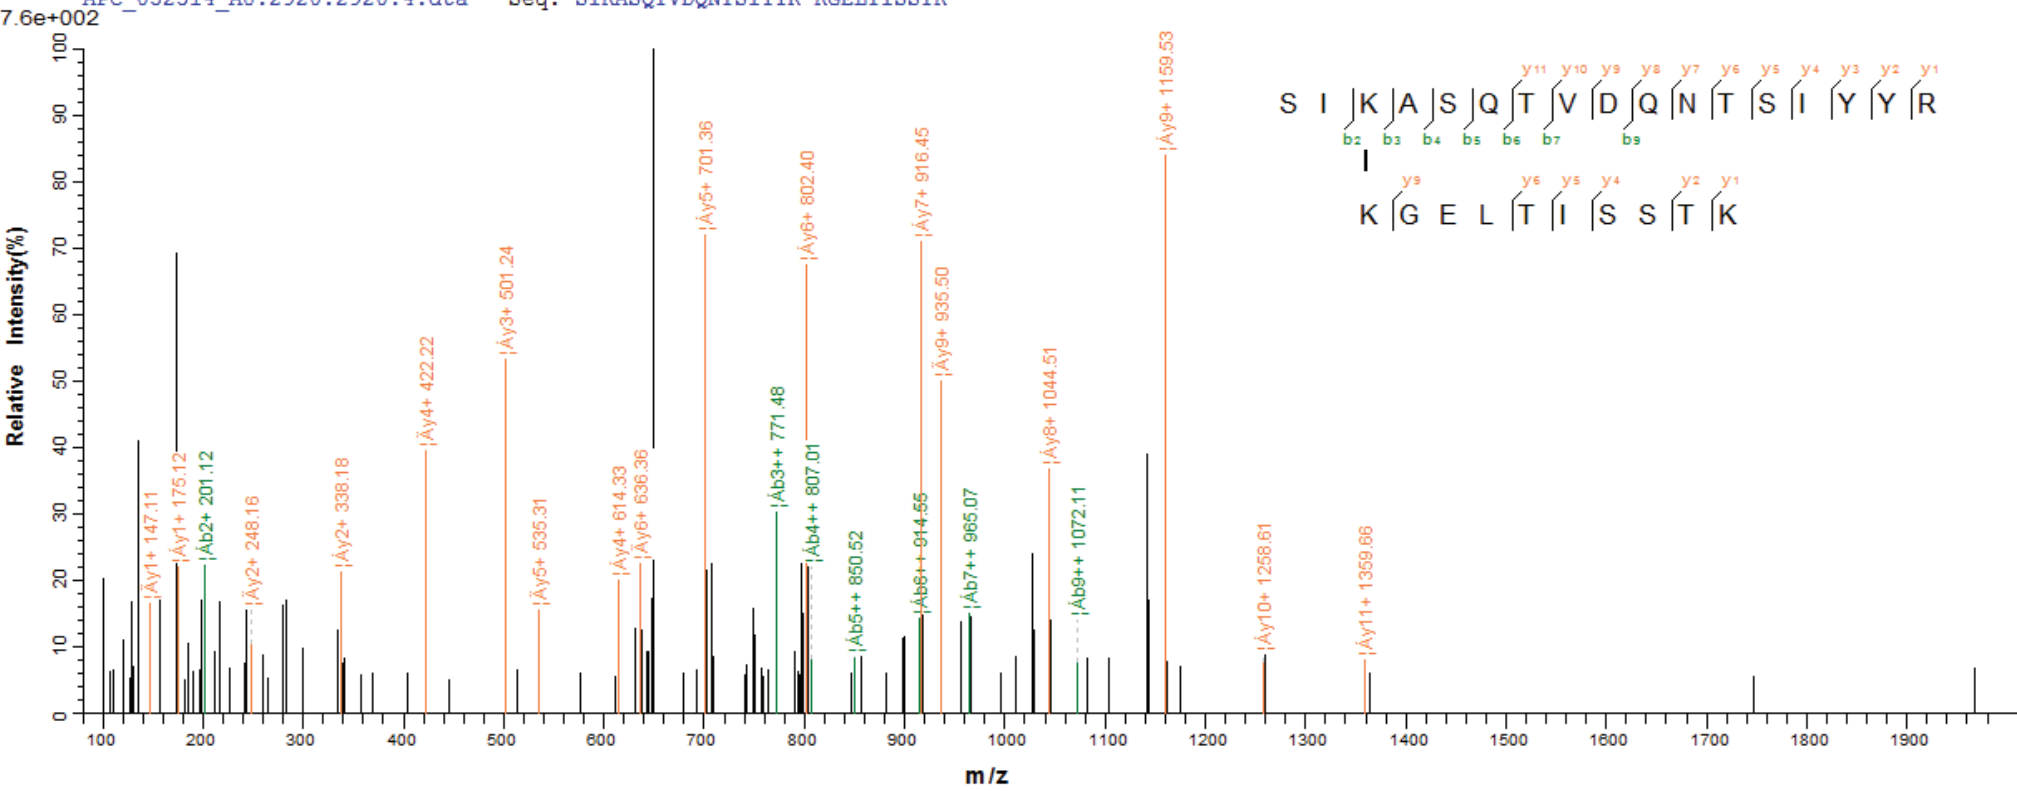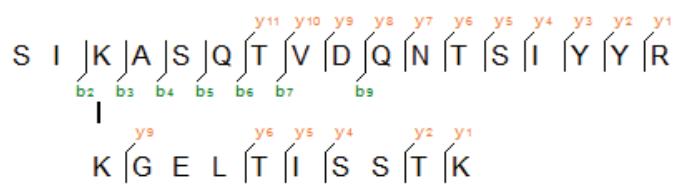

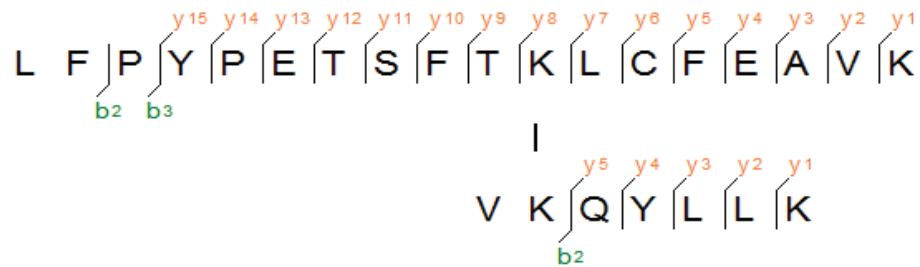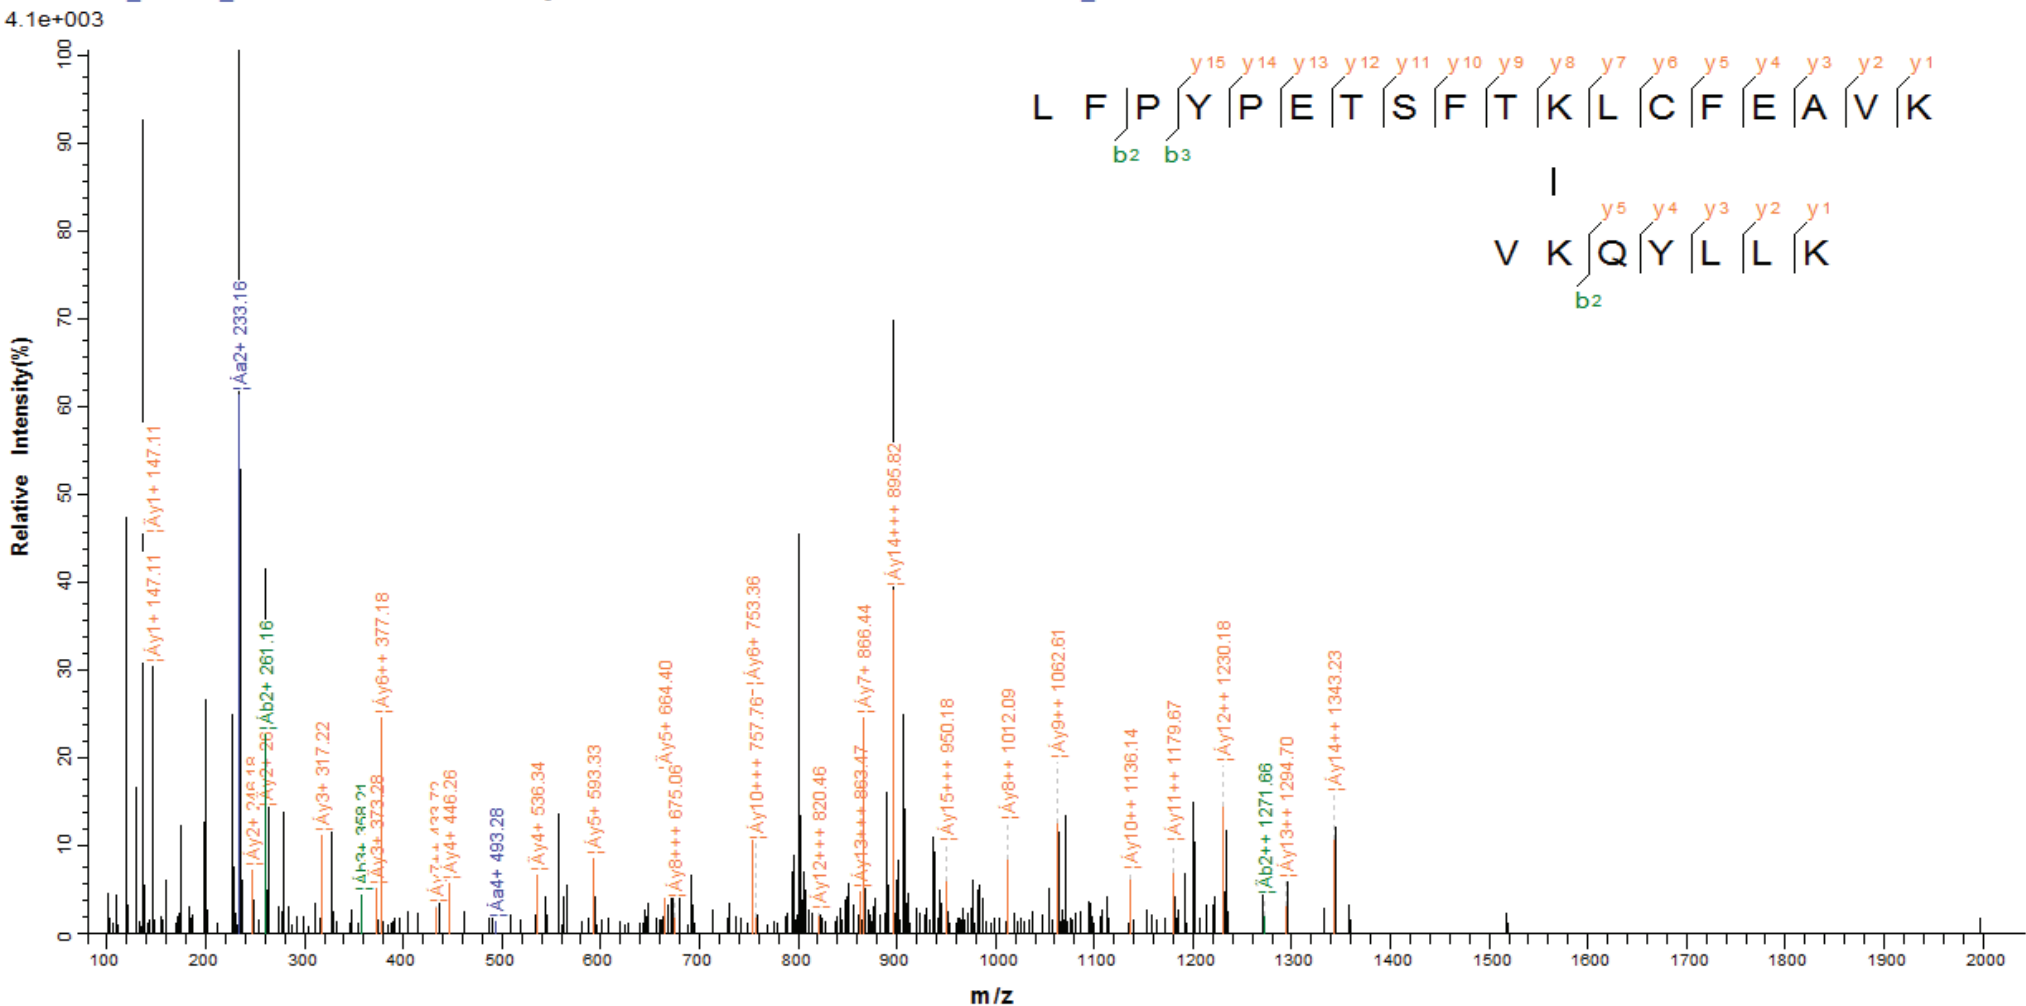

APC\_052314\_A8.3911.3911.5.dta

Seq: FDDIVKQDPYR-NKLFLSHR

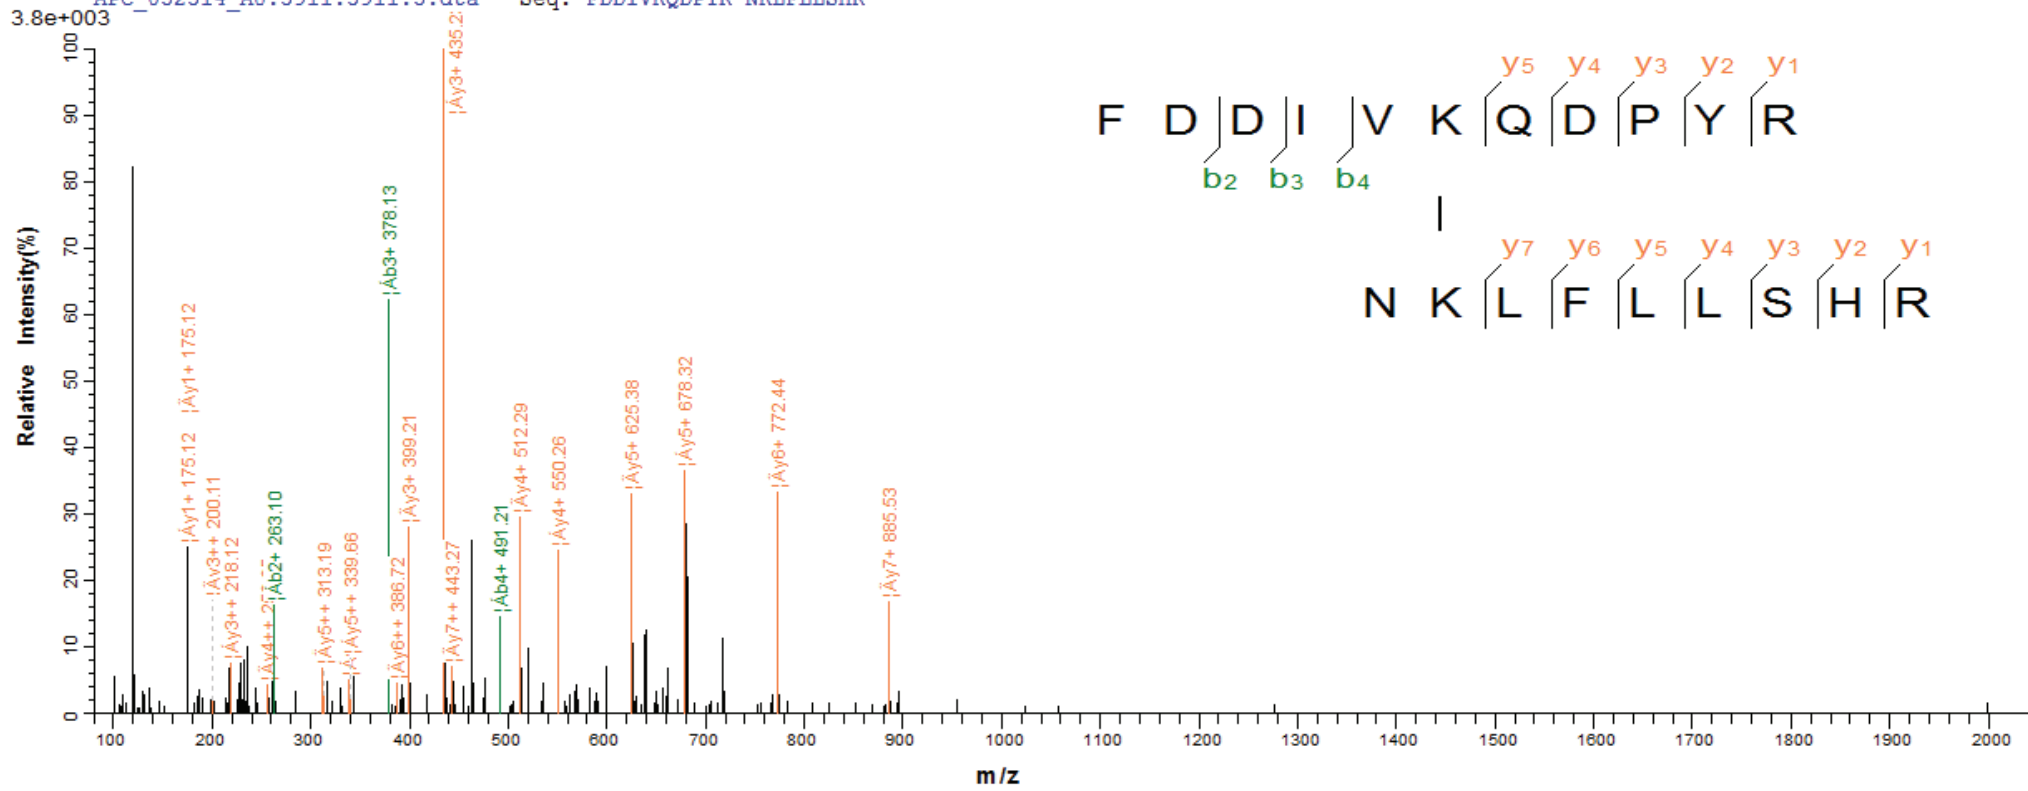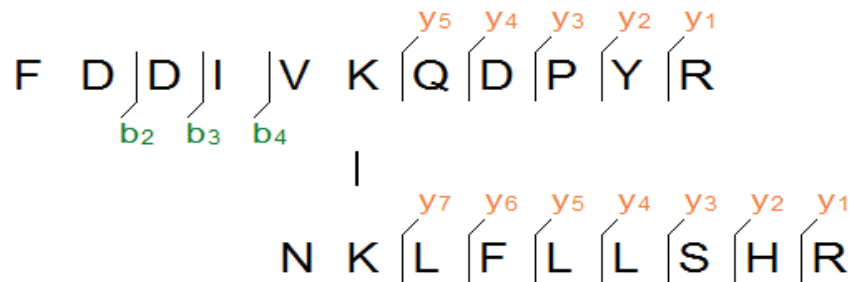

APC\_052314\_A8.5718.5718.5.dta

Seq: YLEAIKENSYQTALDSLHNYFDYK-SVKWCIEDQCLR

Mod: 32,C\_57 37,C\_57

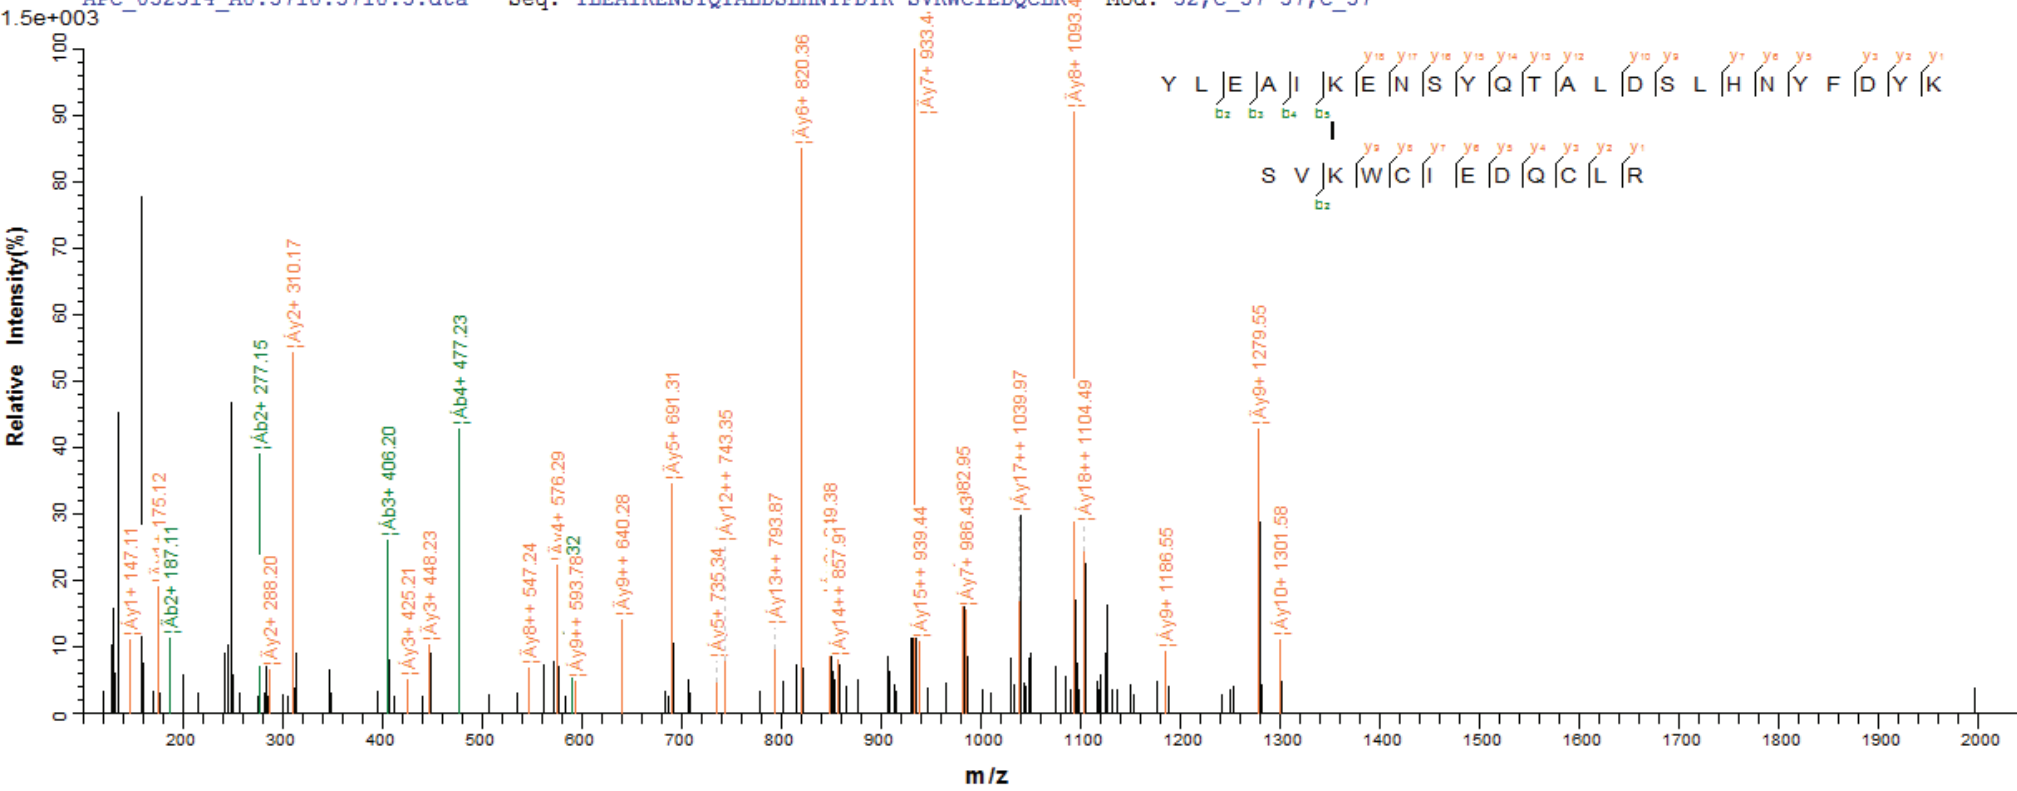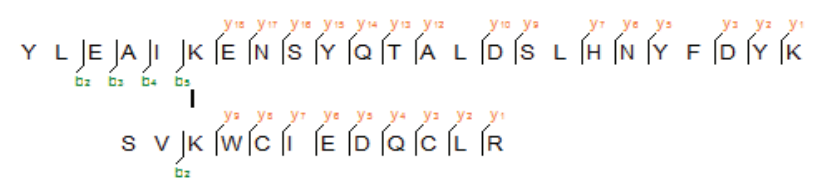

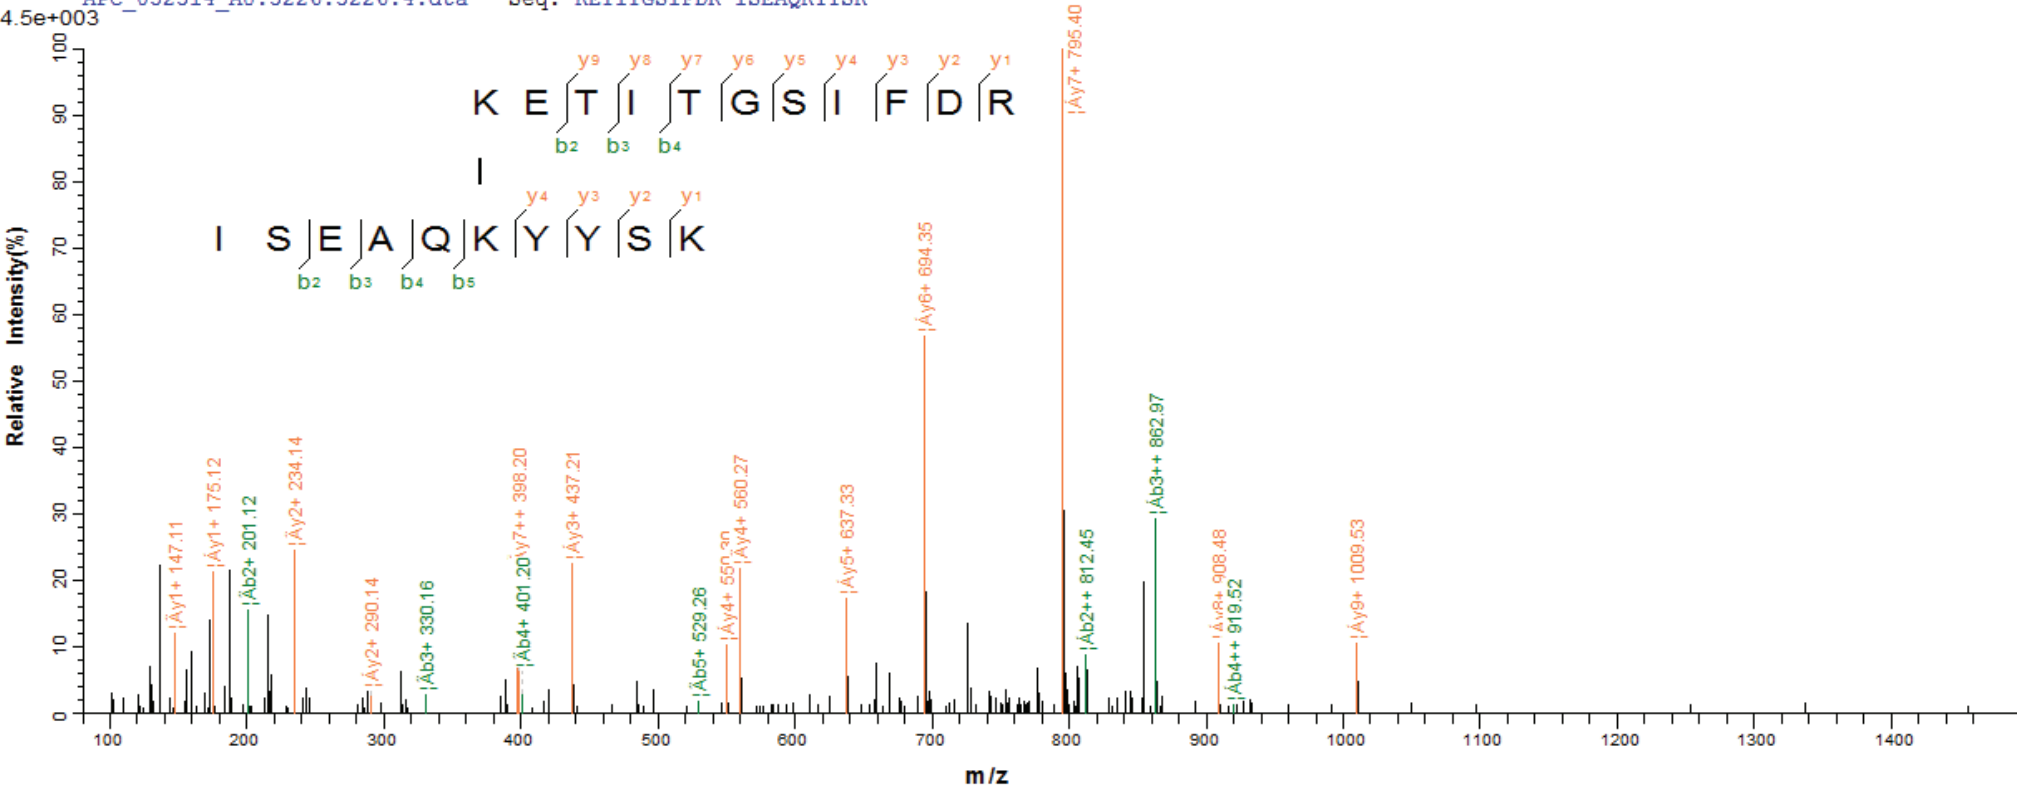

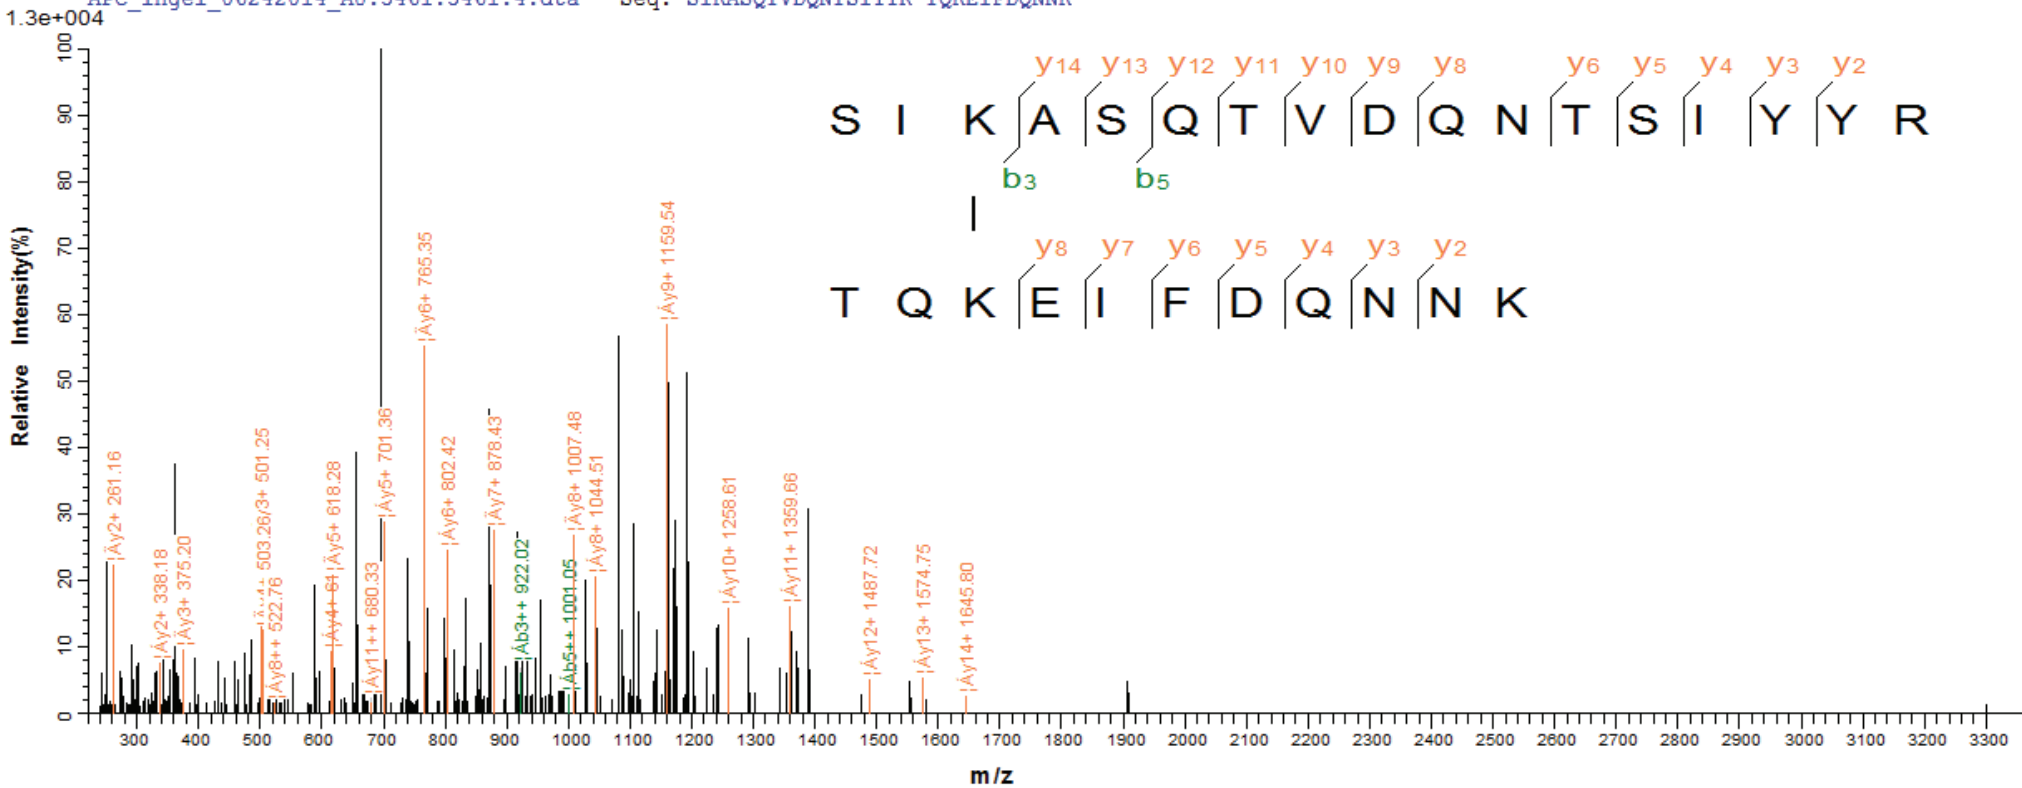

APC\_ingel\_06242014\_A8.8753.8753.5.dta

Seq: AGYIDFEKTPDCFVVVLSIDIAHVYMLK-SIKASQTVDQNTSIYYR

Mod: 12,C\_57

Score: 8.60e-023

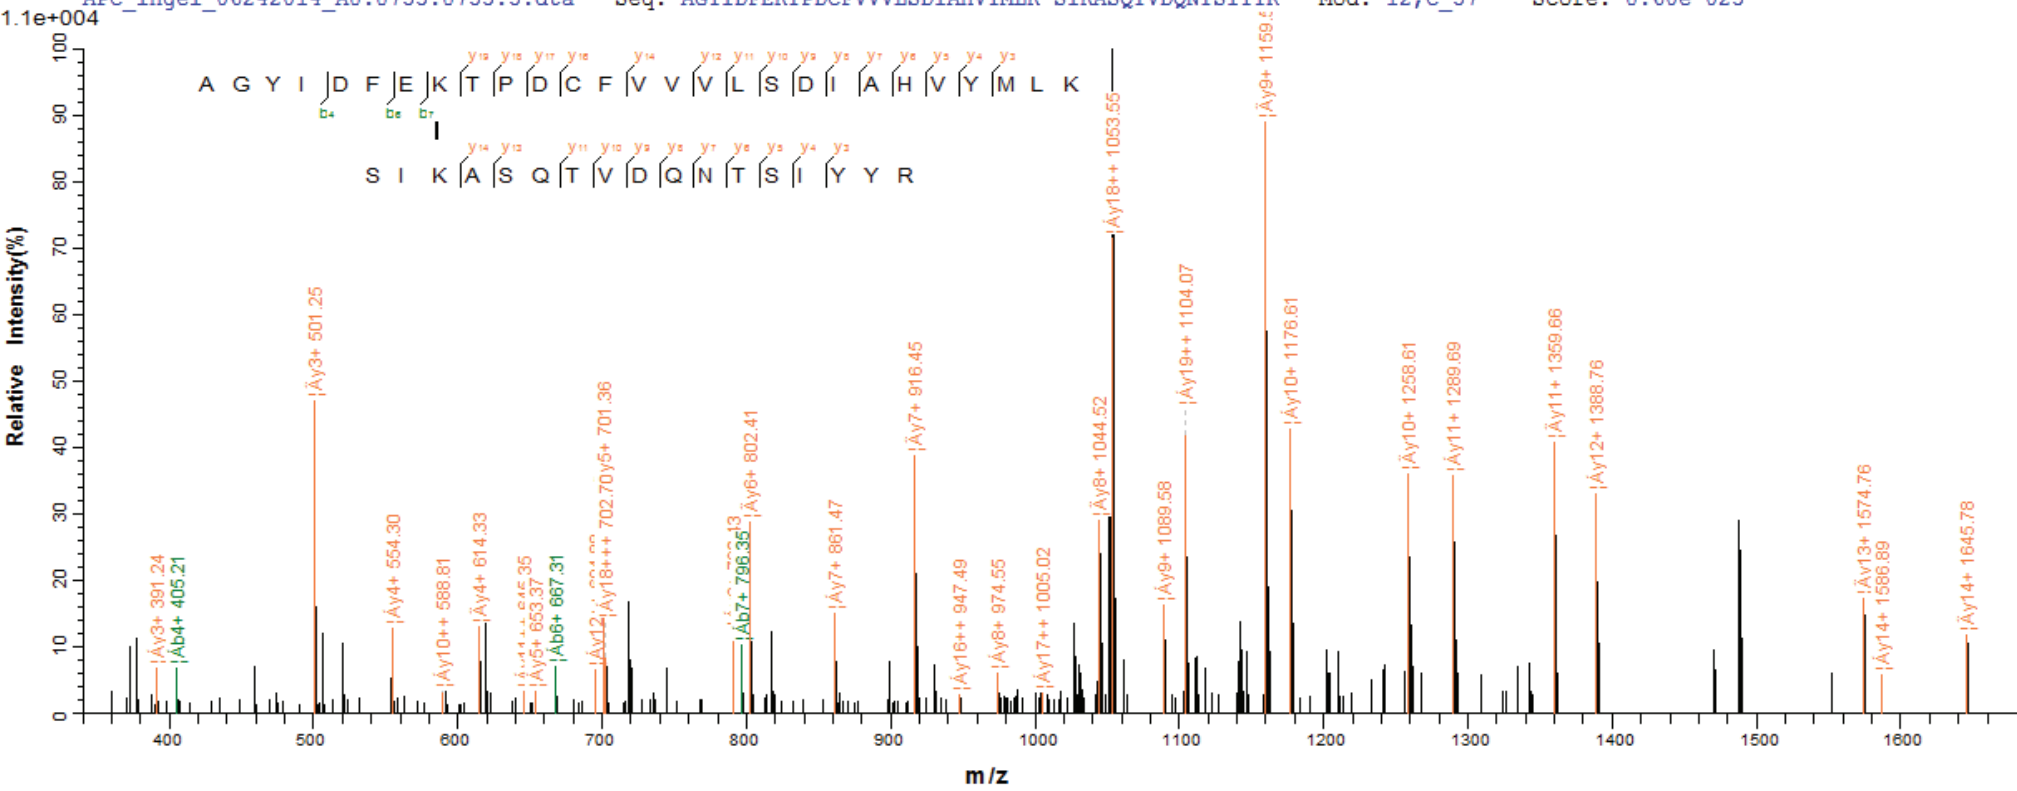

APC\_ingel\_06242014\_A9.5060.5060.4.dta Seq: FNKANFNFTTPLR-KVSLQR Score: 1.03e-007

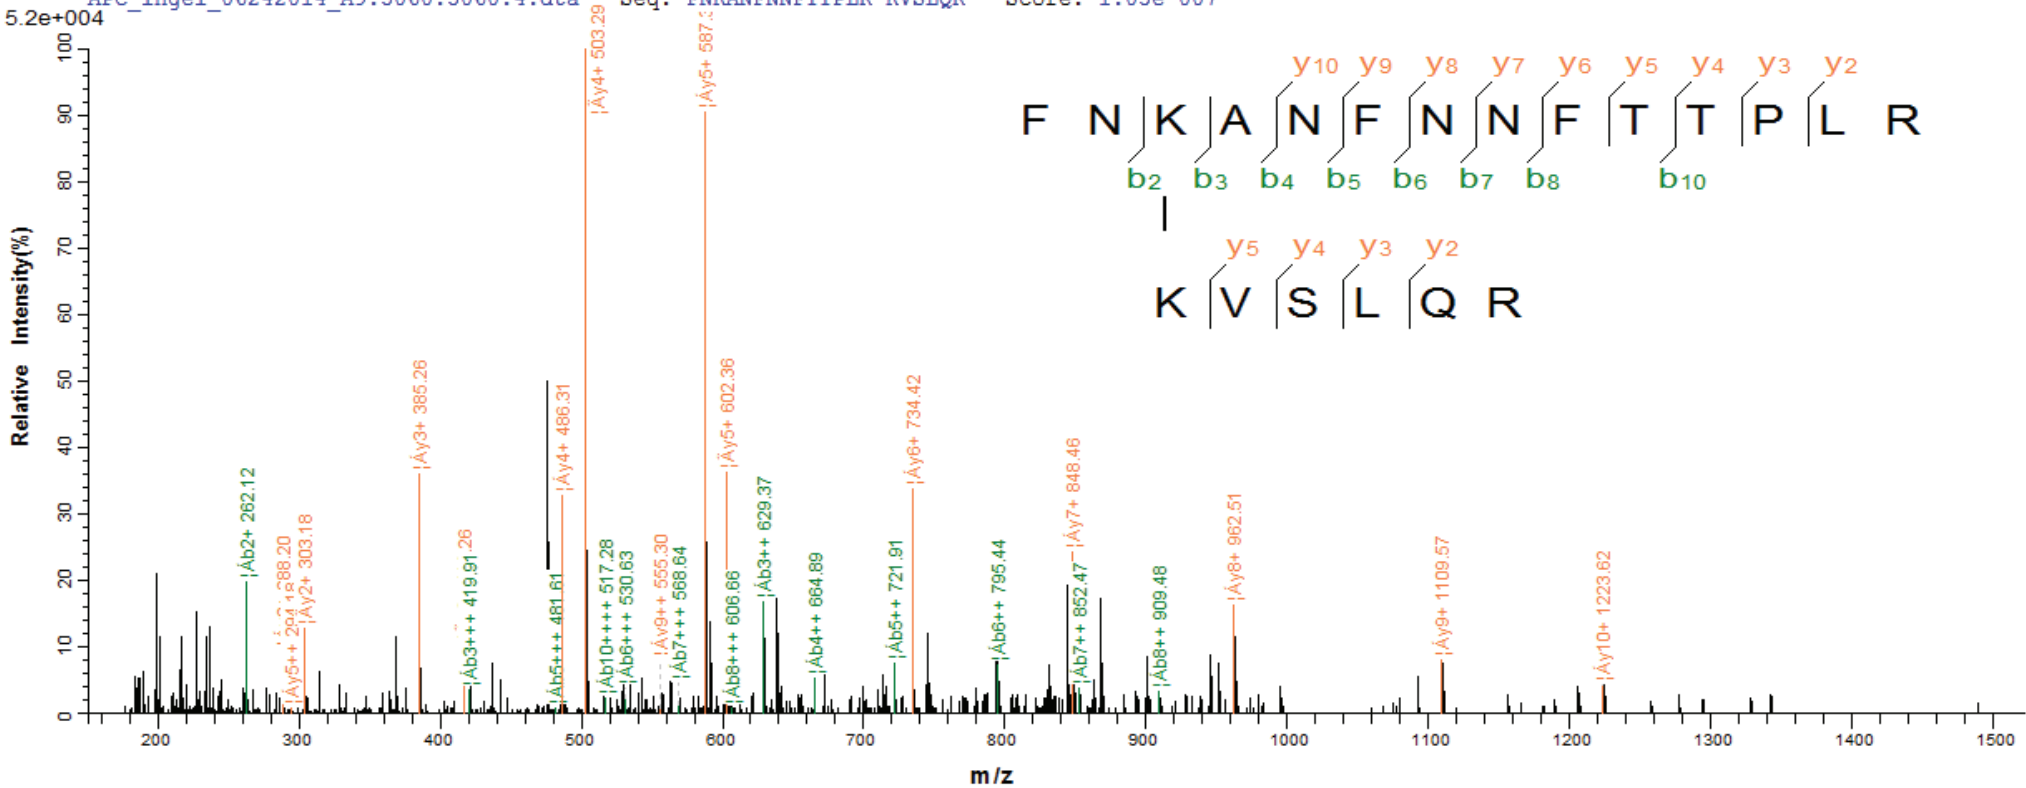



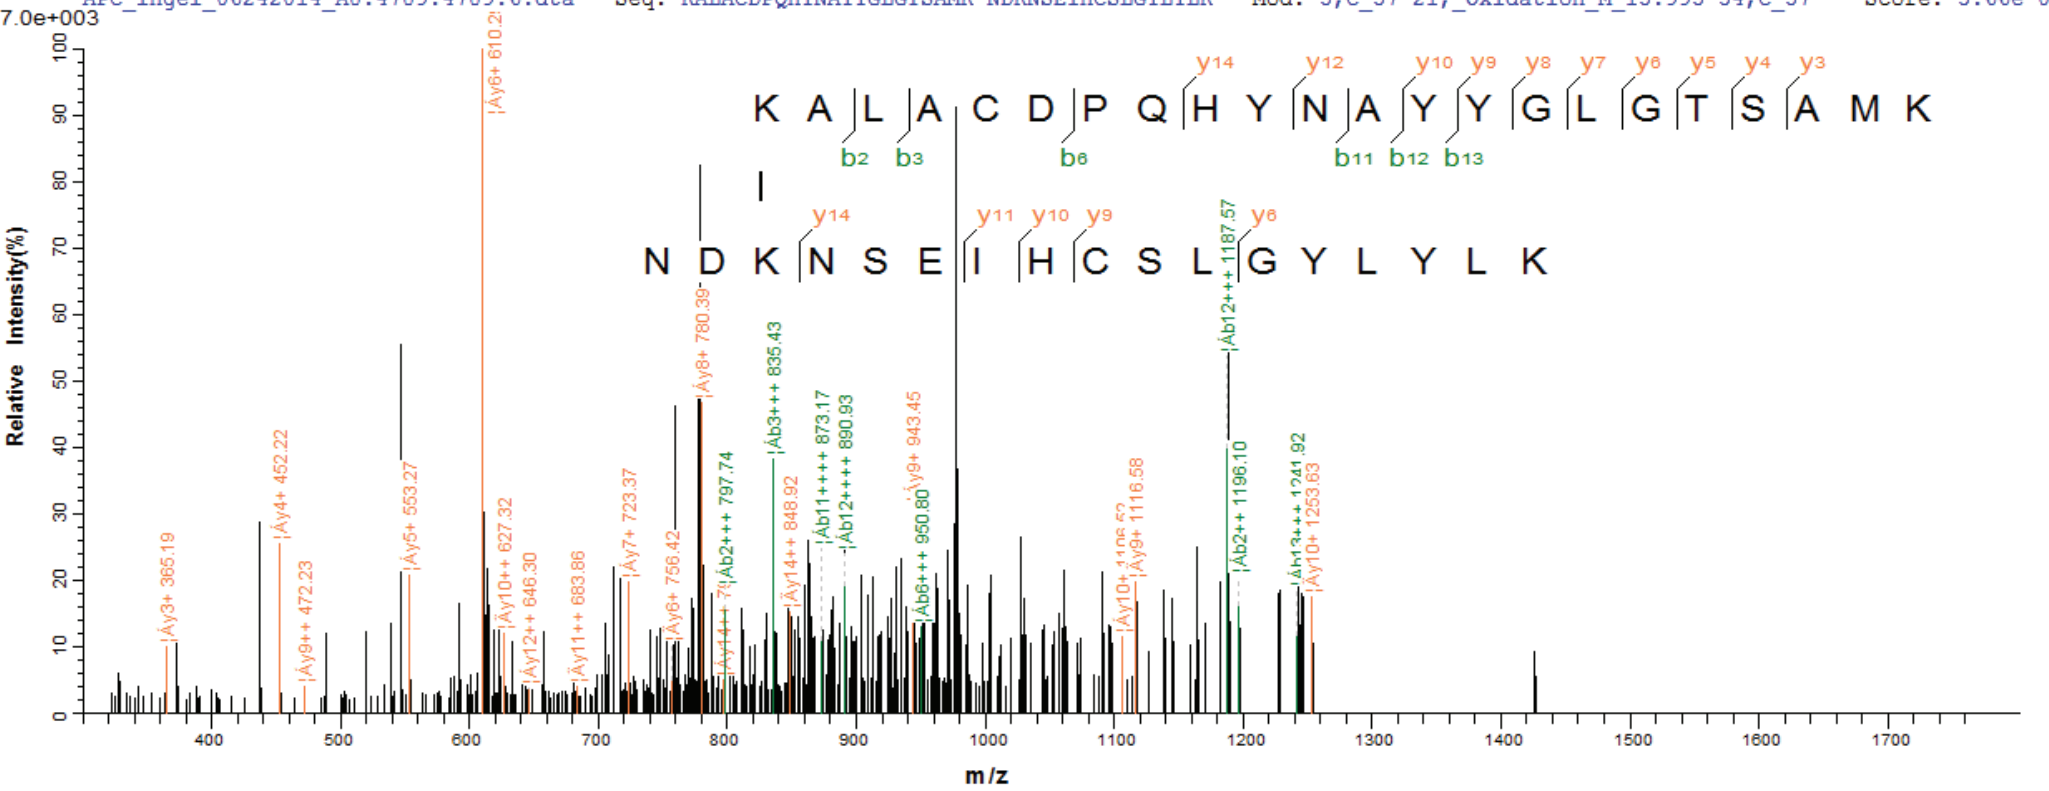

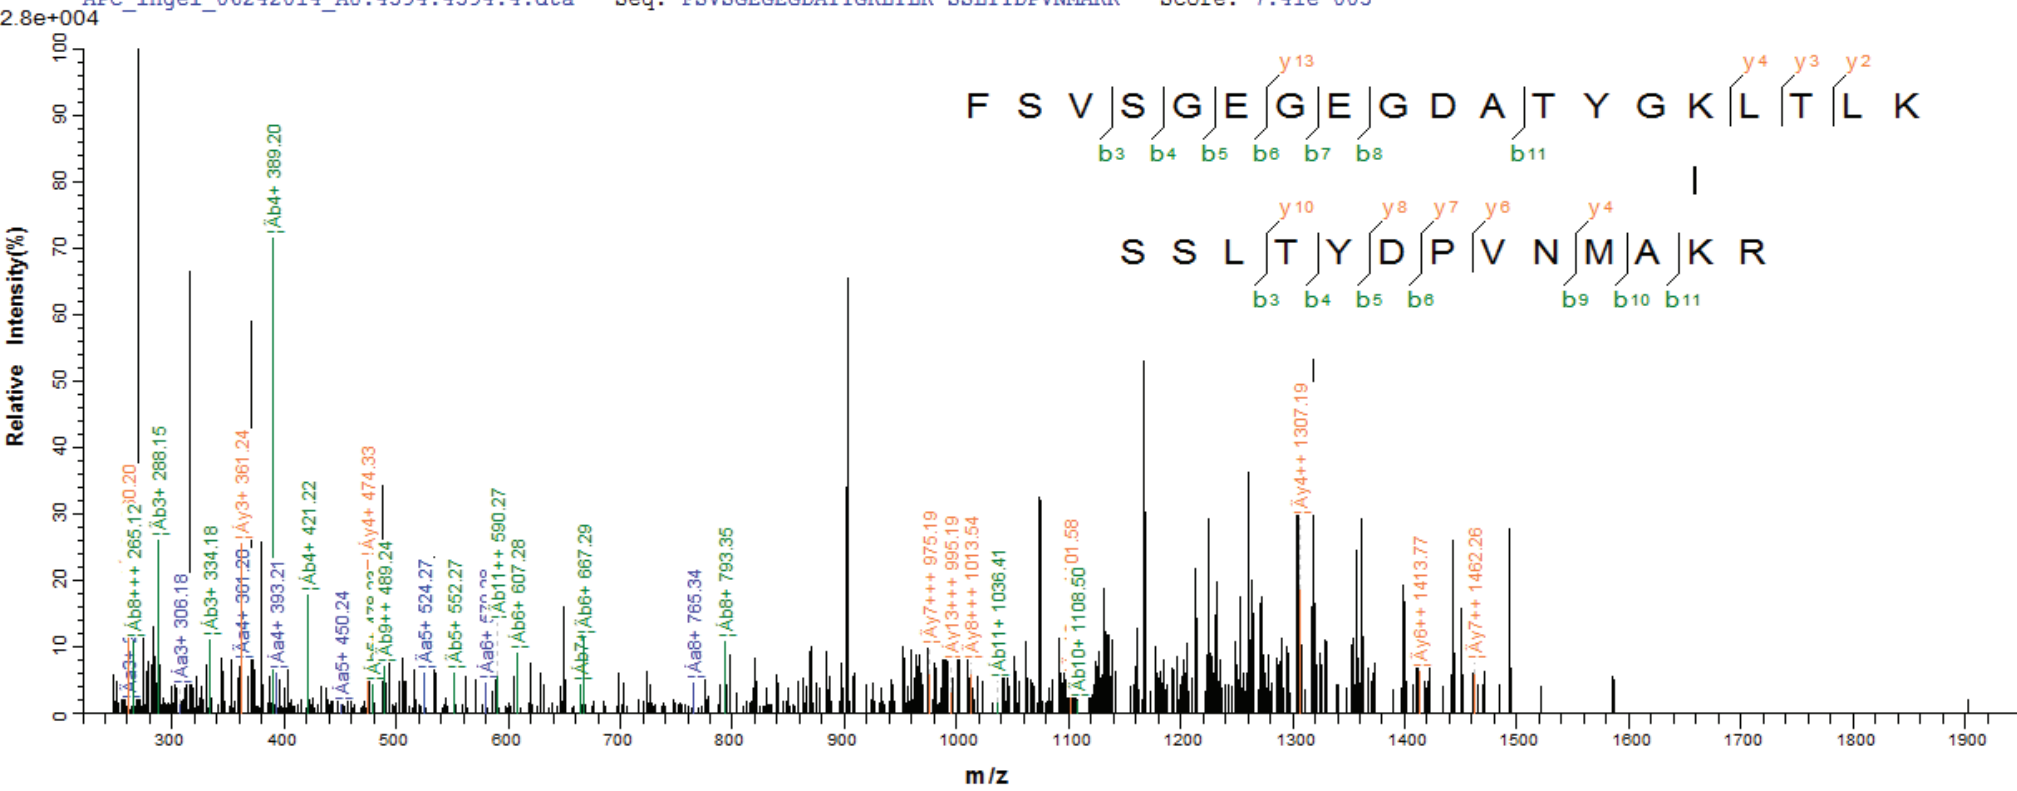

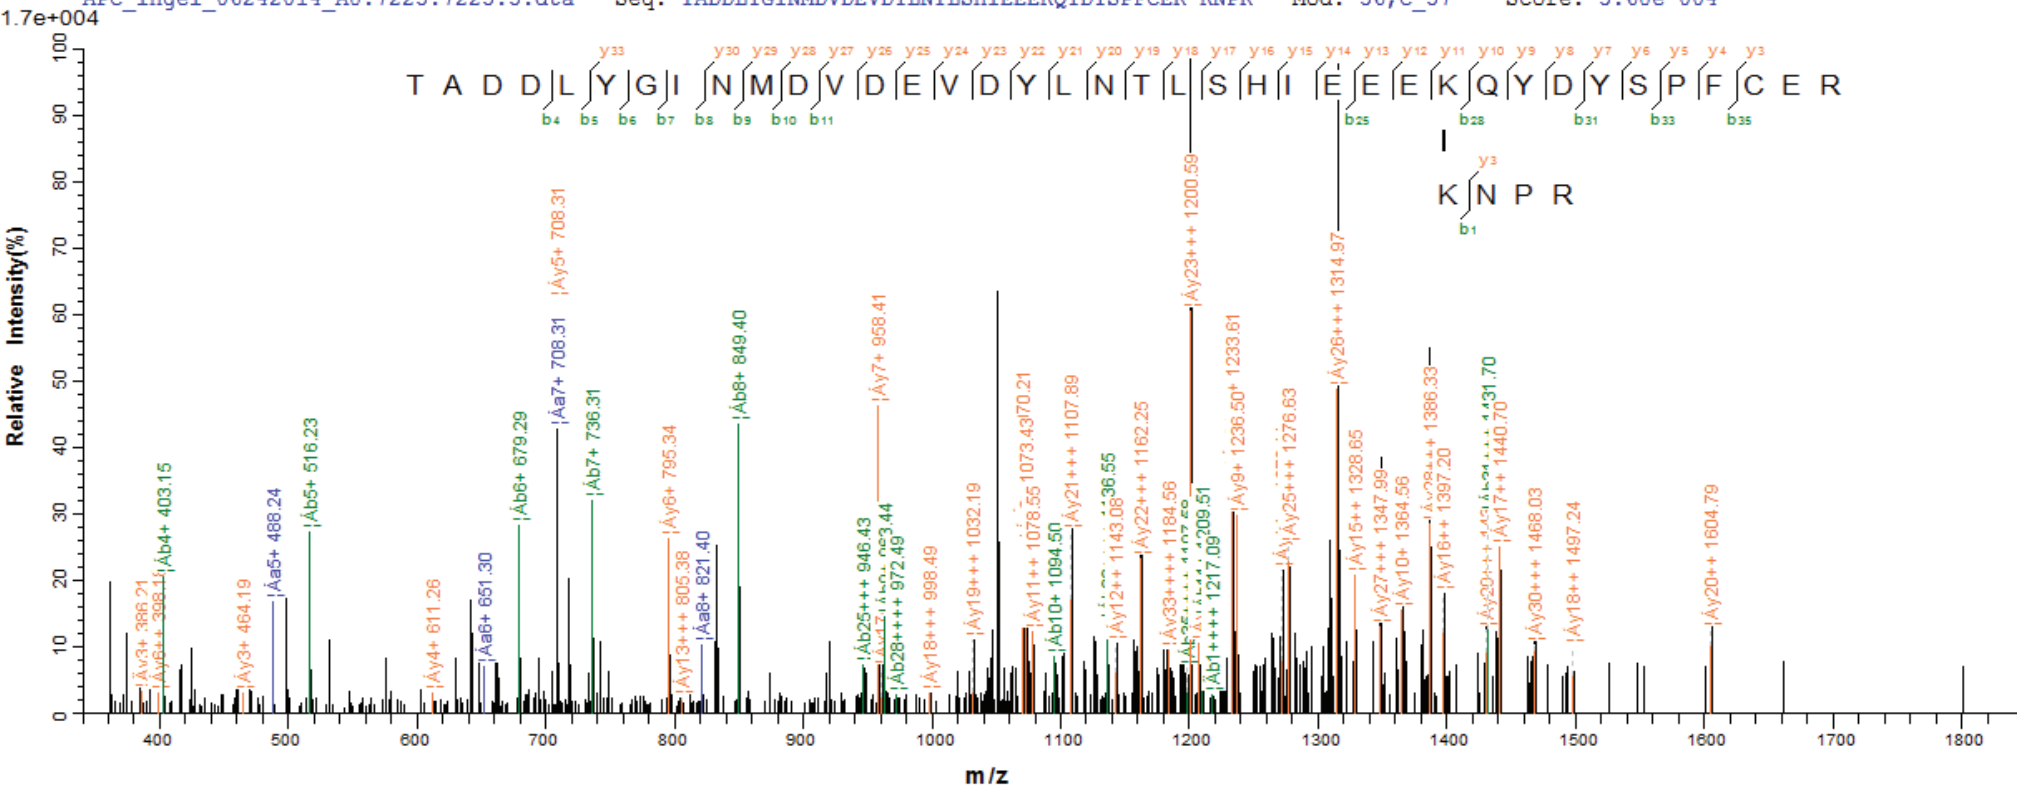

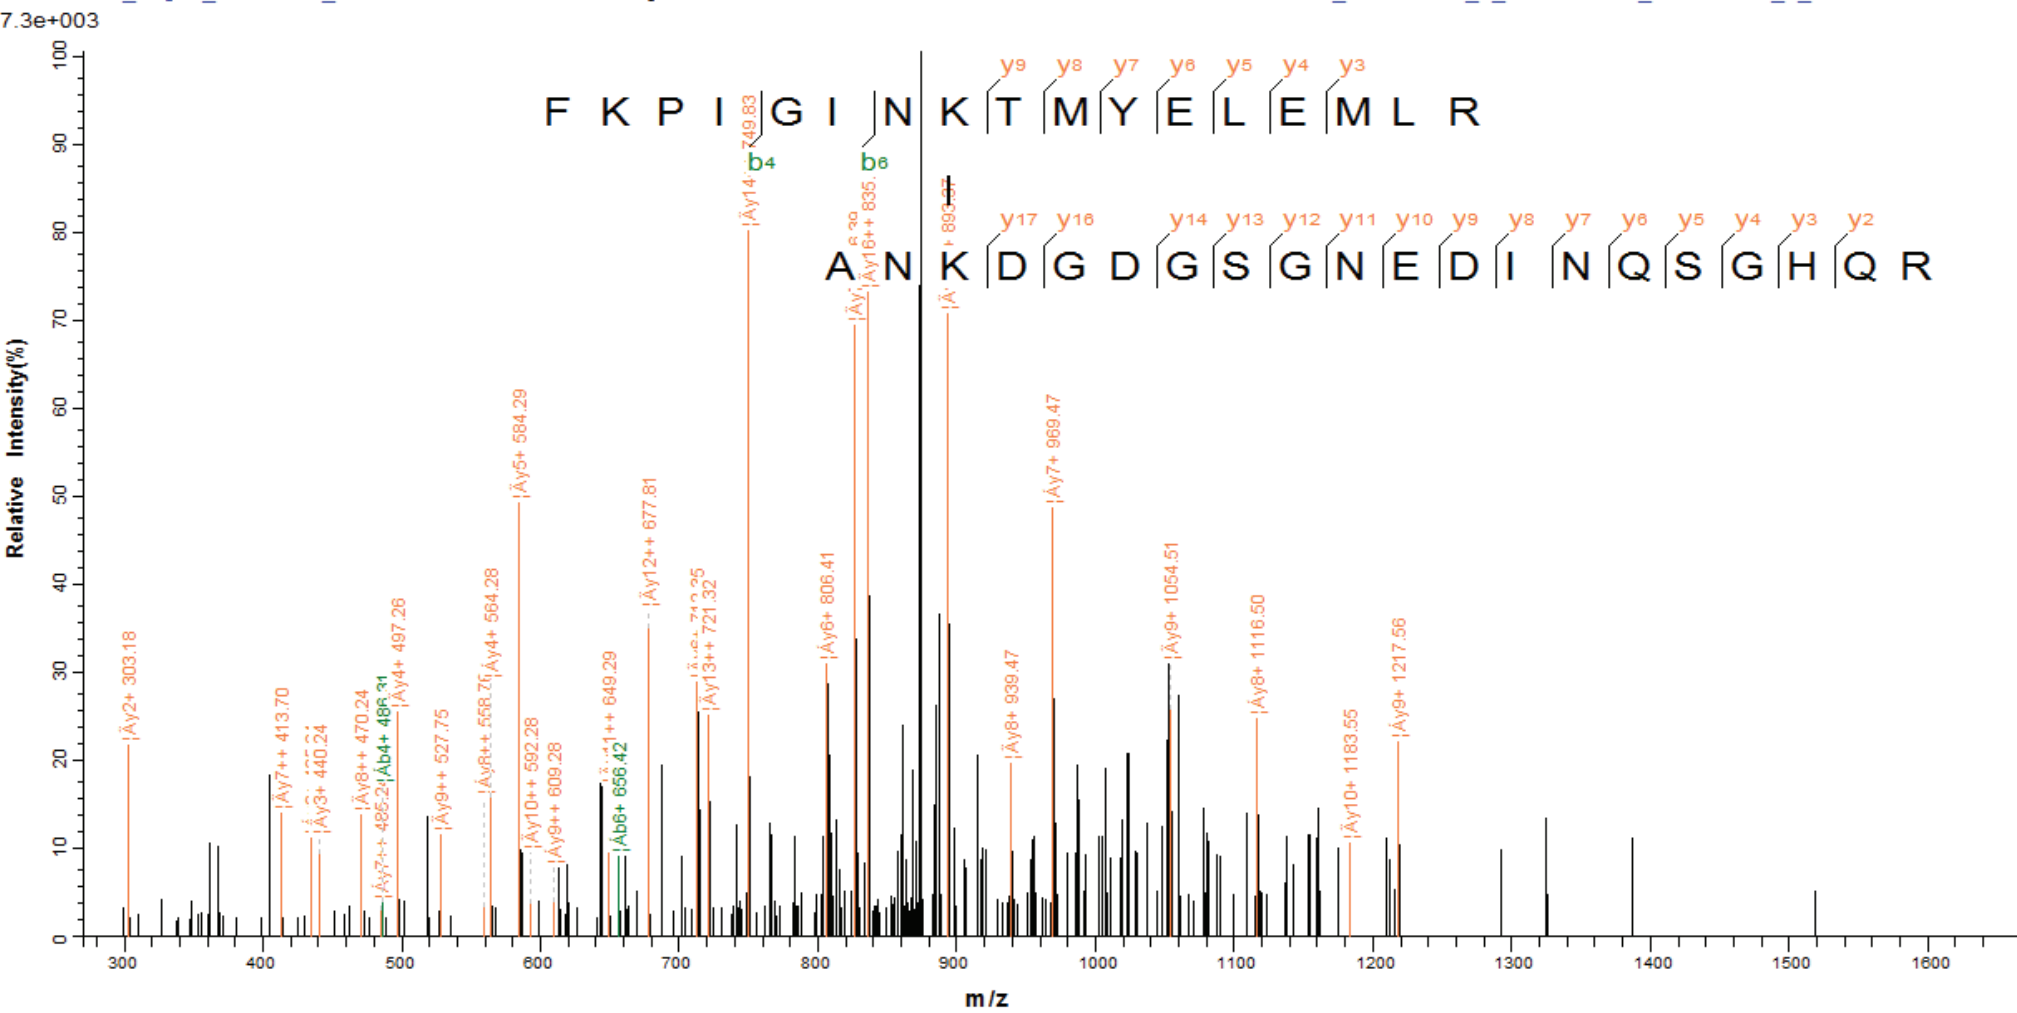

APC\_ingel\_06242014\_A9.3580.3580.4.dta

Seq: SIKASQTVDQNTSIYYR-TKYFQGK

Score: 1.44e-003

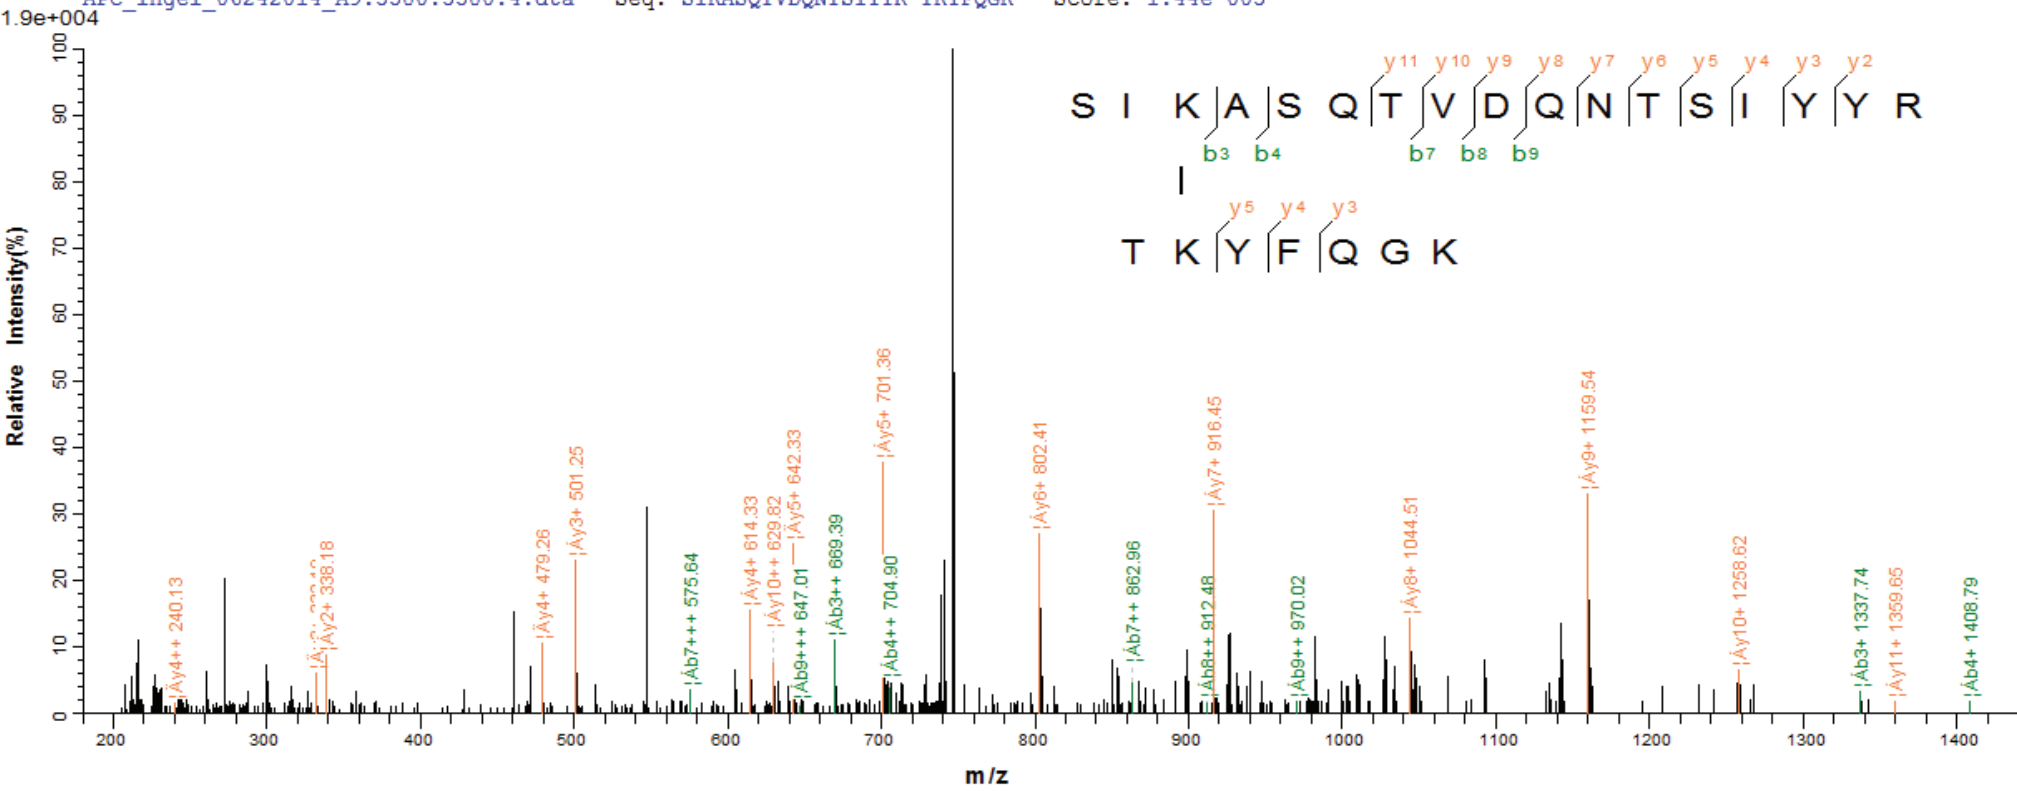

APC\_ingel\_06242014\_A8.2815.2815.5.dta

Seq: SIKASQVTVDQNTSIYYR-KGELTISSTKK

Score: 4.10e-009

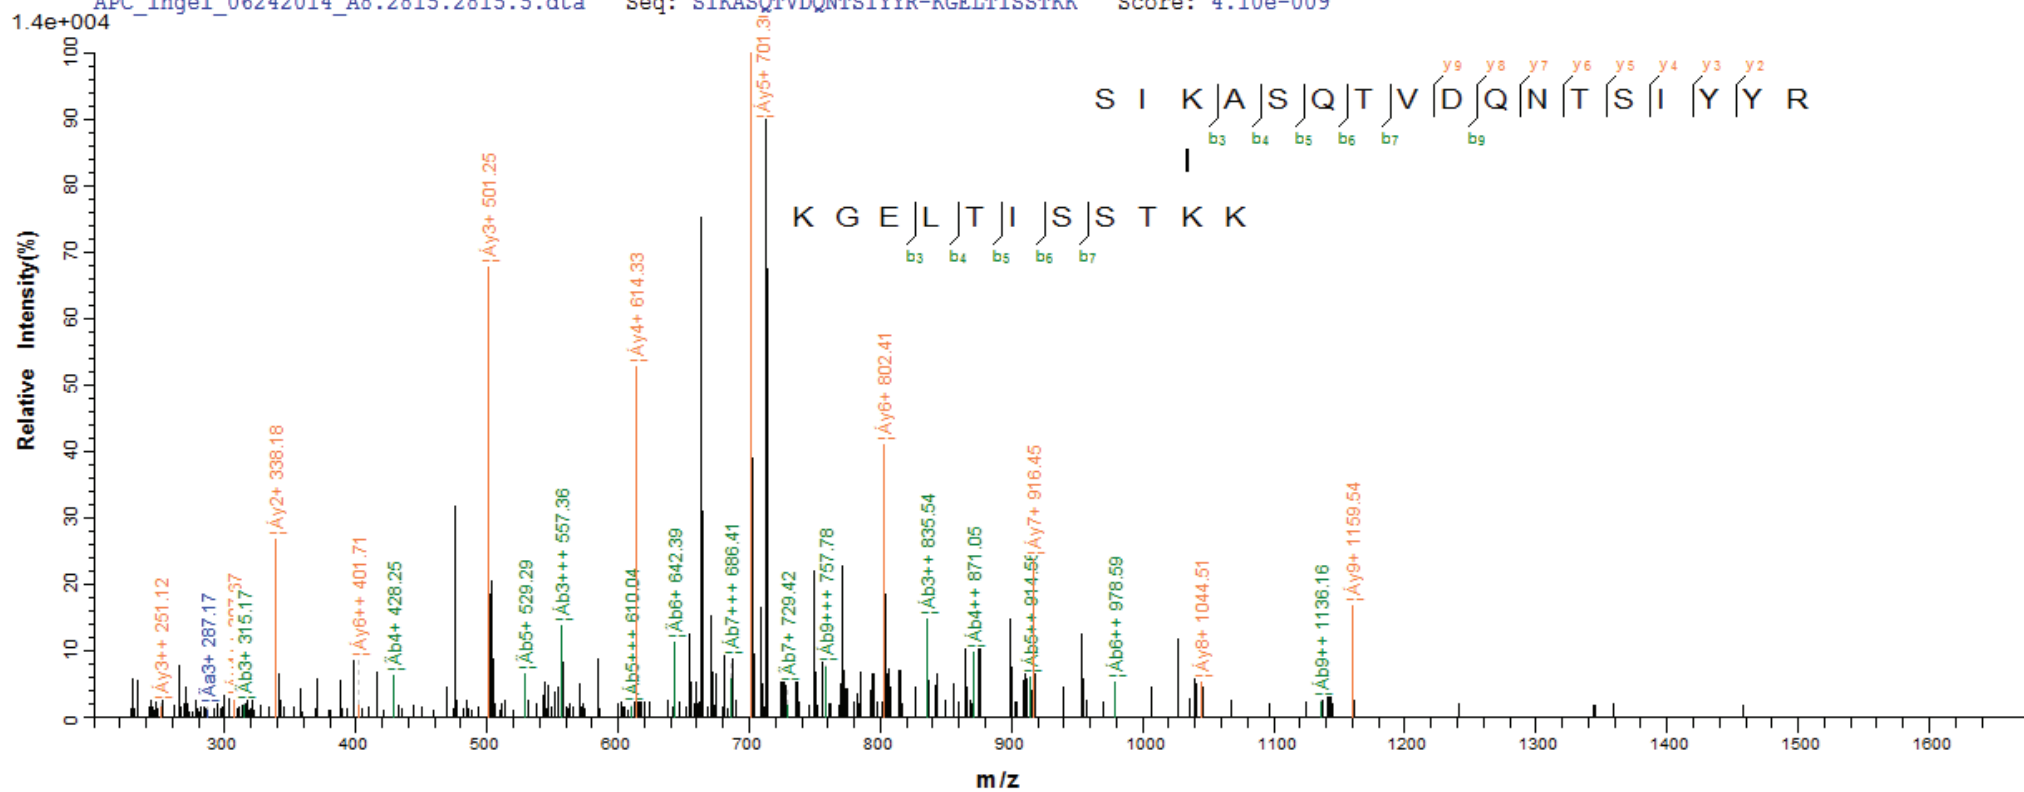

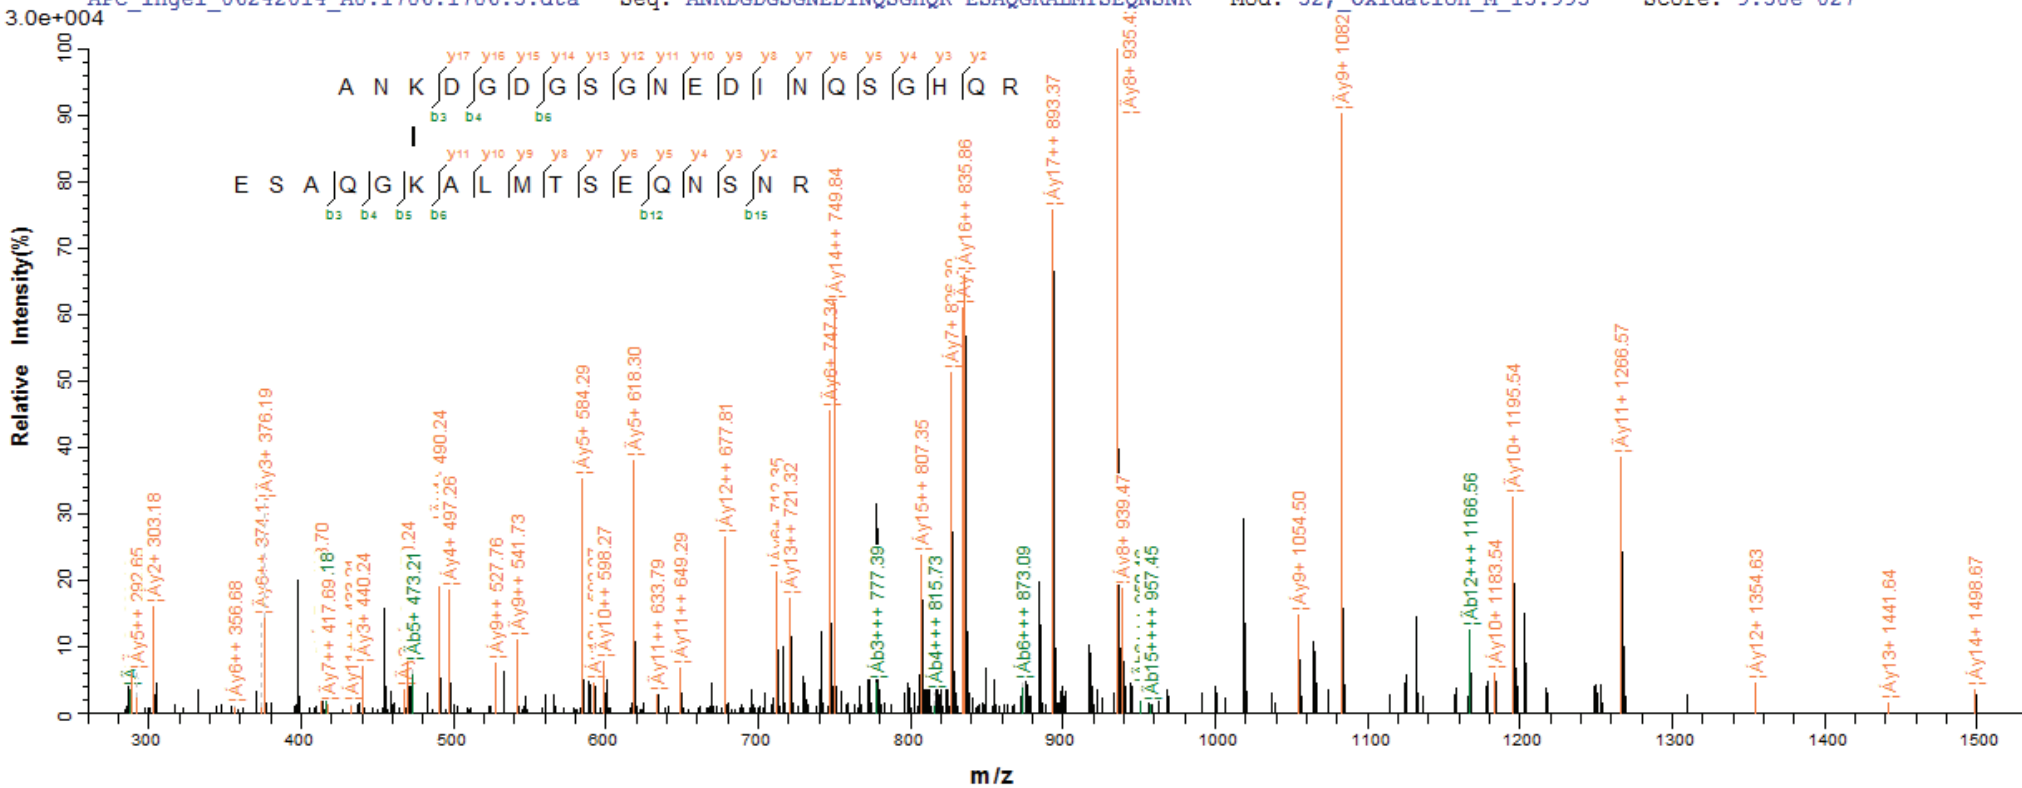

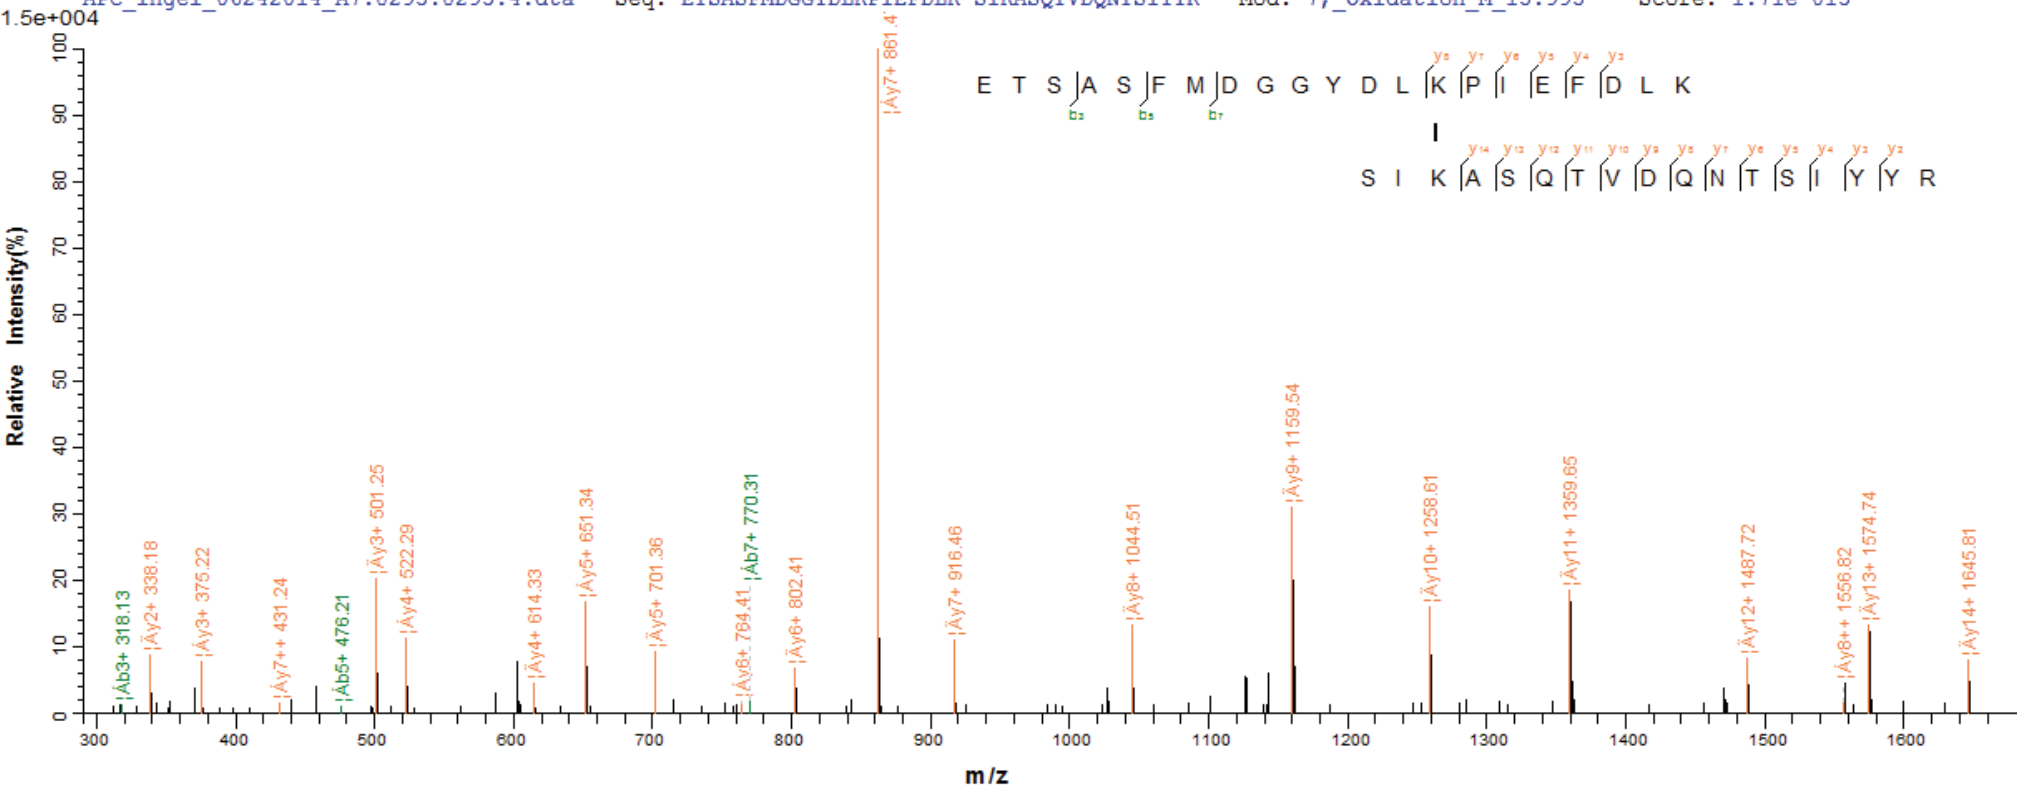



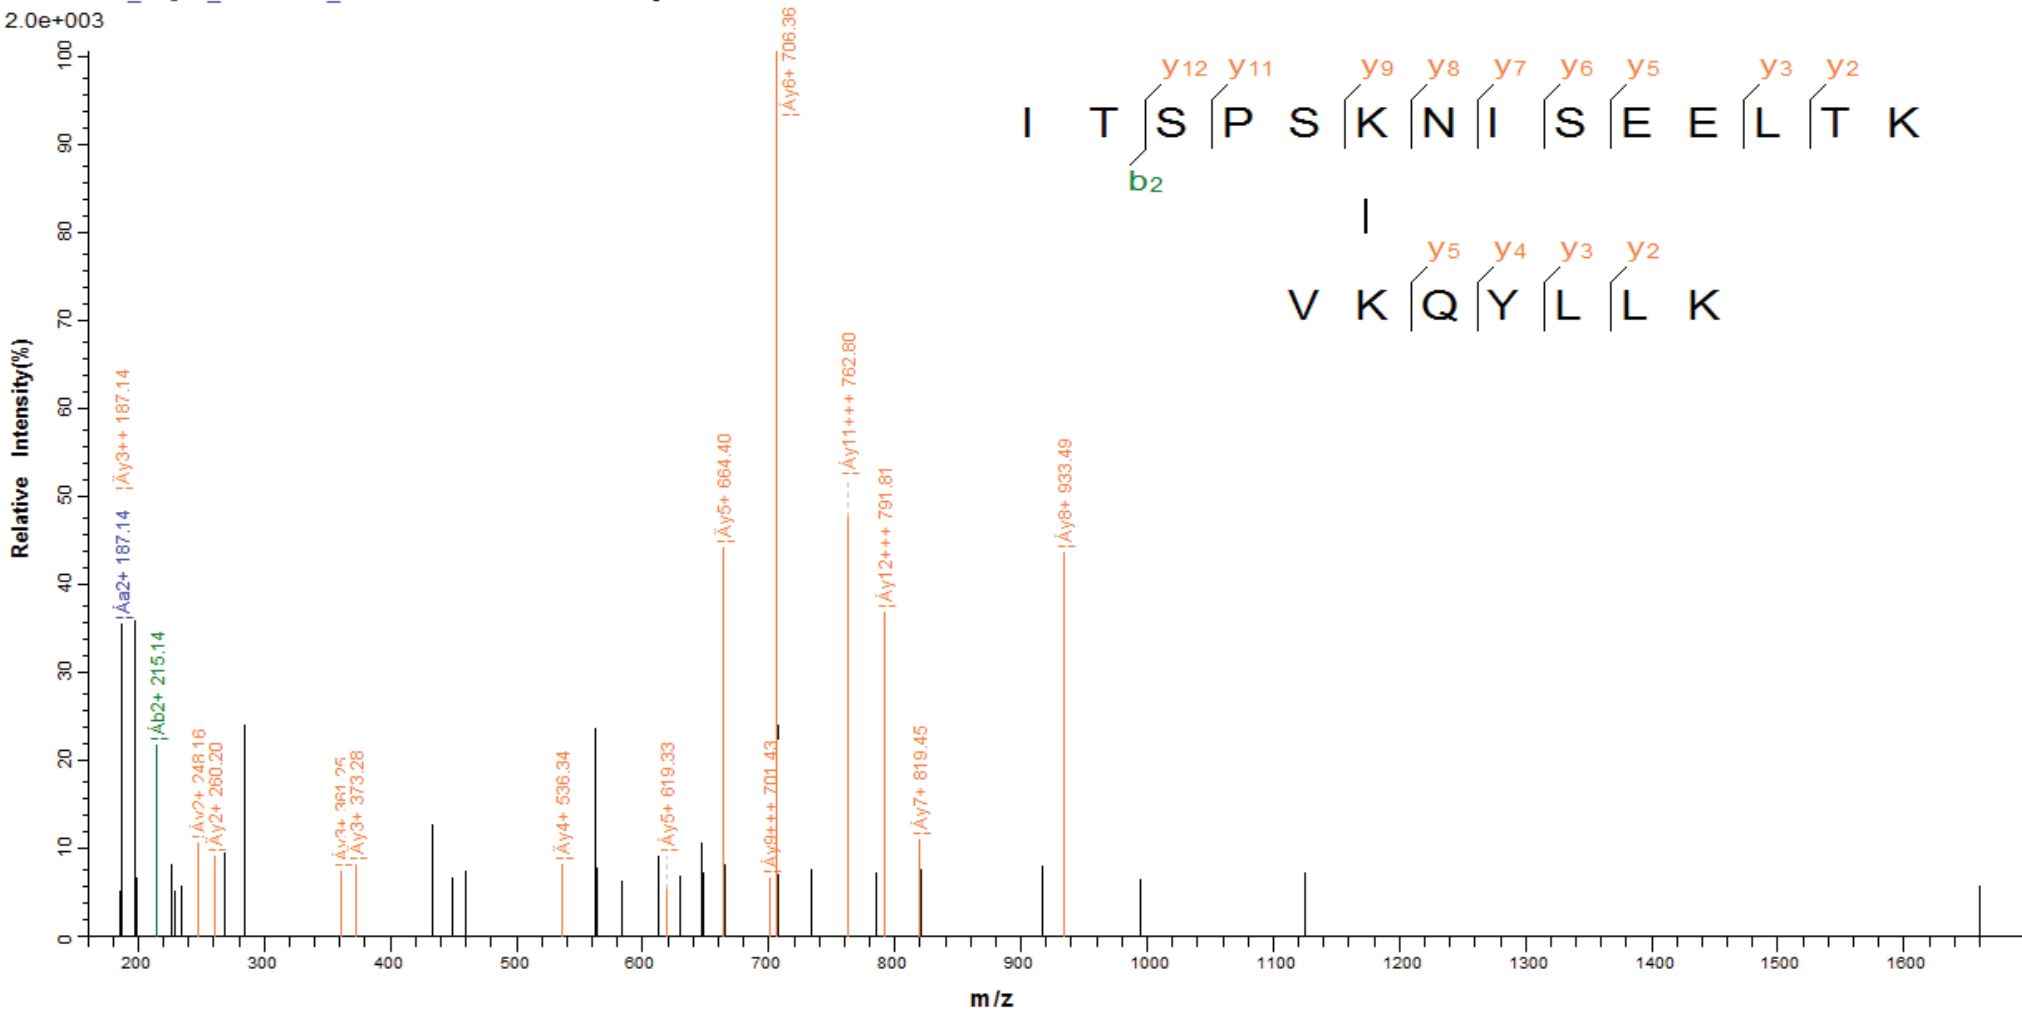

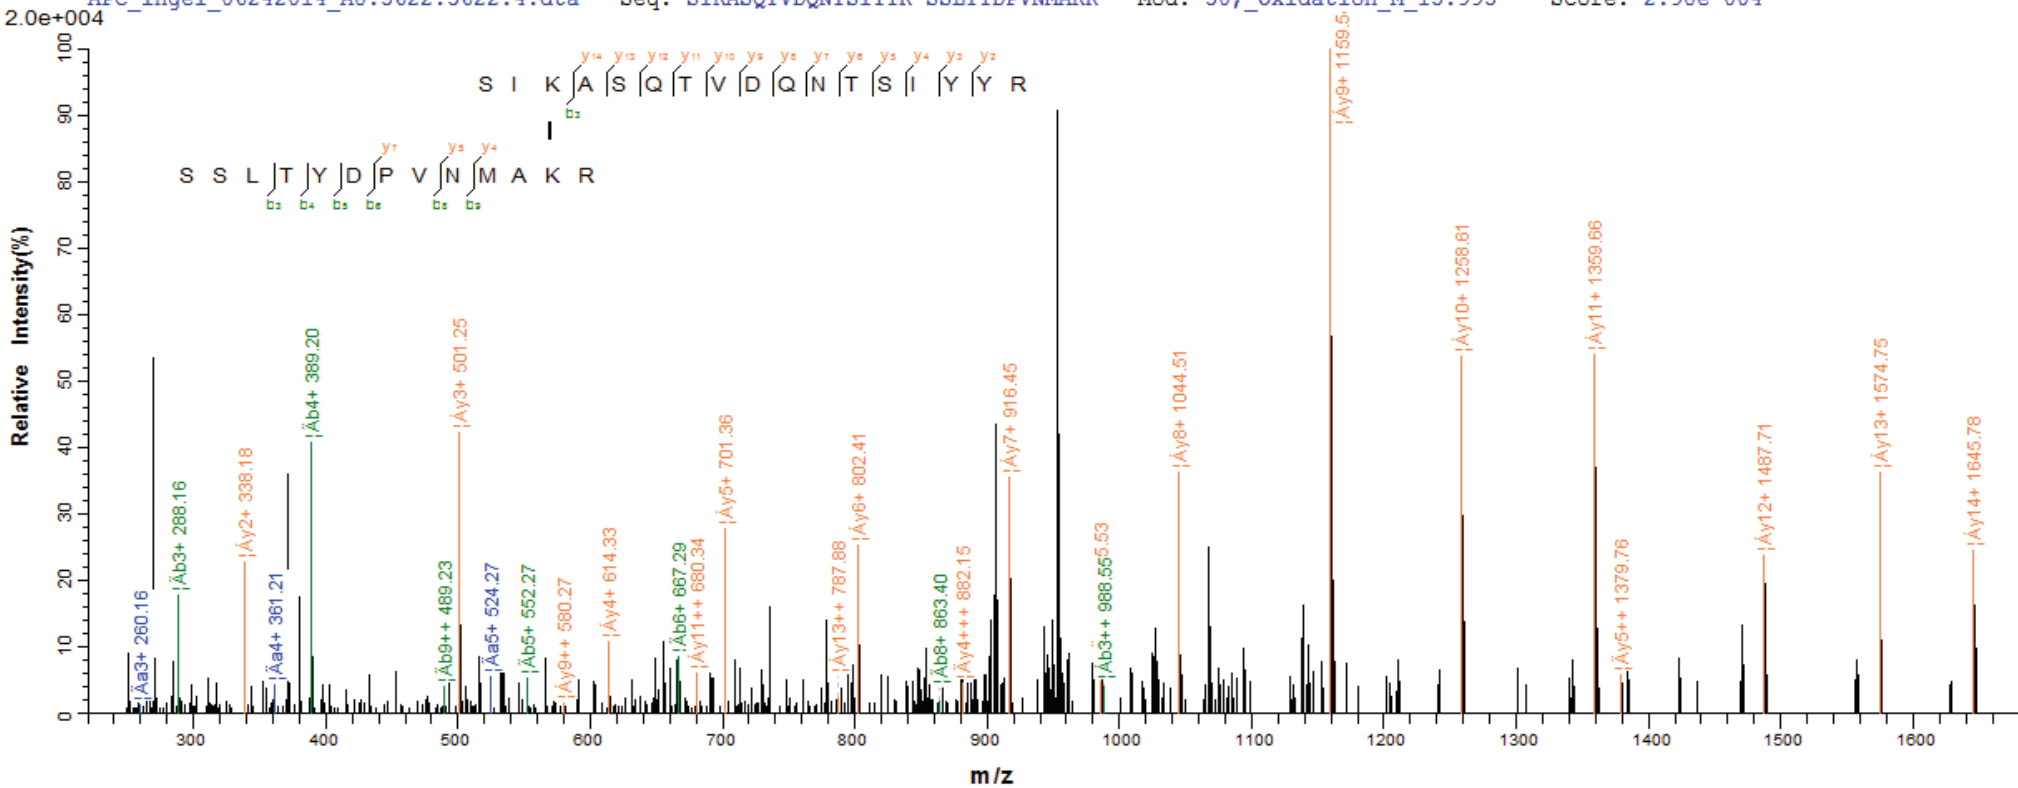

APC\_ingel\_06242014\_A8.5174.5174.4.dta Seq: LAQLYEELEDLQECKK-KTGLDAAGNSQK Mod: 14,C\_57 Score: 5.79e-020

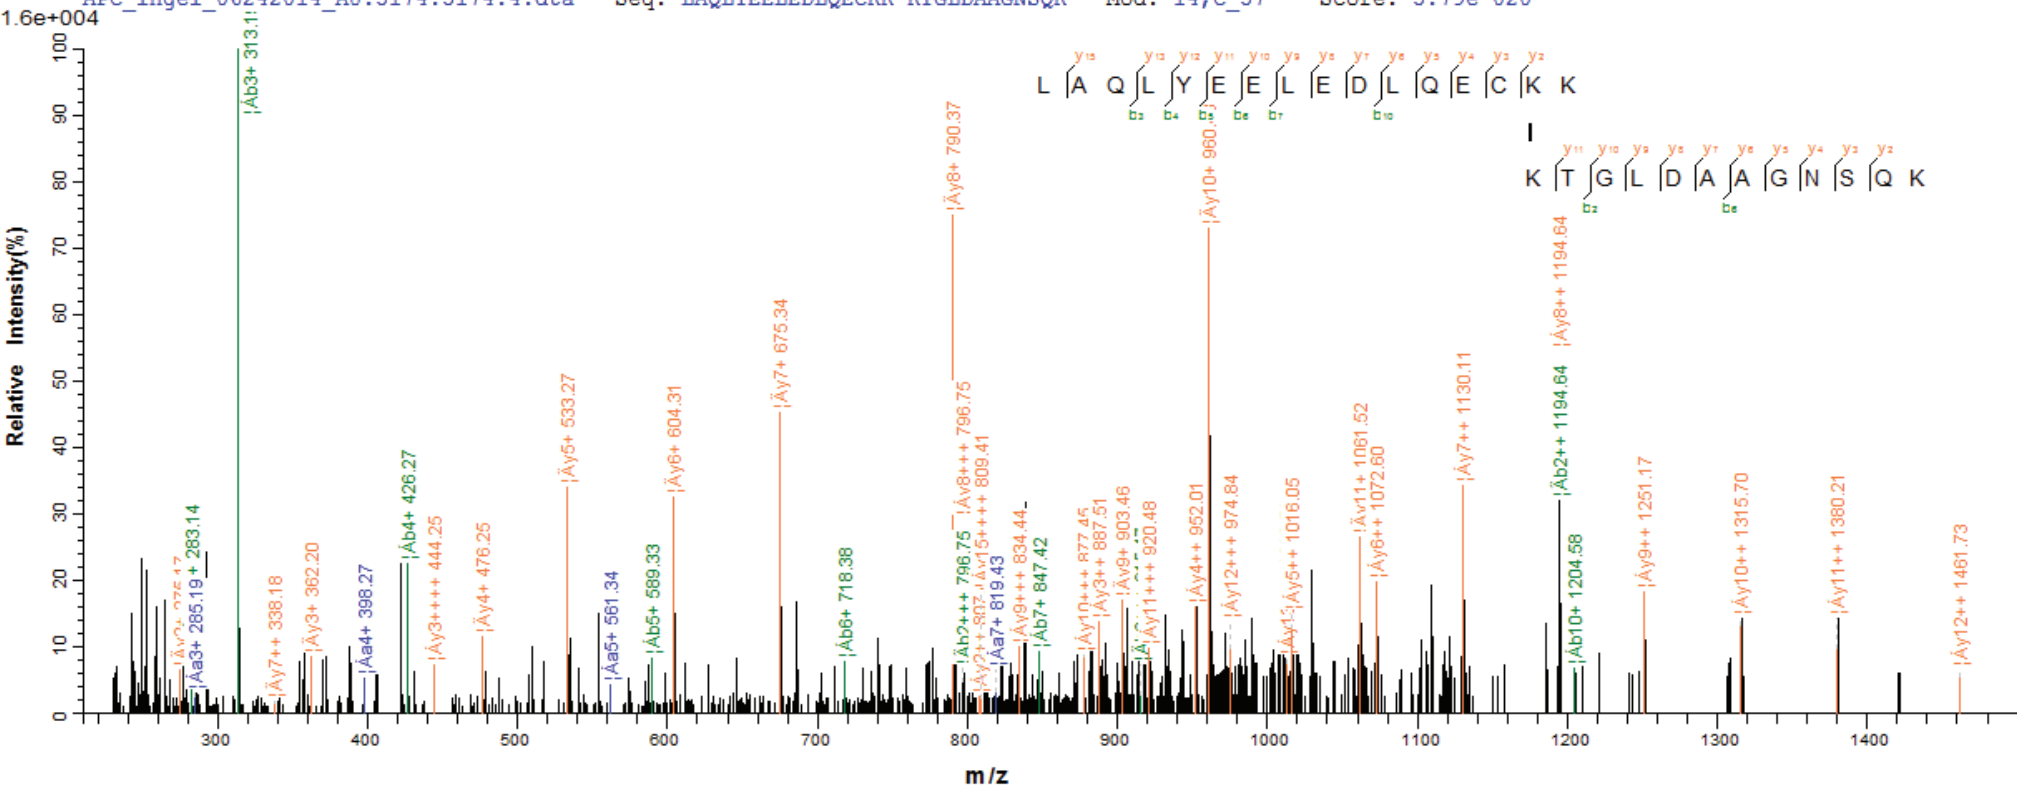

APC\_ingel\_06242014\_A8.4927.4927.5.dta Seq: LAQLYEELEDLQECKK-KGELTISSTKK Mod: 14,C\_57 Score: 8.59e-010

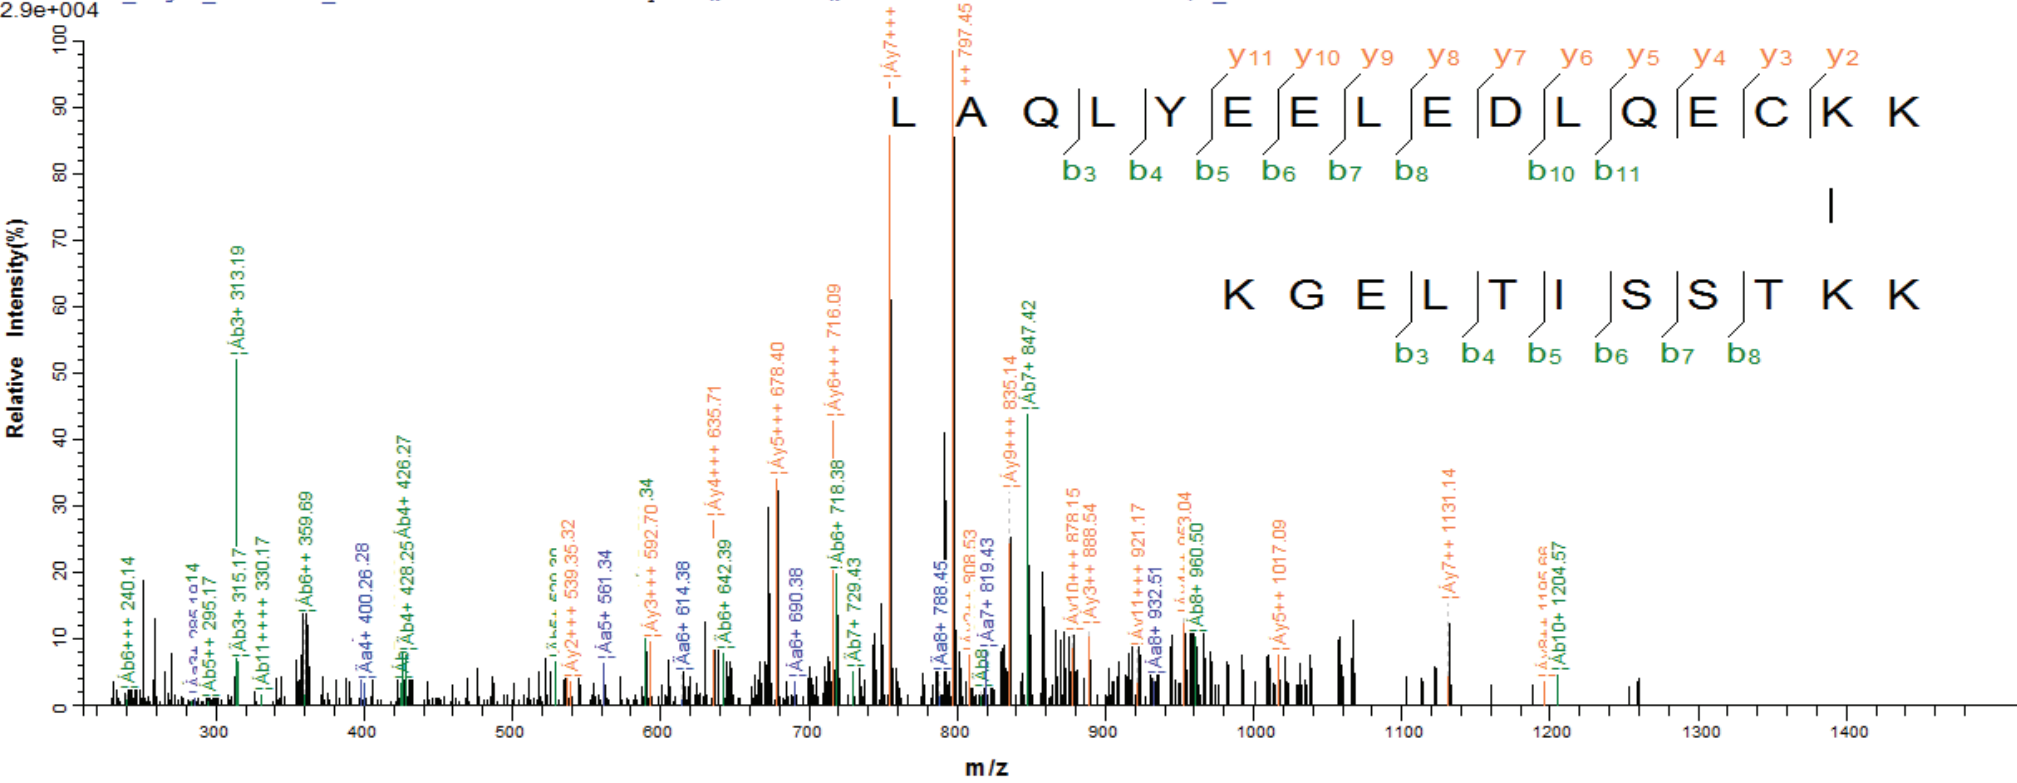

L A Q L Y E E L E D L Q E C K K  
 b3 b4 b5 b6 b7 b8 b10 b11  
 K G E L T I S S T K K  
 b3 b4 b5 b6 b7 b8

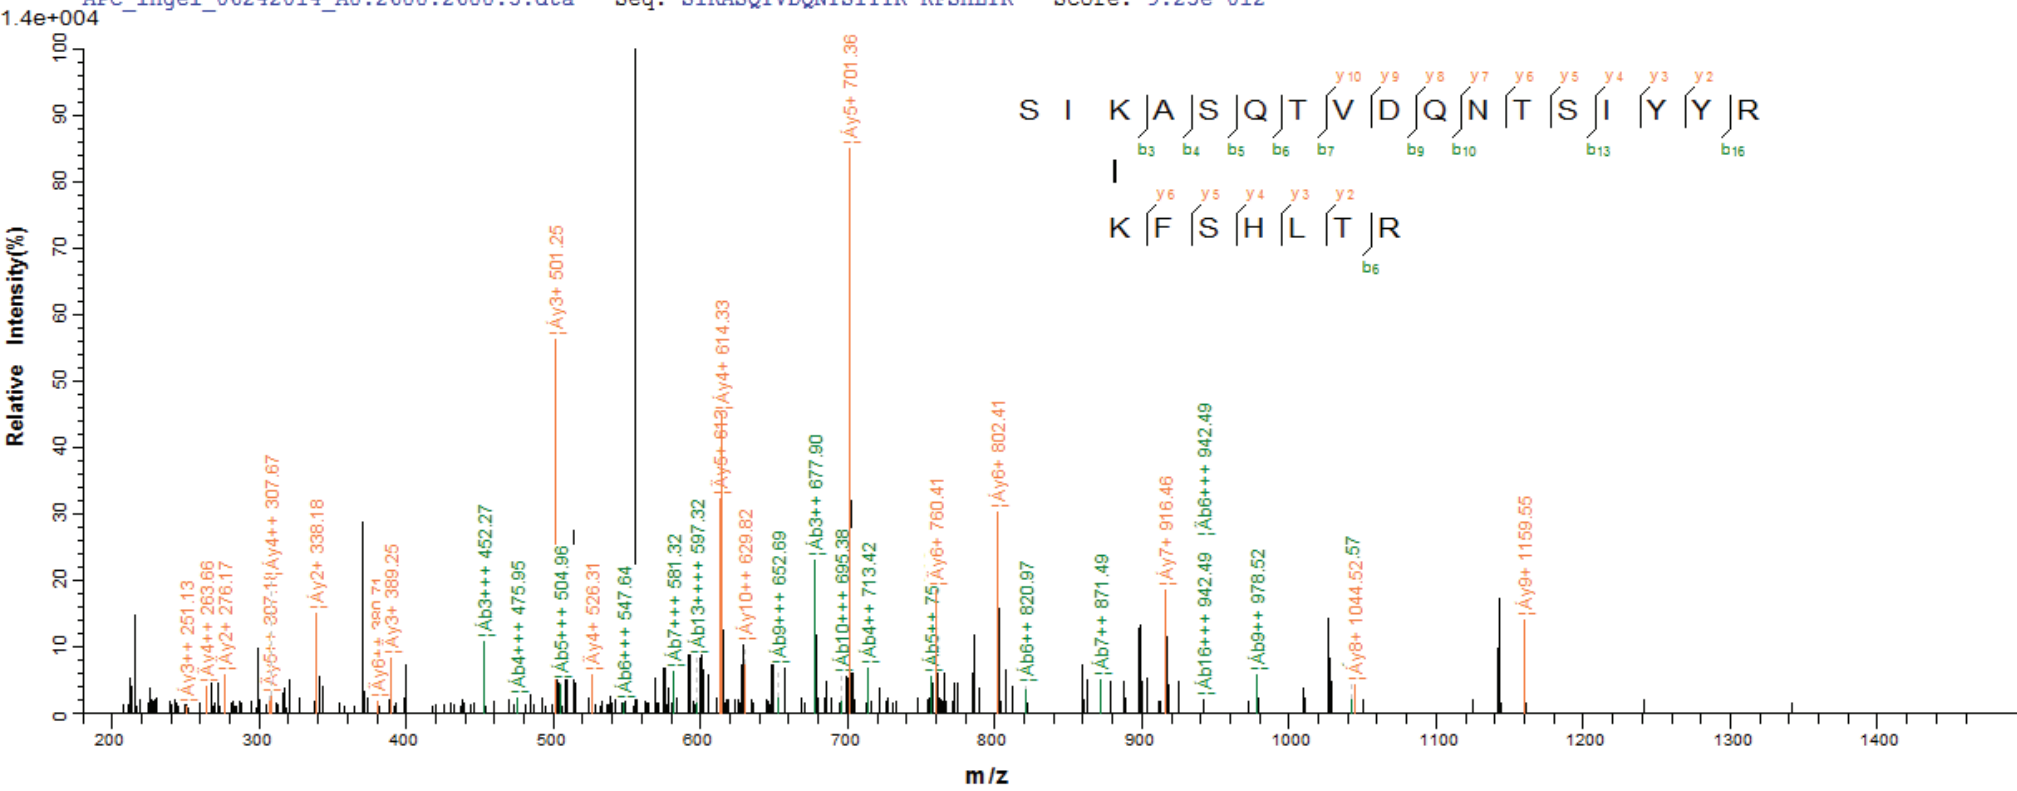

APC\_ingel\_06242014\_A7.4158.4158.5.dta

Seq: ANKDGDSGNEDINQSGHQR-SVKWCIEDQCLR

Mod: 28,C\_57 33,C\_57

Score: 8.49e-013

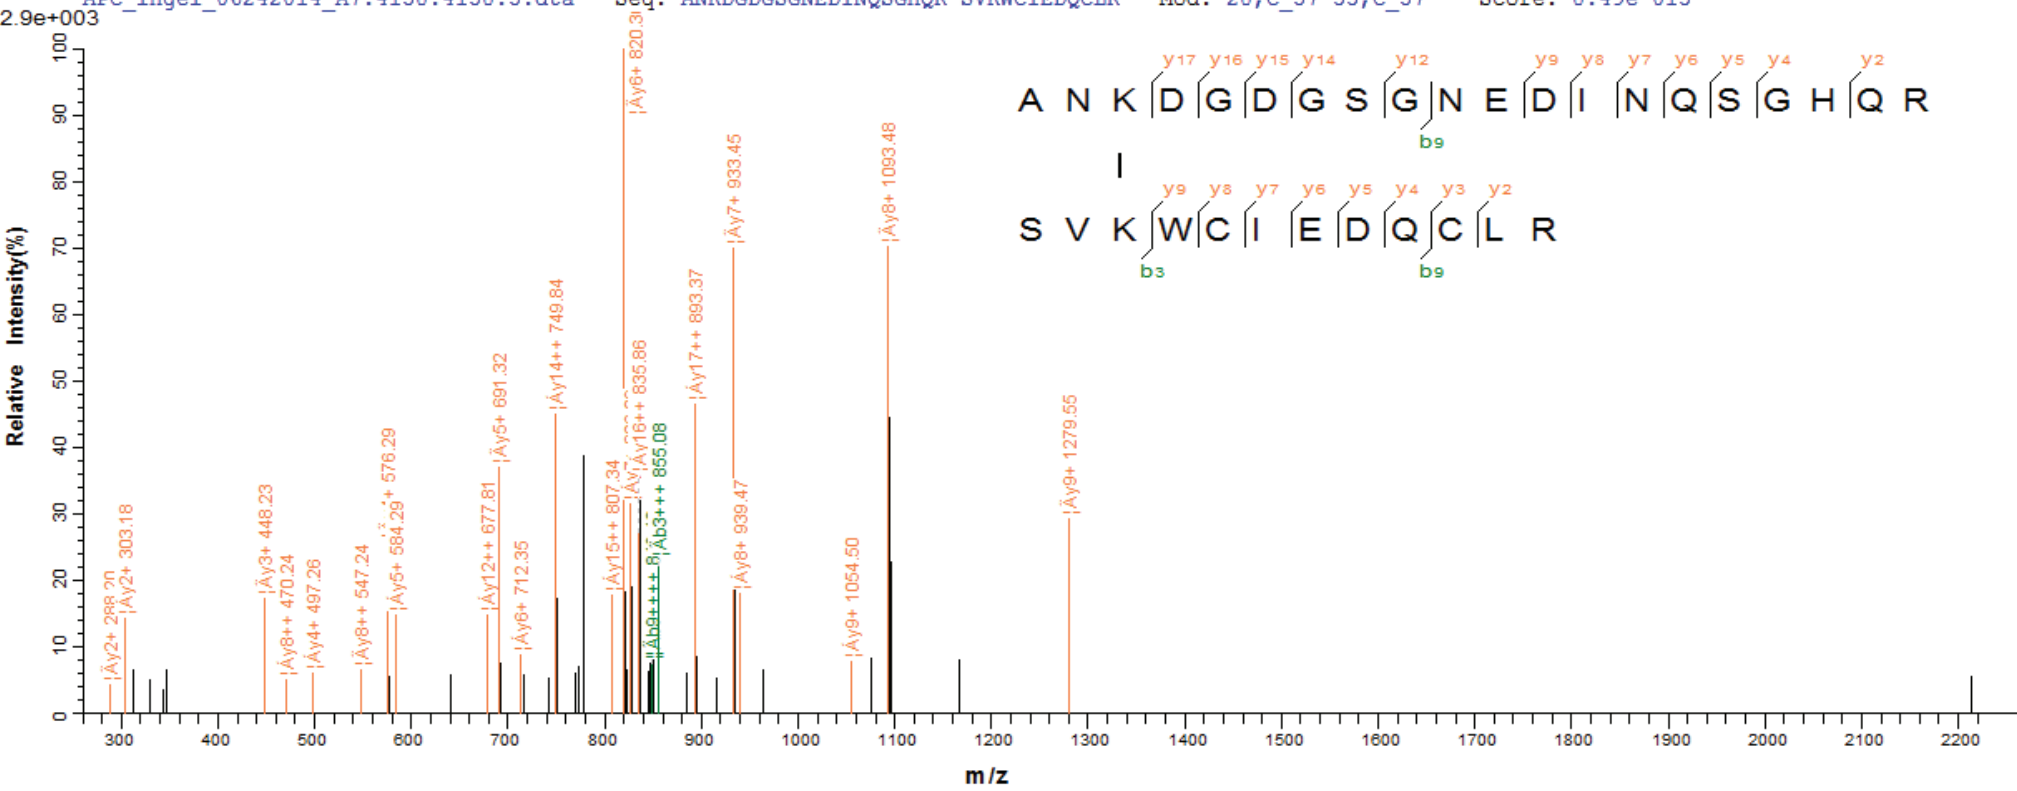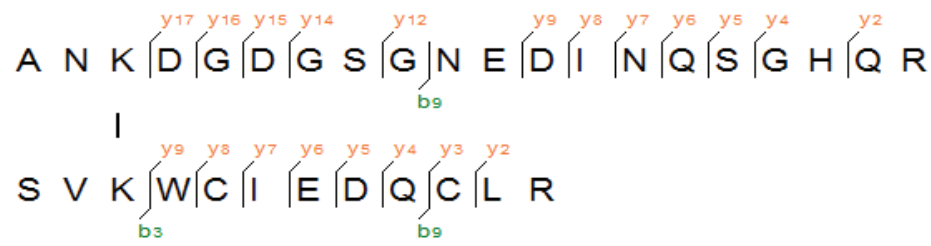

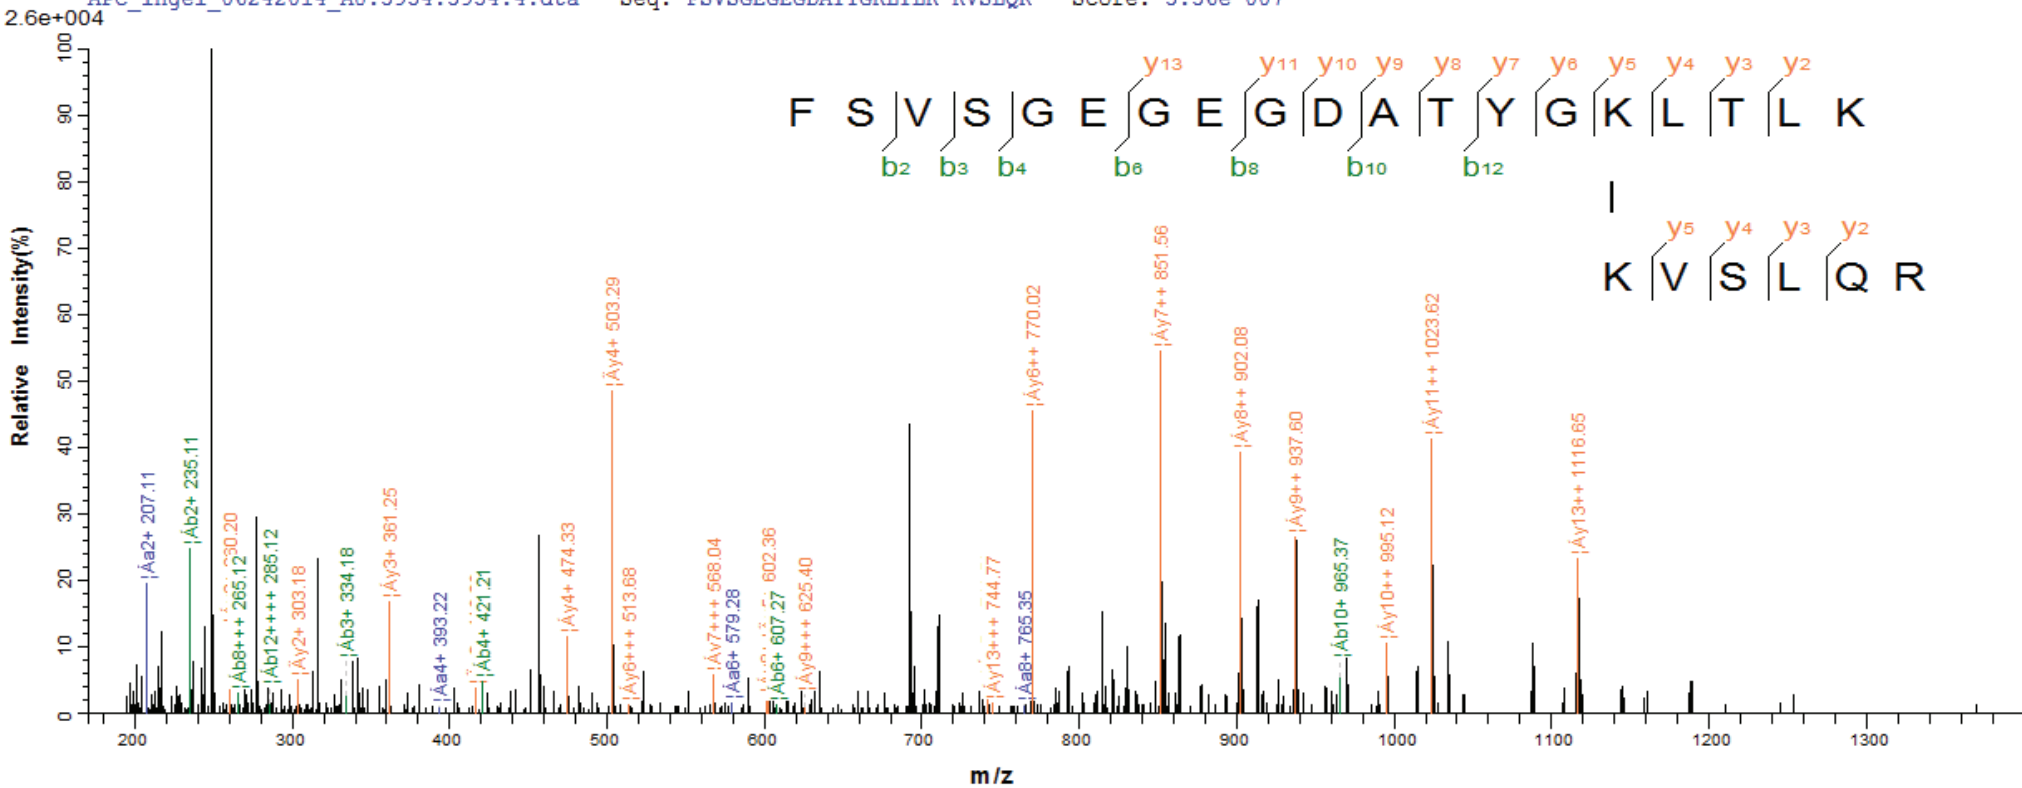

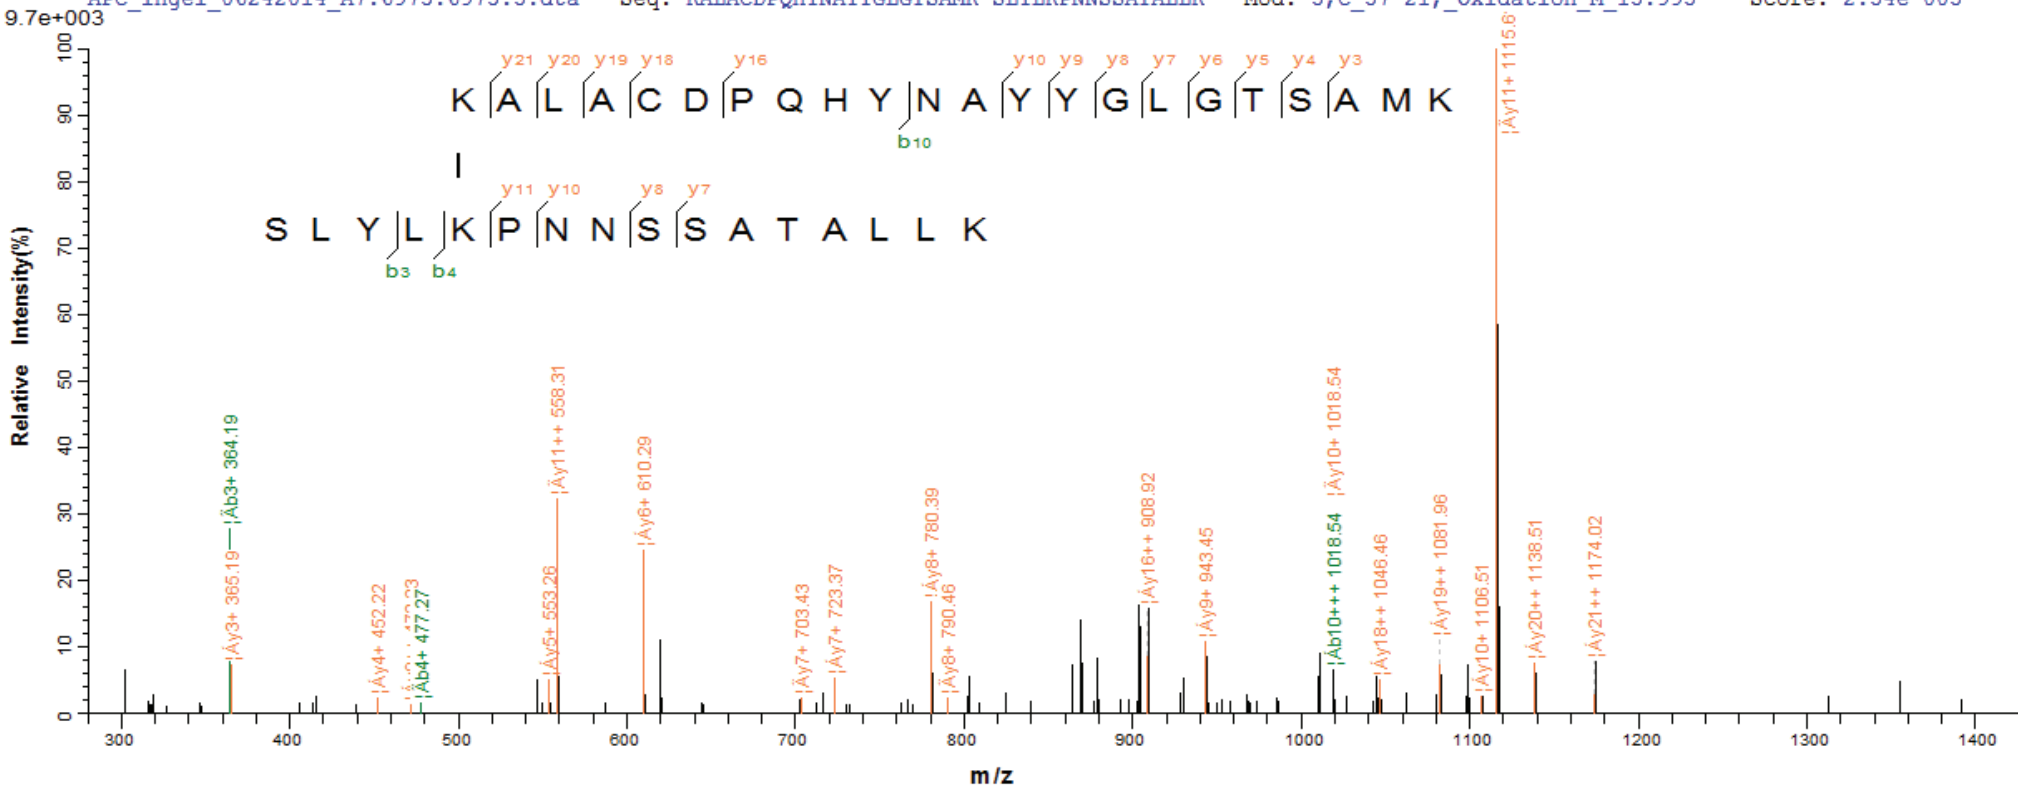



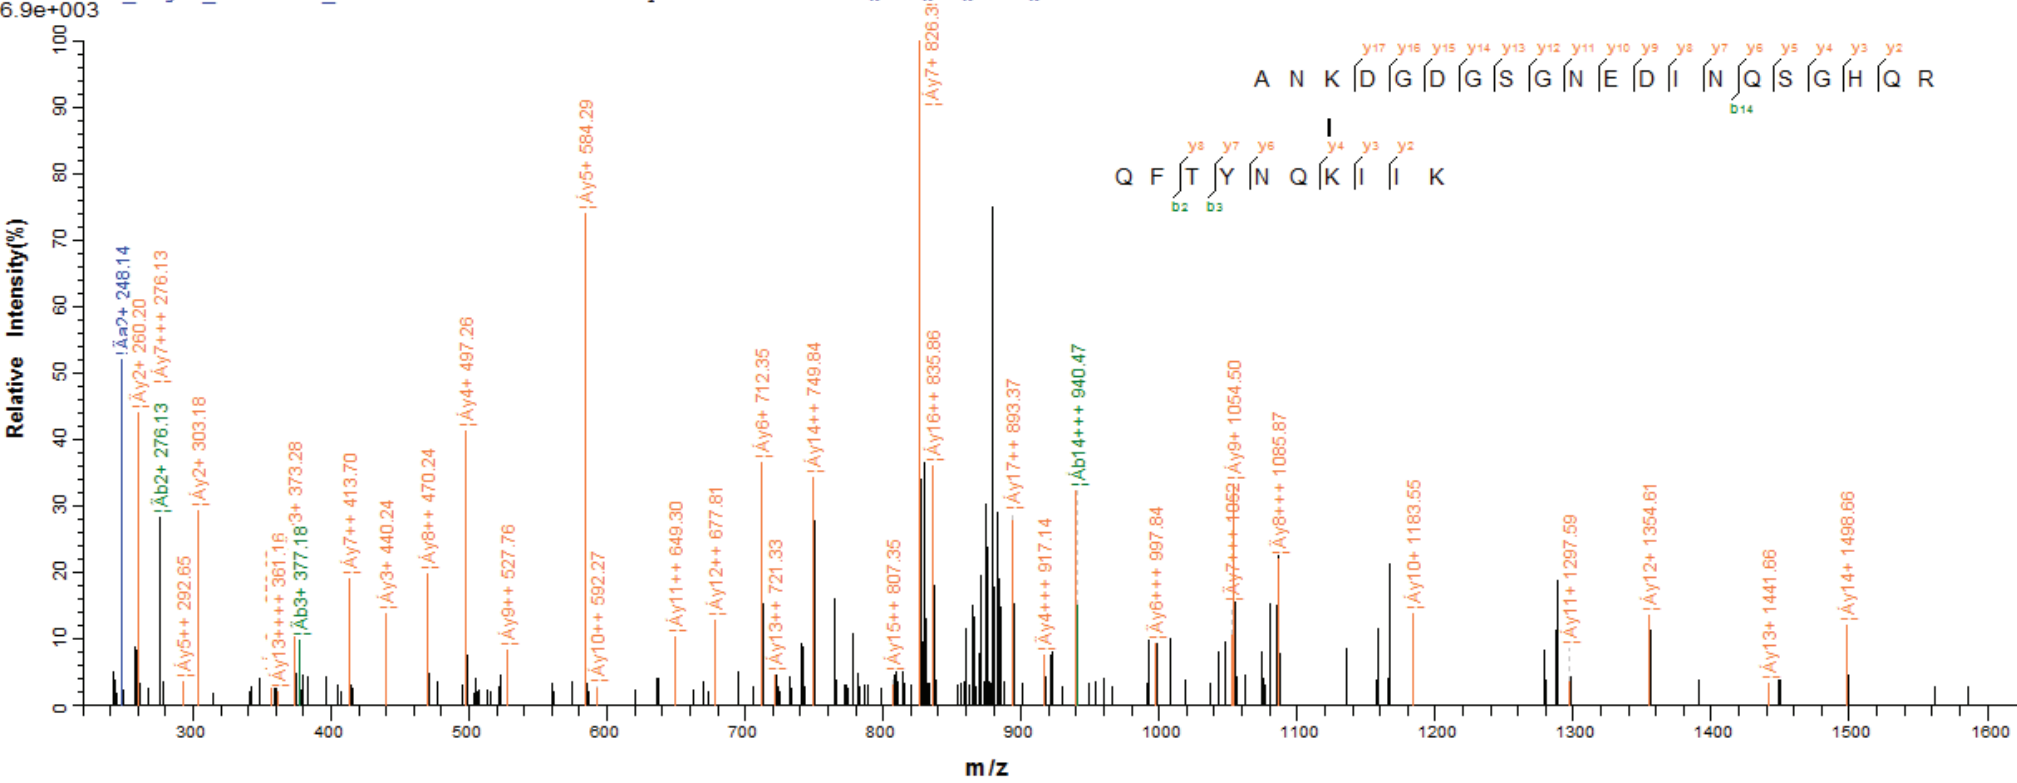

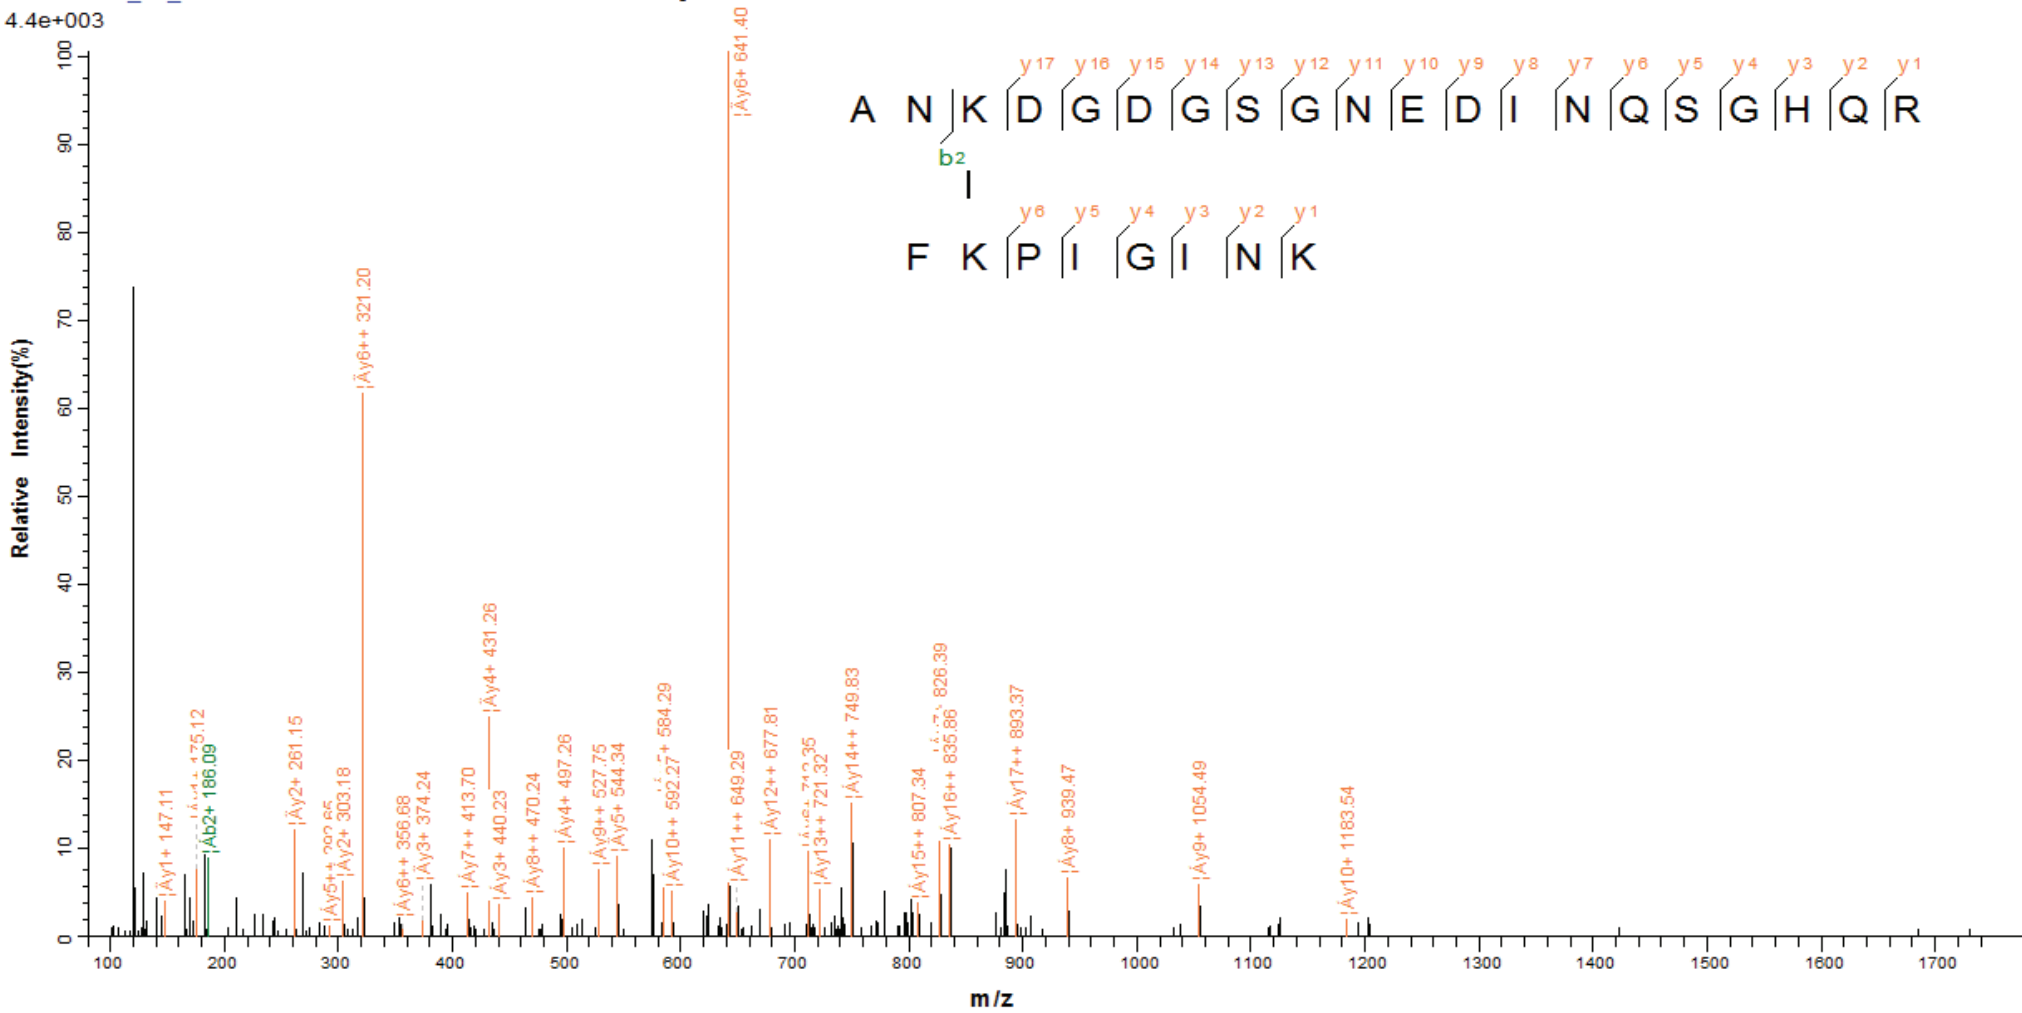

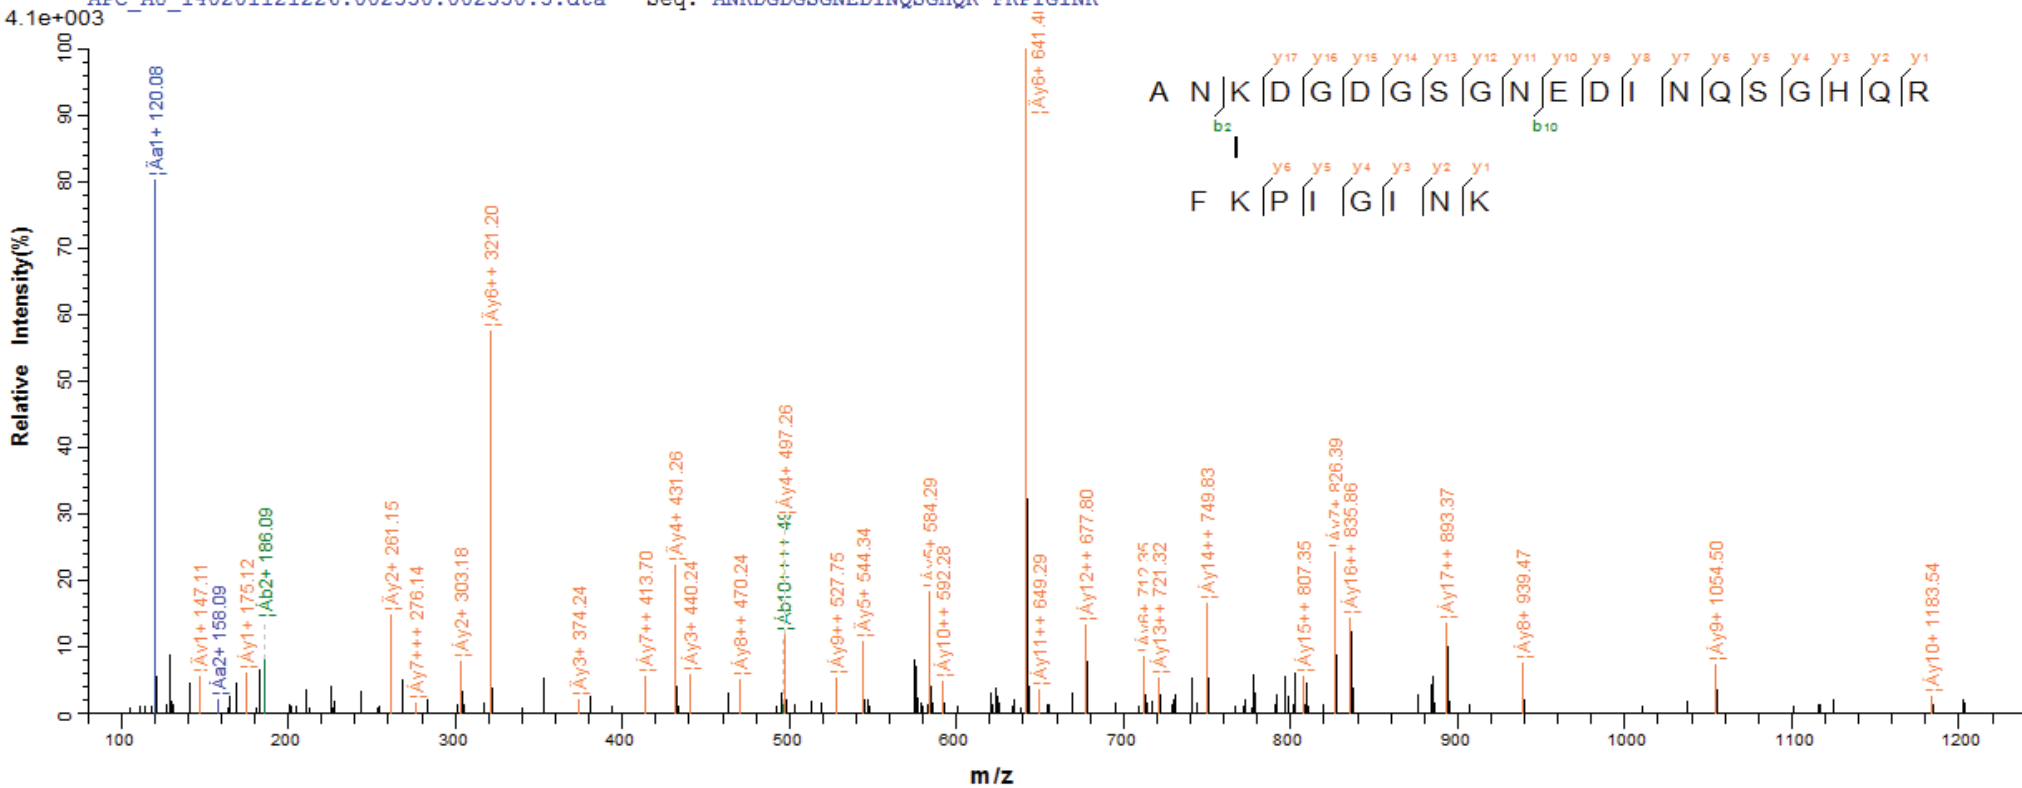

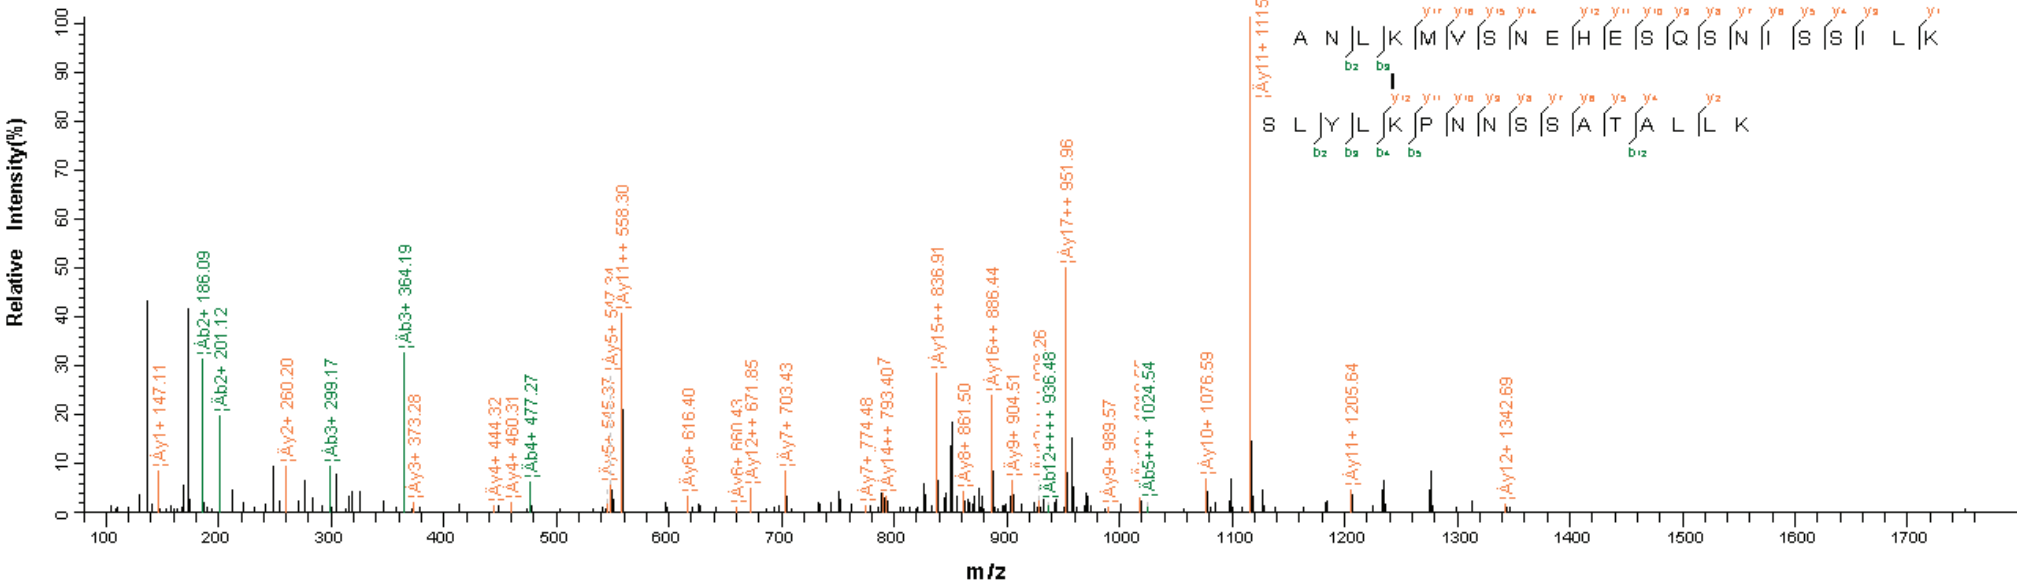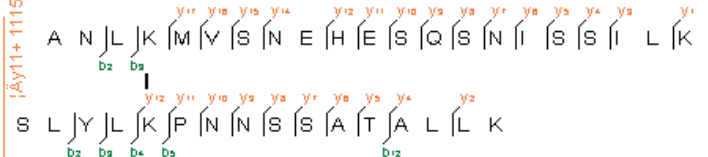

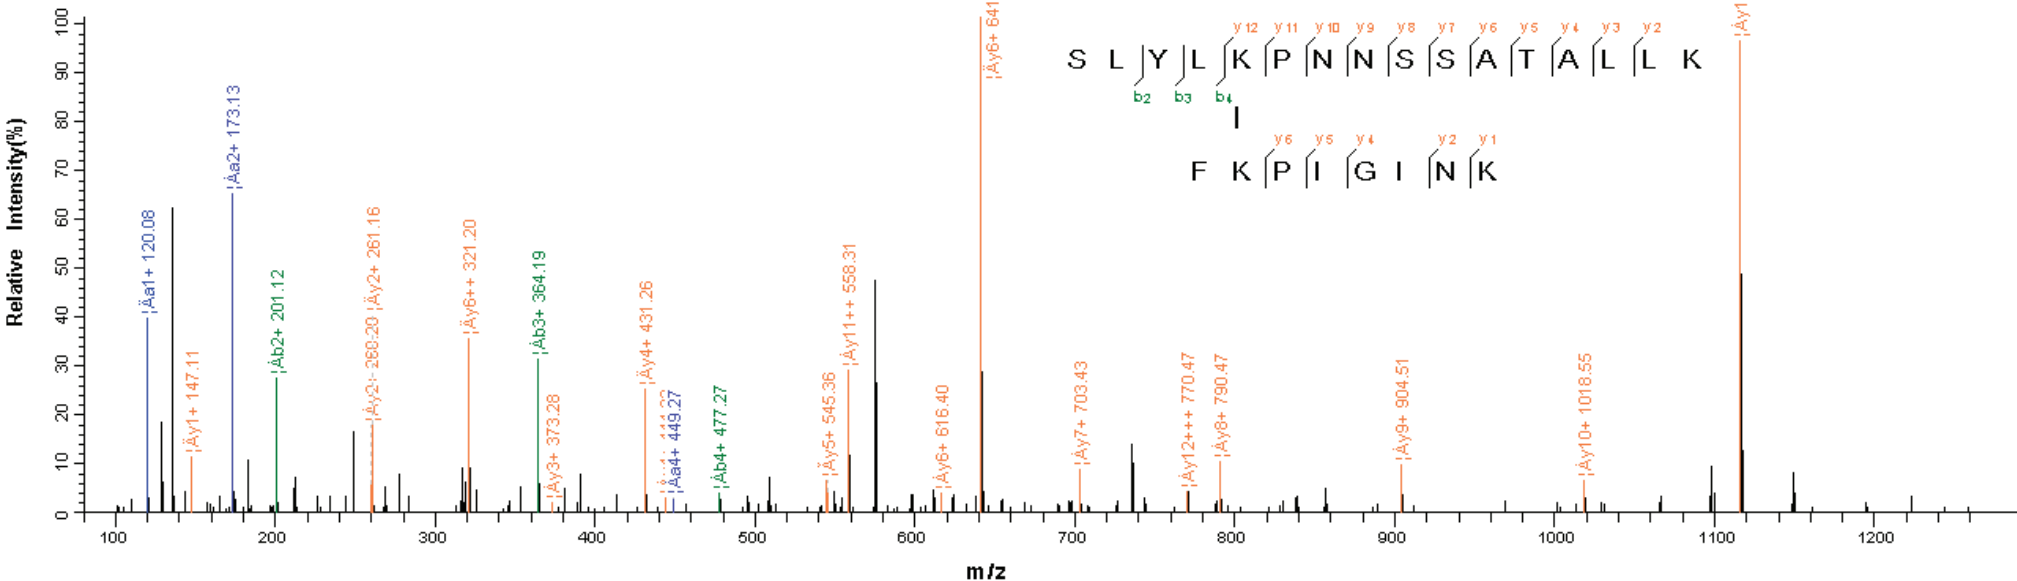

5.2e+003 PC\_A8\_140201121226.006134.006134.6.dta Seq: LYSKFLSWDKK-NKLFLLSHR Charge: 6

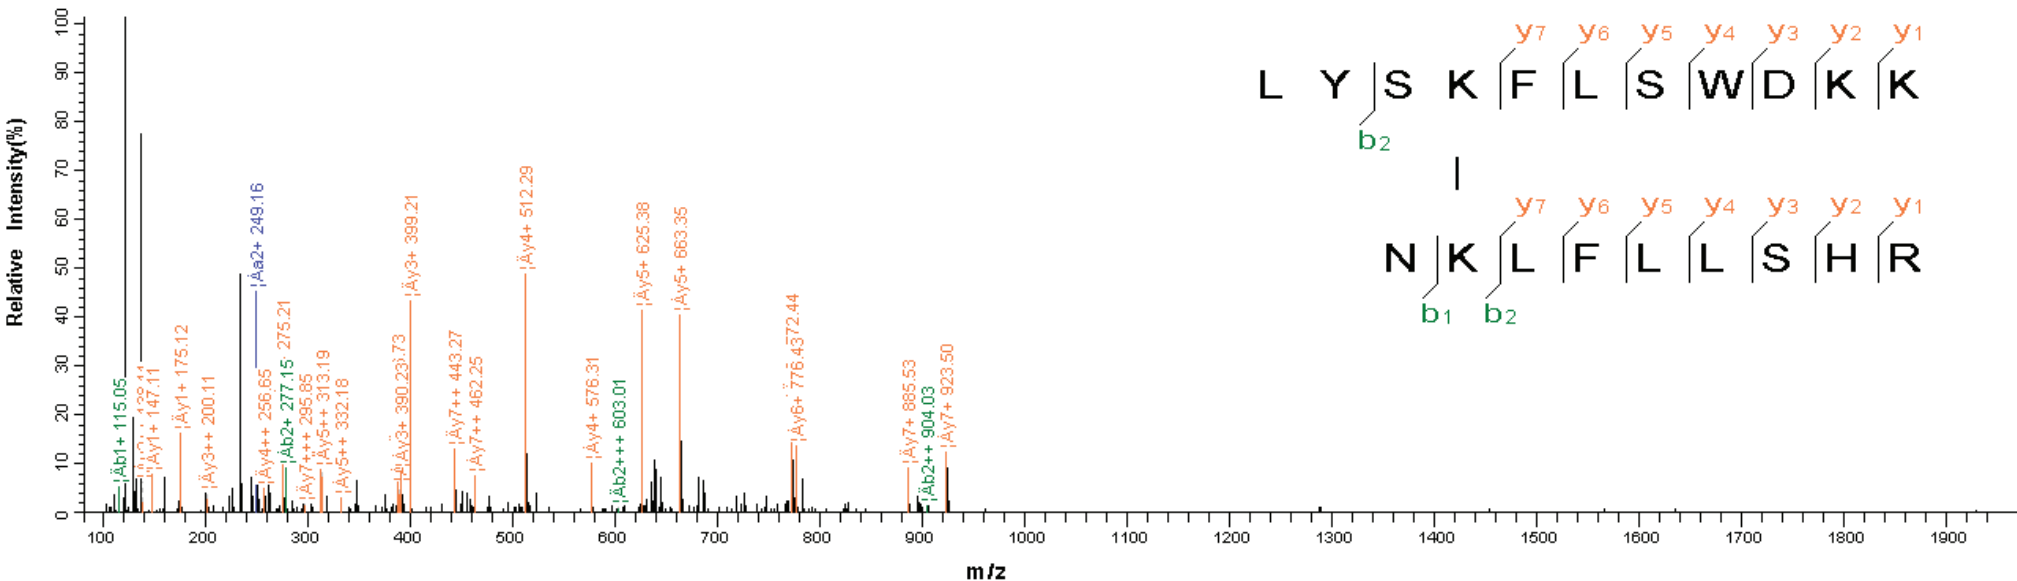

2.7e+003 PC\_A8\_140201121226.008076.008076.5.dta Seq: GGINSASGNKTDILQDFQLVLFPPSDKDK-KVSLQR Charge: 5

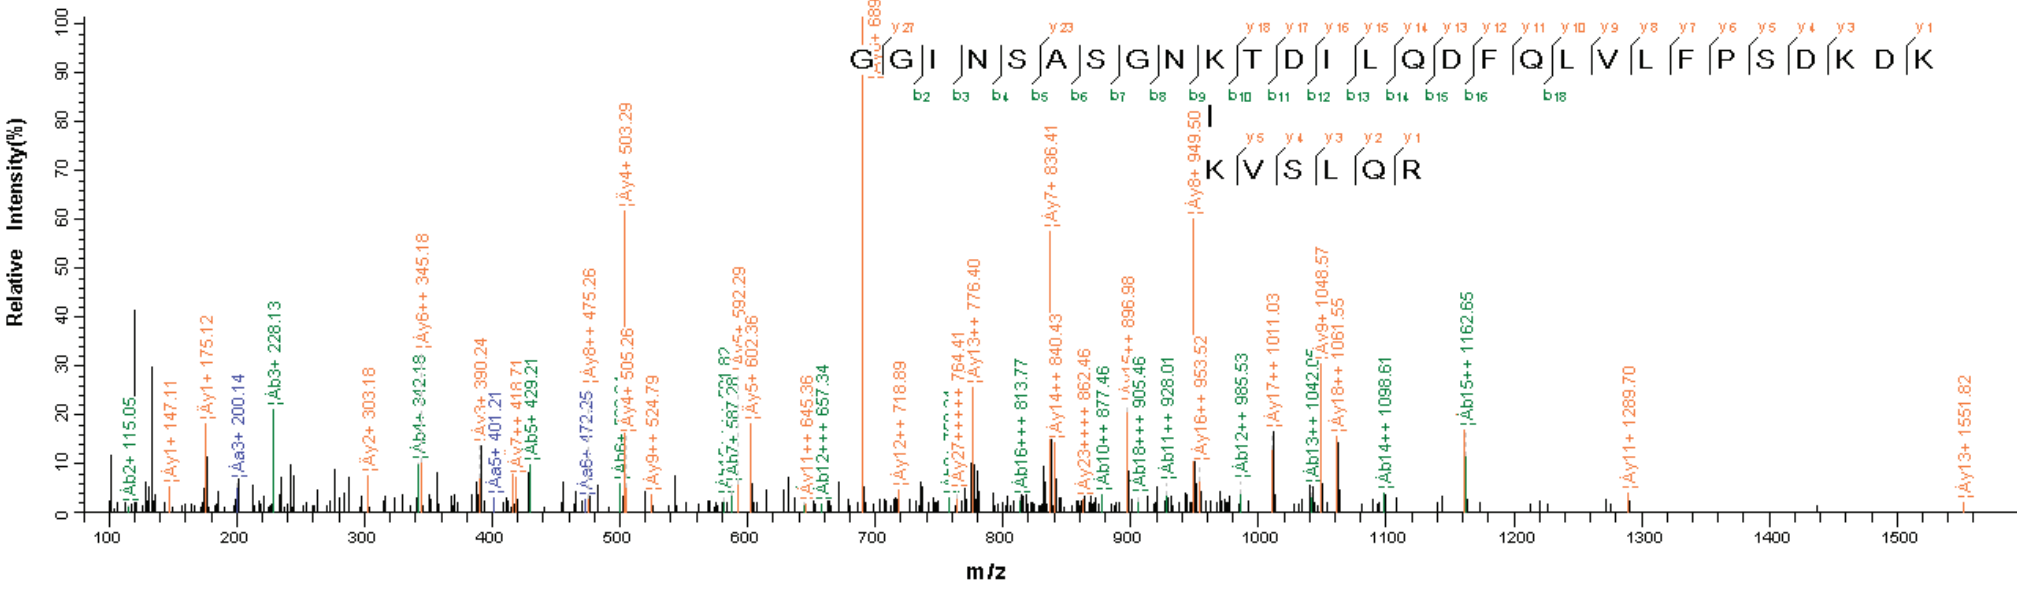

GGINSASGNKTDILQDFQLVLFPPSDKDK-KVSLQR  
 b2 b3 b4 b5 b6 b7 b8 b9 b10 b11 b12 b13 b14 b15 b16 b18  
 y1 y2 y3 y4 y5 y6 y7 y8 y9 y10 y11 y12 y13 y14 y15 y16 y17 y18 y23  
 K V S L Q R

2.1e+003 PC\_A9\_140131205754.005011.005011.4.dta Seq: SGGISKDLR-KALEVVK

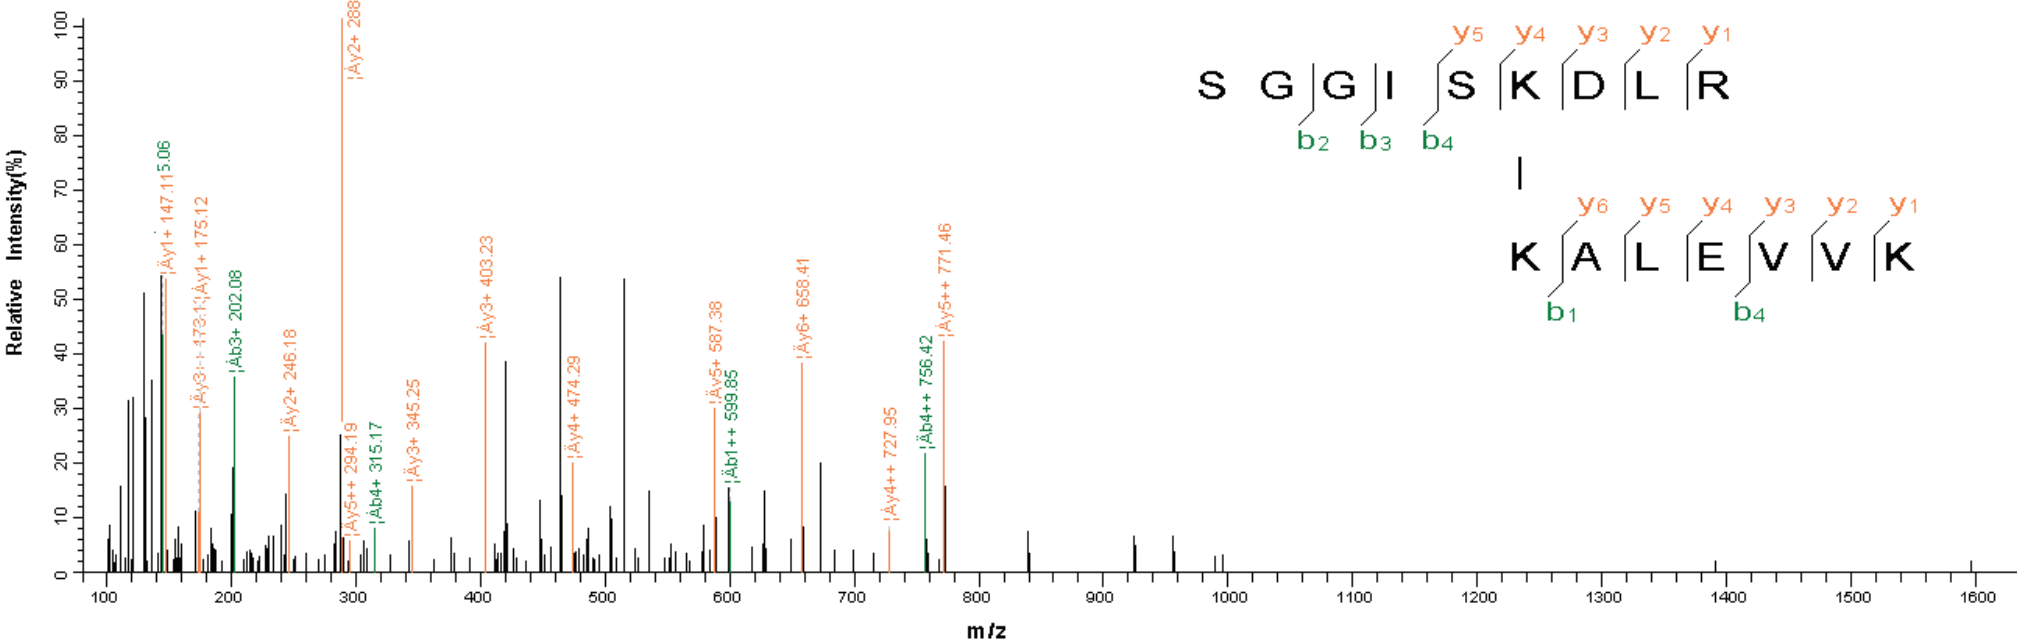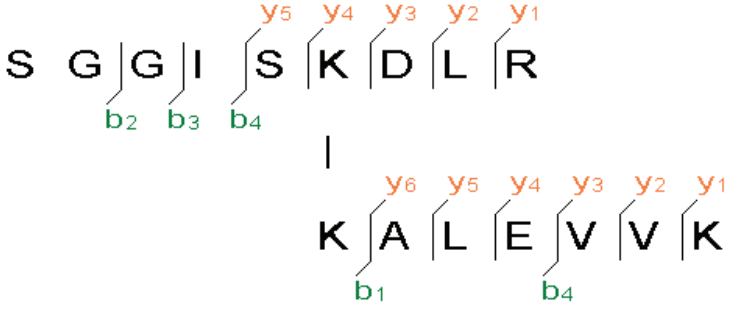



PC\_A9\_140131205754.004139.004139.4.dta Seq: TGNKVEAIK-SDSKEVLK

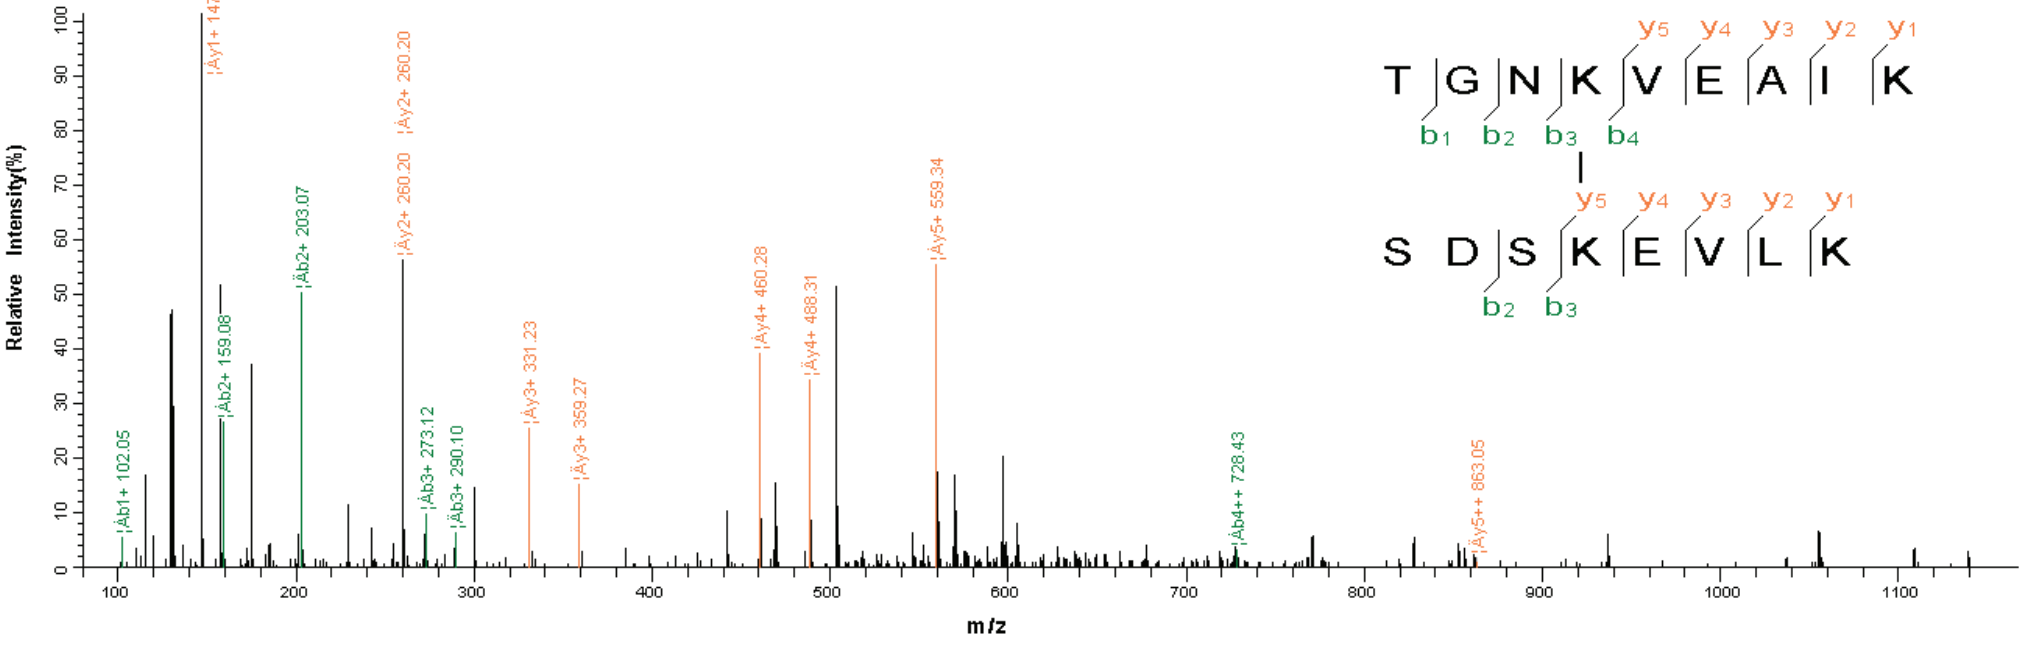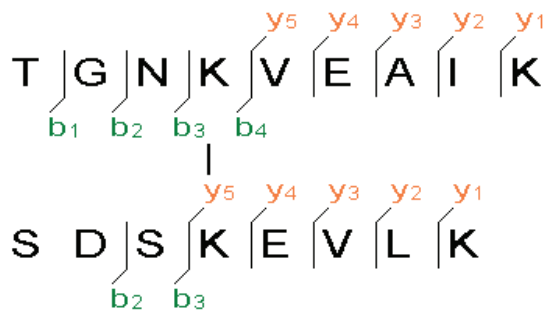

1.1e+003 PC\_A9\_140131205754.005058.005058.4.dta Seq: SIKASQTV DQNTSIYYR-DKASLNK

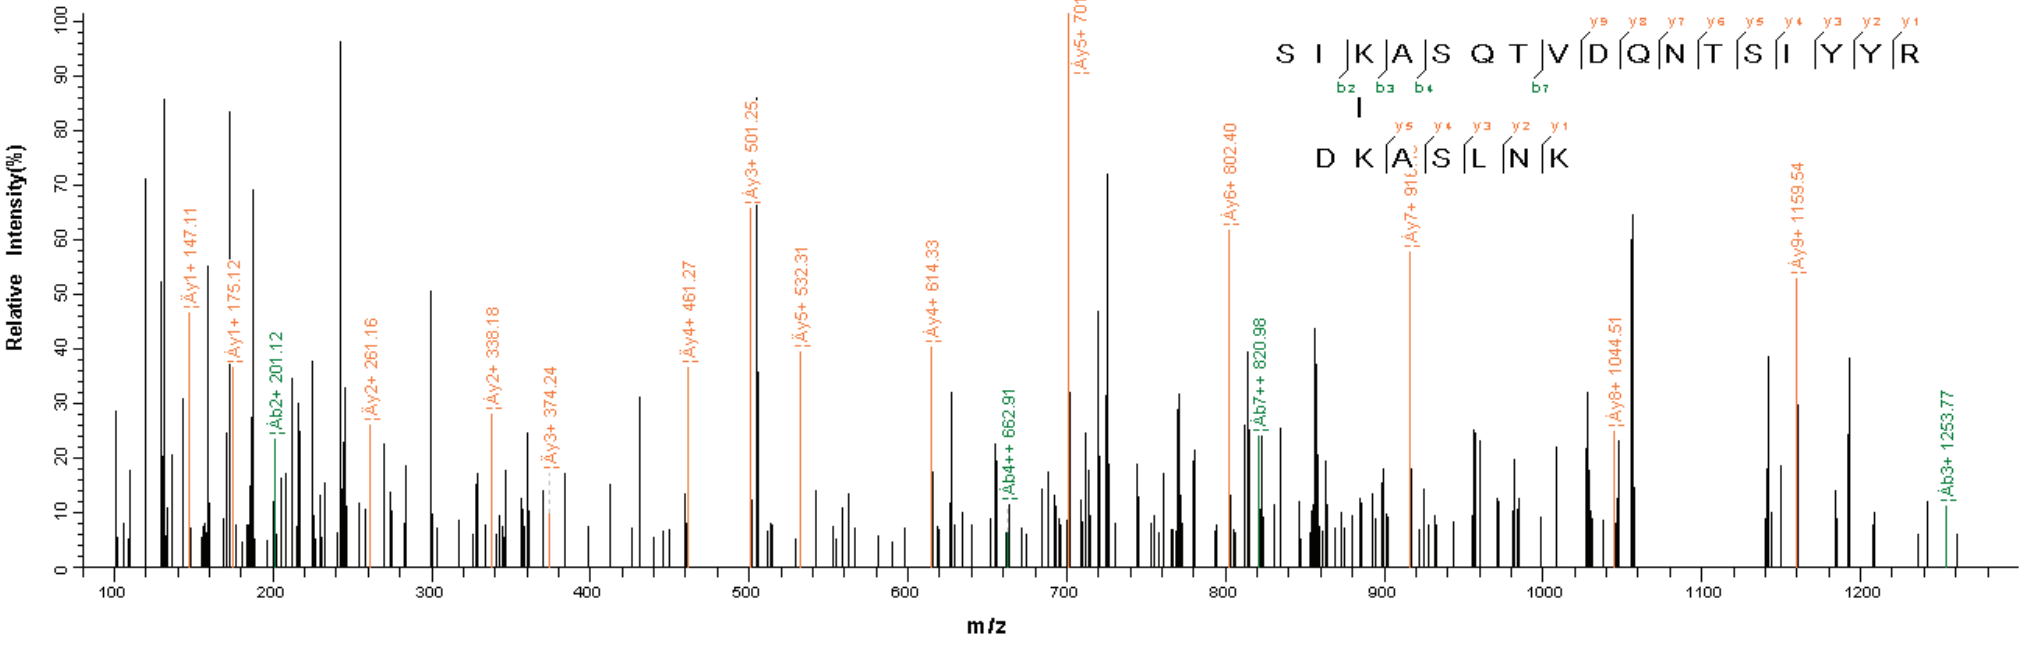

S I K A S Q T V D Q N T S I Y Y R  
bz b3 b4 b7  
y9 y8 y7 y6 y5 y4 y3 y2 y1  
D K A S L N K  
y5 y4 y3 y2 y1

PC\_A9\_140131205754.003805.003805.4.dta Seq: TKYFQ GK-DKASLNK

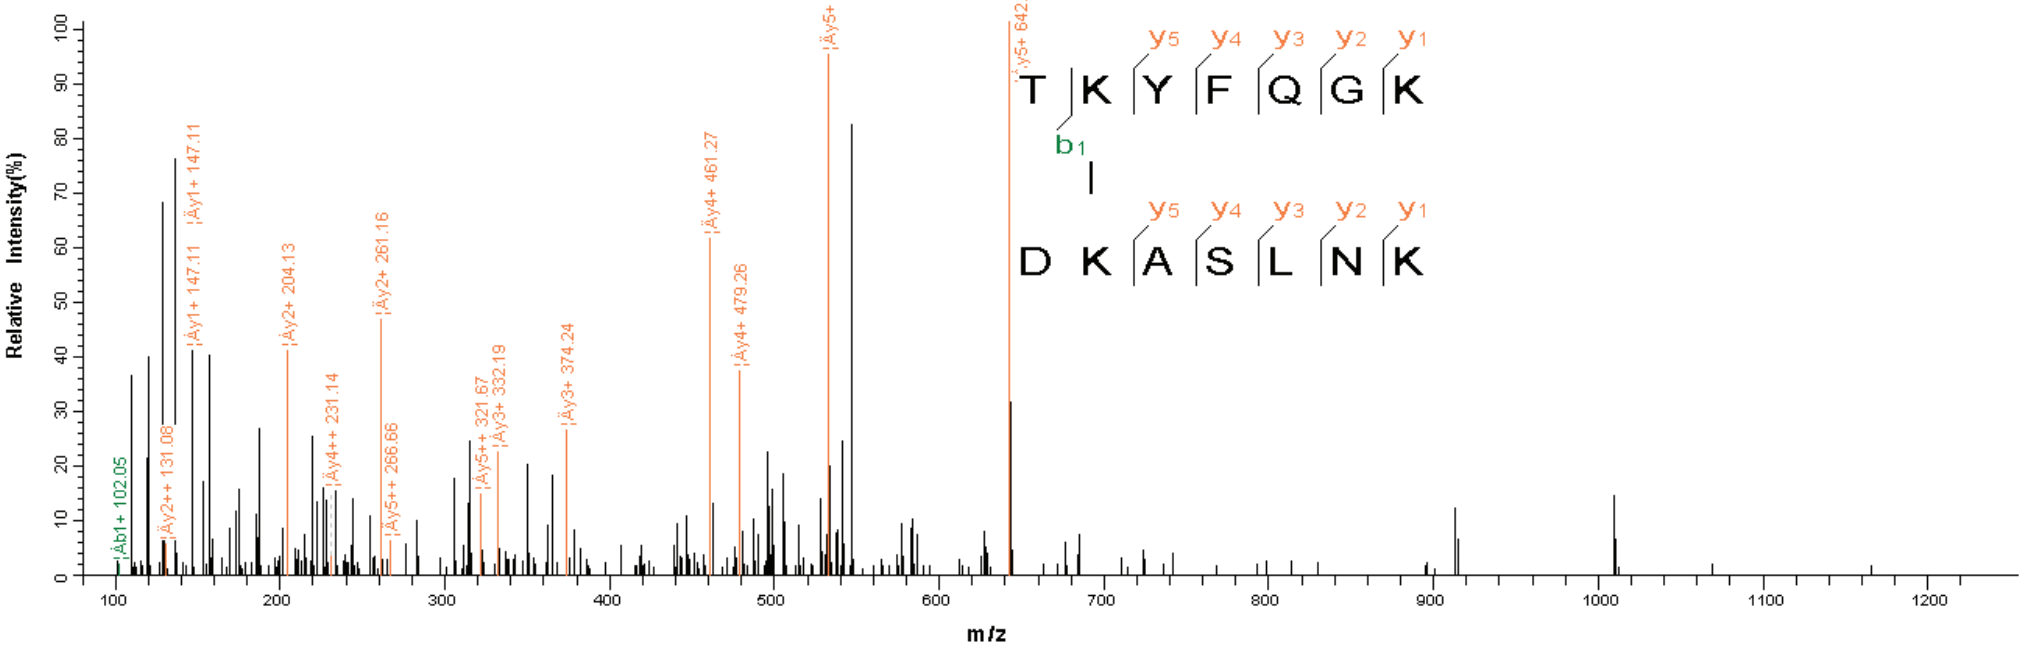

6.2e+003 PC\_A9\_140131205754.004865.004865.4.dta Seq: SQPSLYSKTNK-IKNIK

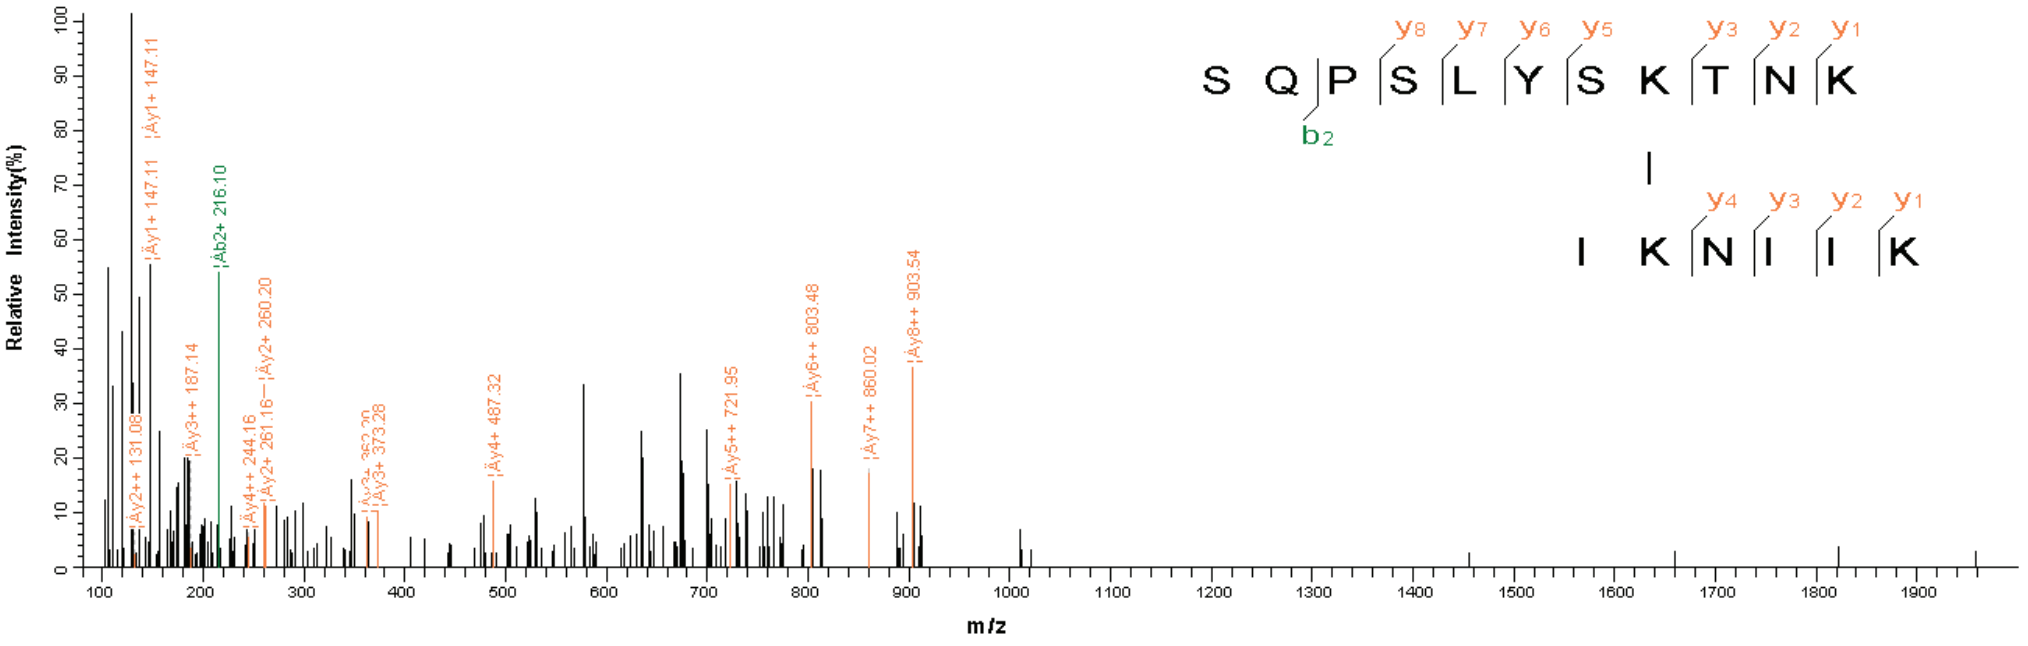

1.2e+004 PC\_A9\_140131205754.003399.003399.4.dta Seq: INKFCEDNMSR-KAAESK Mod: 5,C\_57

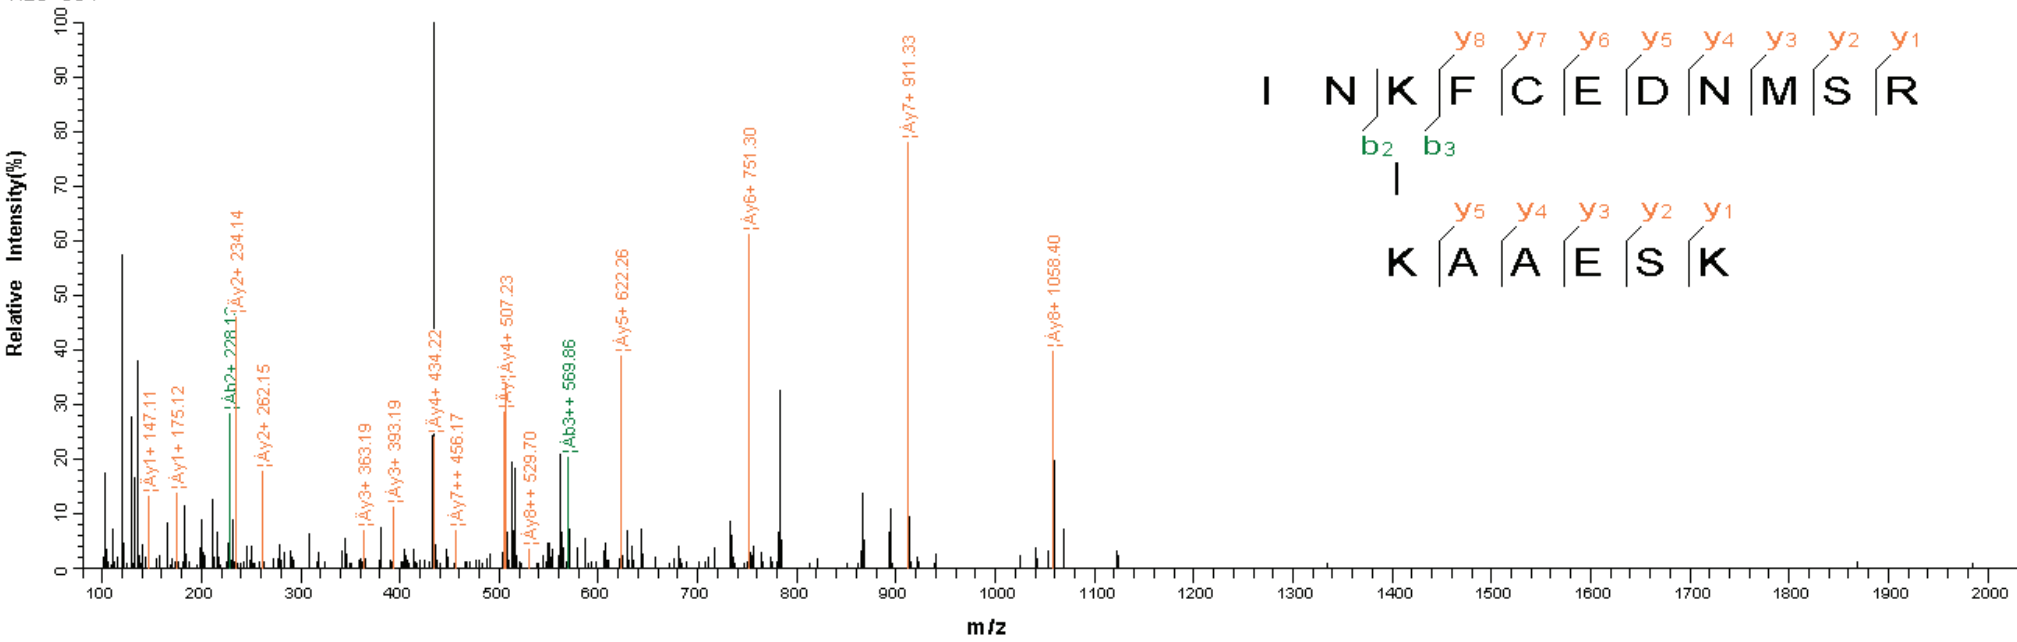

PC\_A9\_140131205754.003758.003758.4.dta Seq: NTQTPKNPAINSK-NIRFK

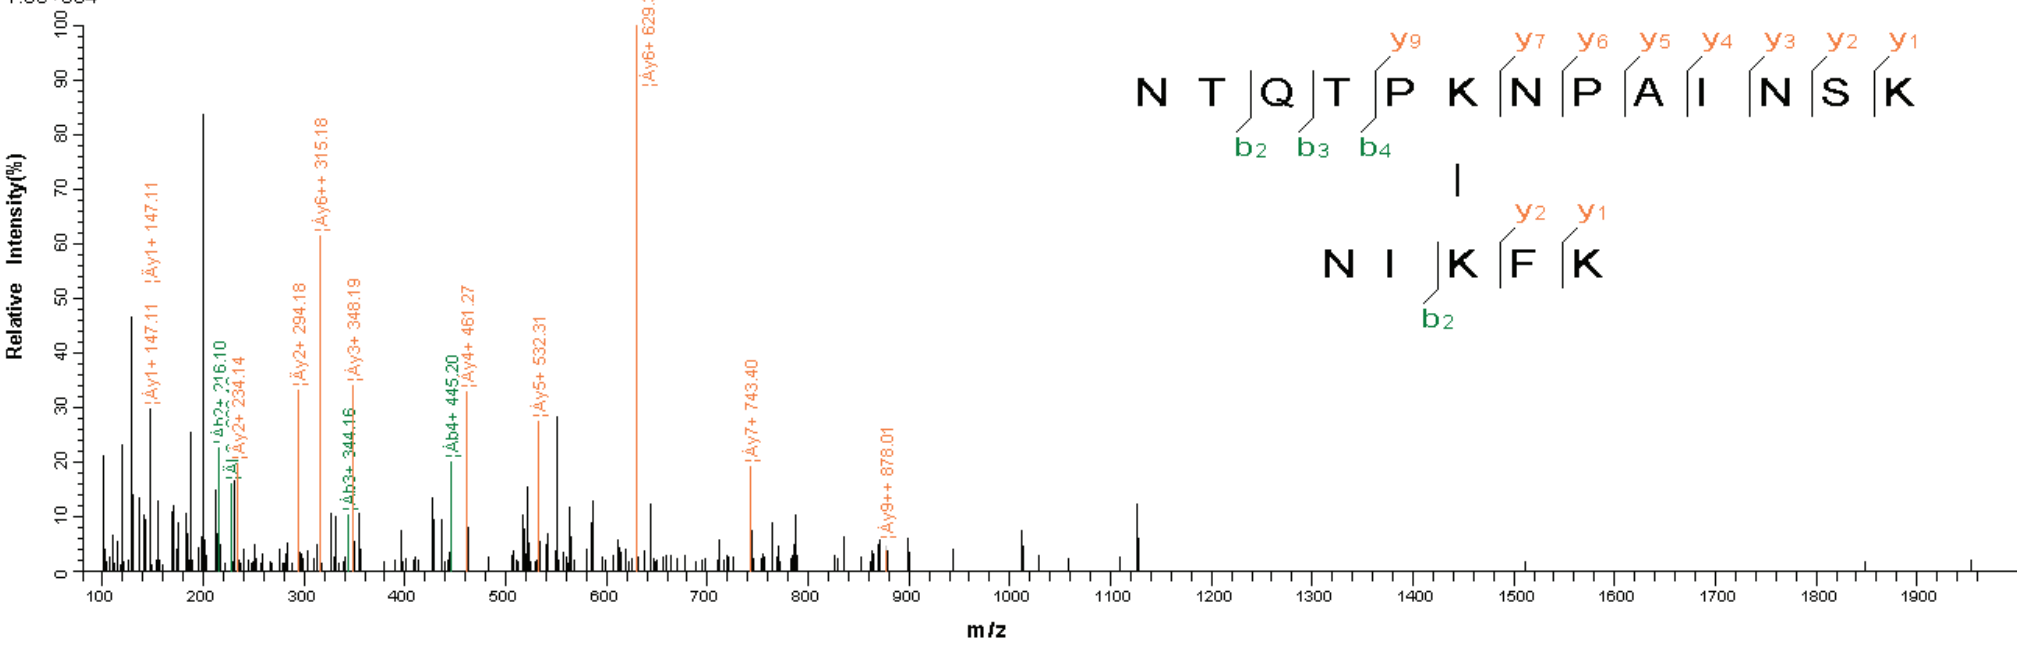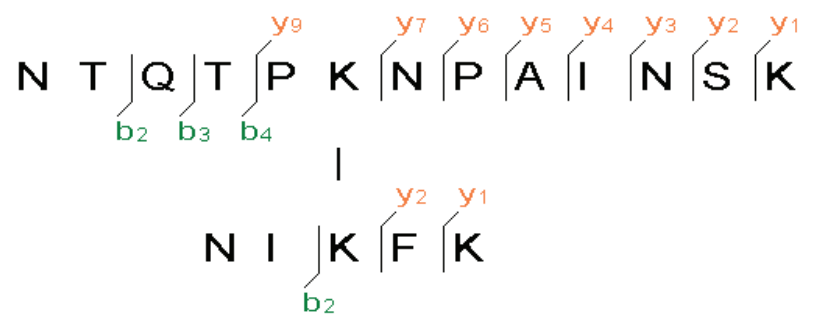

PC\_A9\_140131205754.005899.005899.4.dta Seq: GKLYFAQNNFNK-SGGISKDLR

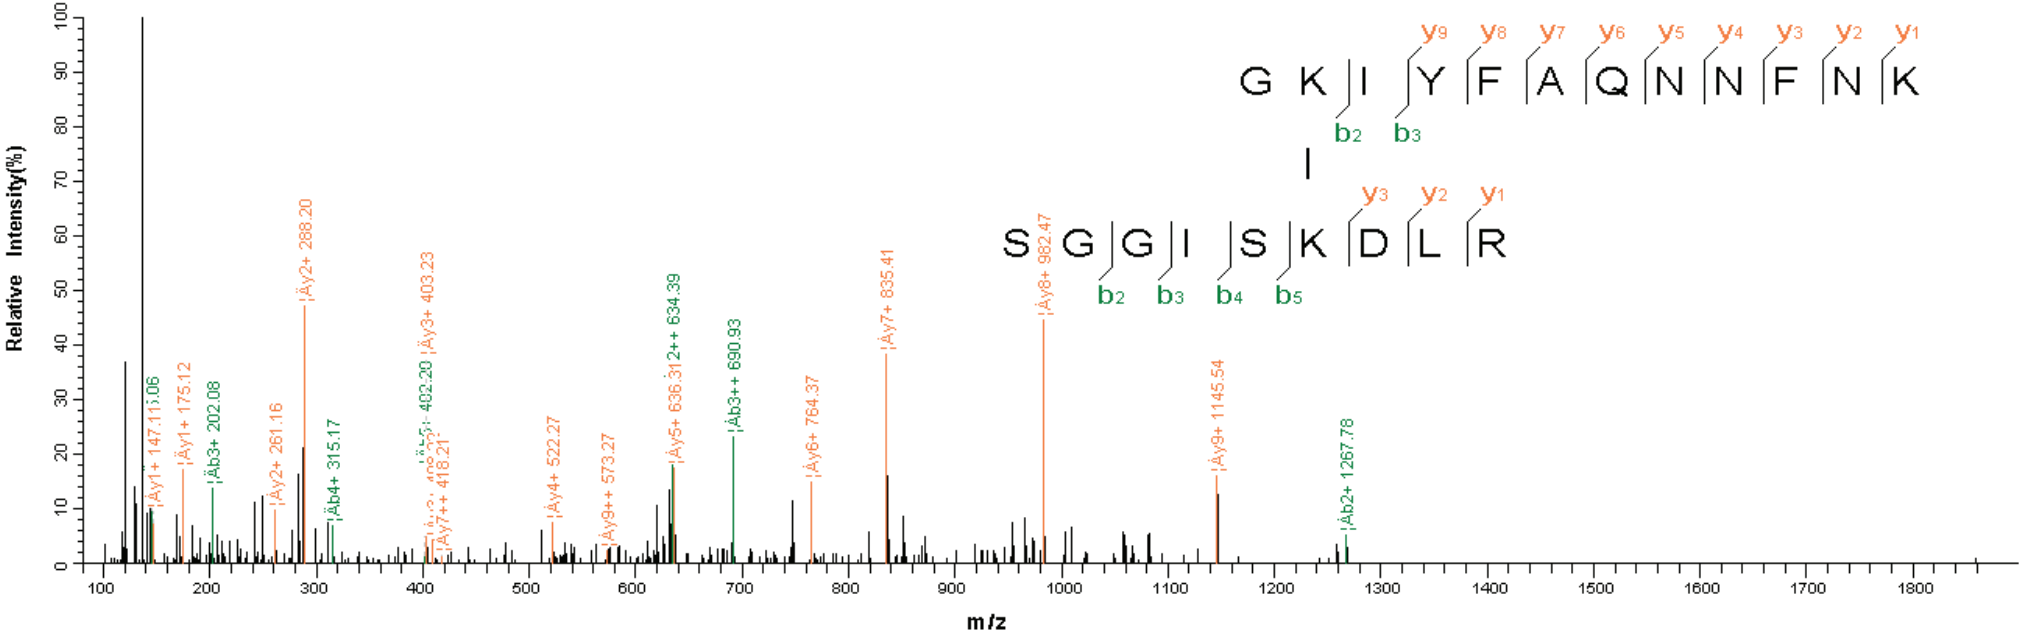

6.5e+003 PC\_A9\_140131205754.005364.005364.4.dta

Seq: IYFAQNNFNKAR-KTGLDAAGNSQK

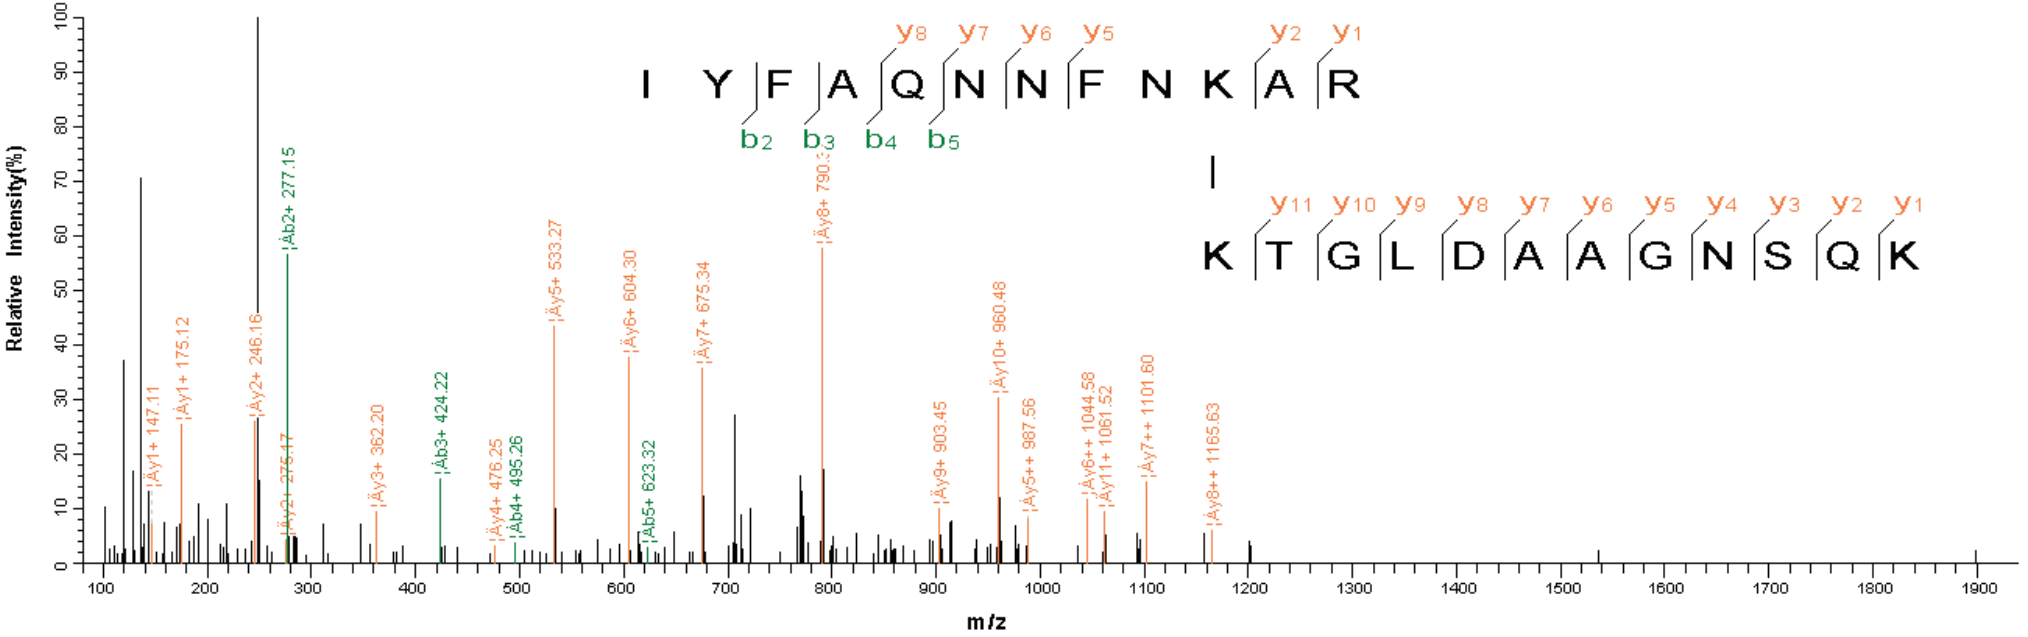



PC\_A9\_140131205754.002823.002823.6.dta Seq: KLQKAIDHLHK-QEKNISK

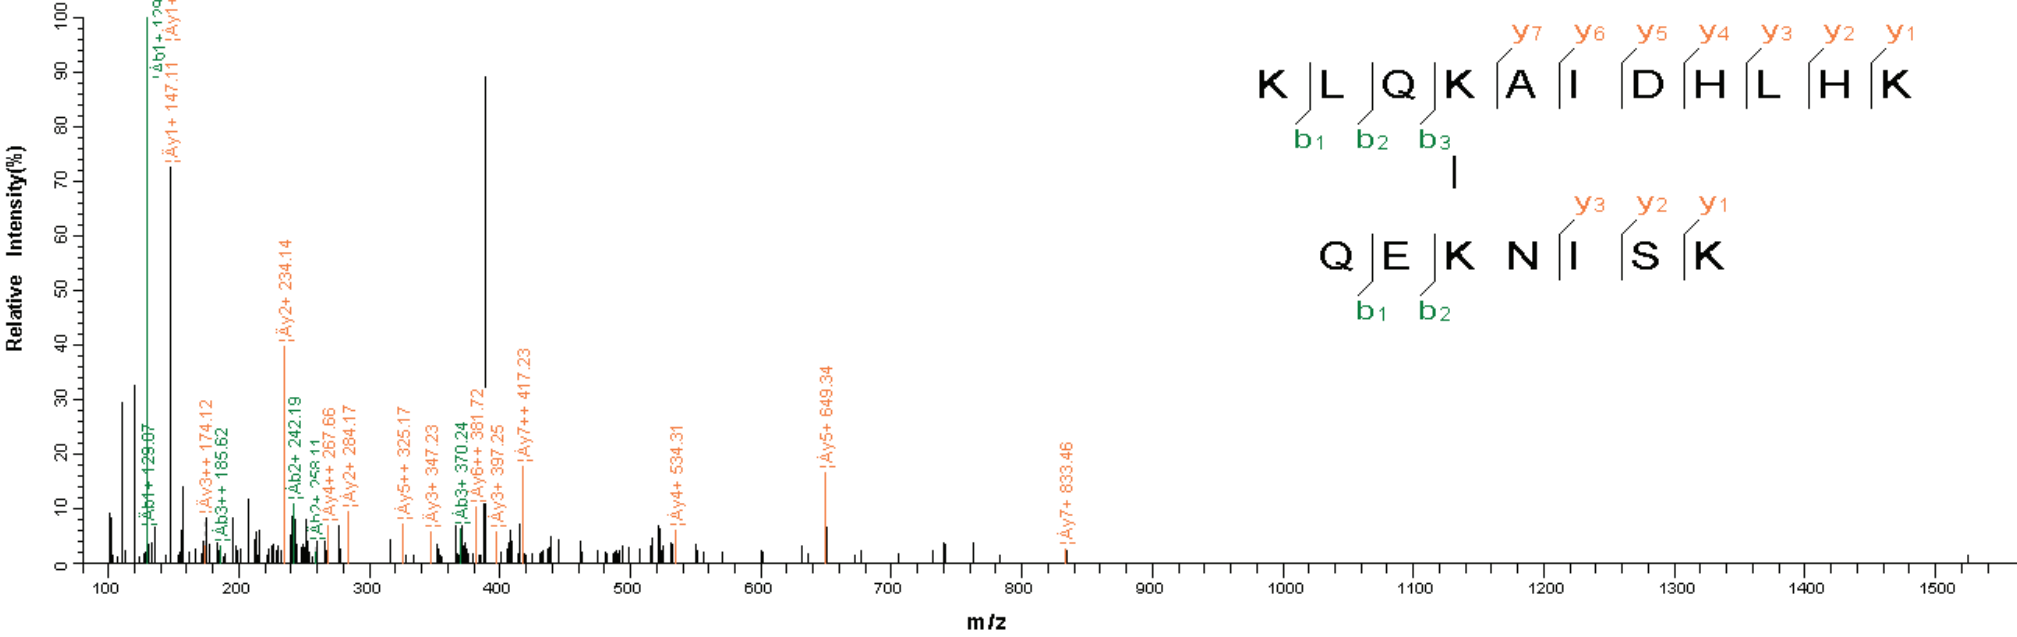

APC\_A9\_140131205754.004322.004322.4.dta Seq: LKQQLNIEK-DKASLNK

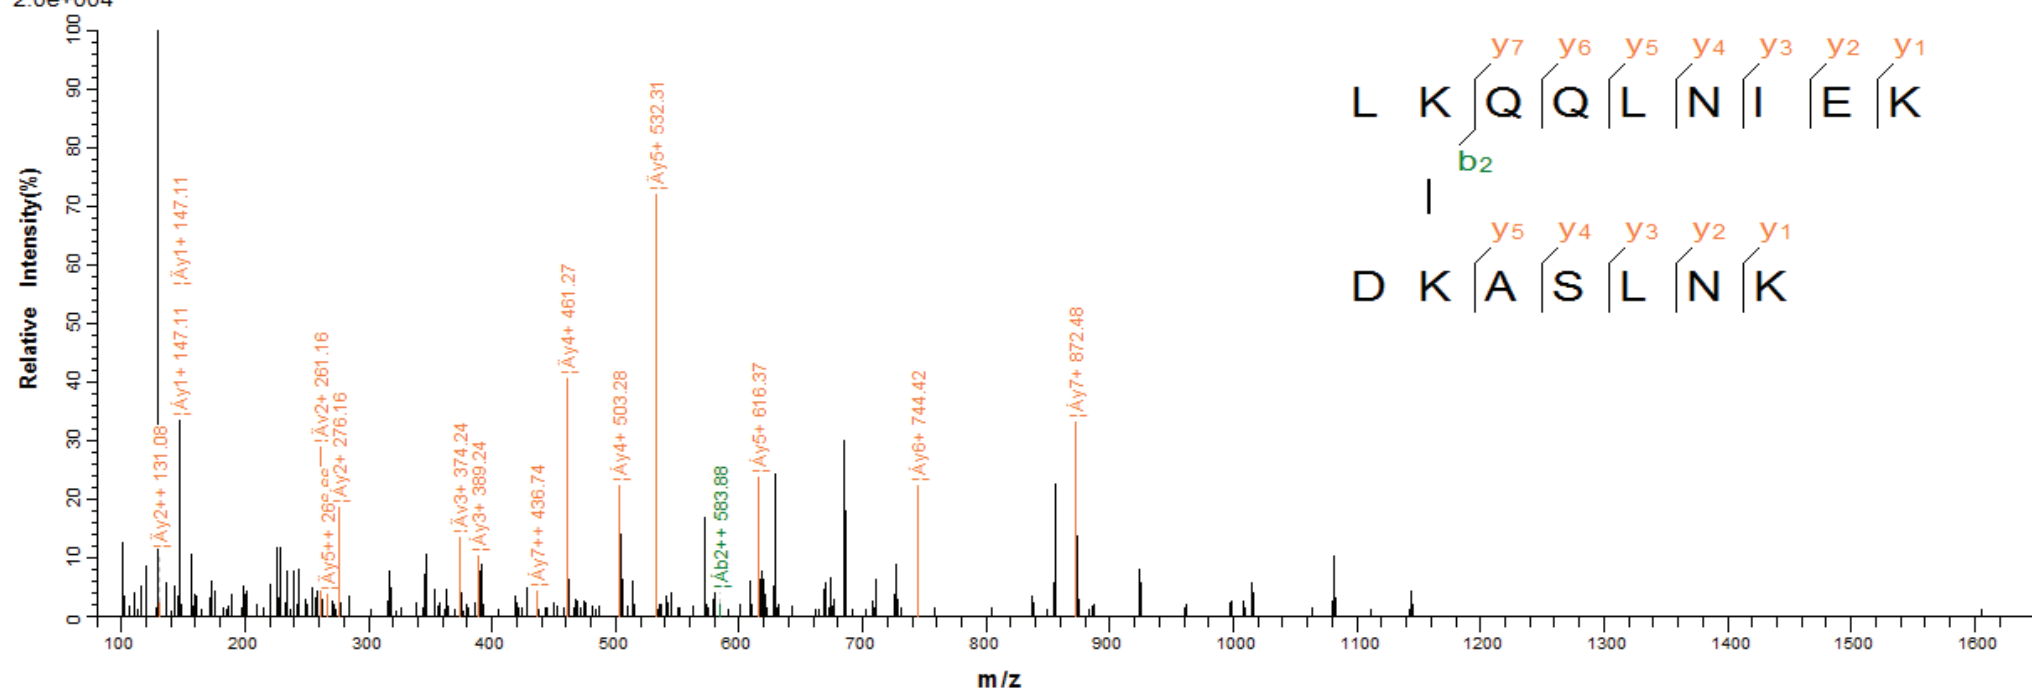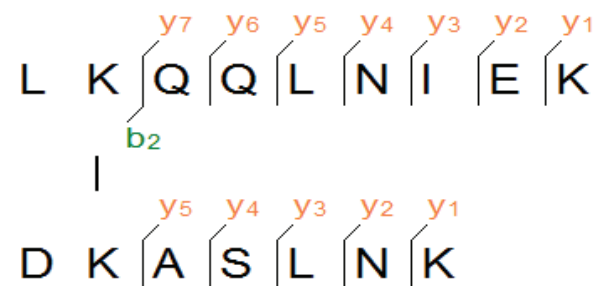

APC\_A9\_140131205754.003495.003495.5.dta Seq: ANKDGSGNEDINQSGHQR-KLGWR

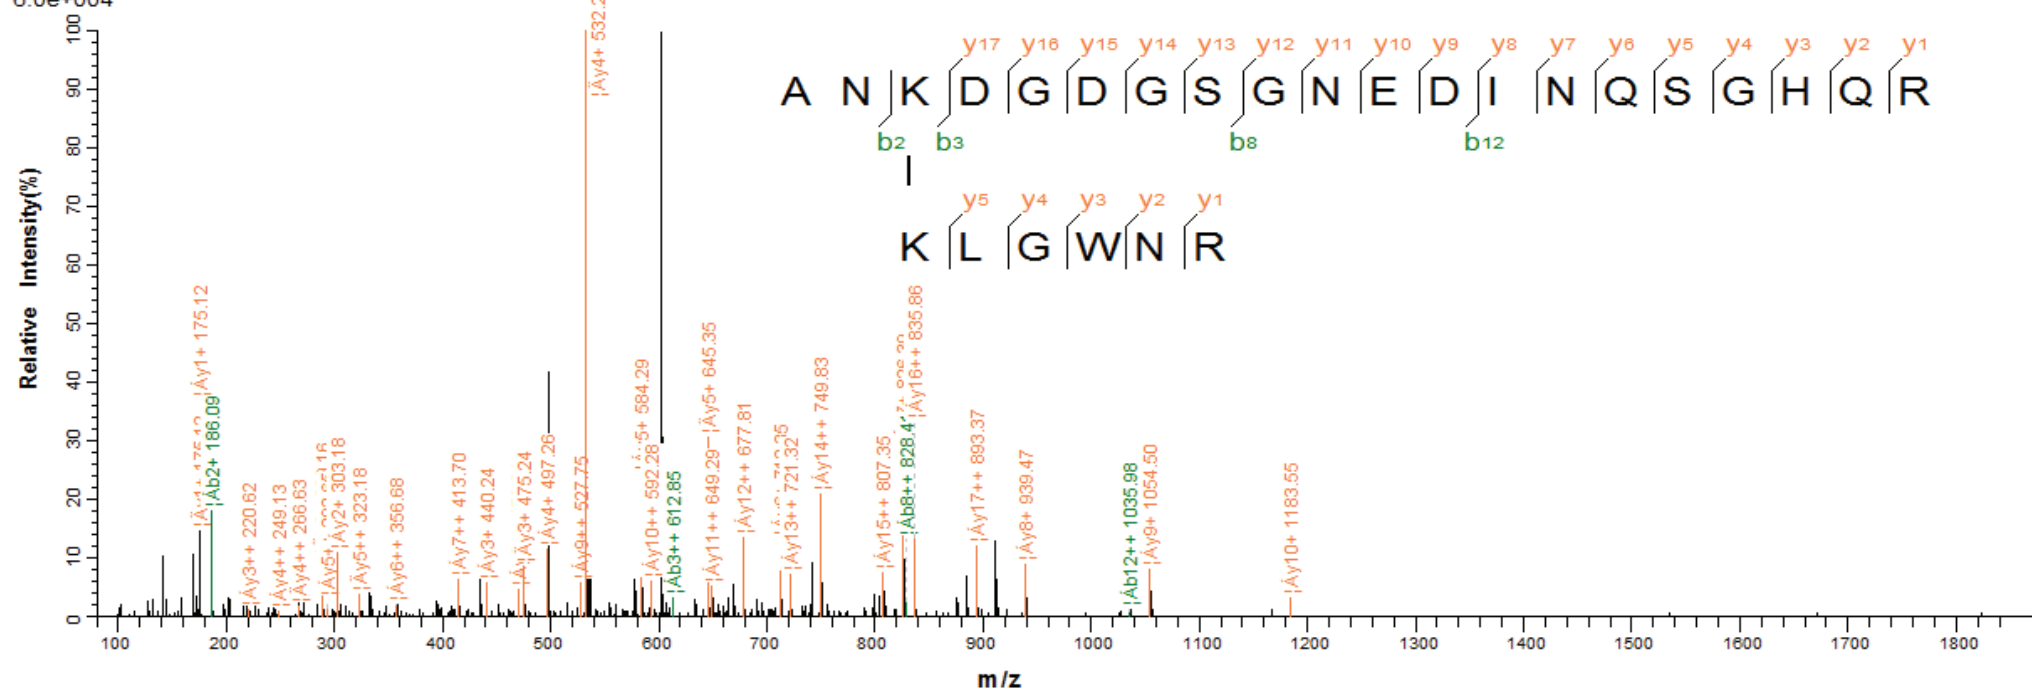

APC\_A9\_140131205754.004431.004431.4.dta Seq: QQLNIEKTK-TGNKVEAIK

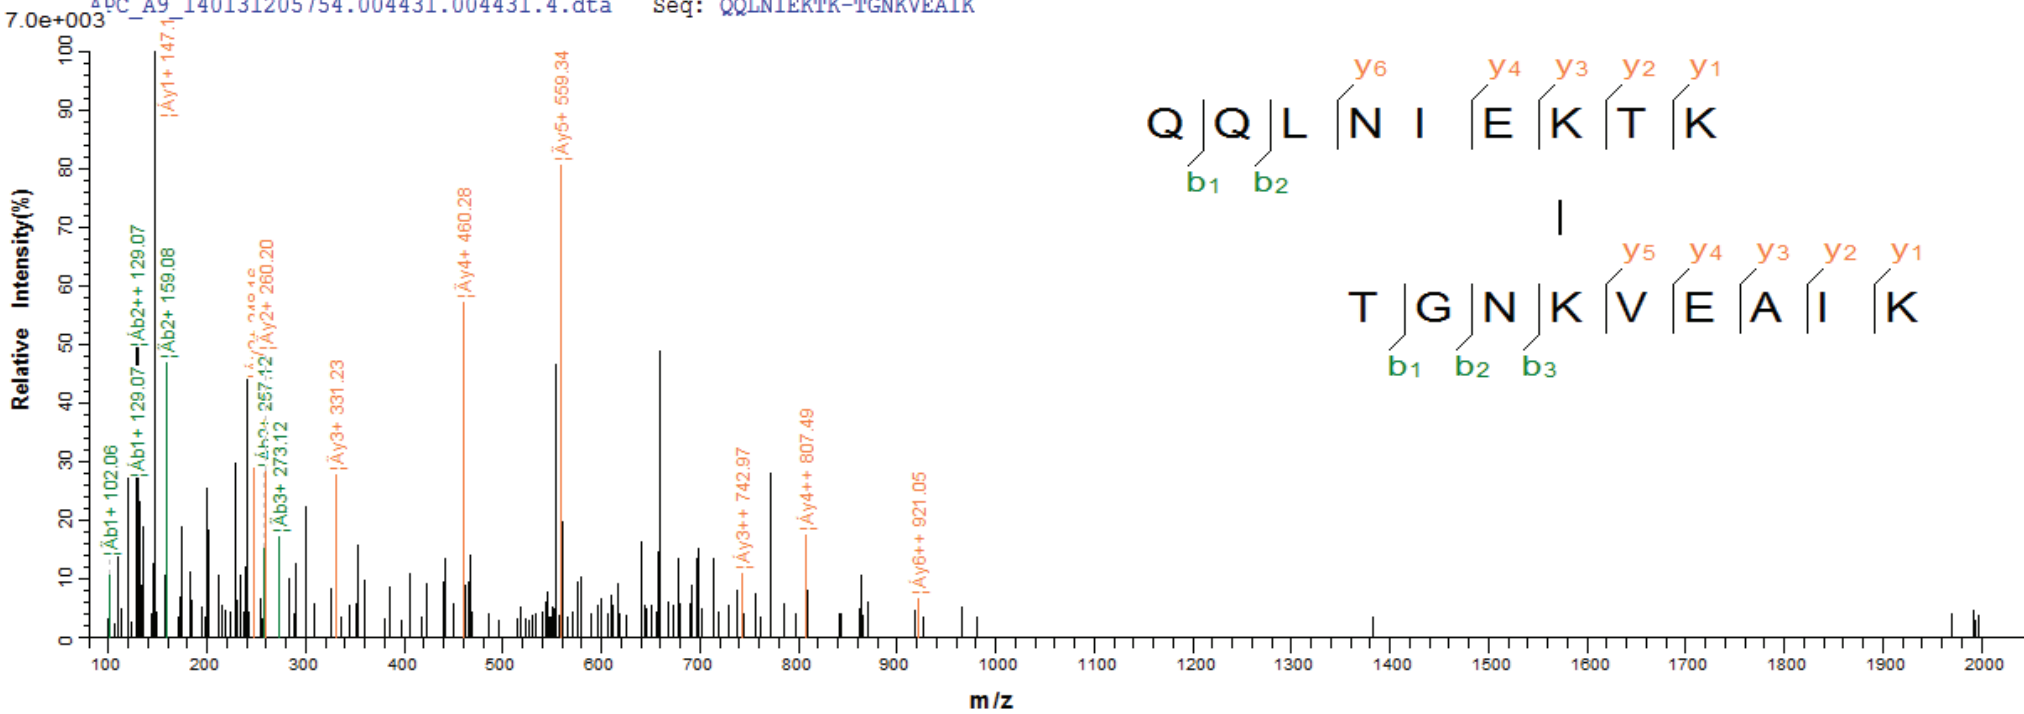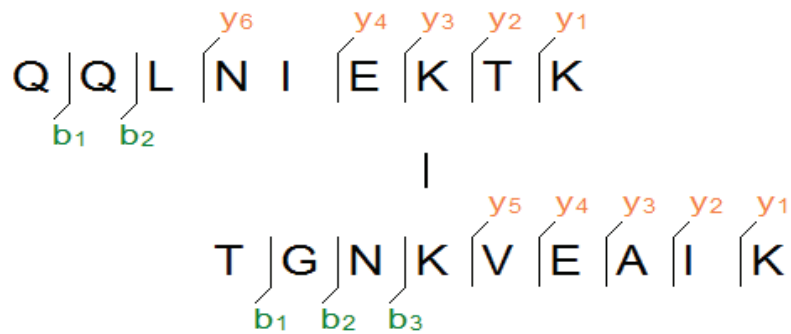

APC\_A9\_140131205754.004203.004203.4.dta Seq: TGNKVEAIK-TRYFQ GK

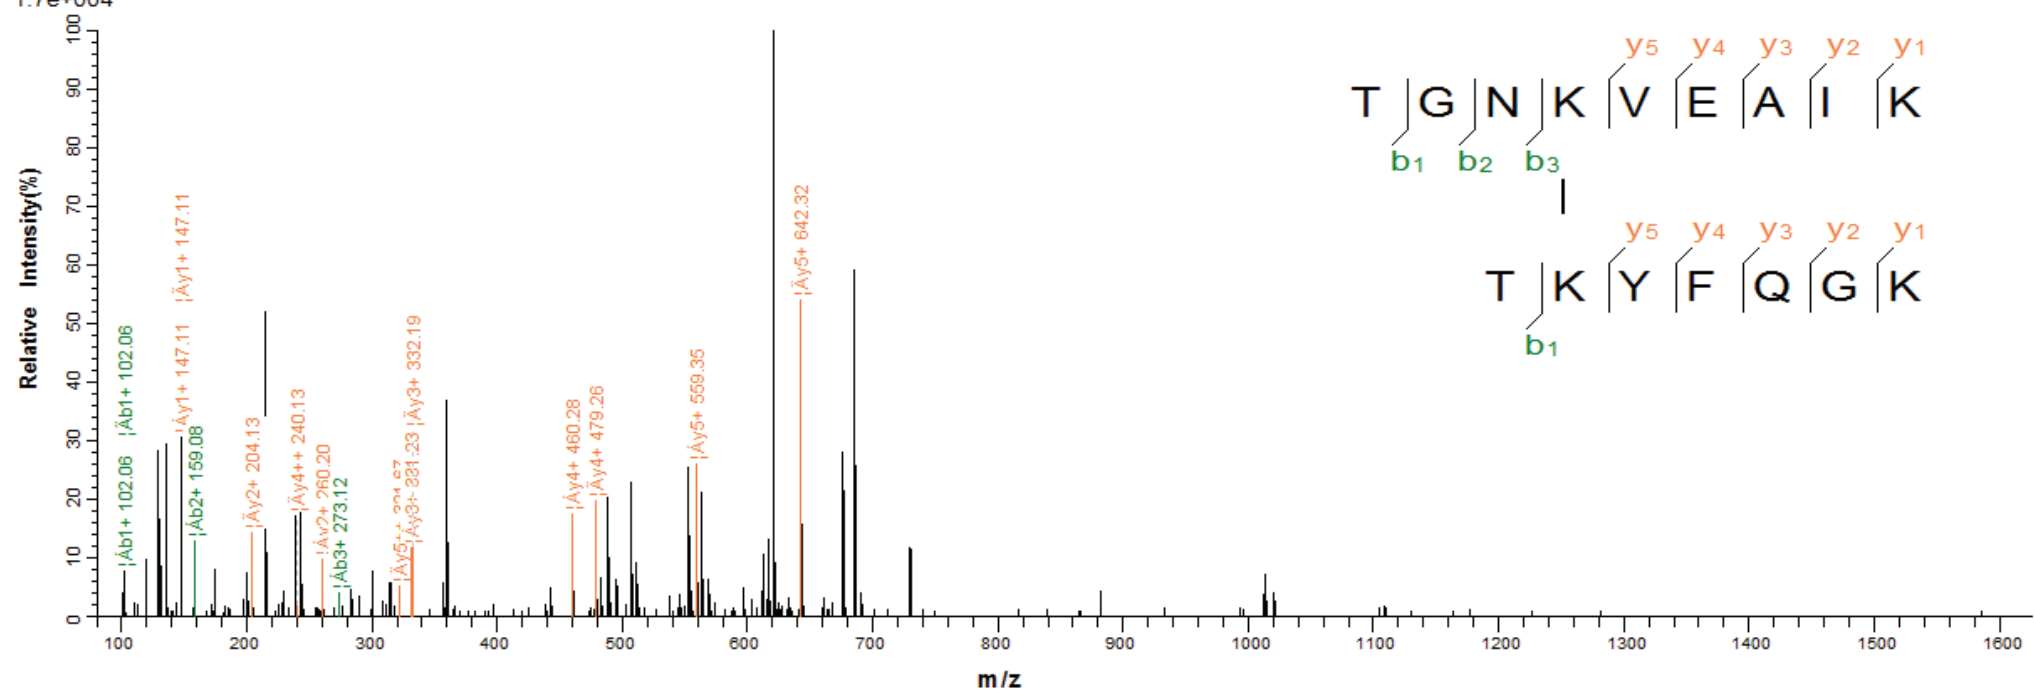

APC\_A9\_140131205754.004431.004431.4.dta Seq: QQLNIEKTK-TGNKVEAIK



4.1e+003 APC\_A9\_140131205754.004612.004612.4.dta Seq: ESAQGKALMTSEQNSENIR

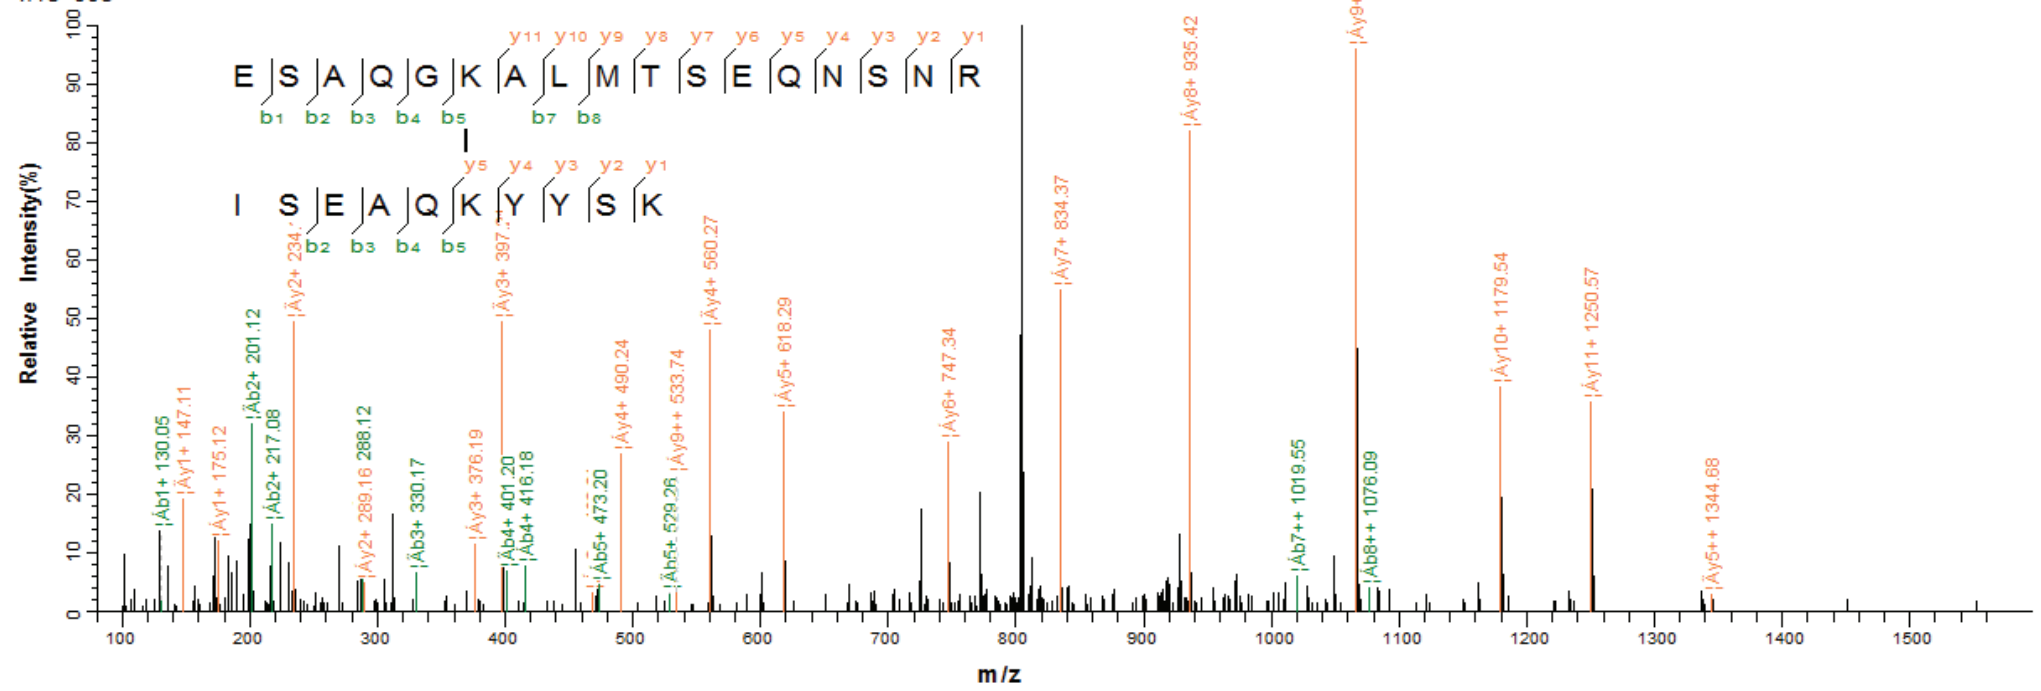

APC\_A9\_140131205754.001345.001345.5.dta Seq: KDQNSAGAKHER-FVKDSKR

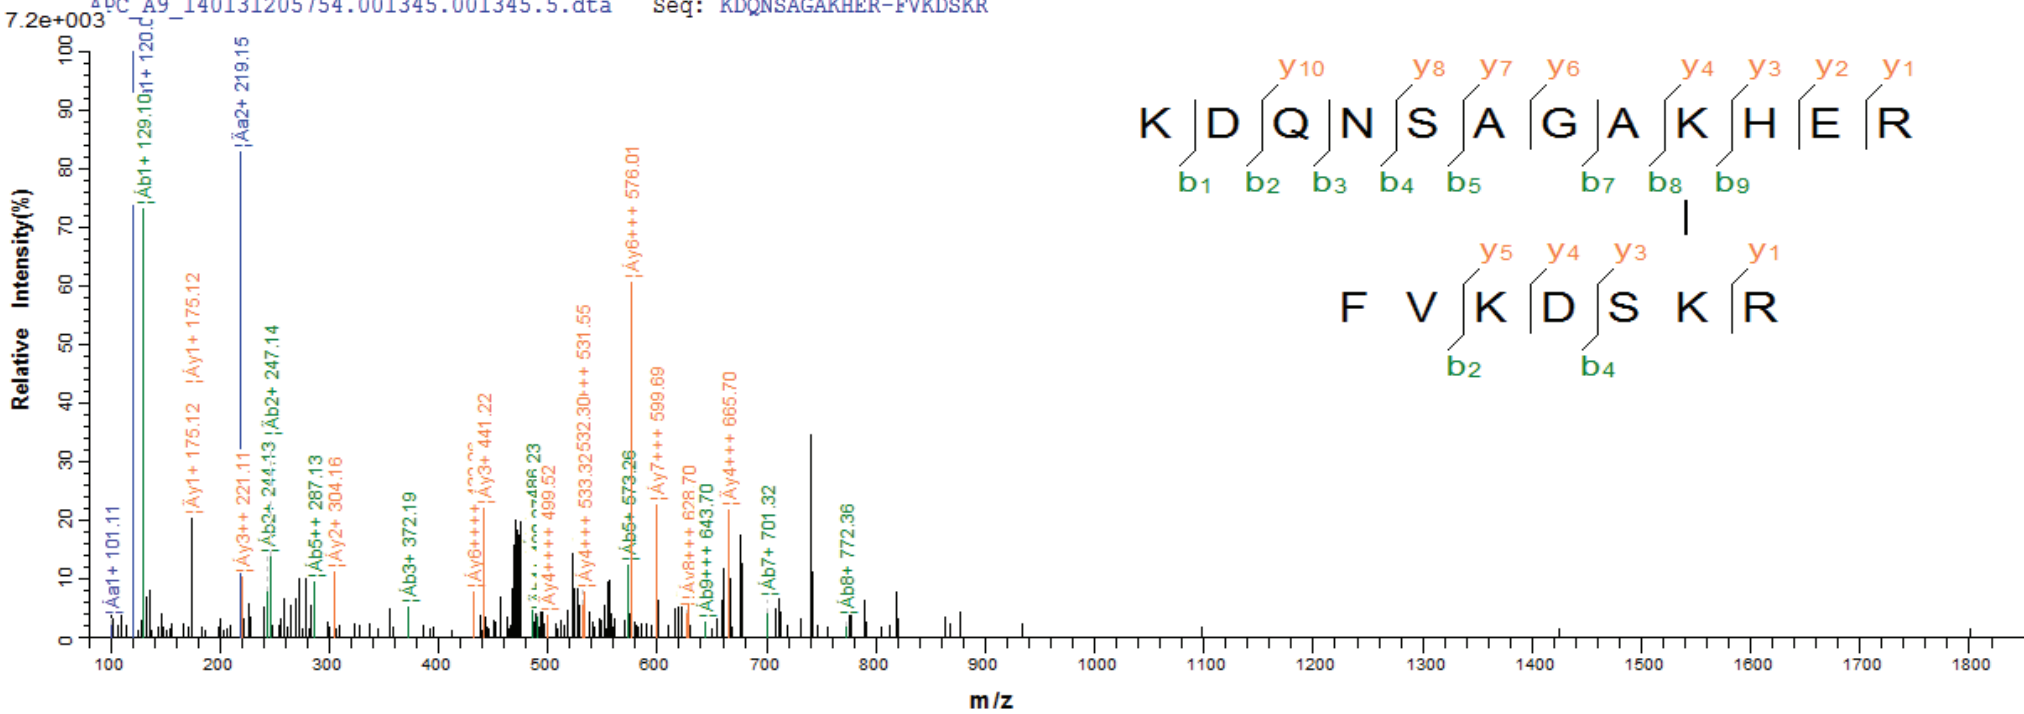



6.2e+003 APC\_A9\_140131205754.003785.003785.5.dta

Seq: TGLDAAGNSQKSGGISK-KFSLTR

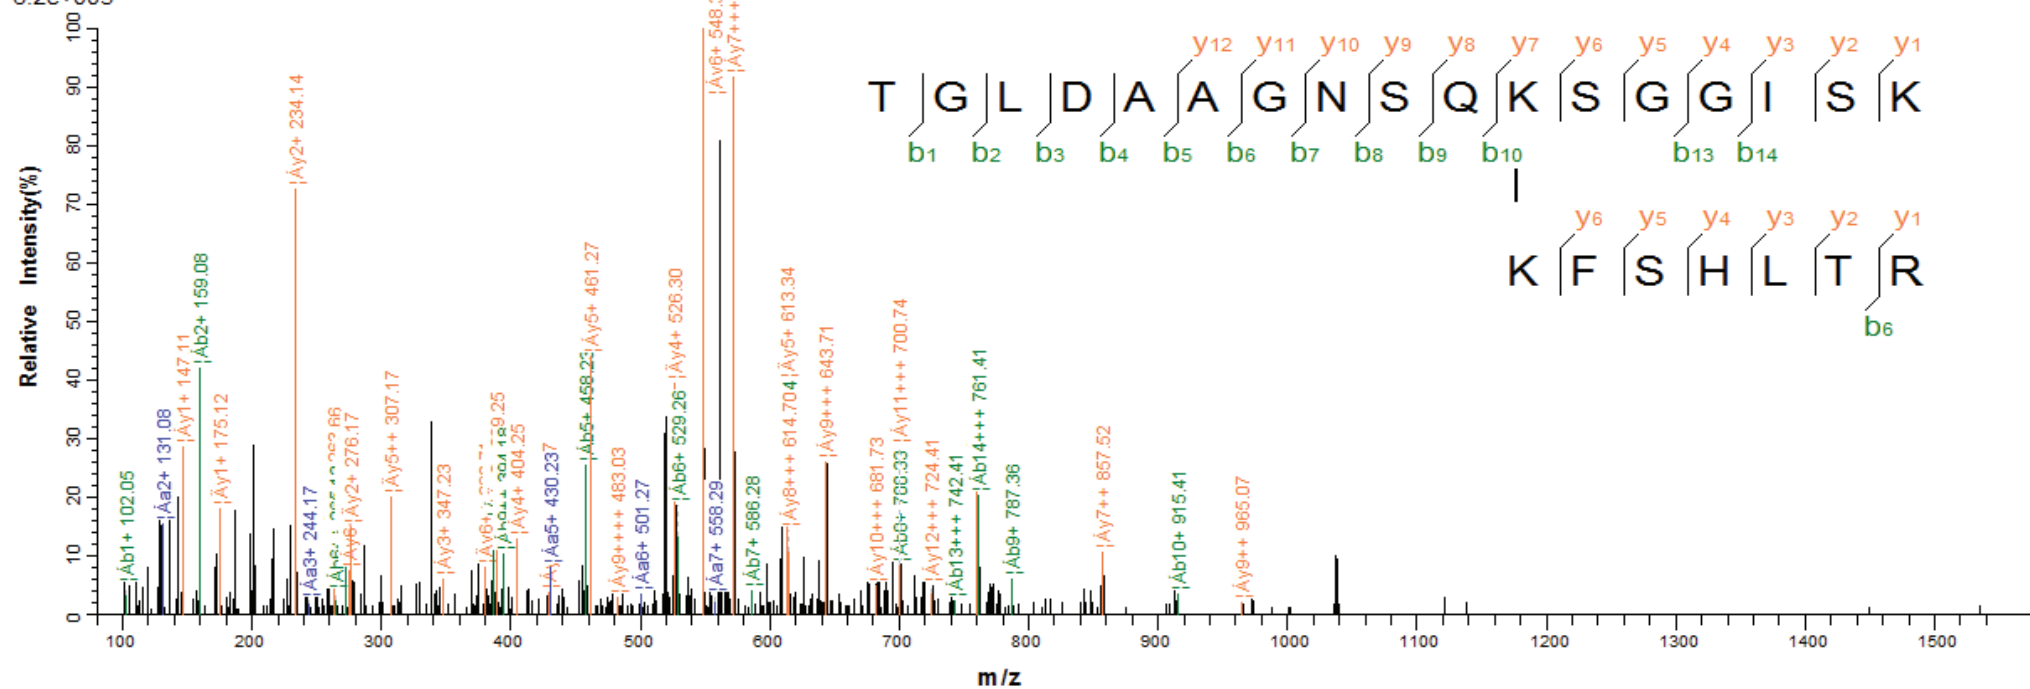

APC\_A9\_140131205754.004208.004208.4.dta Seq: SNEILAKDYK-NKQGVPK

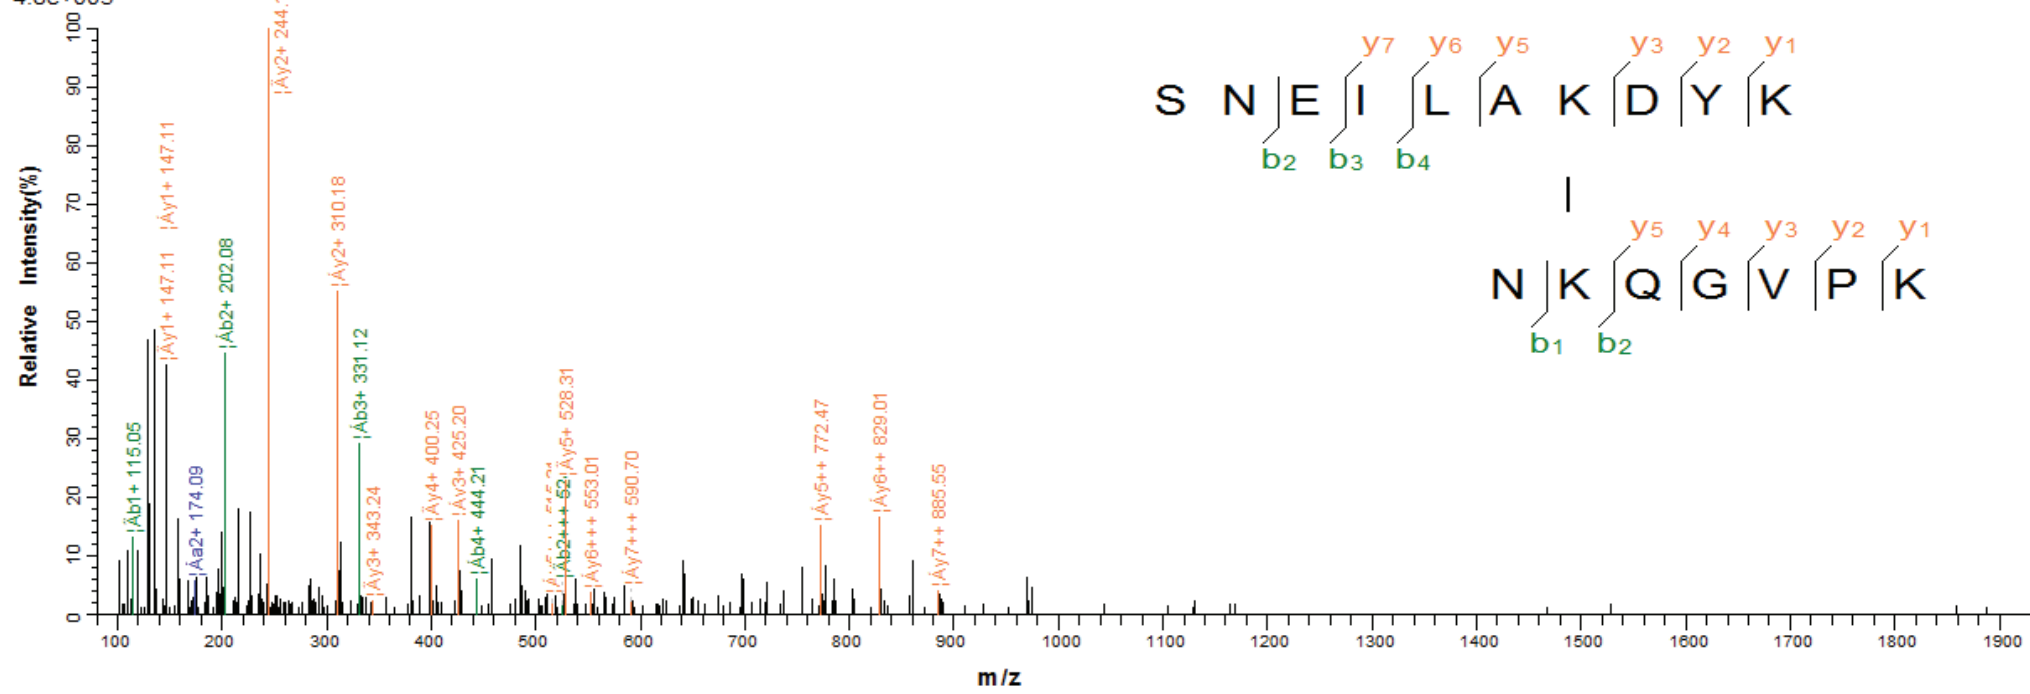

APC\_A9\_140131205754.003686.003686.4.dta Seq: SDSKEVLKR-TGNKVEAIK

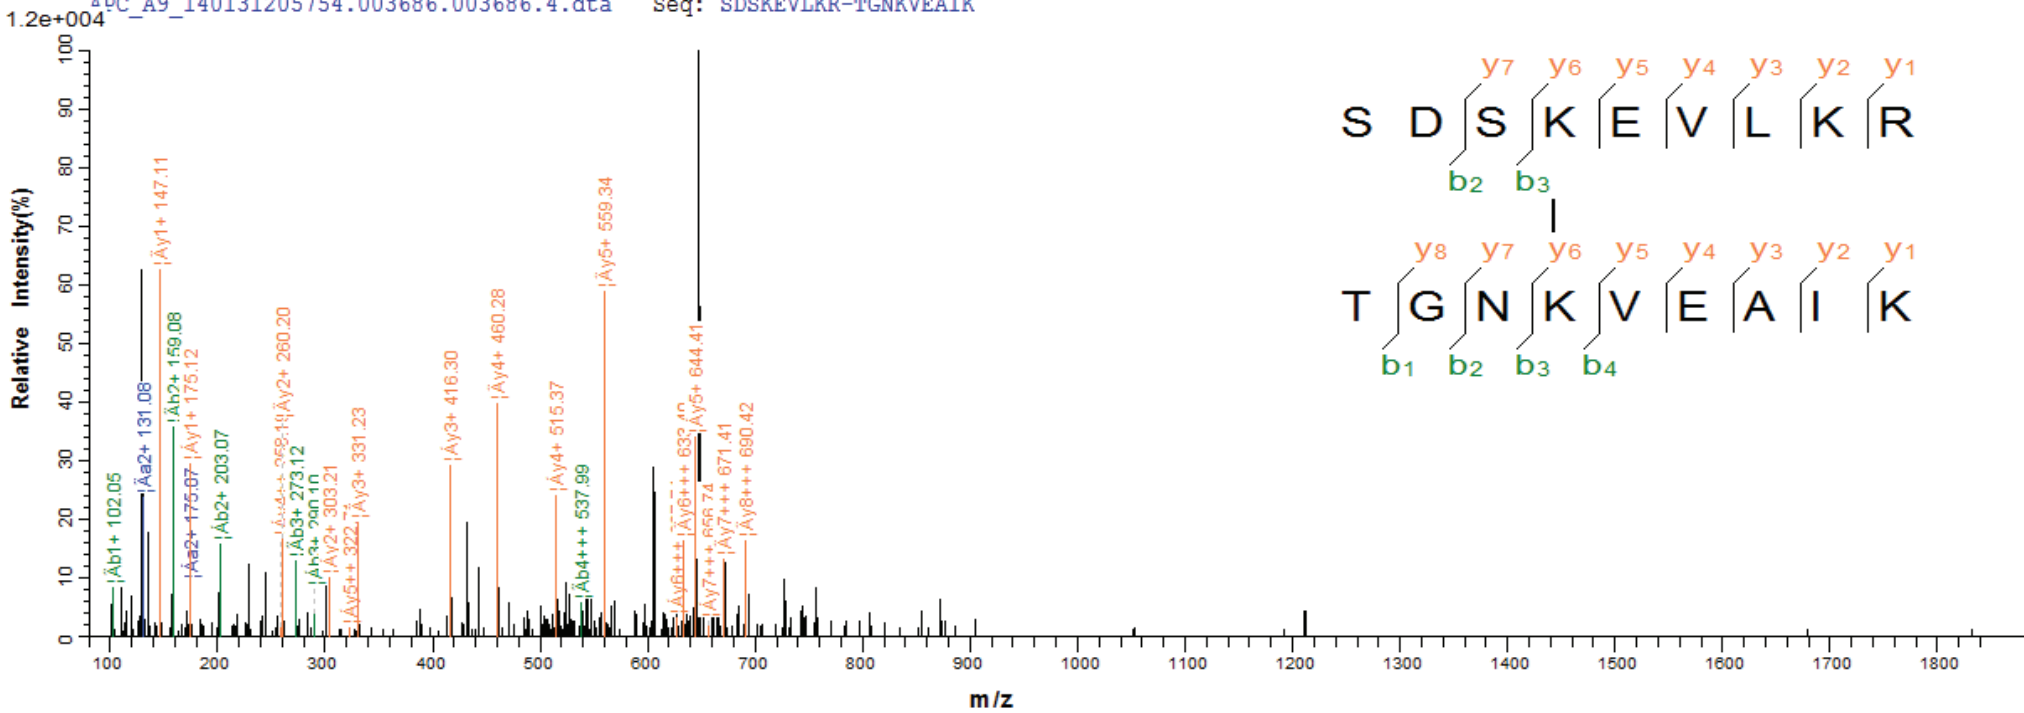

APC\_A9\_140131205754.002724.002724.4.dta Seq: DKASLNKK-LGYKEK

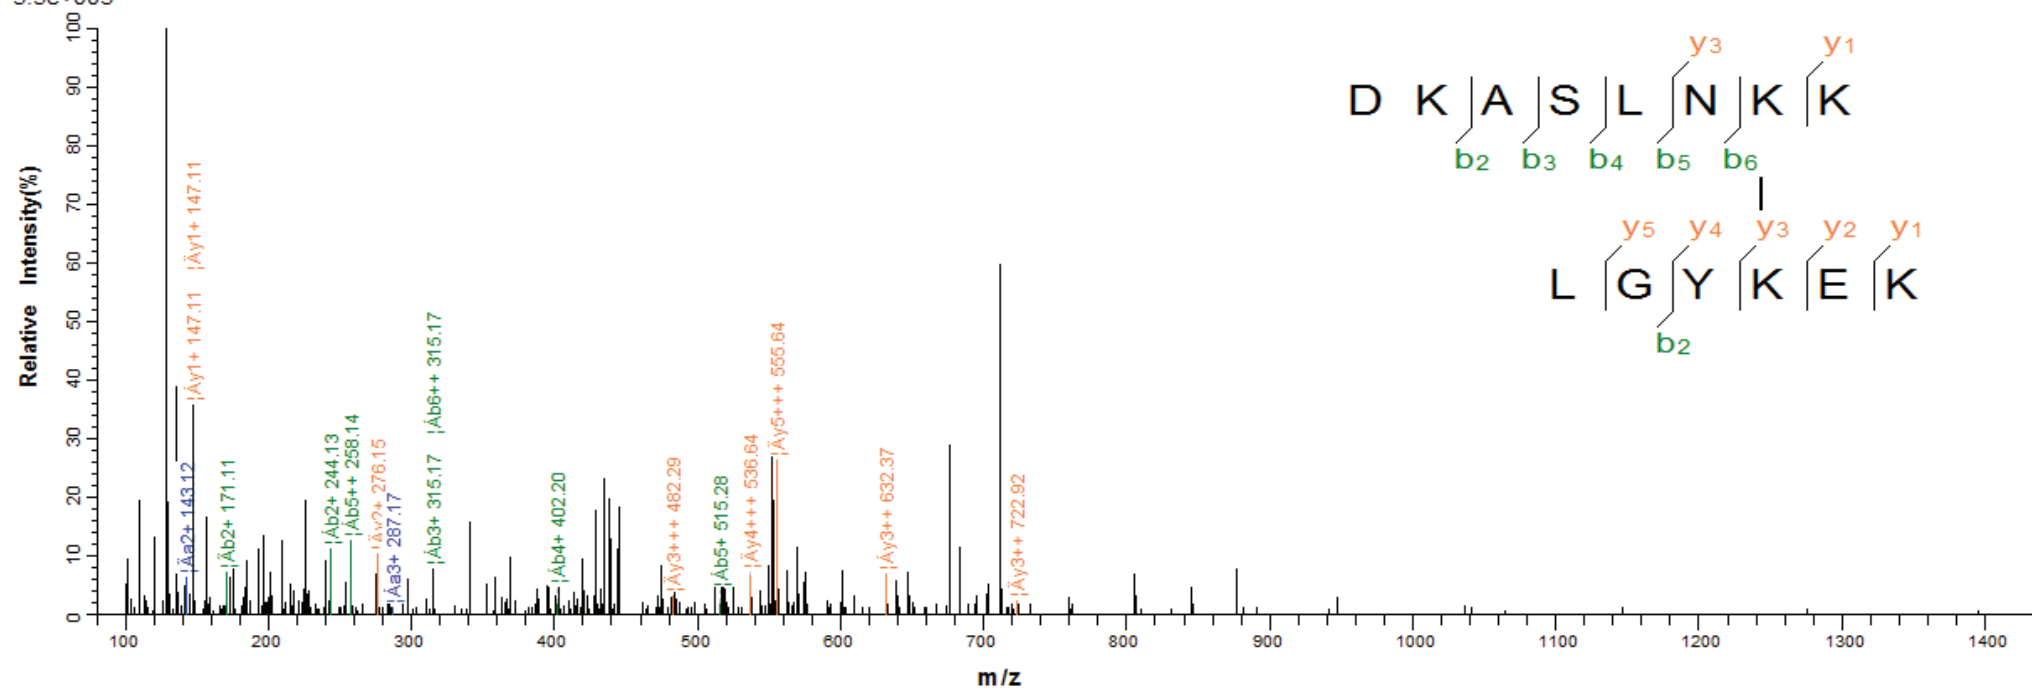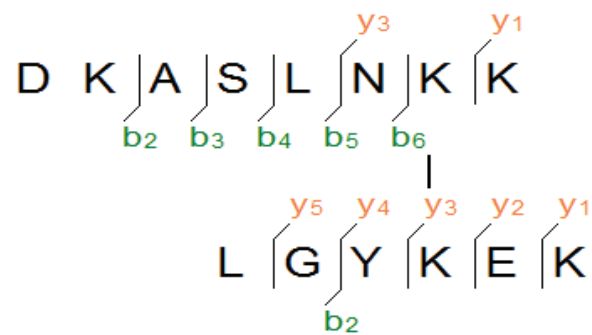

APC\_A9\_140131205754.005202.005202.5.dta Seq: GKIYFAQNNFNK-KFSLTR

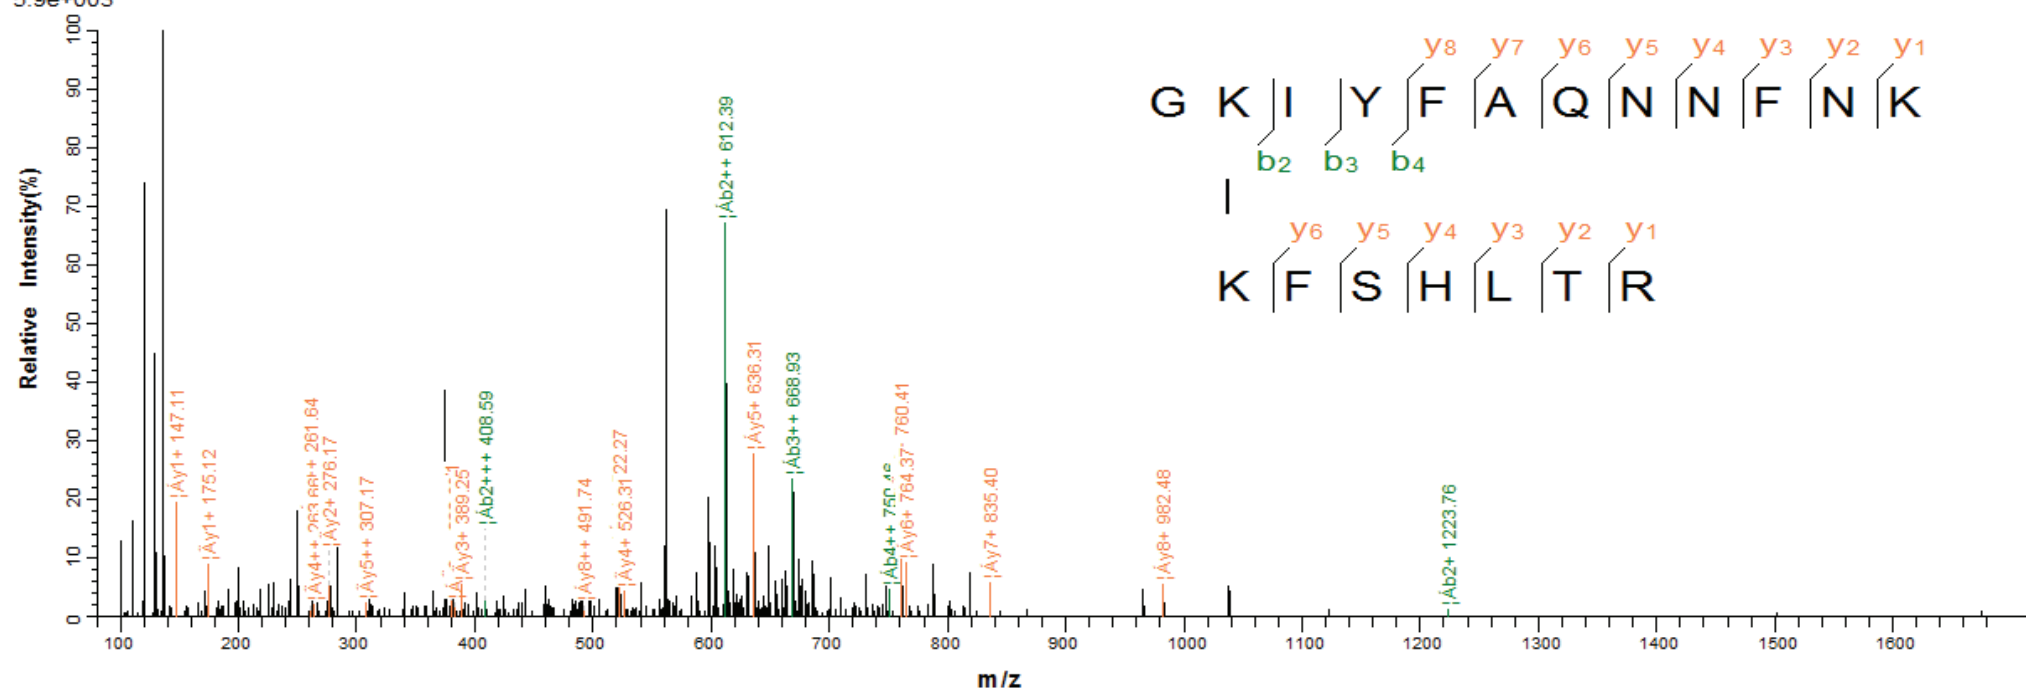

APC\_A9\_140131205754.003199.003199.5.dta Seq: KNEFVKAK-KFSHLTR

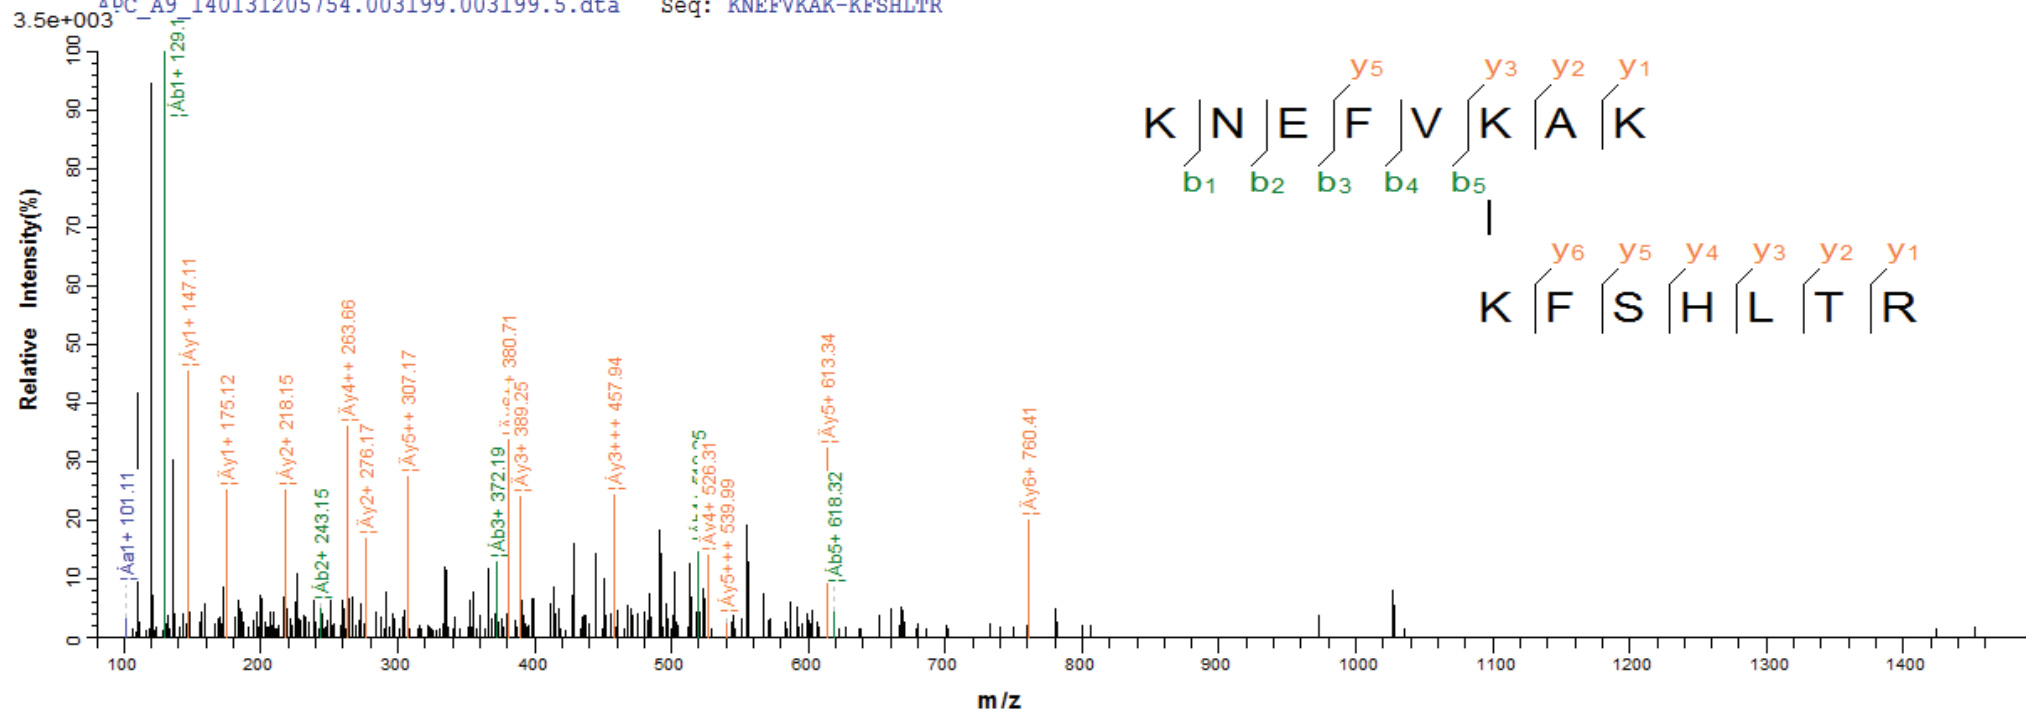

APC\_A9\_140131205754.005129.005129.4.dta Seq: DKASLNK-FFKLK

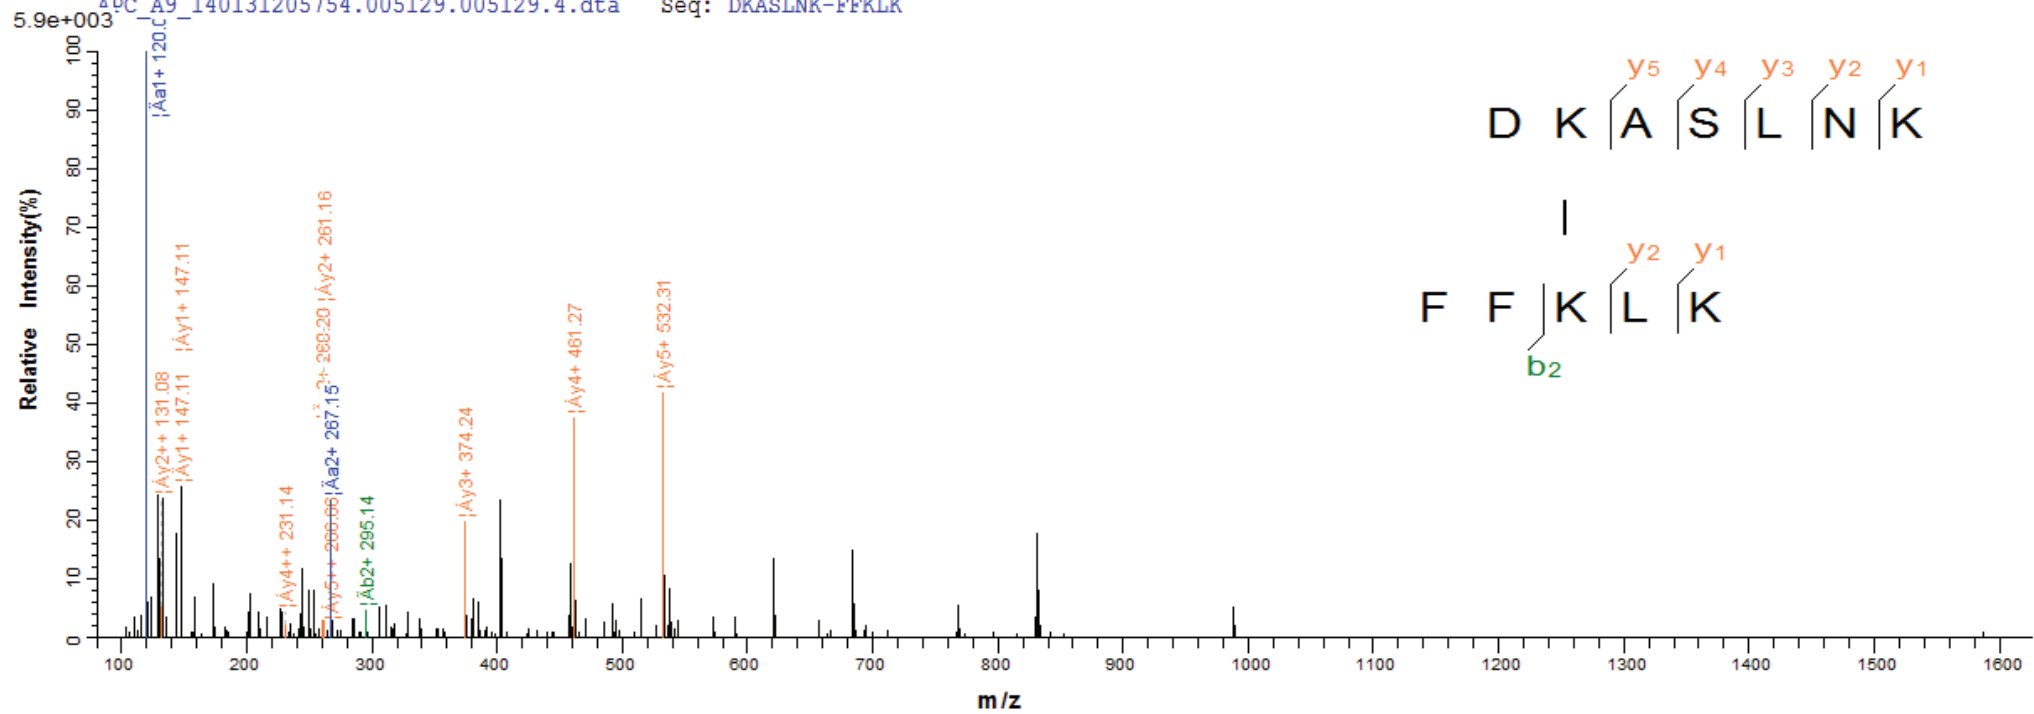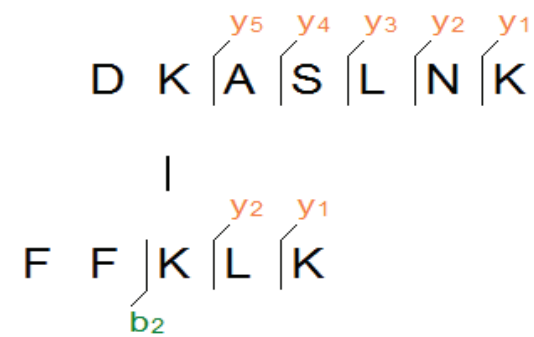

APC\_A9\_140131205754.005298.005298.4.dta Seq: DYKLADNVDVVR-NKQGVPK

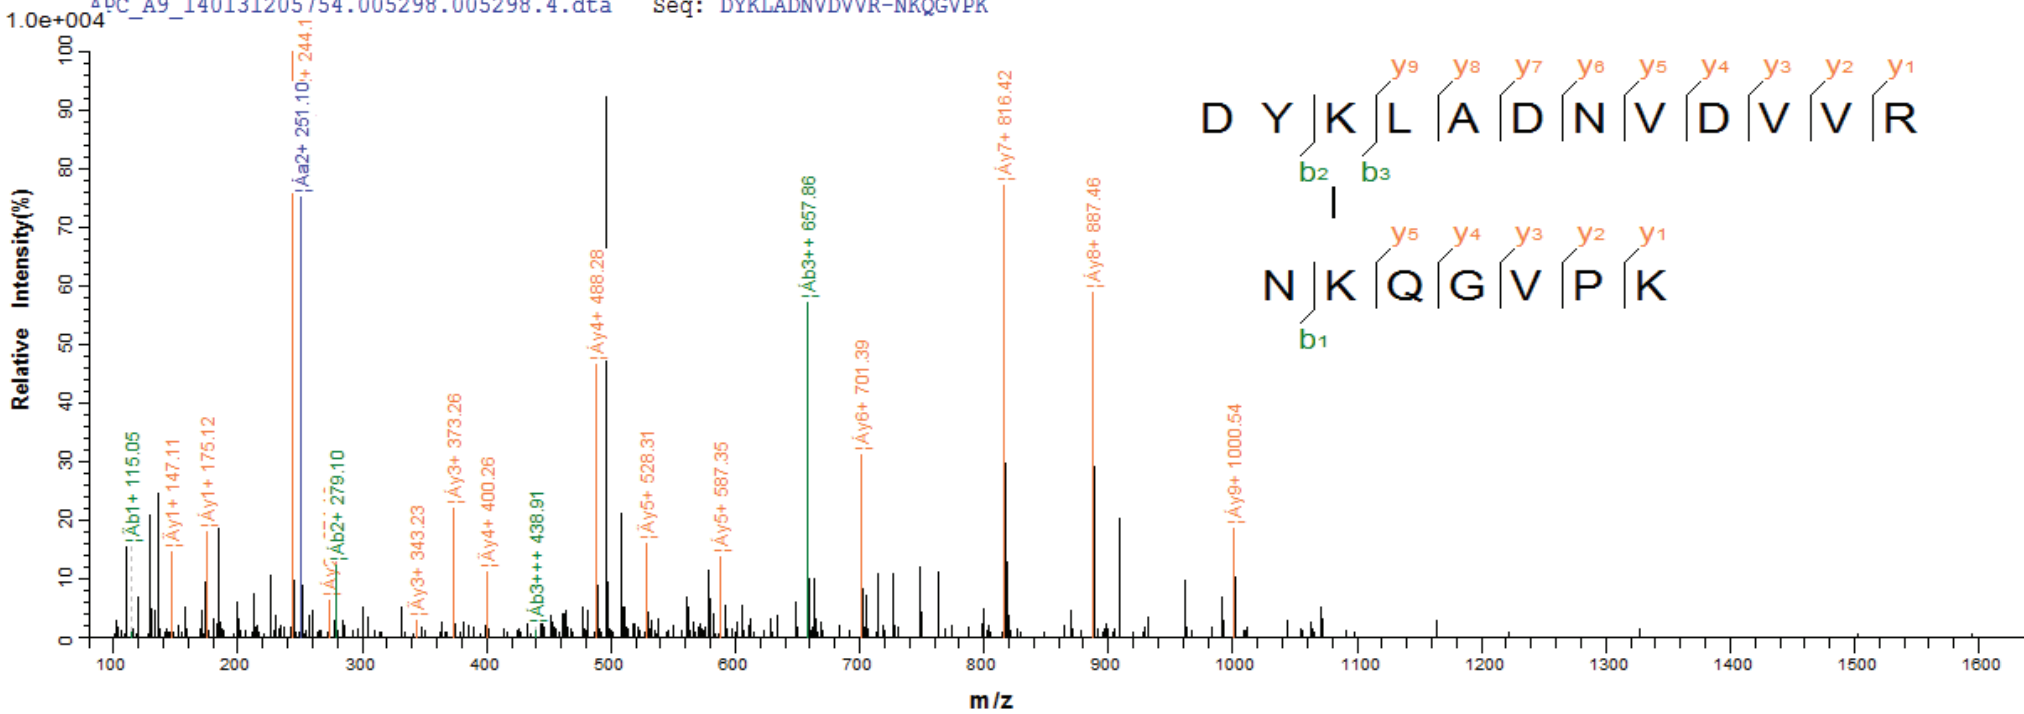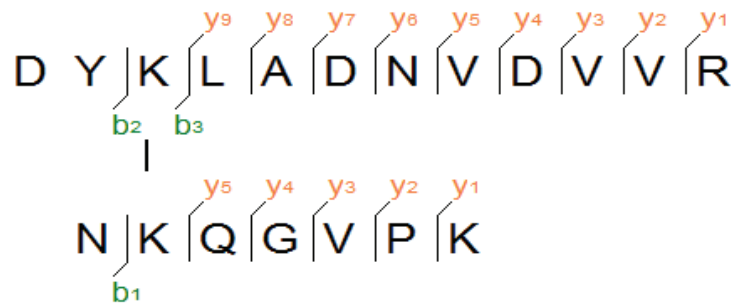



APC\_A9\_140131205754.002417.002417.4.dta Seq: KNEFVK-KKDAIK

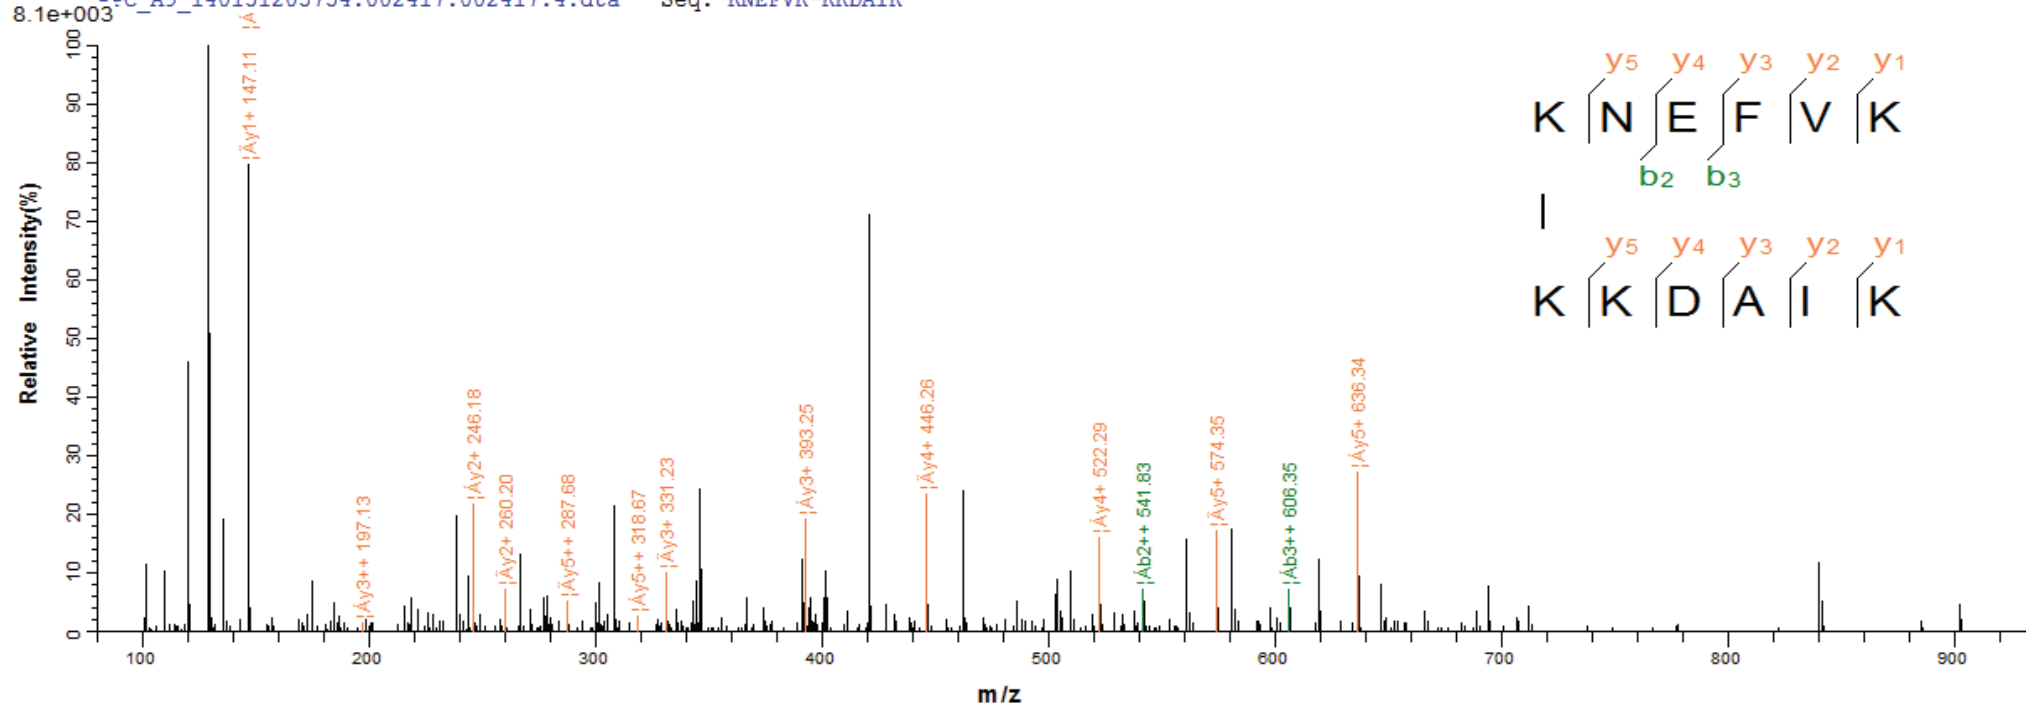

APC\_A9\_140131205754.002723.002723.5.dta Seq: SDSKEVLKR-CYKR Mod: 13,C\_57

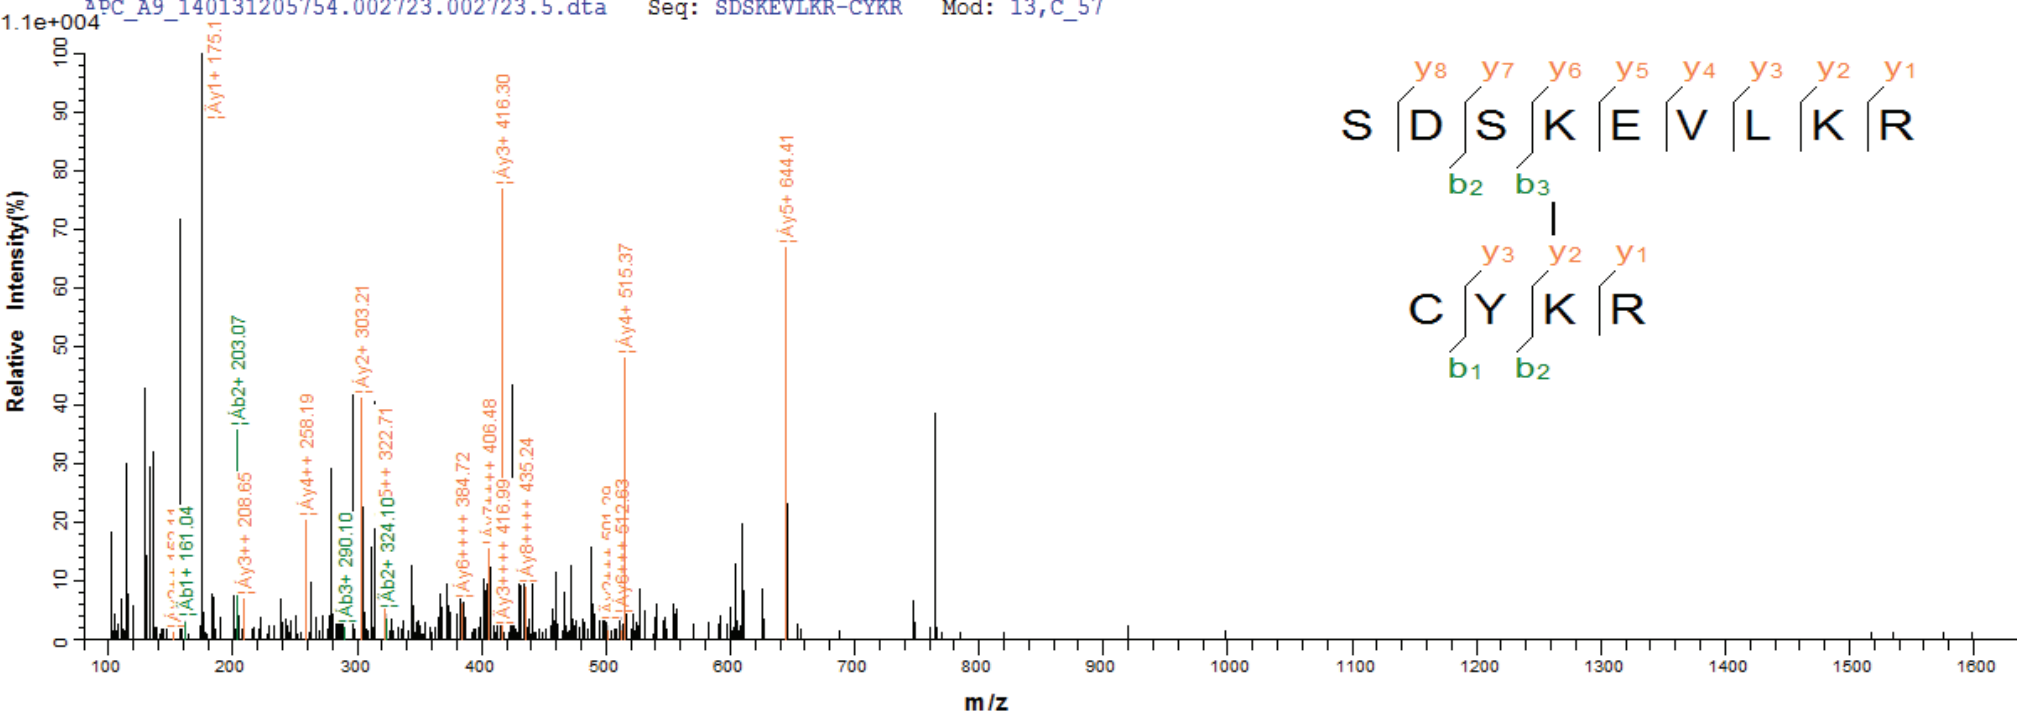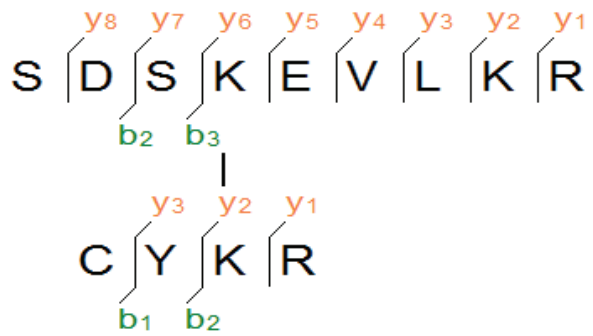

Seq: FSVS GEGEGDATY GKLT LK-NKLLTPPSK

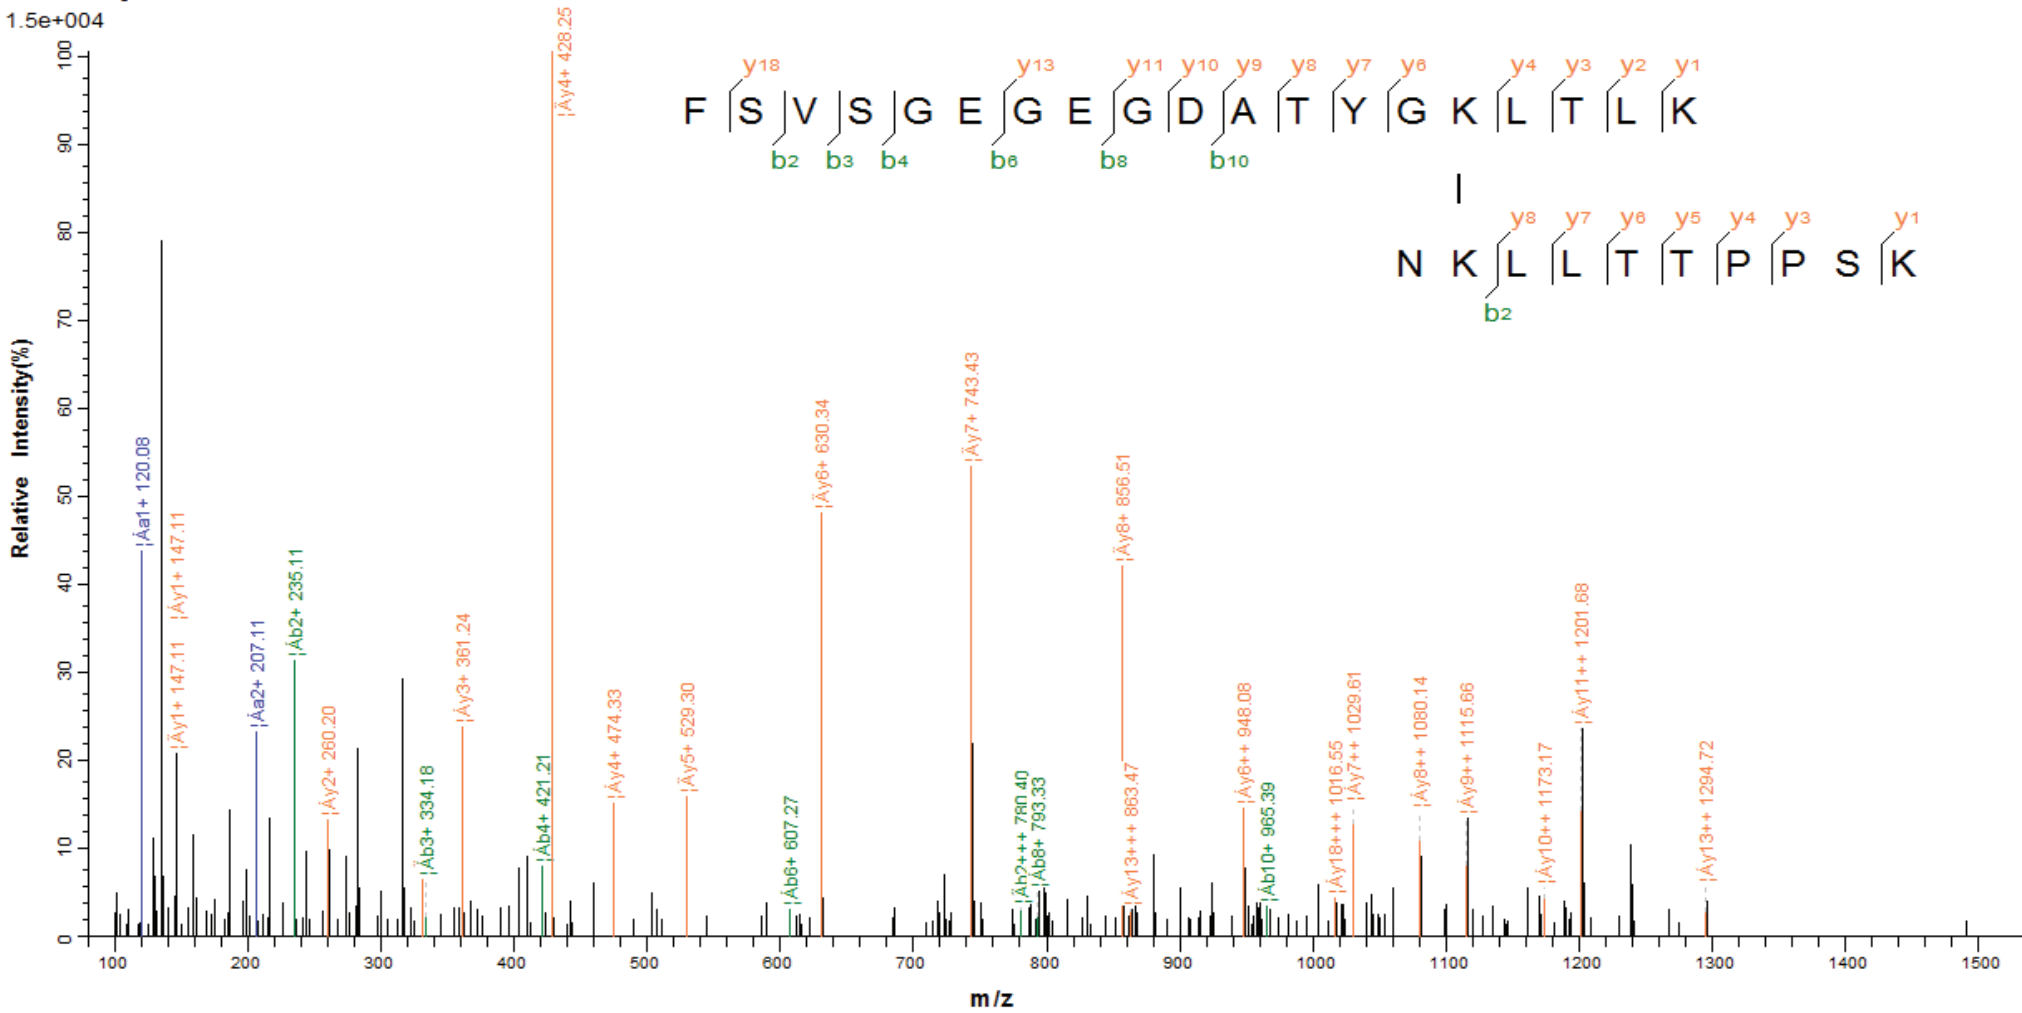

Seq: ANLKMVSNEHESQSNISLKLK-SLYLKPNNSSATALLK

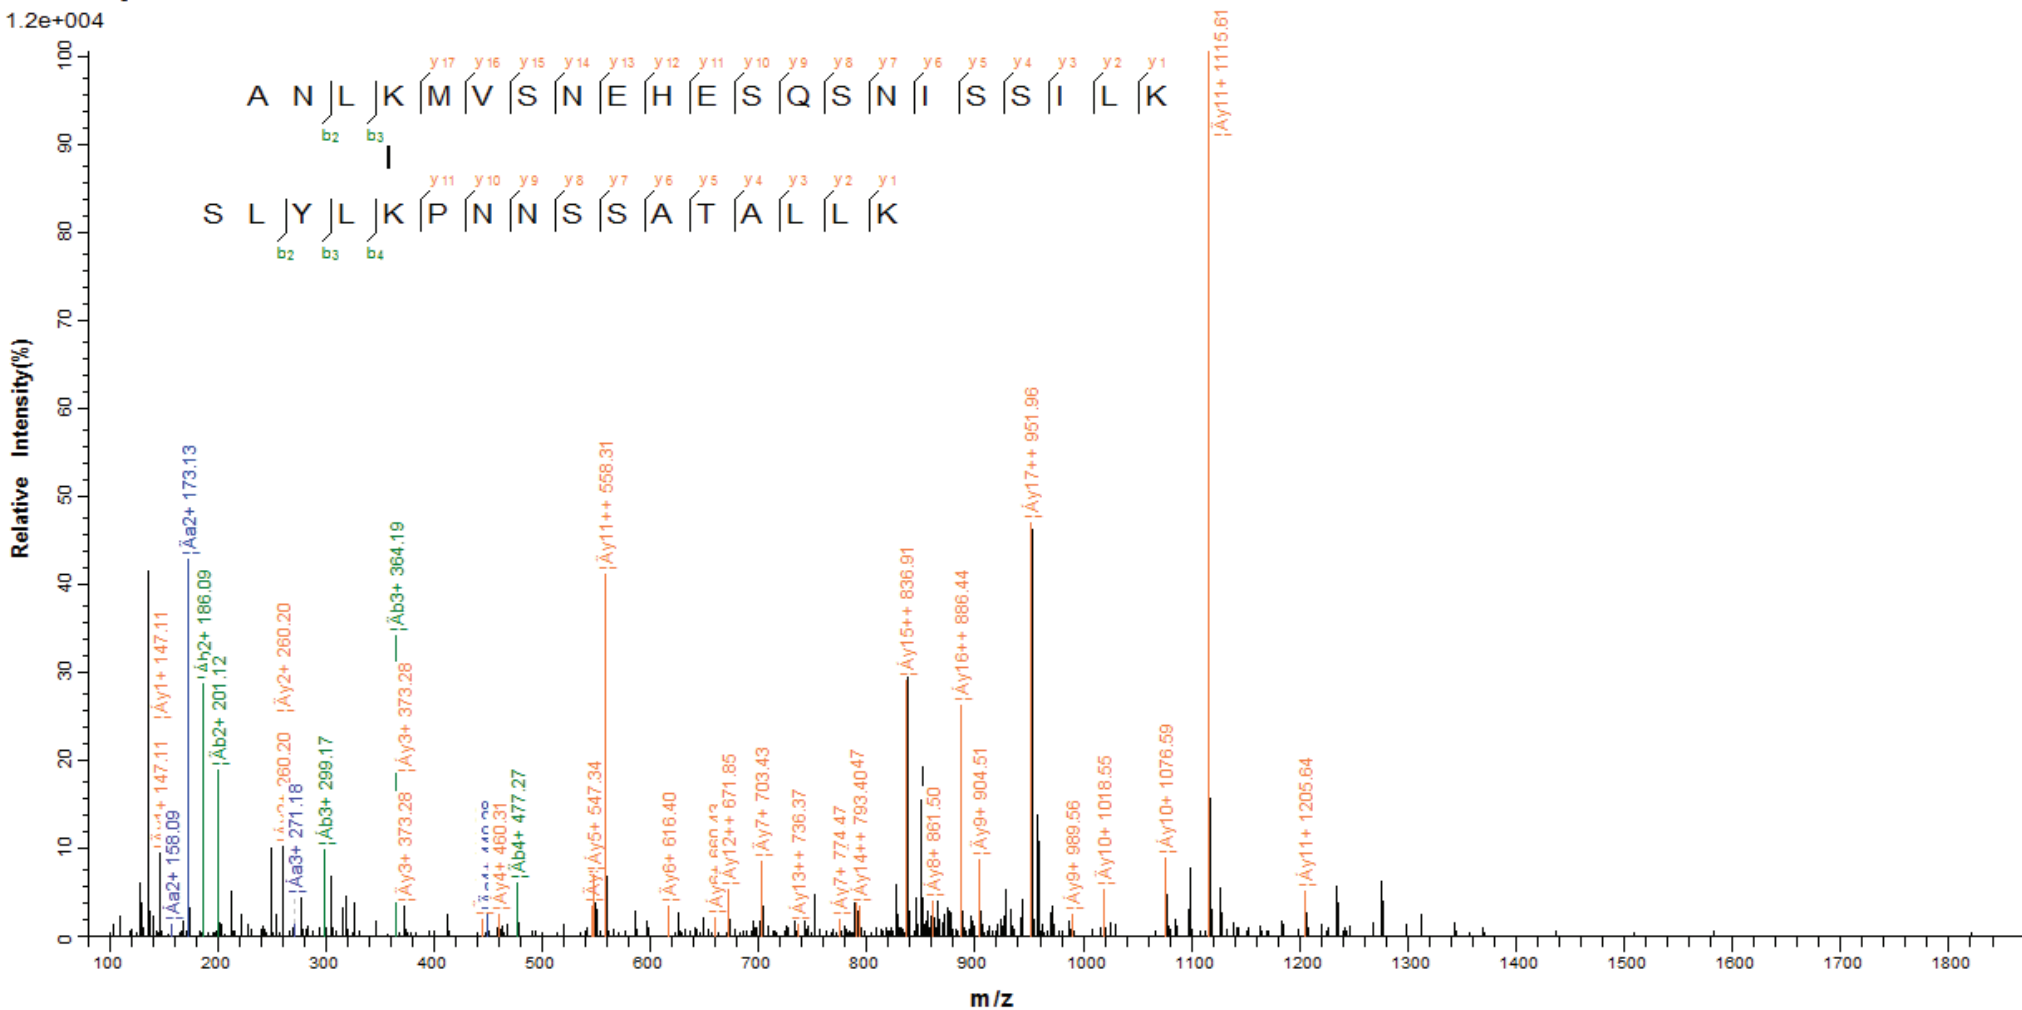

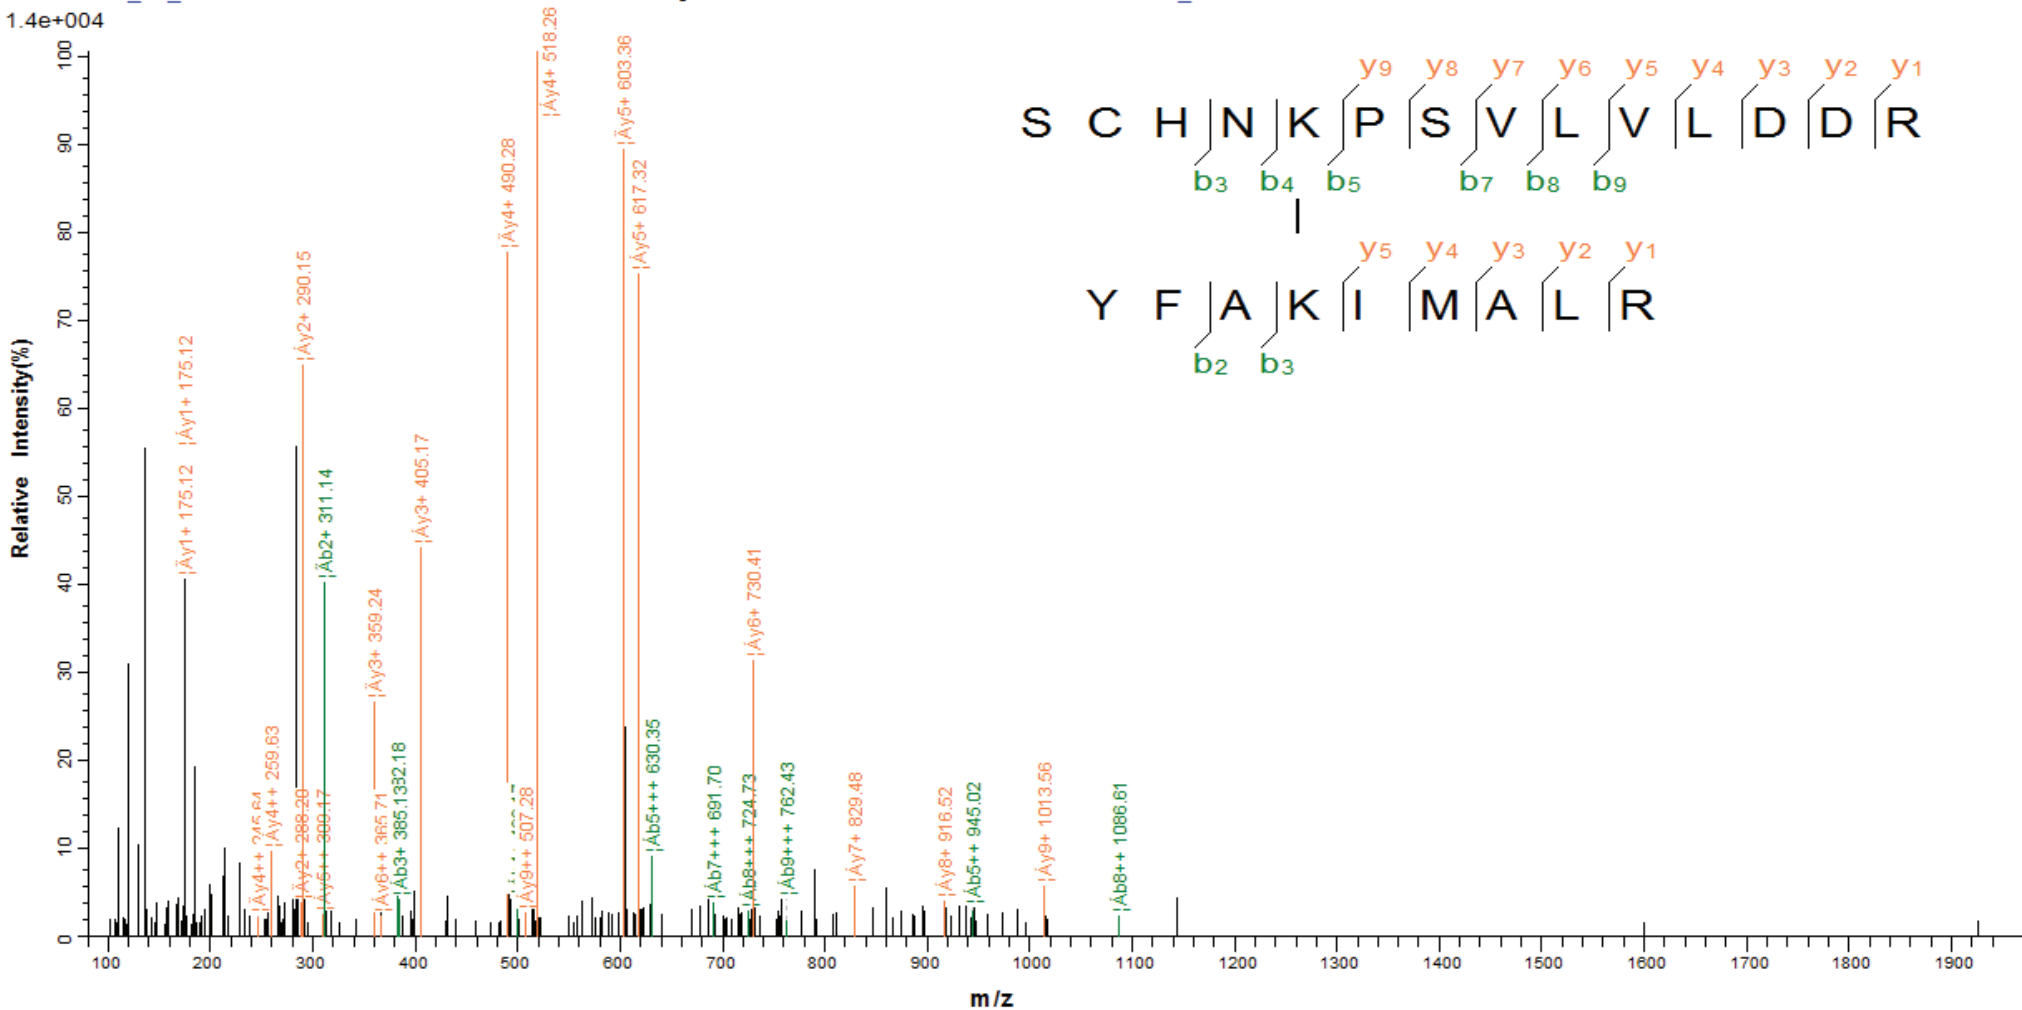

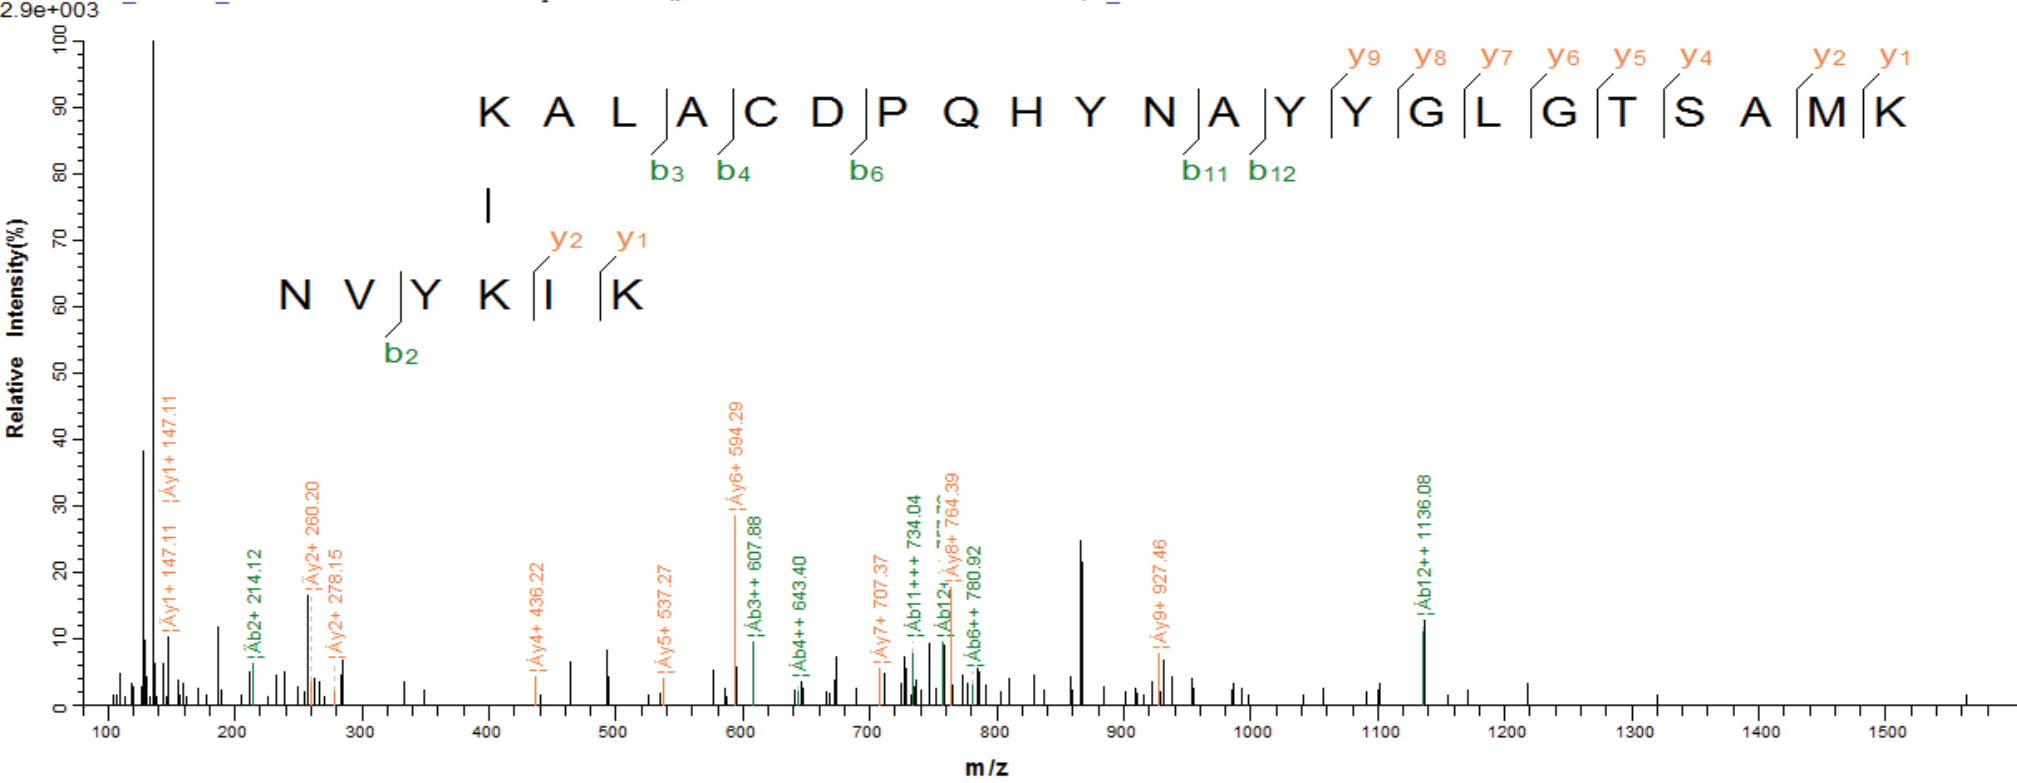

1.6e+004 PC\_A8\_140201121226.004228.004228.4.dta Seq: IIKLIDEYK-VPLAKNR Charge: 4

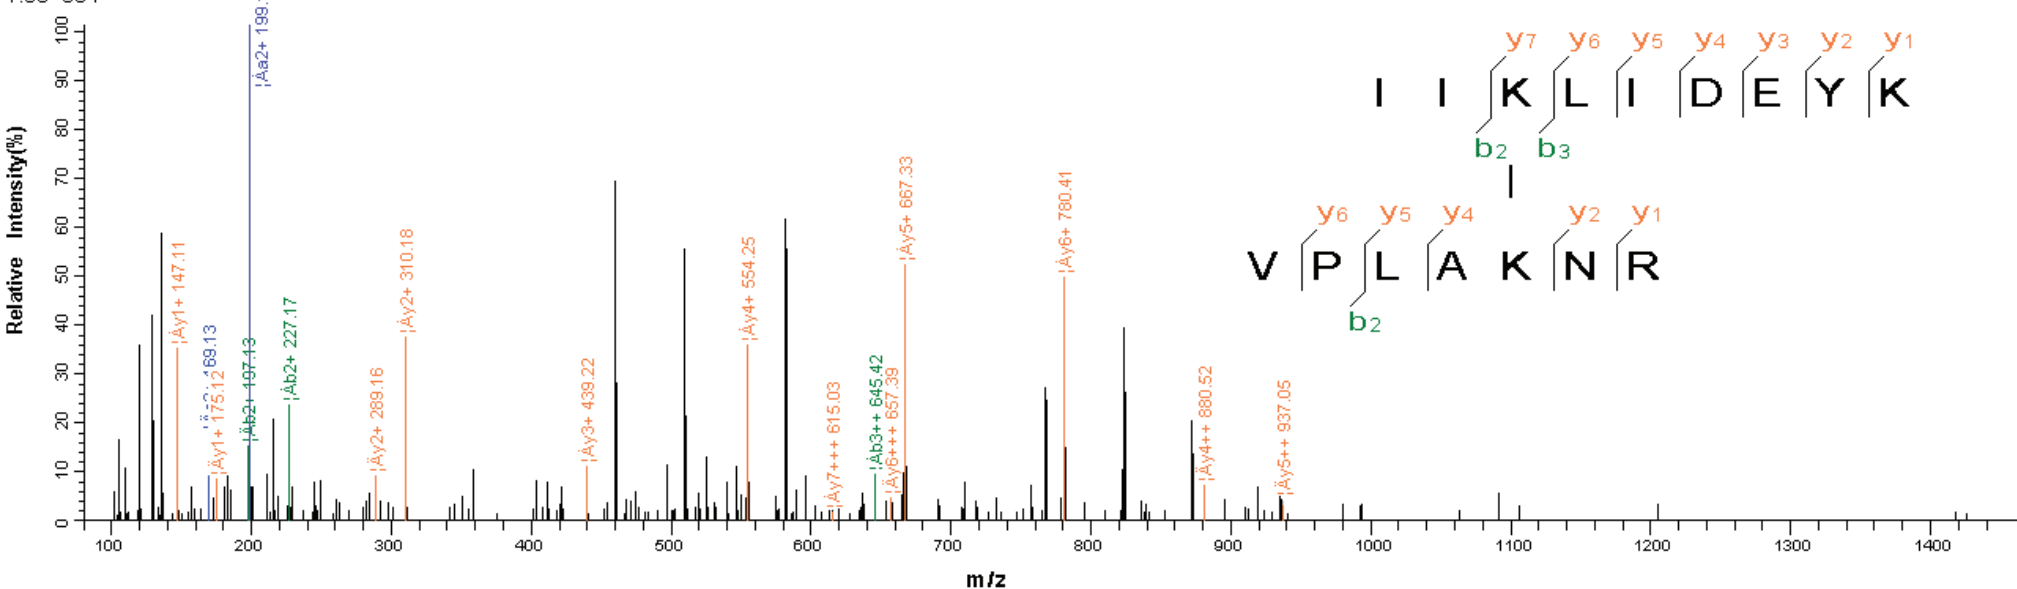

6.6e+003 PC\_A8\_140201121226.006843.006843.4.dta Seq: TEYAQLAQKK-SPFLWNLKVK Charge: 4

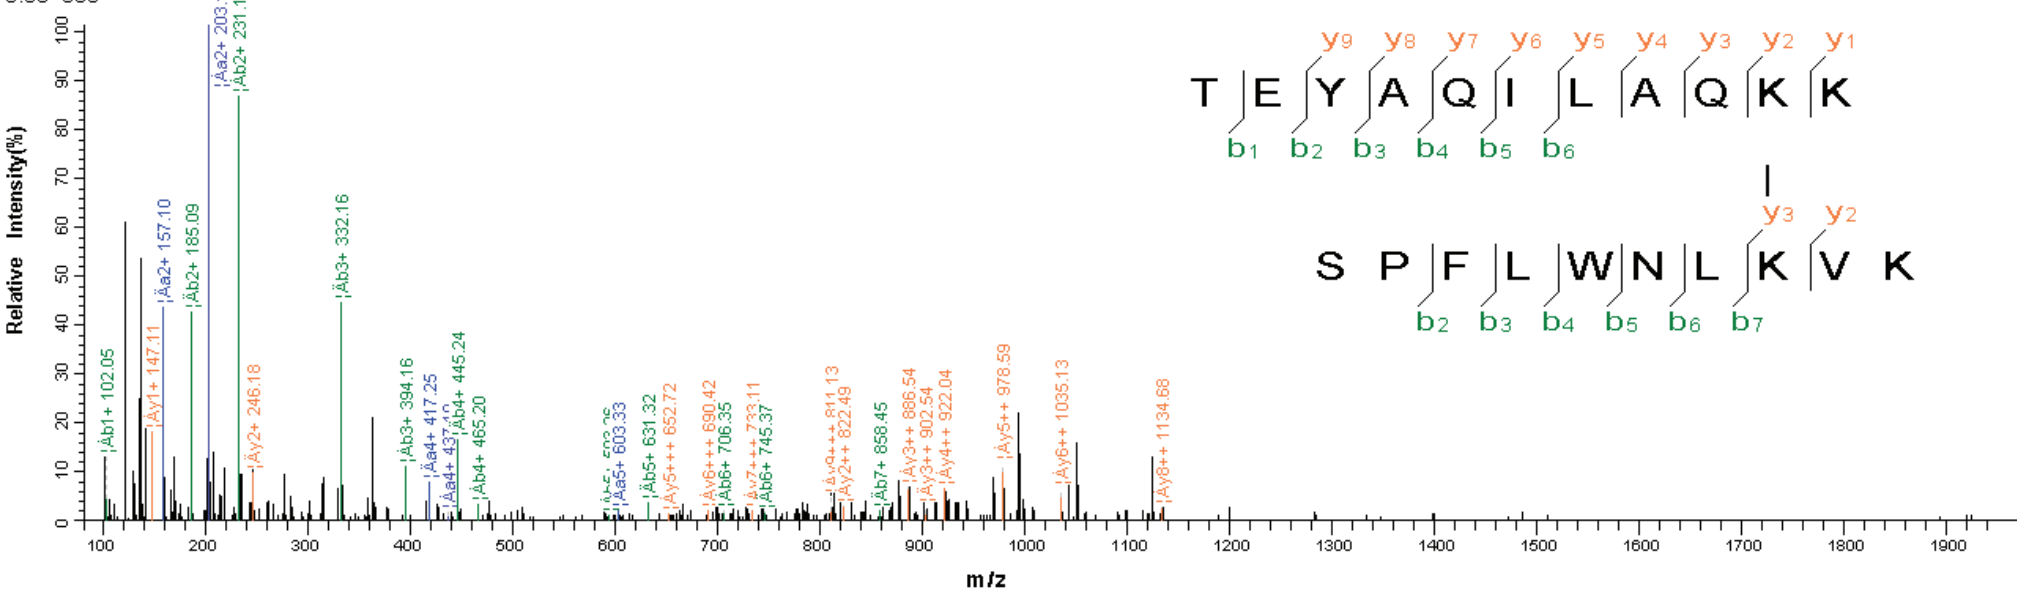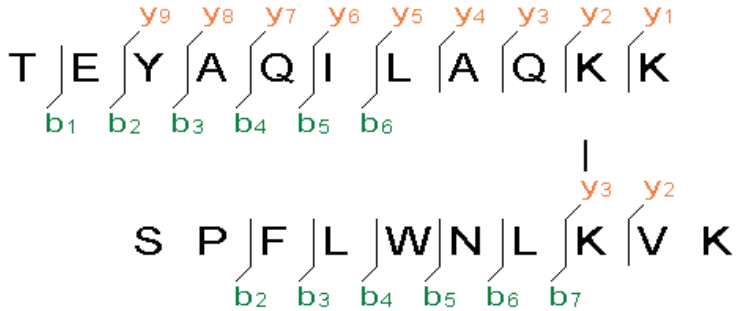



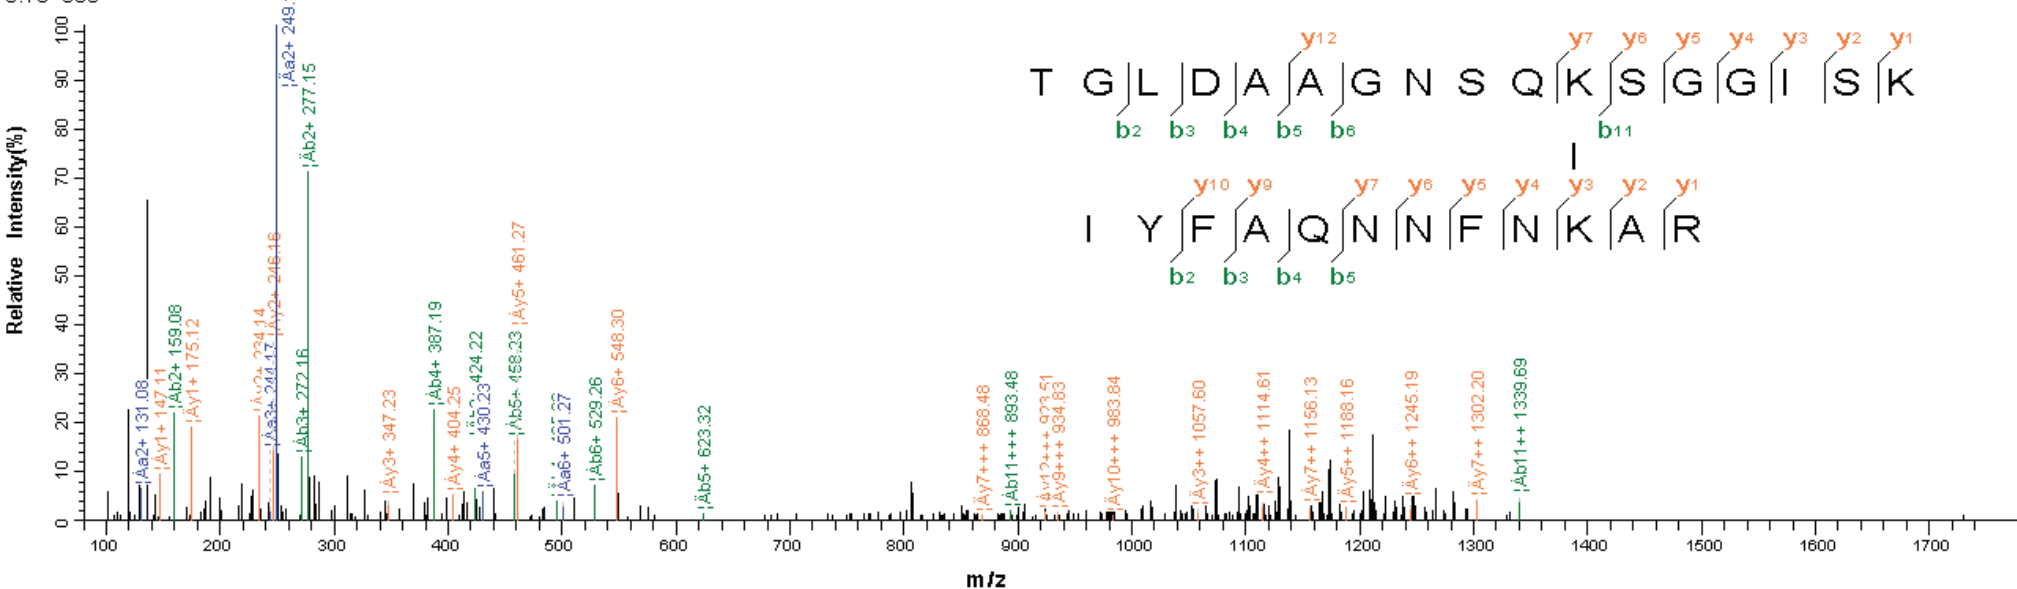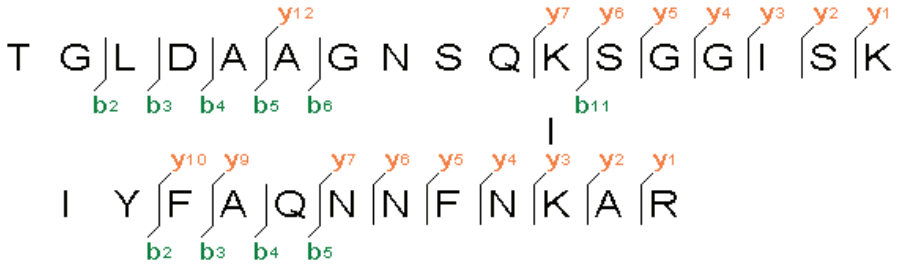

3.8e+003 PC\_A8\_140201121226.003490.003490.5.dta Seq: IYFAQNMFNFKAR-KPSHLTR Charge: 5

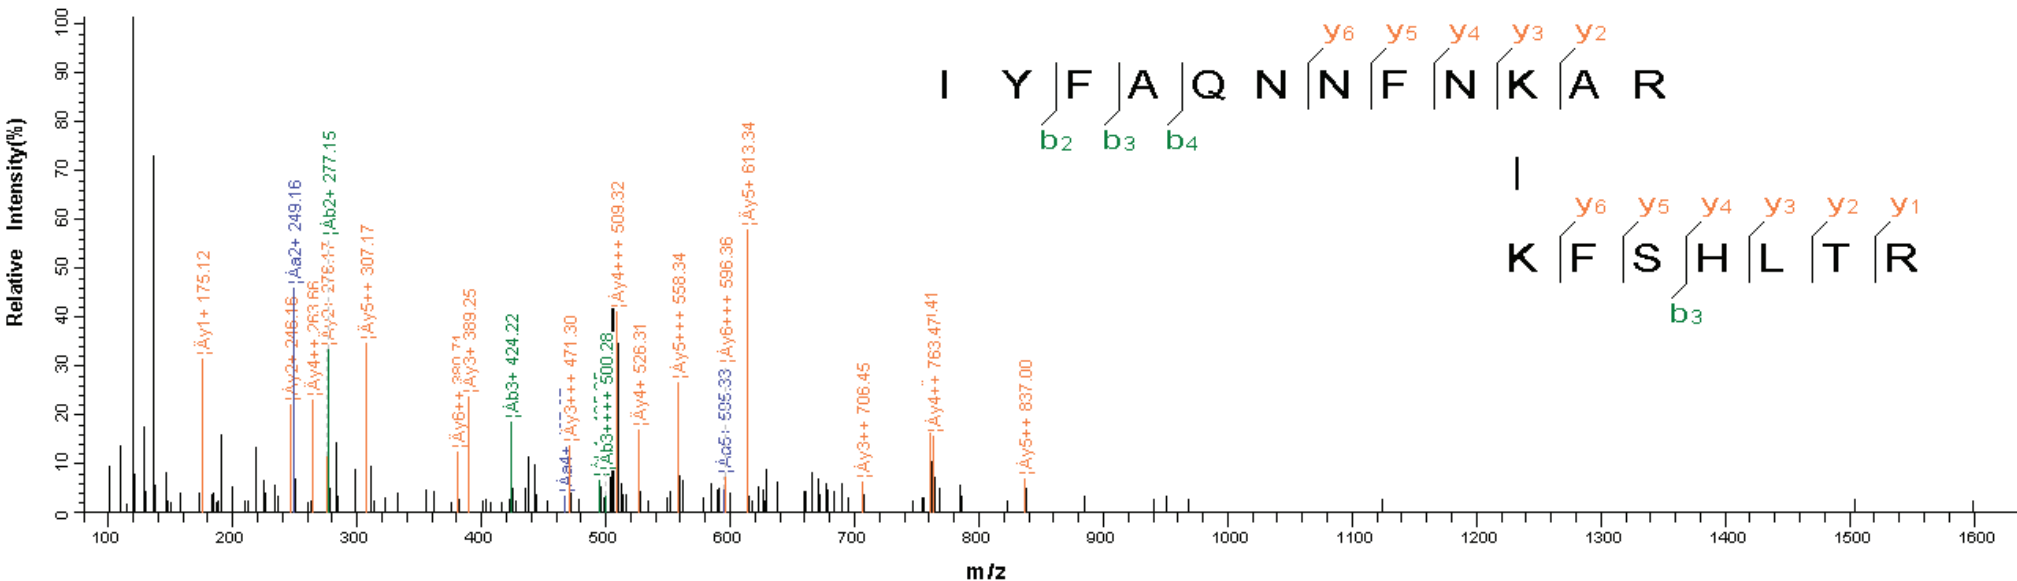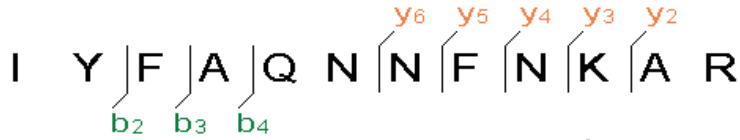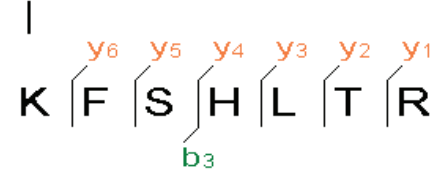

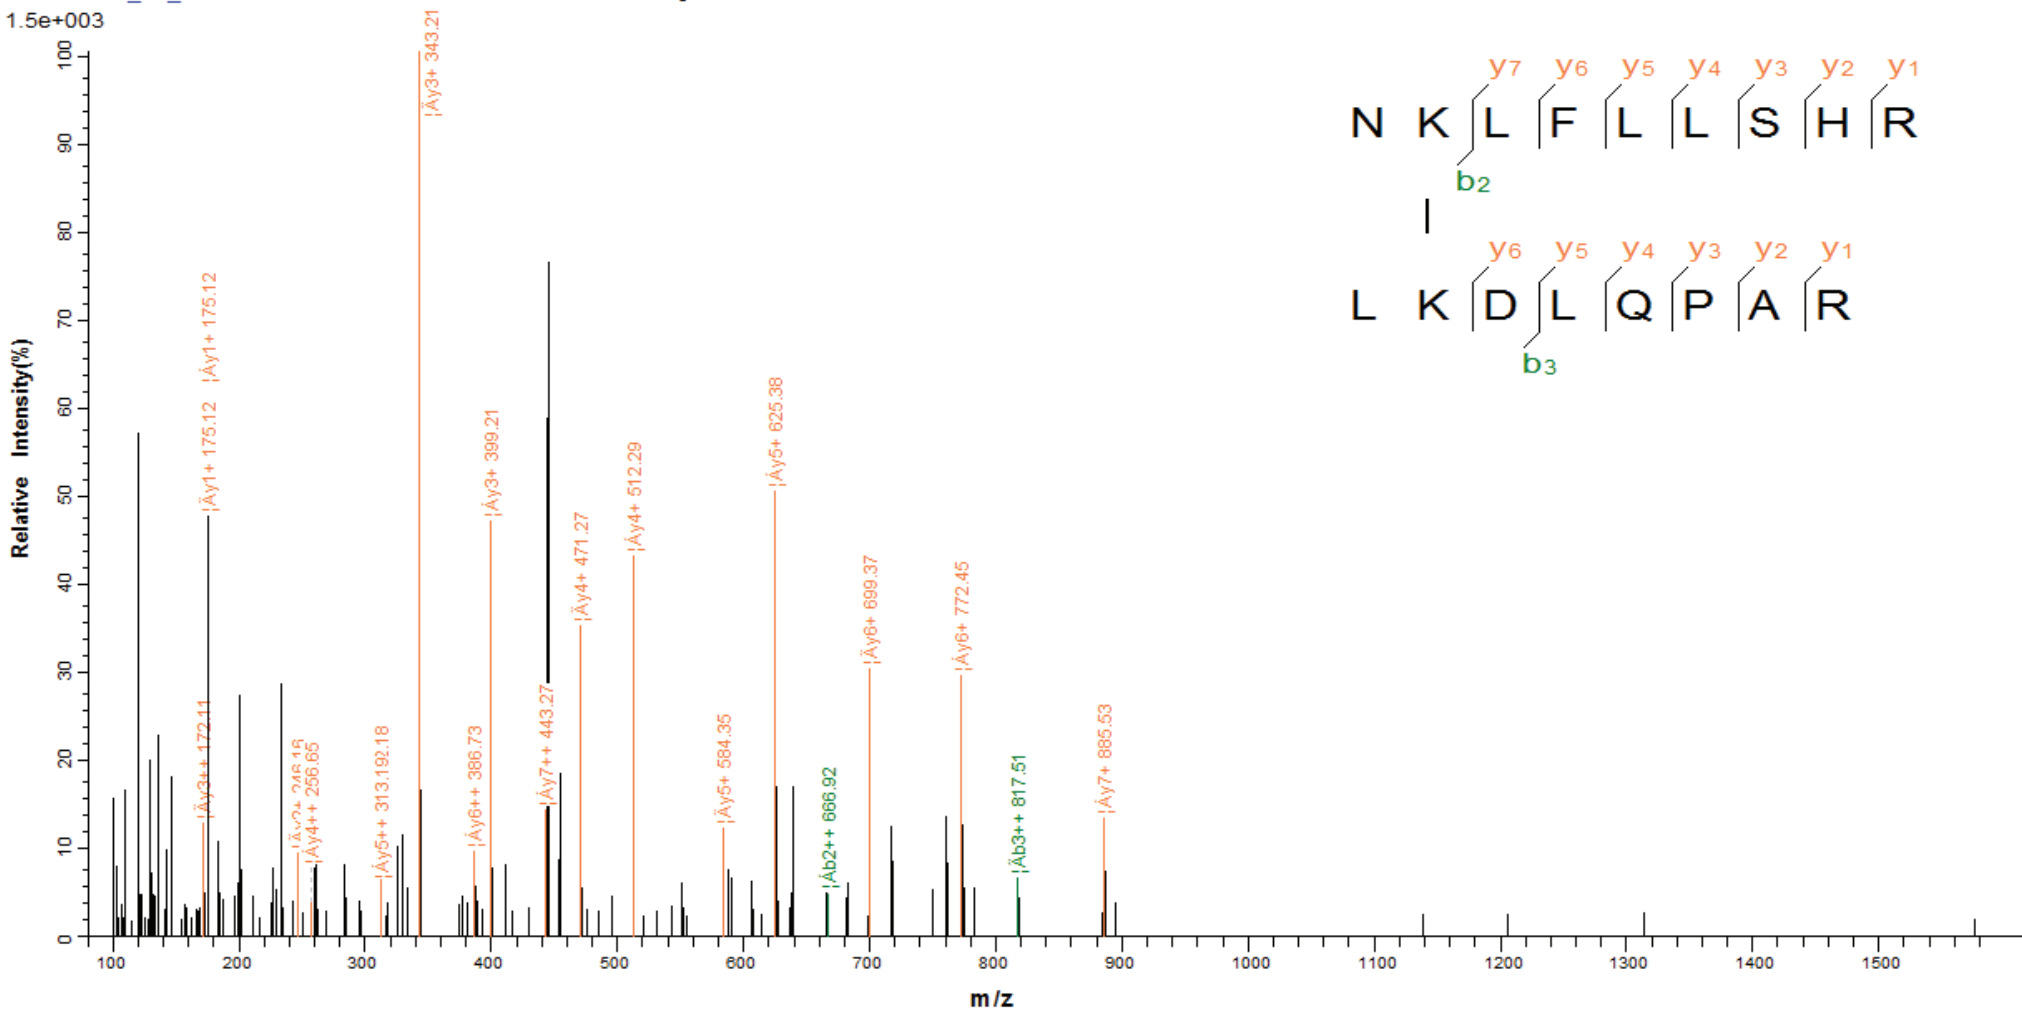

6.9e+003 PC\_A8\_140201121226.006331.006331.4.dta Seq: FETLLSMVKESK-VPLAKNR Charge: 4

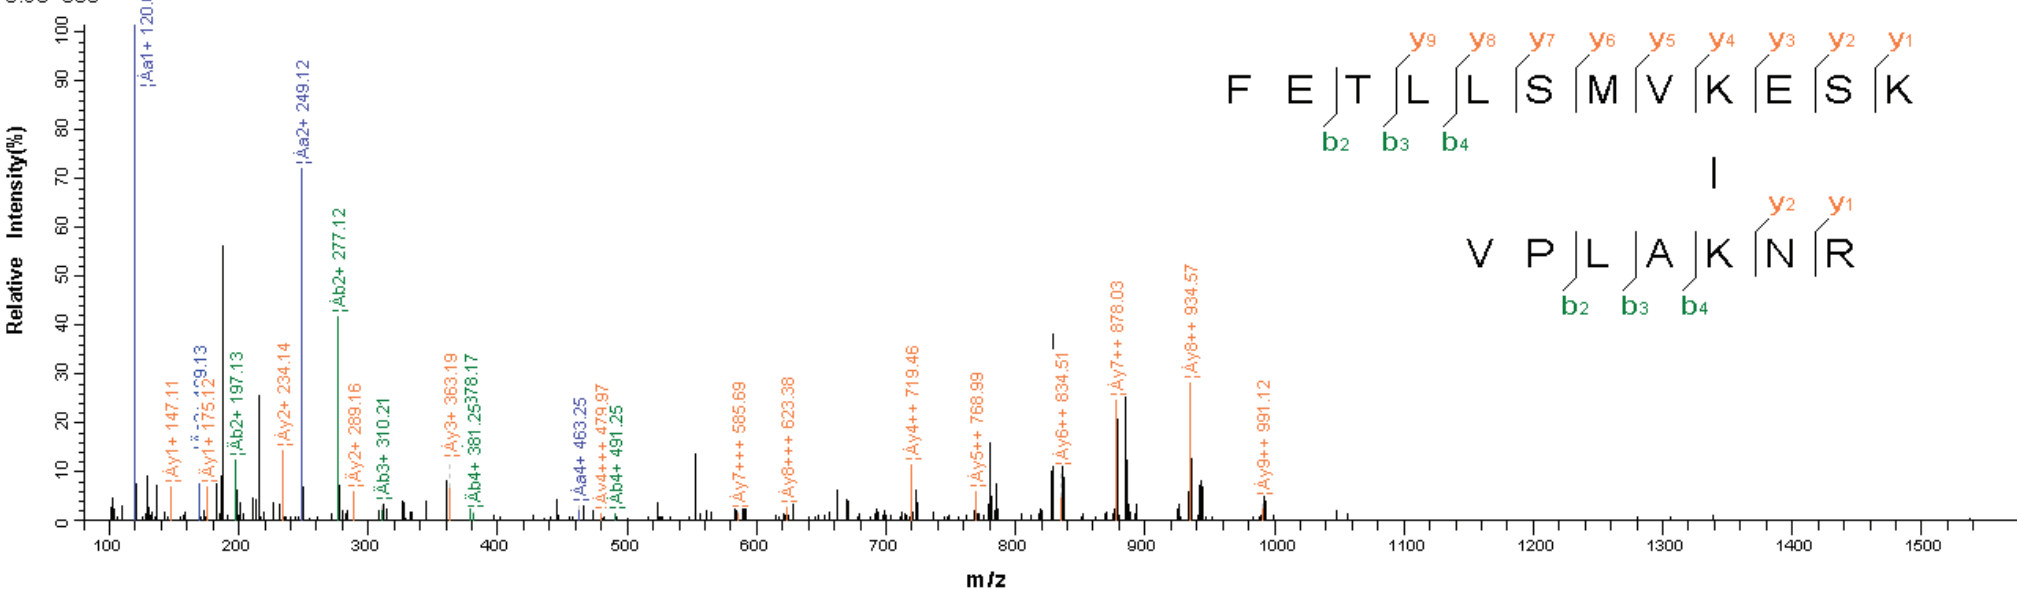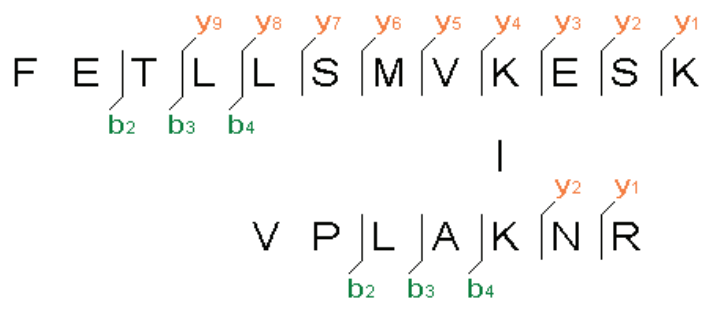

APC\_ingel\_06242014\_A8.4013.4013.4.dta

Seq: KYELTLQR-IAKGLAIYR

Score: 1.01e-009

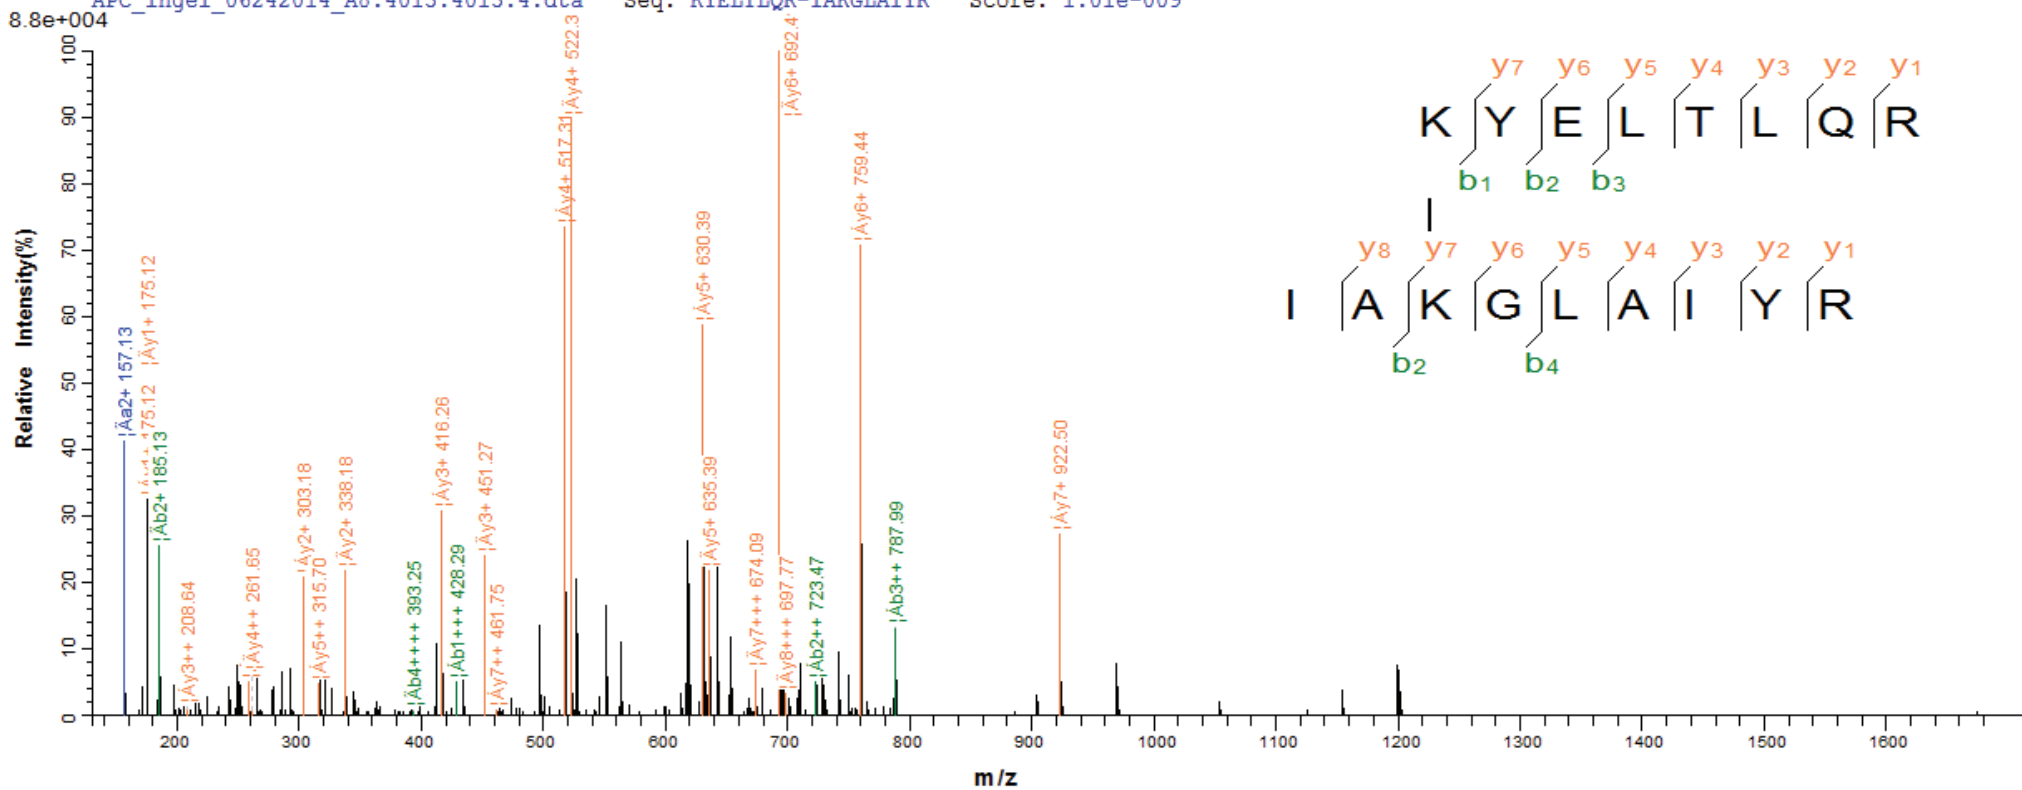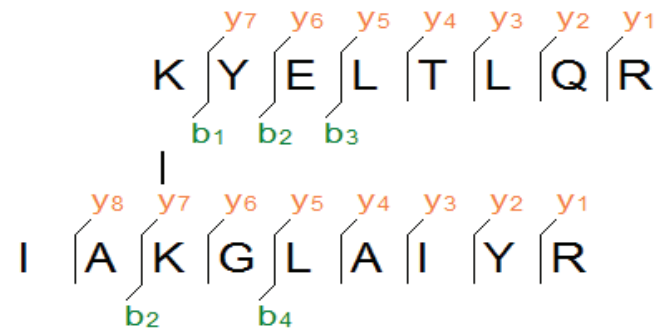

1.6e+003 PC\_A8\_140201121226.008860.008860.5.dta Seq: DFKDYTNIVTTFLLSDFKK-AAESKNYSR Charge: 5

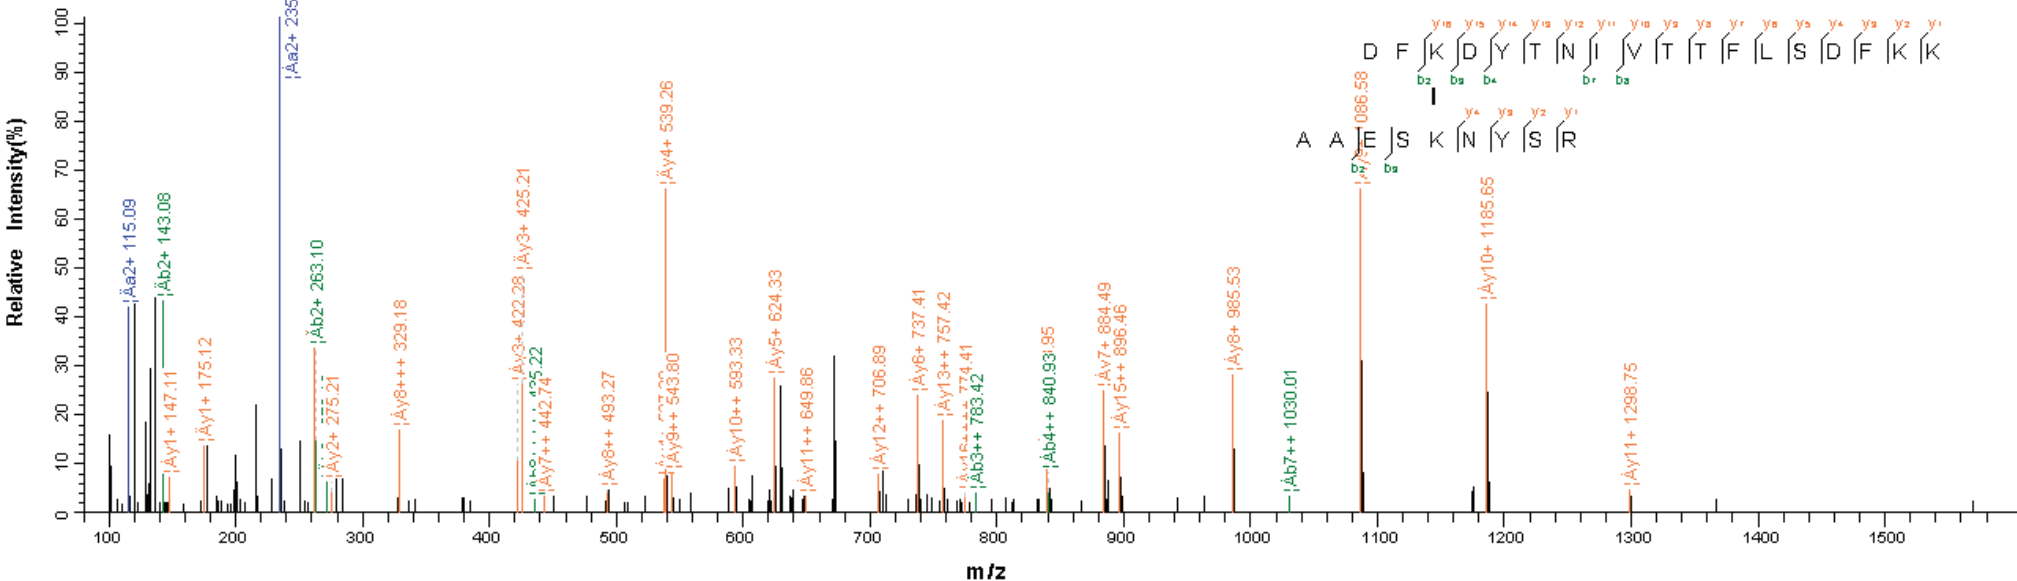

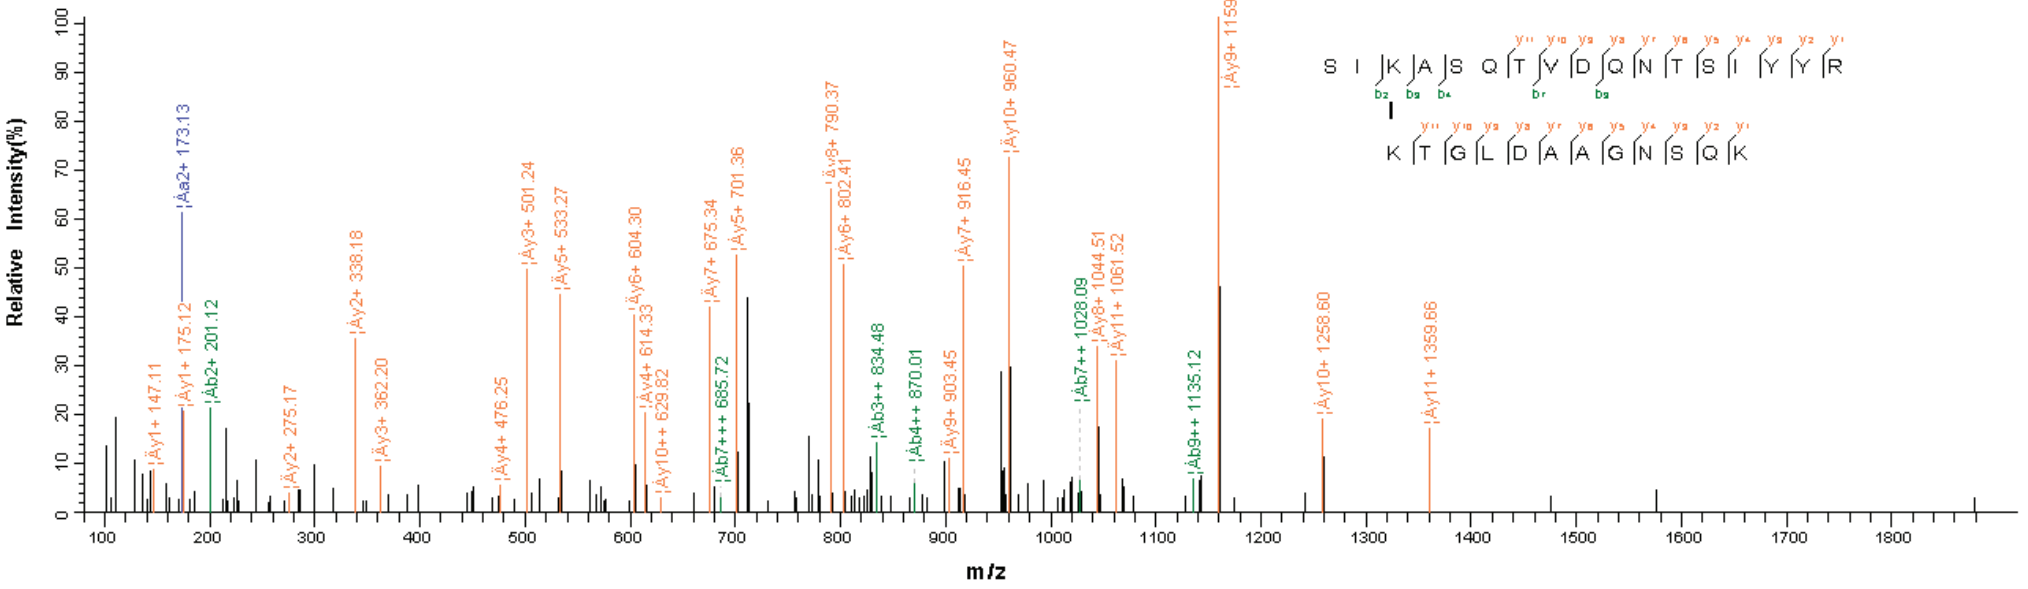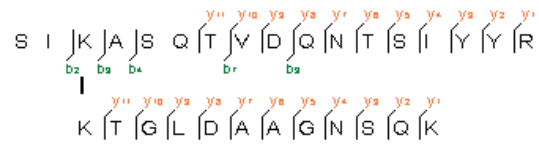

PC\_A8\_1402011226.006508.006508.4.dta Seq: TEYAQILAQKK-KSPFLWNLK Charge: 4

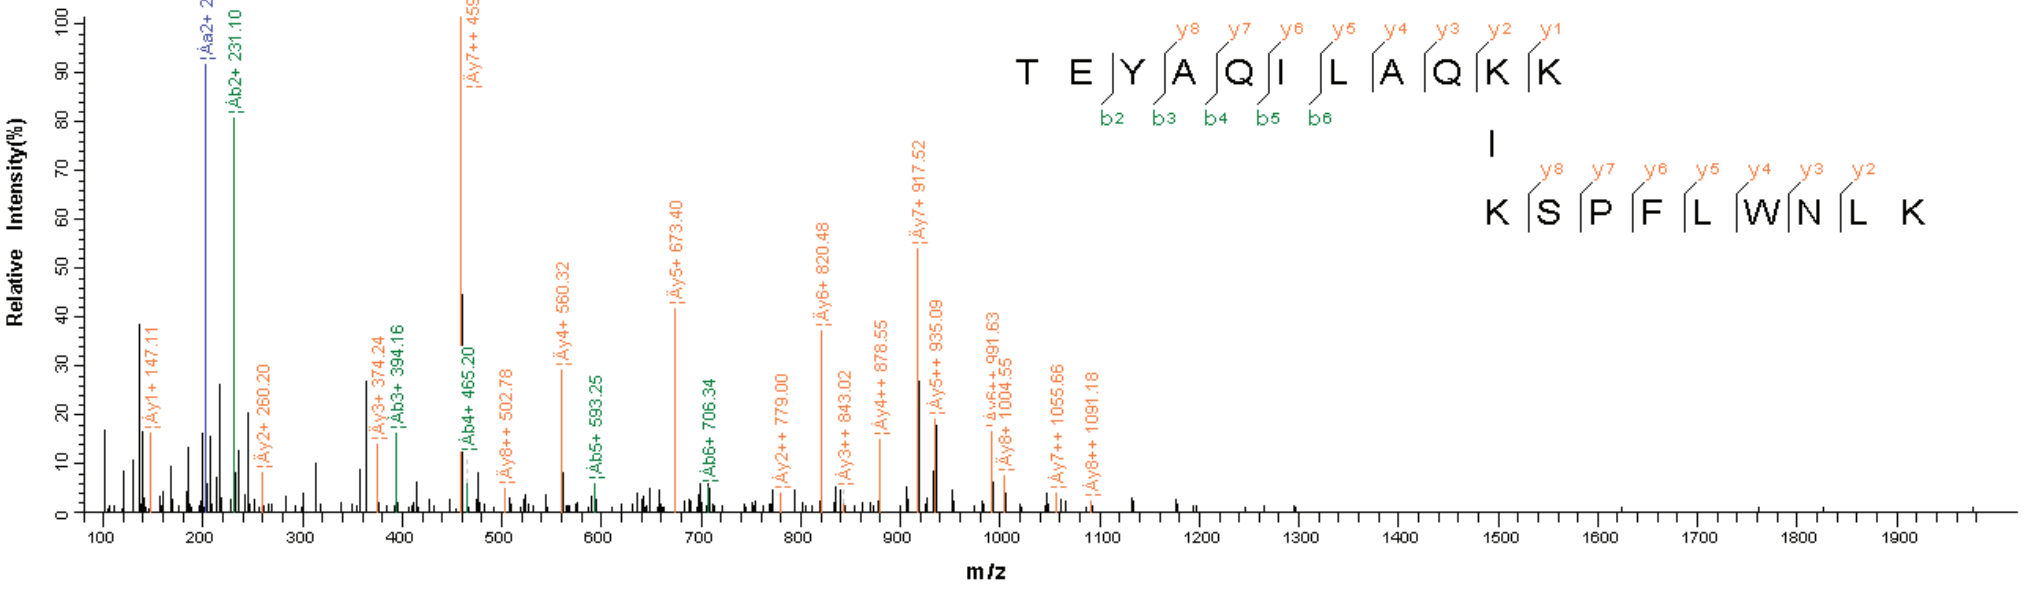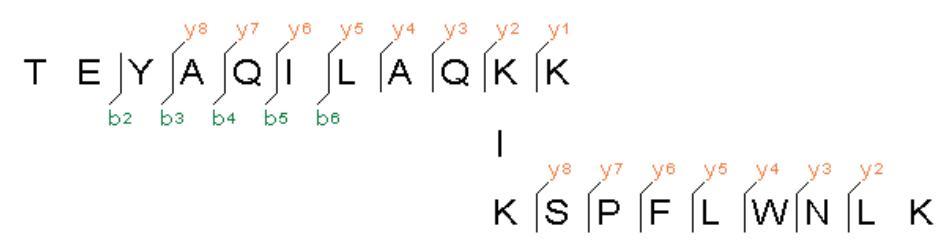



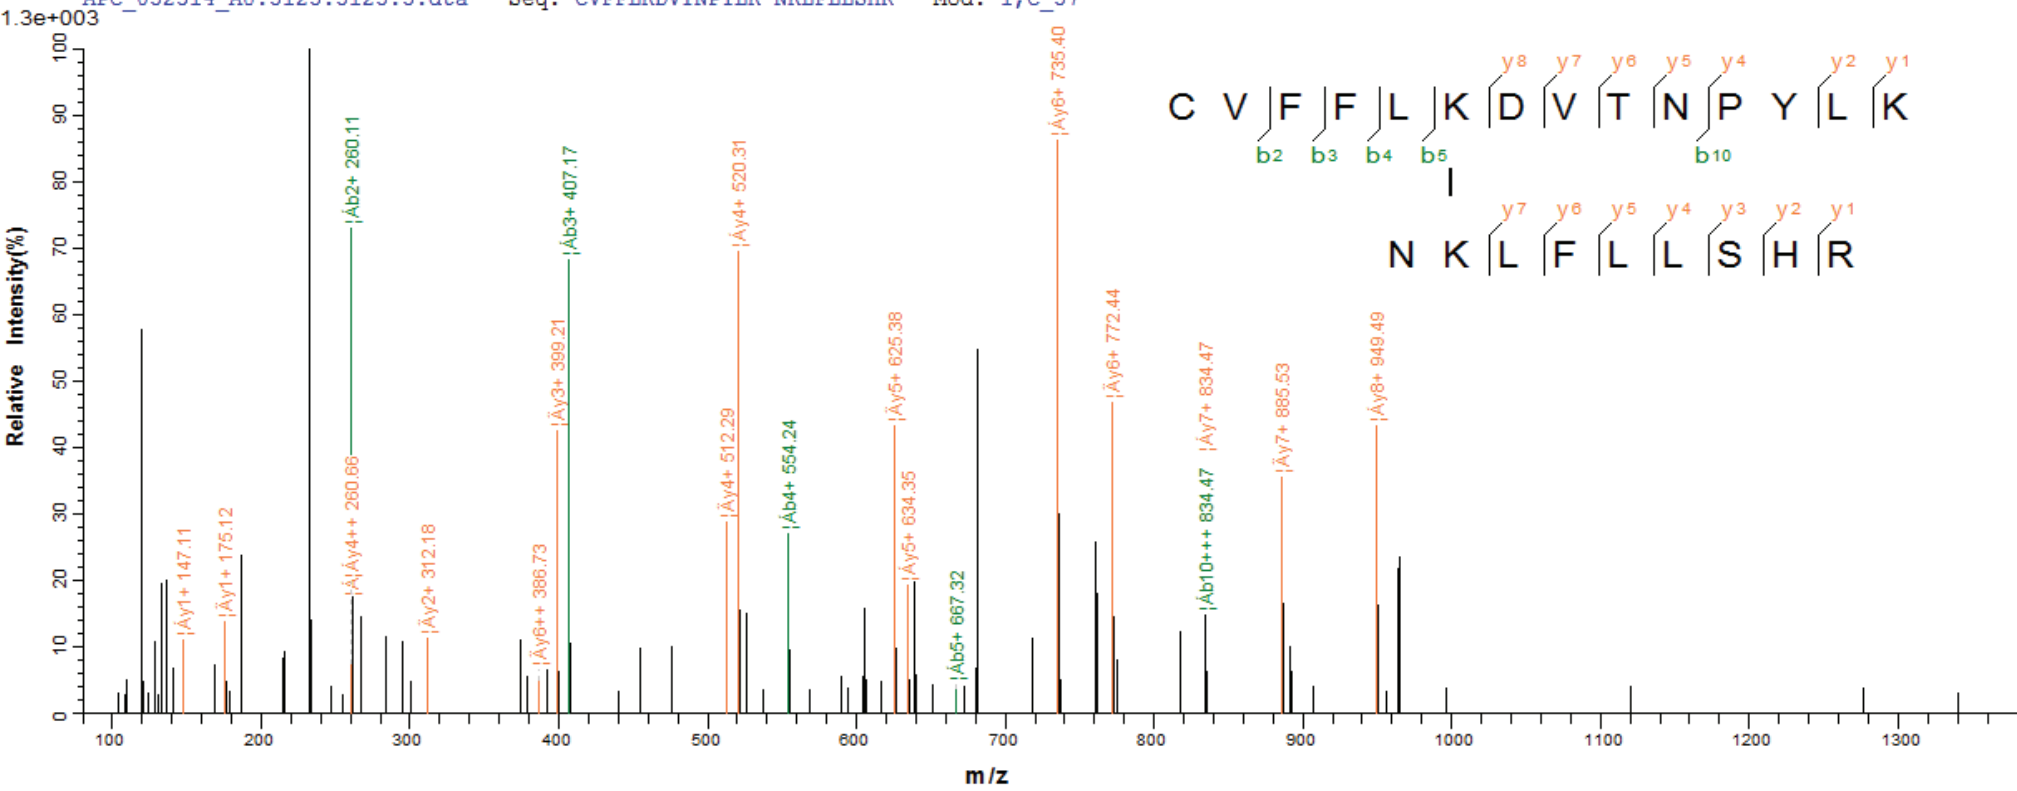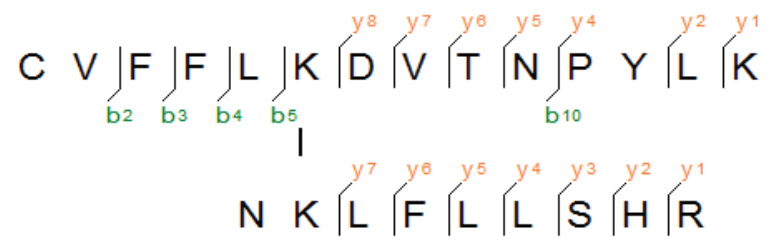

9.9e+003 PC\_A8\_140201121226.004040.004040.5.dta Seq: NVEDIHVALKR-IMKDFK Charge: 5

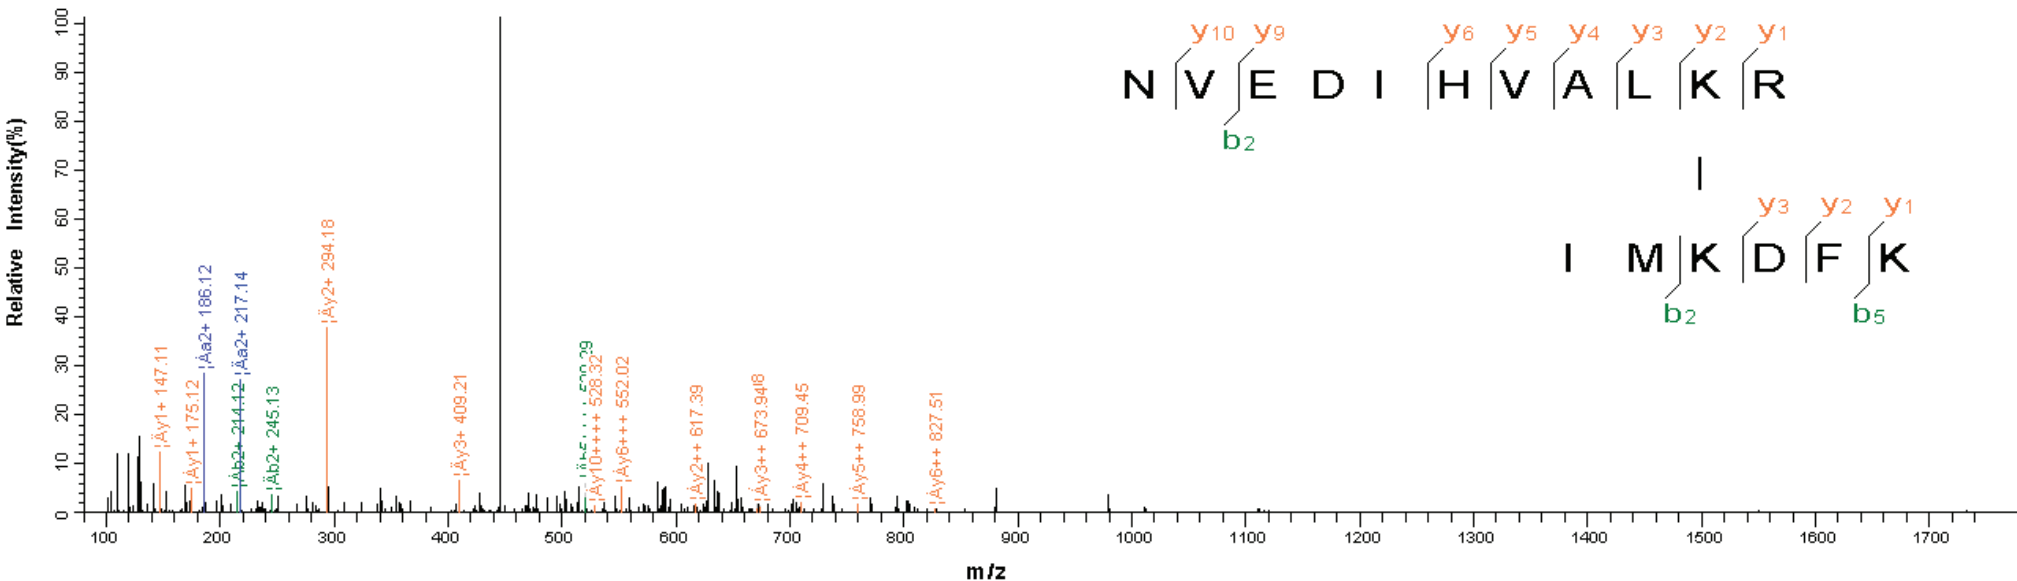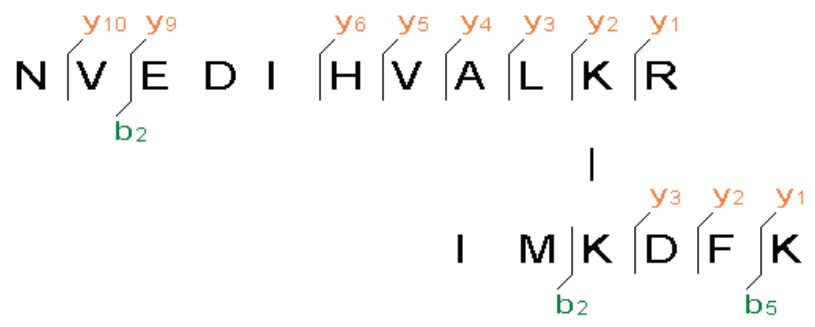

Seq: AFEKATQLDPNFAYAYTLQGHEHSSNDSSDSAK-AFEKATQLDPNFAYAYTLQGHEHSSNDSSDSAK

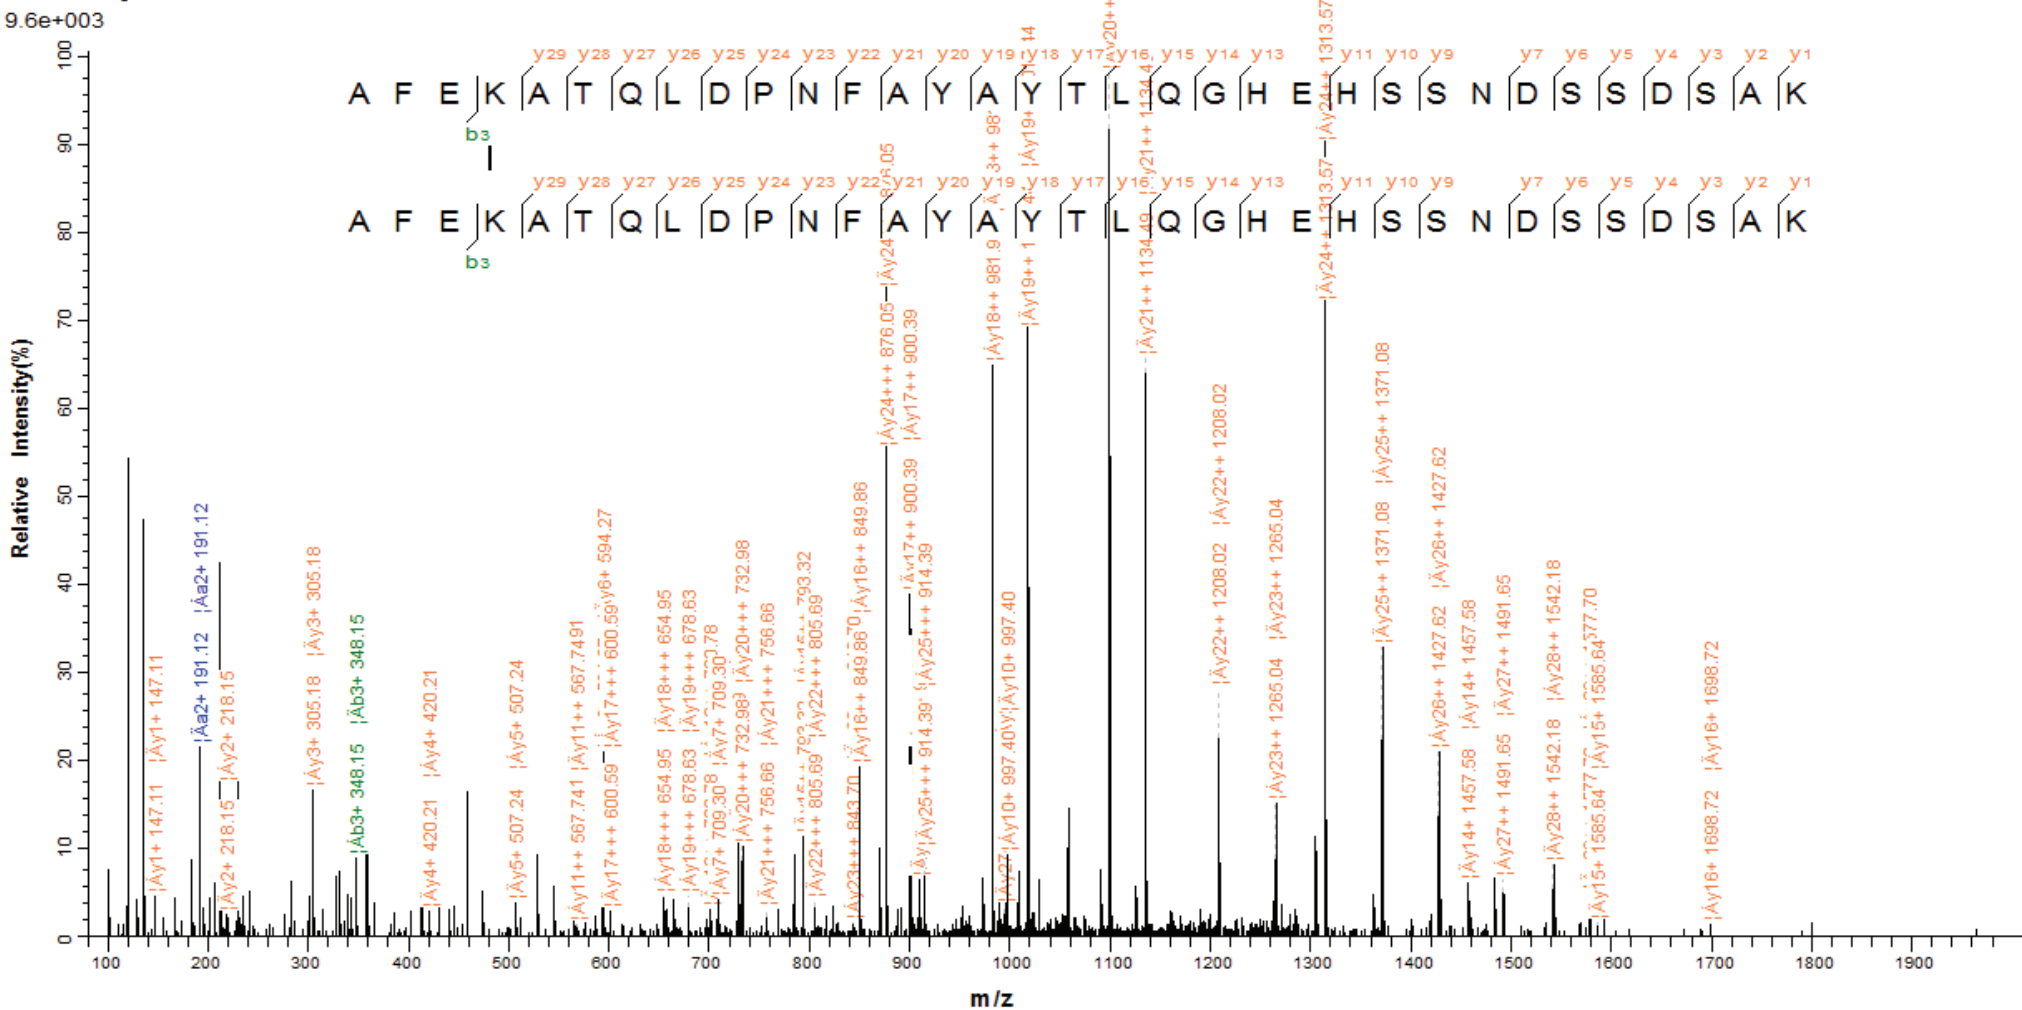

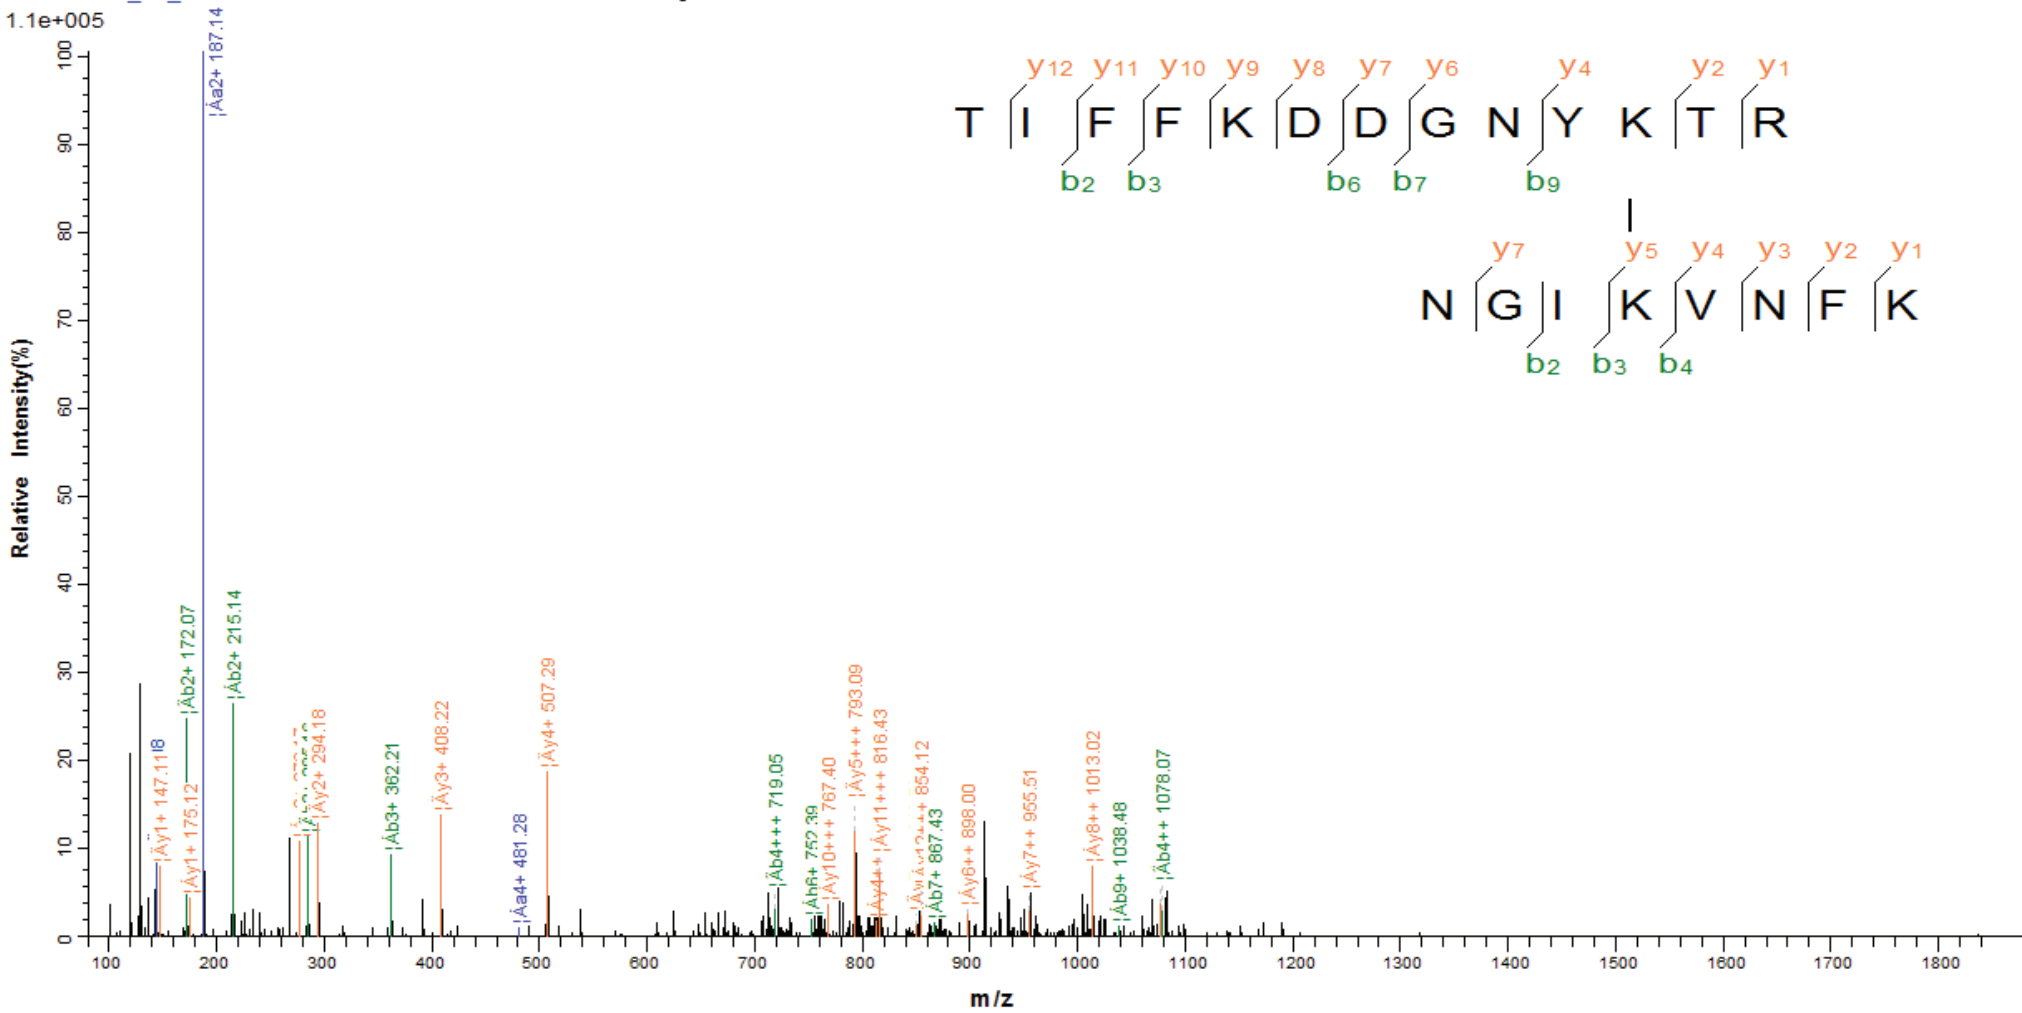

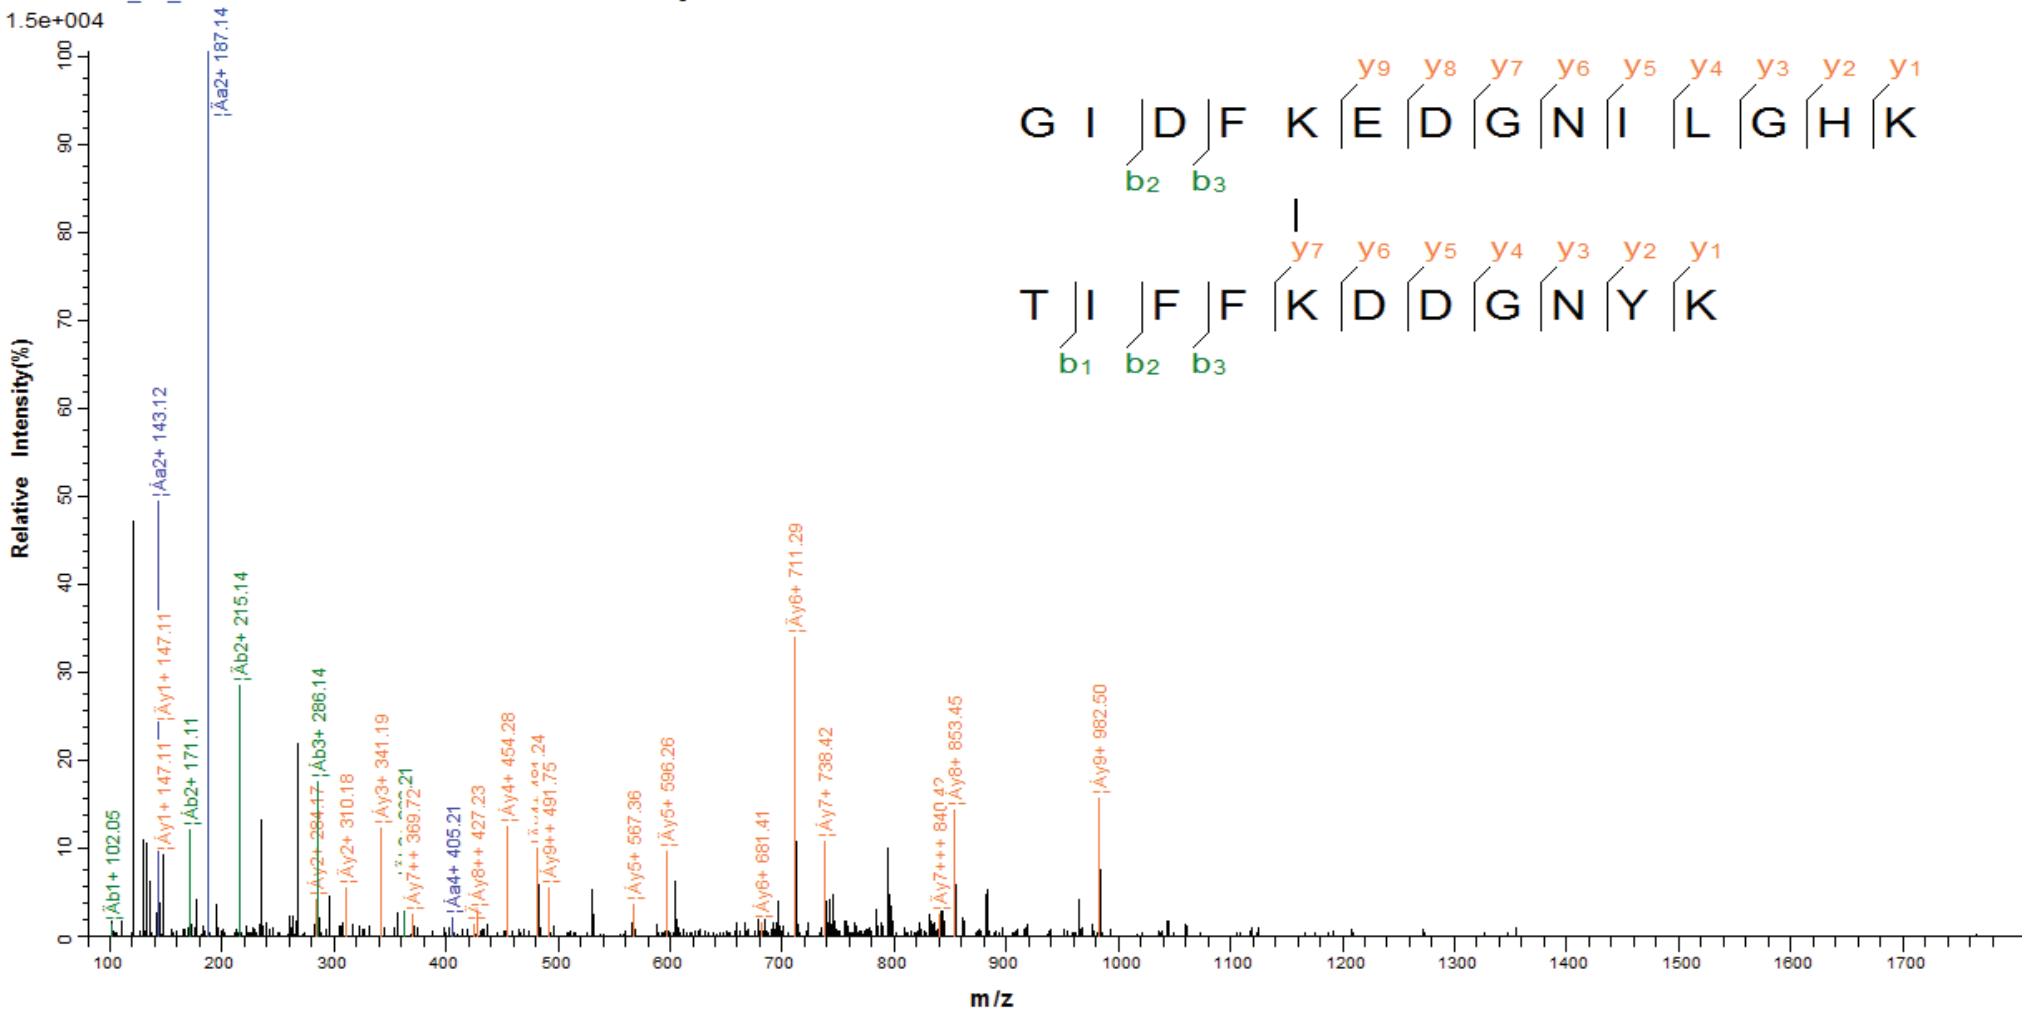

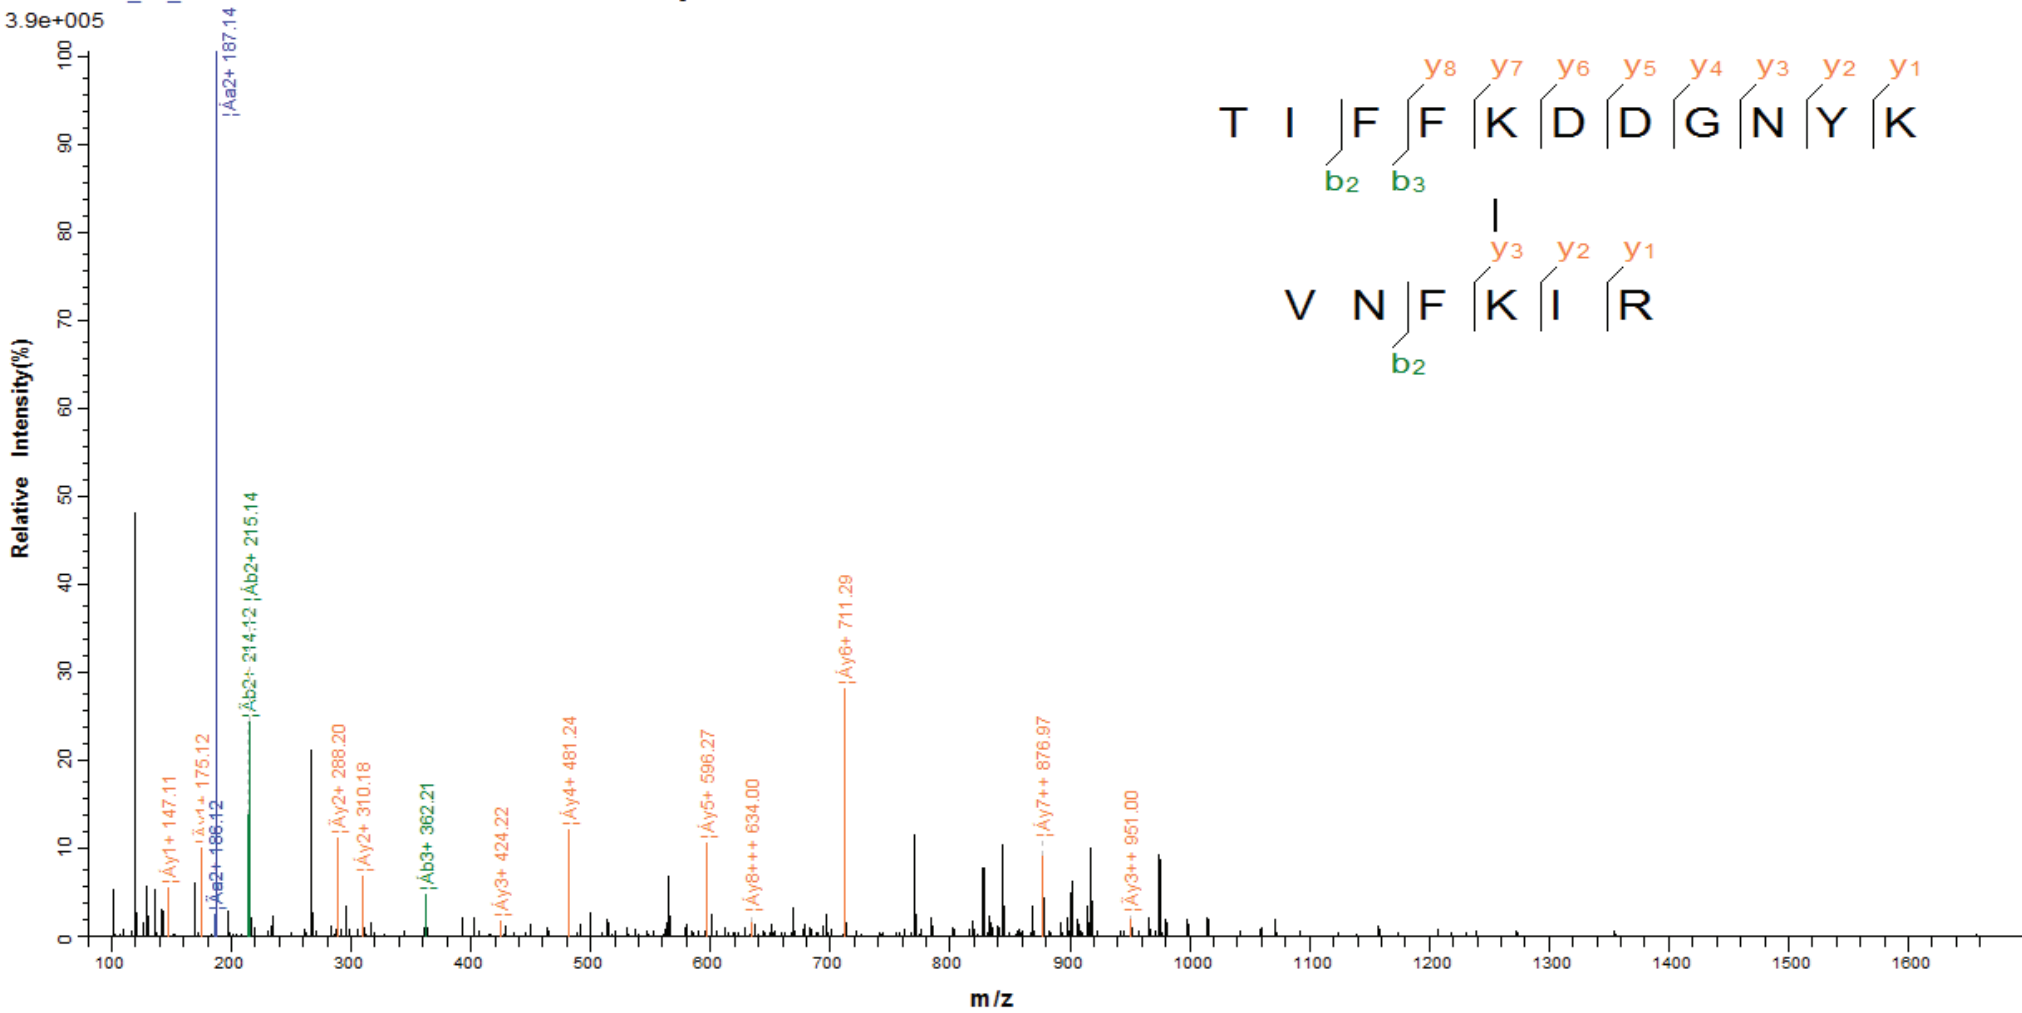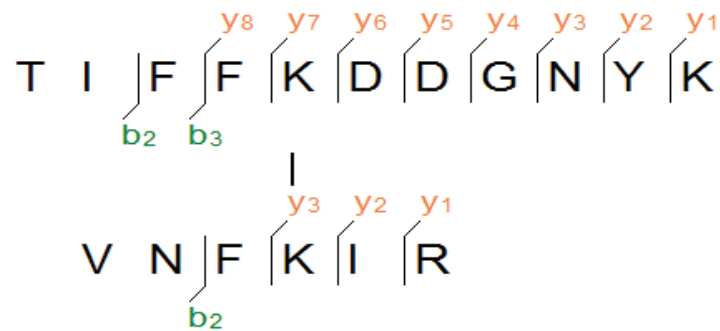

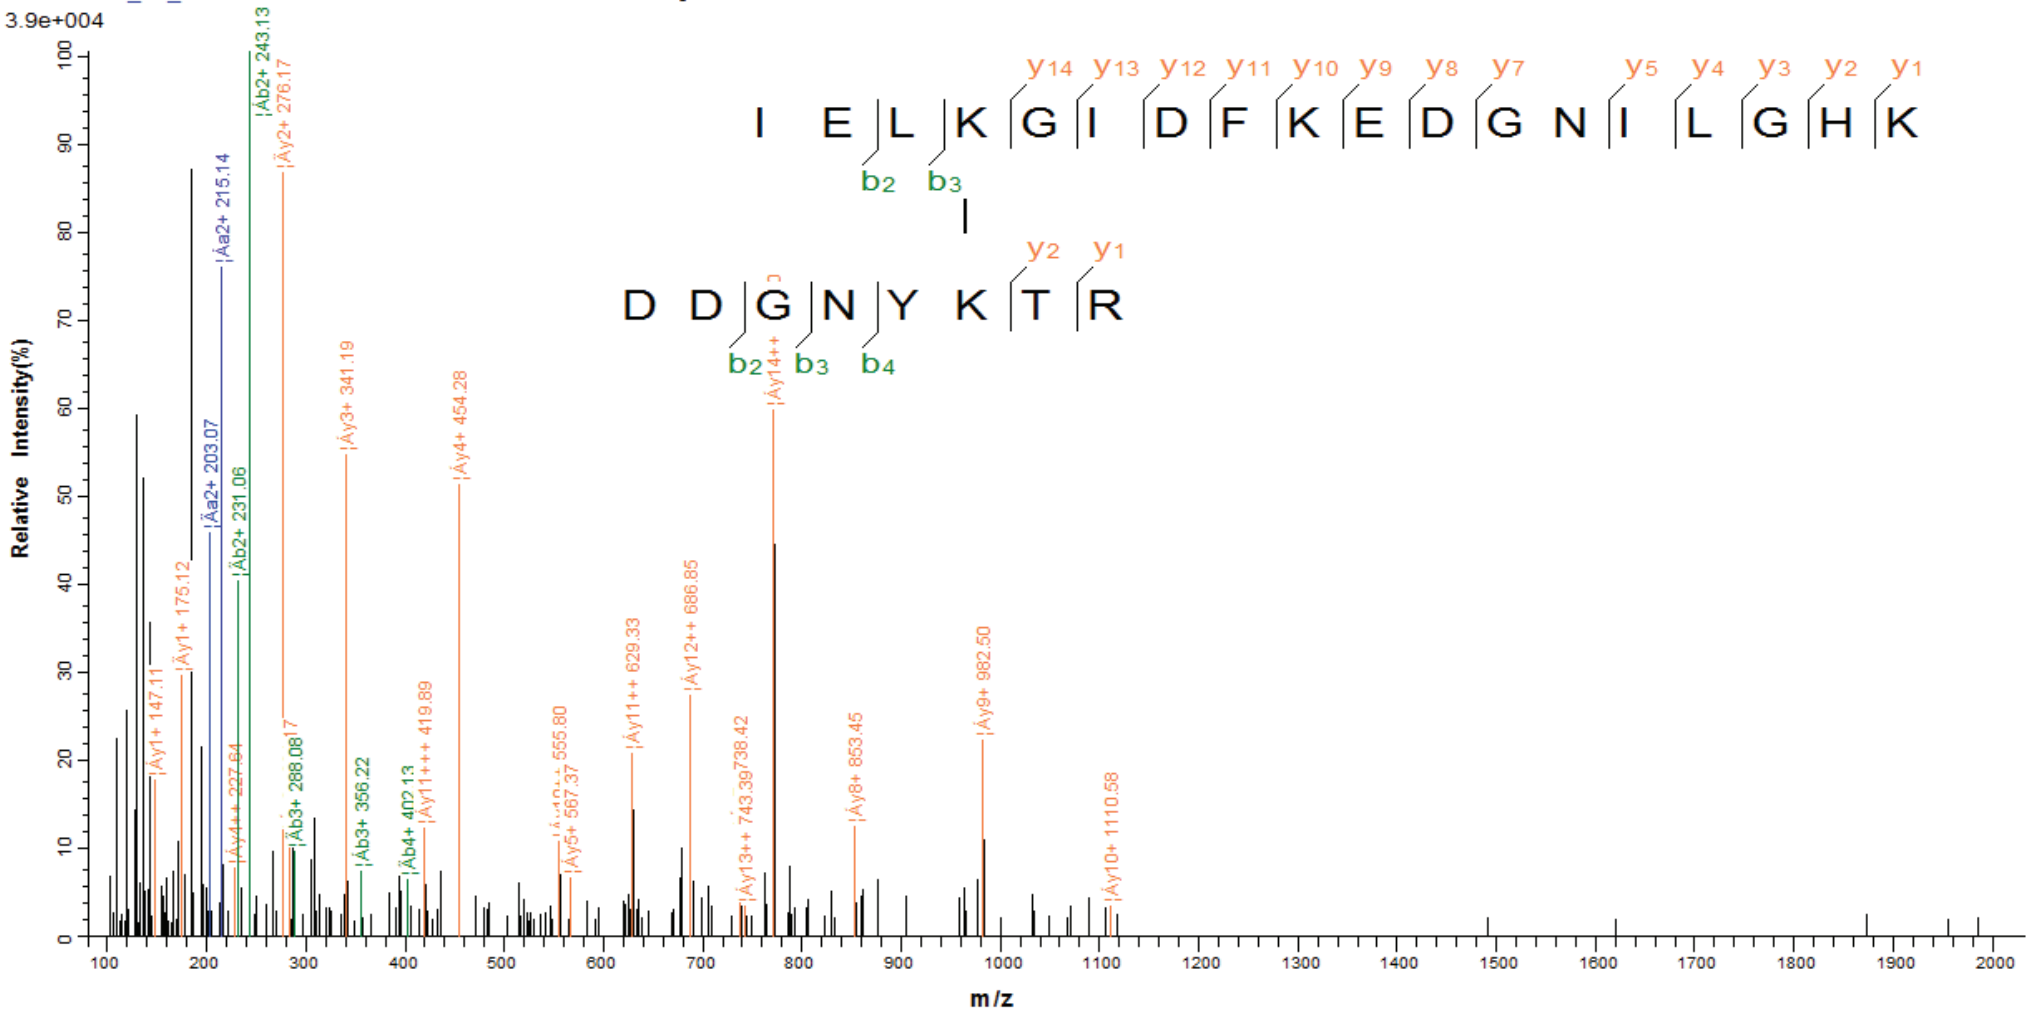

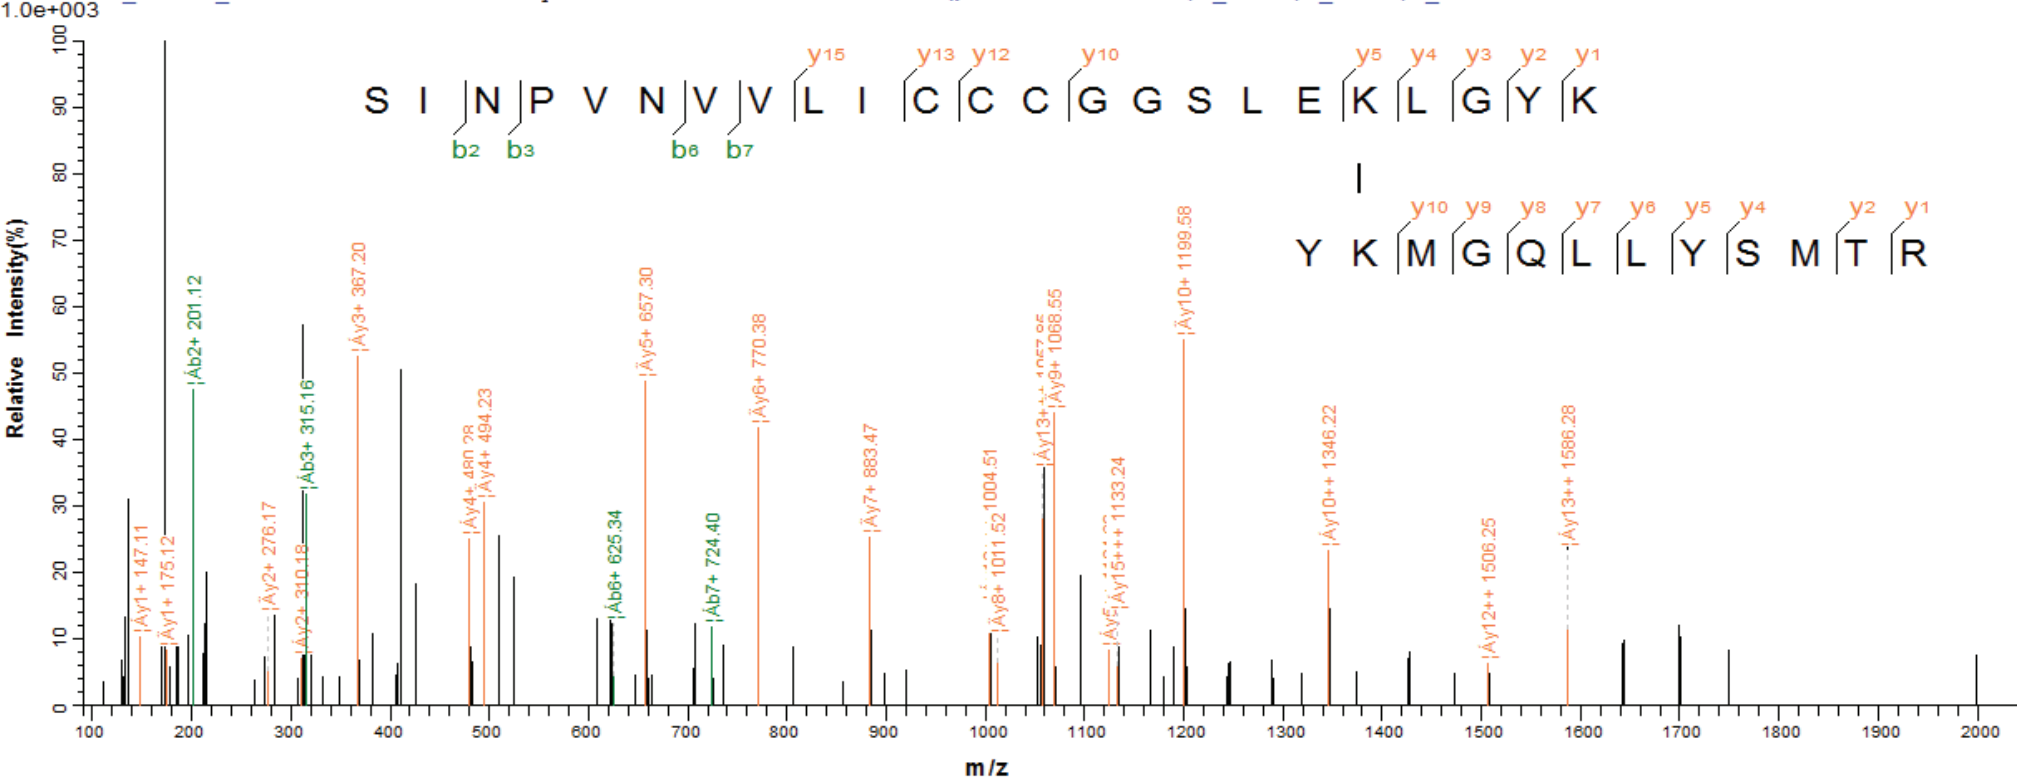



APC\_052314\_A8.2613.2613.4.dta Seq: KLNENEIAIKCFR-KLQK Mod: 11,C\_57

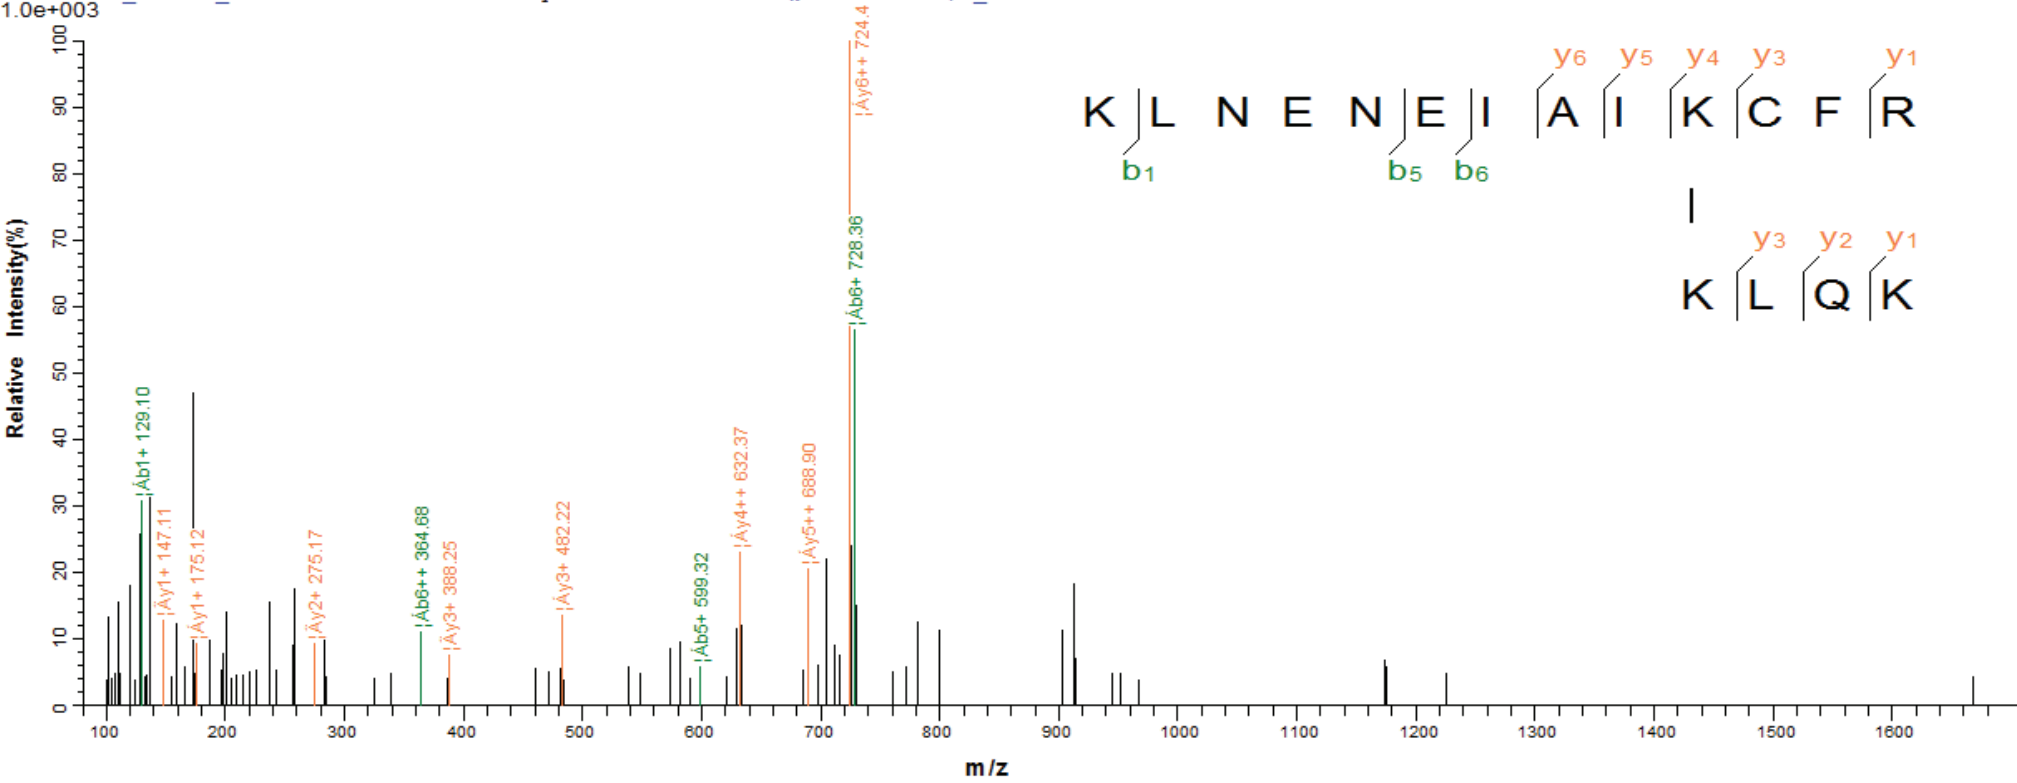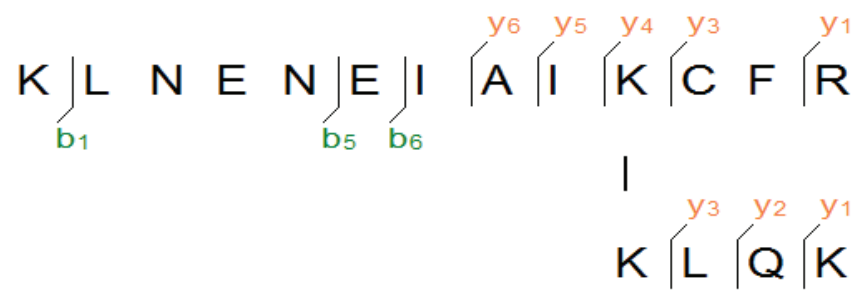

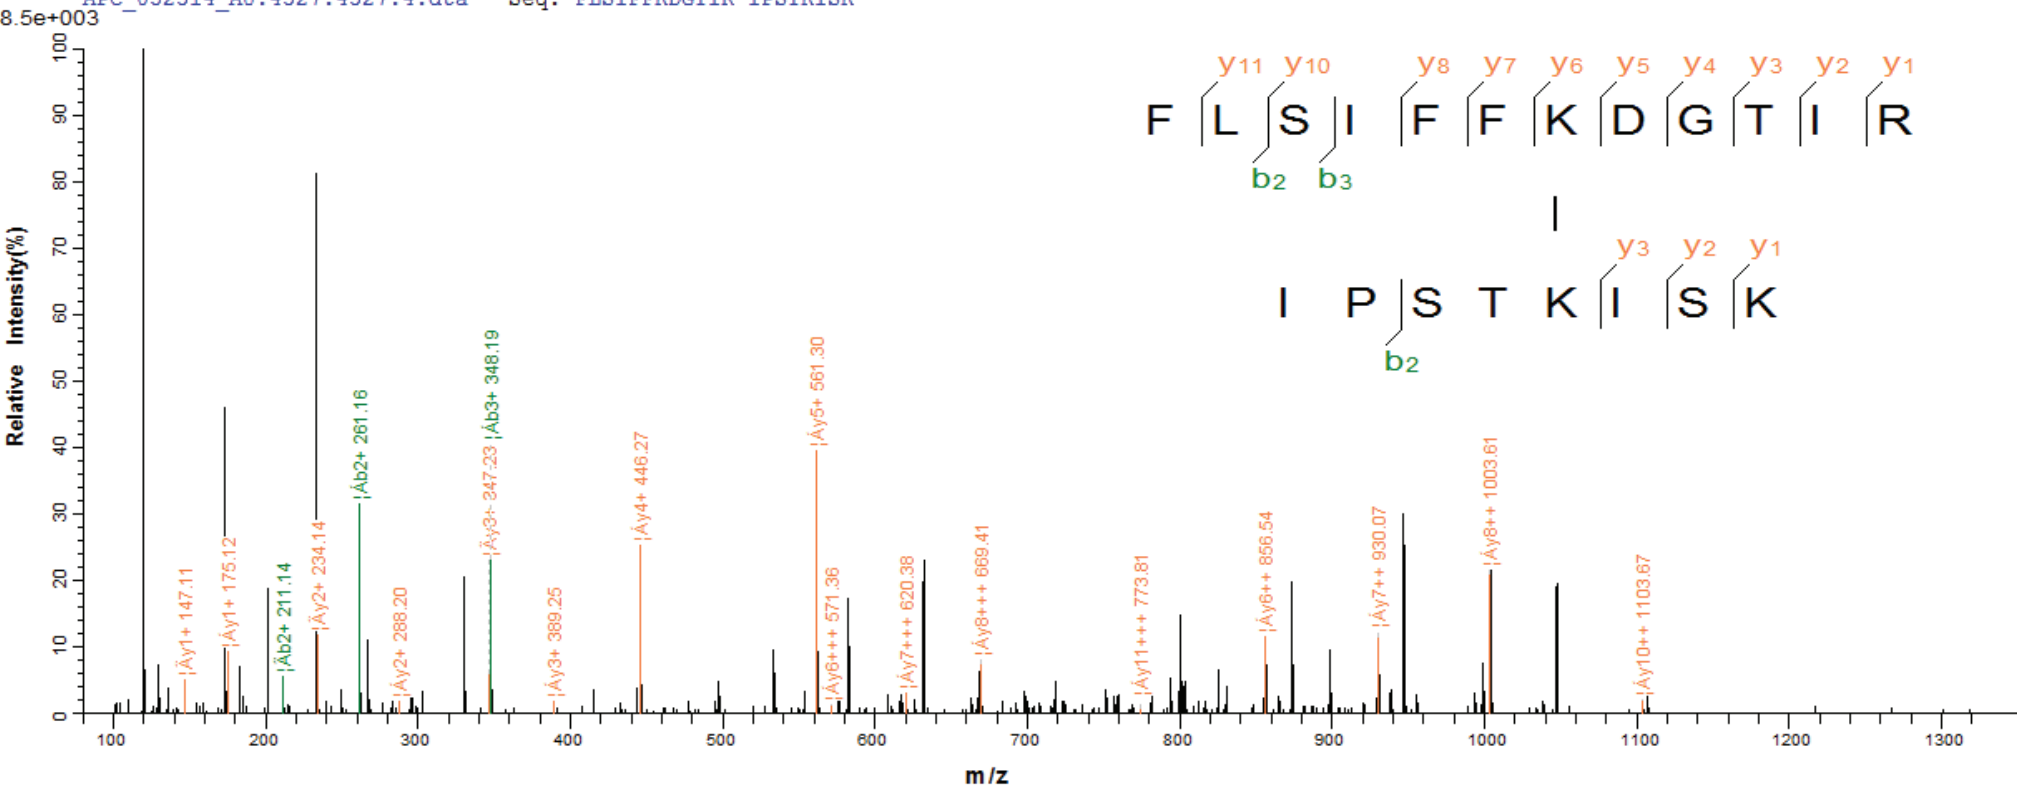

APC\_052314\_A8.3039.3039.4.dta Seq: NVEDIHVALKR-KSESVFENK

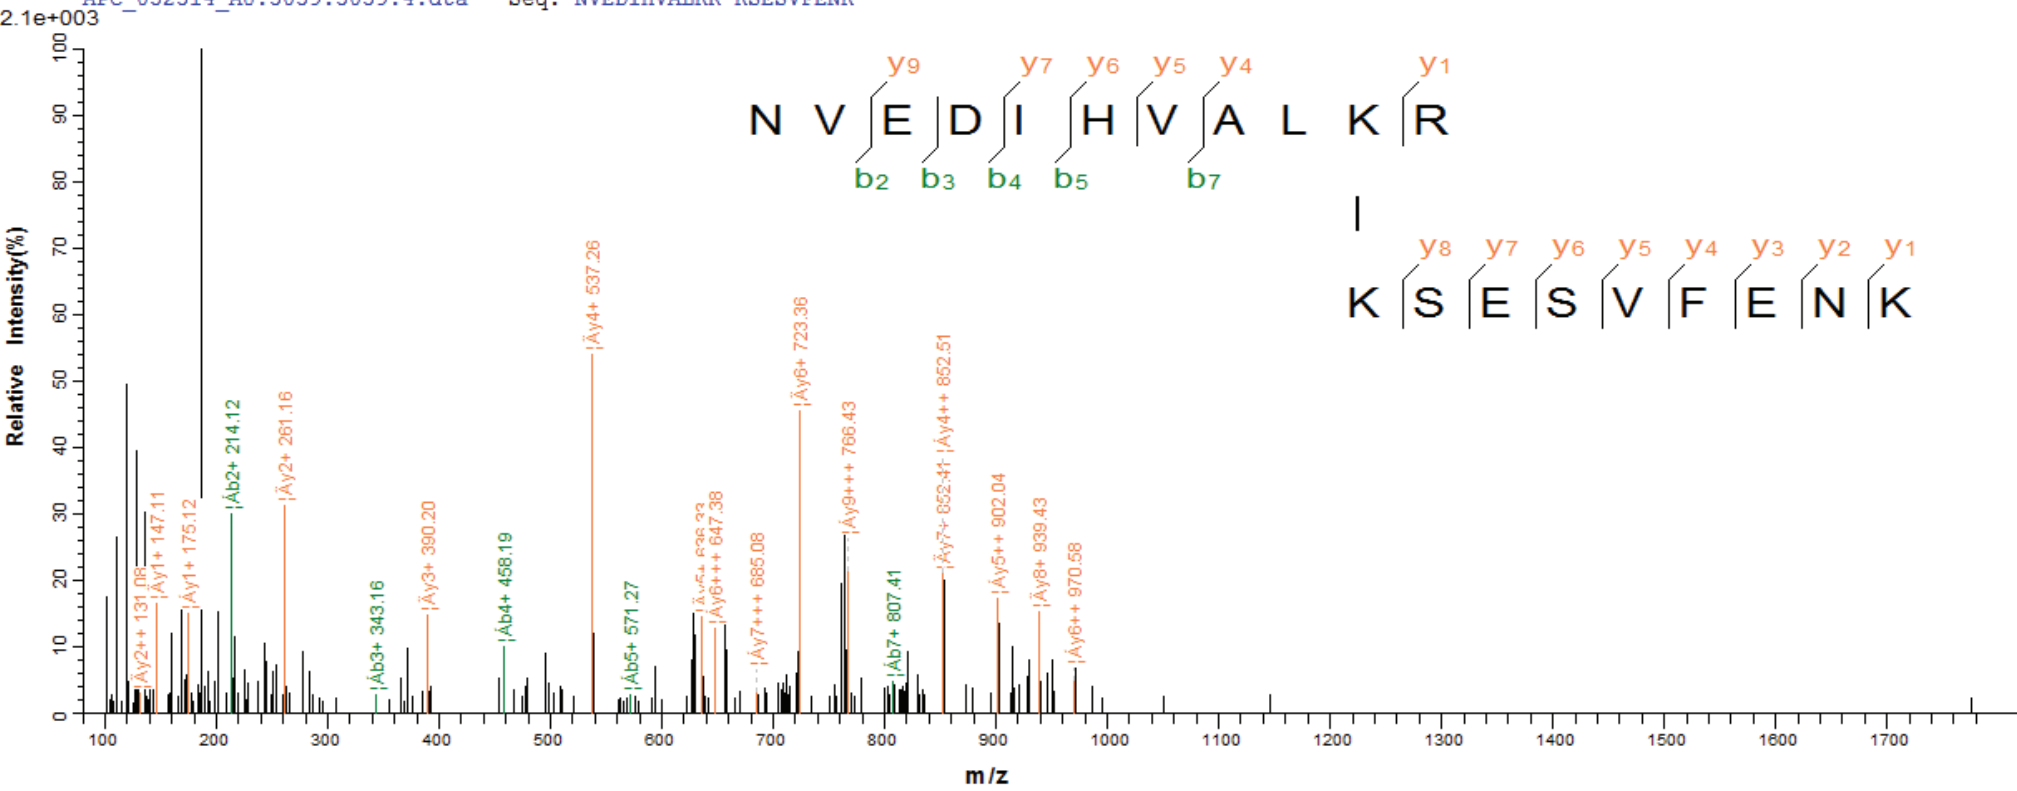

APC\_052314\_A8.2499.2499.4.dta

Seq: EYKDSVDGVVRR

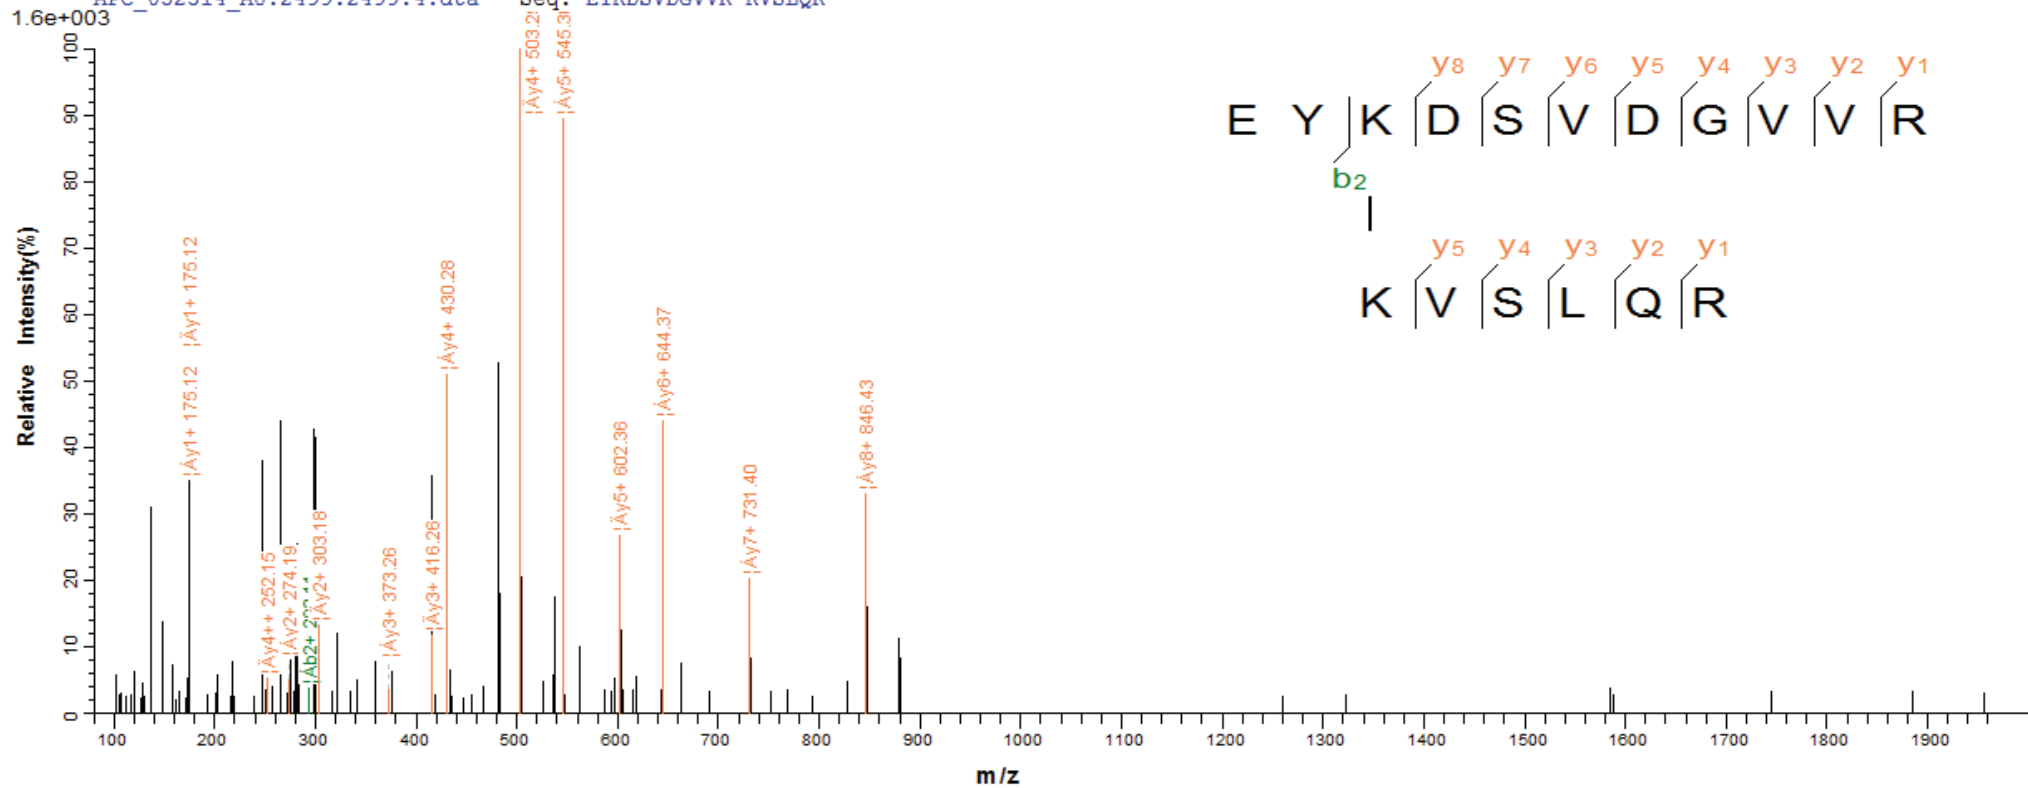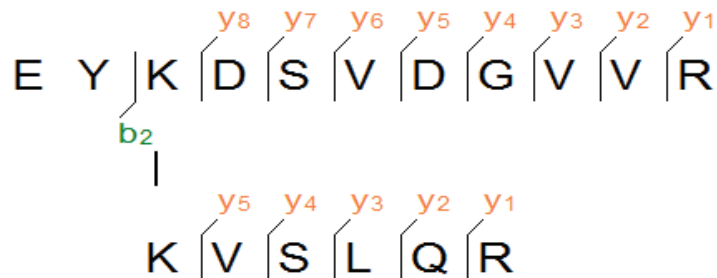

APC\_052314\_A8.3813.3813.5.dta

Seq: ENRENDDFIAC T A K V S V D G R

Mod: 11, C\_57

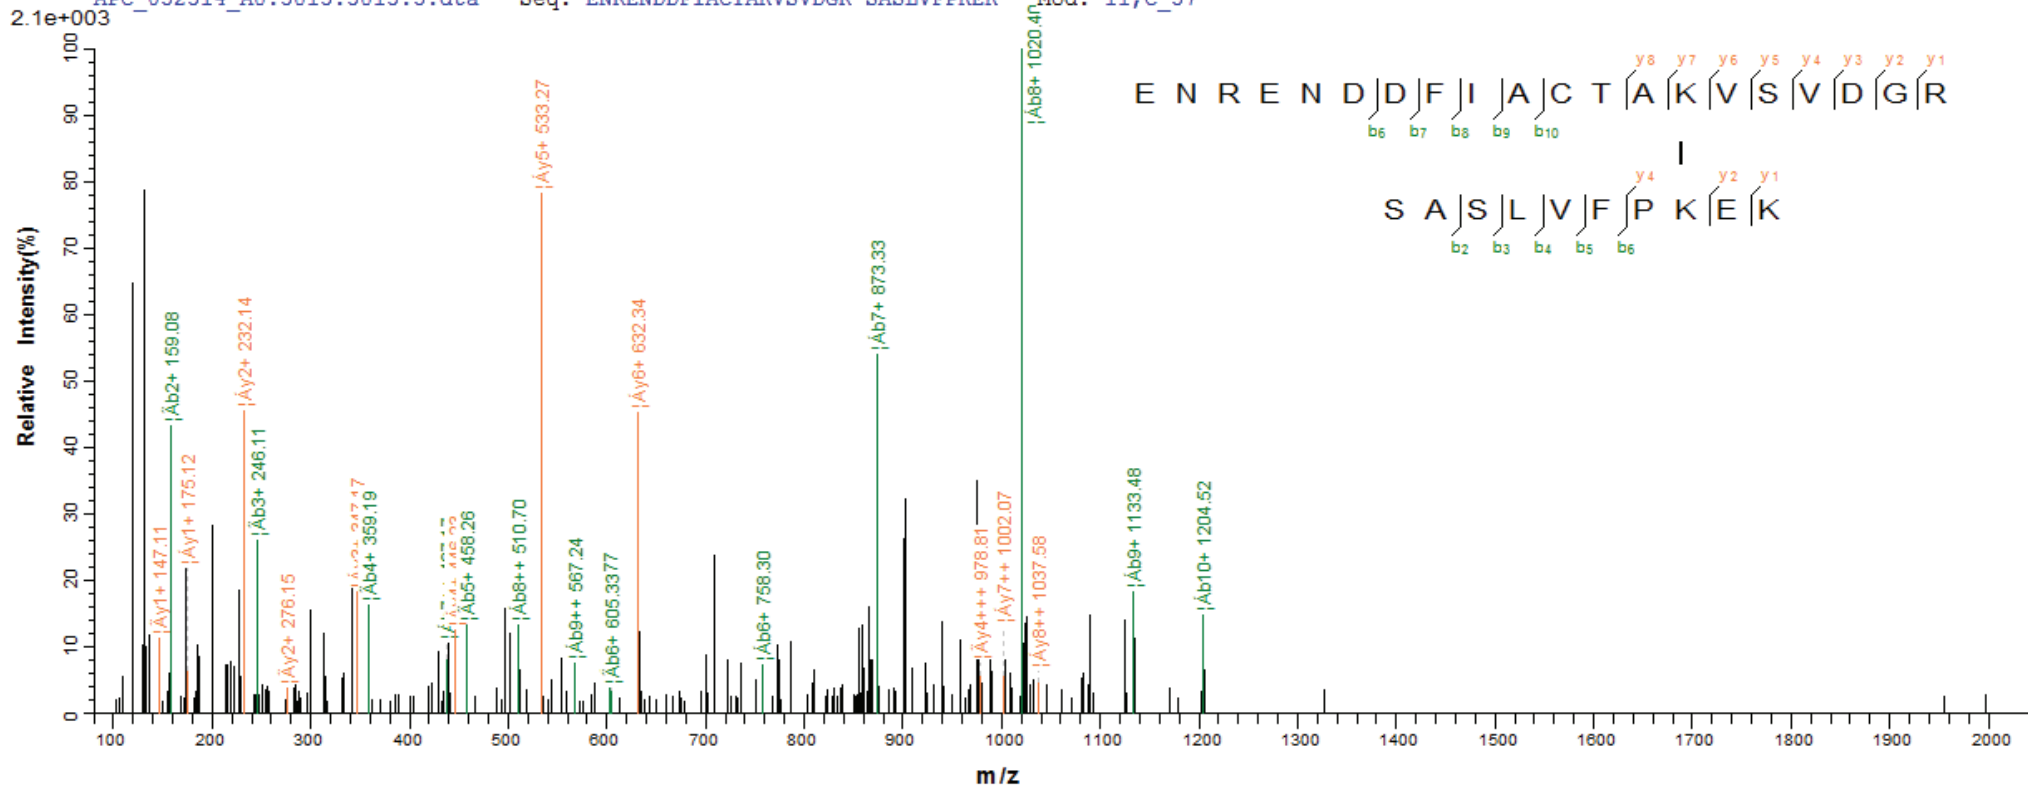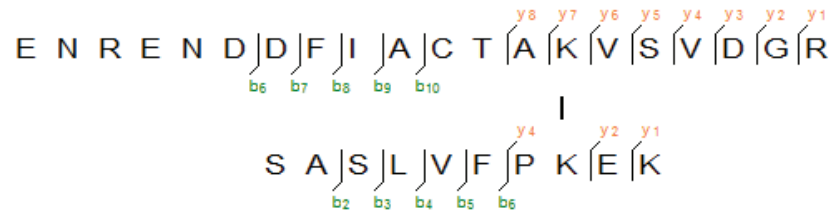

APC\_052314\_A8.4366.4366.5.dta

Seq: KMHEVAGLDPIIFPK

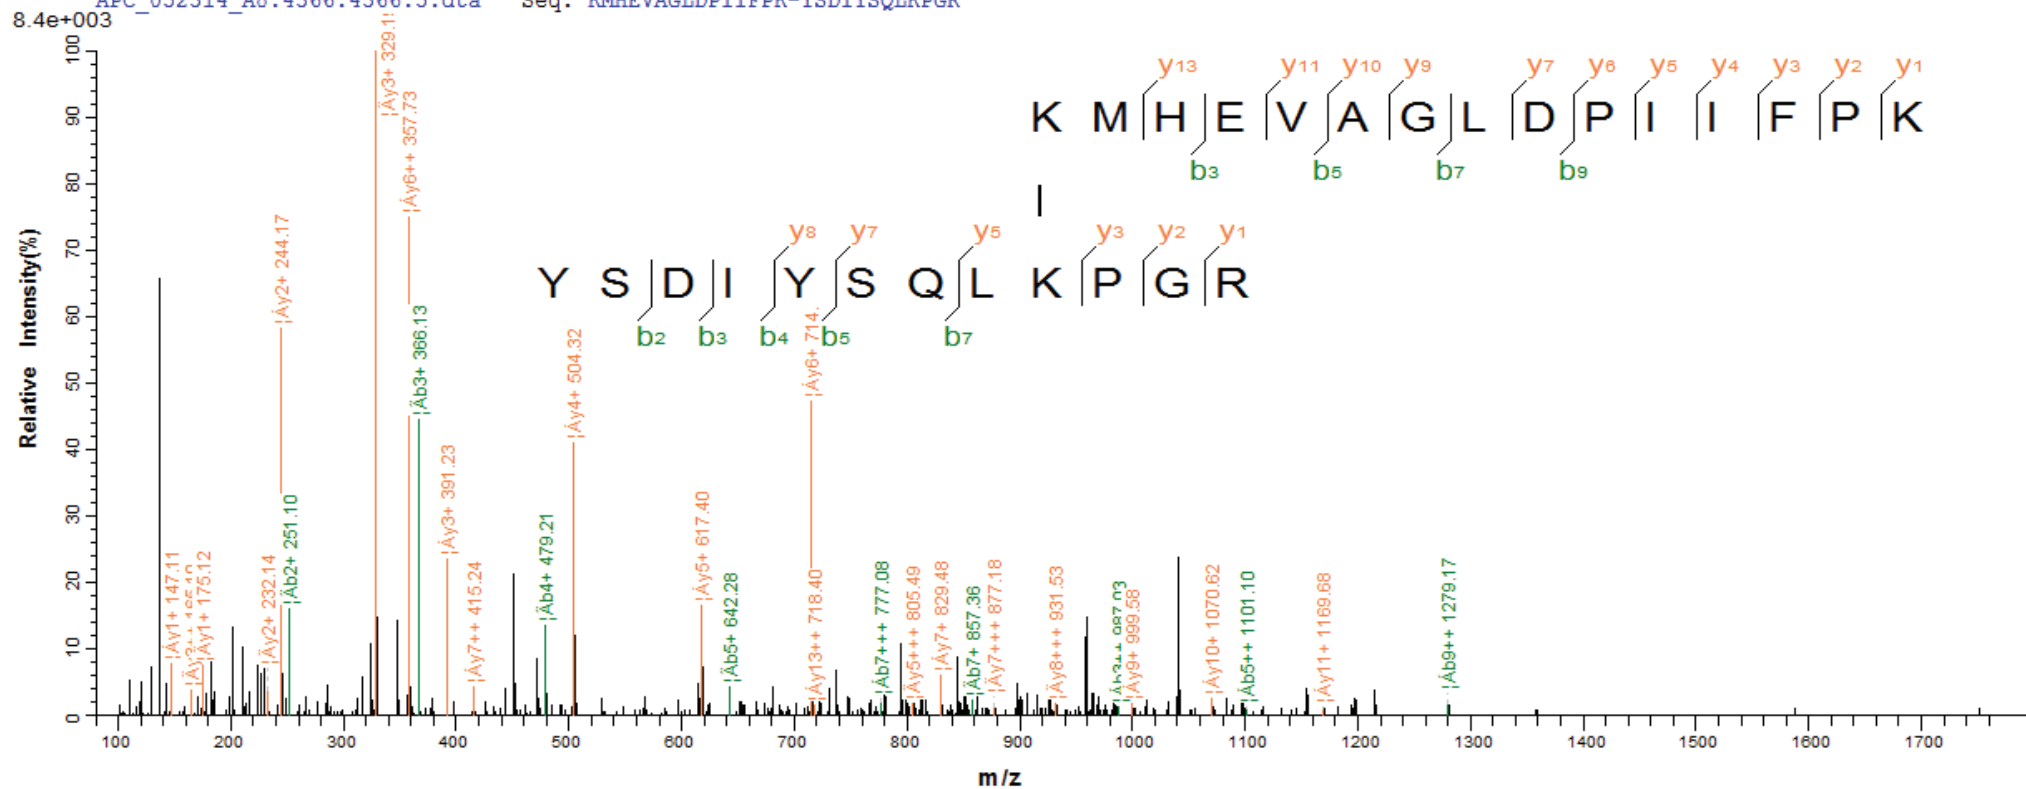

APC\_052314\_A8.3981.3981.5.dta Seq: VKMHGYFPLEVNF TK-KSESVFENK

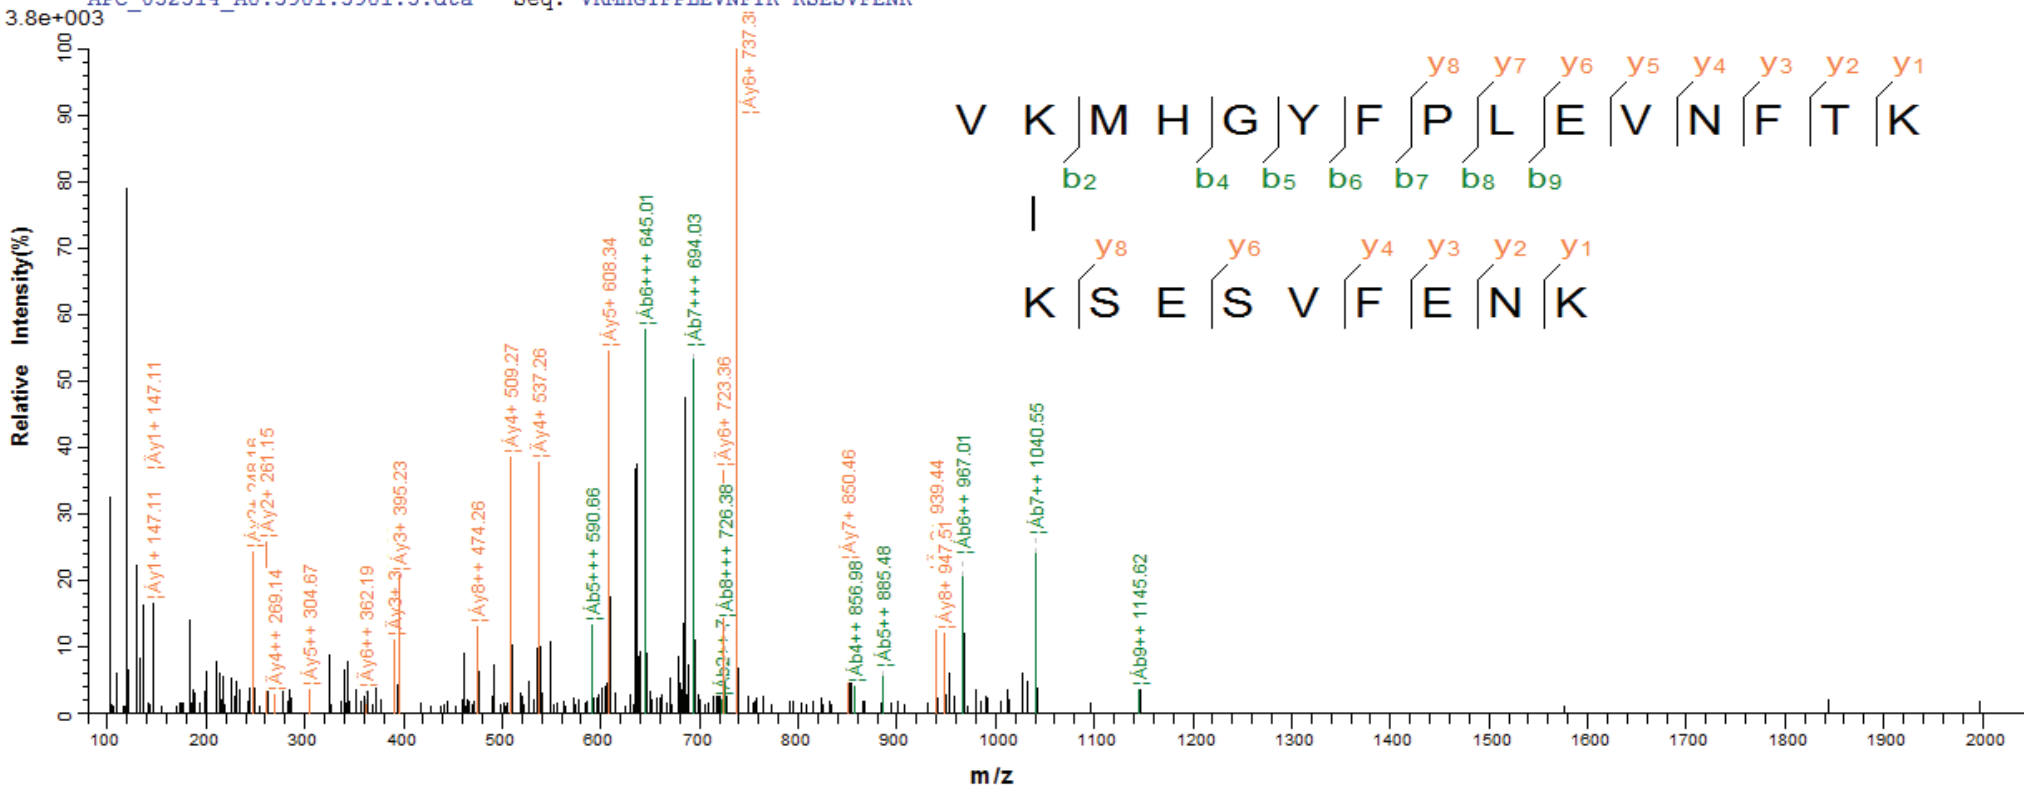

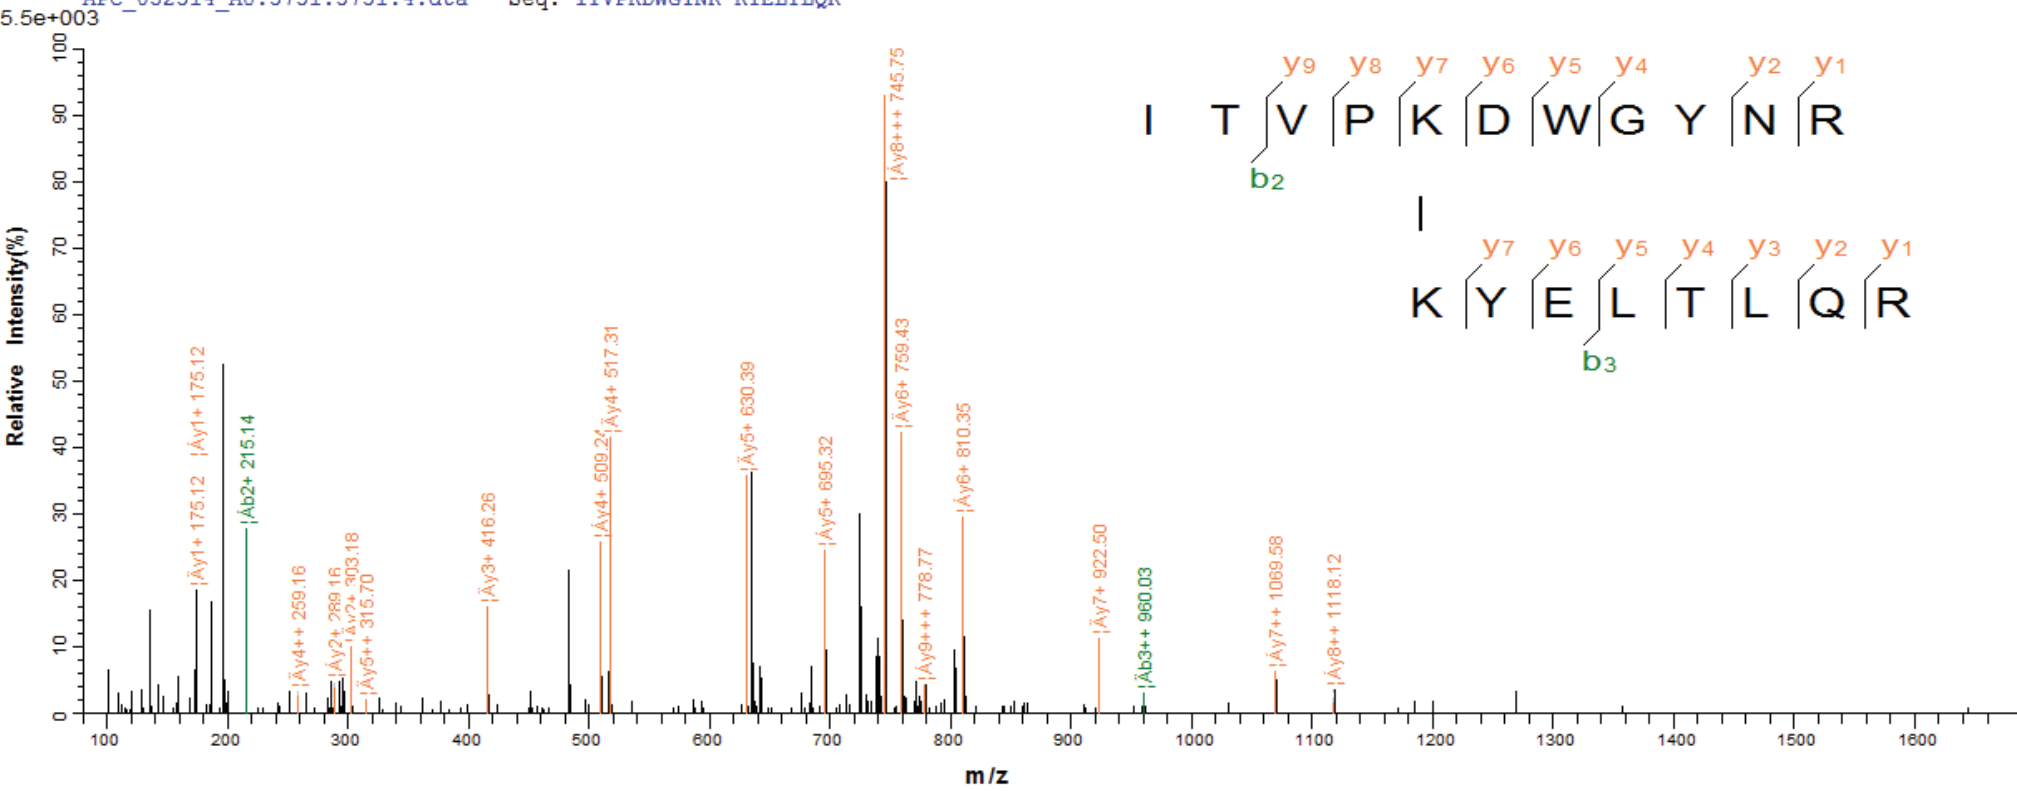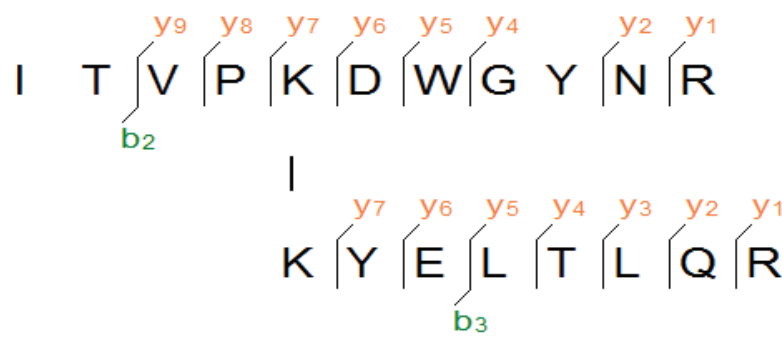



APC\_052314\_A8.2545.2545.5.dta Seq: QLLSPGKQFR-IKNTRPSTR

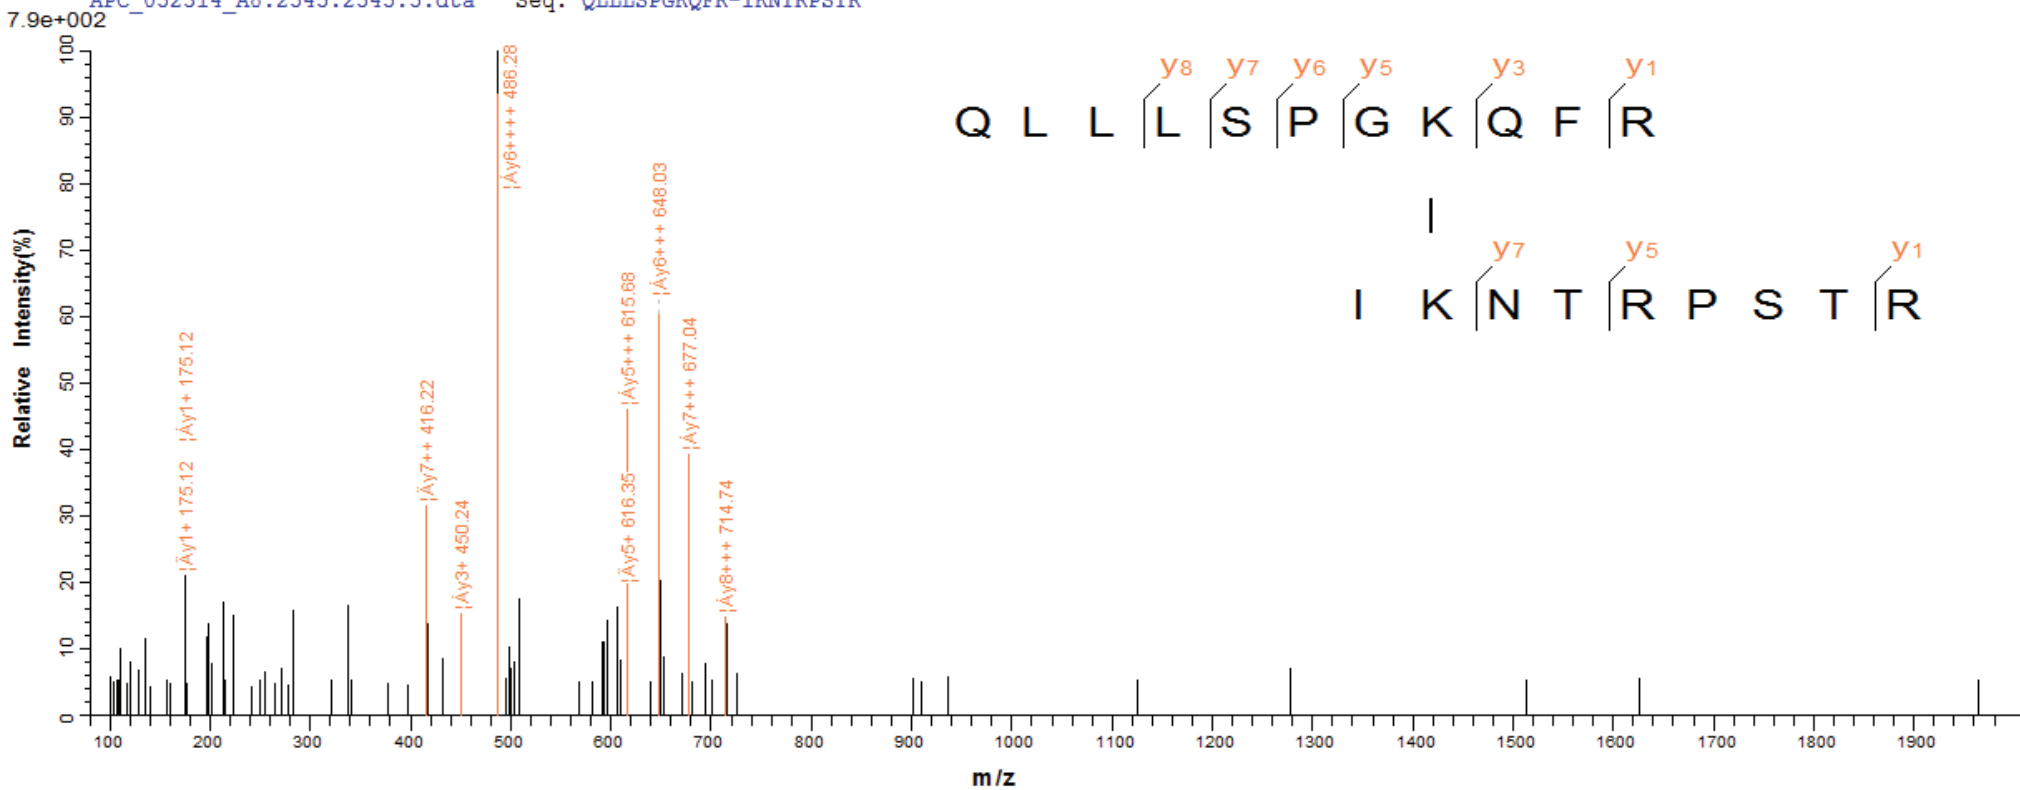

APC\_052314\_A8.1853.1853.4.dta Seq: KVSLQR-KVSLQR

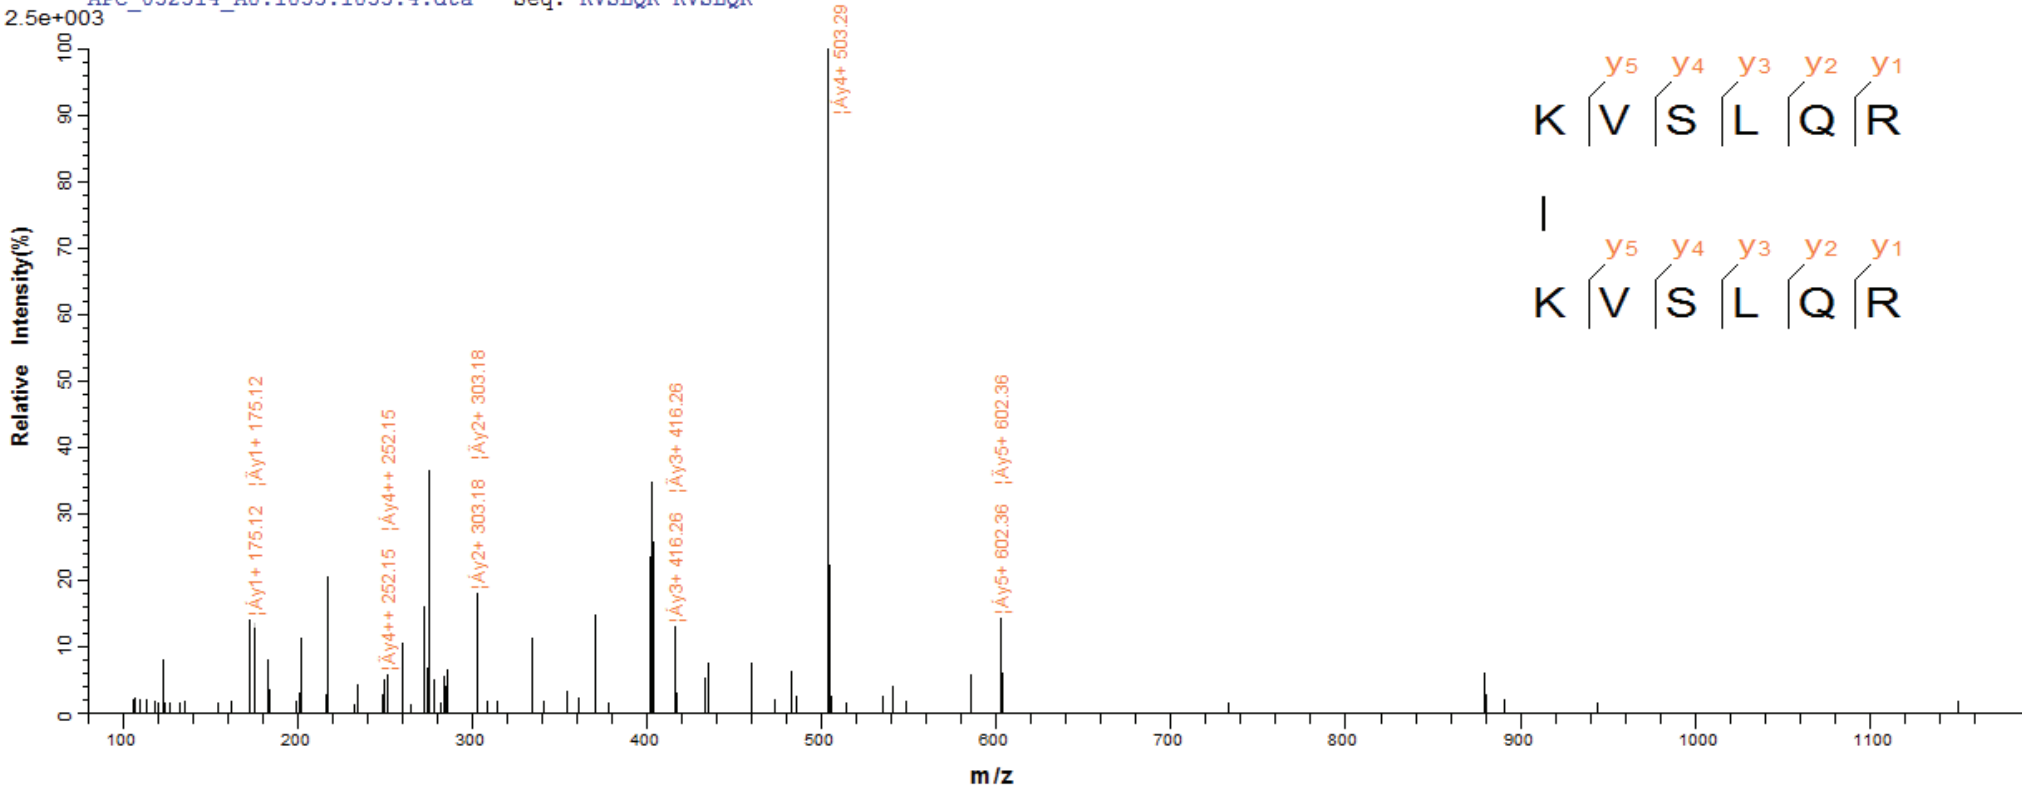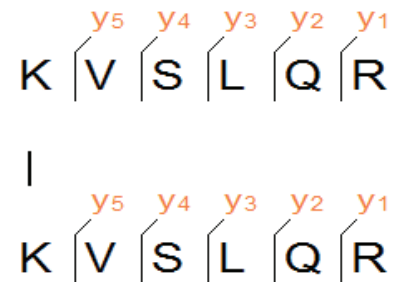

APC\_052314\_A8.4541.4541.5.dta Seq: KLYIGTLKDENLGIISK-IPALFKSYR

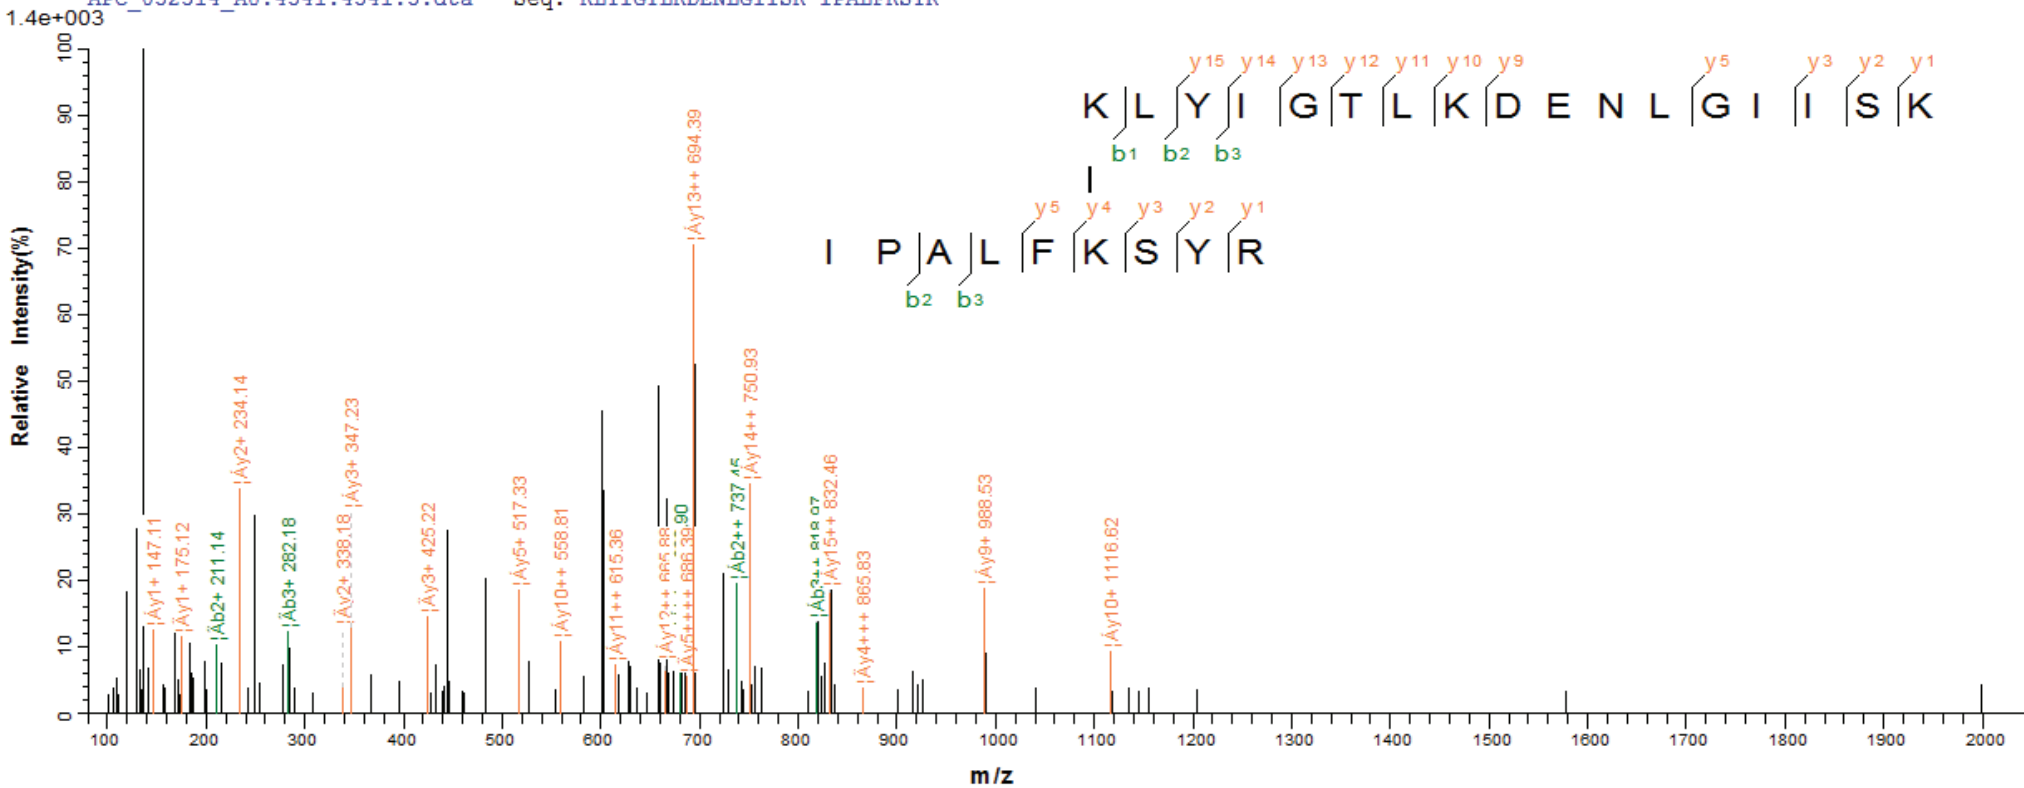

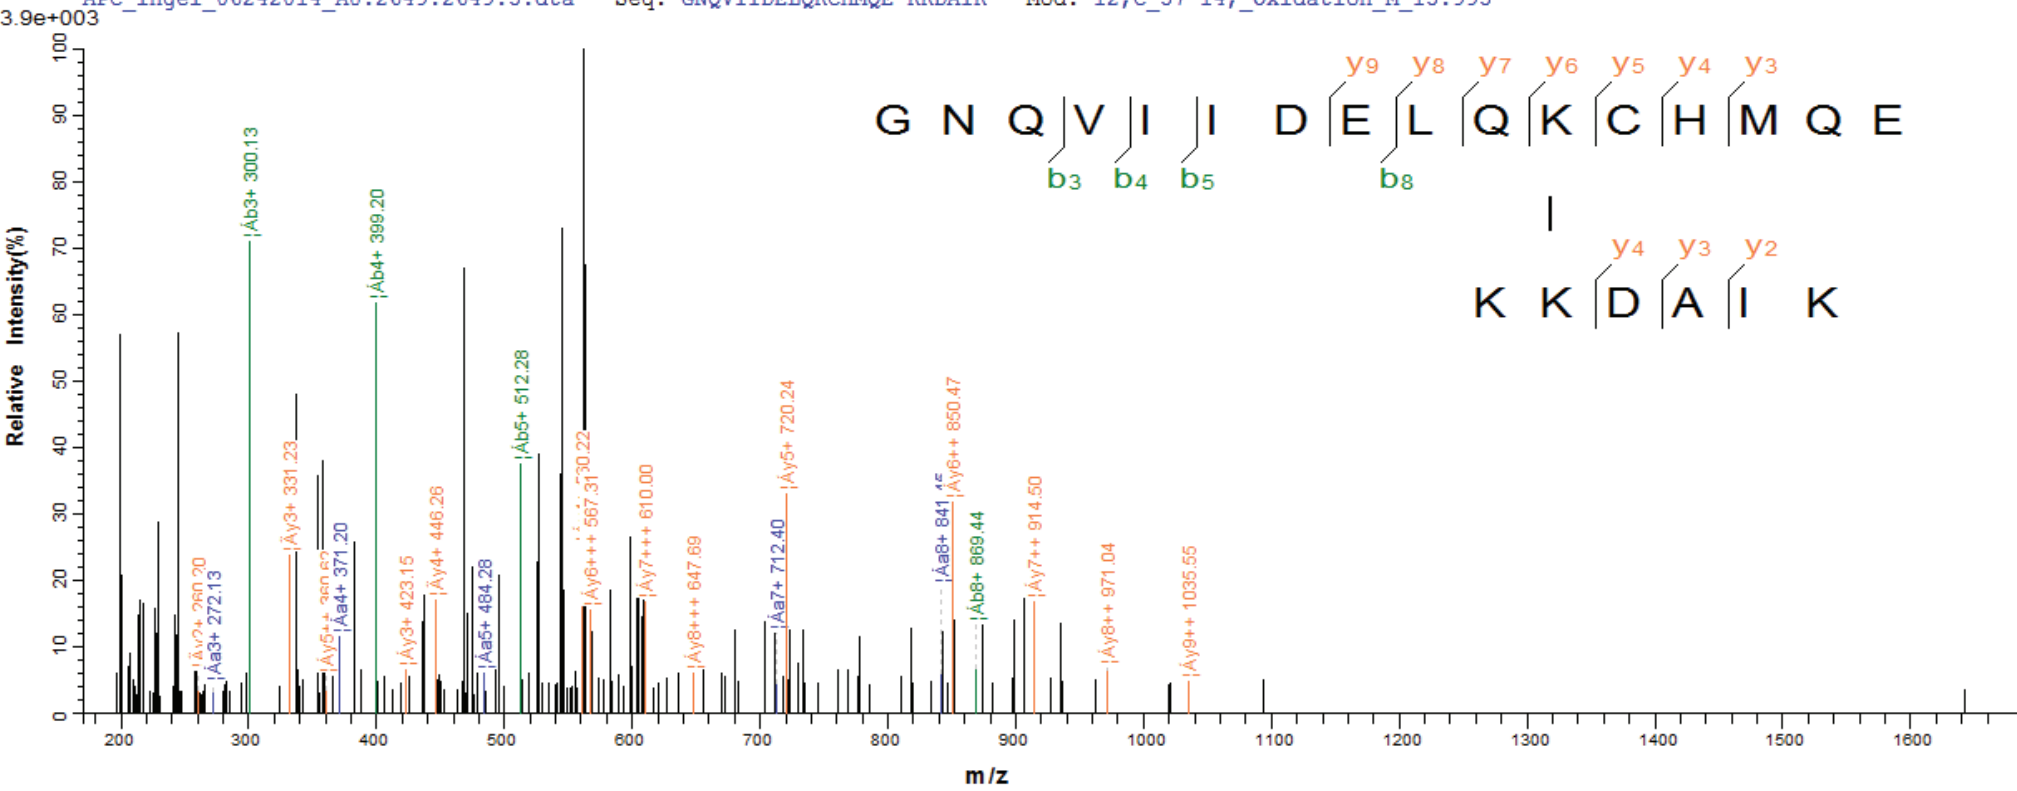

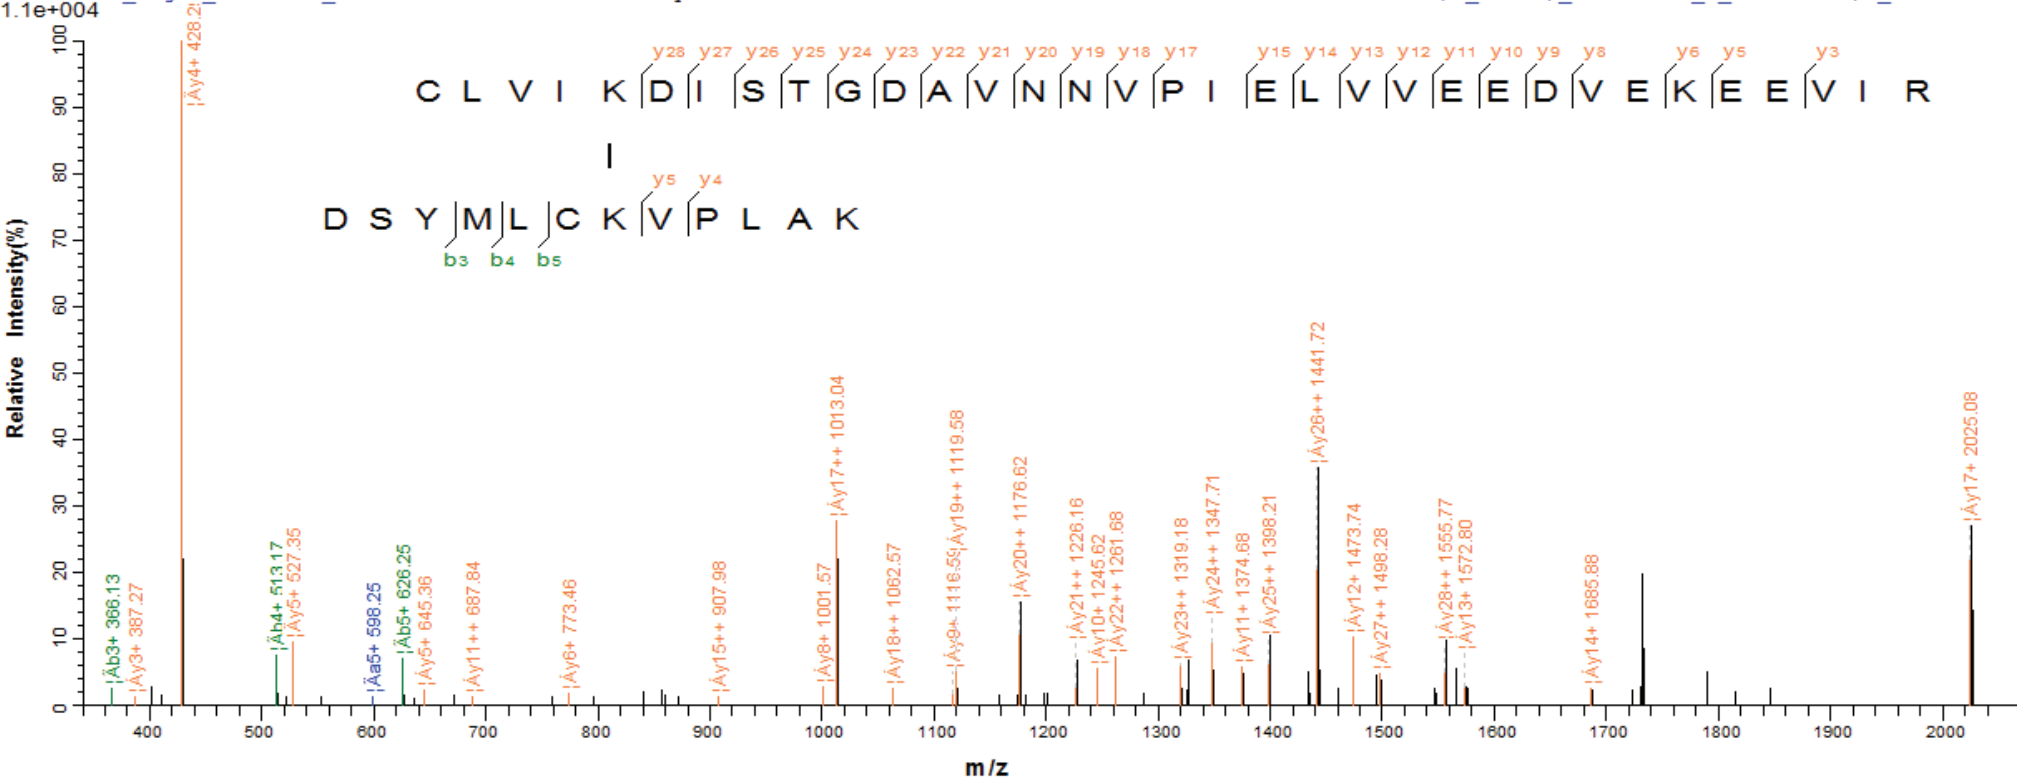

APC\_ingel\_06242014\_A8.5111.5111.4.dta Seq: YINTEDITKSNEILAK-DYKLADNVVVR

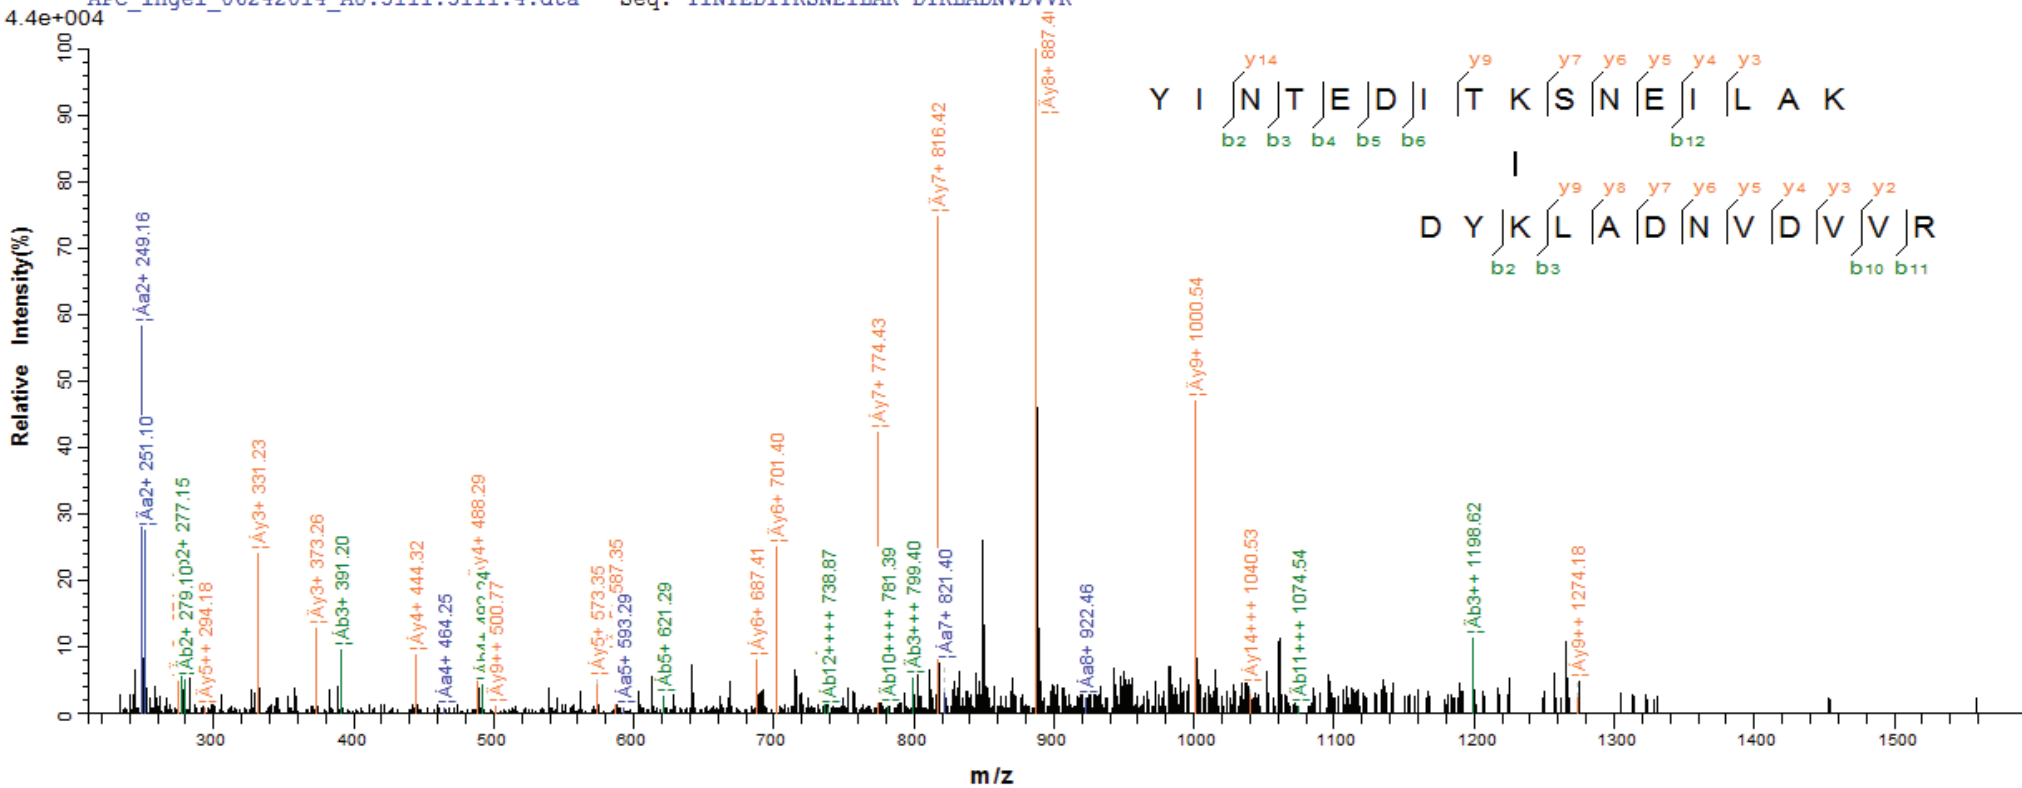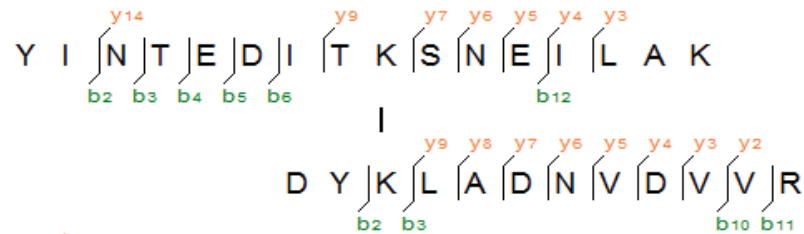

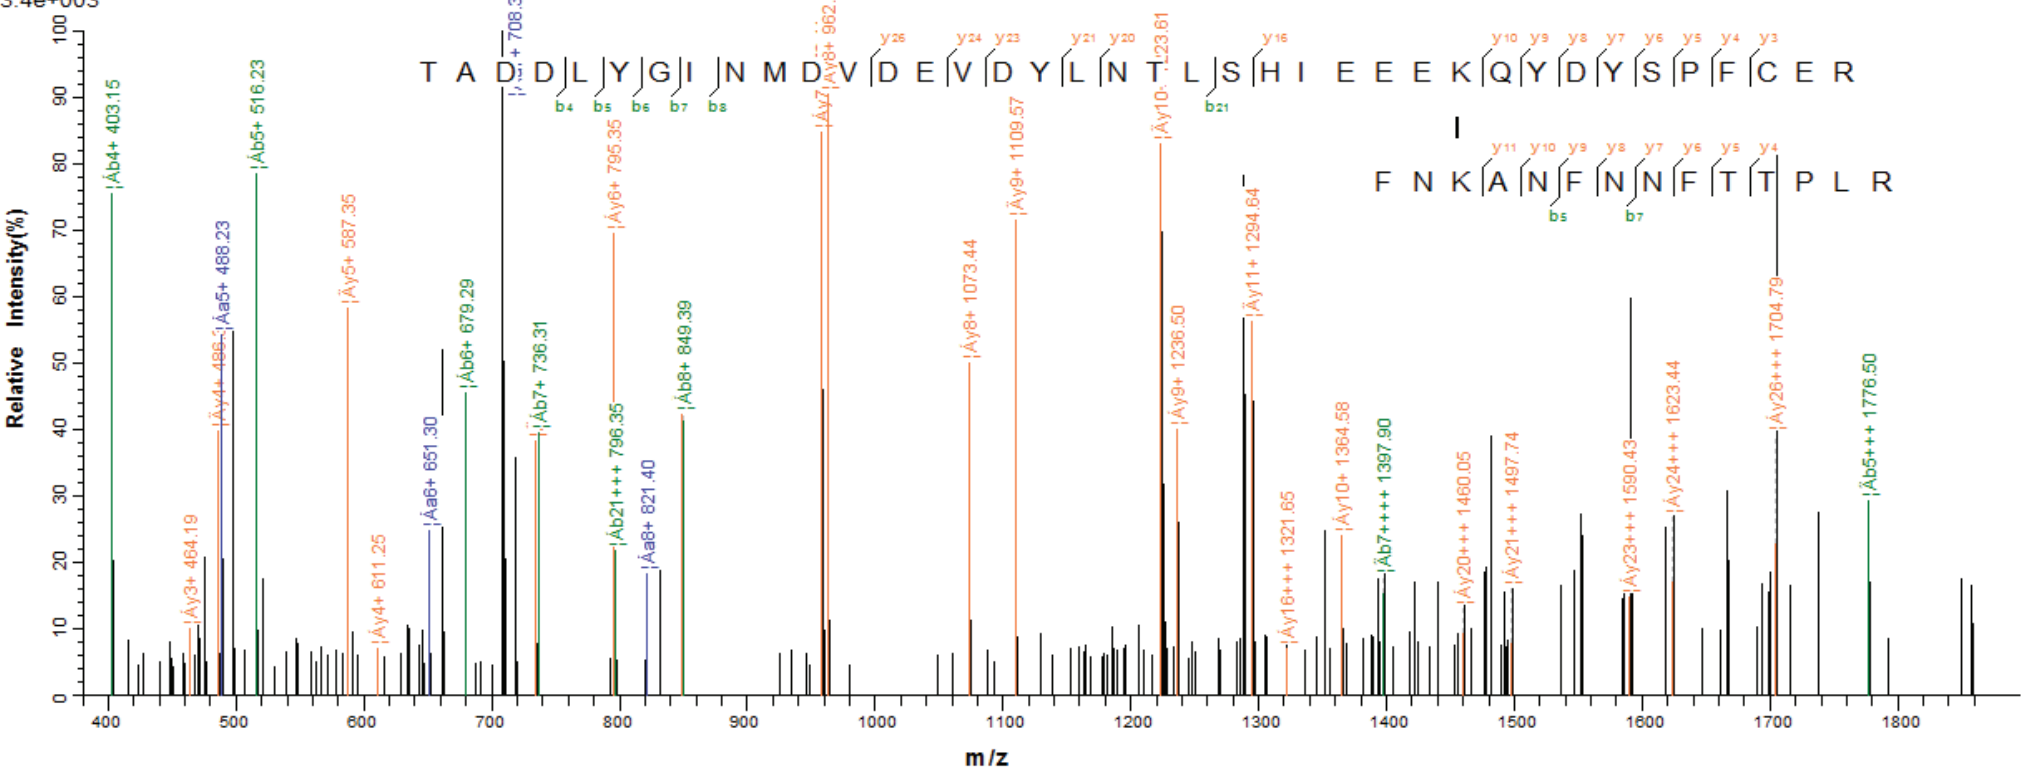

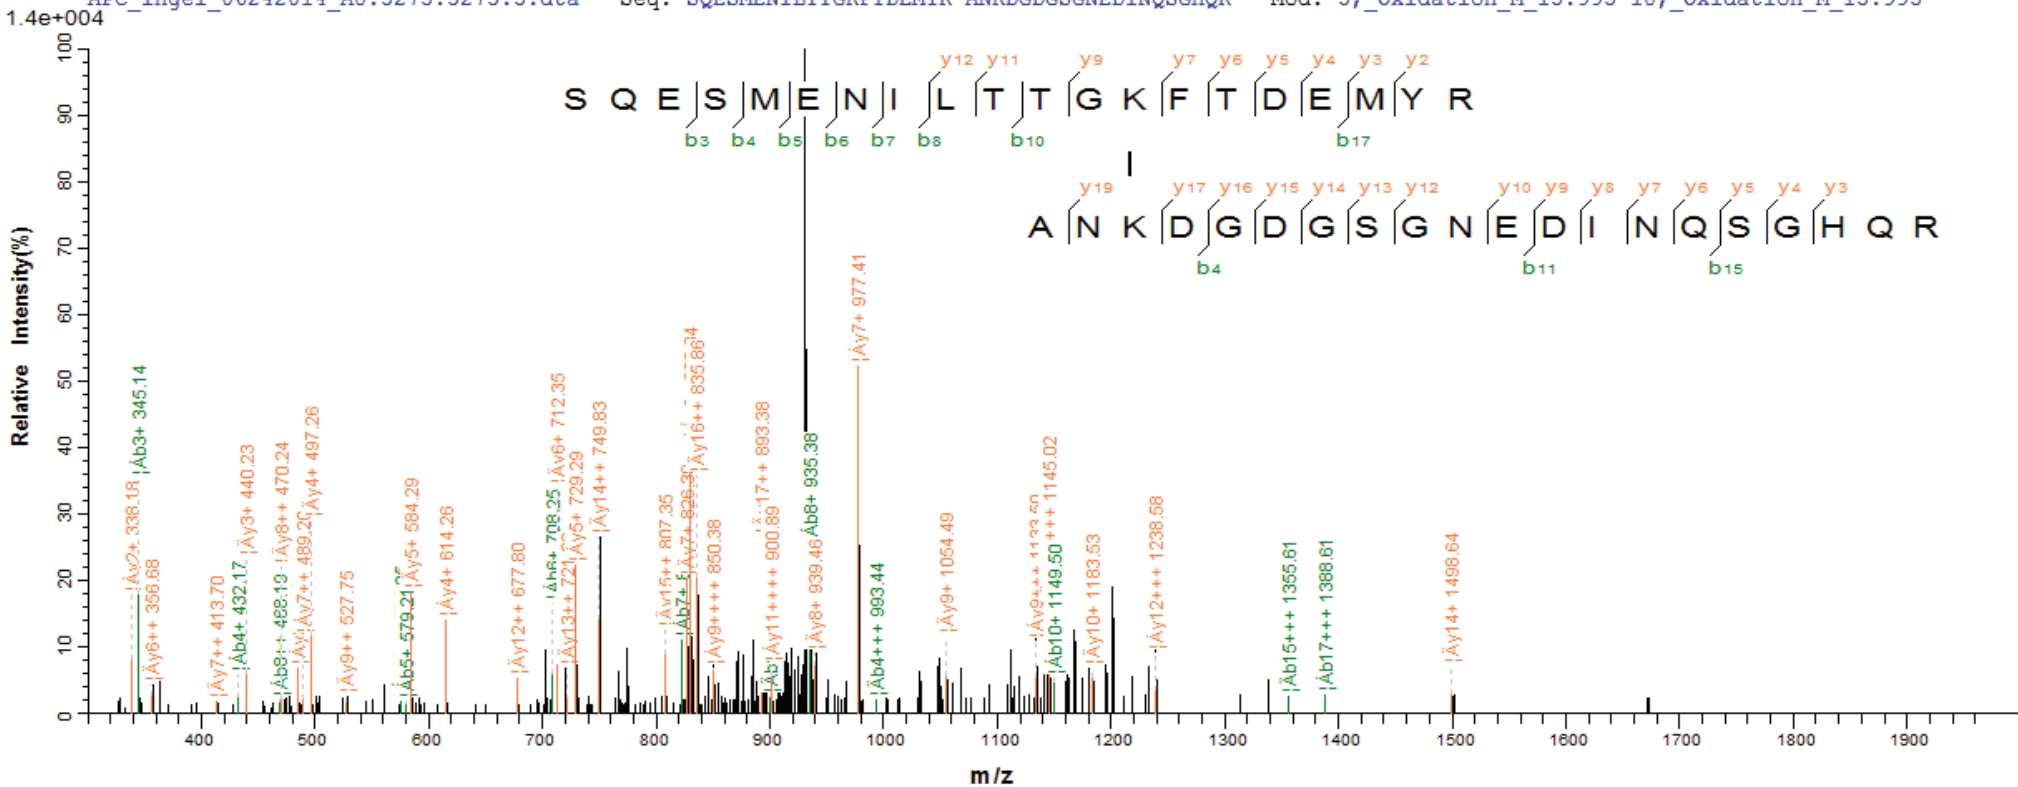



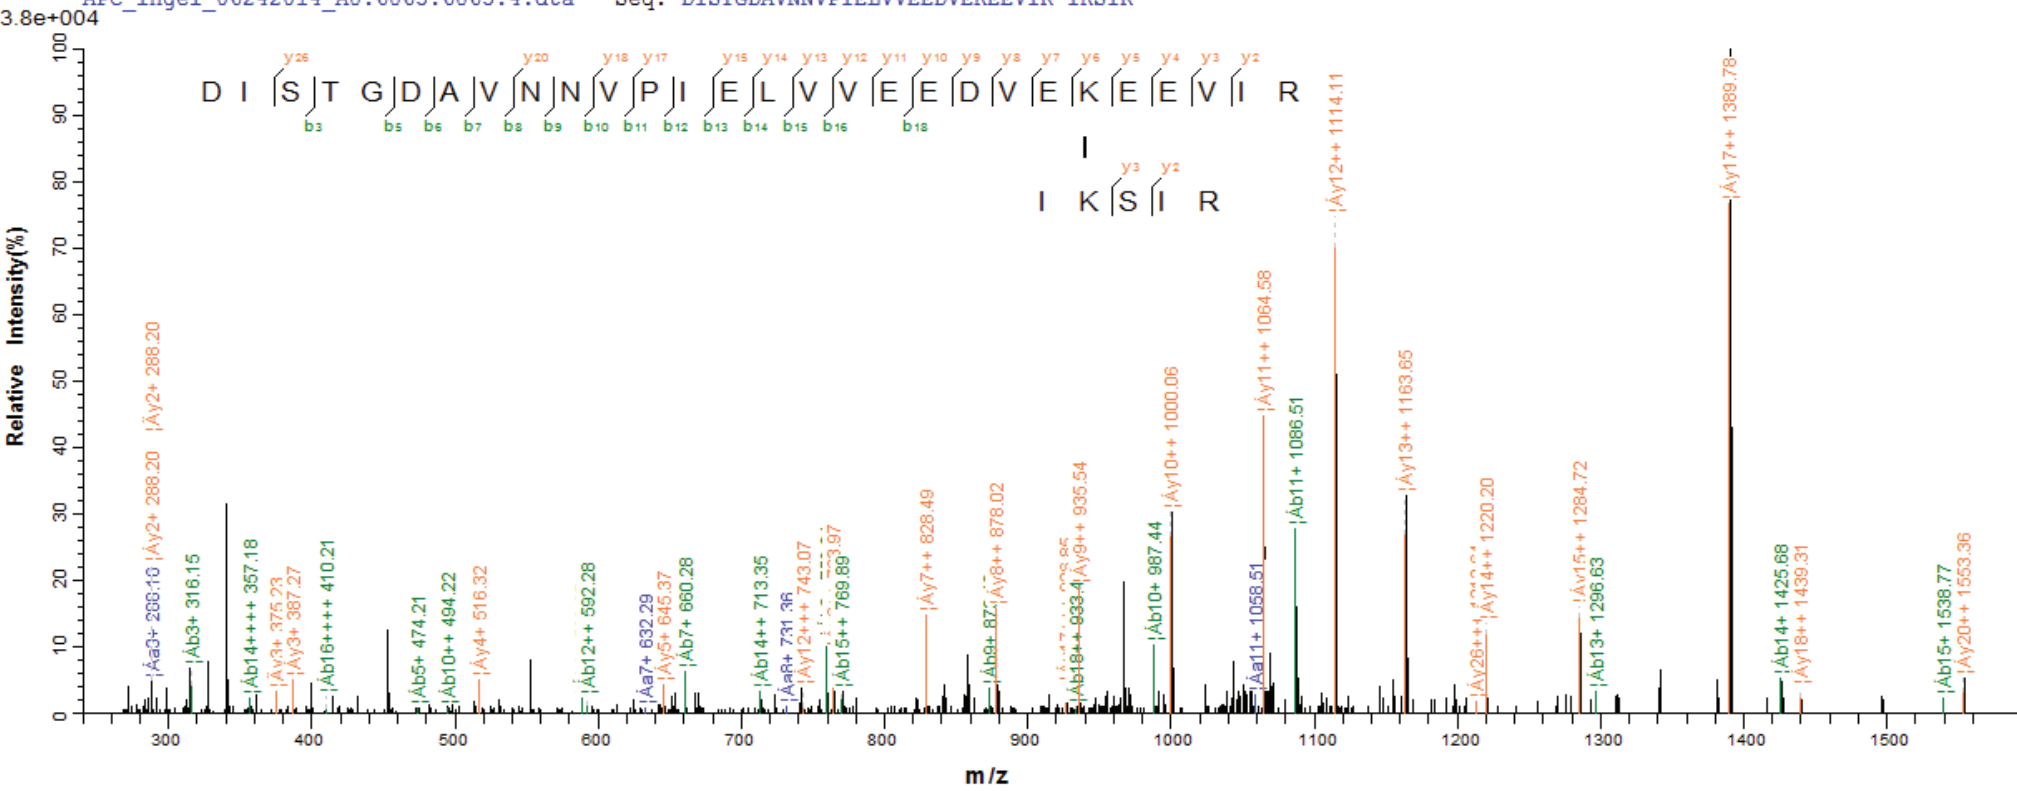

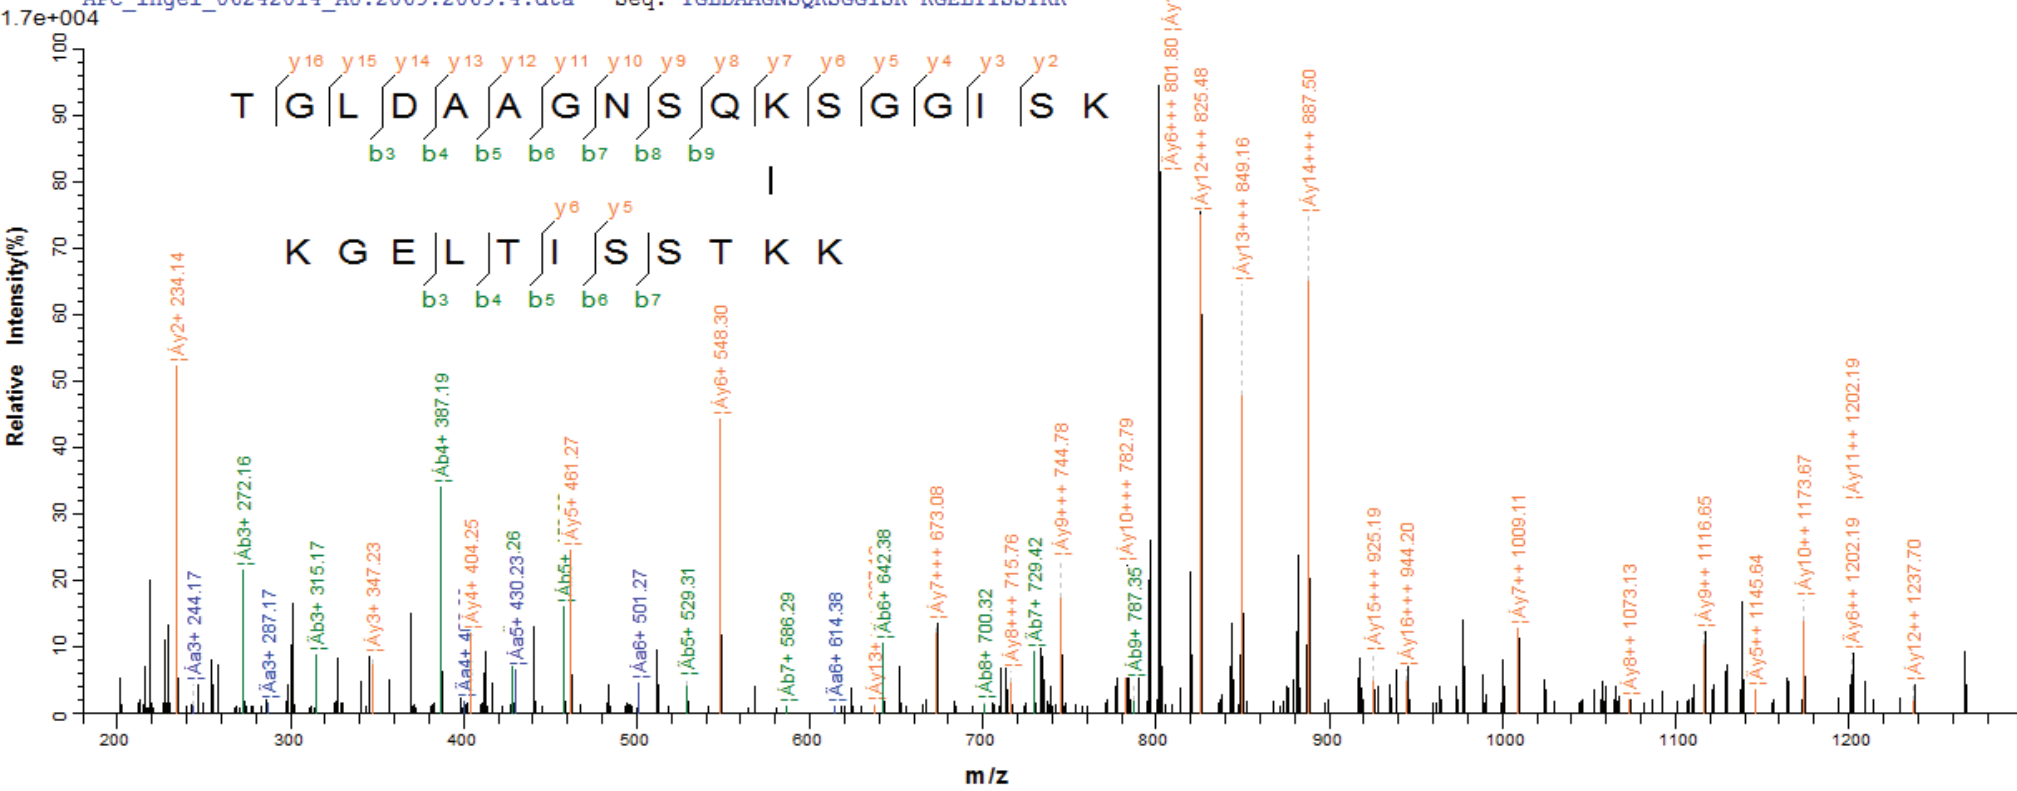

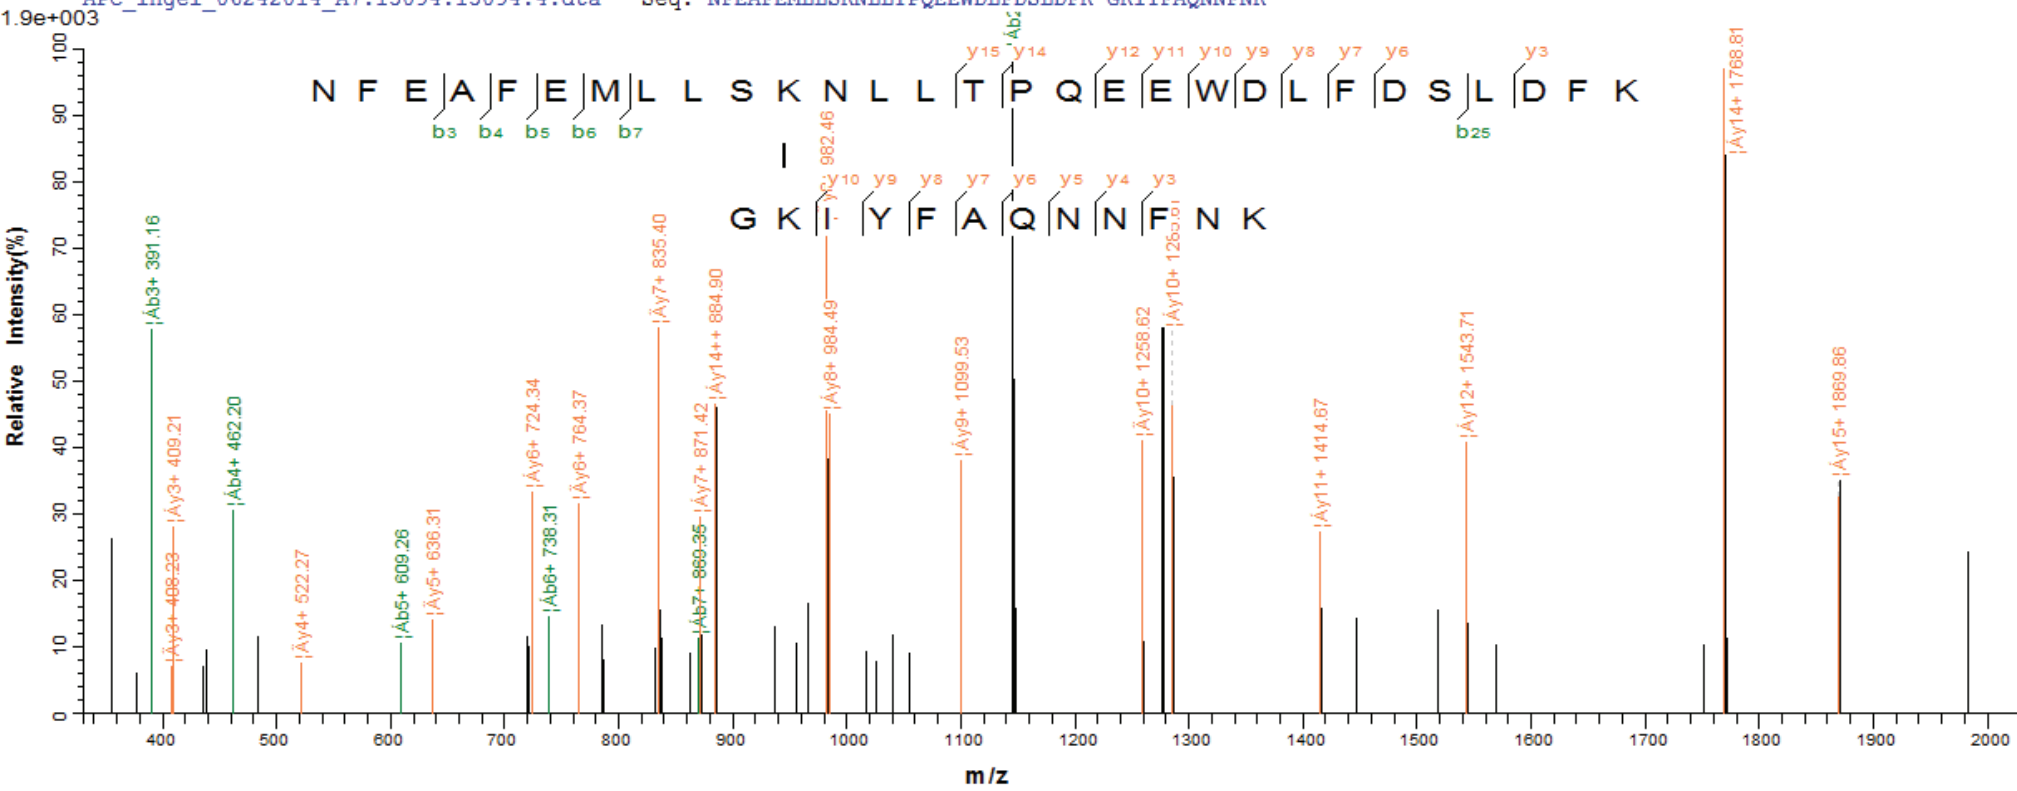

APC\_ingel\_06242014\_A7.8183.8183.4.dta Seq: ALLSLVDTLHDSINQDTNITKR-ELNKDLPIR

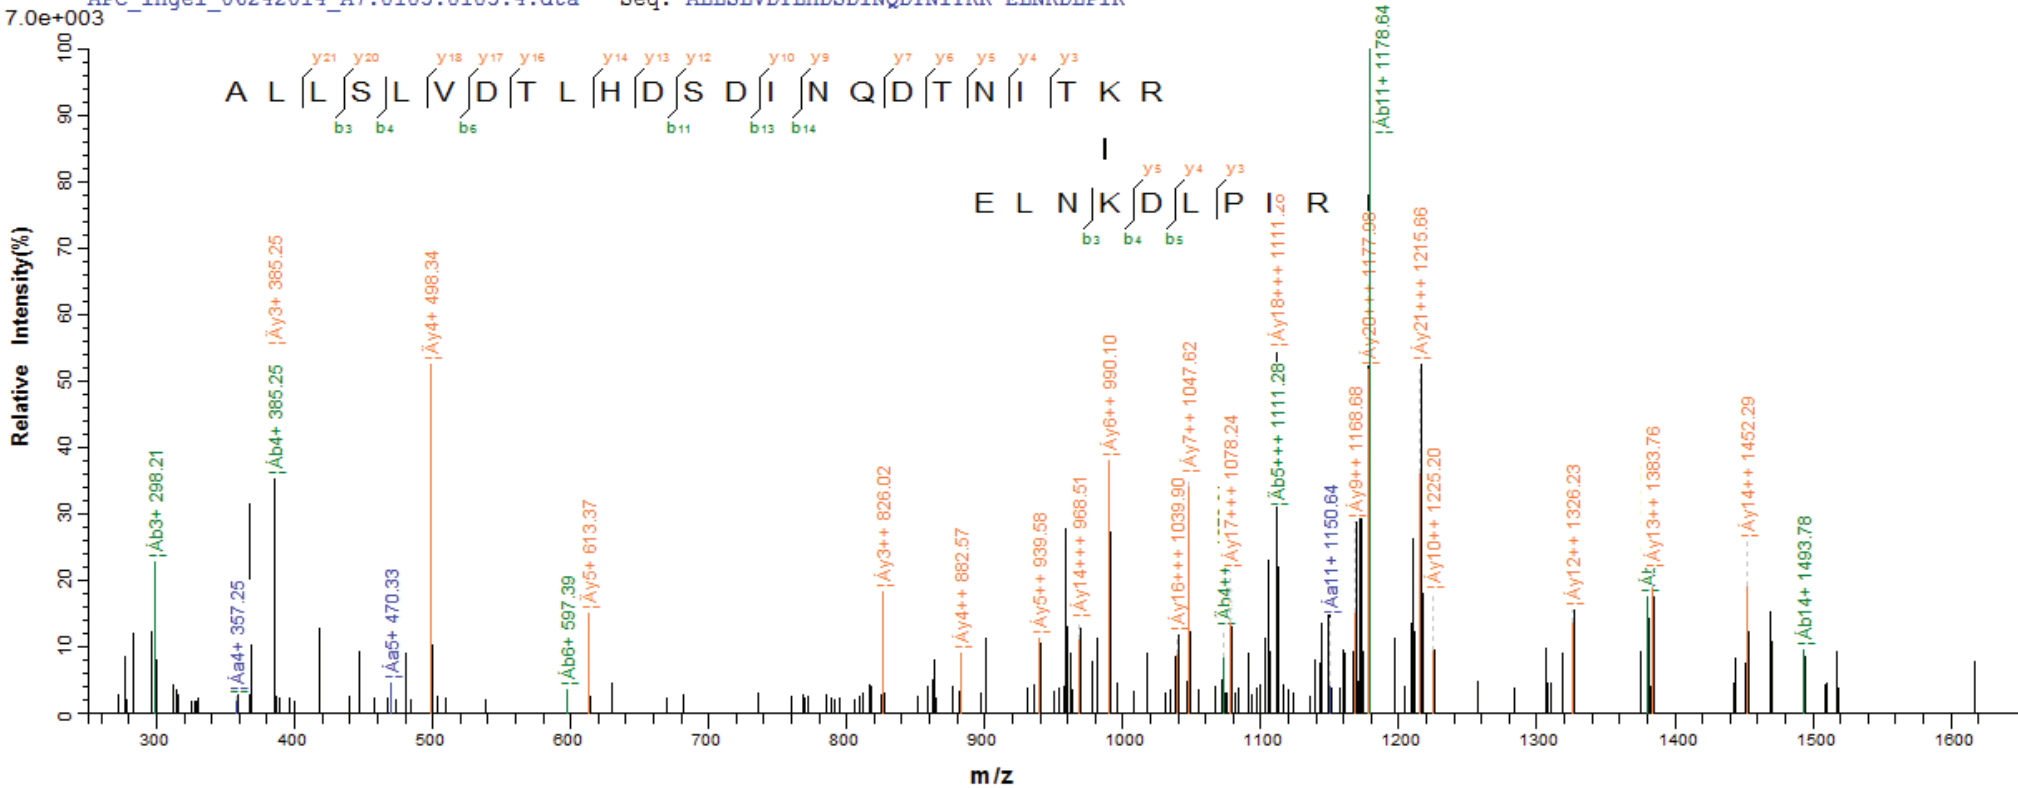

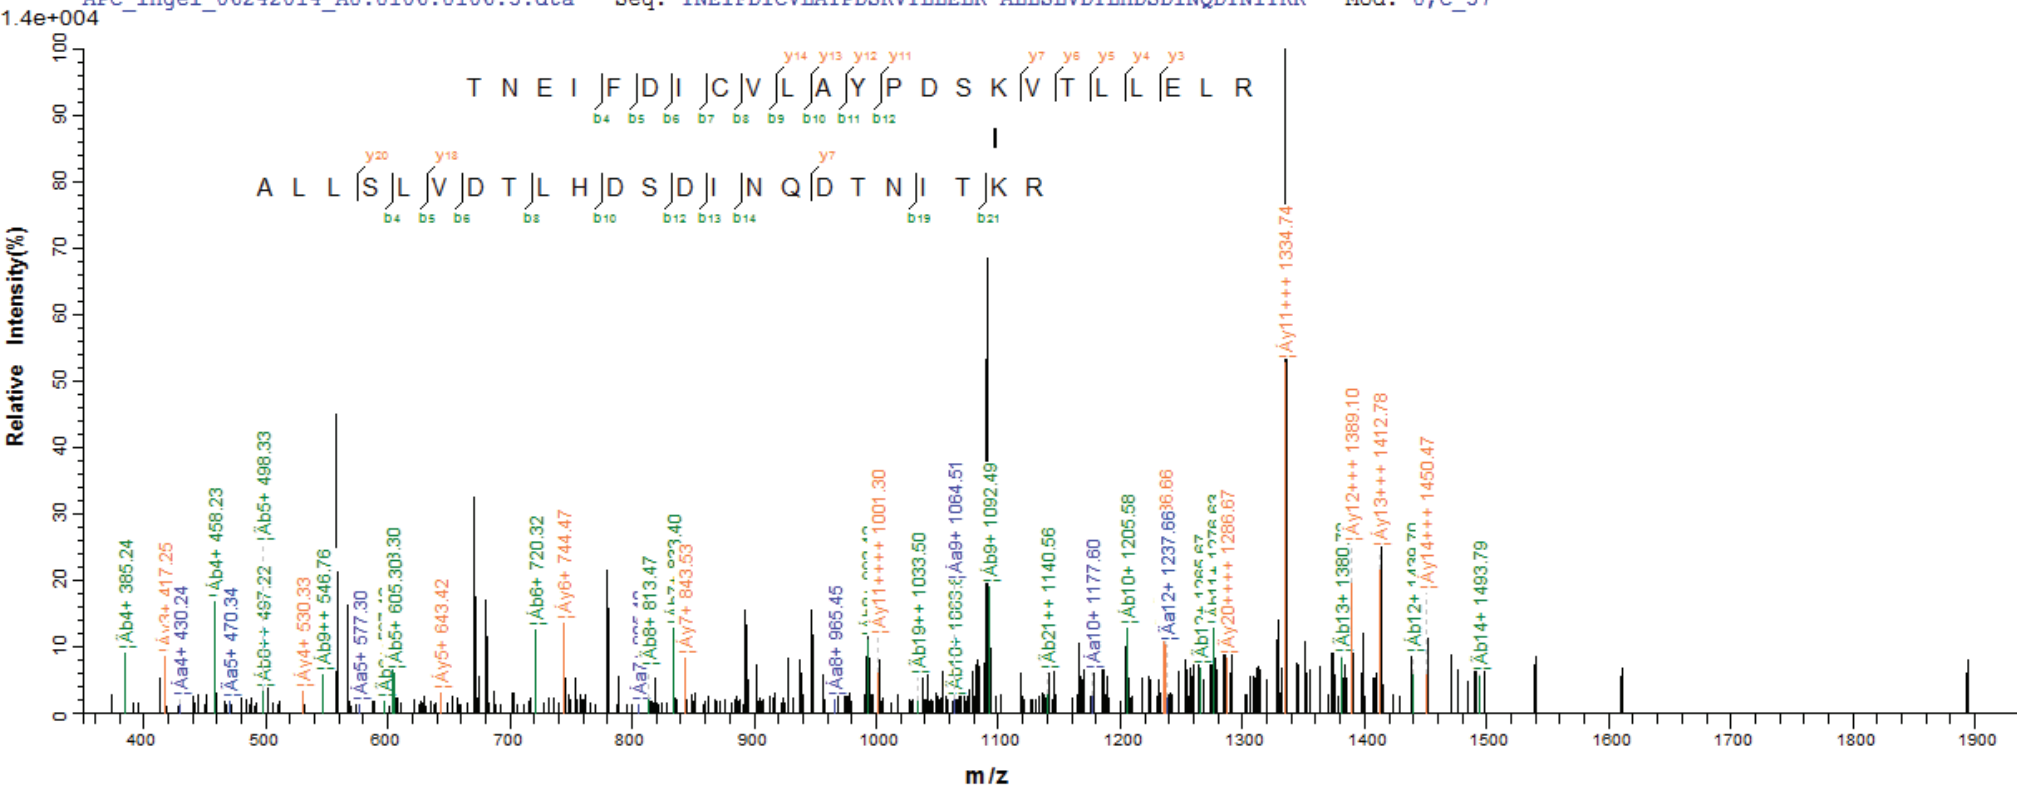



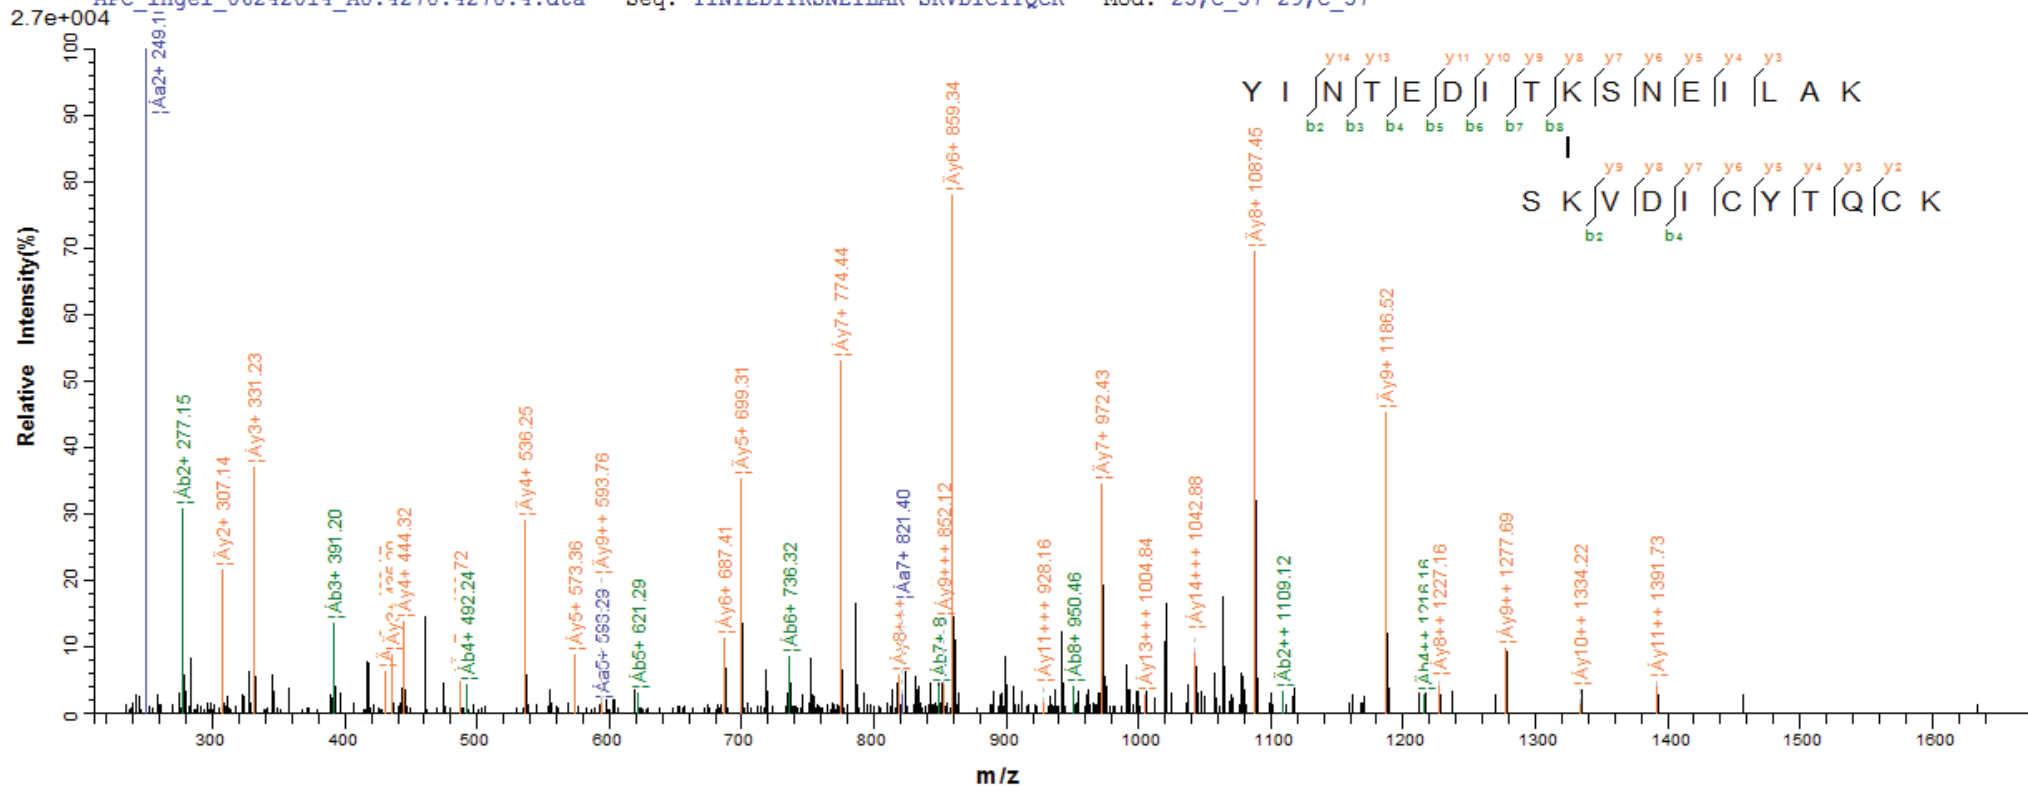

APC\_ingel\_06242014\_A8.2571.2571.6.dta Seq: ANLKMVSNEHESQSNISILK-ANKDGDGSGNEDINQSGHQK Mod: 5,\_Oxidation\_M\_15.995

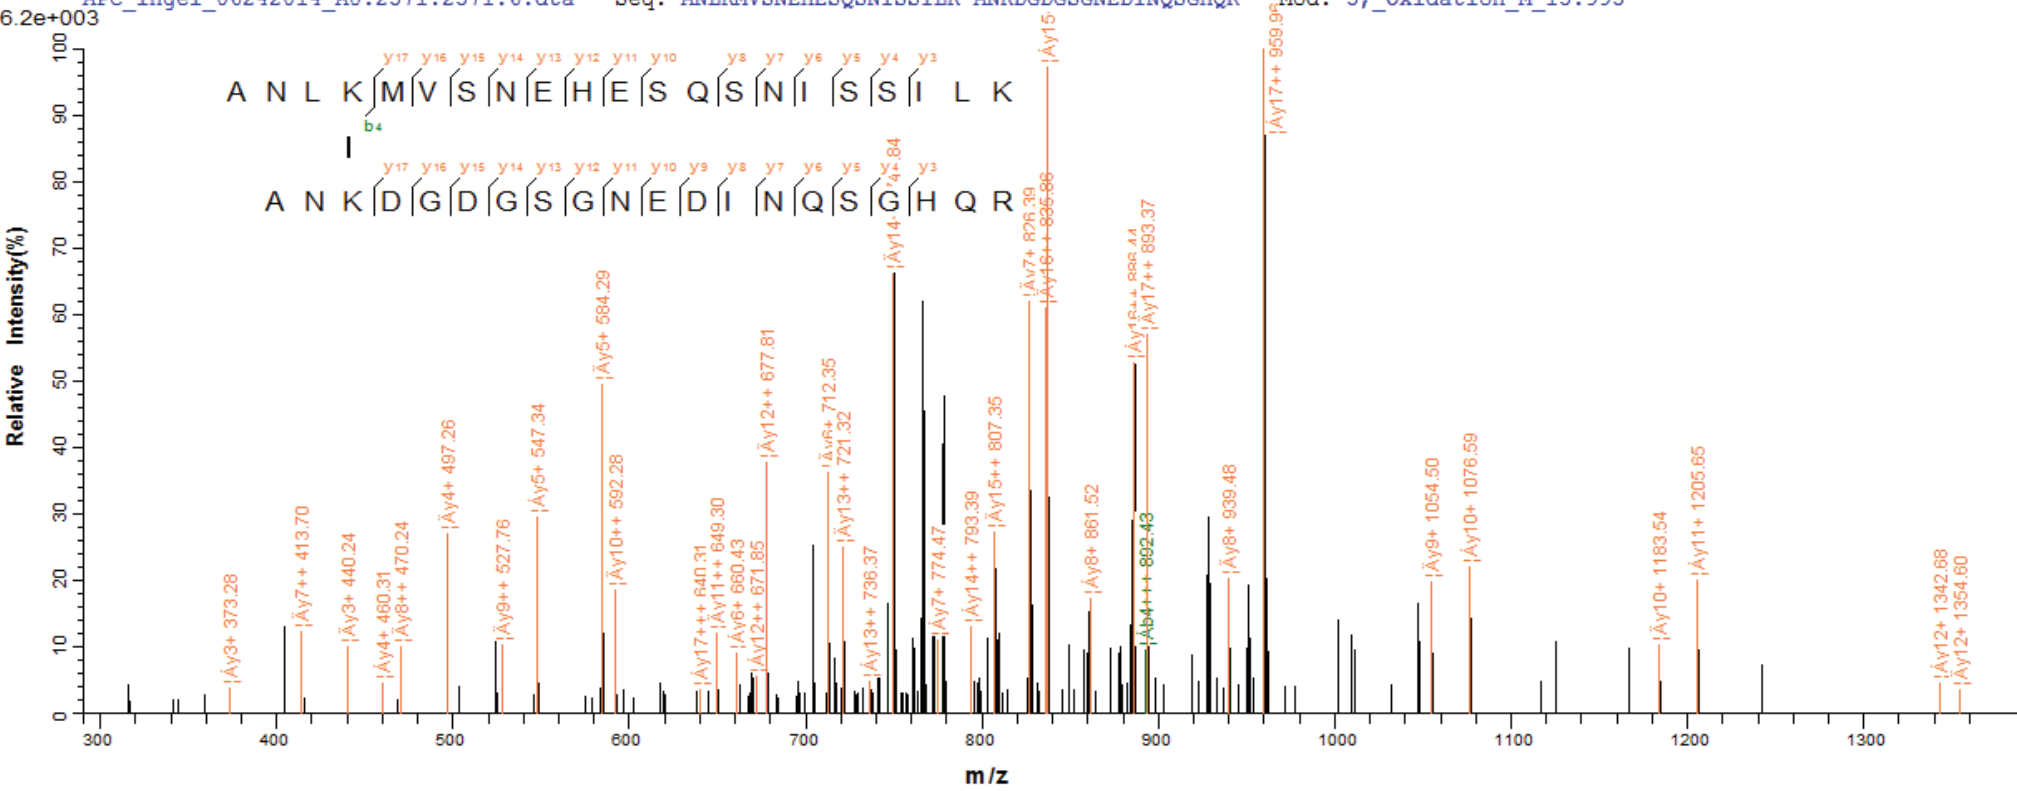



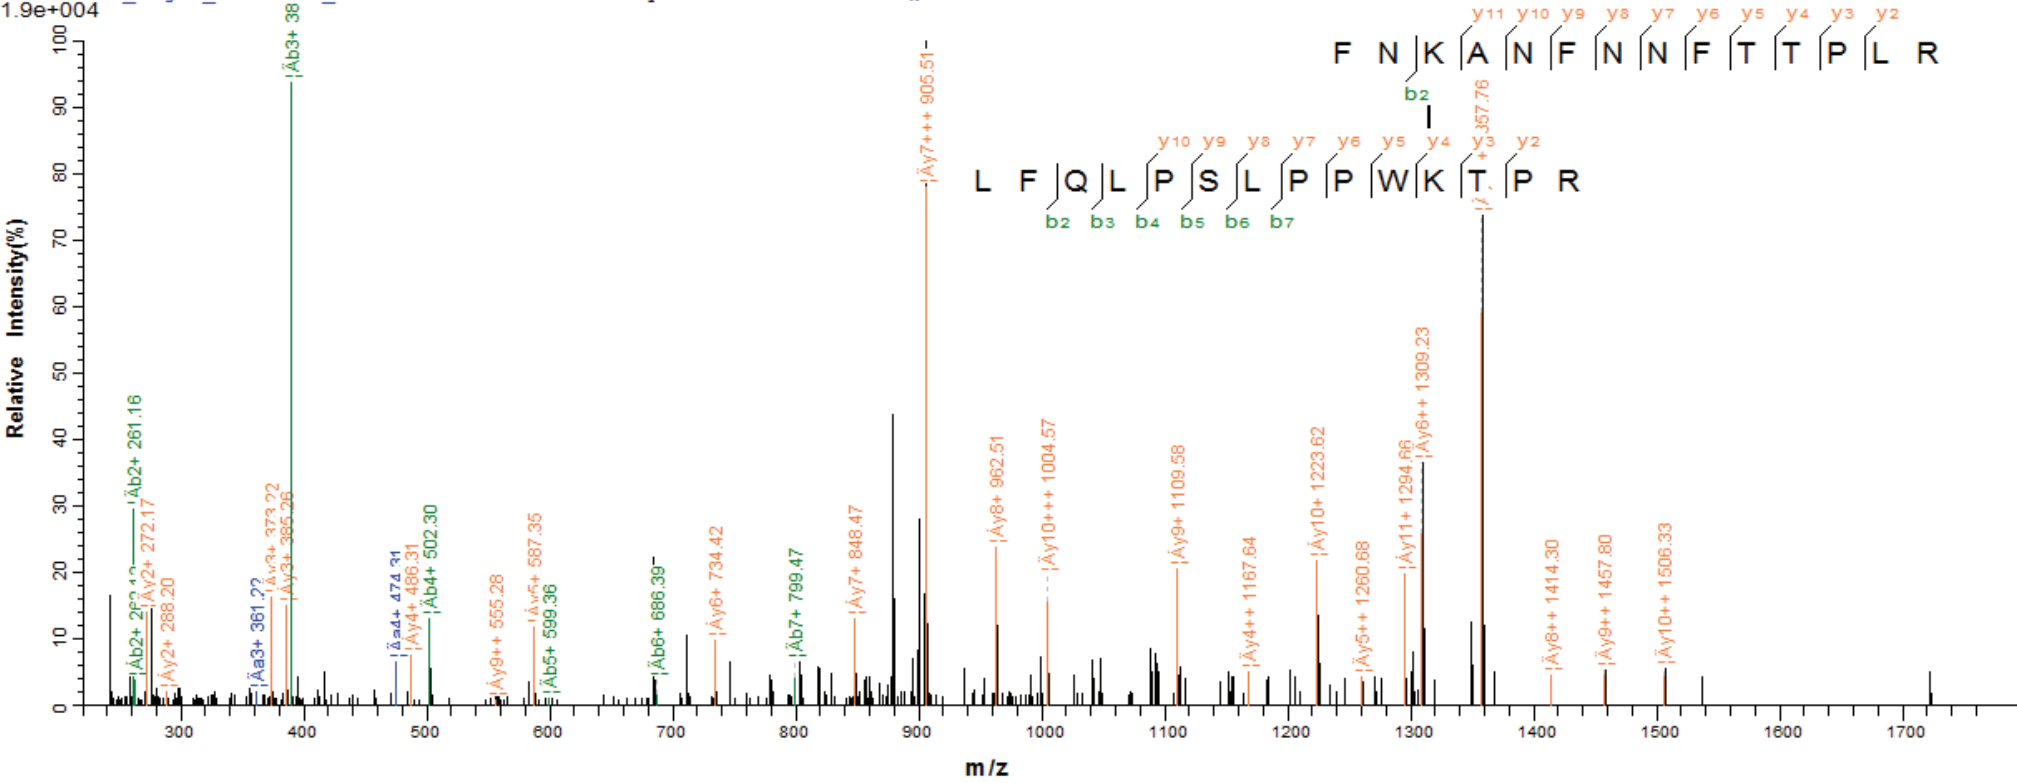

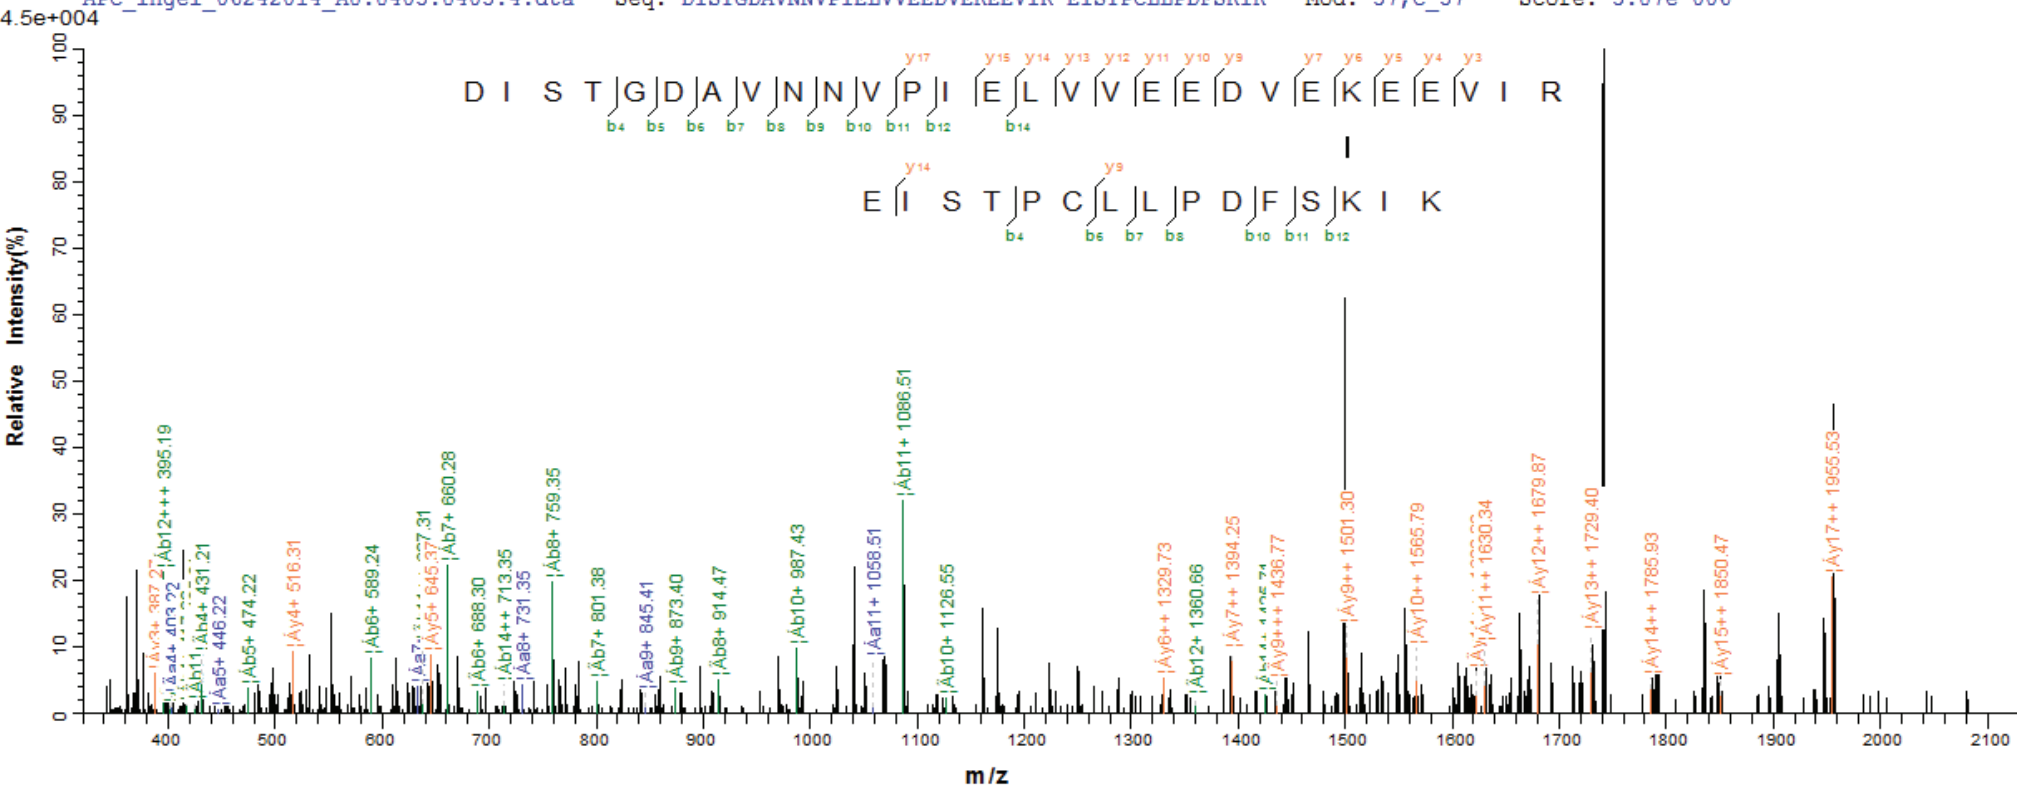



APC\_ingel\_06242014\_A8.5743.5743.4.dta Seq: QYLLKSELELDYDQK-ALEEDDFLKVK Score: 9.95e-002

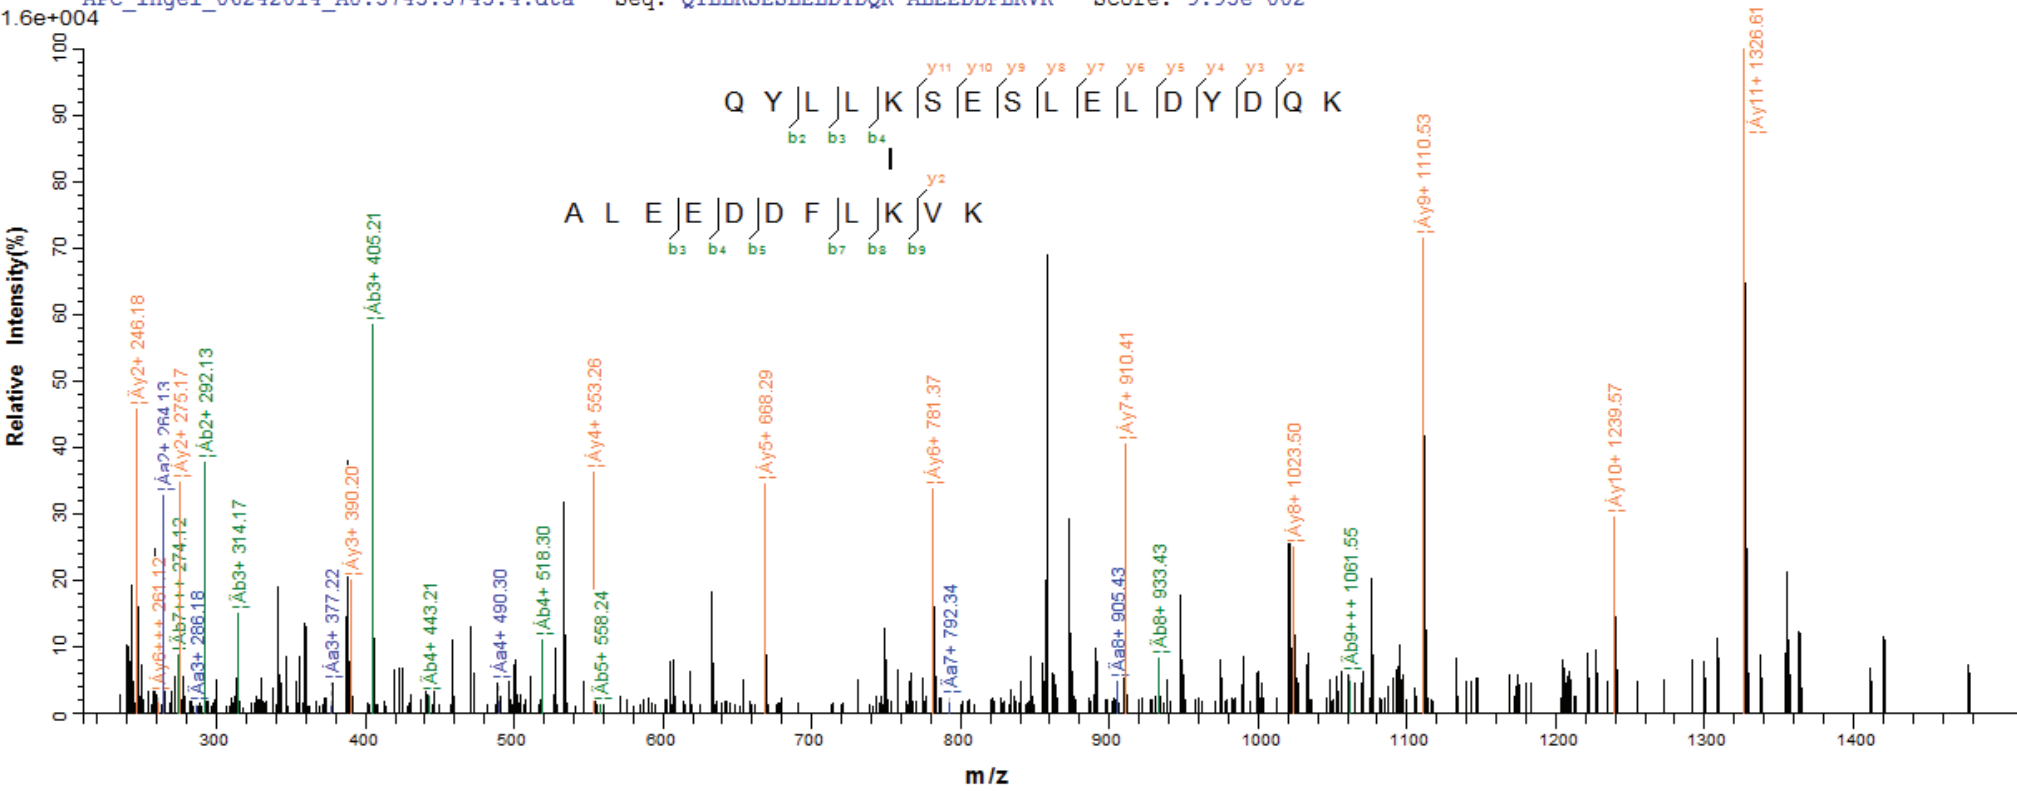

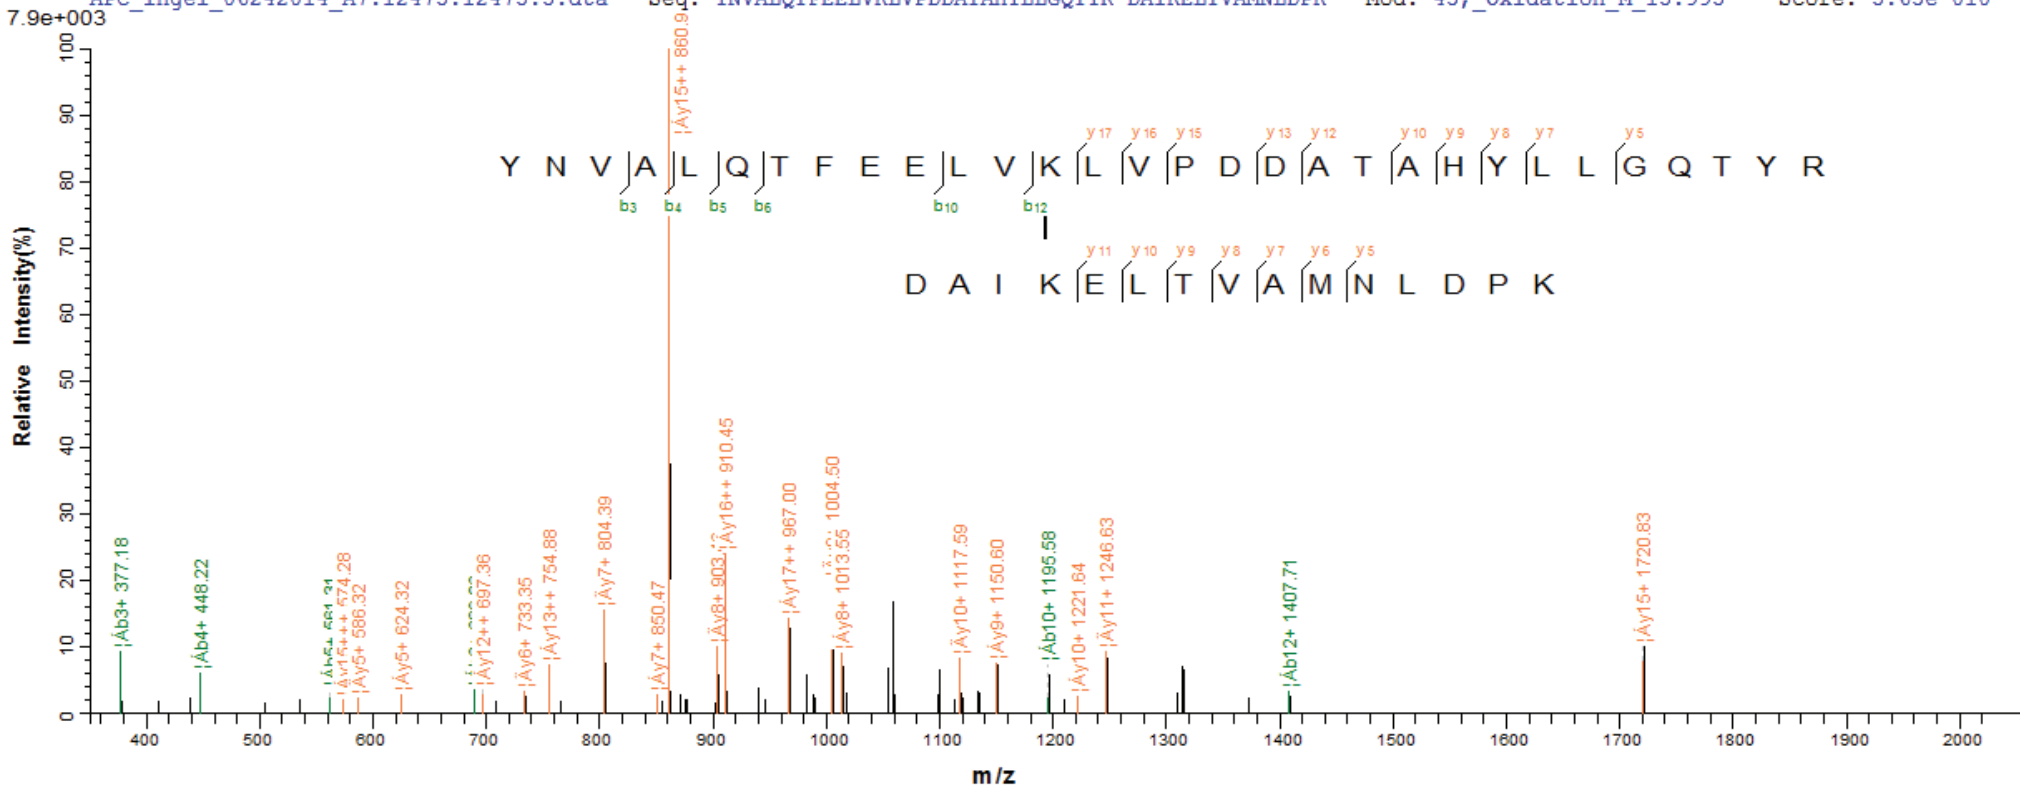

APC\_ingel\_06242014\_A7.7289.7289.5.dta Seq: YINTEDITSNEILAK-EFGEDKEIMKNLYK Score: 5.91e-002

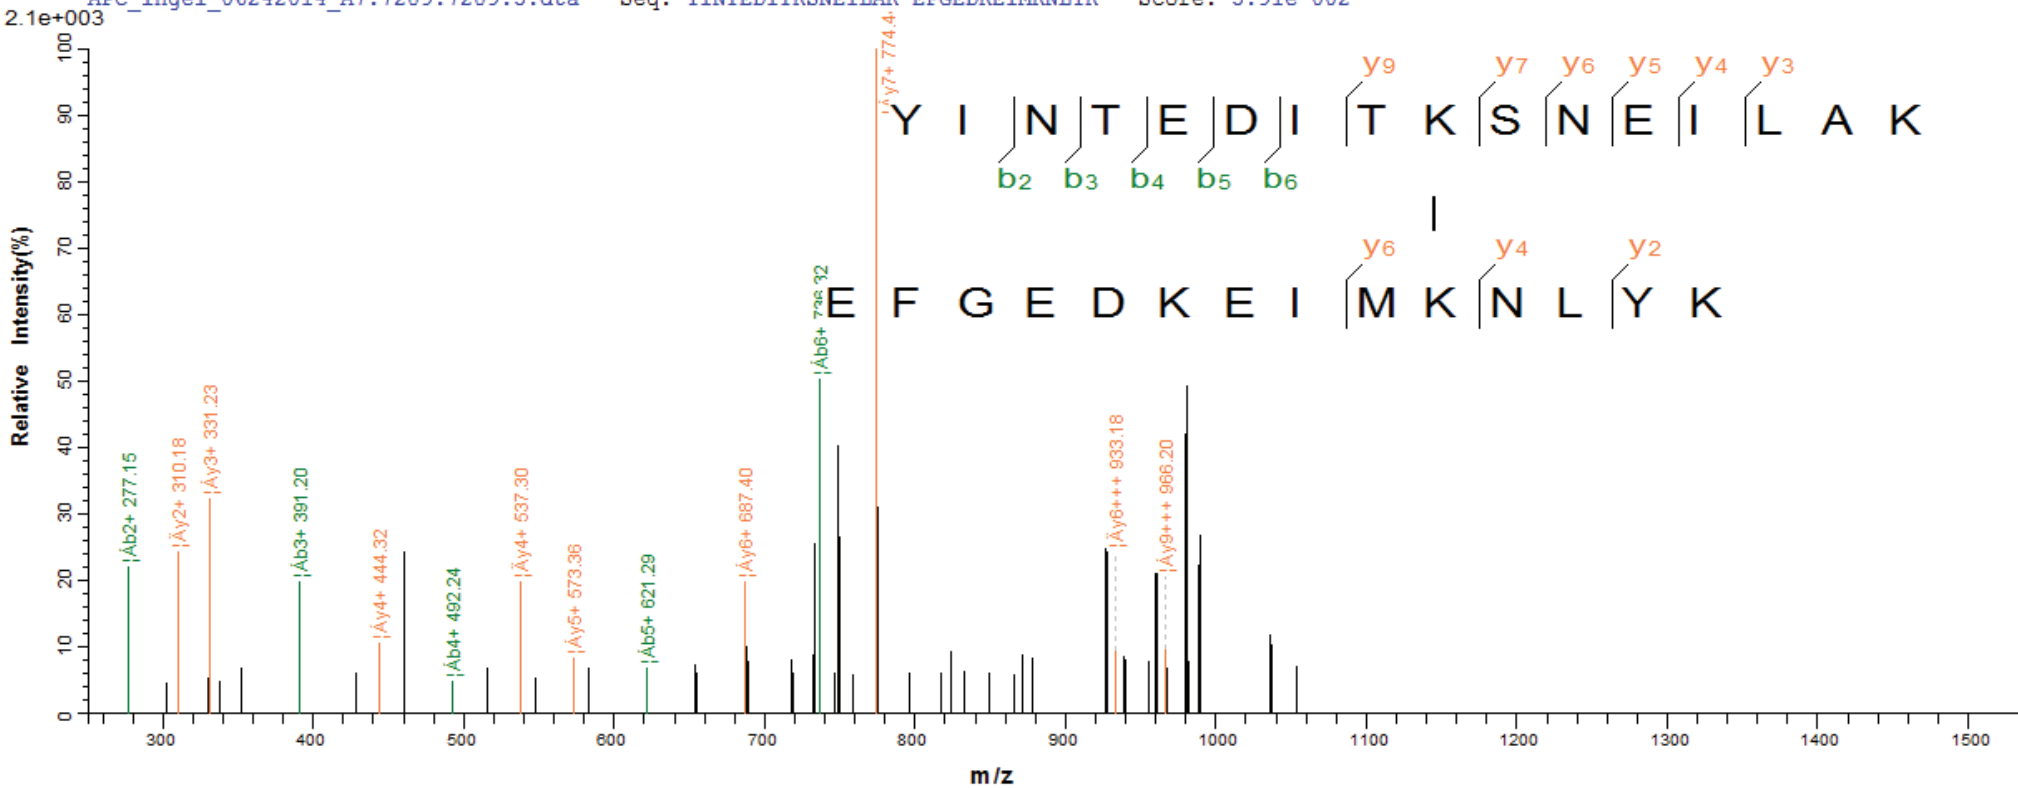

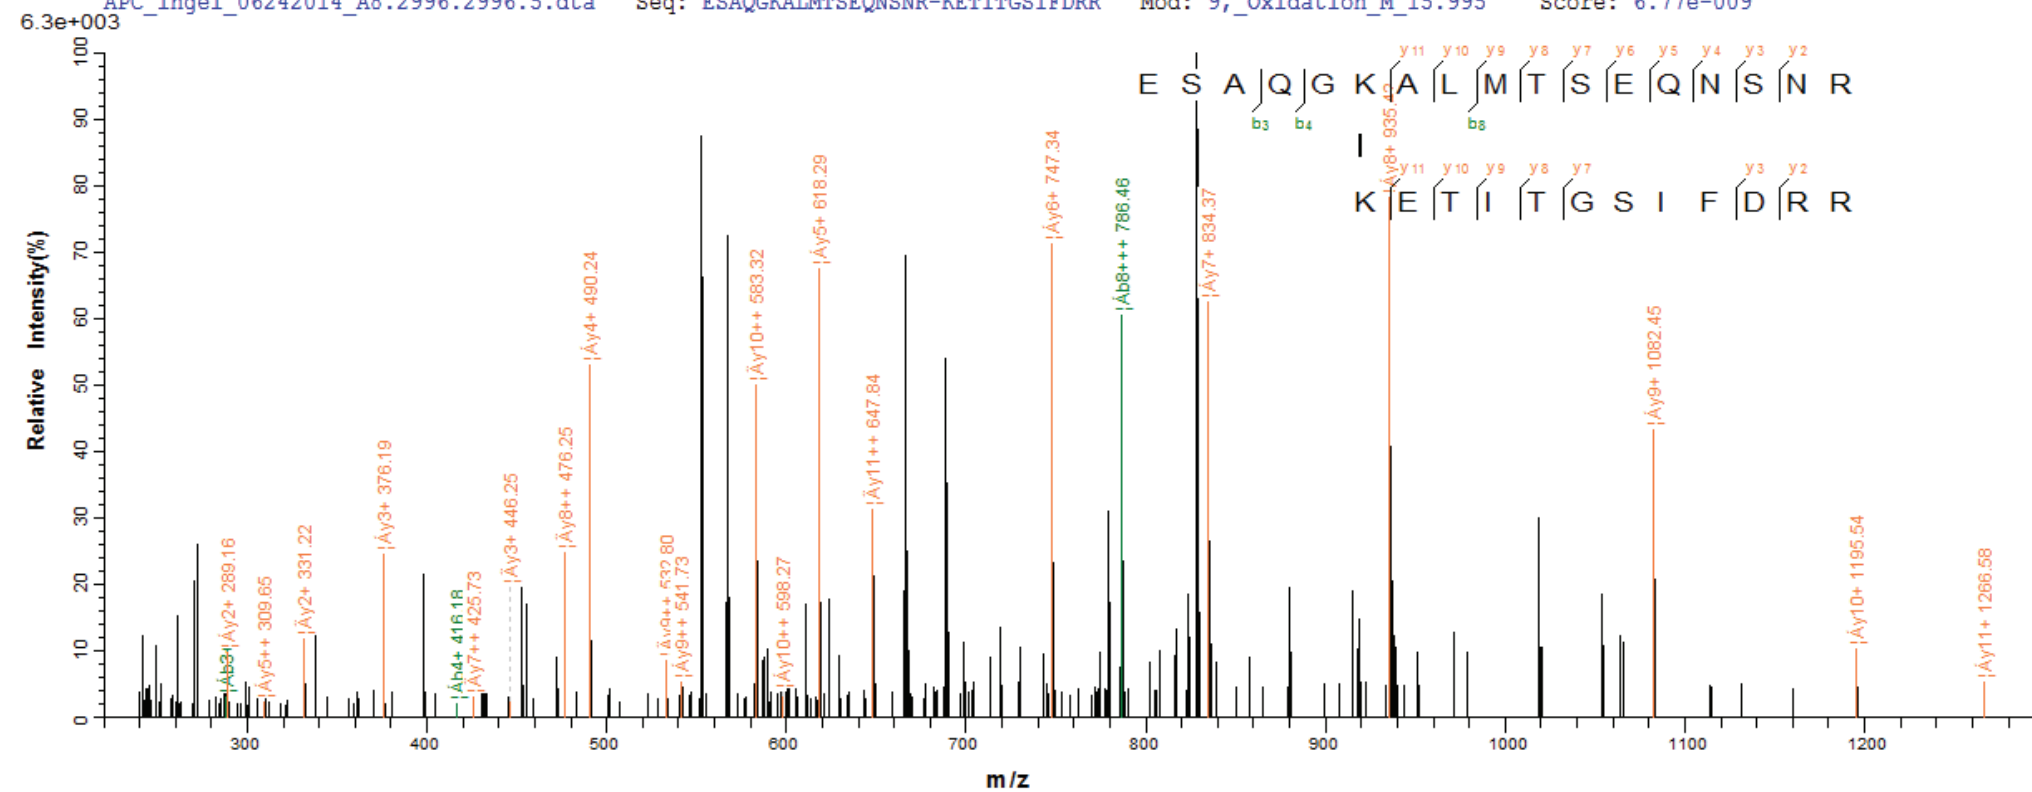

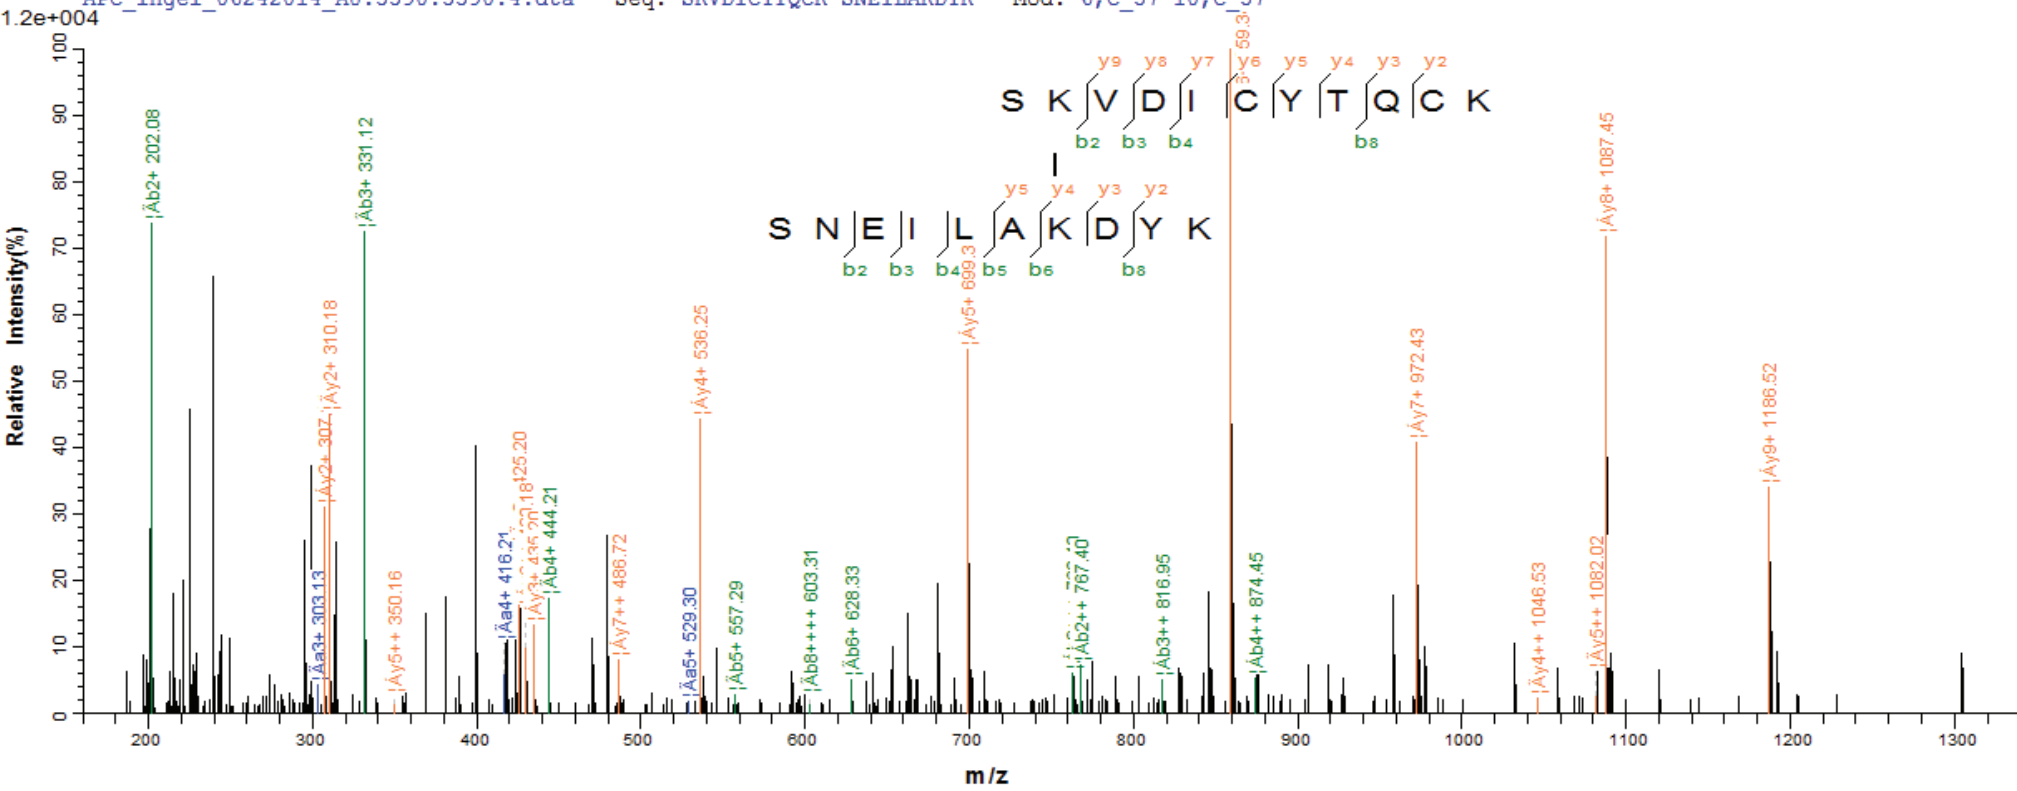



APC\_ingel\_06242014\_A8.5680.5680.5.dta

Seq: KLYIGTLKDENLGIISK-ESSVKIPALFK

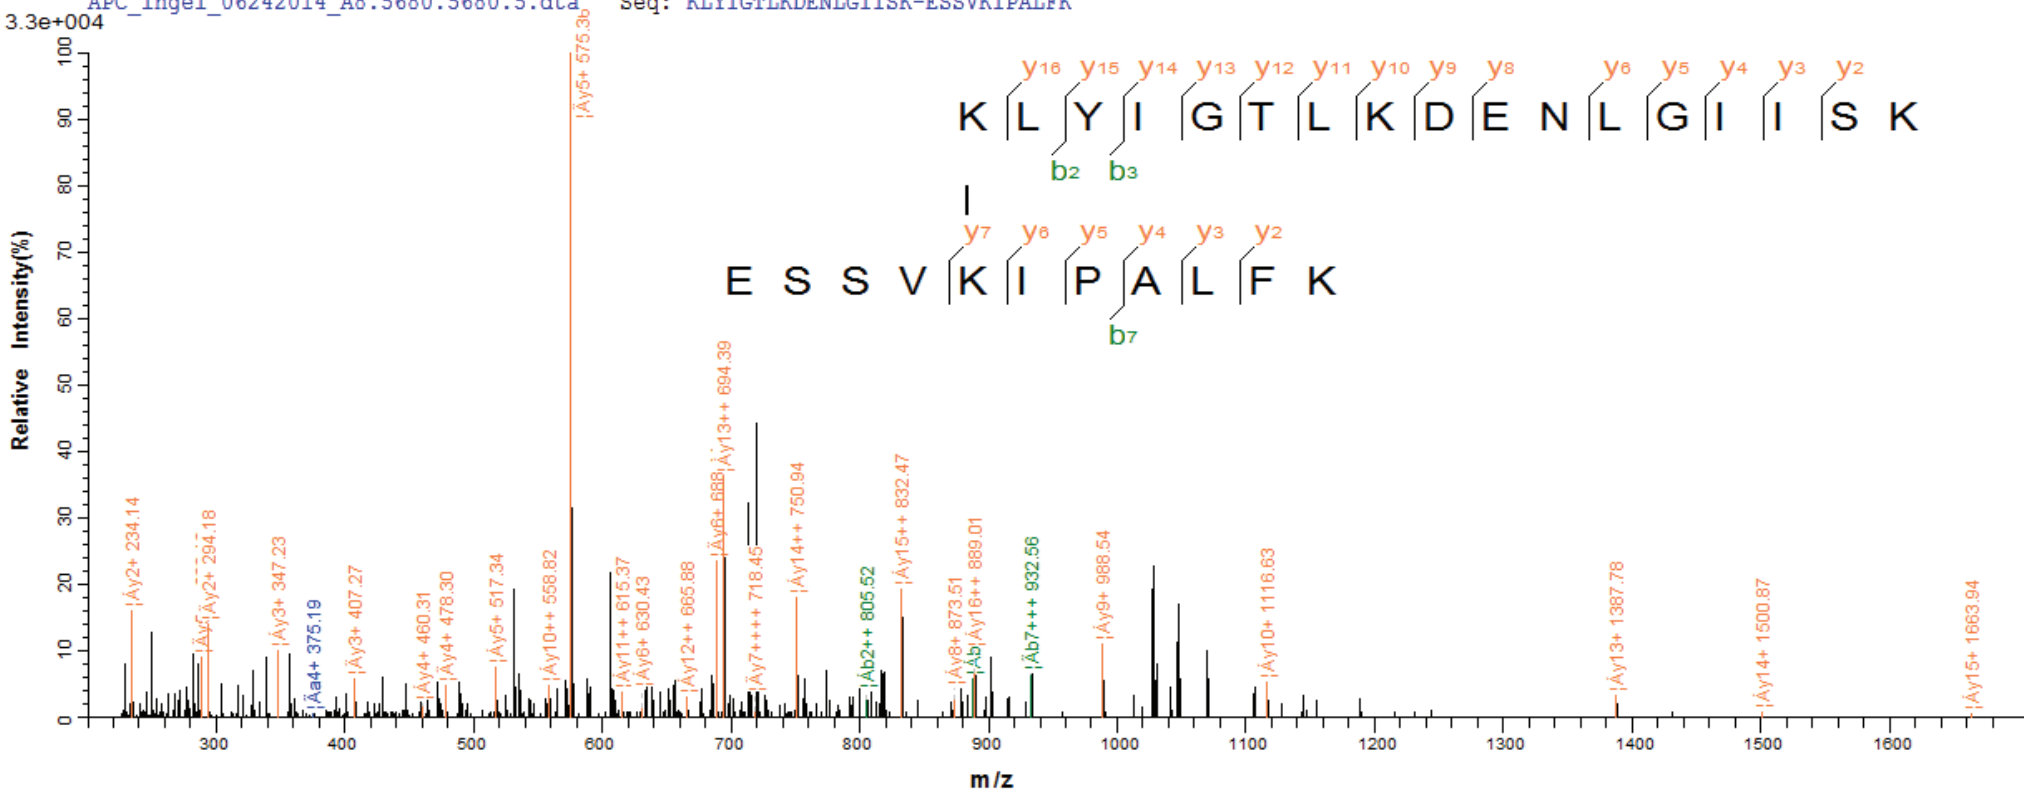

APC\_ingel\_06242014\_A7.10865.10865.4.dta

Seq: FMMKCVDEELLEGIIVTDETVK-SIKASQTVDQNTSIYYR

Mod: 5,C\_57

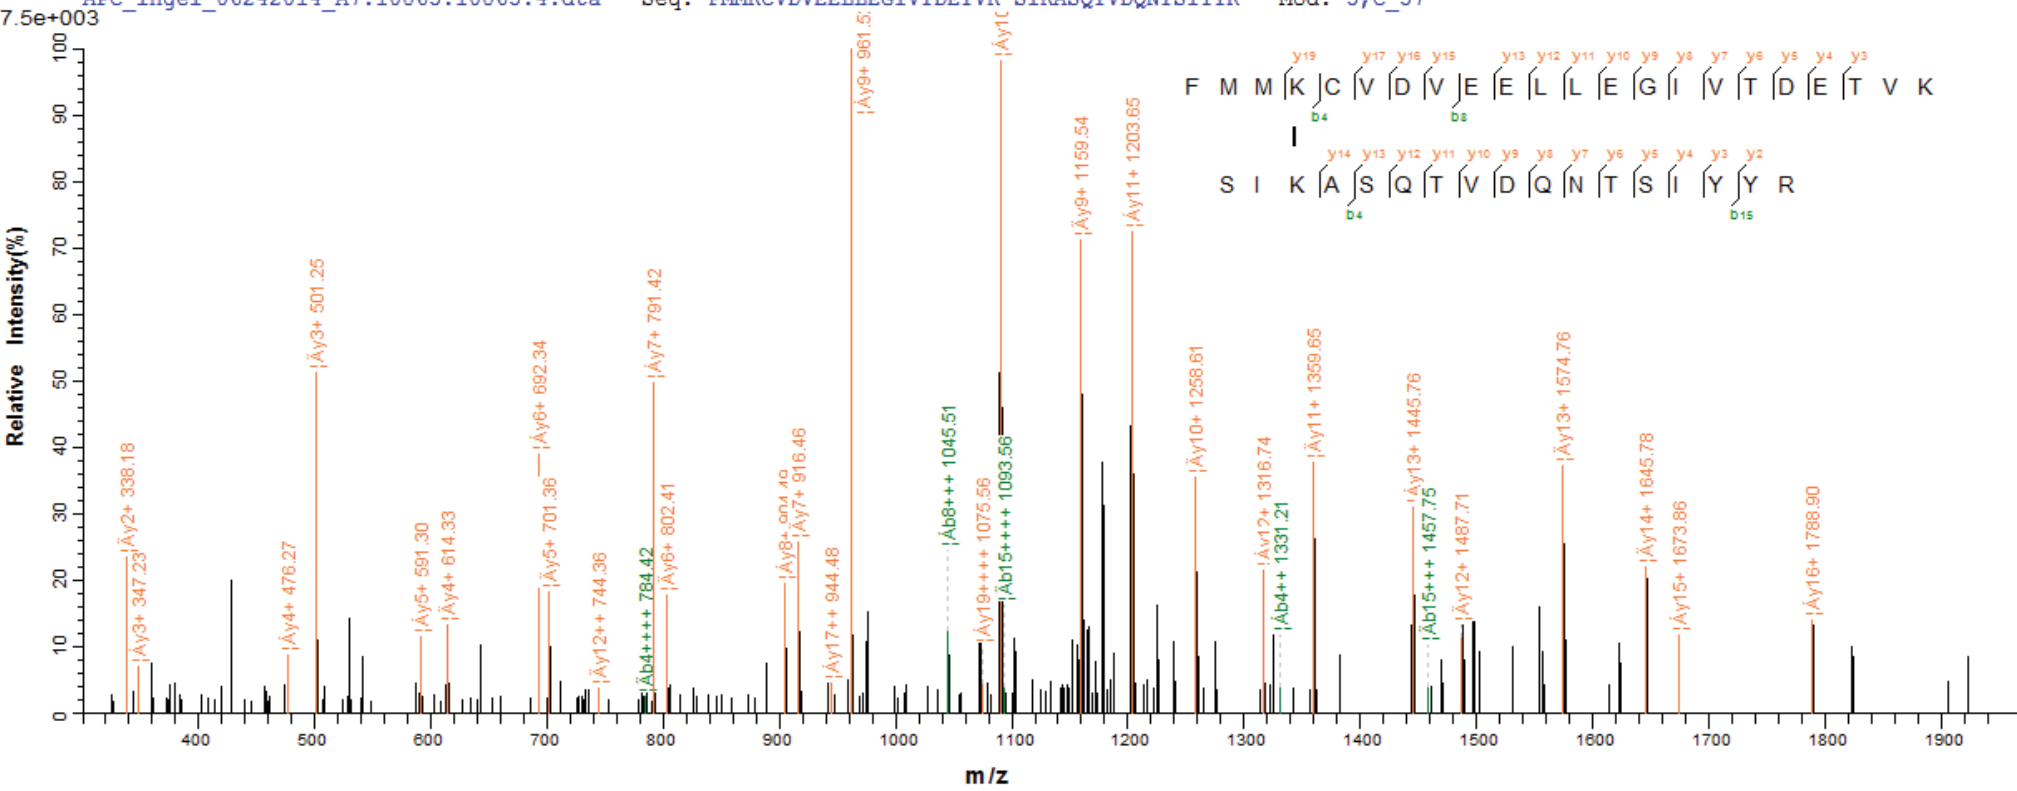

APC\_ingel\_06242014\_A8.4953.4953.5.dta Seq: TIFKDDGNYKTR-IELKGIDFK

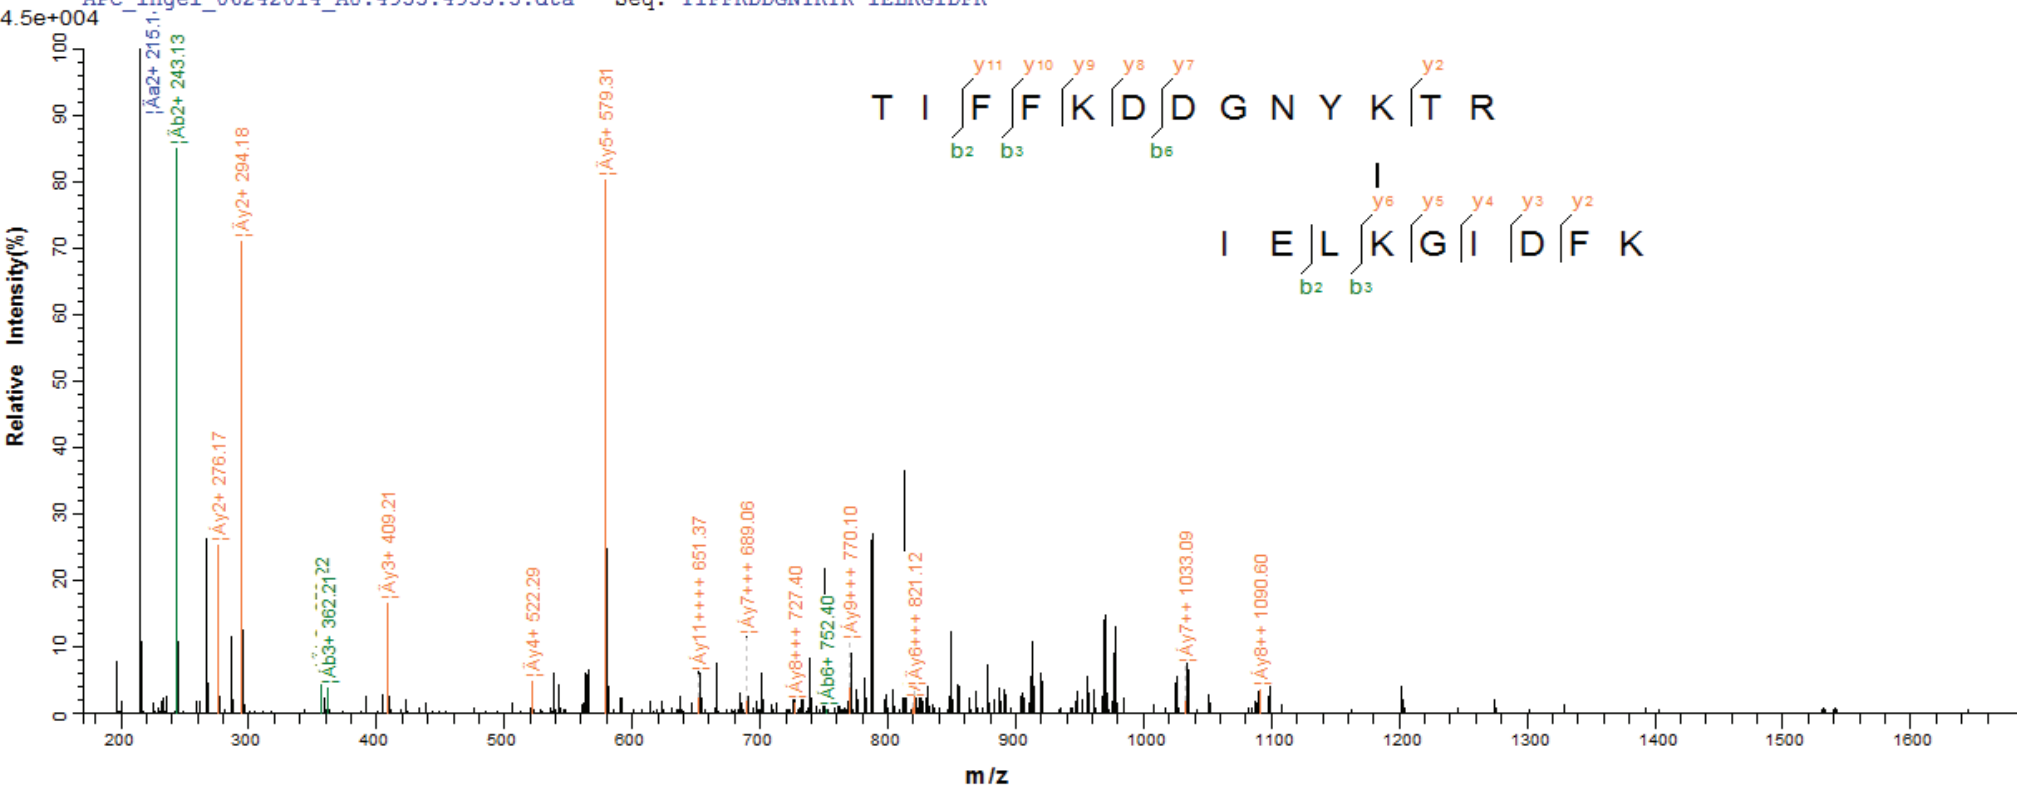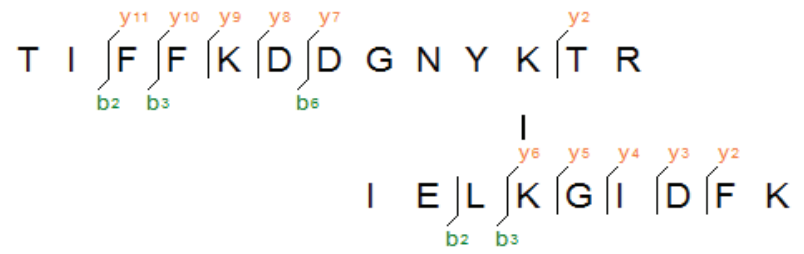

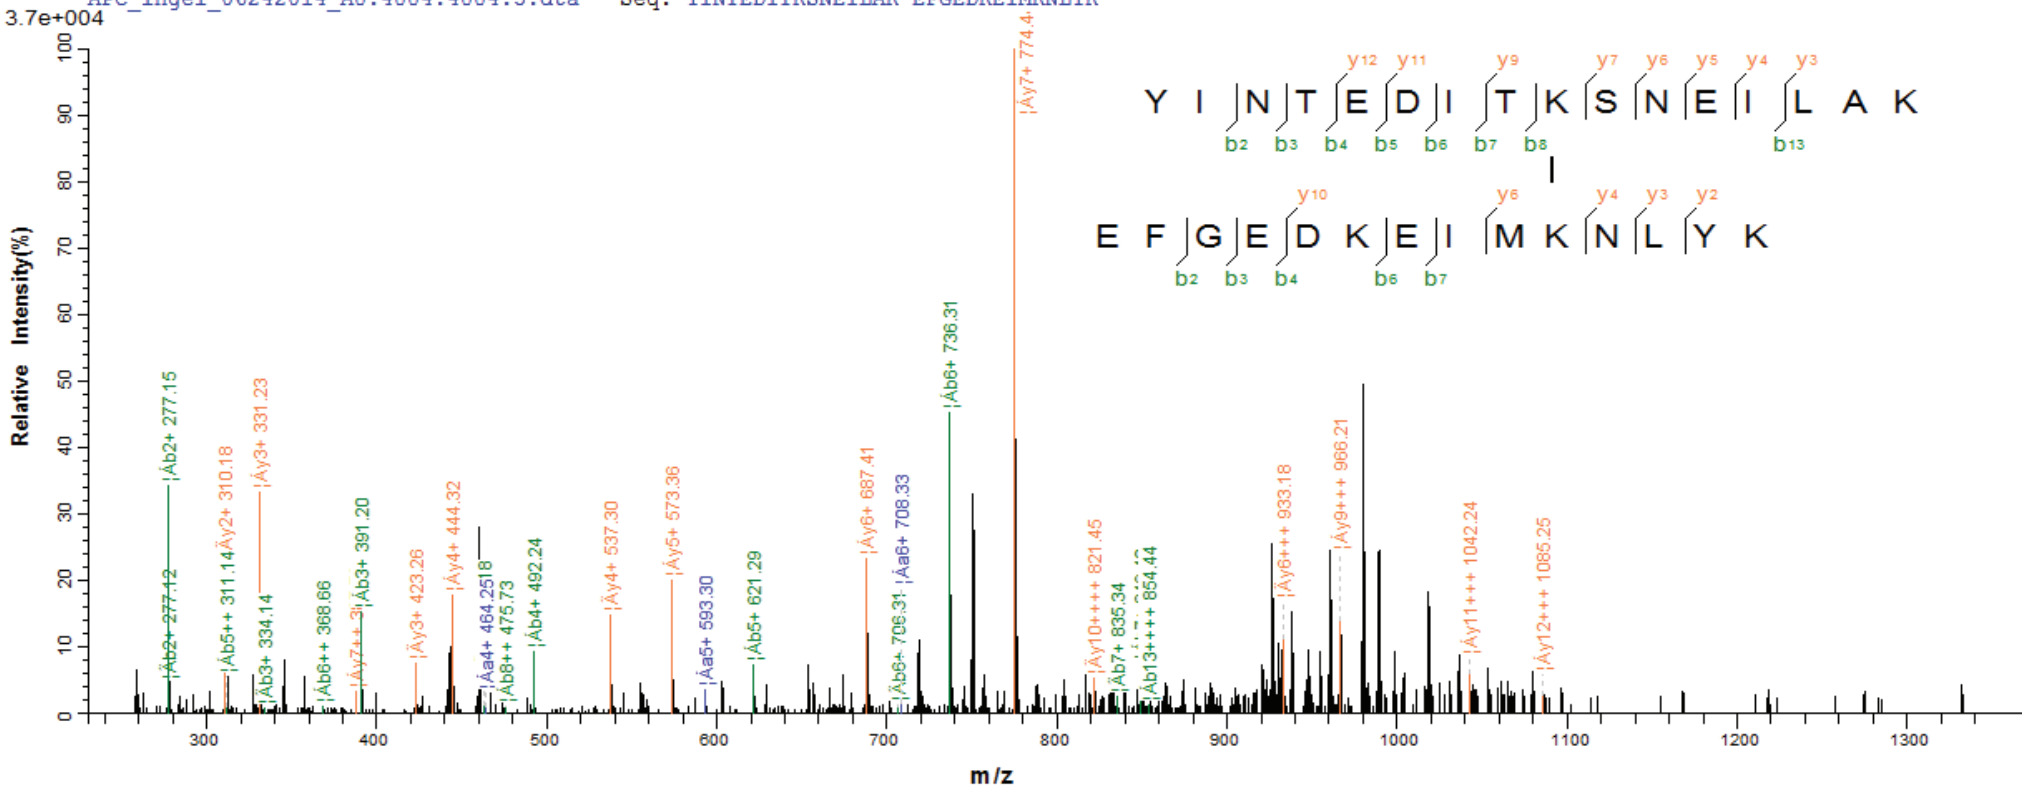

APC\_ingel\_06242014\_A8.5679.5679.5.dta Seq: SQESMENILTTGKFTDEMYR-QEHEKSIMYFR

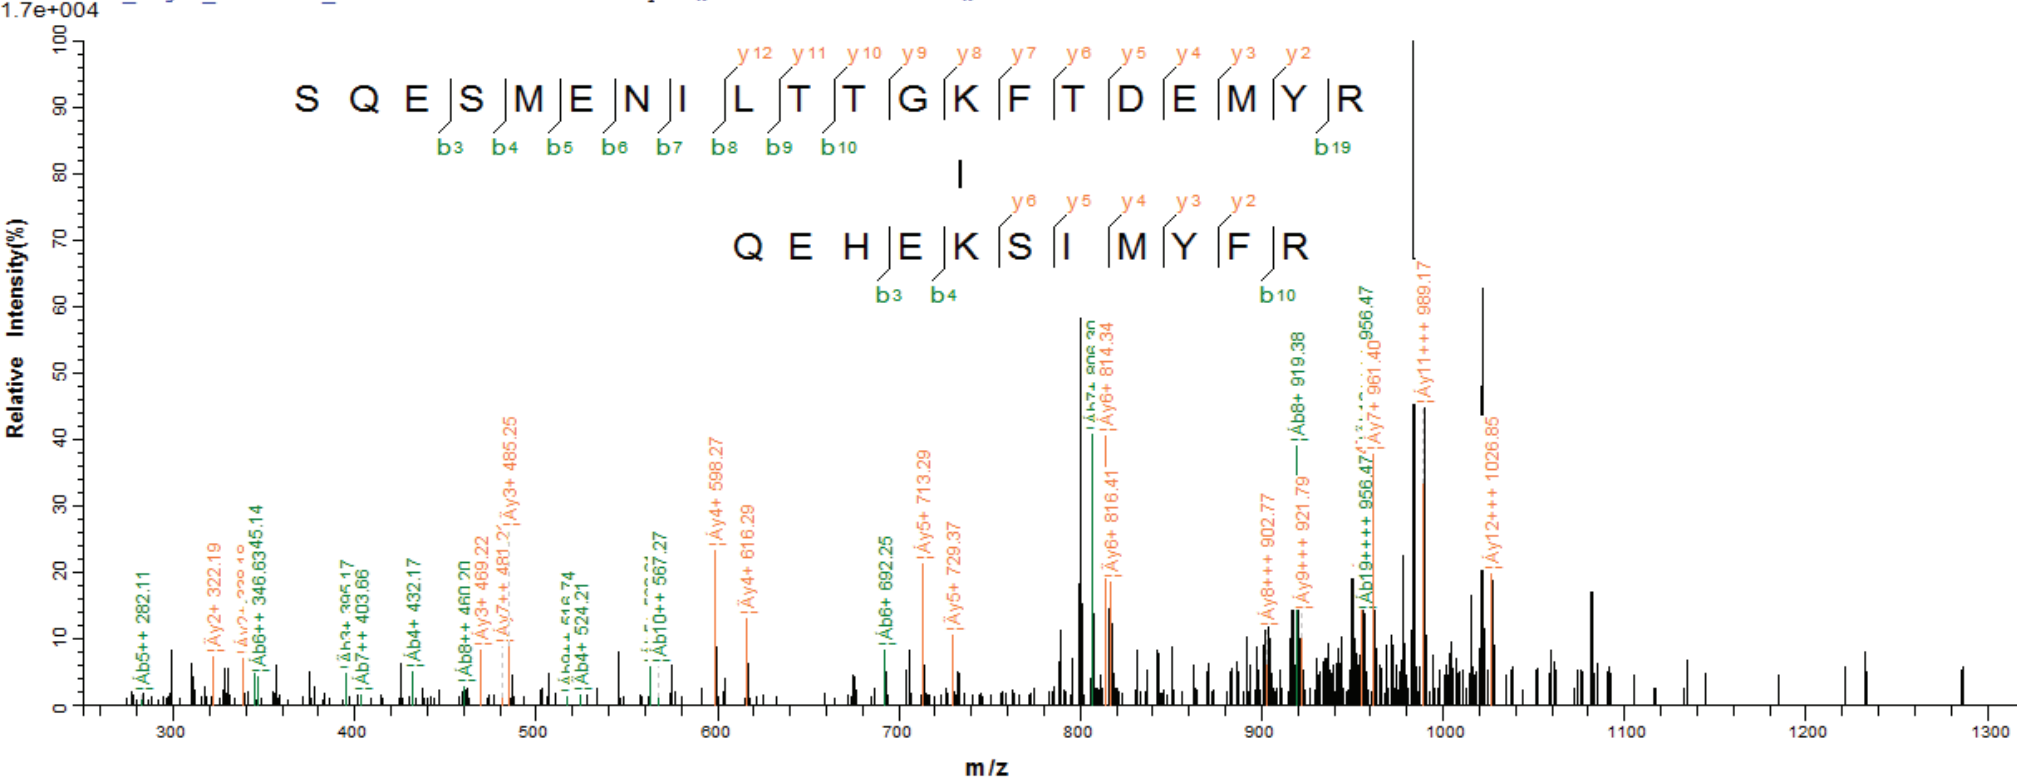

APC\_ingel\_06242014\_A9.6470.6470.4.dta

Seq: NISEELTRQNSLPSLQK-SVKWCIEDQLR

Mod: 25,C\_57 30,C\_57

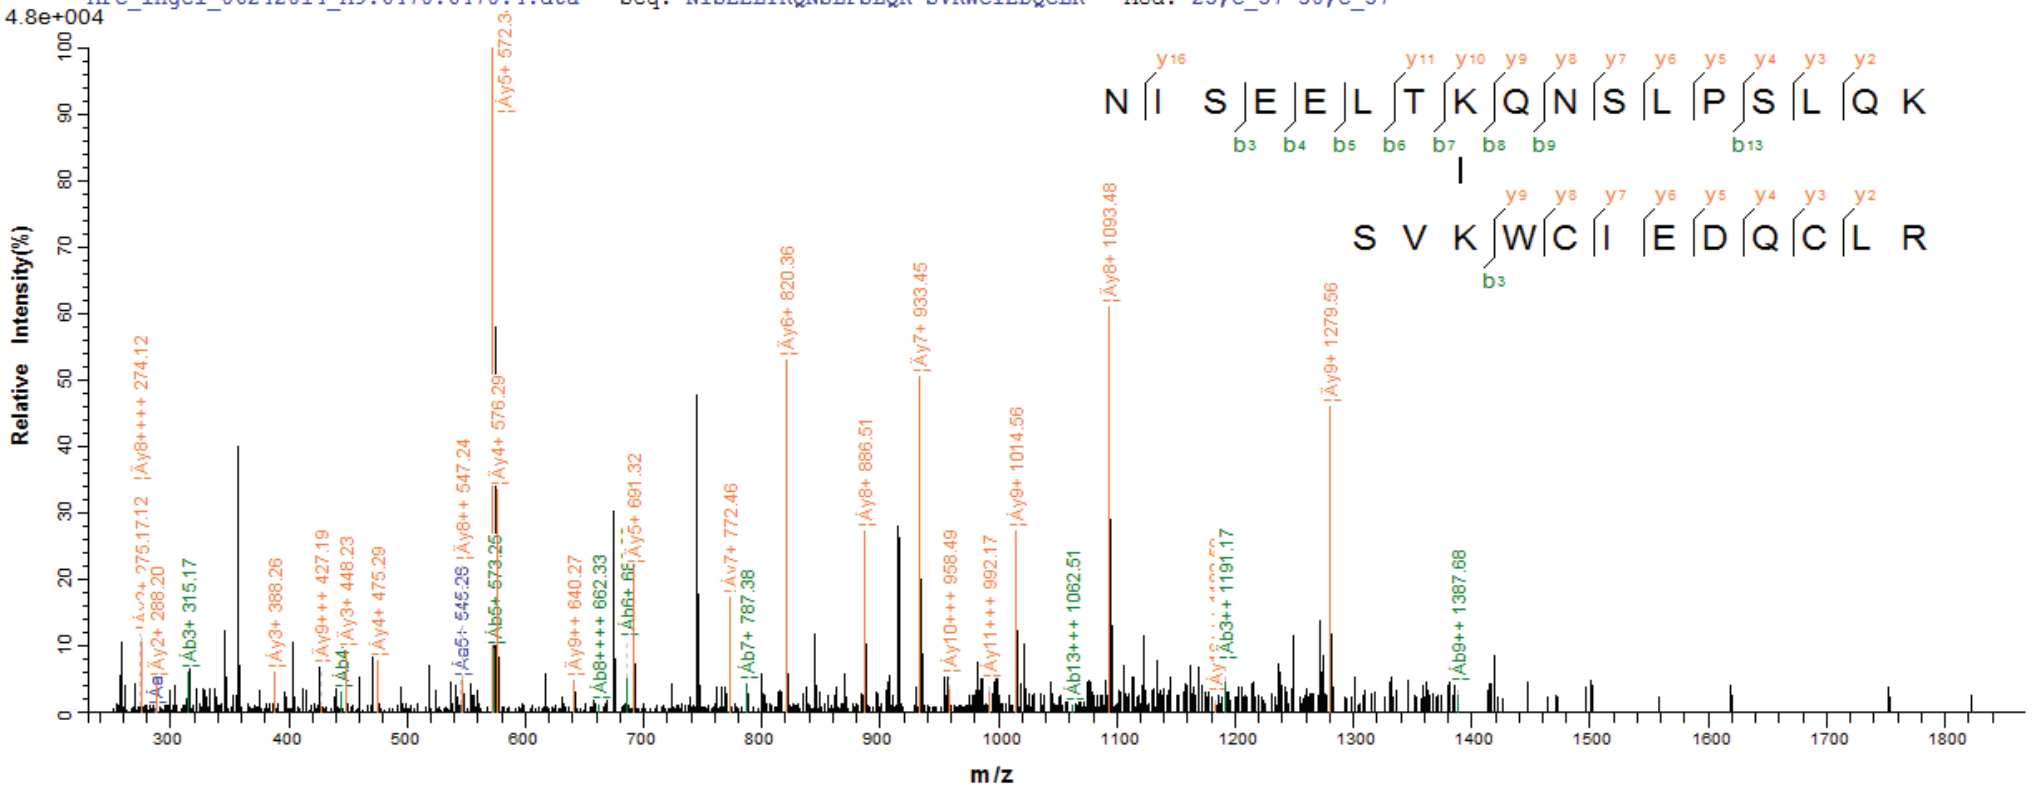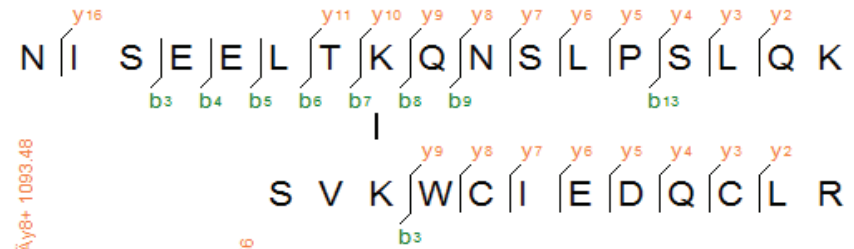

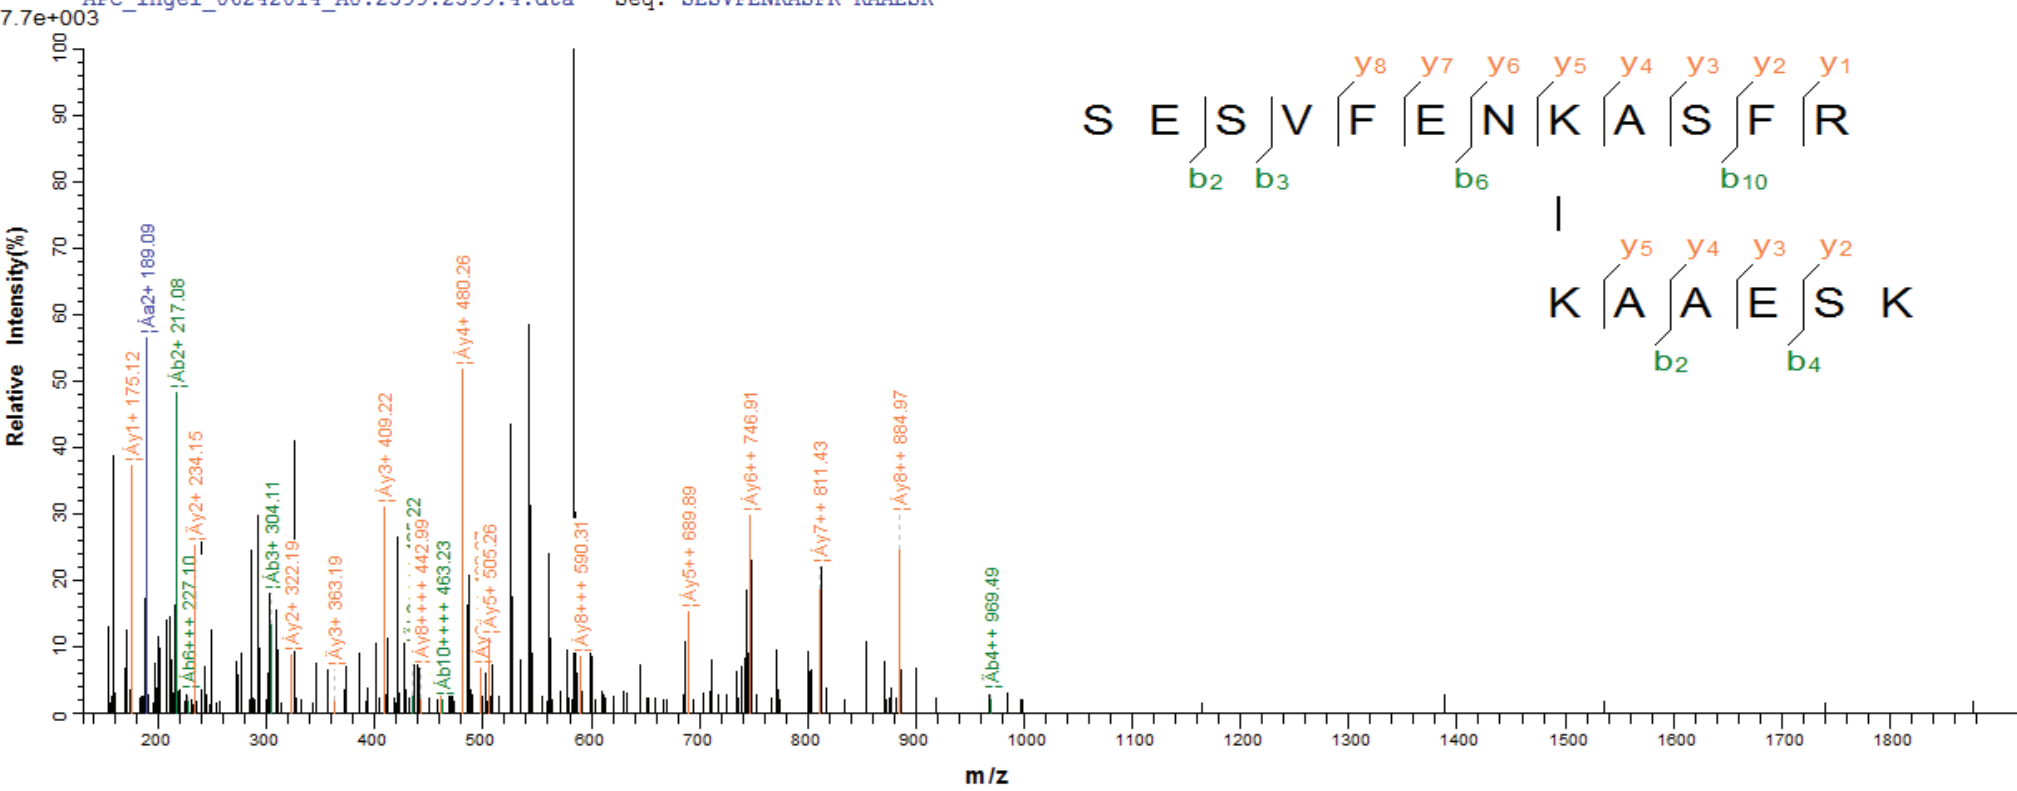

APC\_ingel\_06242014\_A7.10483.10483.5.dta

Seq: LYSSKWAAEALAGLAEAIIDVDQTHSLADESPLR-KAATELSR

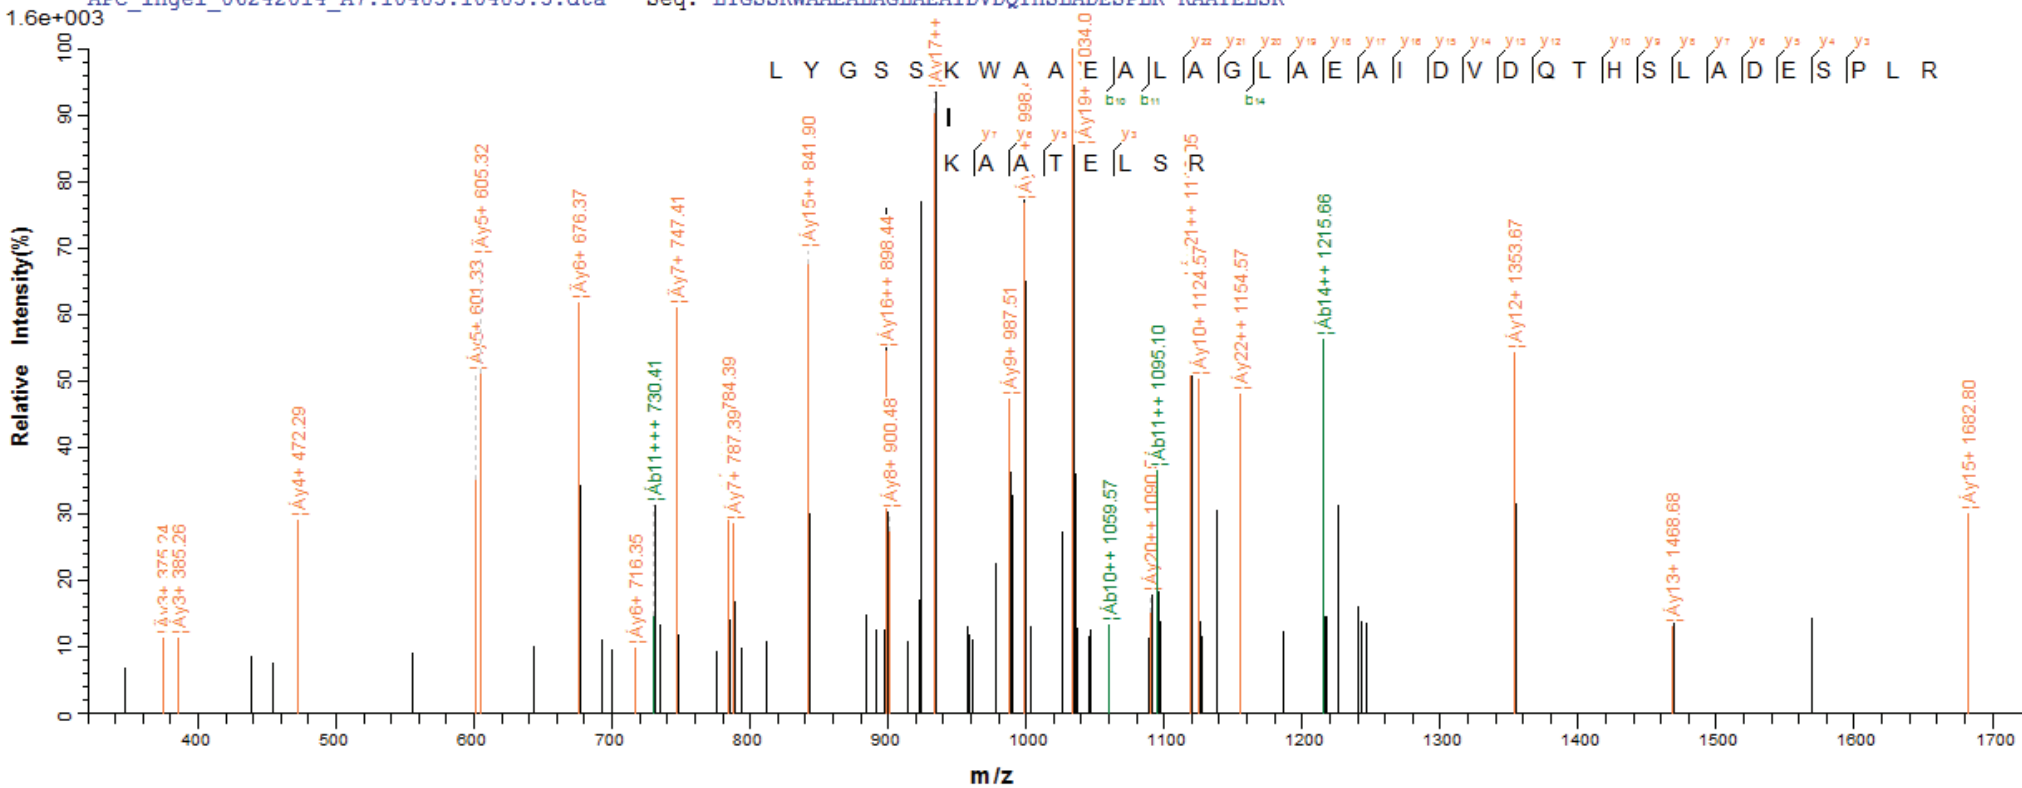



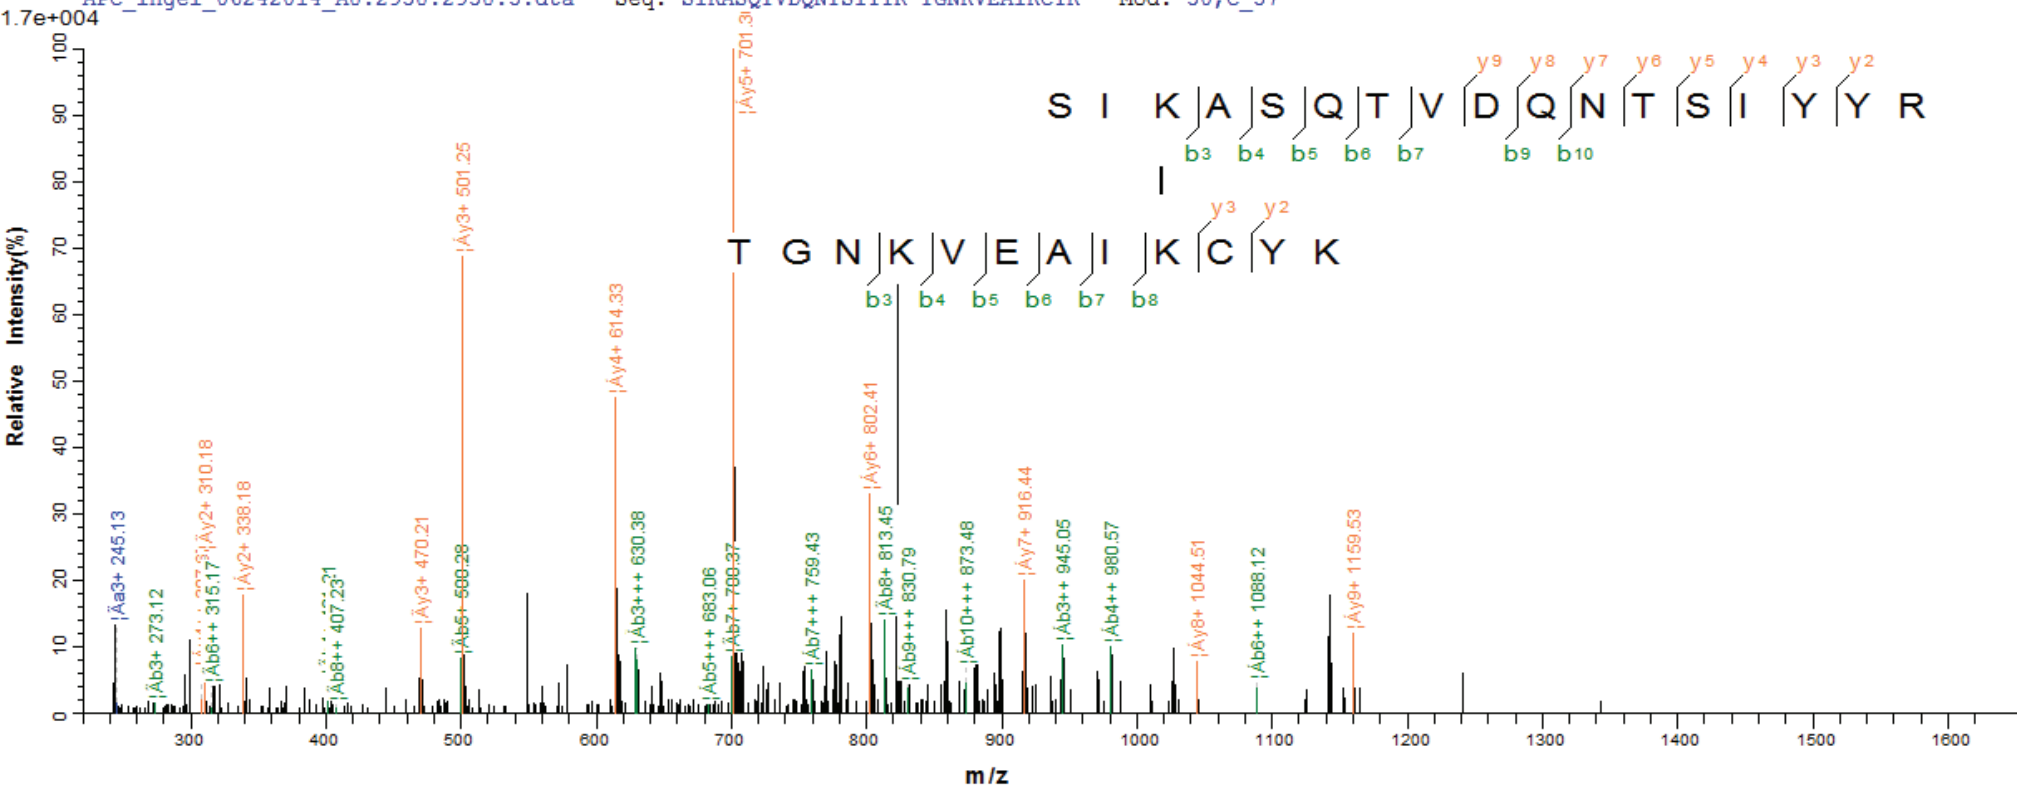

APC\_ingel\_06242014\_A9.5094.5094.4.dta Seq: GTEPSSIIDVKLYR-ILSKK

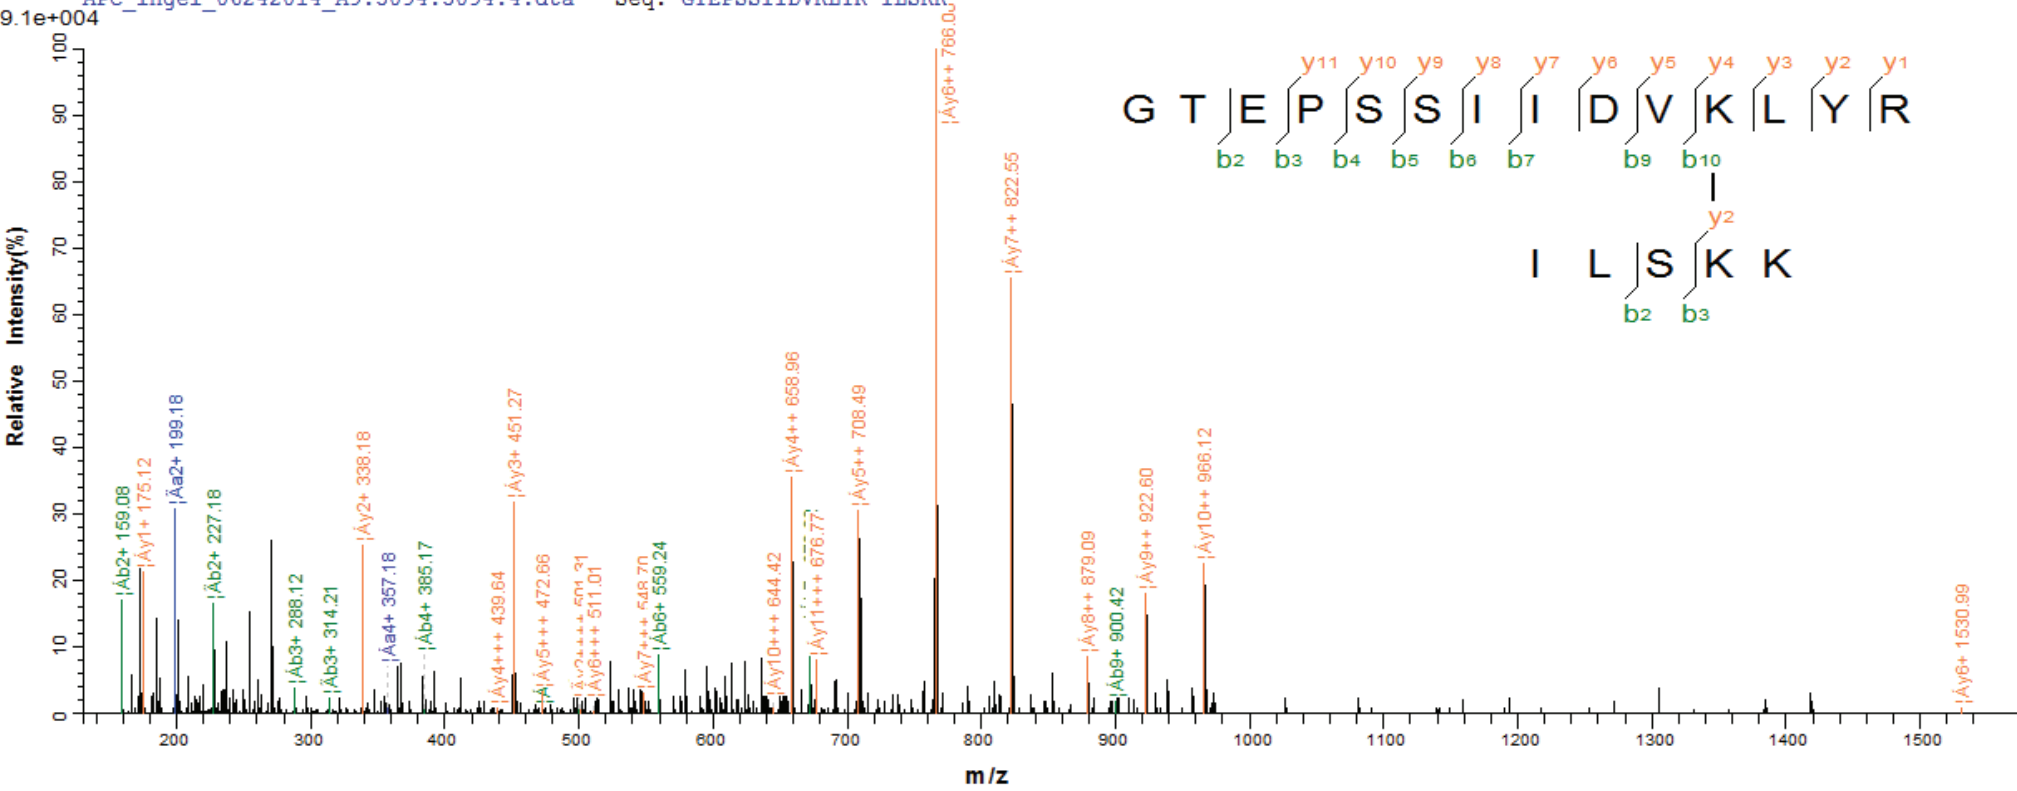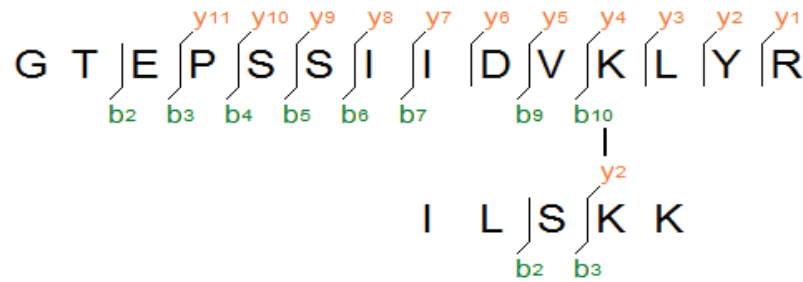

APC\_ingel\_06242014\_A7.11296.11296.4.dta

Seq: KWDSSLLGLGDDLPEDVYDSSDVEQNVMYEDLTTK-LAAGISLGLINLGAGQTKLR

Mod: 28,\_Oxidation\_M\_15.995

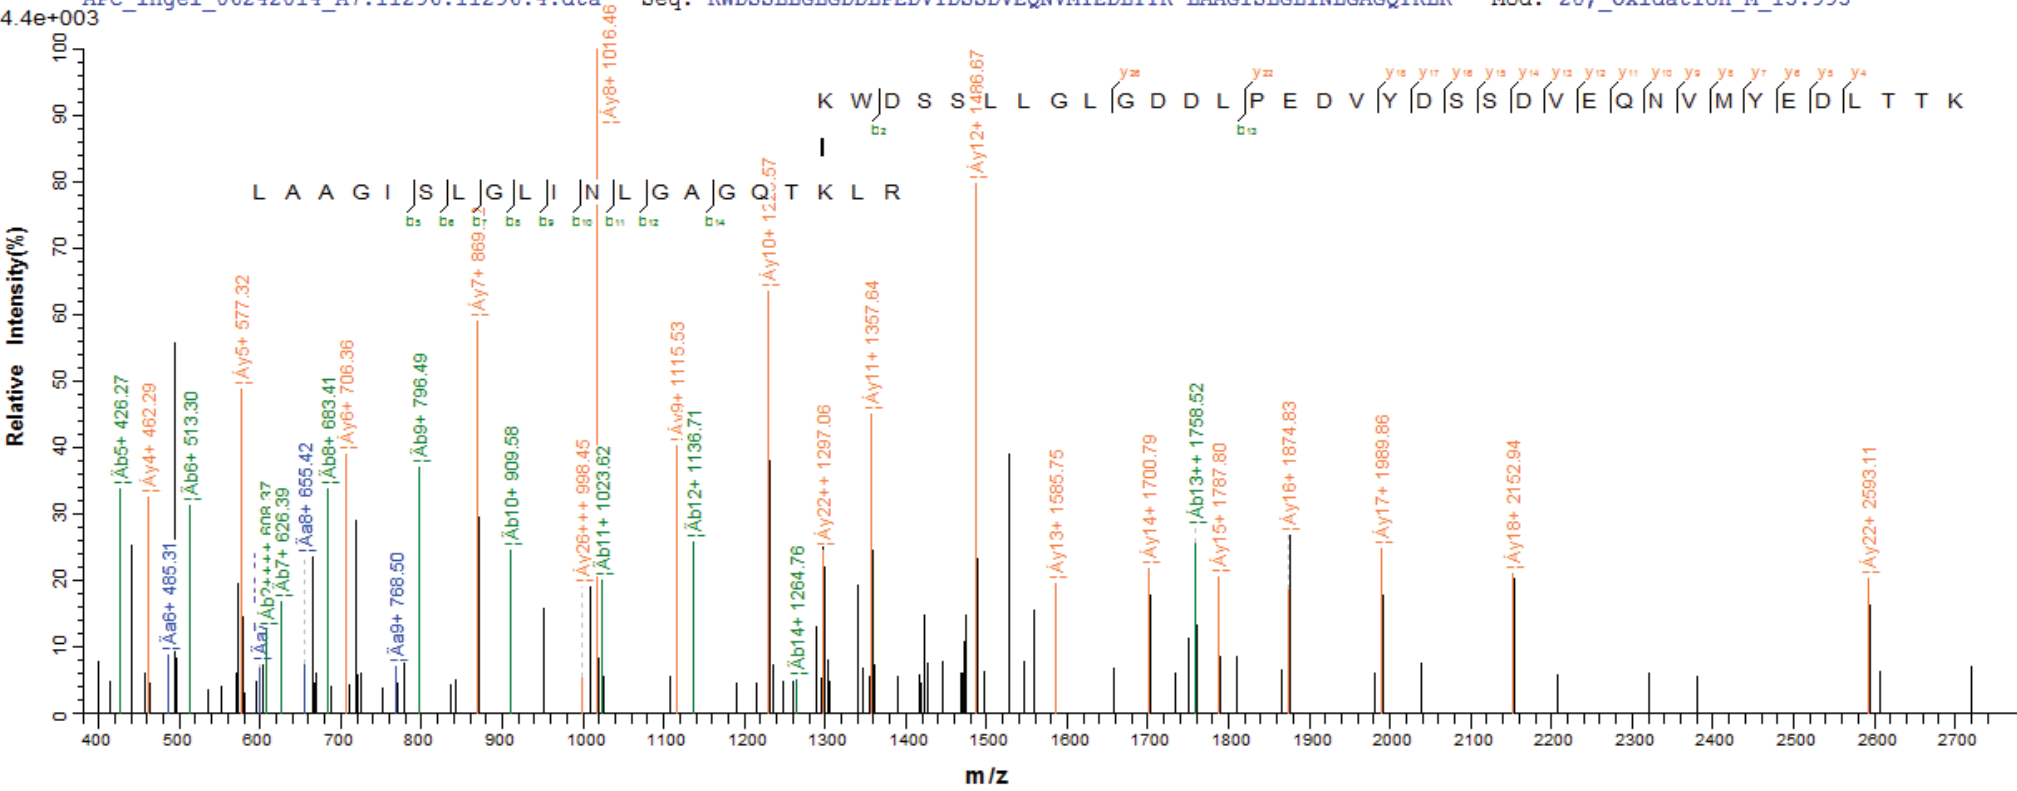

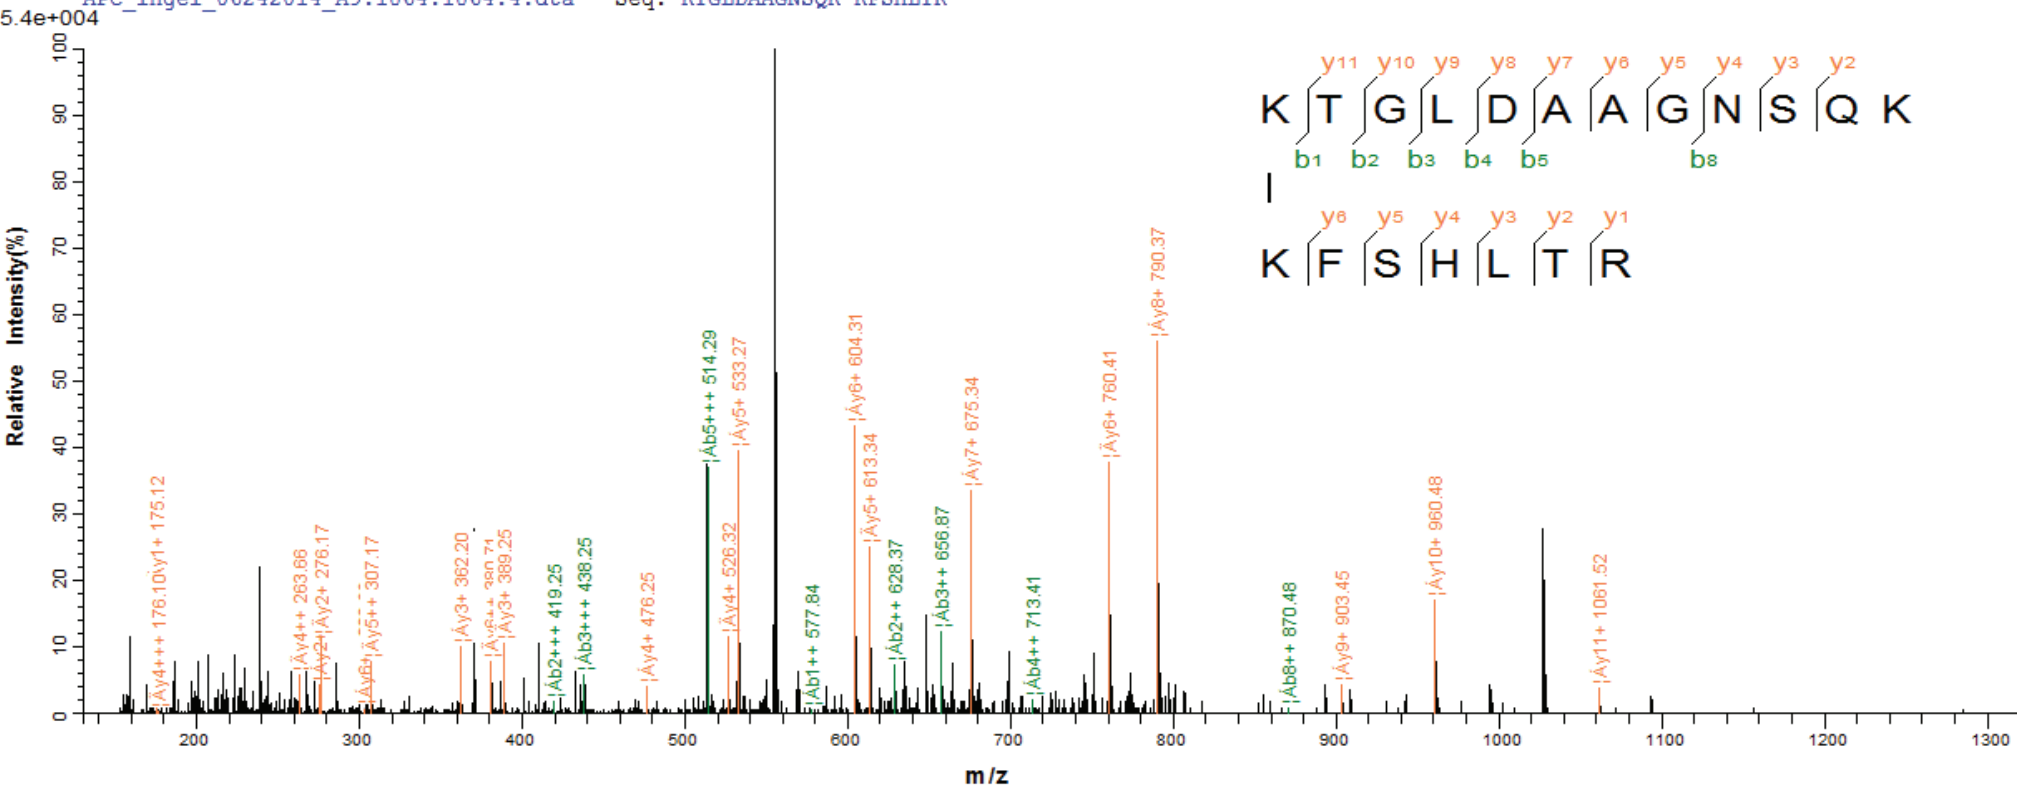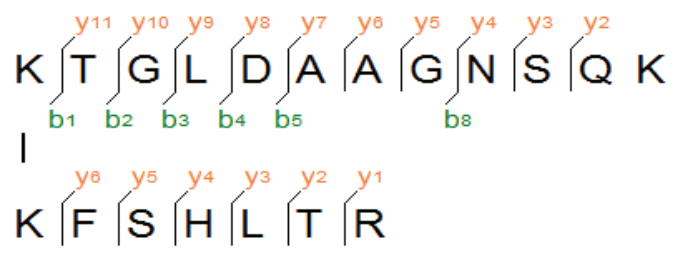

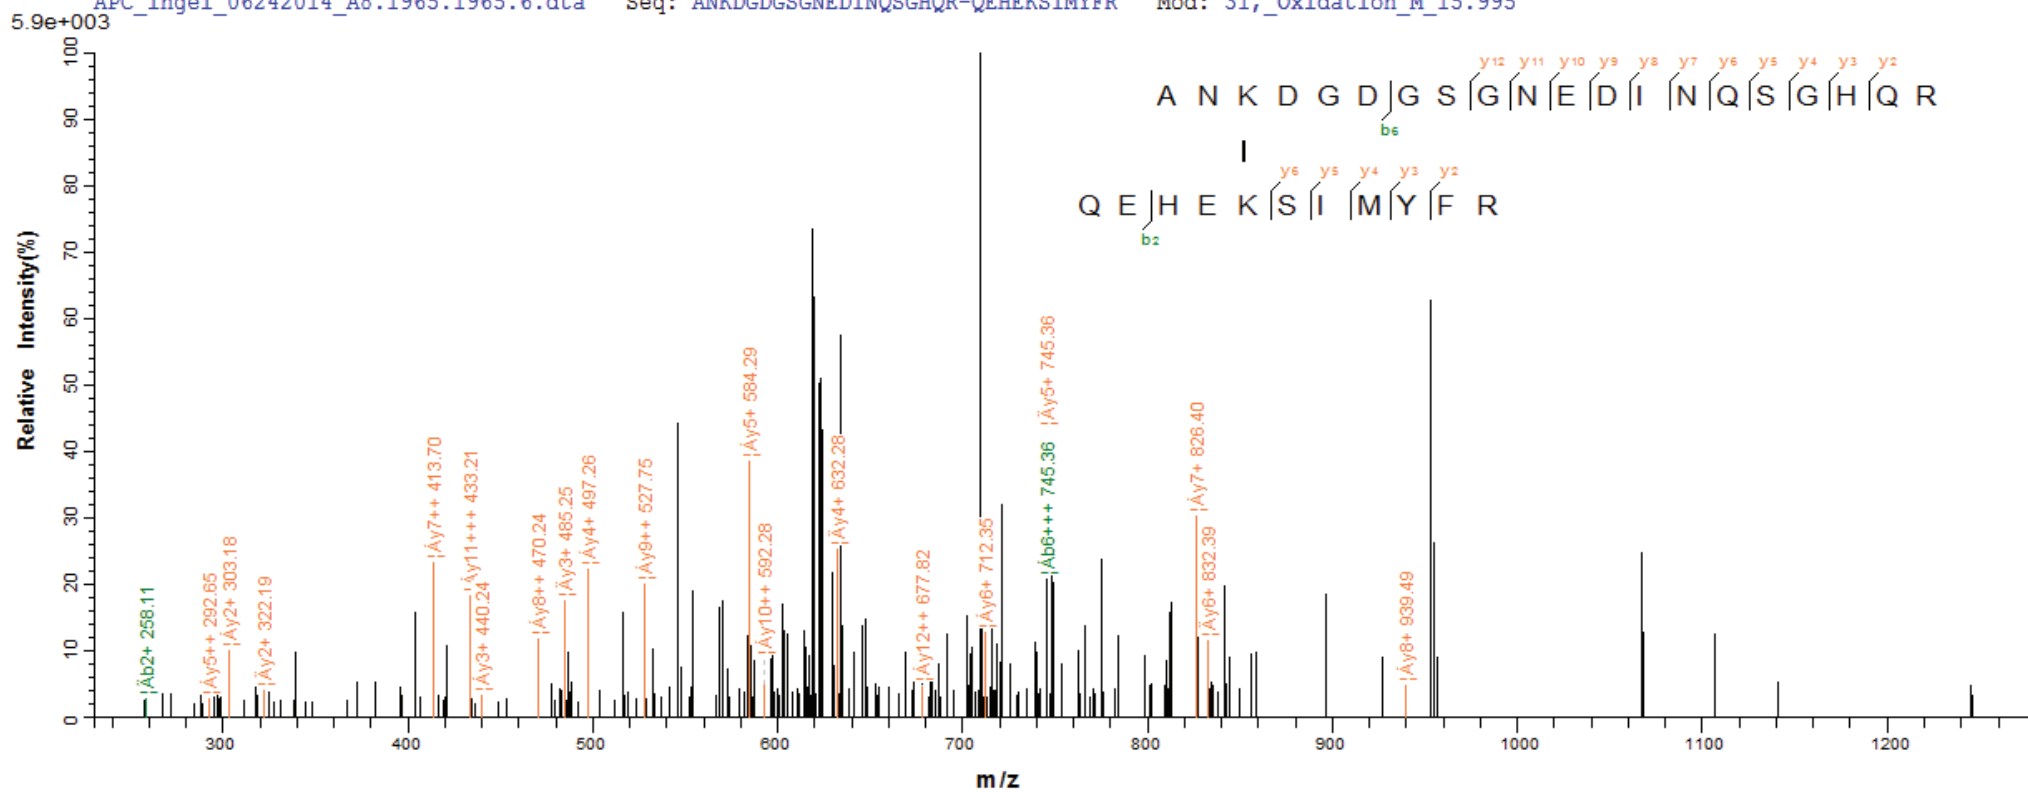

APC\_ingel\_06242014\_A8.6148.6148.6.dta

Seq: ITVKAPEDIAHDIVEWGFHAGVSSGLR-KYFAK

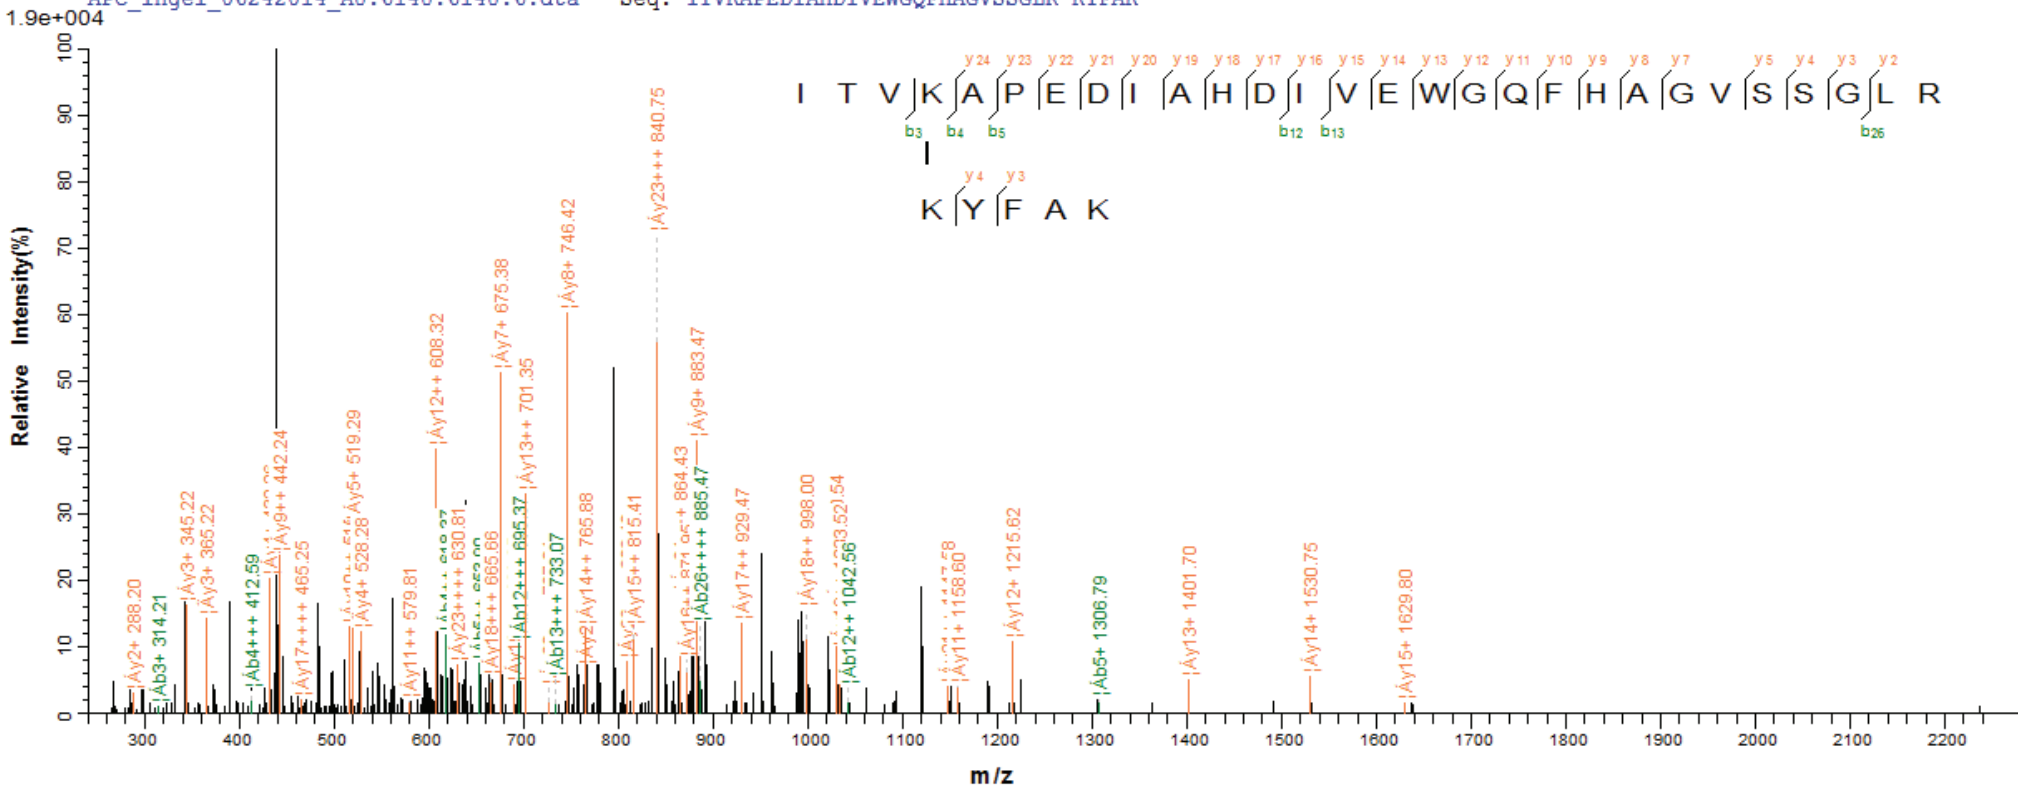

APC\_ingel\_06242014\_A8.8048.8048.5.dta

Seq: NNLDGVNLCRYLLGLSFVKLQR-GKIYFAQNNFNK

Mod: 10,C\_57

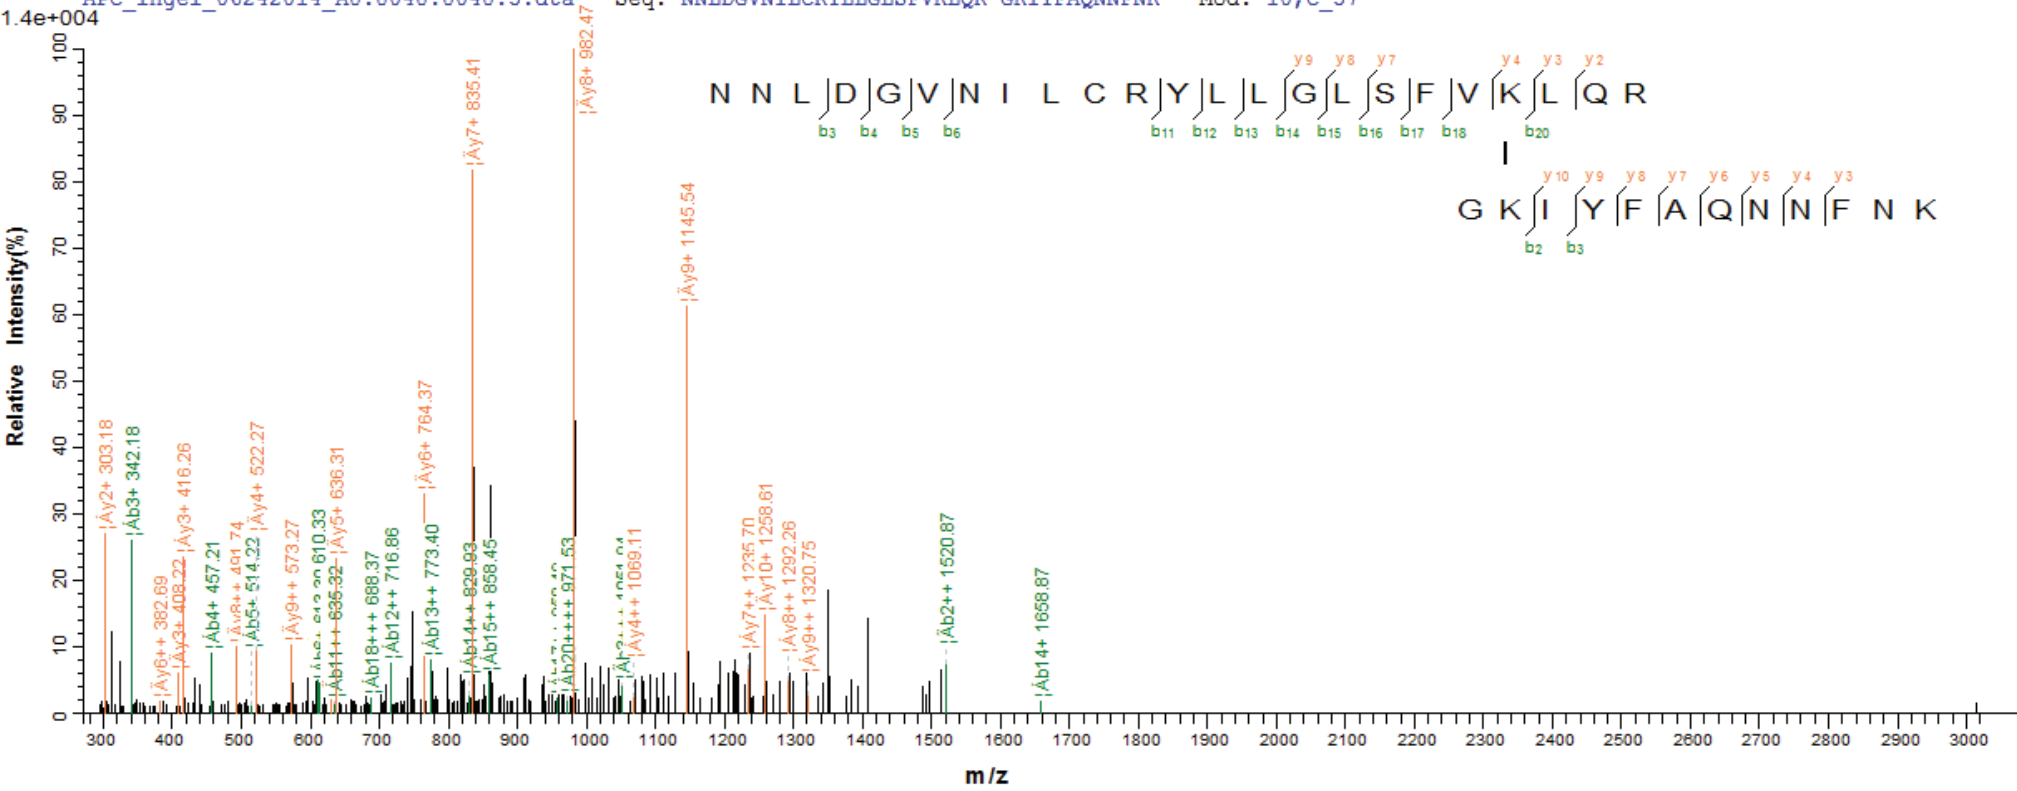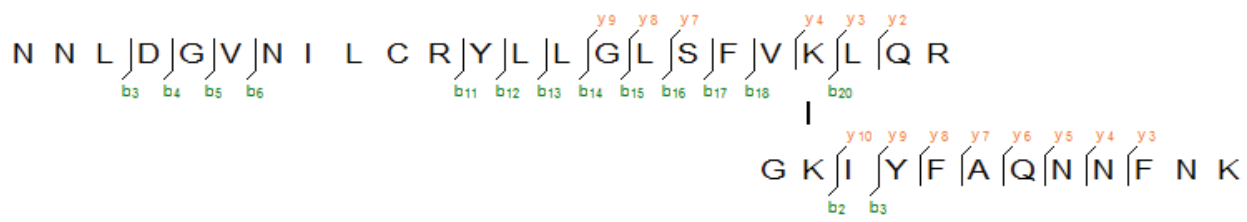

APC\_ingel\_06242014\_A8.3503.3503.5.dta

Seq: LEYNYNSHNVYIMADKQK

Mod: 13, Oxidation\_M\_15.995

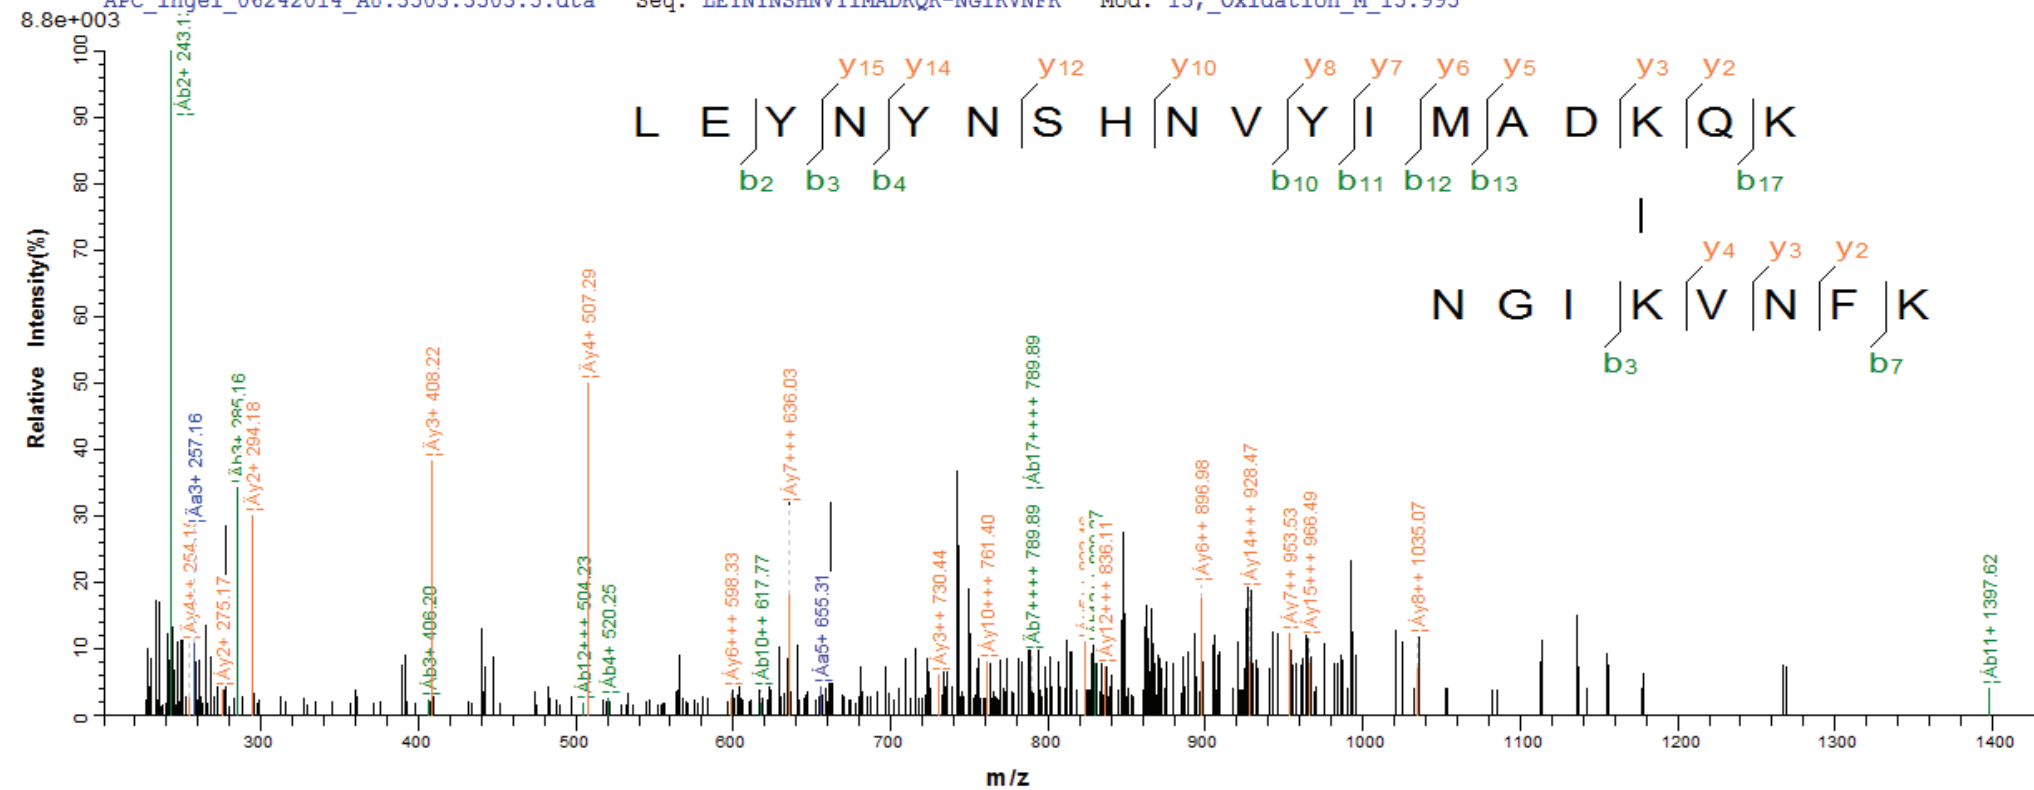



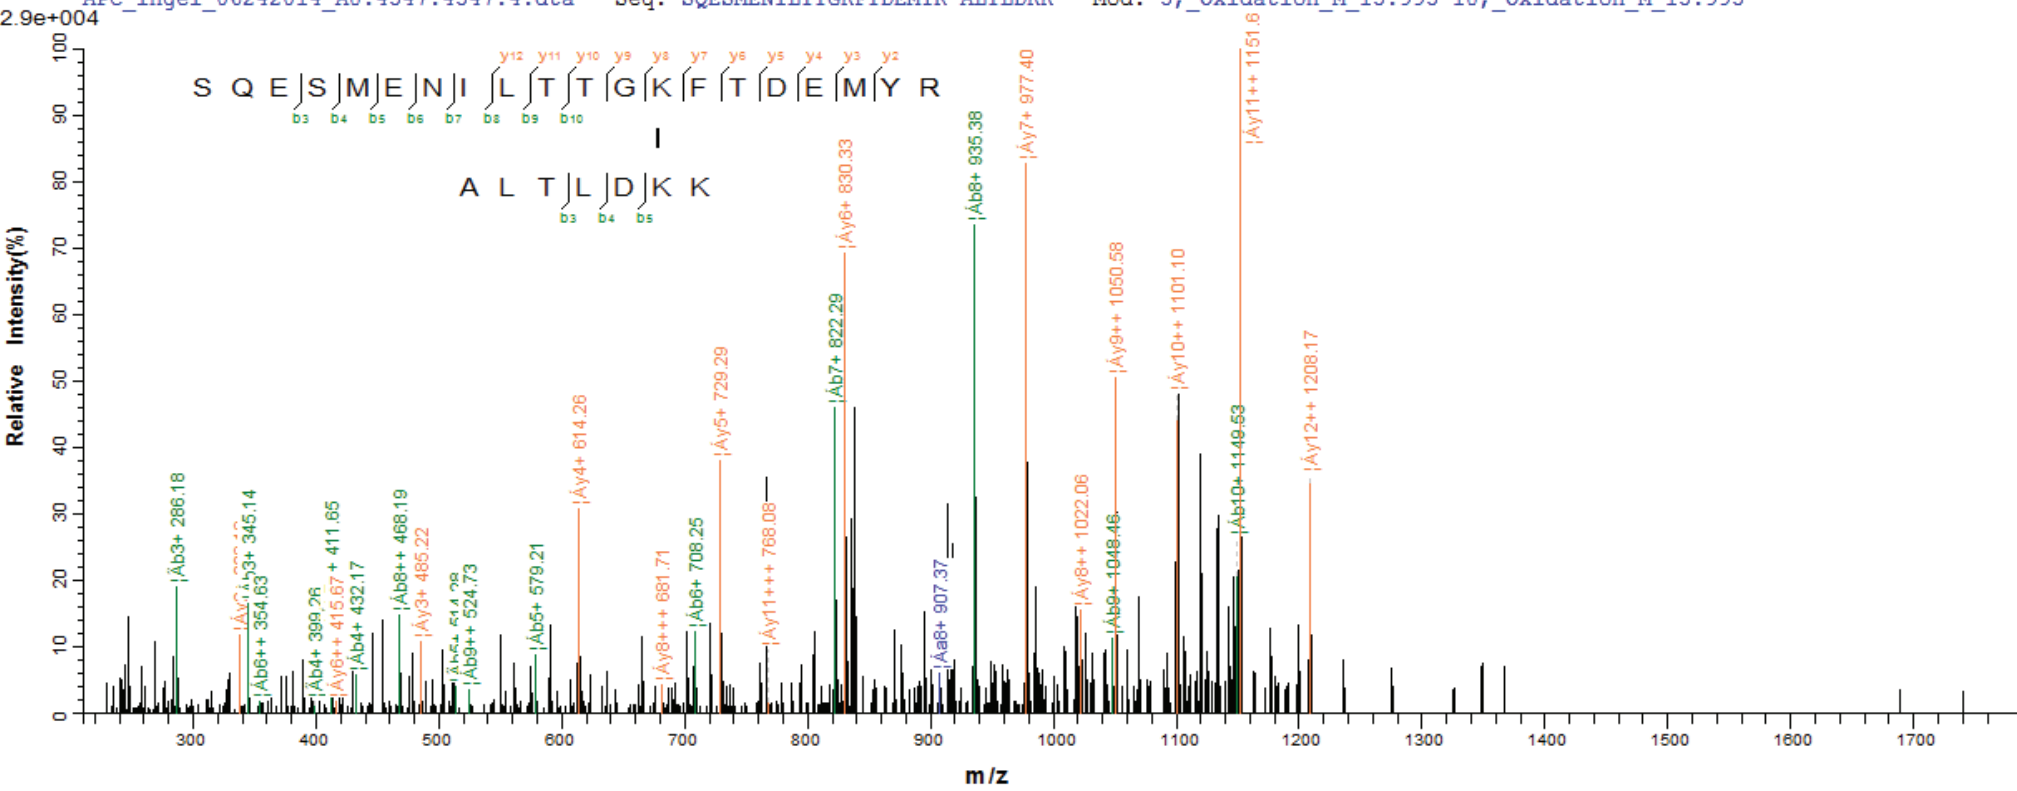

APC\_ingel\_06242014\_A8.3866.3866.4.dta Seq: SSLTYDPVNMMAKR-TQKEIFDQNNK

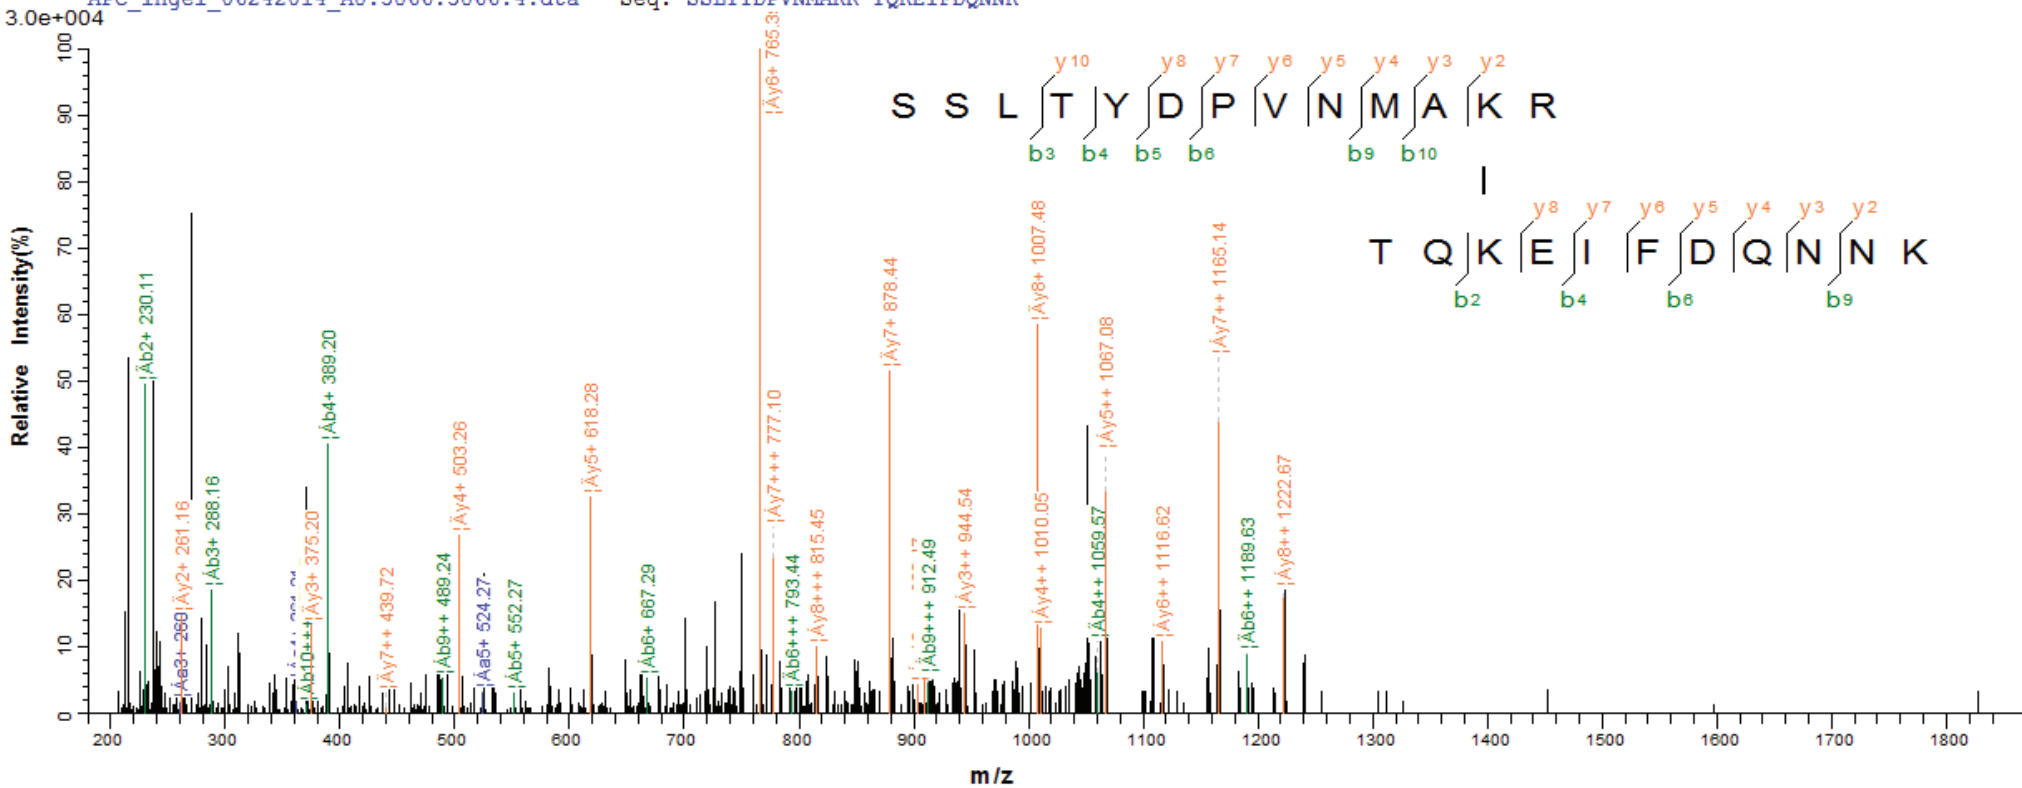

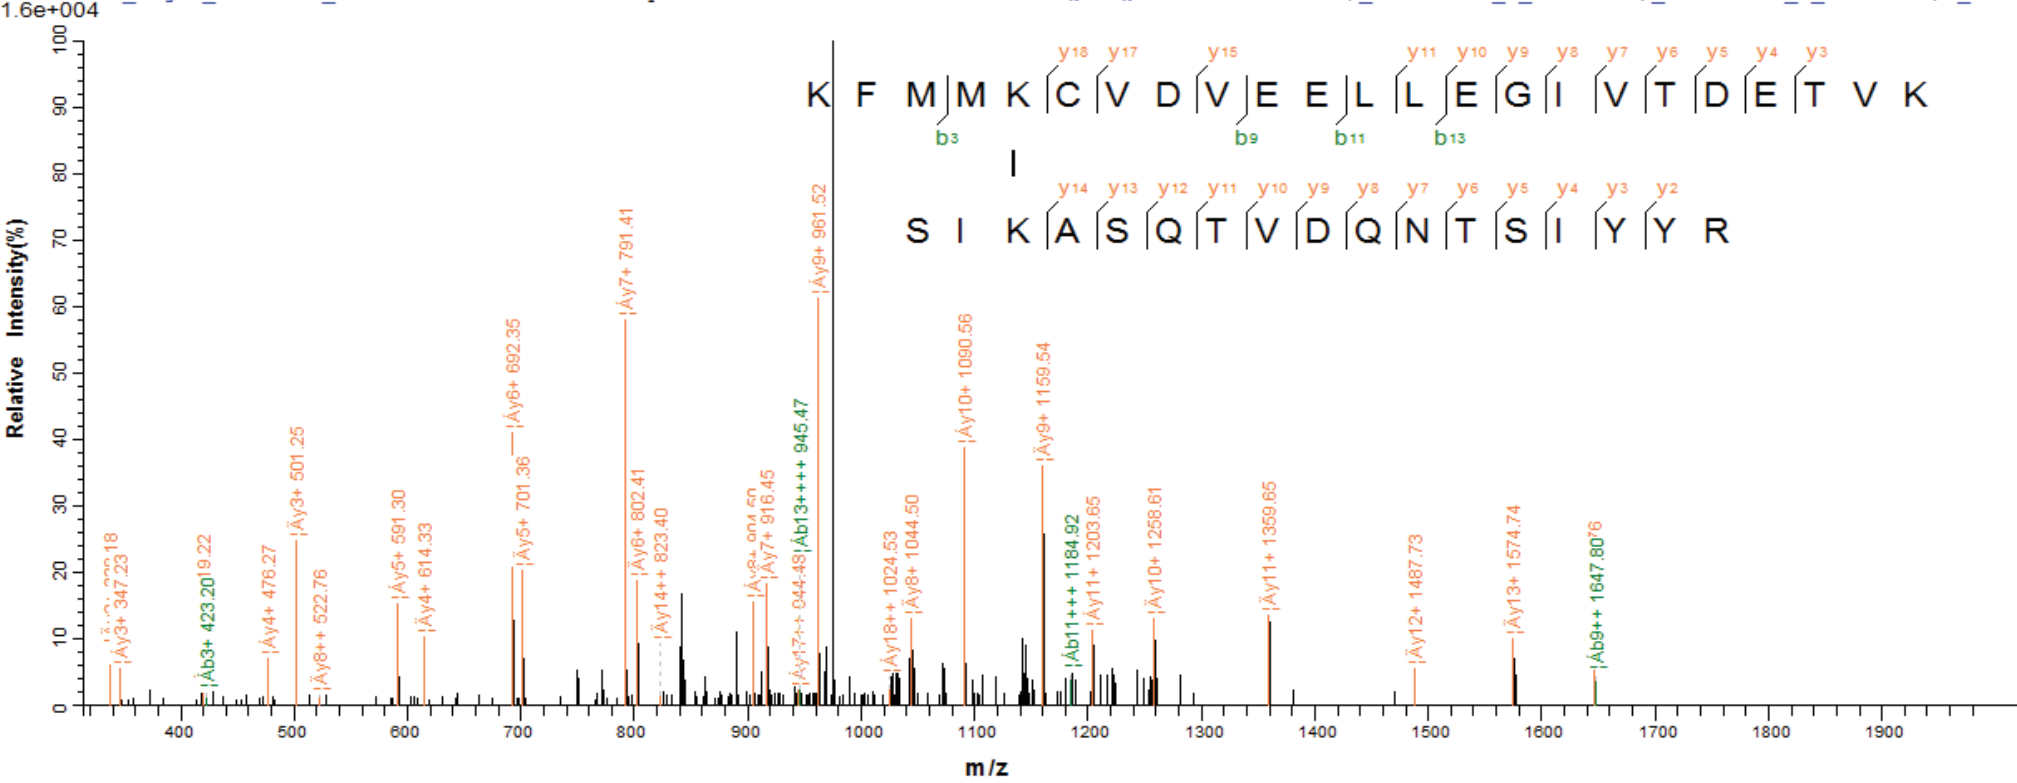

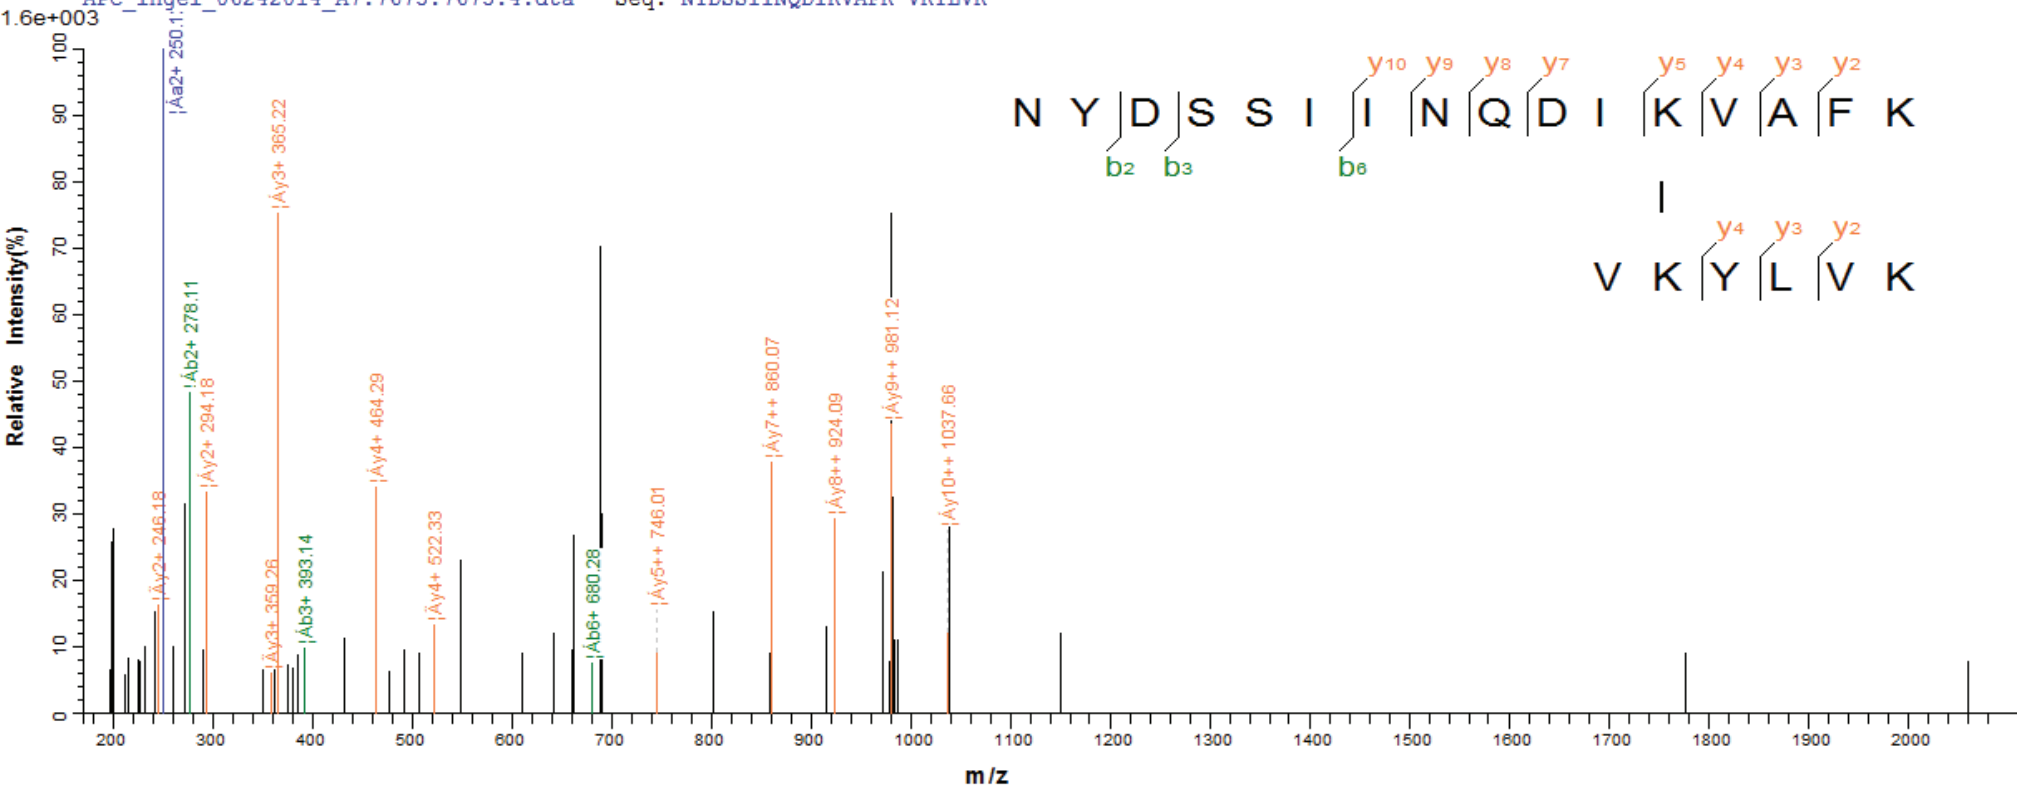

APC\_ingel\_06242014\_A8.4195.4195.4.dta

Seq: DYKLDNVDVVR-SKVDICYTQCK

Mod: 21,C\_57 25,C\_57

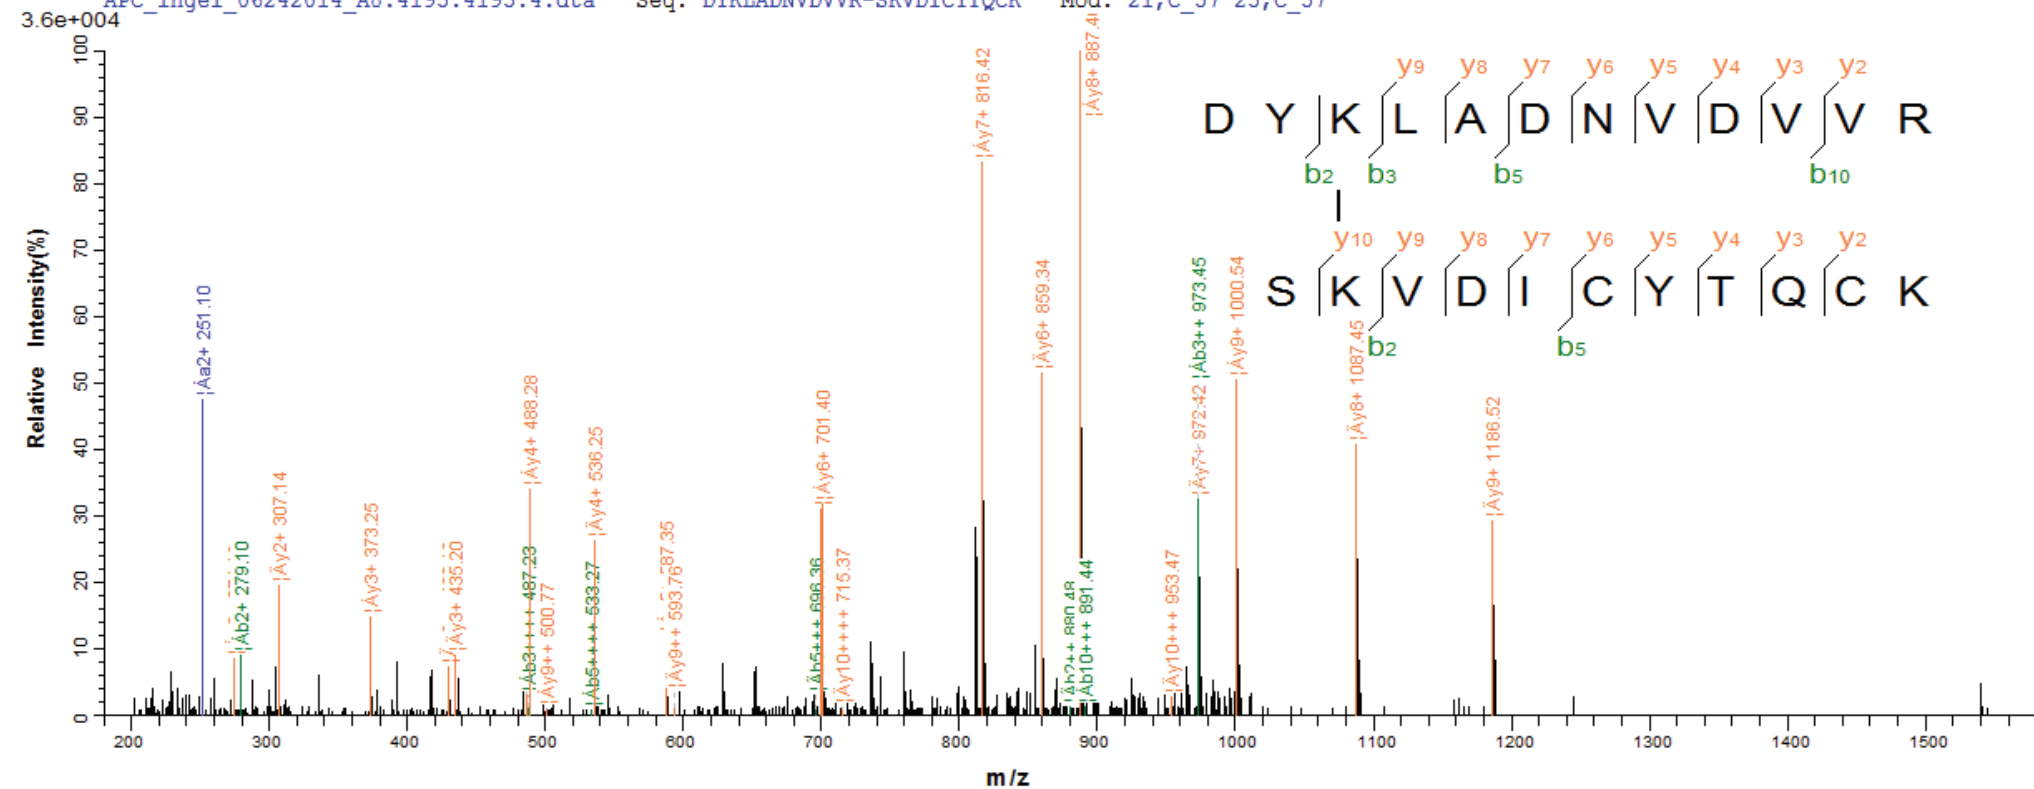

APC\_A9\_140131205754.003981.003981.4.dta

Seq: KTGLDAAGNSQK-KGELTISSTK

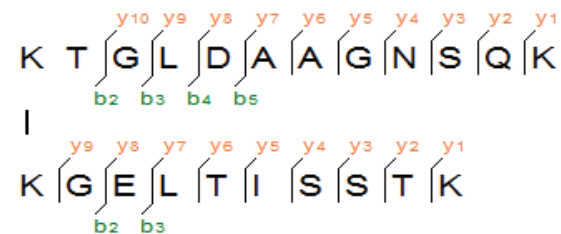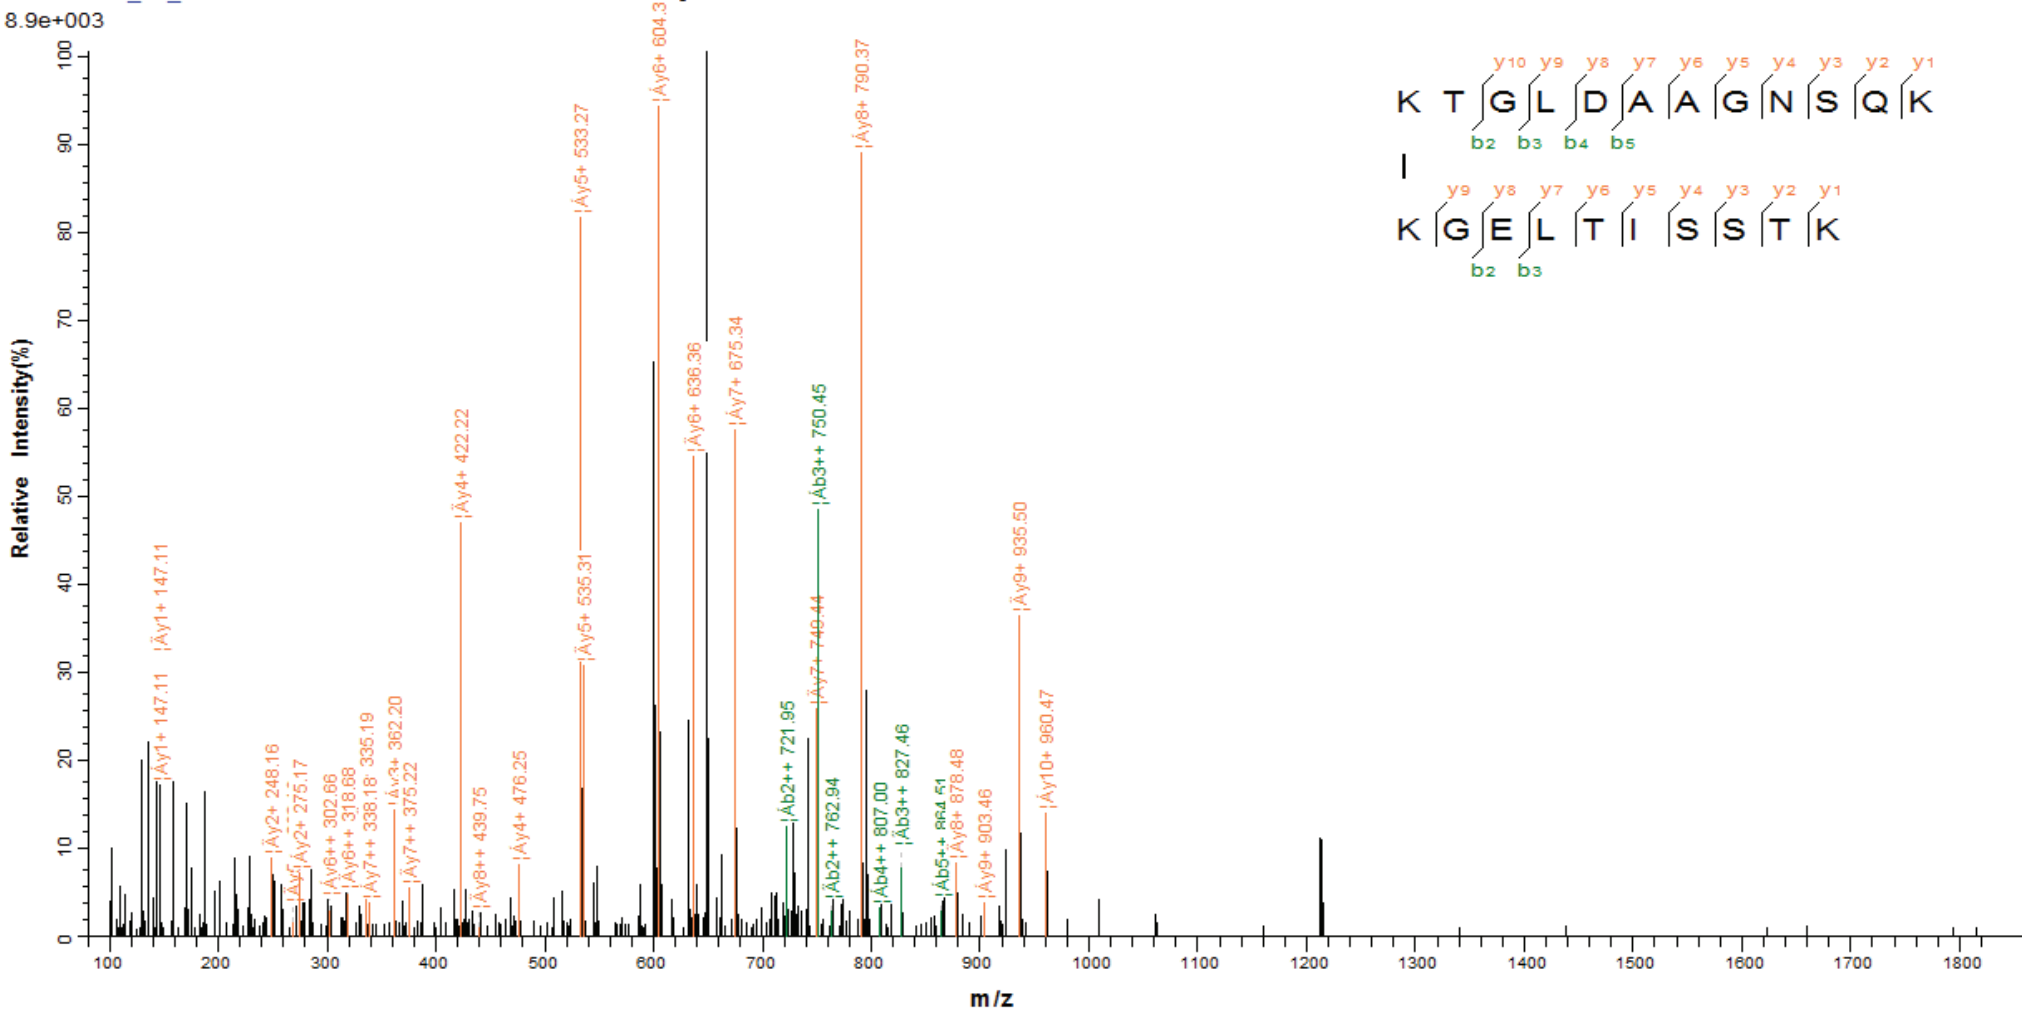

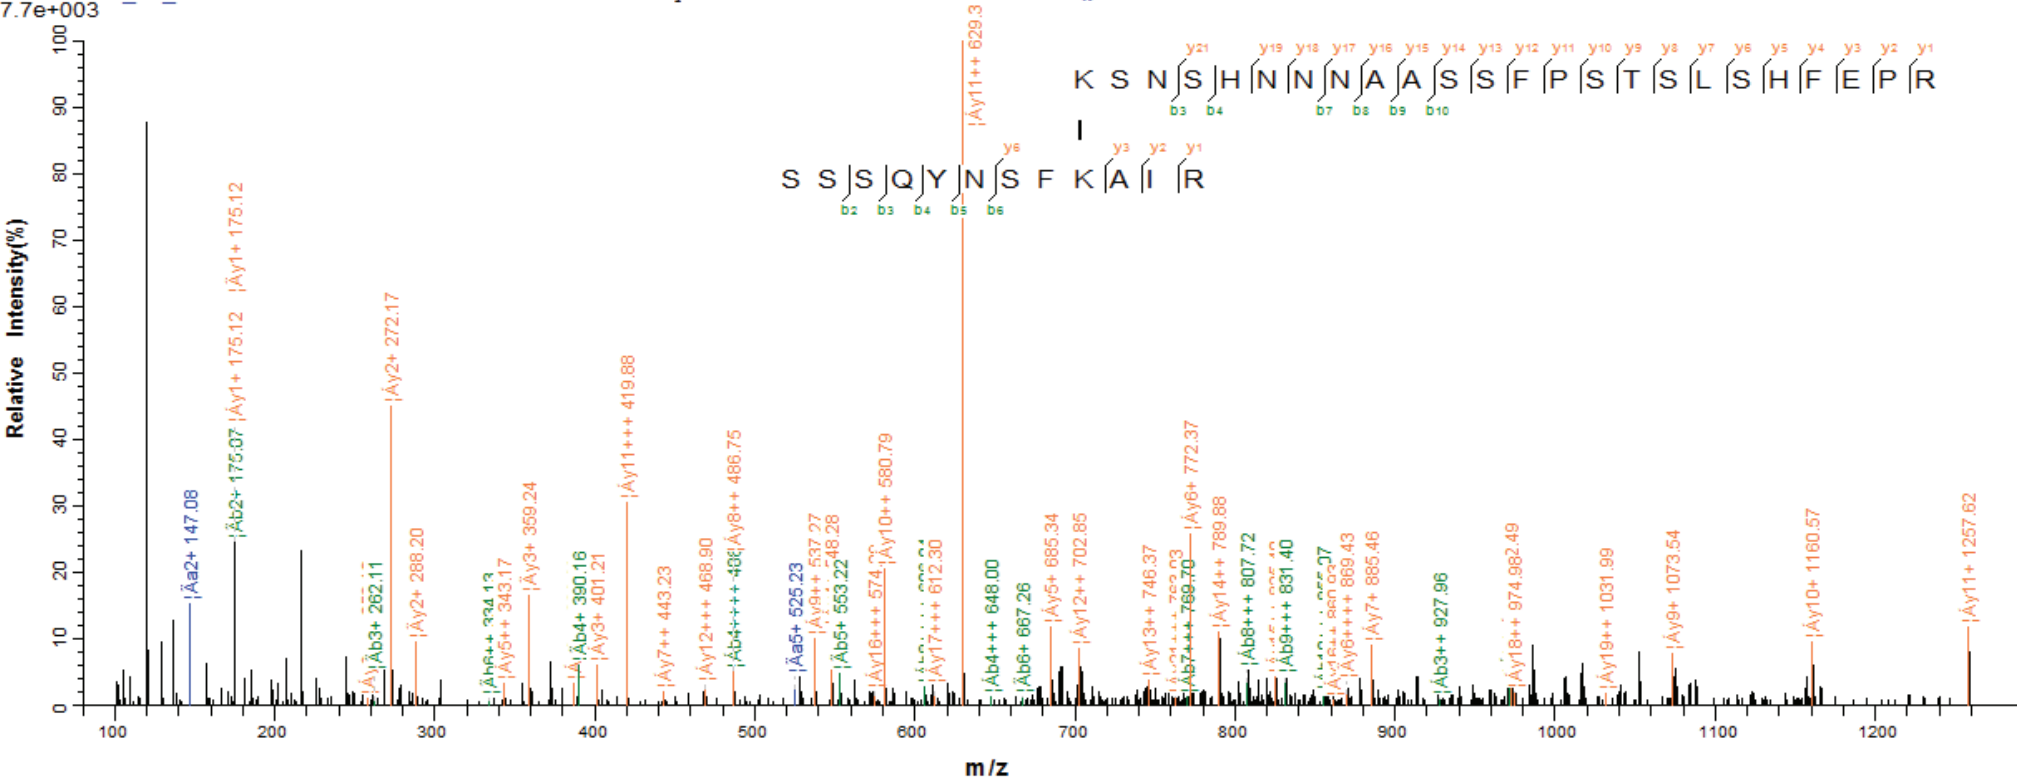

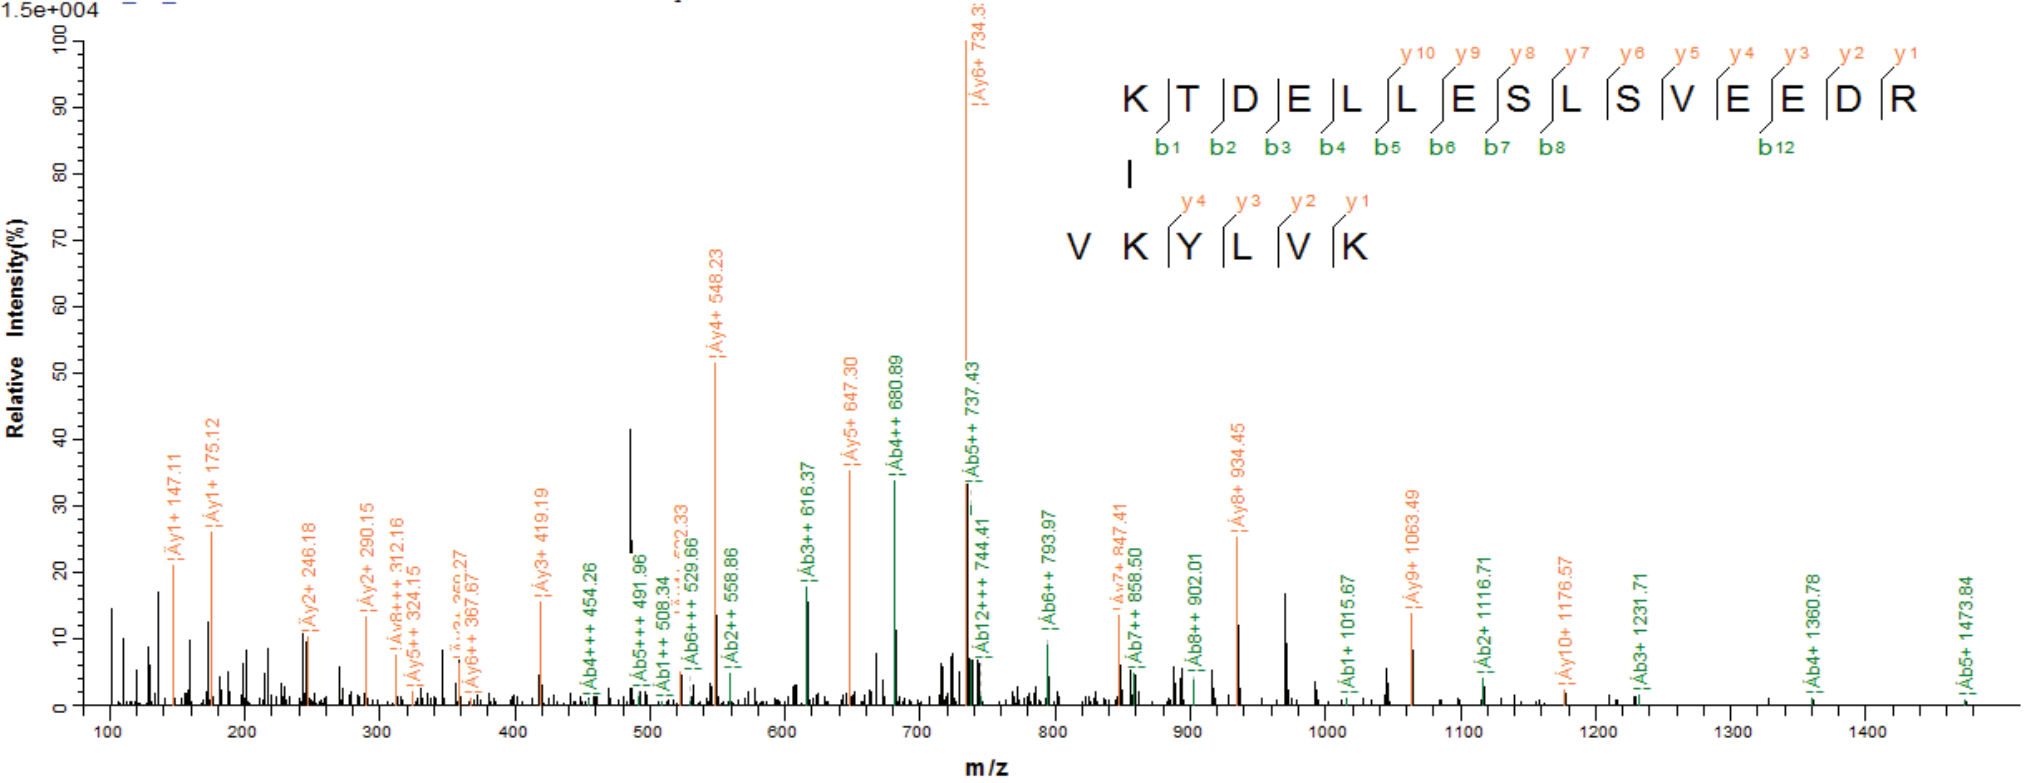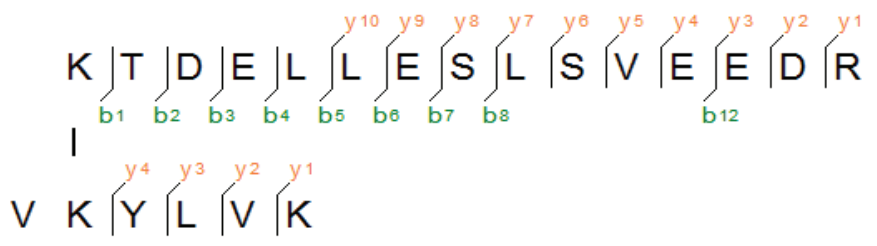



APC\_A8\_140201121226.006917.006917.4.dta

Seq: SSNGSDISPTAYLEDKK-YFAKIMALR

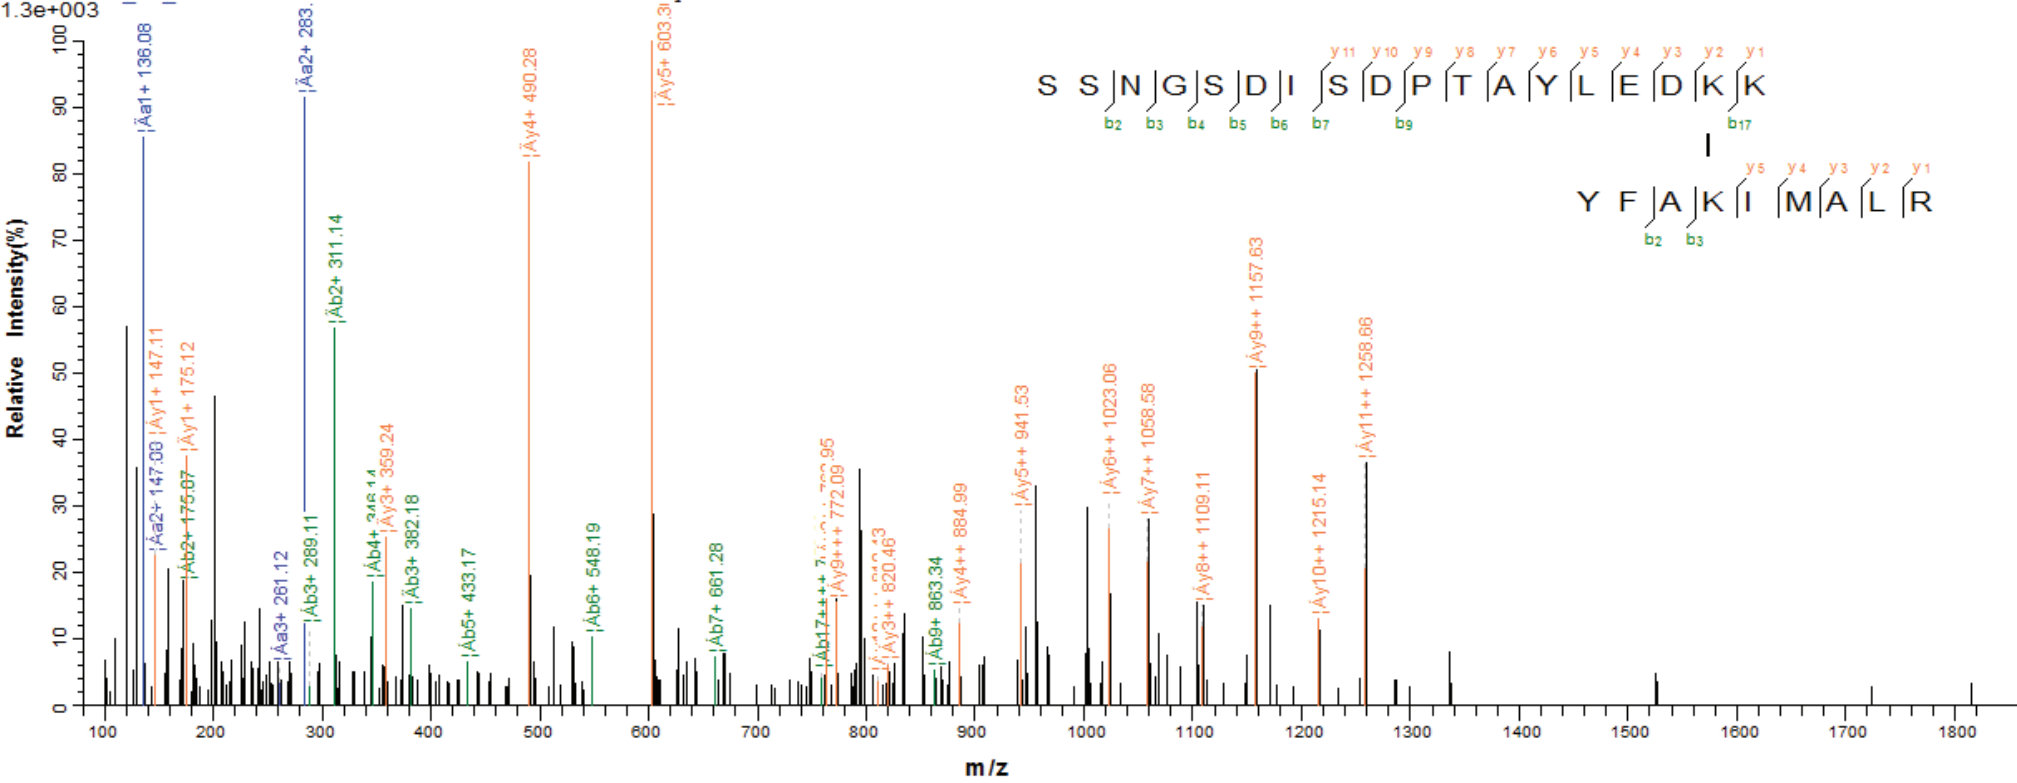

S S | N | G | S | D | I | S | D | P | T | A | Y | L | E | D | K | K  
b2 b3 b4 b5 b6 b7 b9 y11 y10 y9 y8 y7 y6 y5 y4 y3 y2 y1

Y F | A | K | I | M | A | L | R  
b2 b3 y5 y4 y3 y2 y1

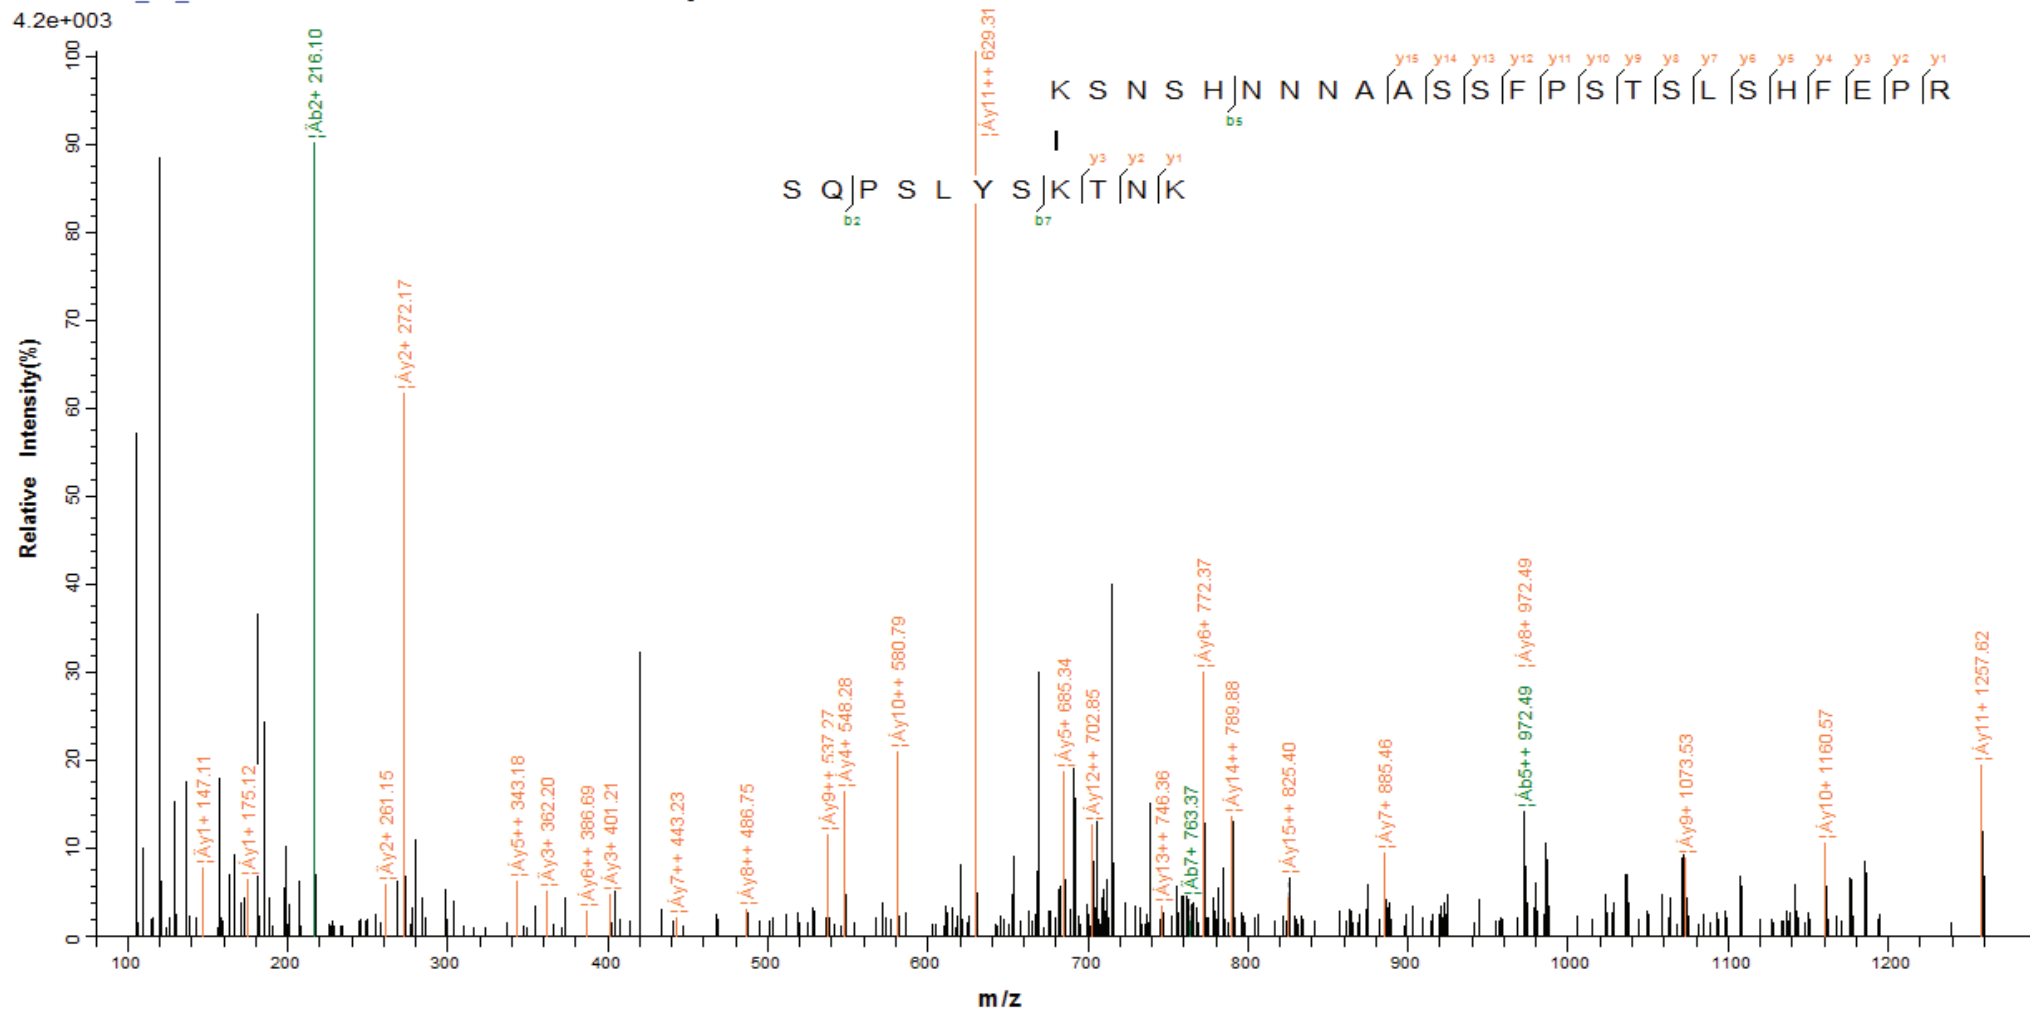

1.1e+003 PC\_A7.003560.003560.6.dta

Seq: VLDHLAPSELIKPVK-SCHNKPSVLVDDR

Mod: 20,C\_57

Charge: 6 Score: 2.50e-007

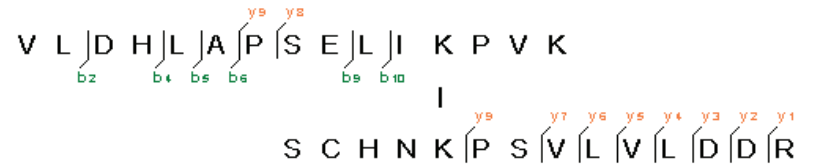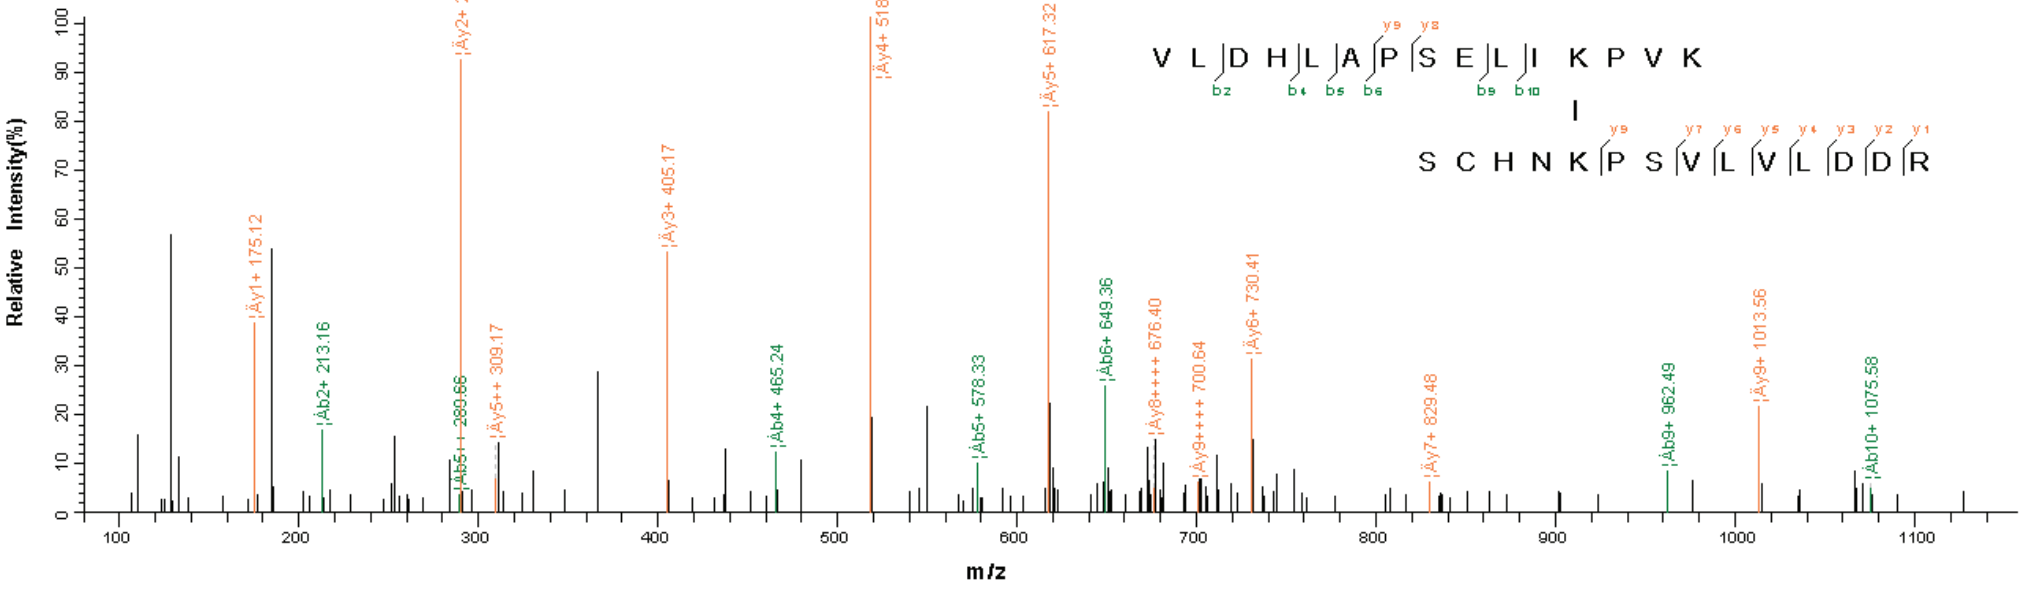

APC\_A7.004262.004262.5.dta    Seq: VKMHGYFPLEVNF<sup>y7</sup>T<sup>y6</sup>K<sup>y5</sup>ILEDKLSEVR<sup>y4</sup>

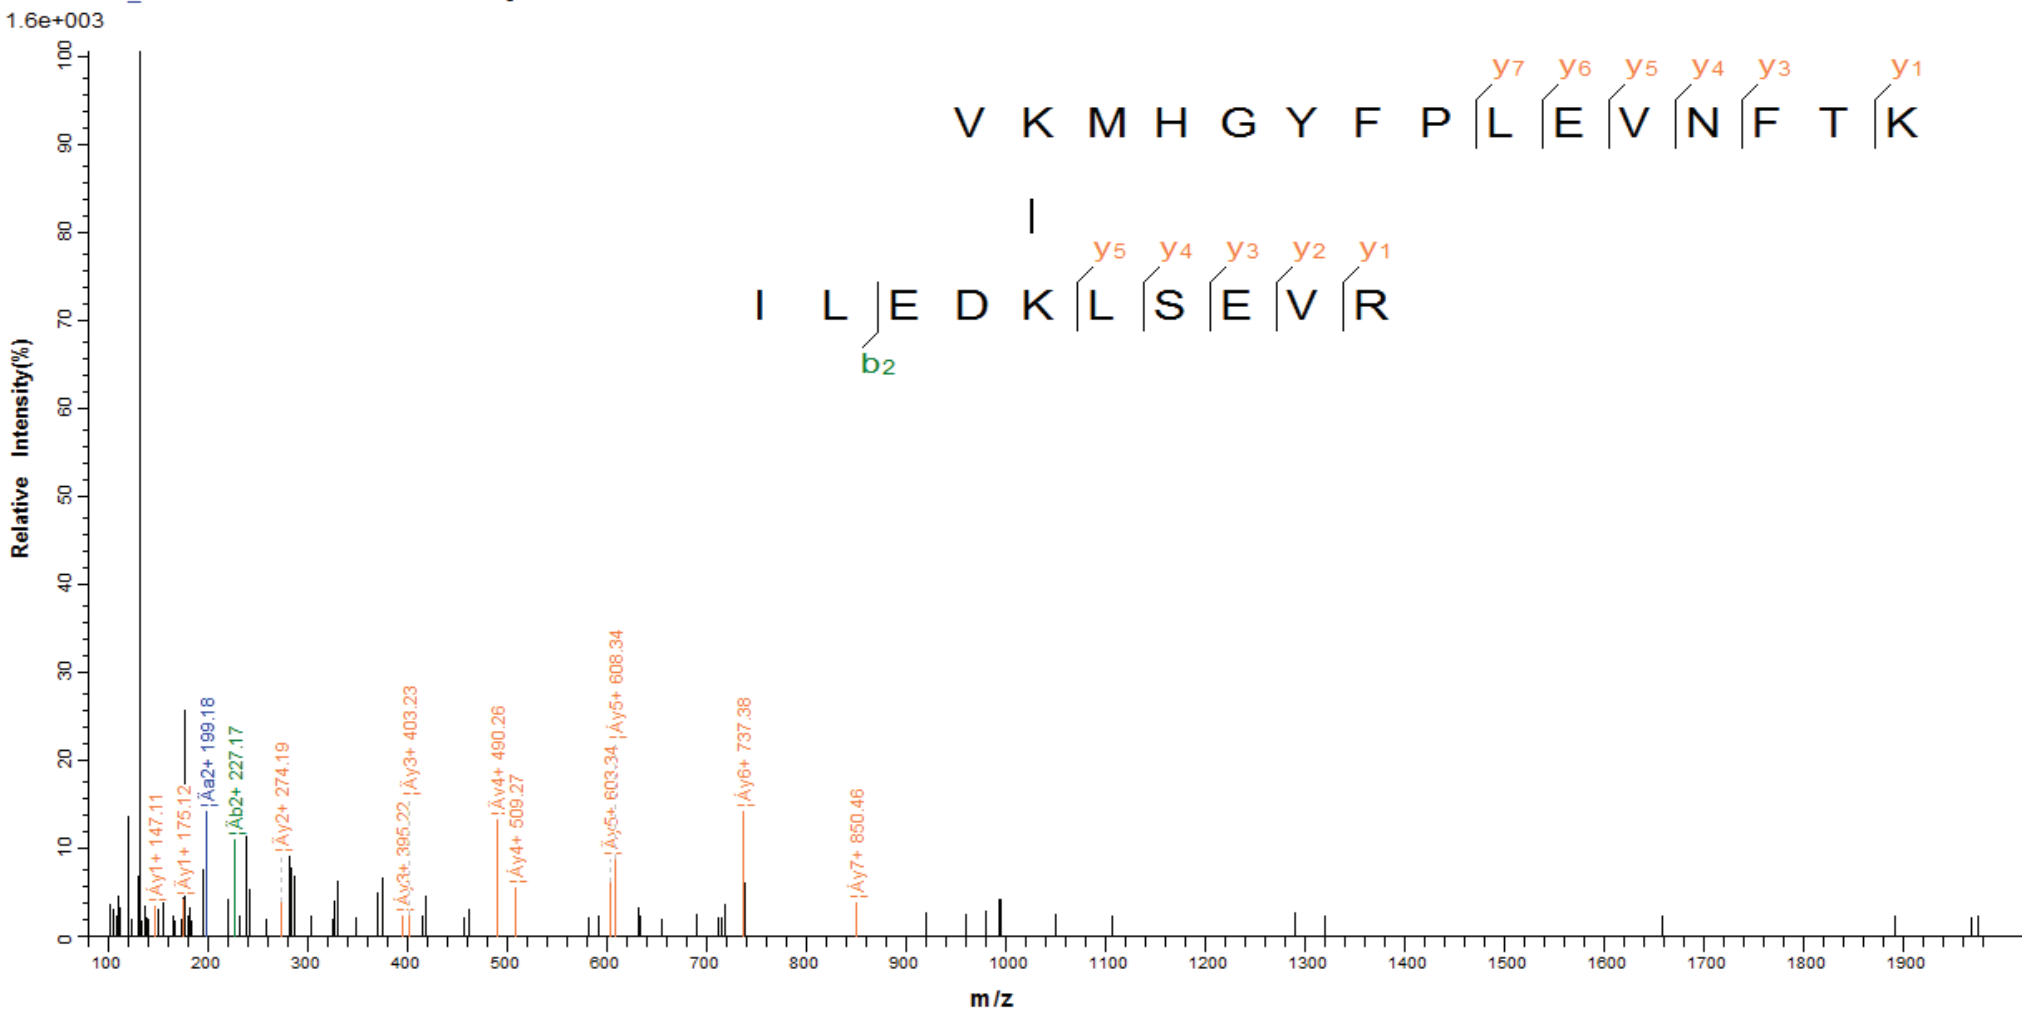

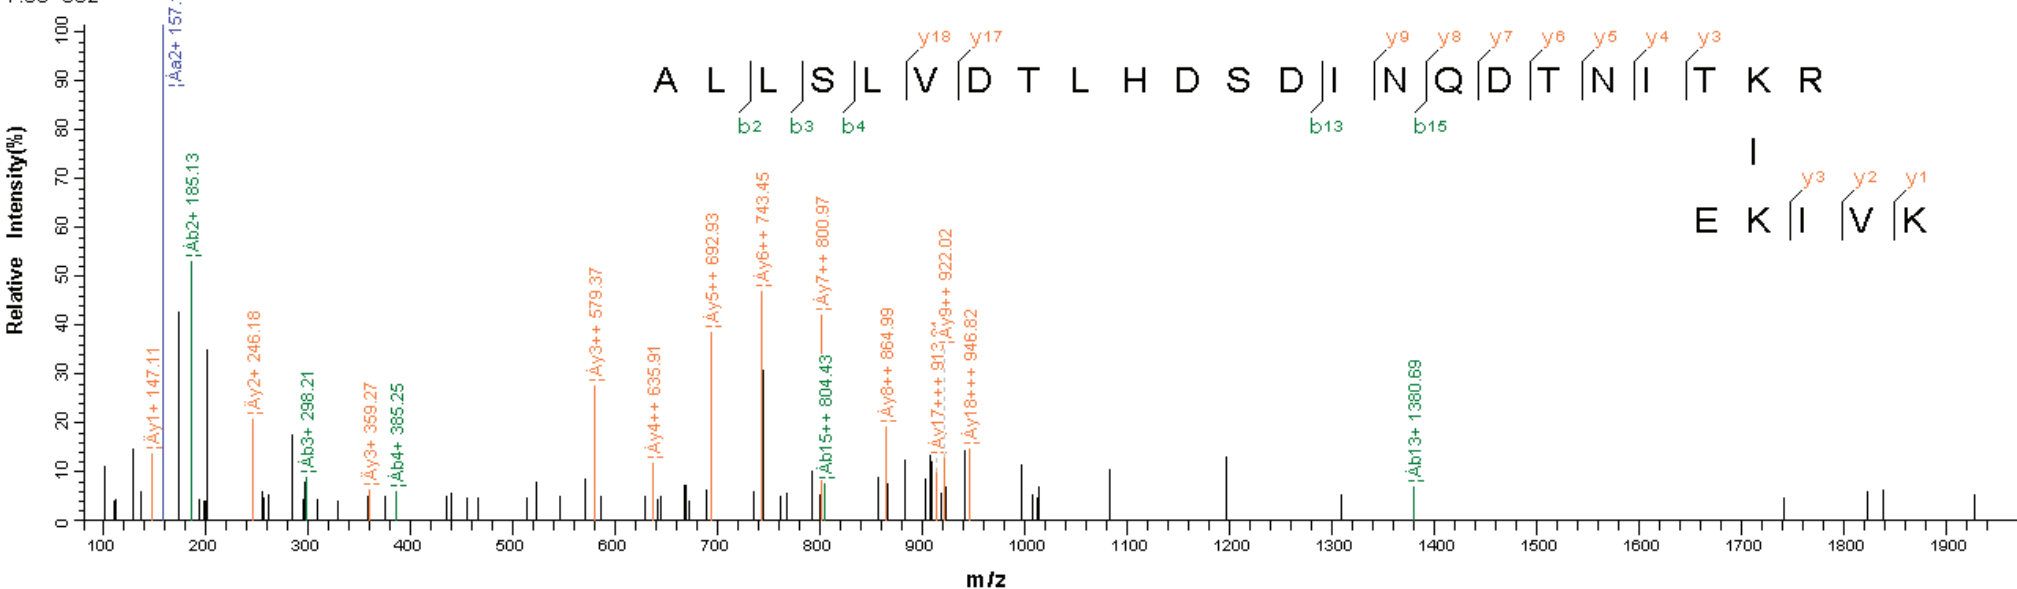

PC\_A8\_140201121226.002541.002541.5.dta Seq: ANKDGDSGNEDINQSGHQR-FKPIGINK Charge: 5

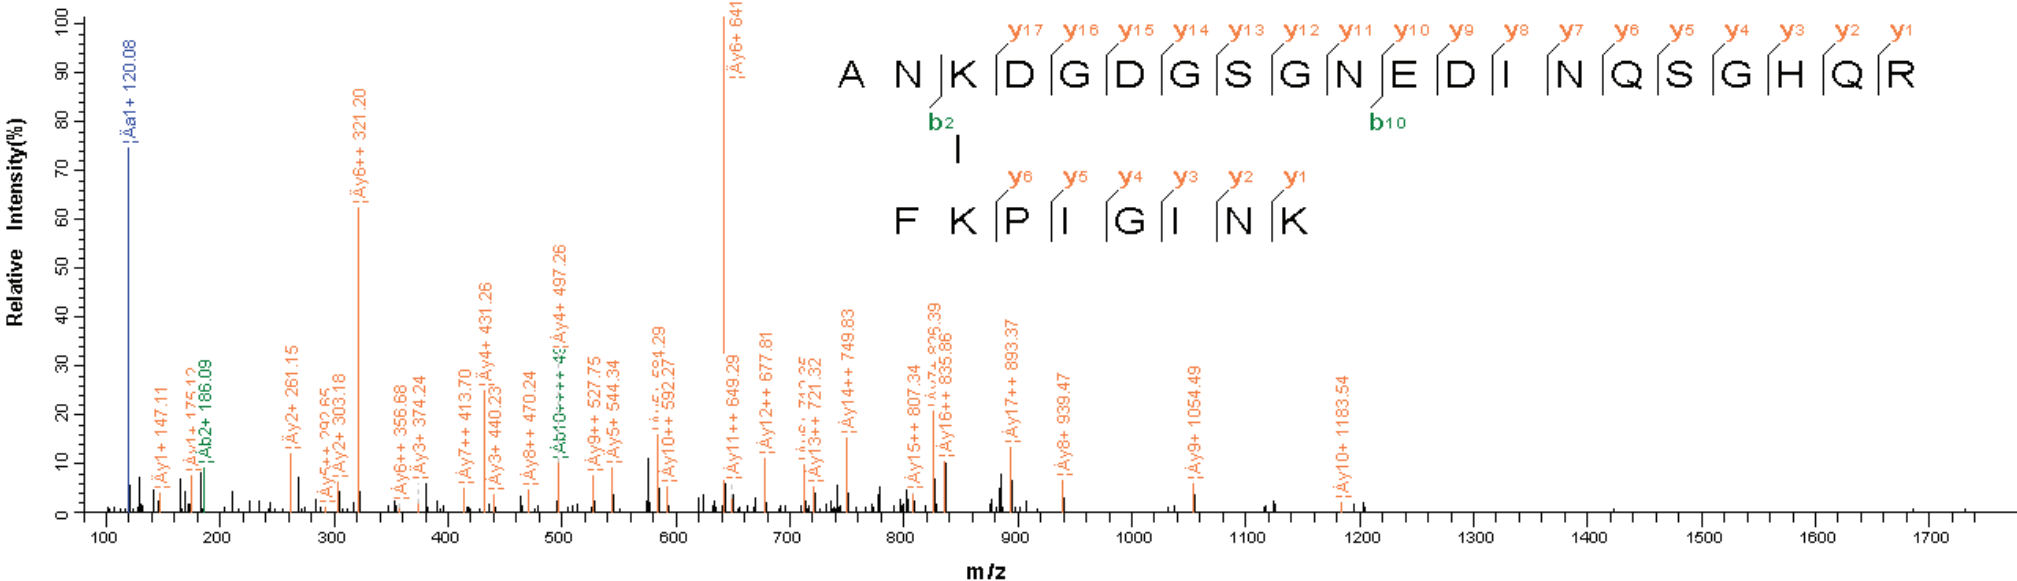

9.3e+003 PC\_A8\_140201121226.007043.007043.4.dta Seq: ETSASFMDGGYDLKPIEFDLK-NSKVLK Charge: 4

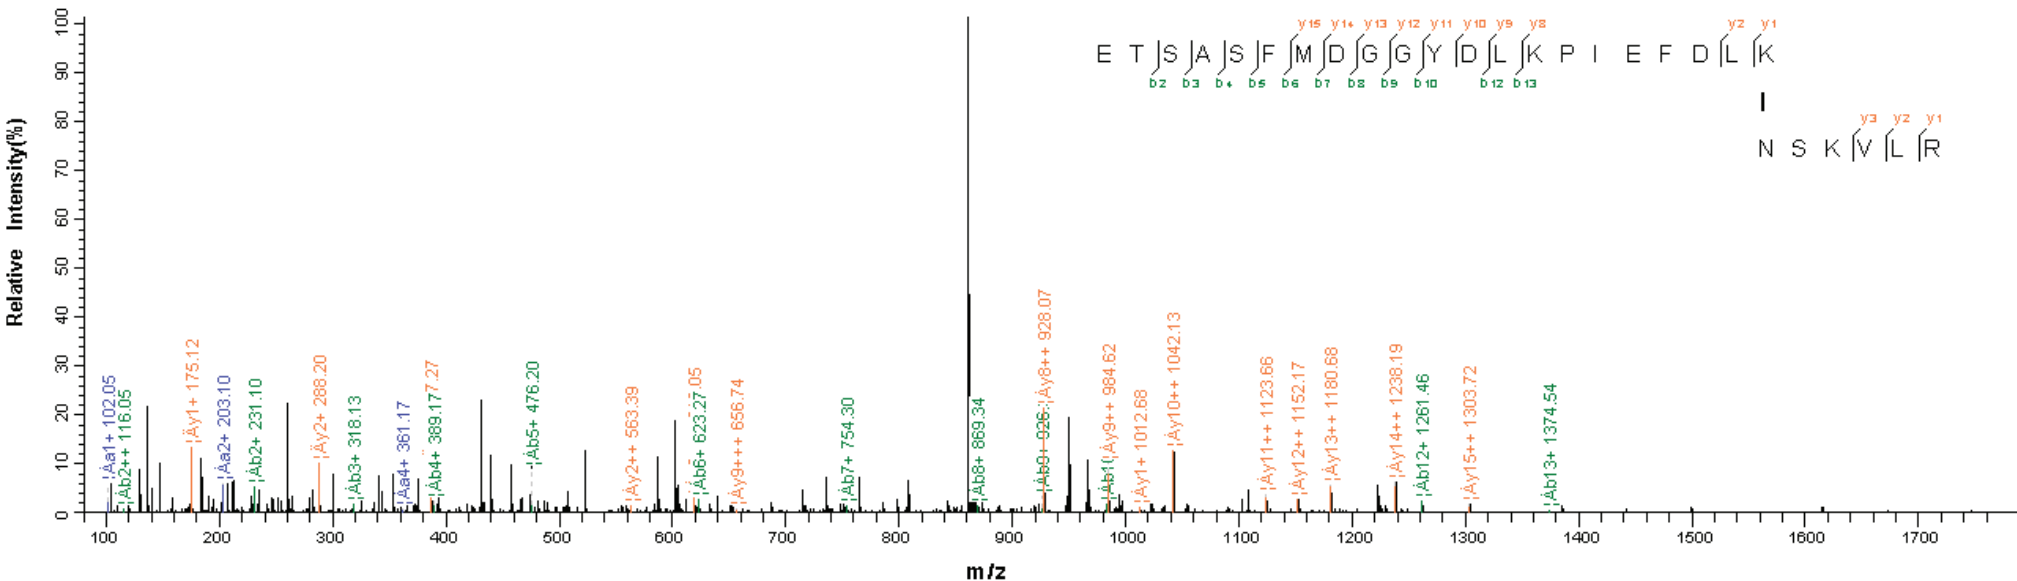

PC\_A8\_140201121226.005316.005316.5.dta Seq: KKTDELLESLSVEEDR-VKYLVK Charge: 5

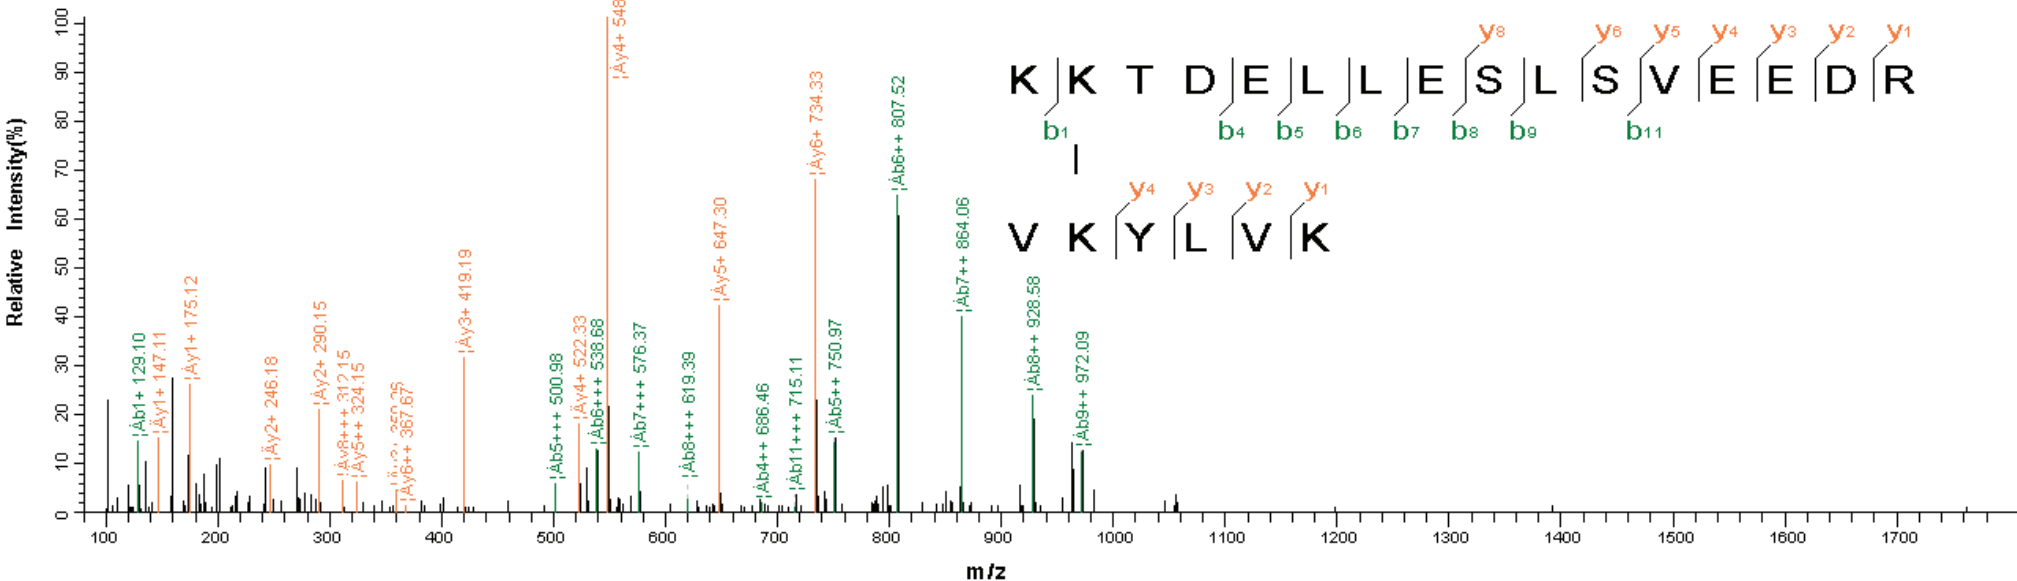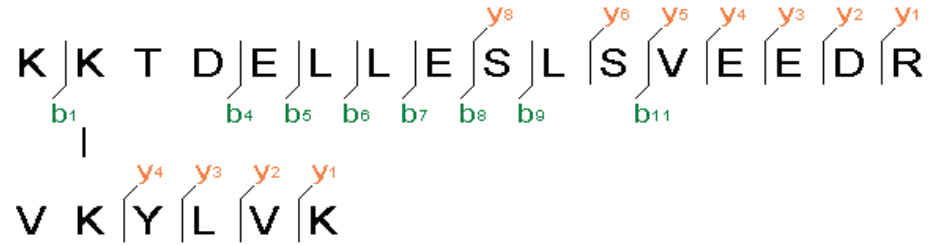



1.3e+004 PC\_A8\_140201121226.007395.007395.4.dta Seq: QNSLPSLQKLFPPYETSFTK-ITSPSKNISEELTK Charge: 4

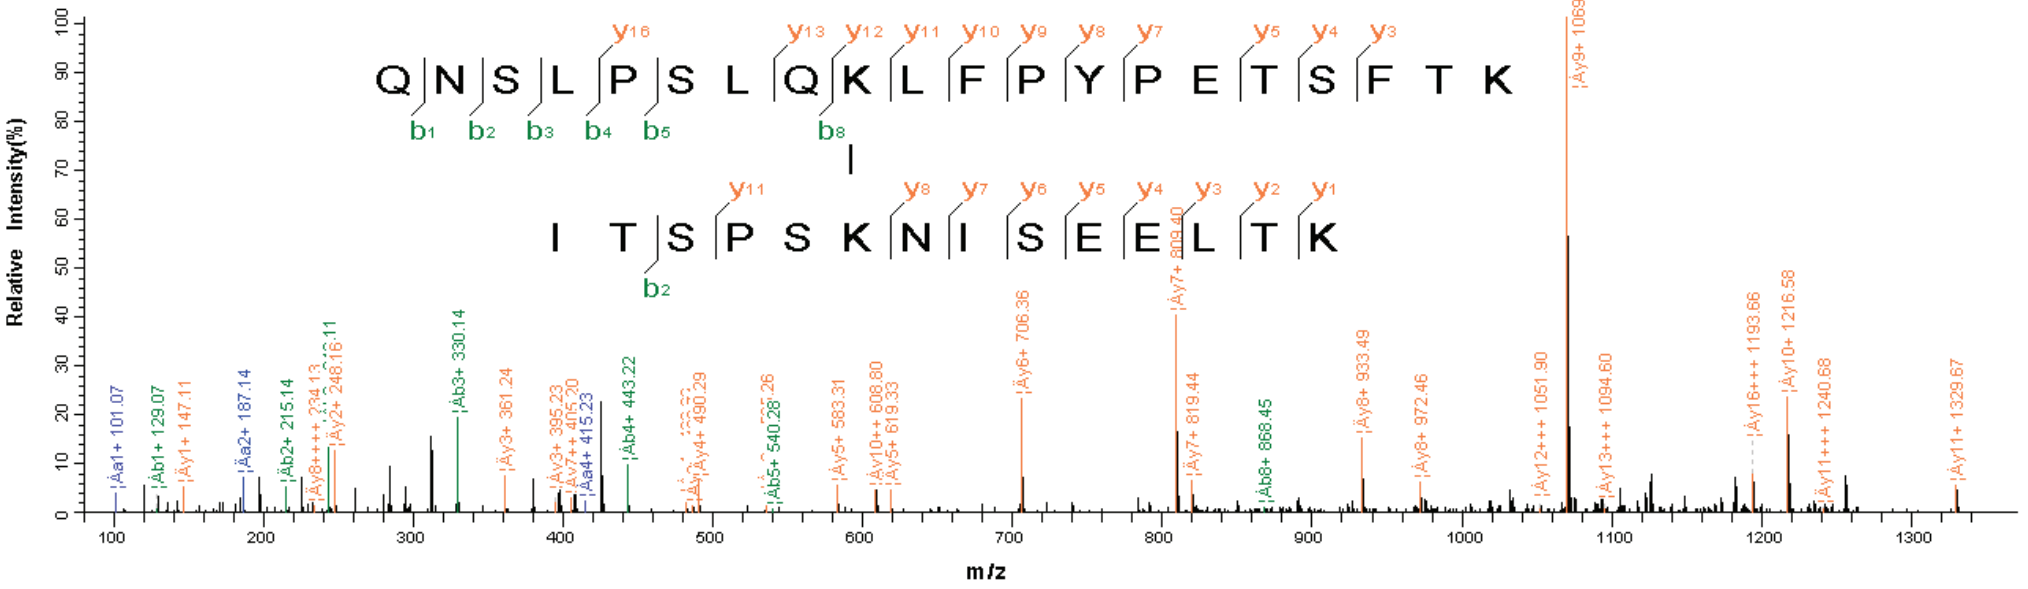



PC\_A8\_140201121226.005636.005636.6.dta Seq: VLDHLAPSELIKPVK-SCHNKPSVLVDDR Mod: 20,C\_57

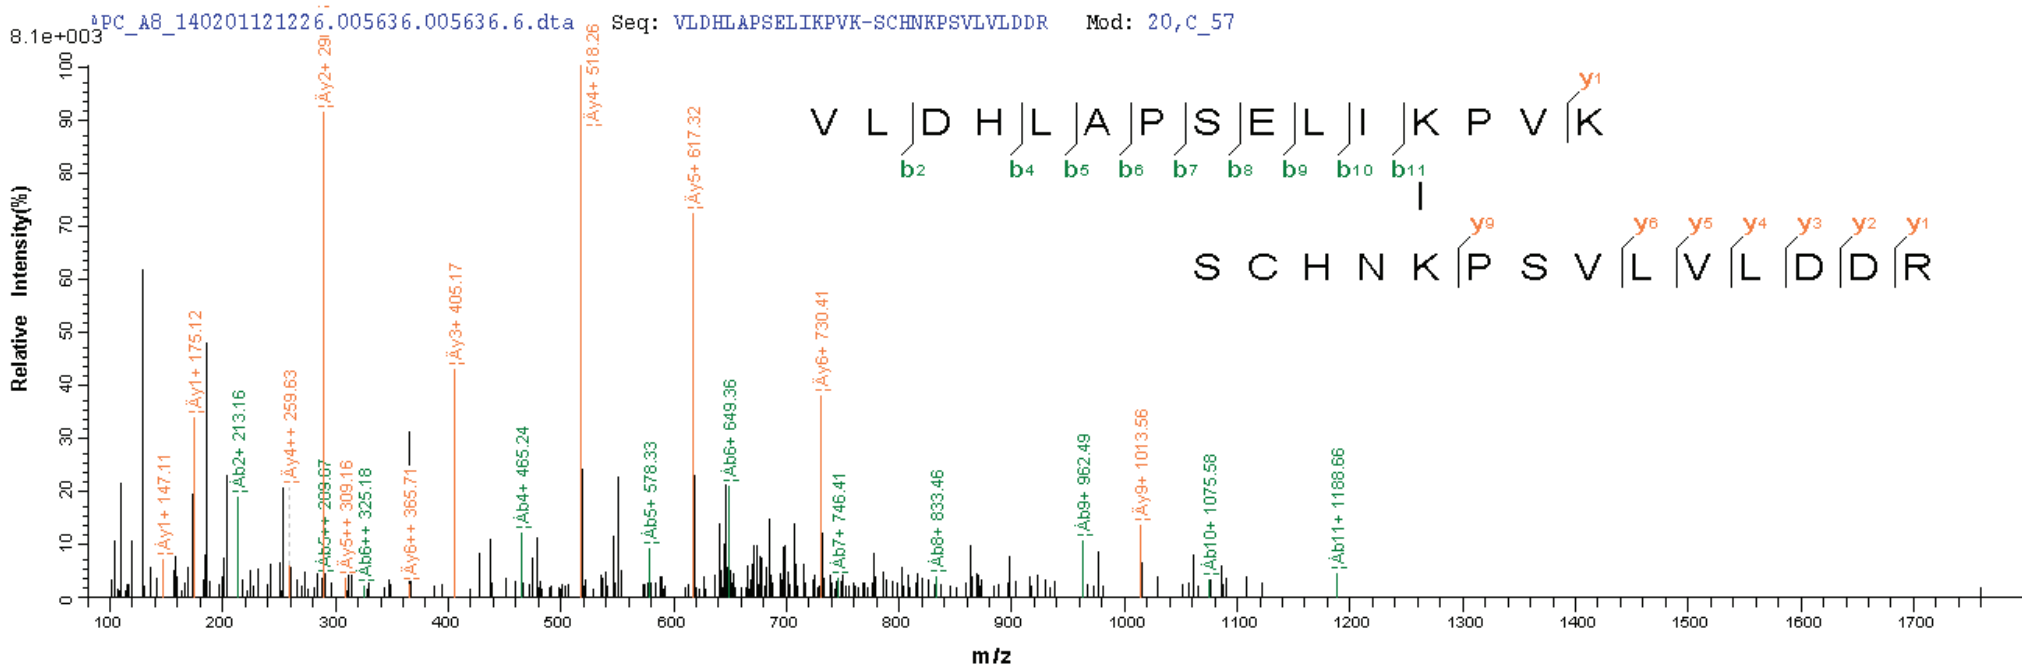

PC\_A8\_140201121226.005881.005881.5.dta Seq: ALLSLVDTLHDSINQDTNITKR-KIMK

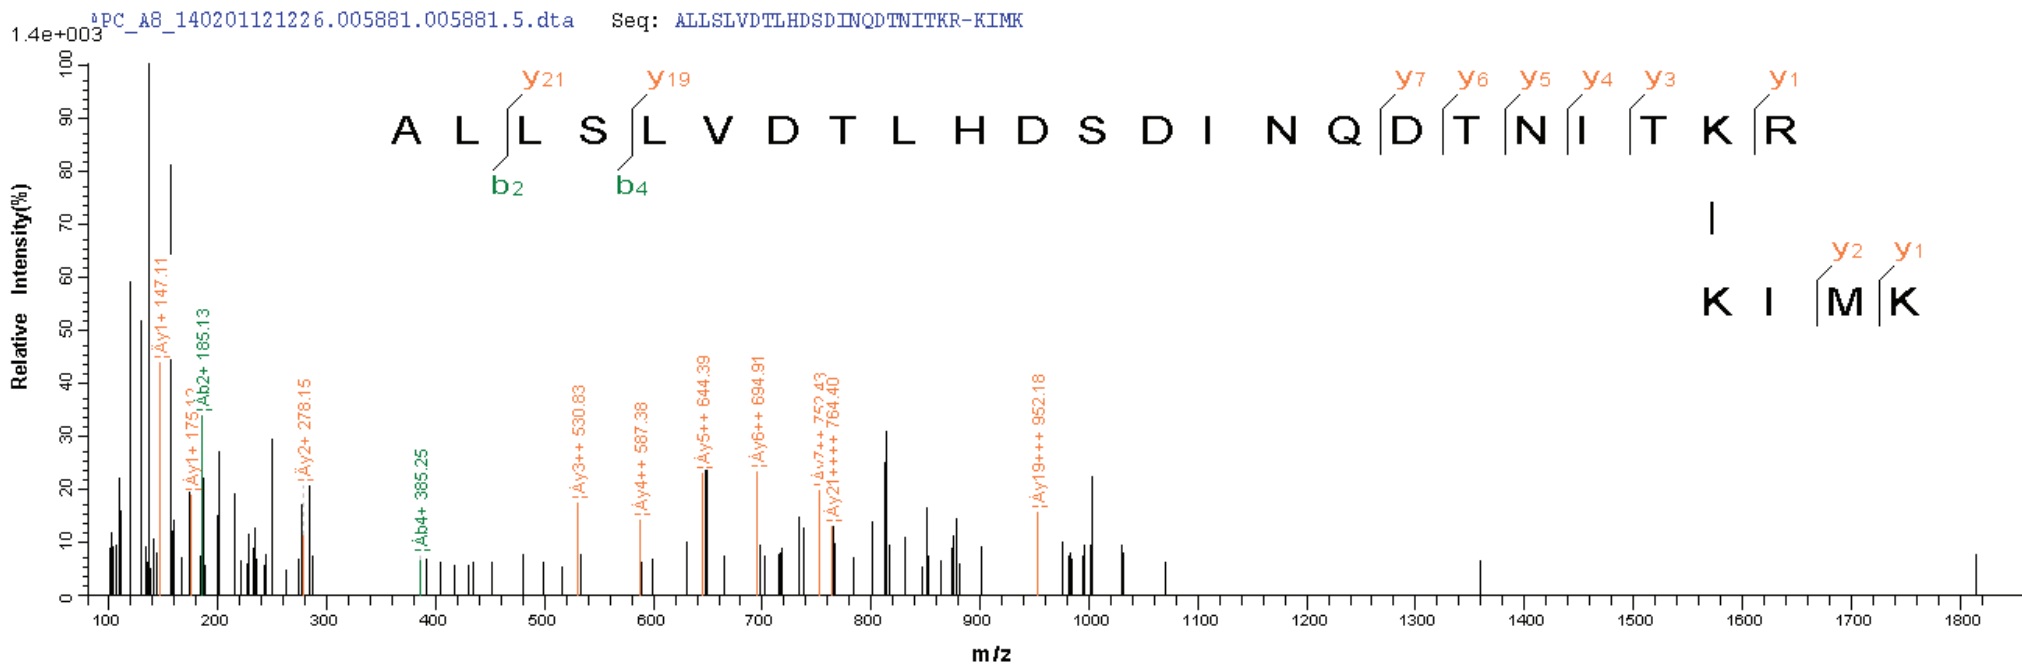

APC\_A9\_140131205754.003785.003785.5.dta

Seq: TGLDAAGNSQKSFSLTR

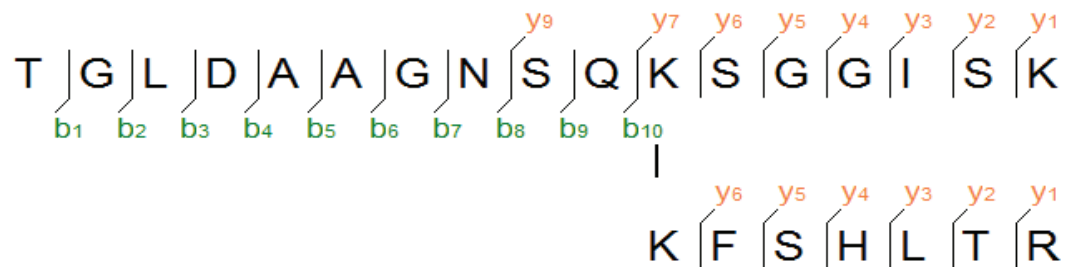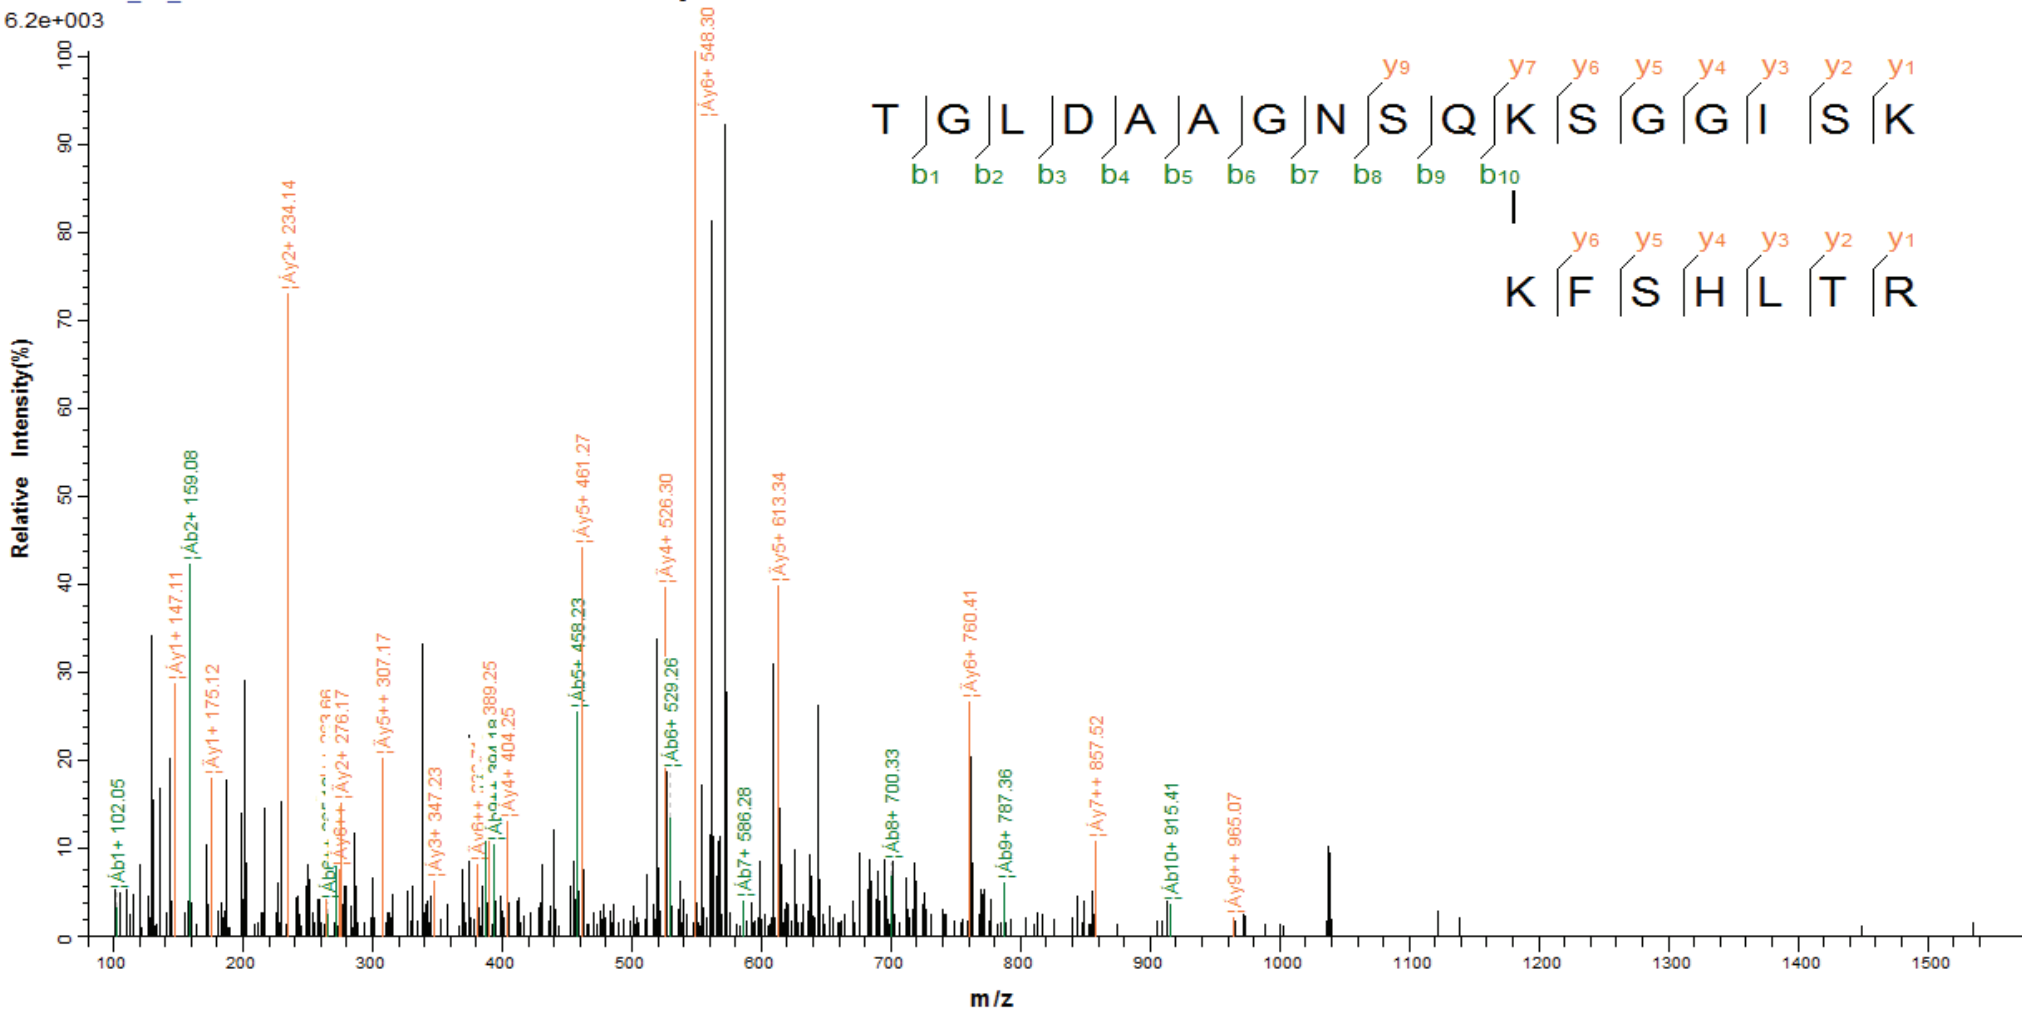

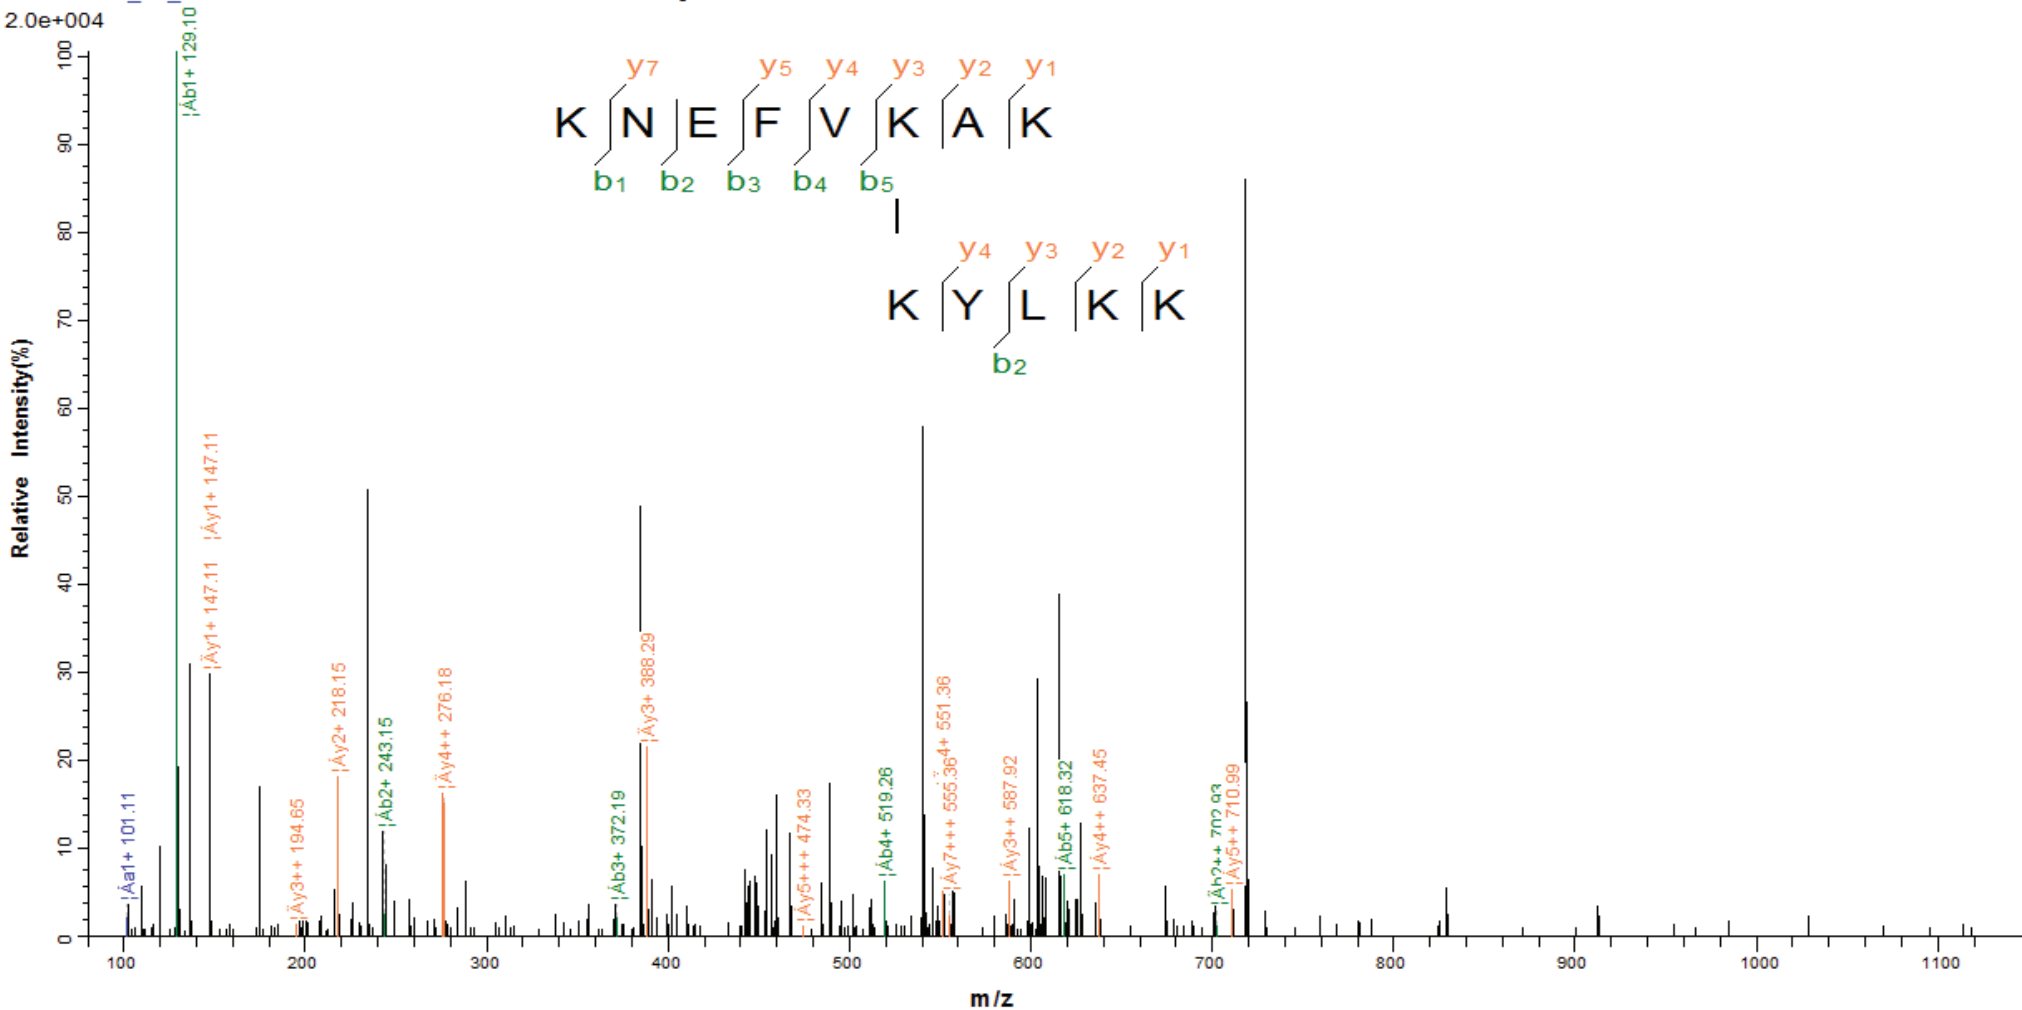

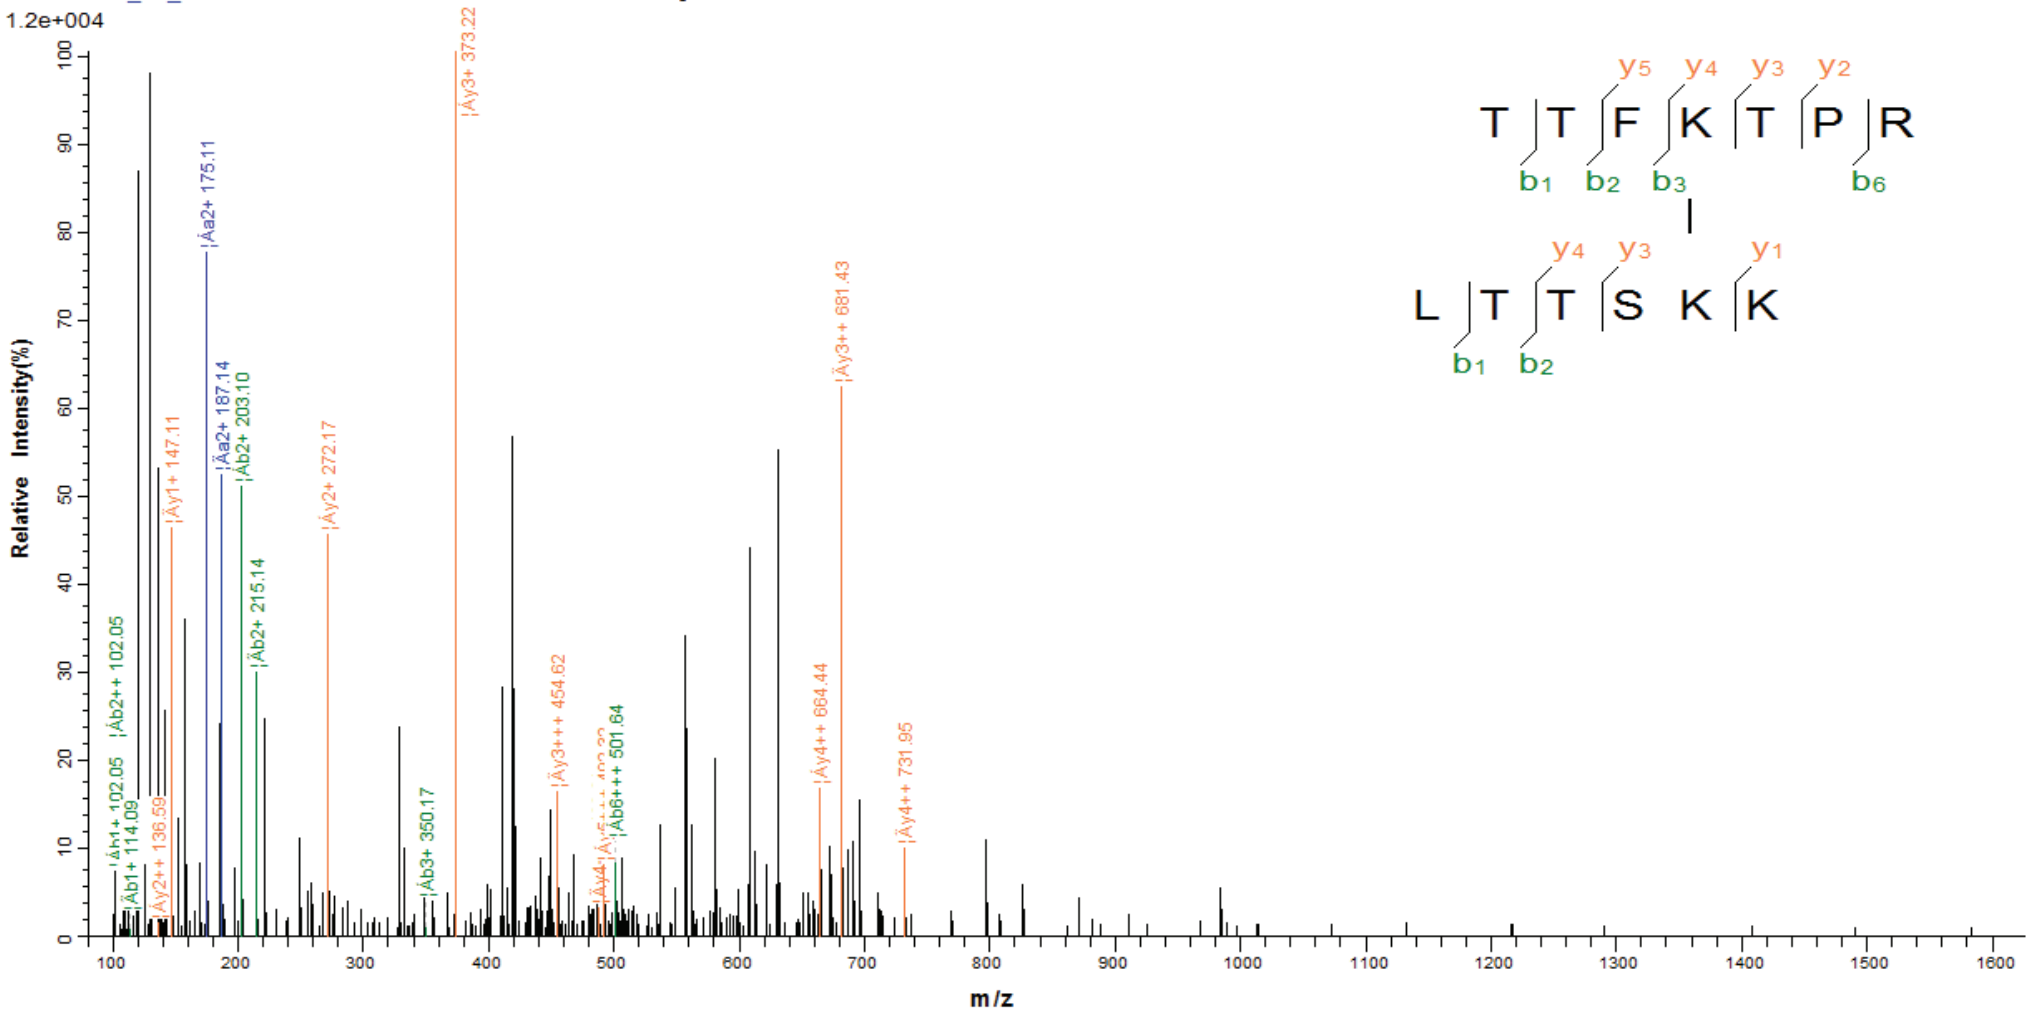

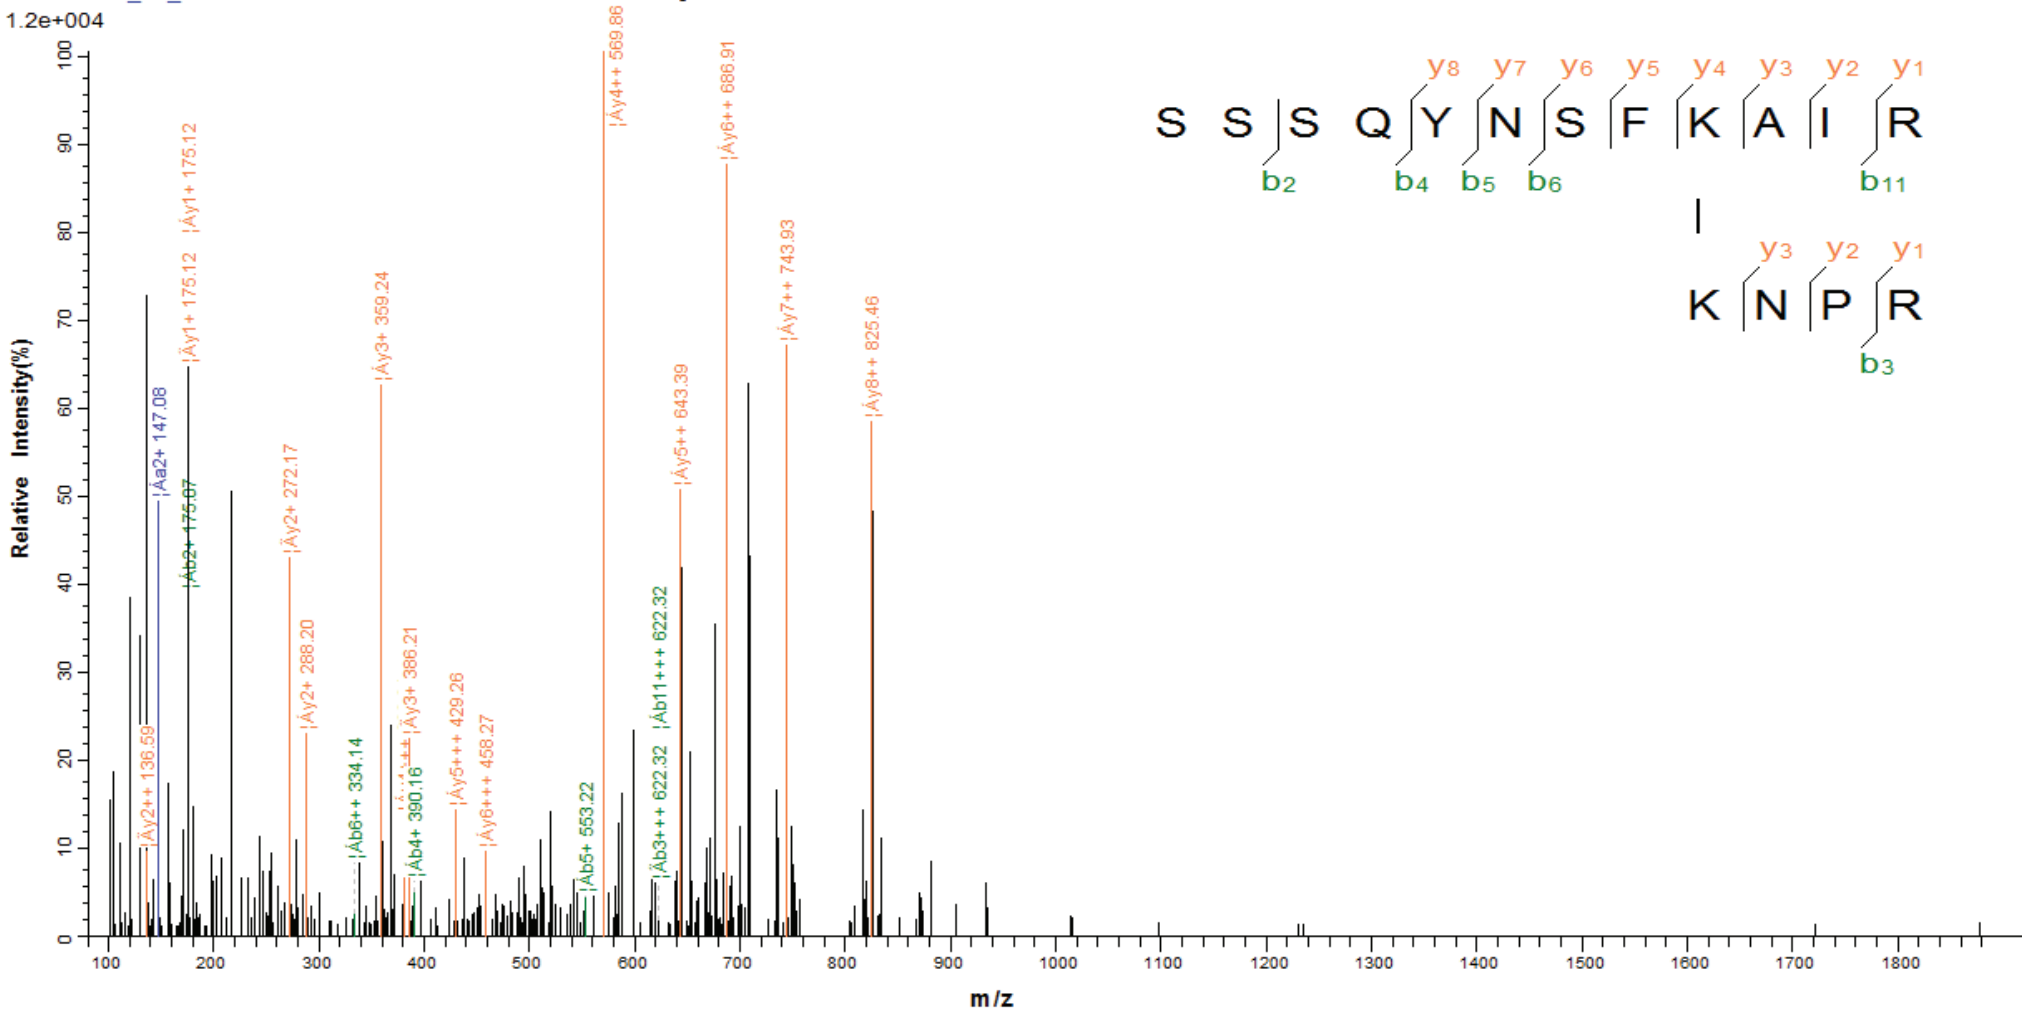



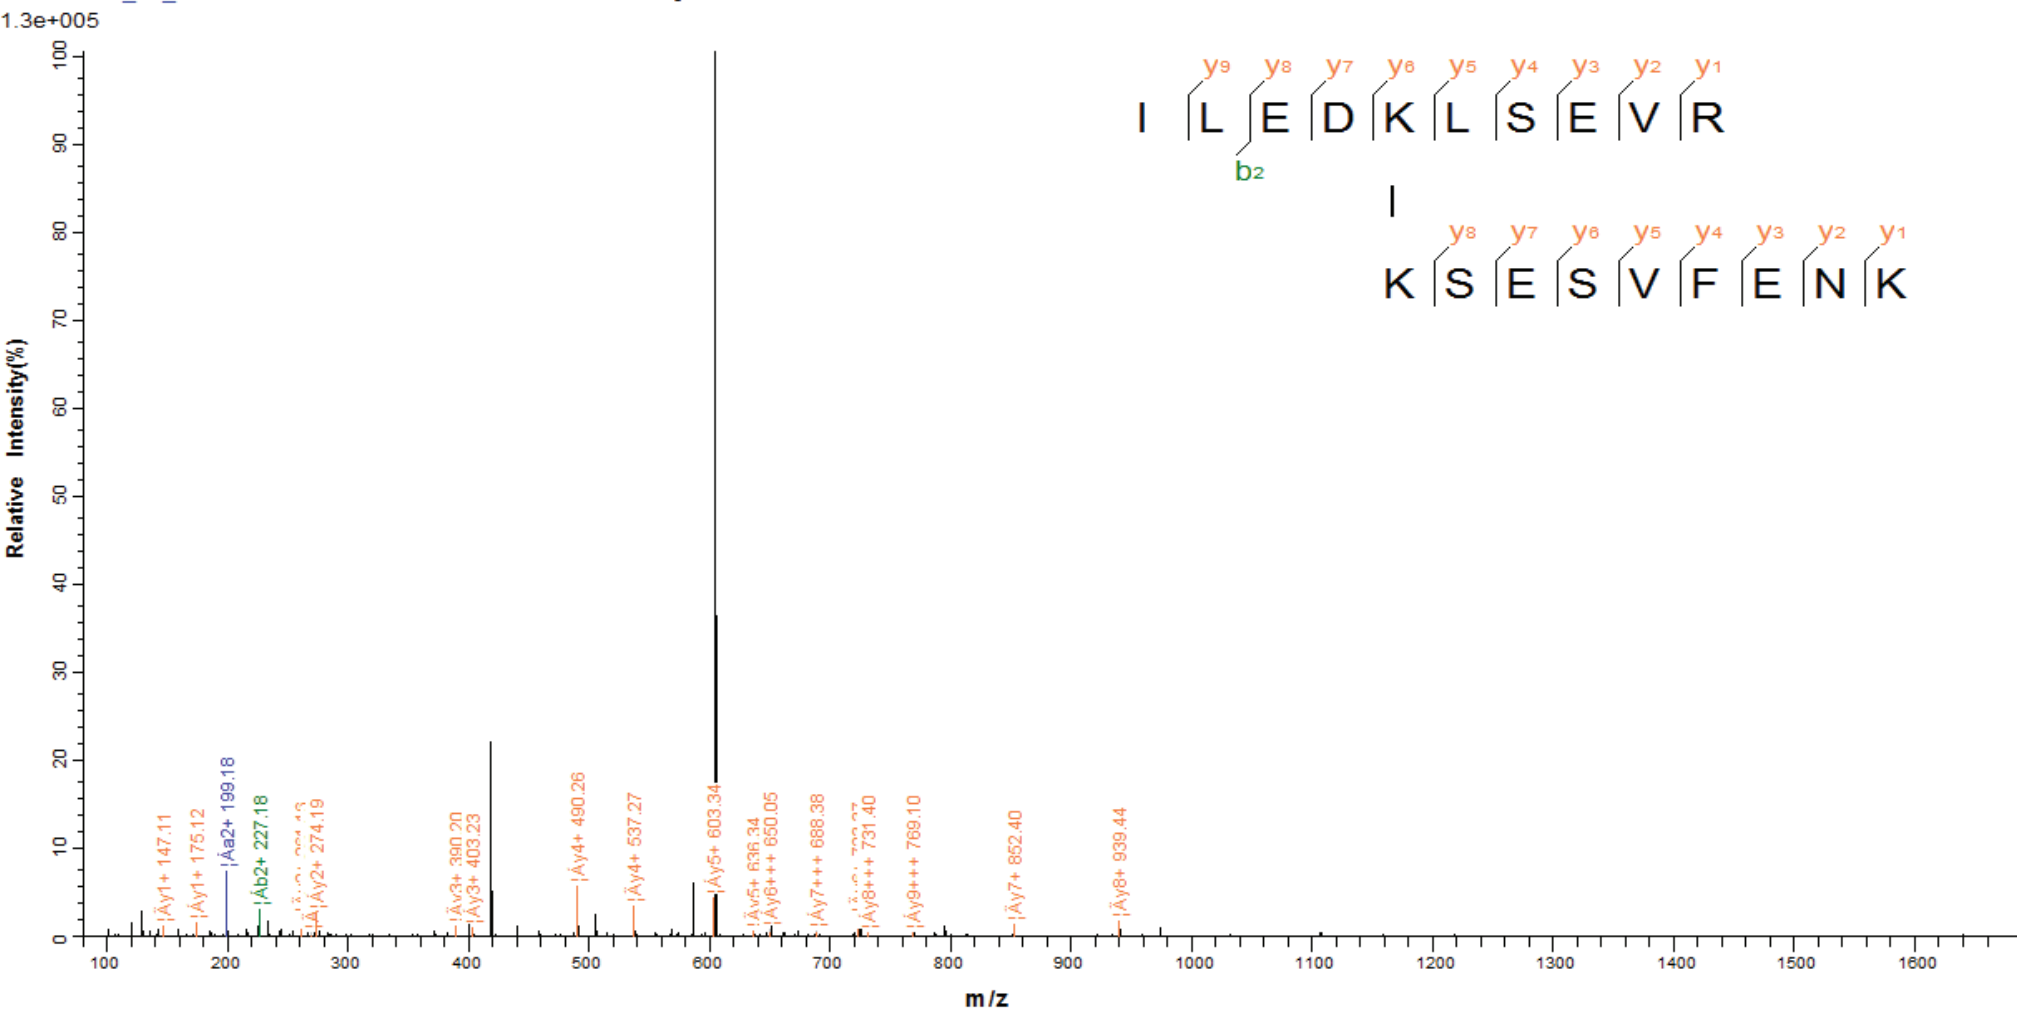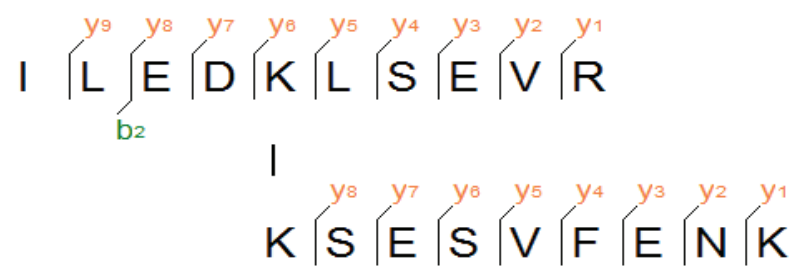

APC\_A9\_140131205754.002950.002950.6.dta Seq: TQKEIFDQNNKALR-KGGHDSK

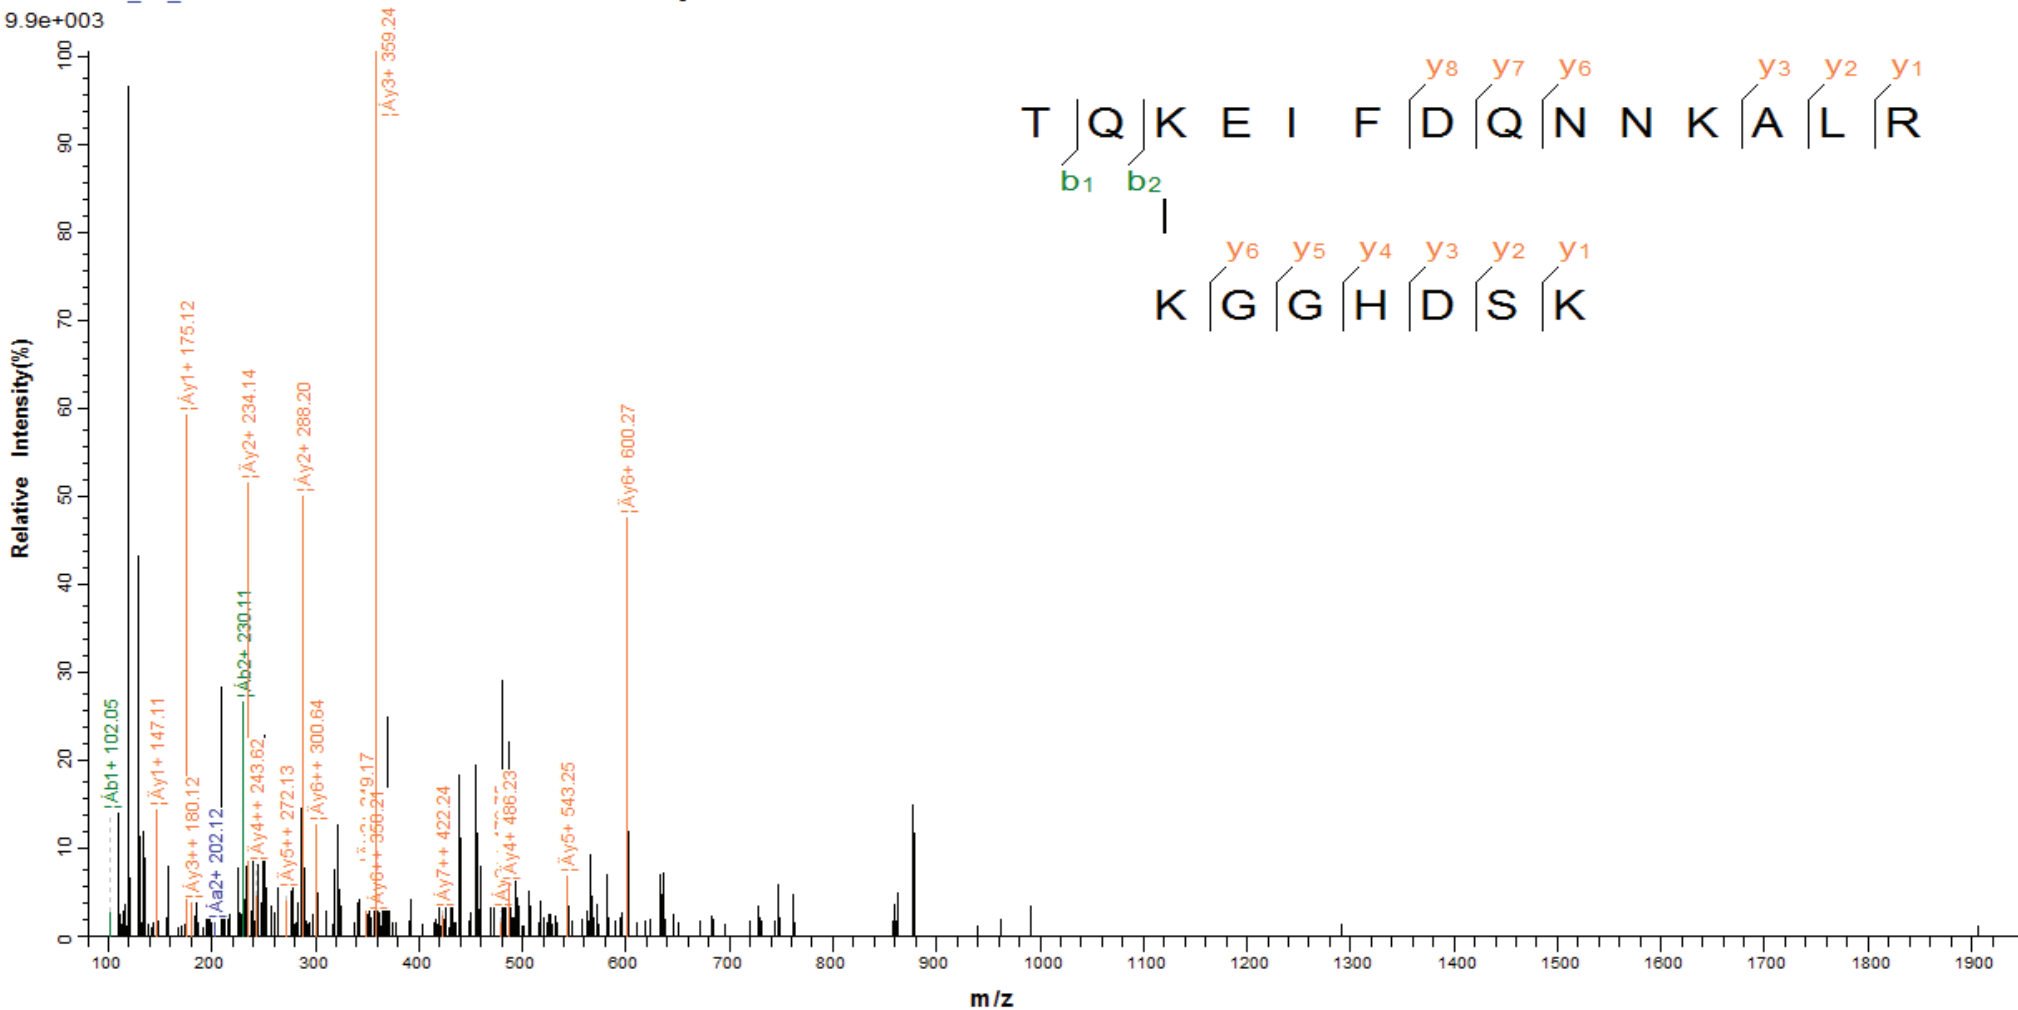

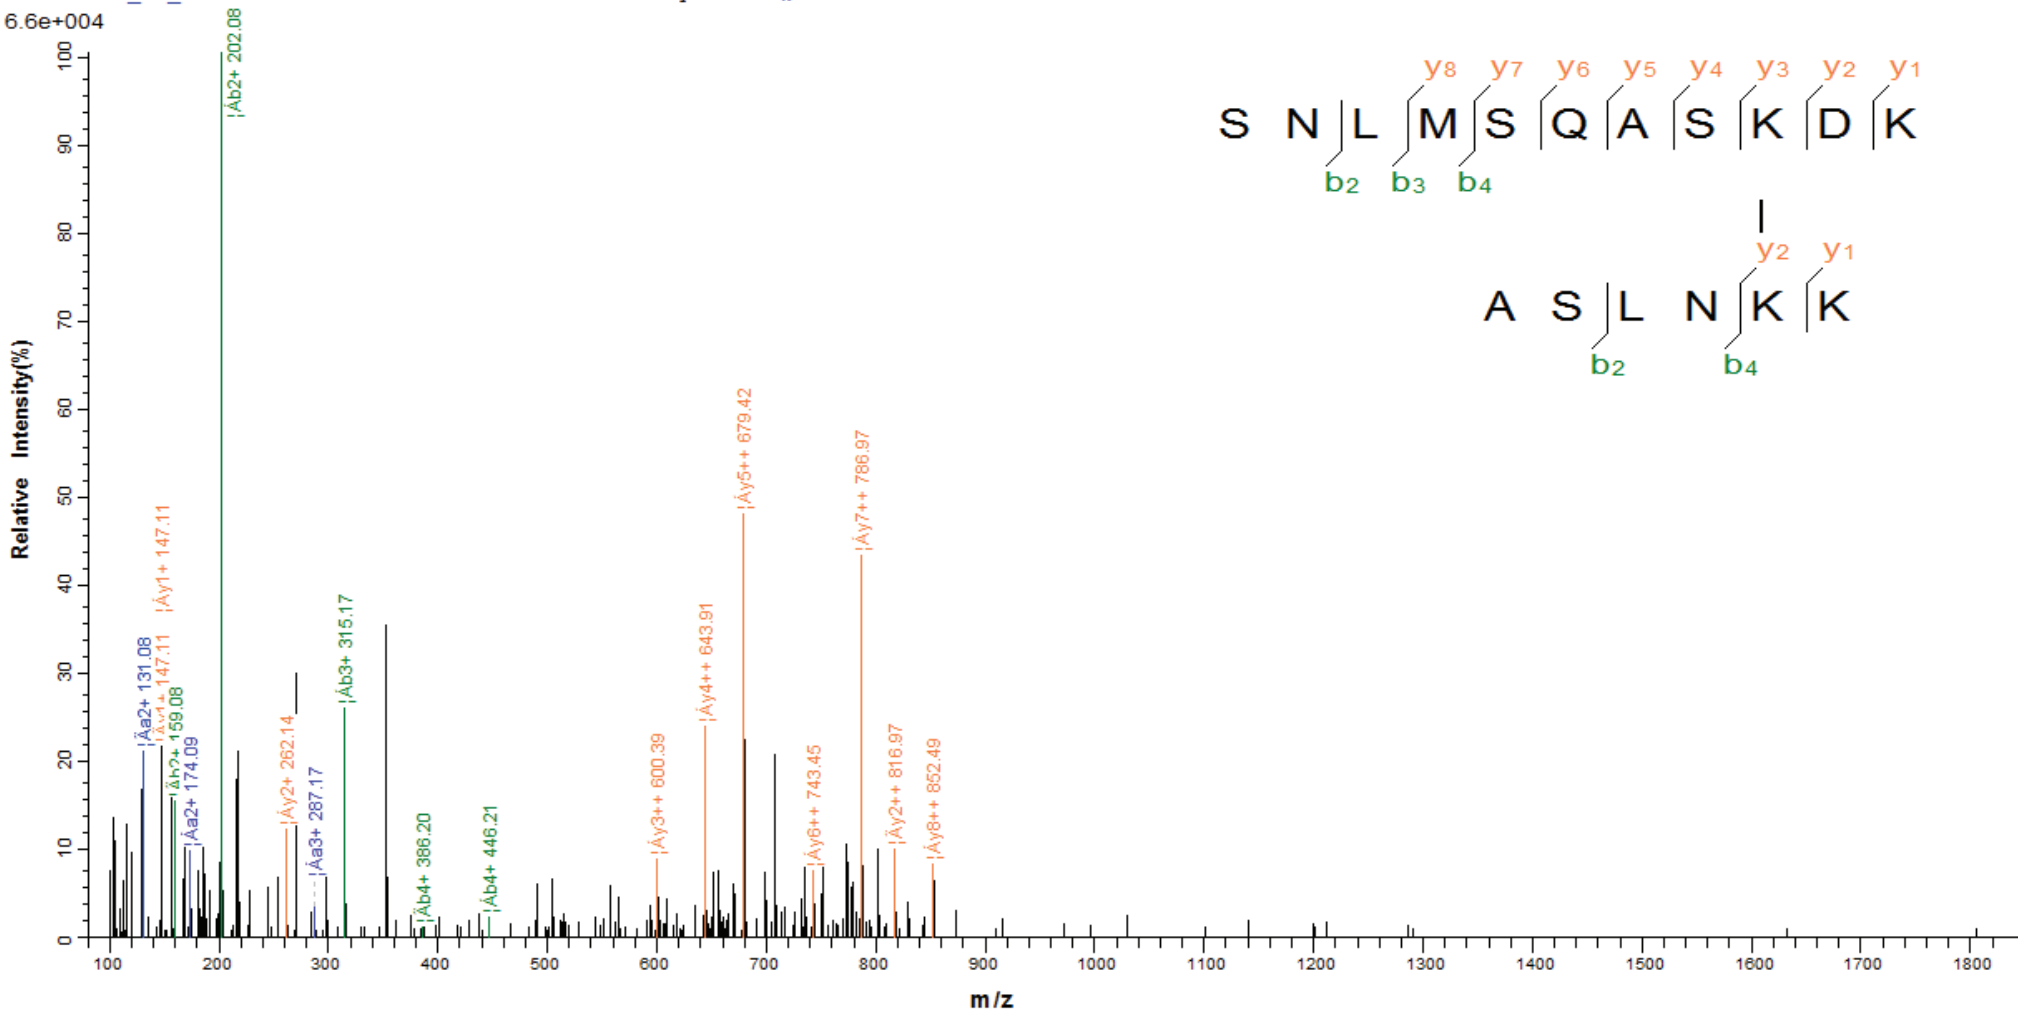

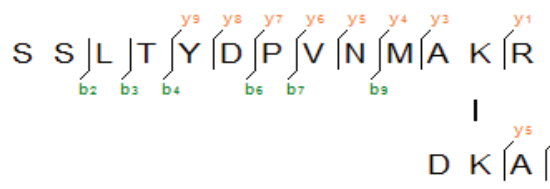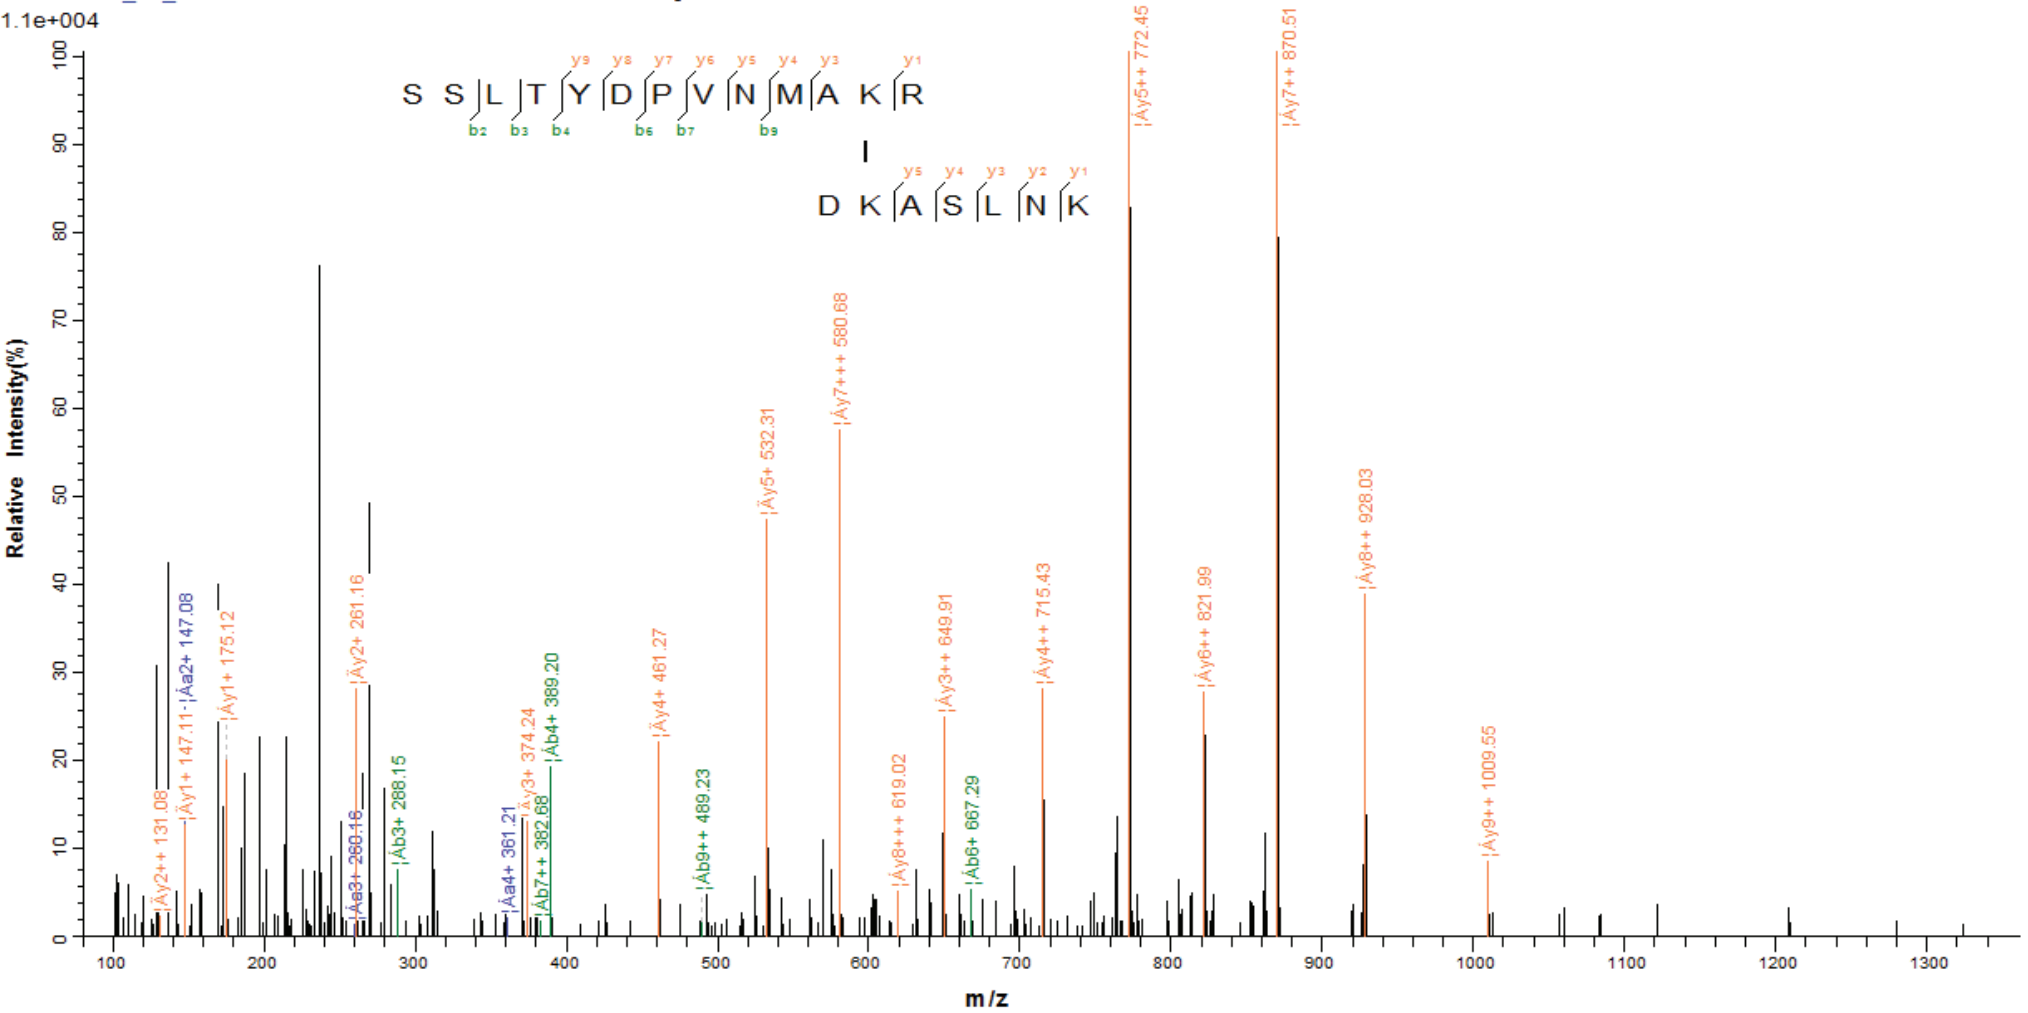

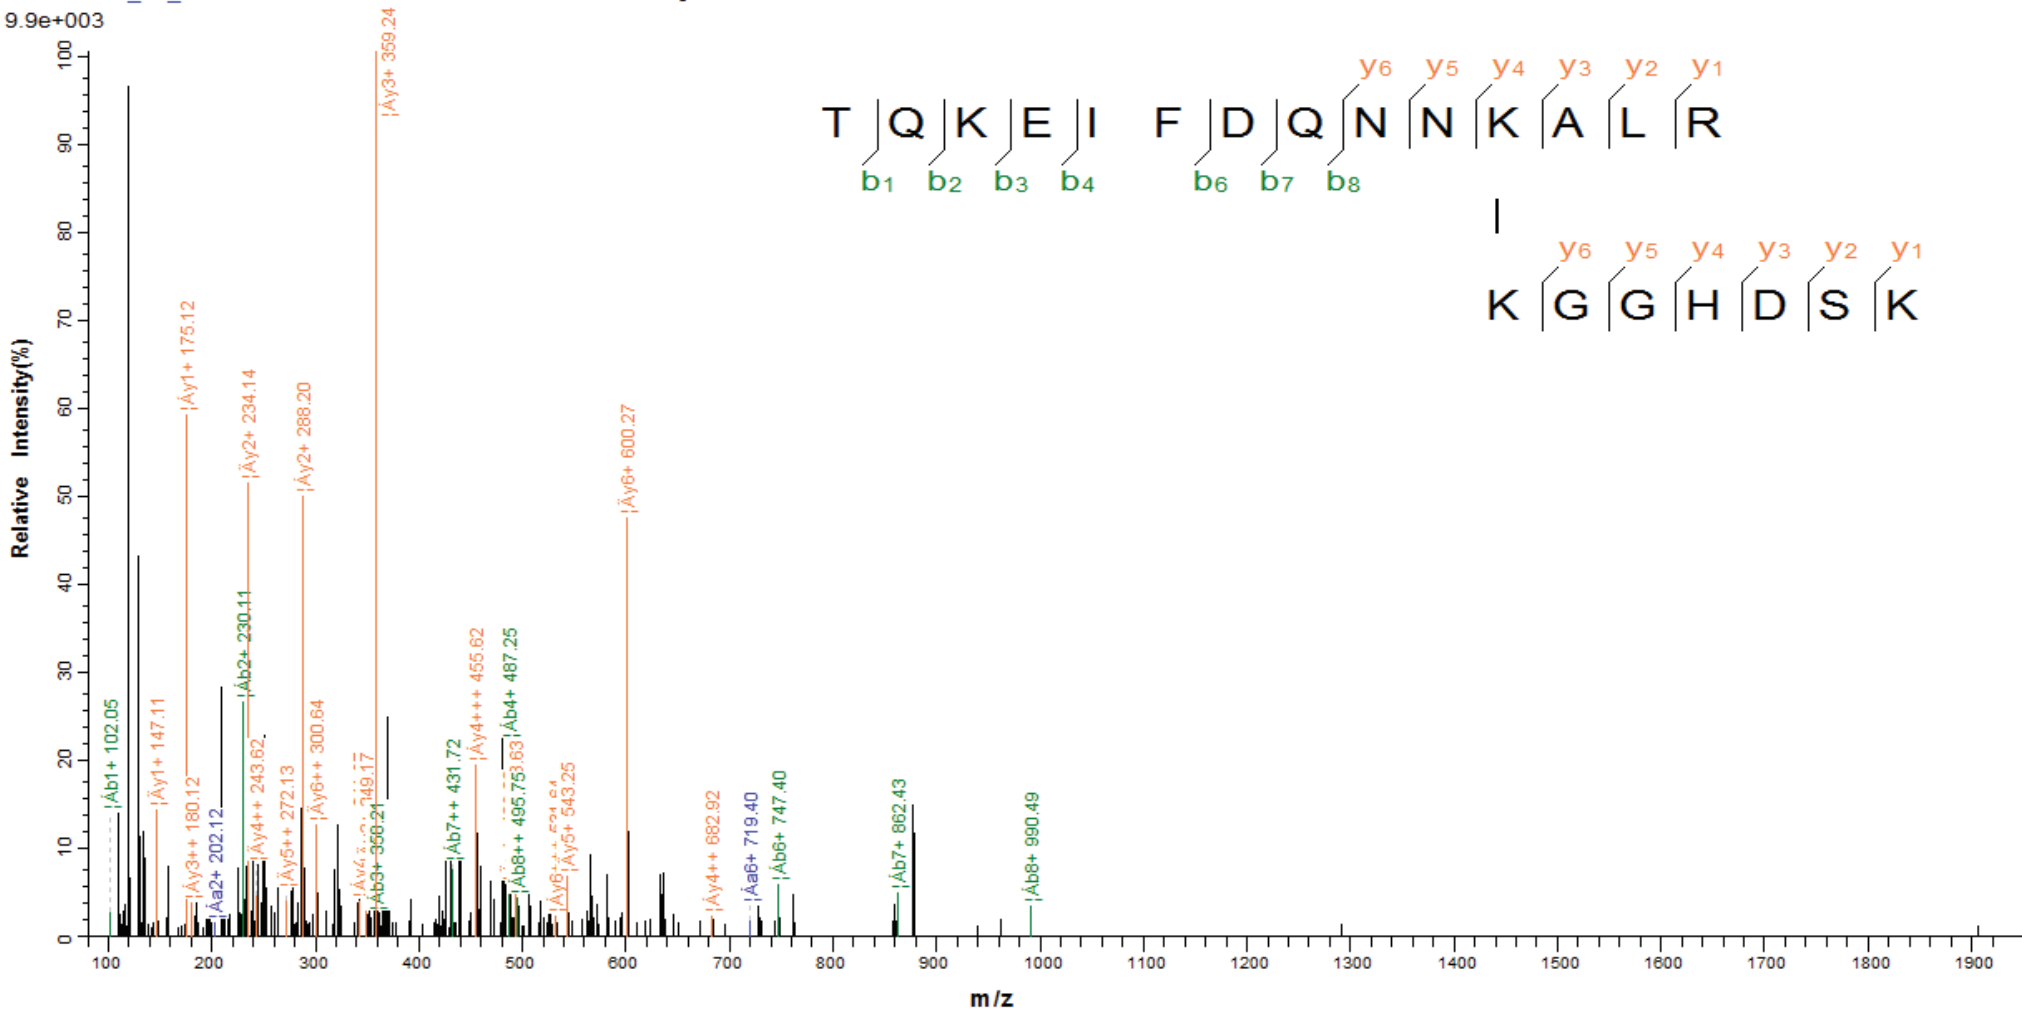

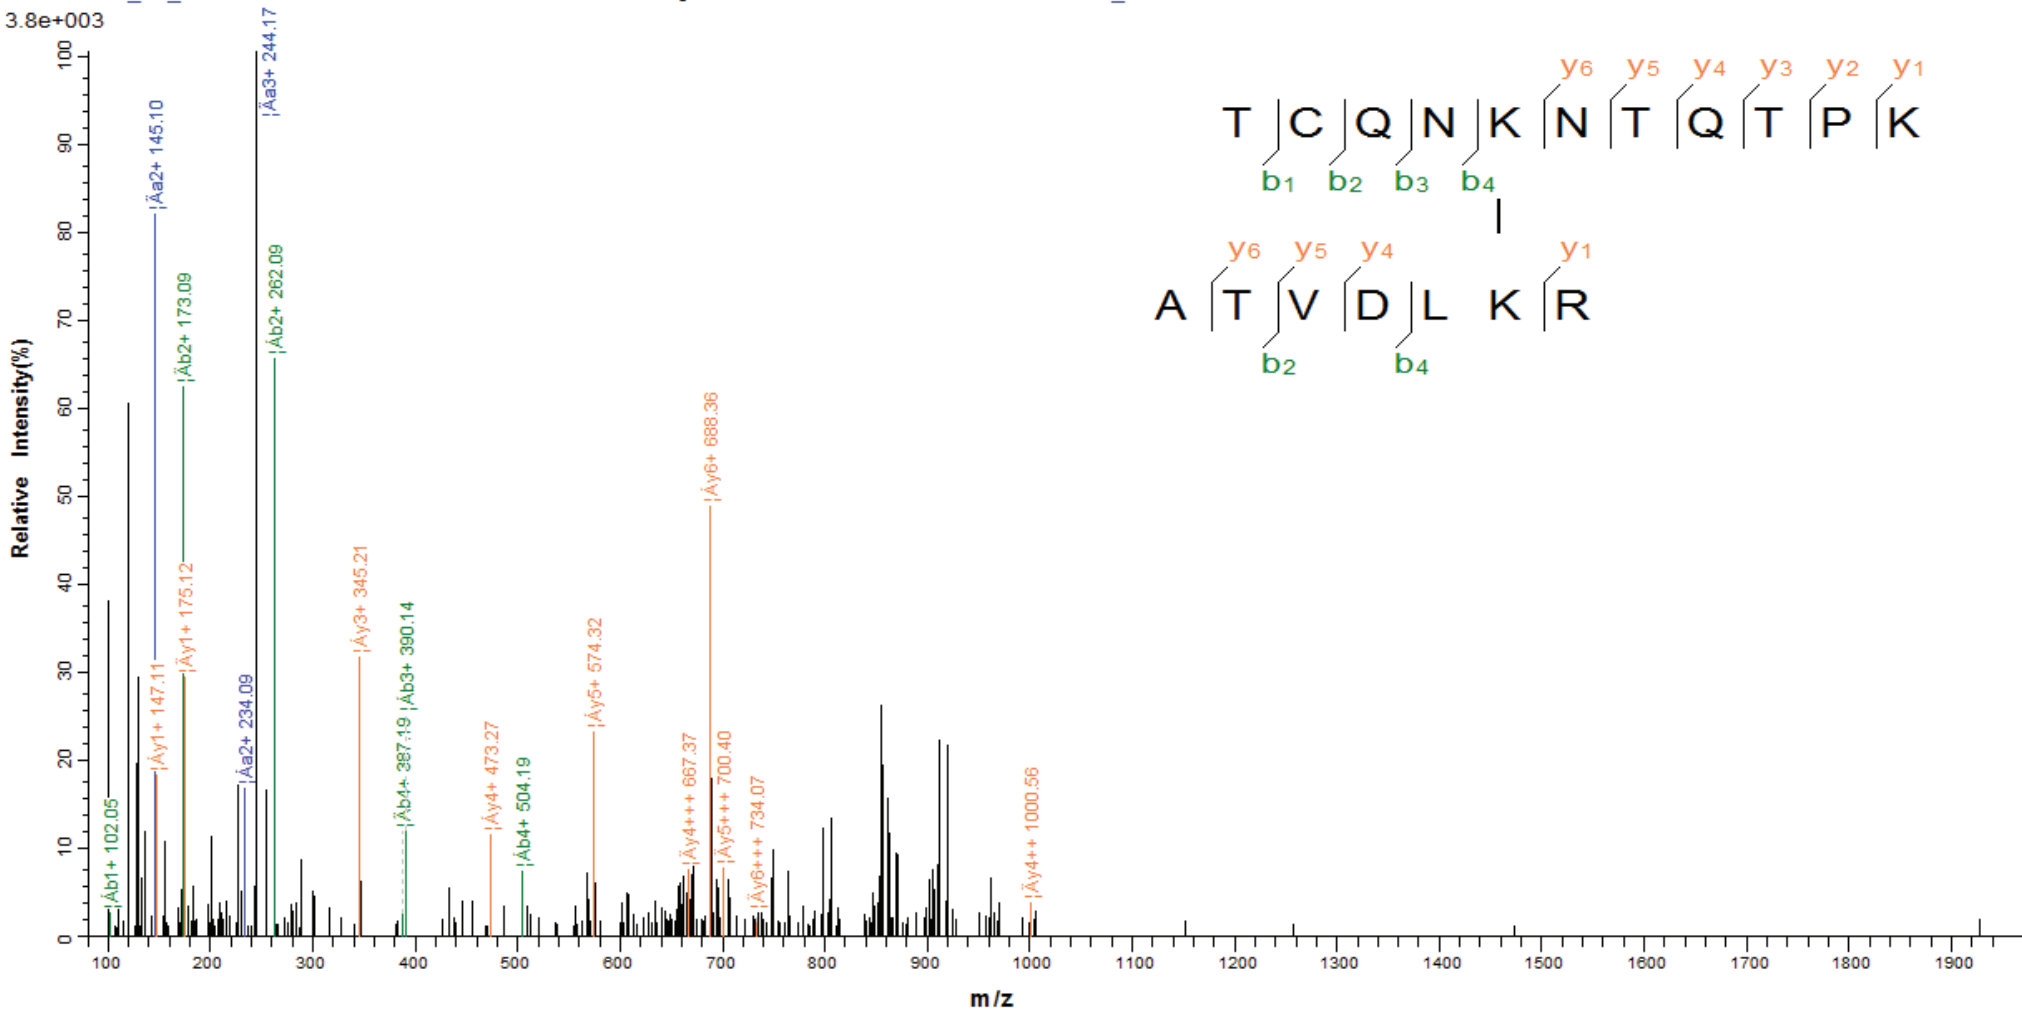

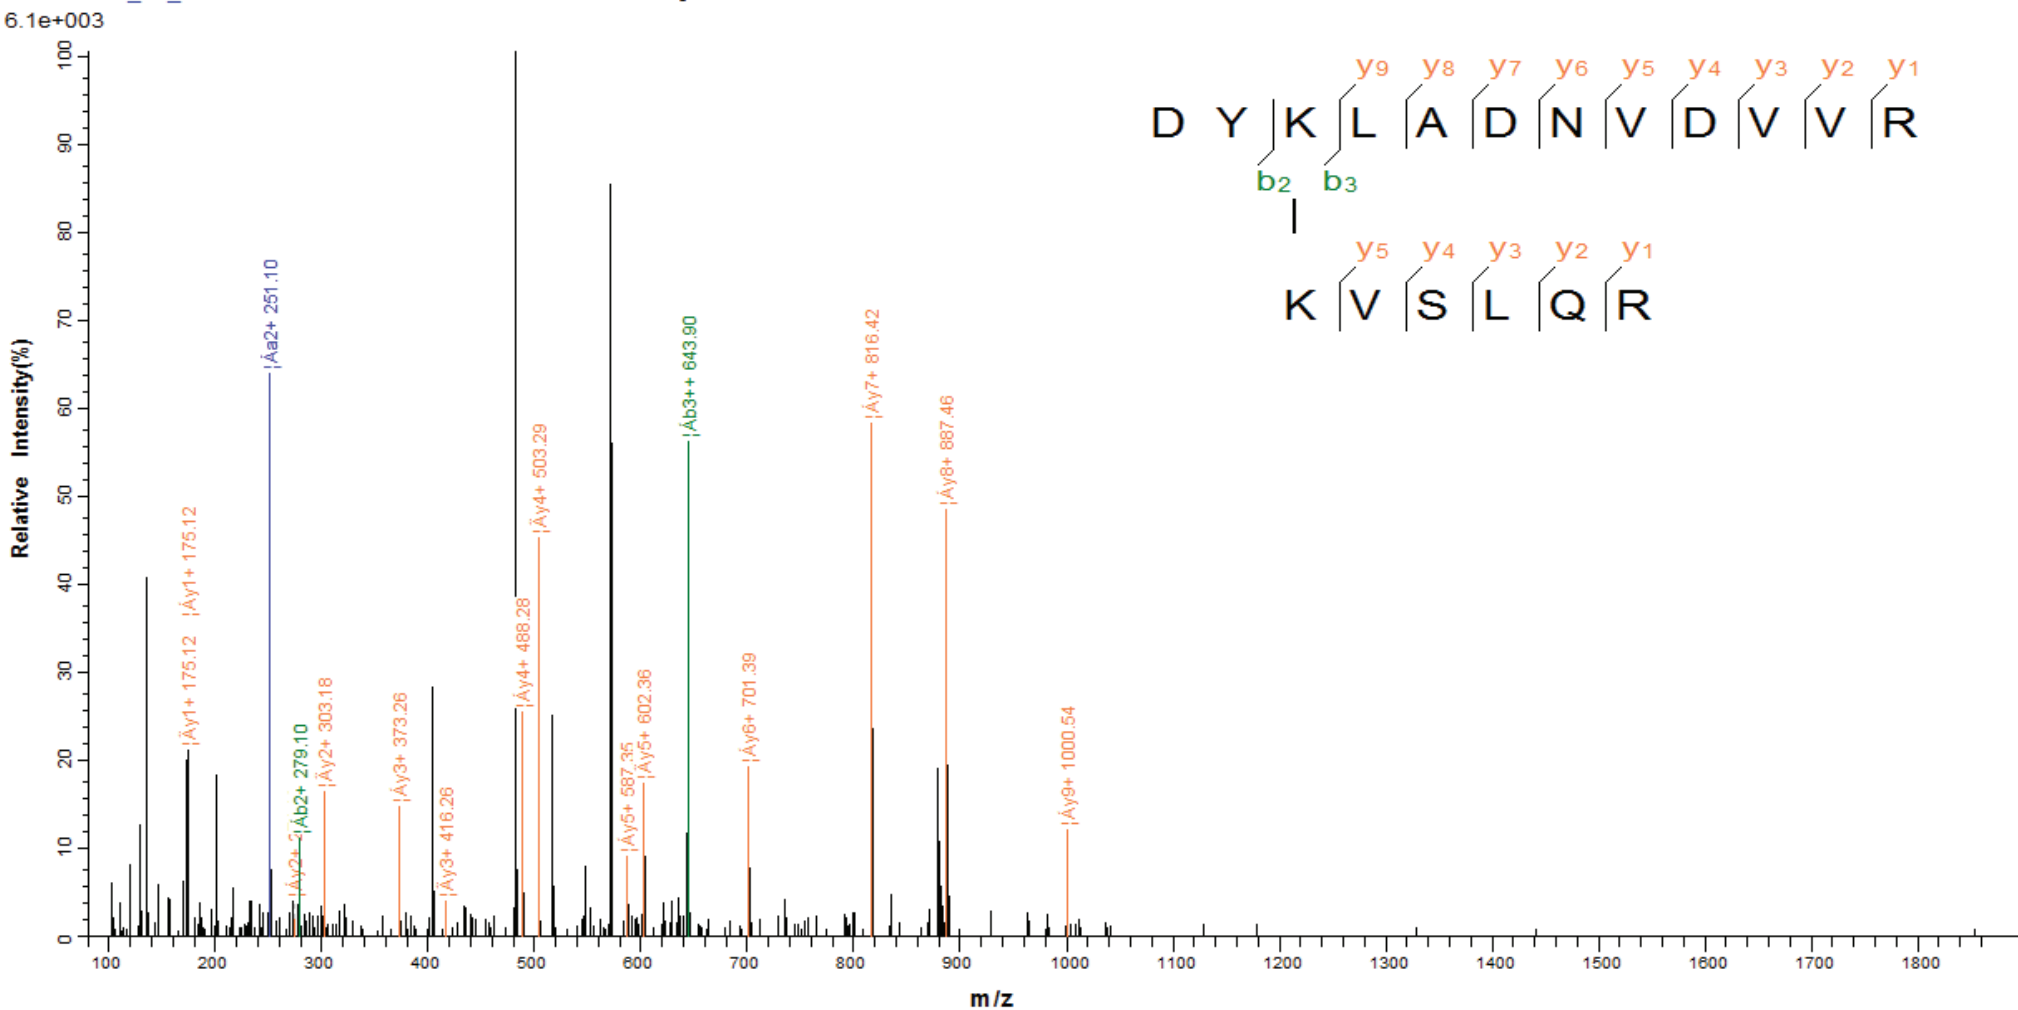

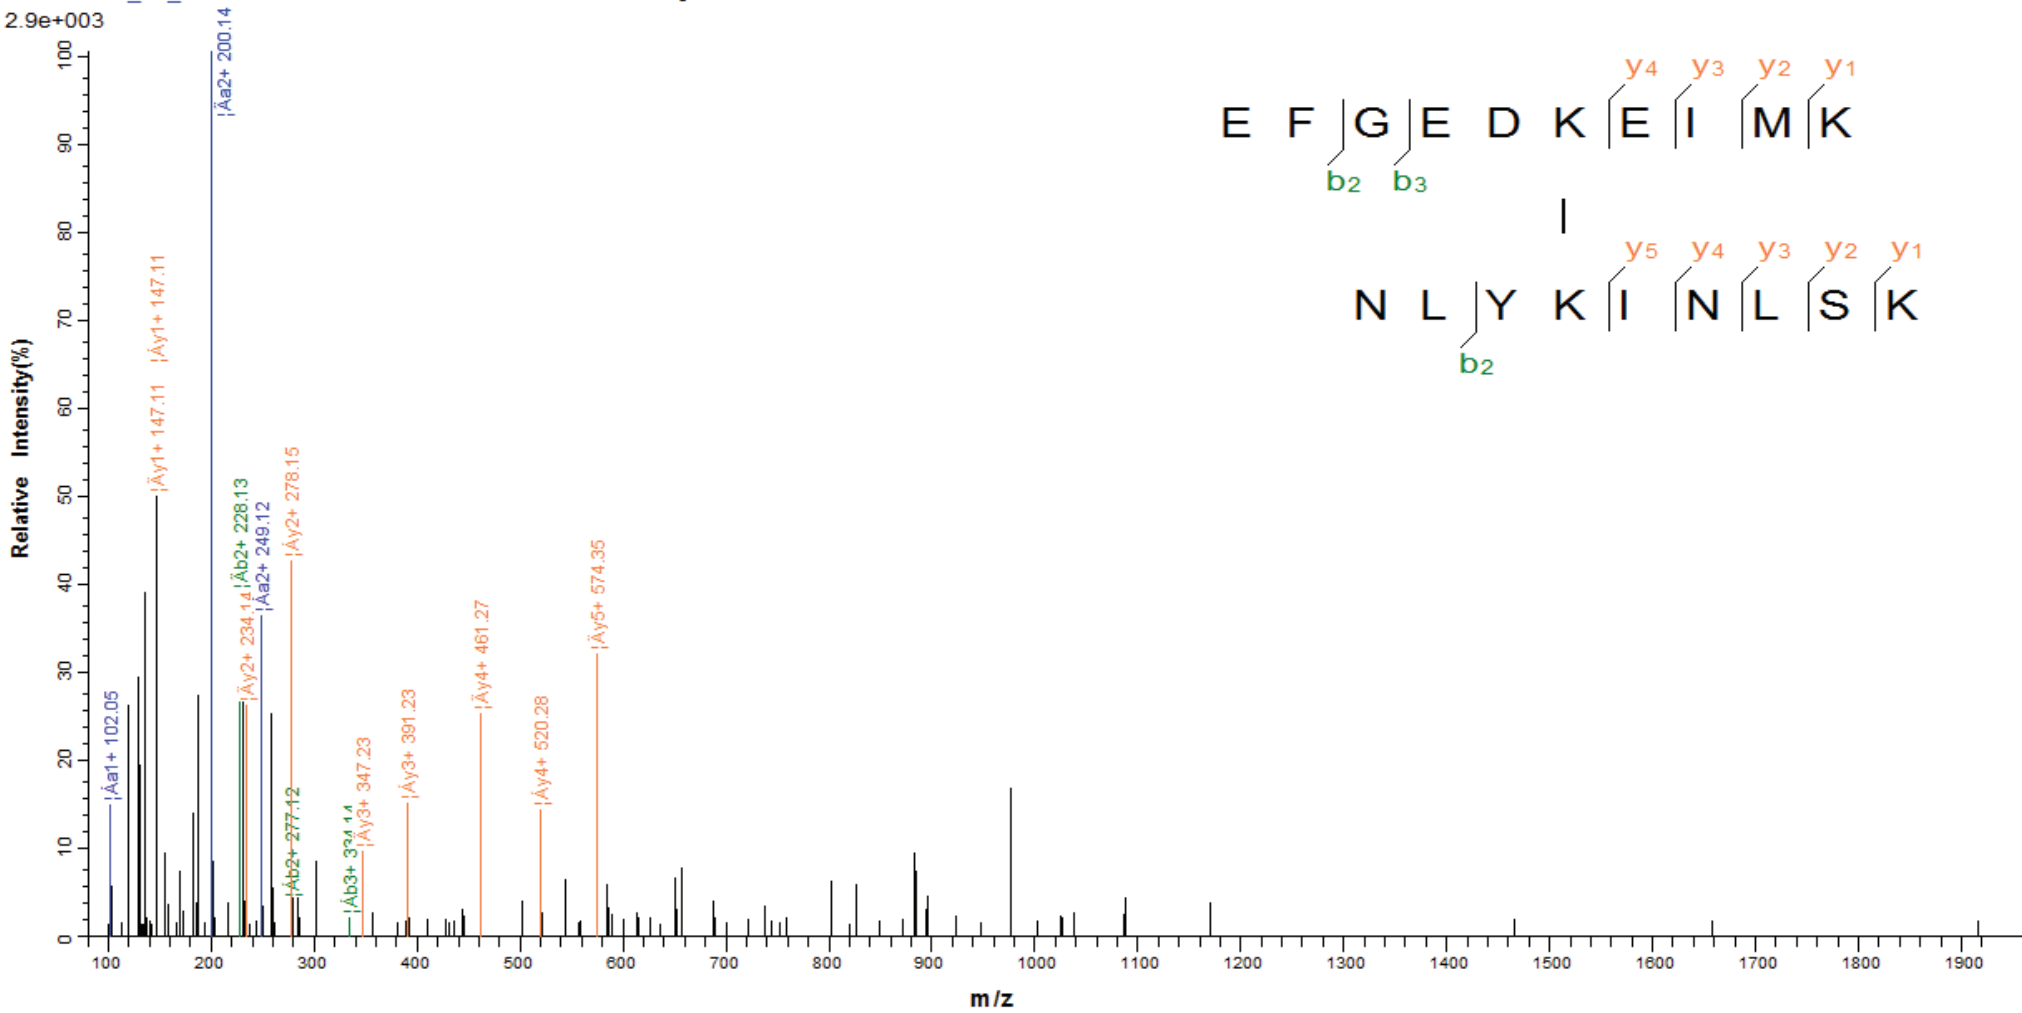



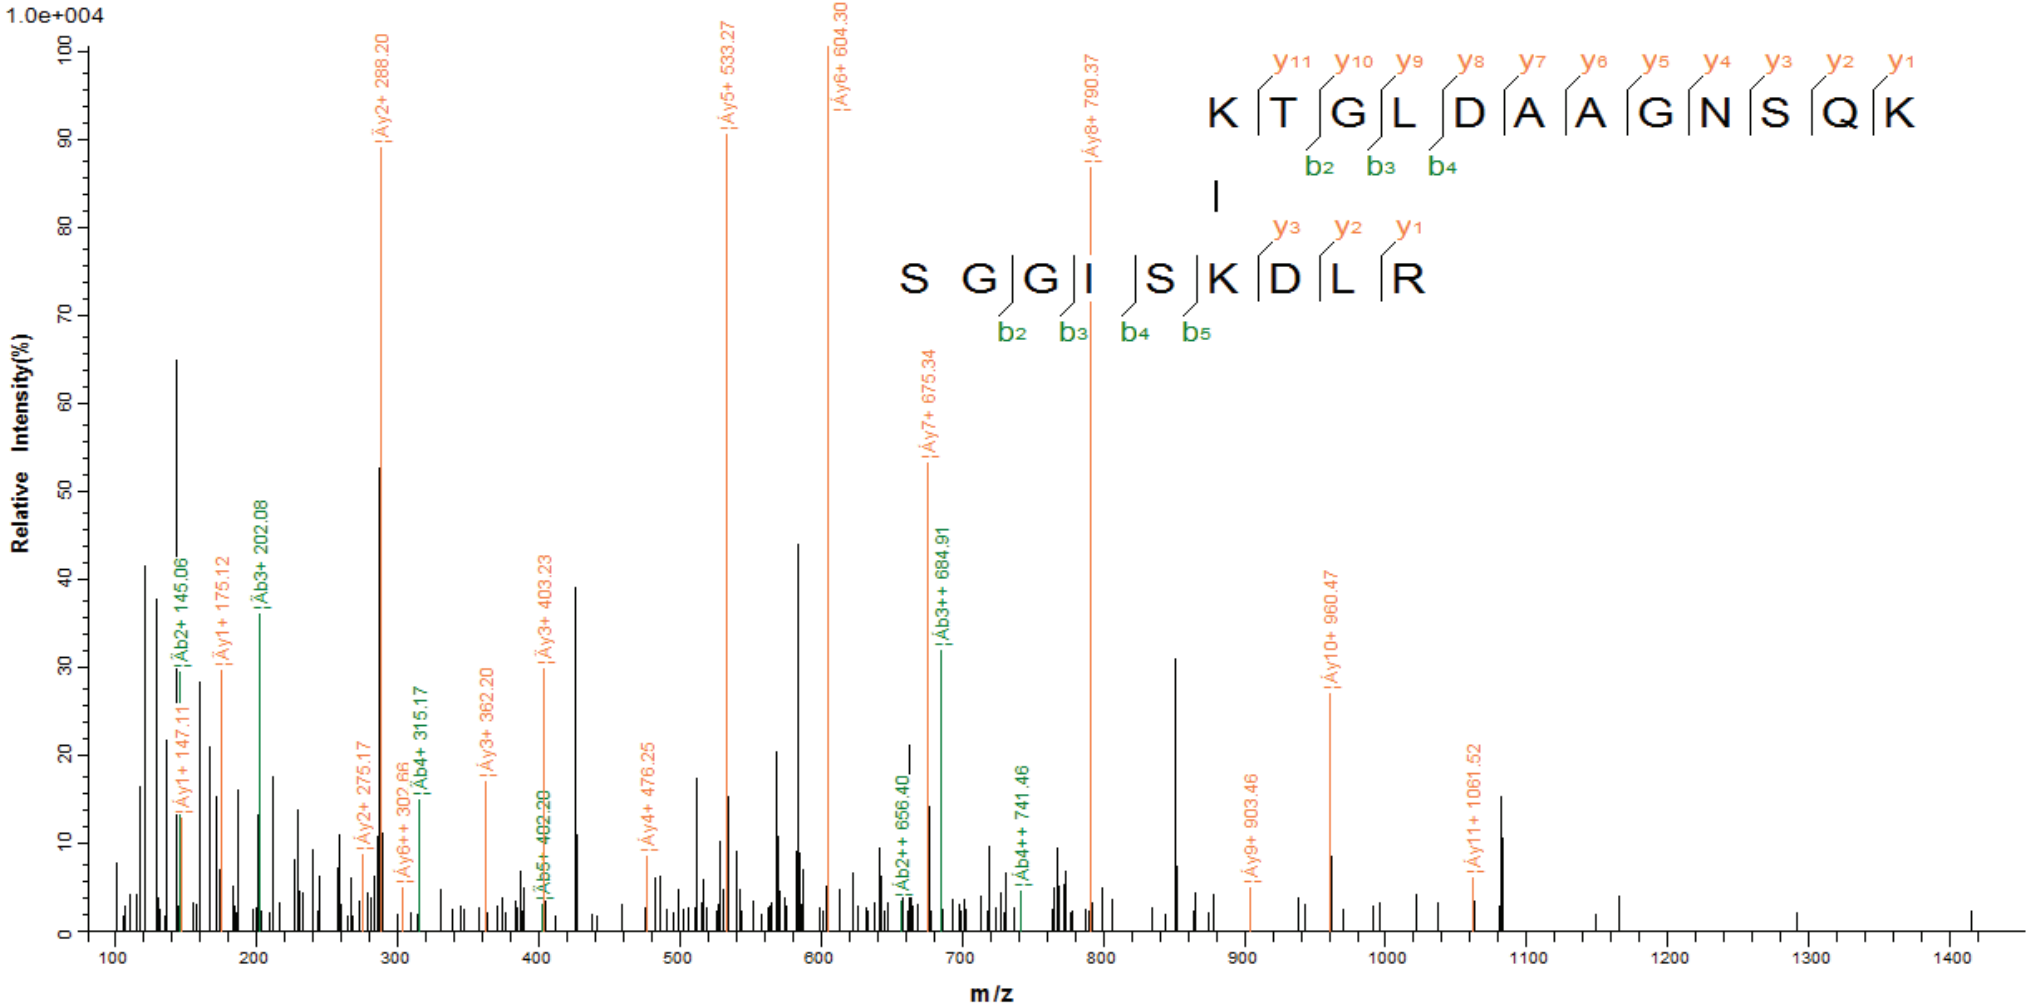

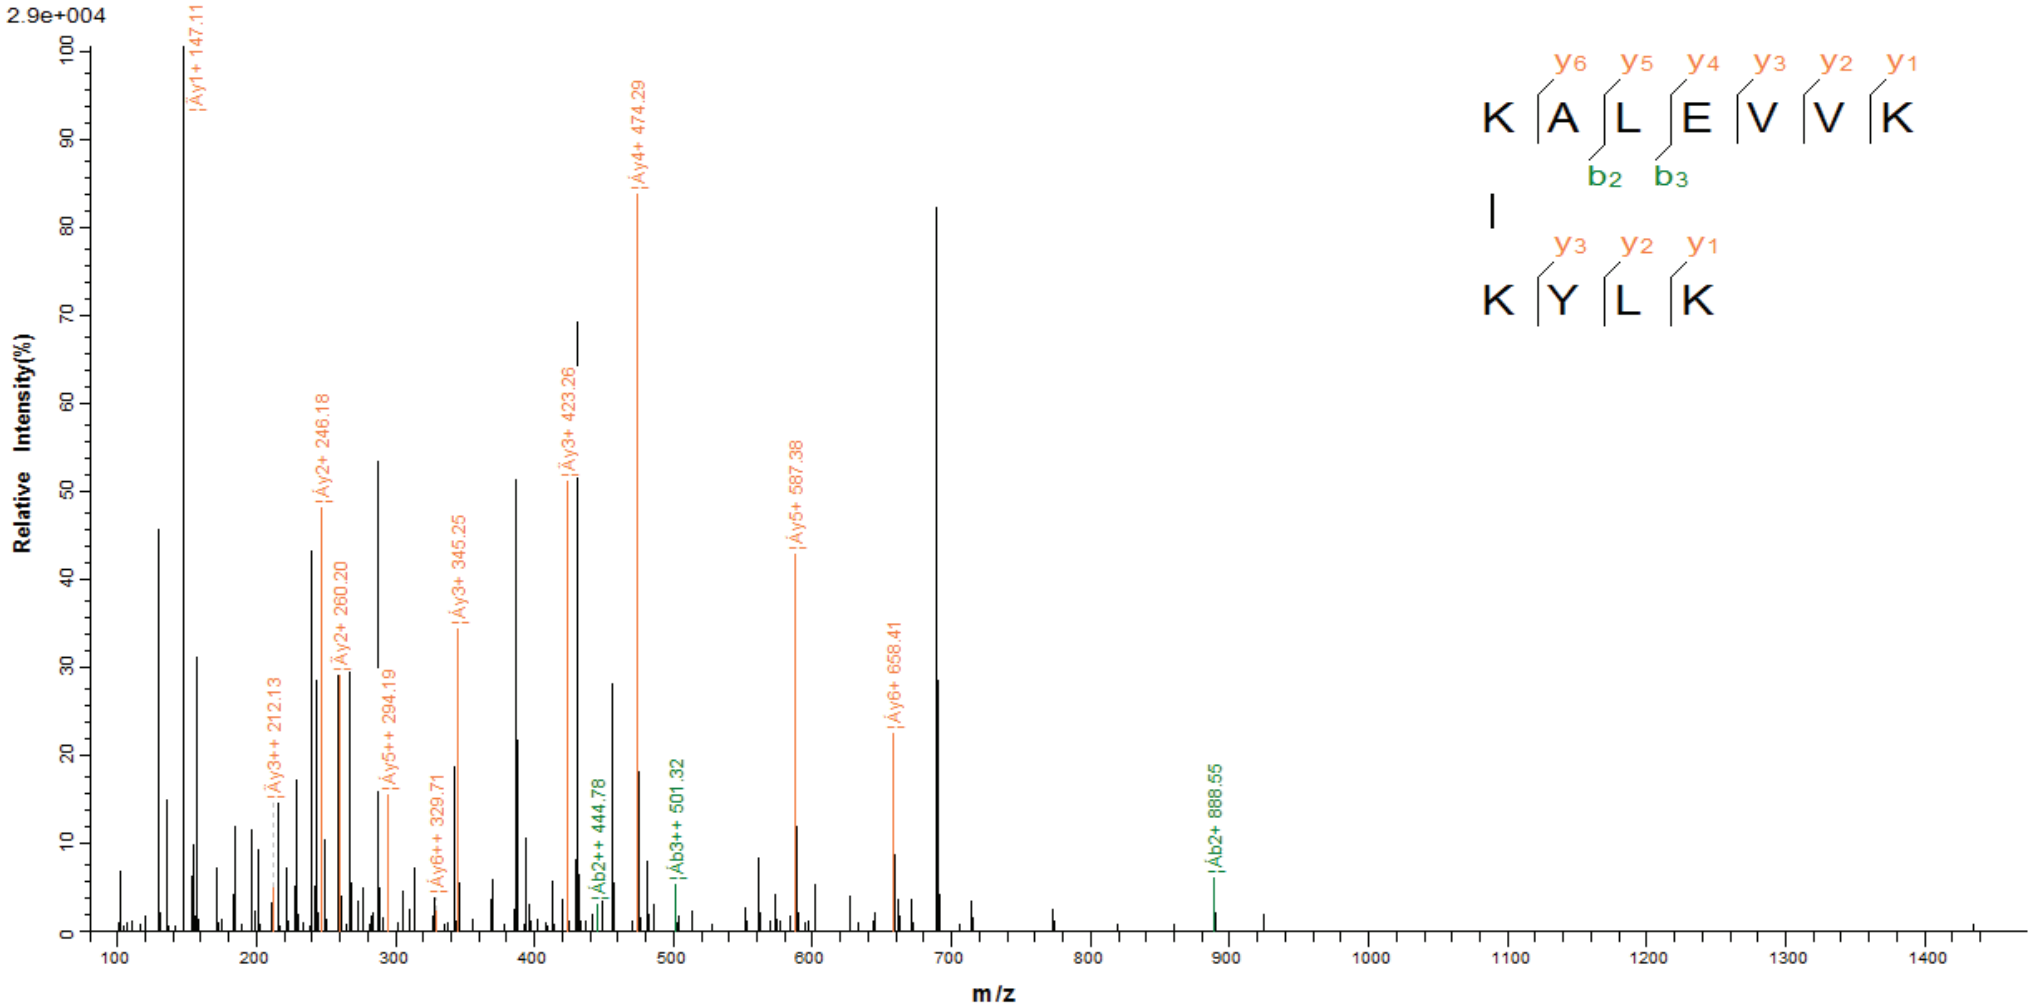

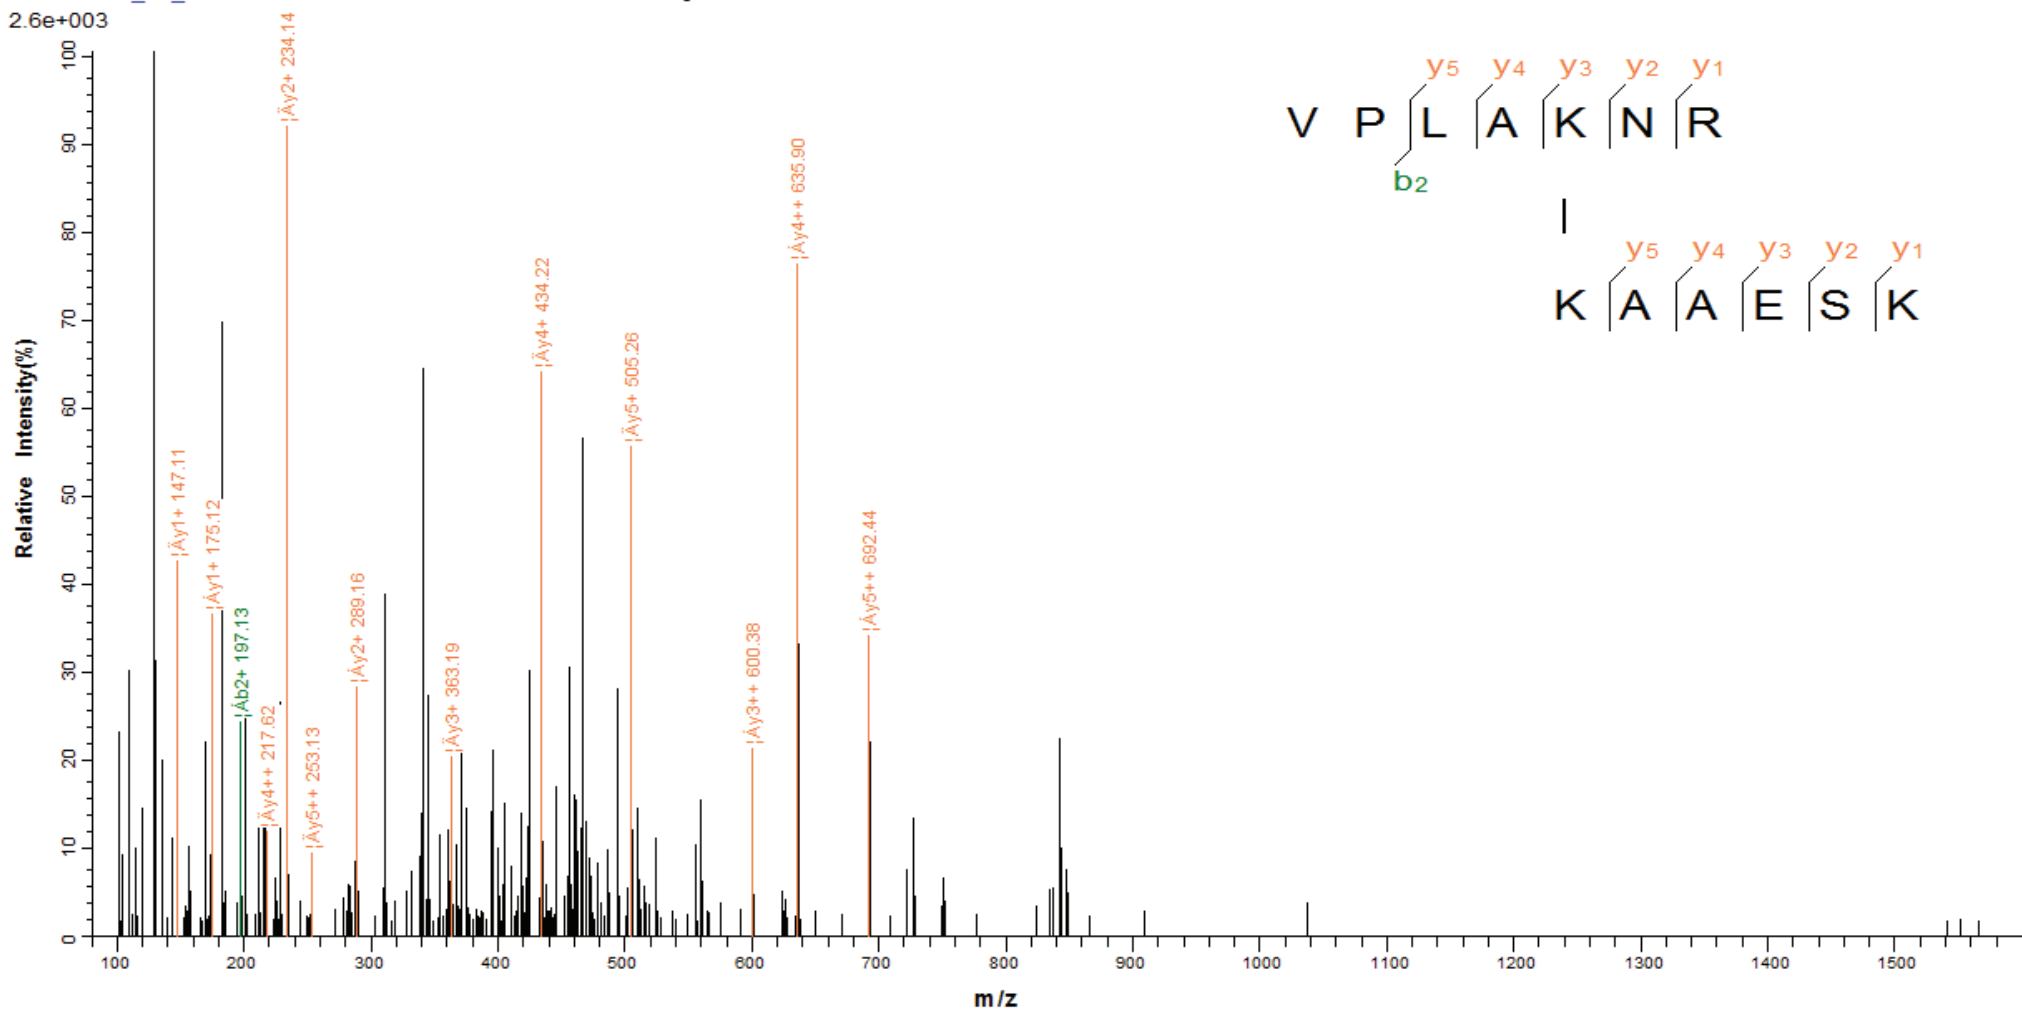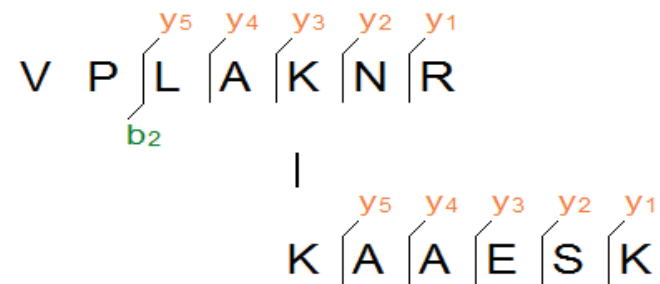

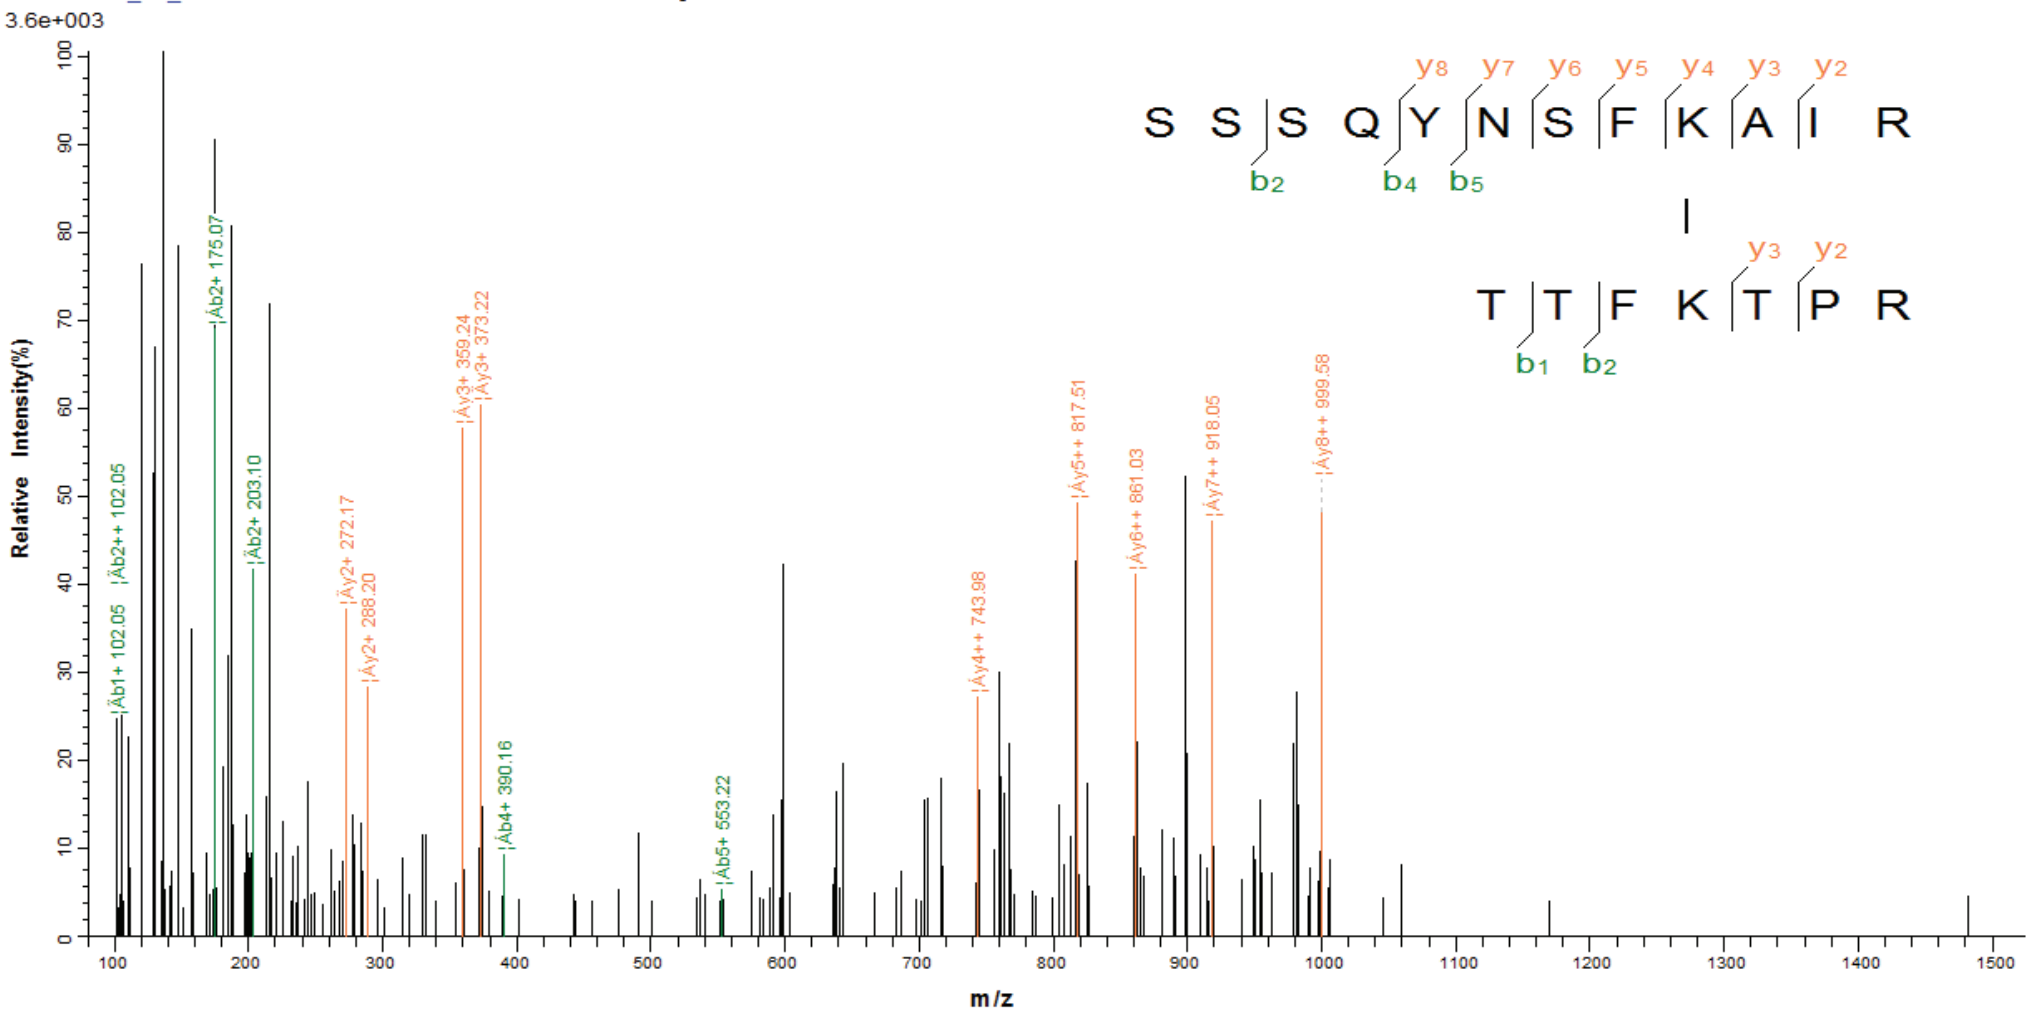

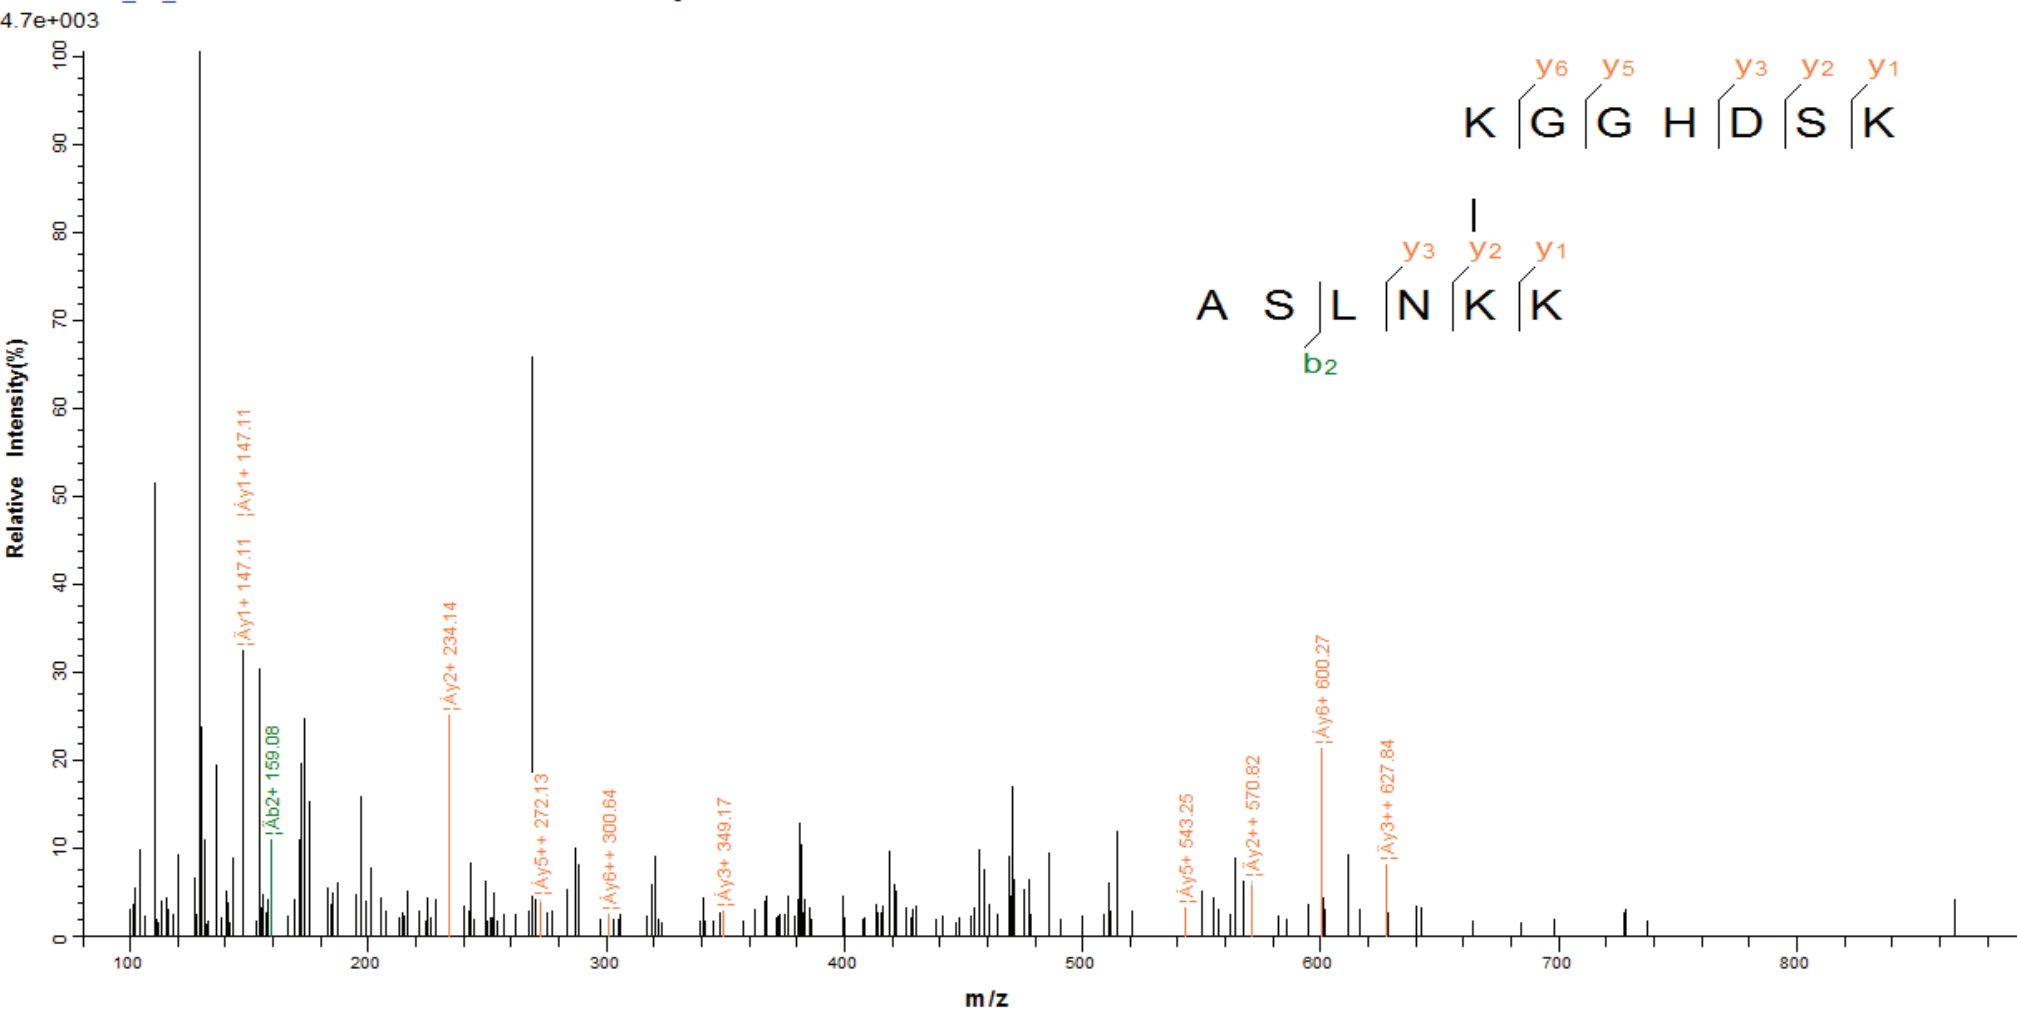

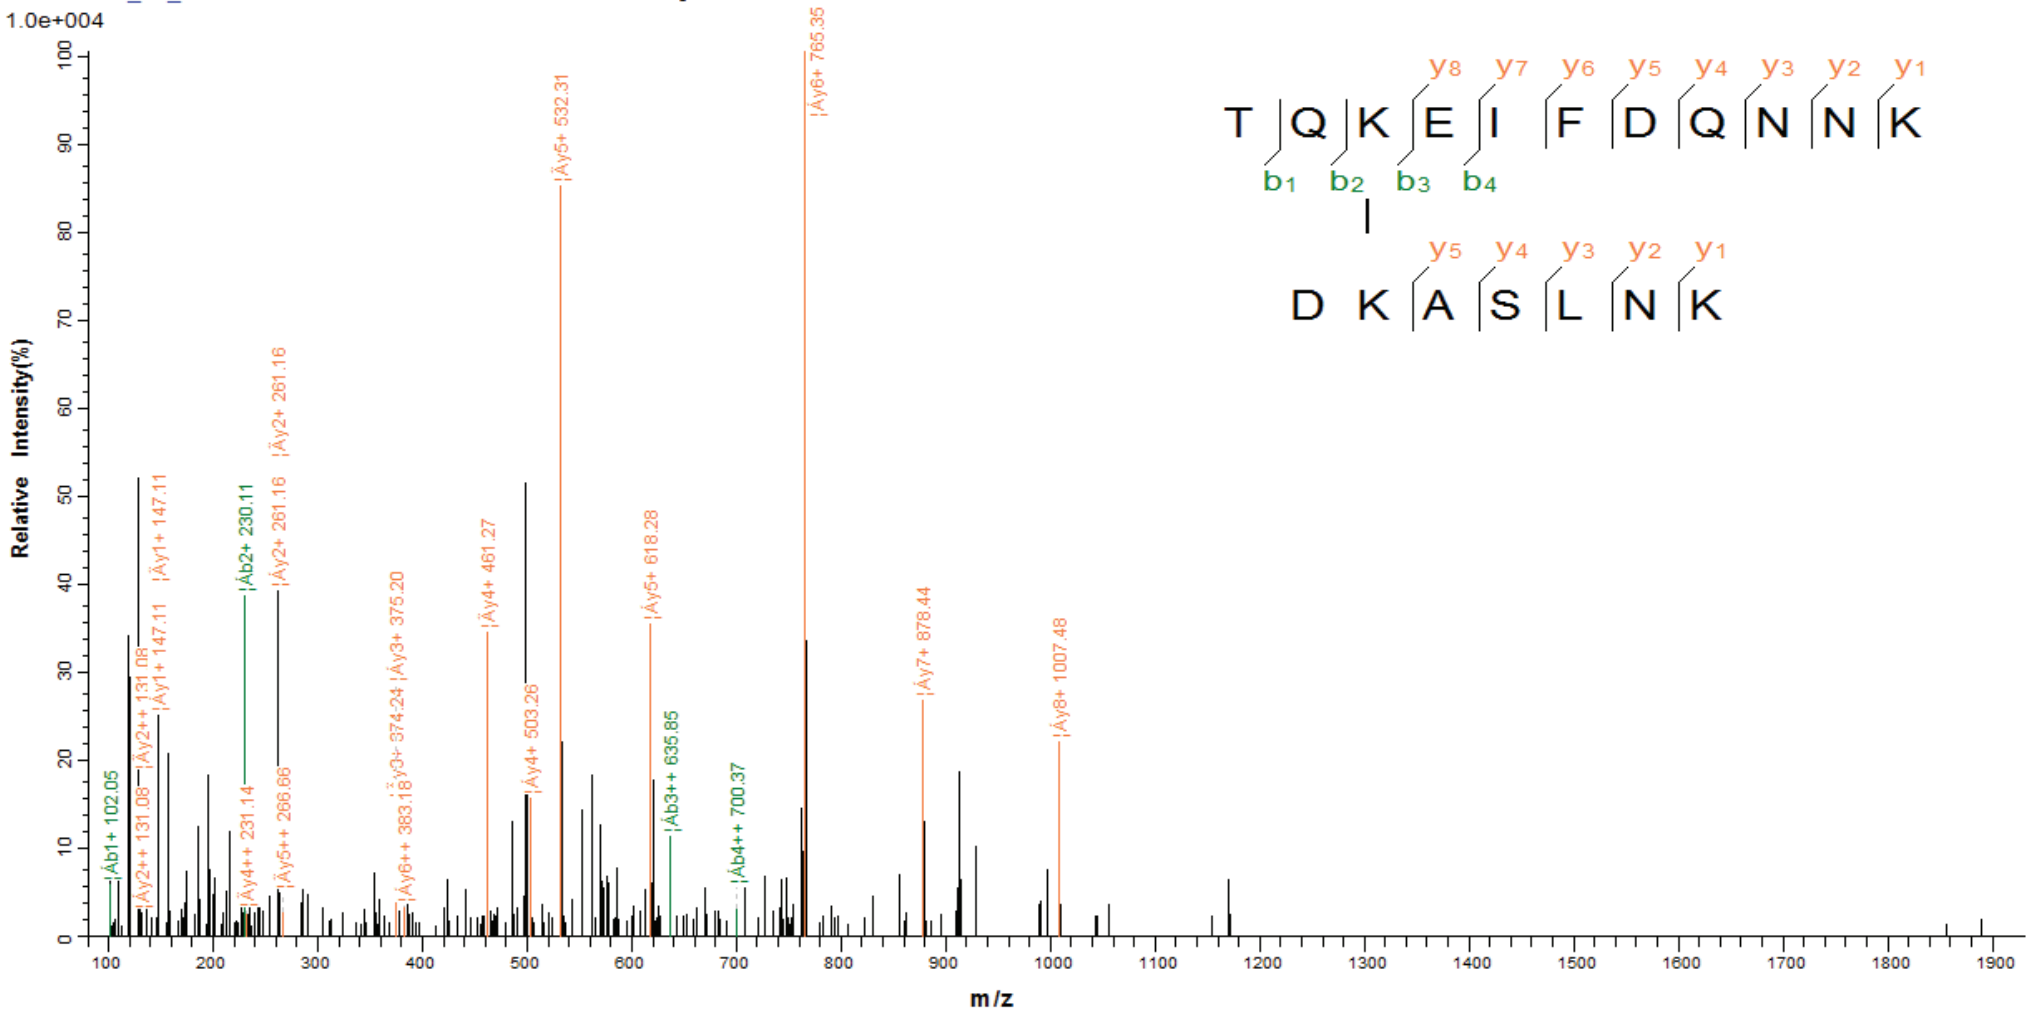

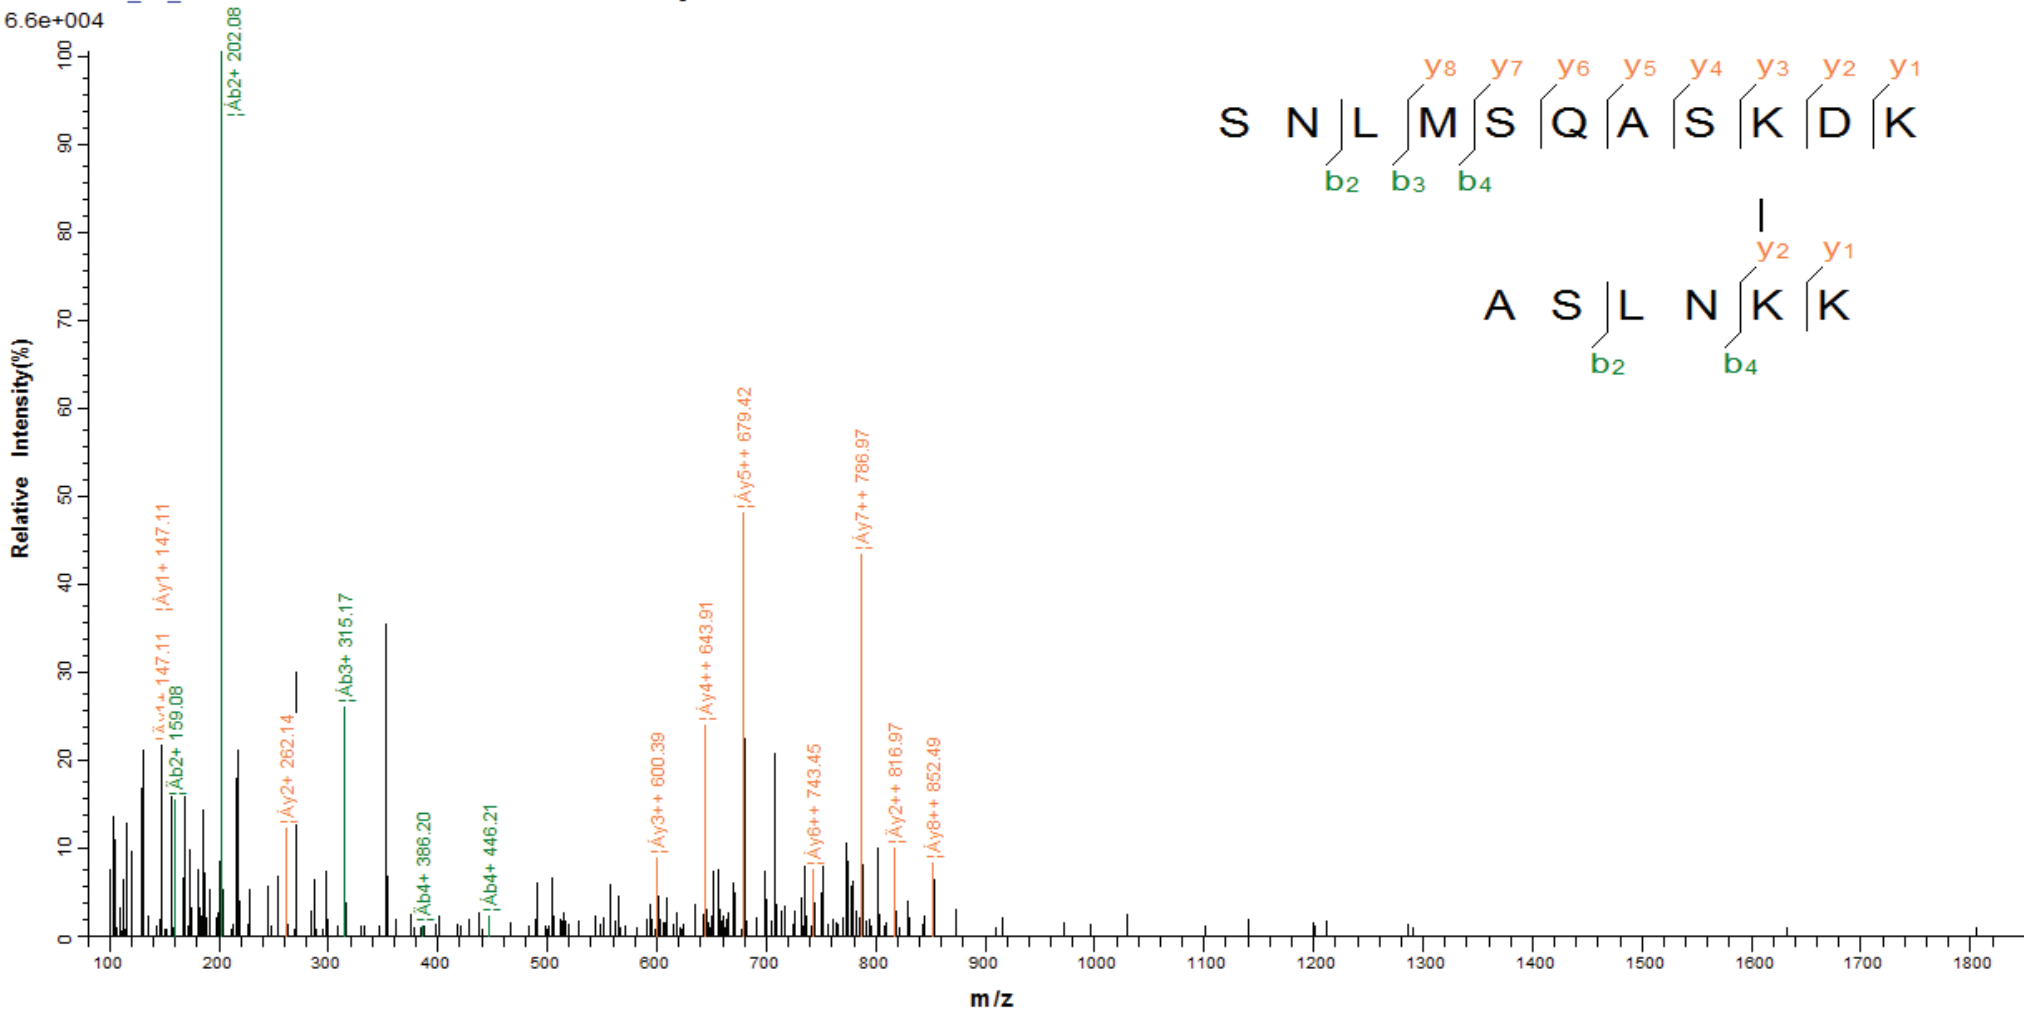

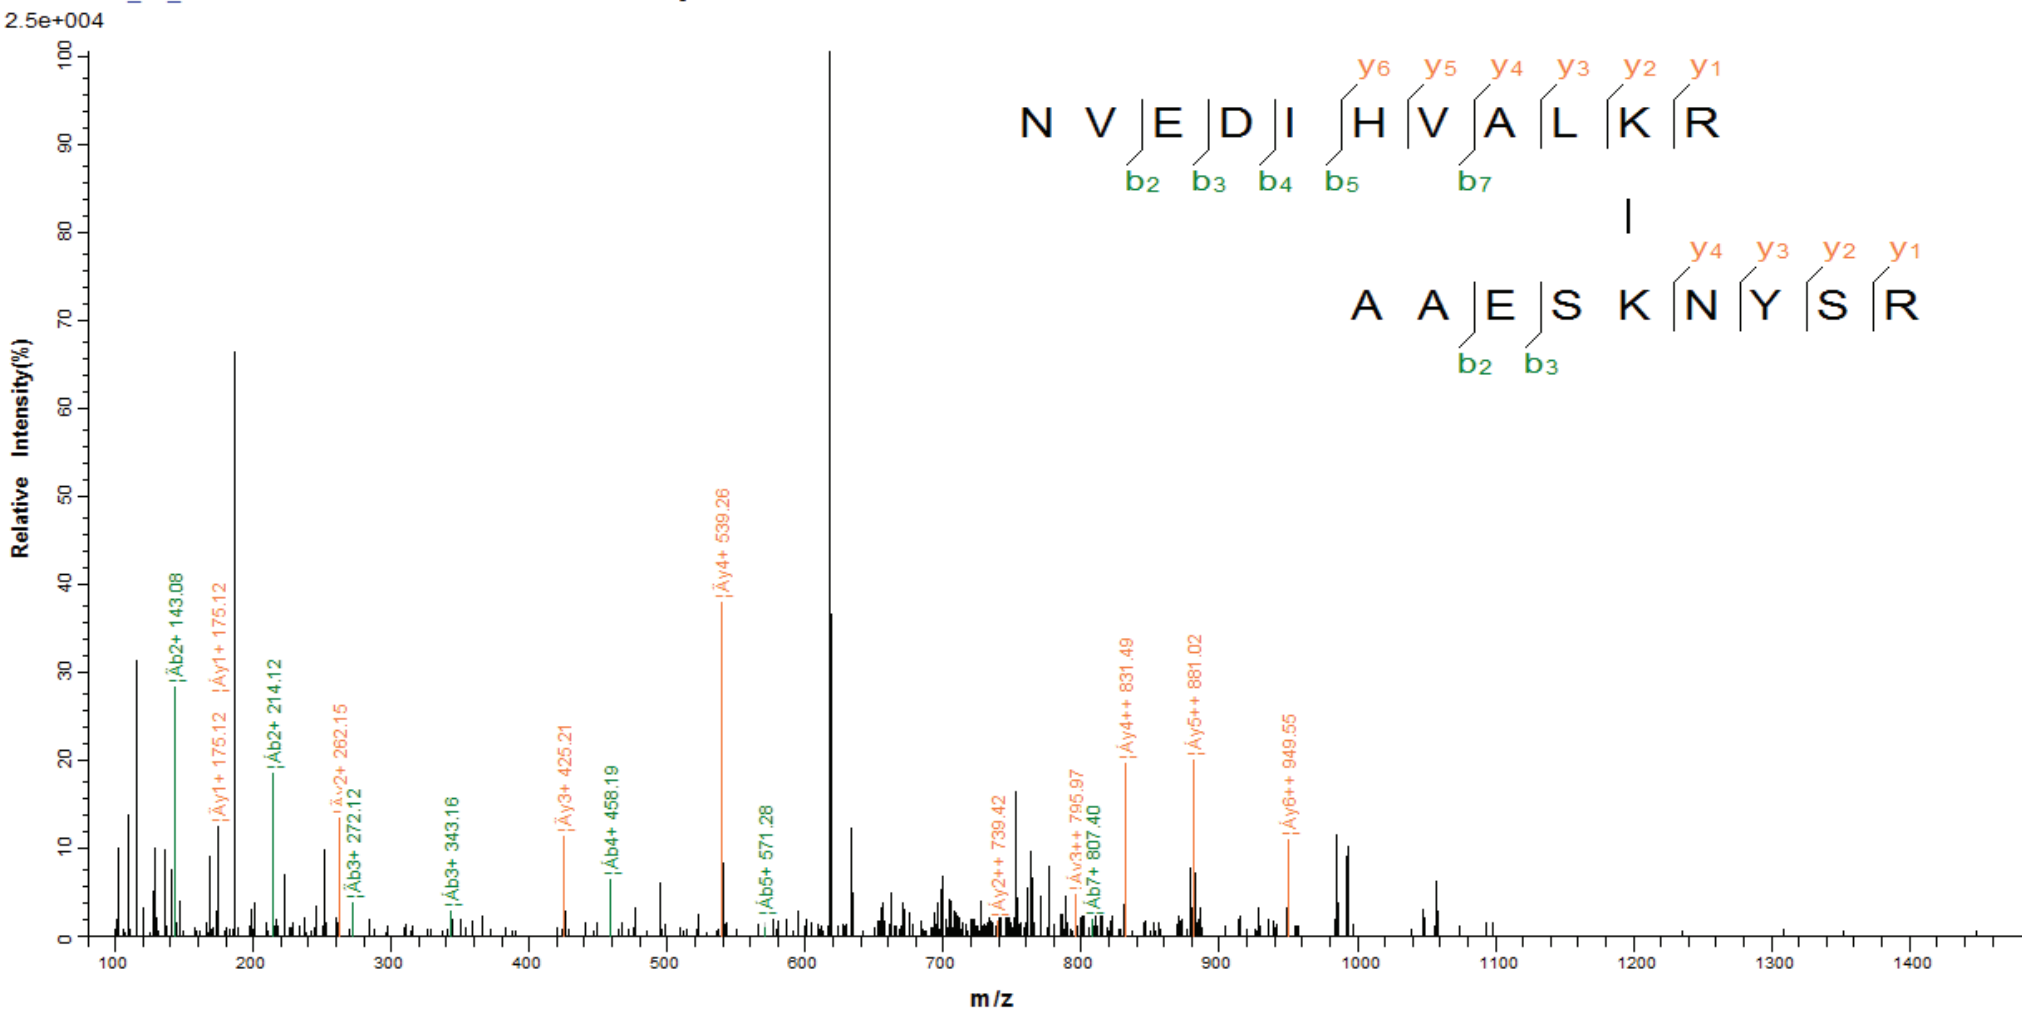



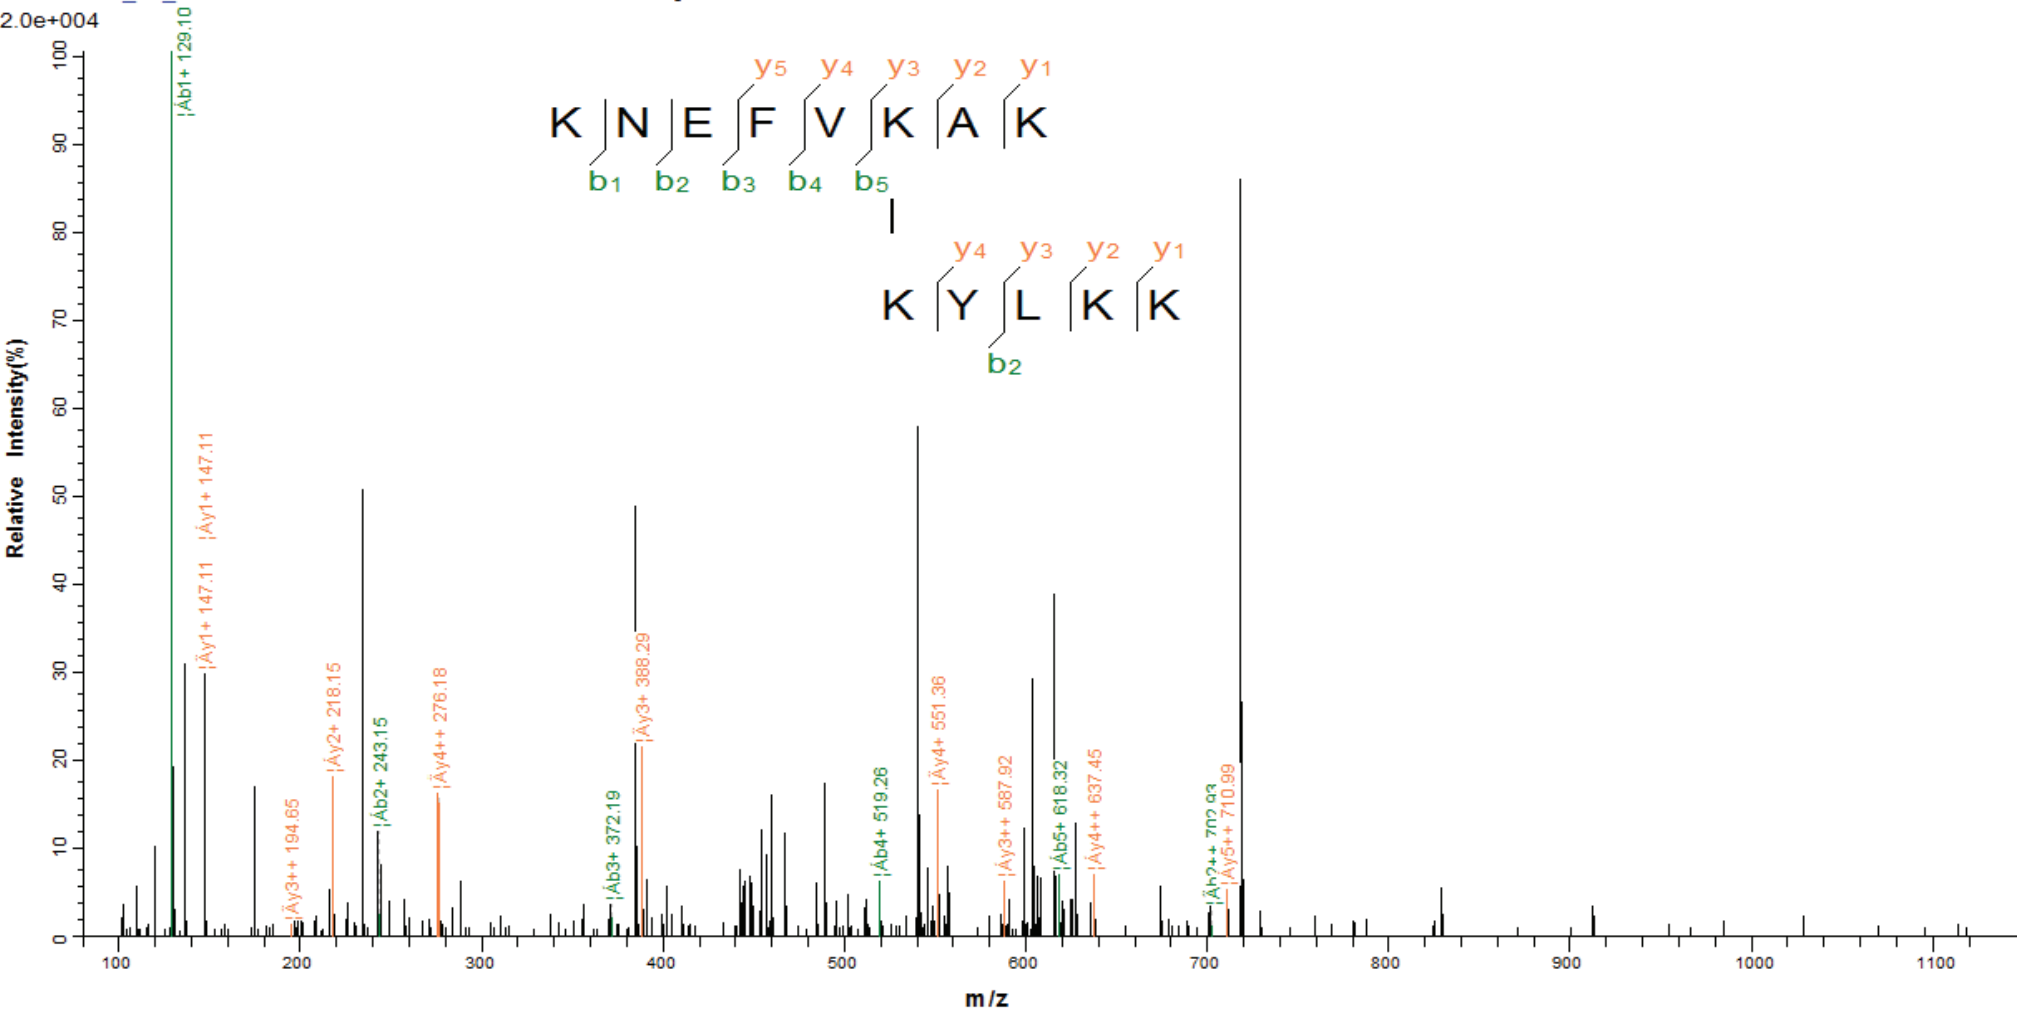

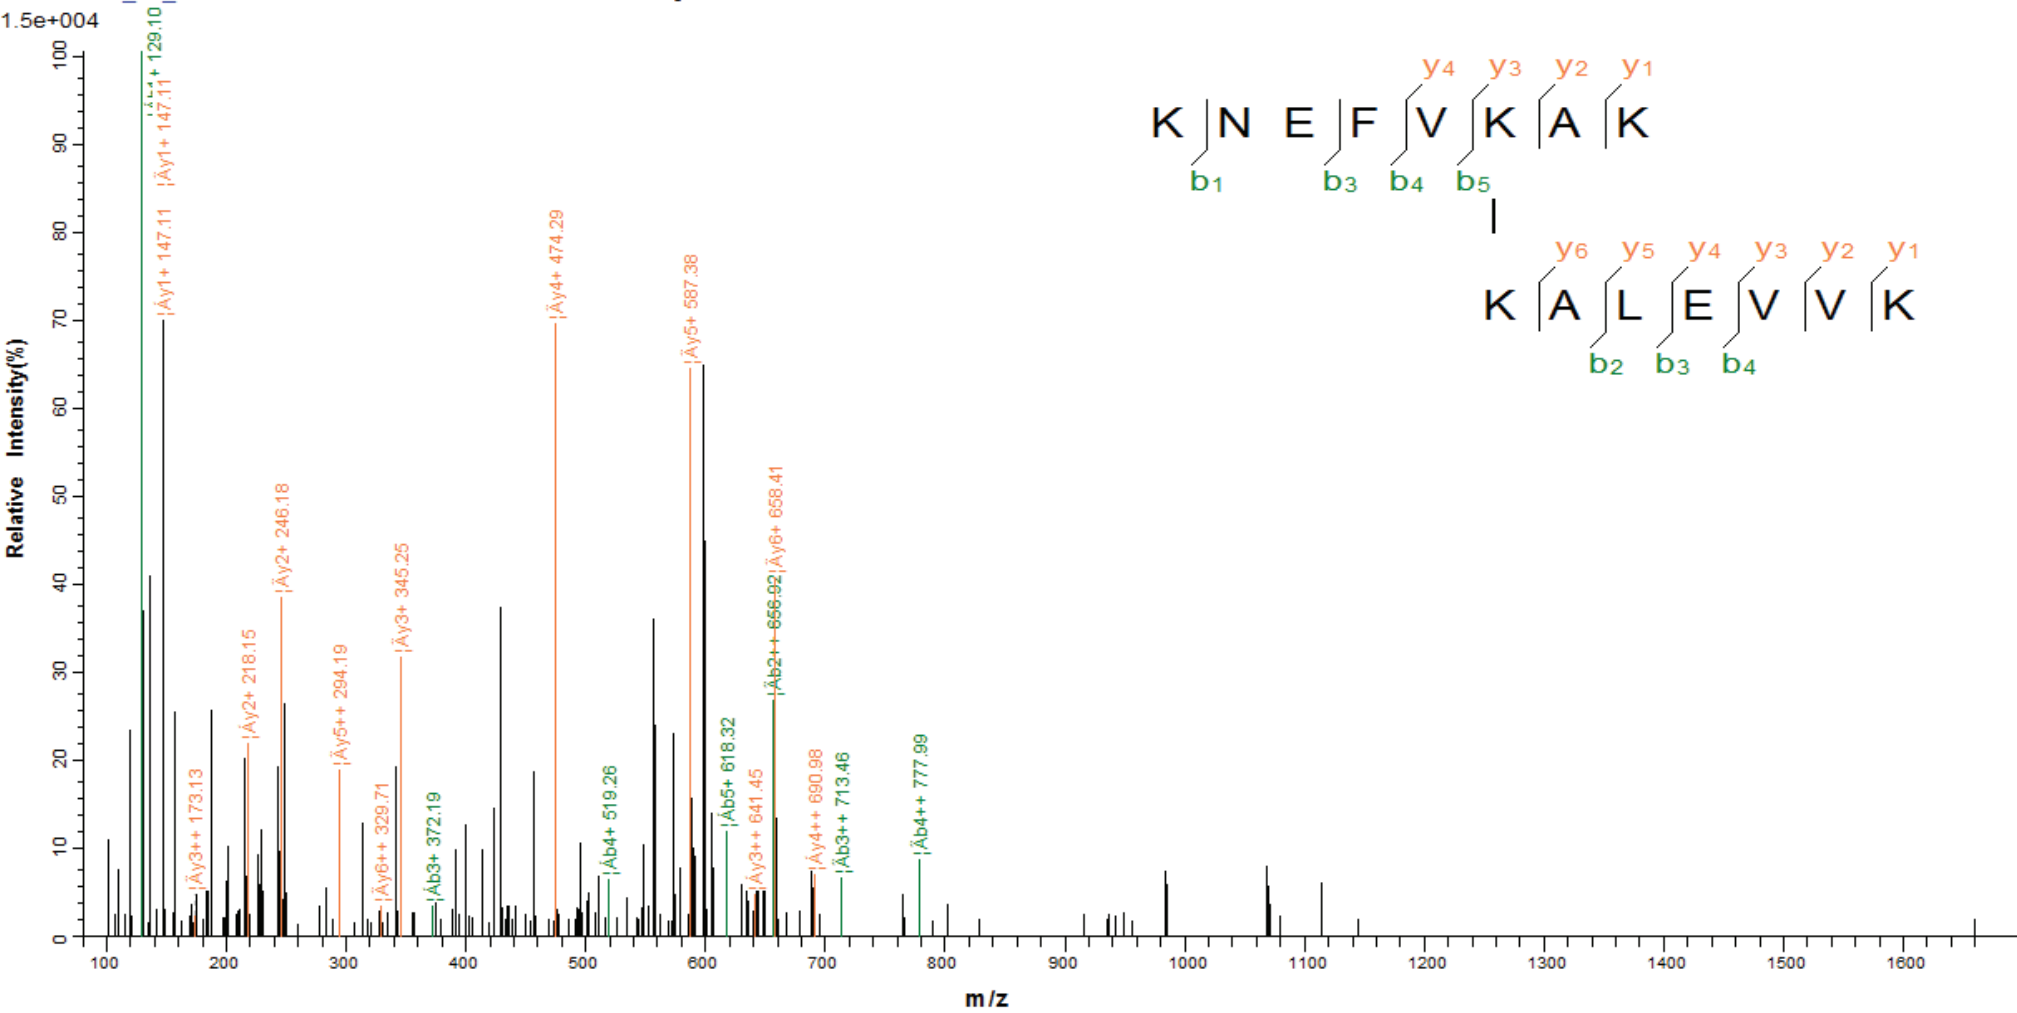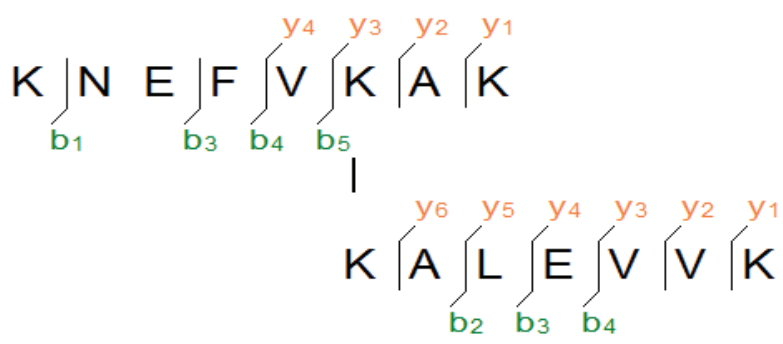

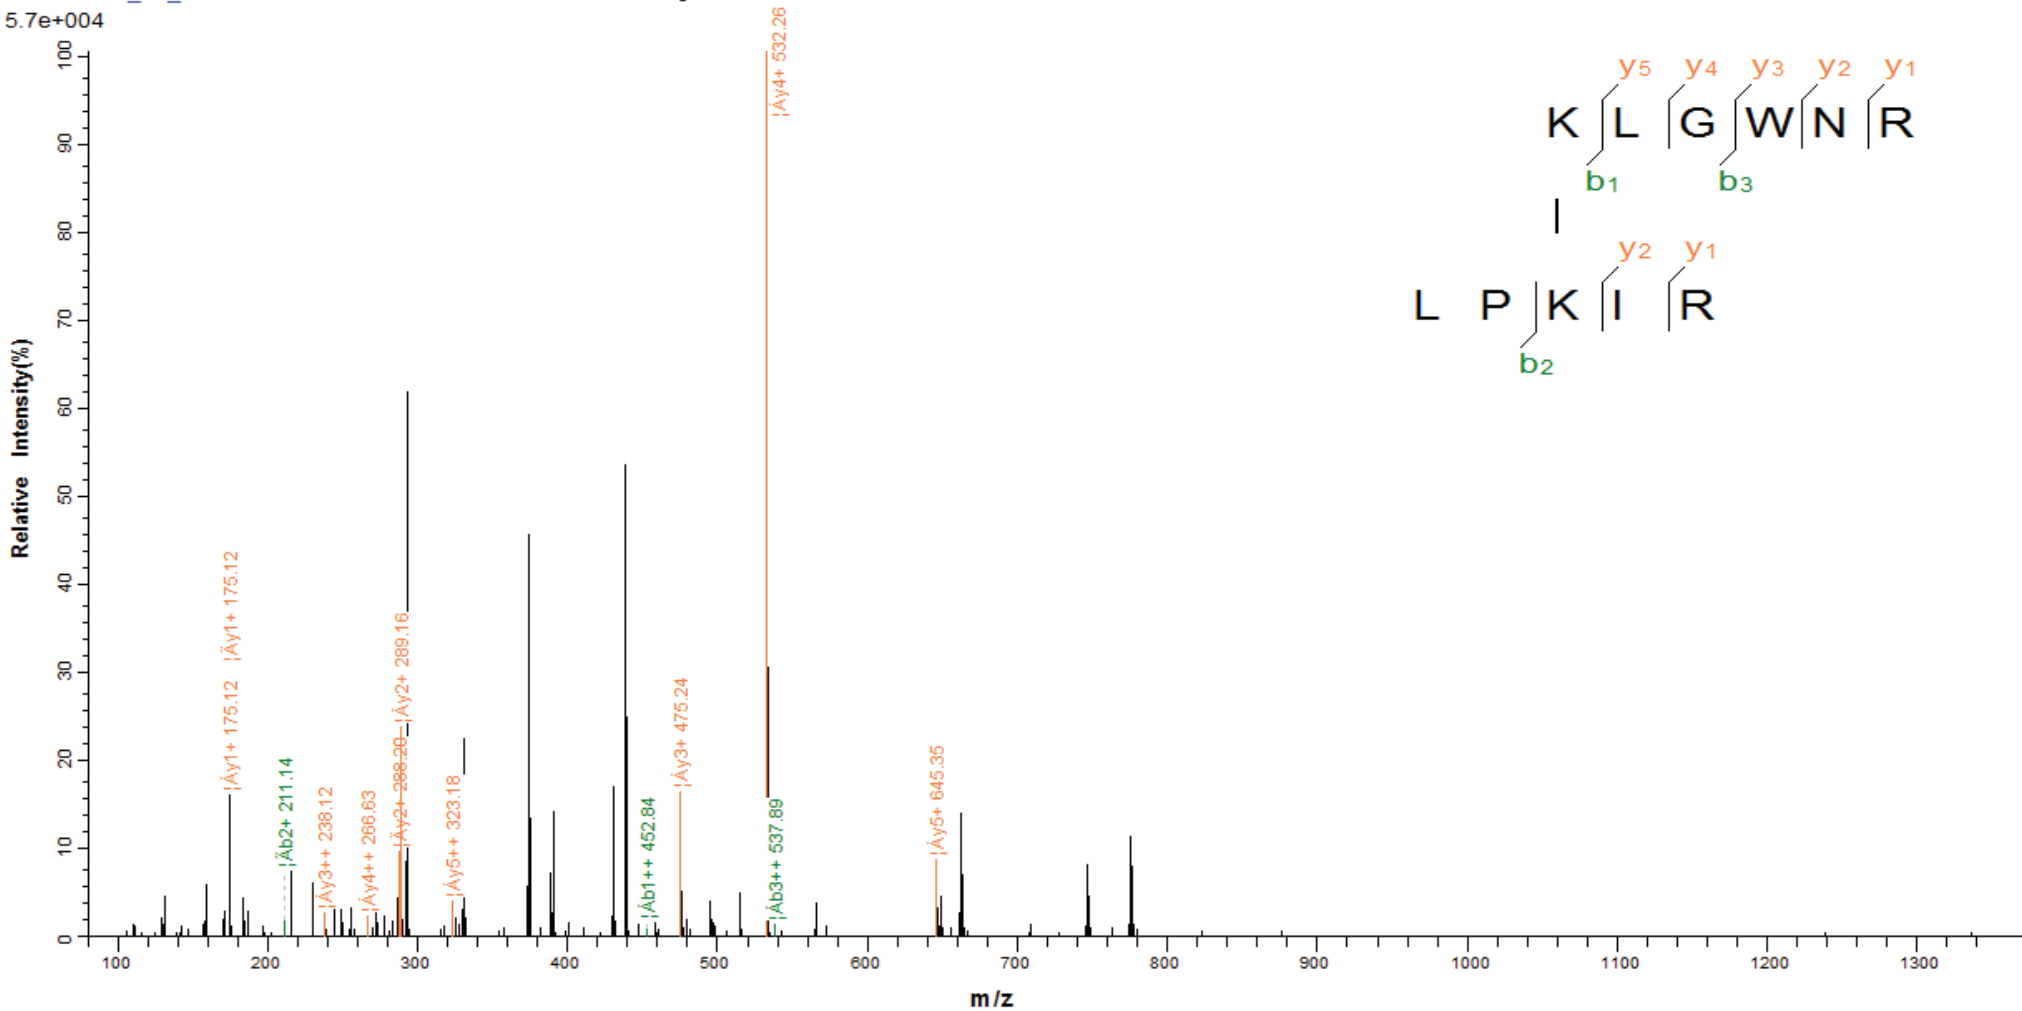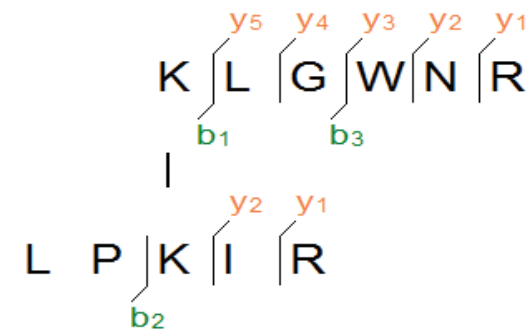

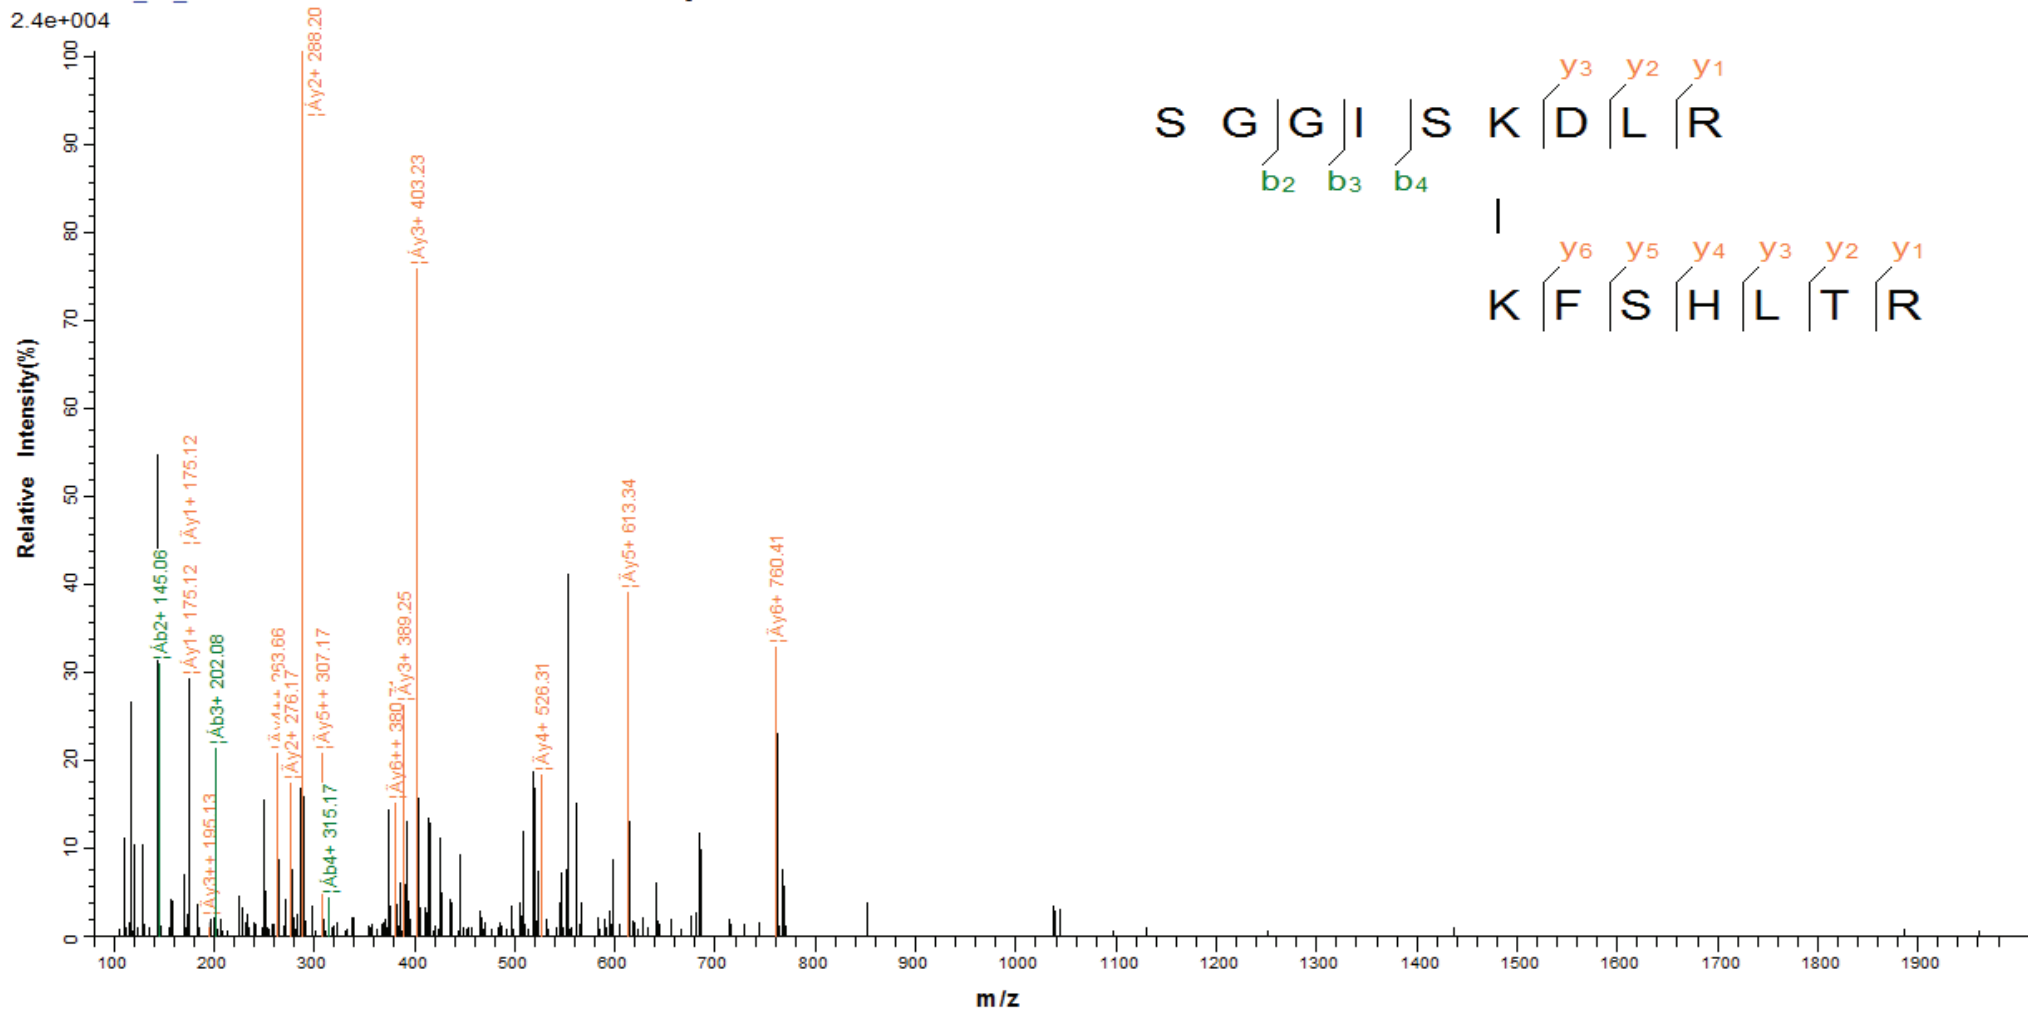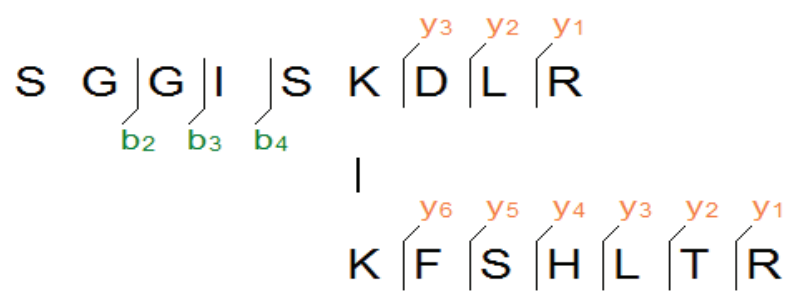



APC\_A9\_140131205754.003067.003067.4.dta Seq: KALEVVK-KLQK

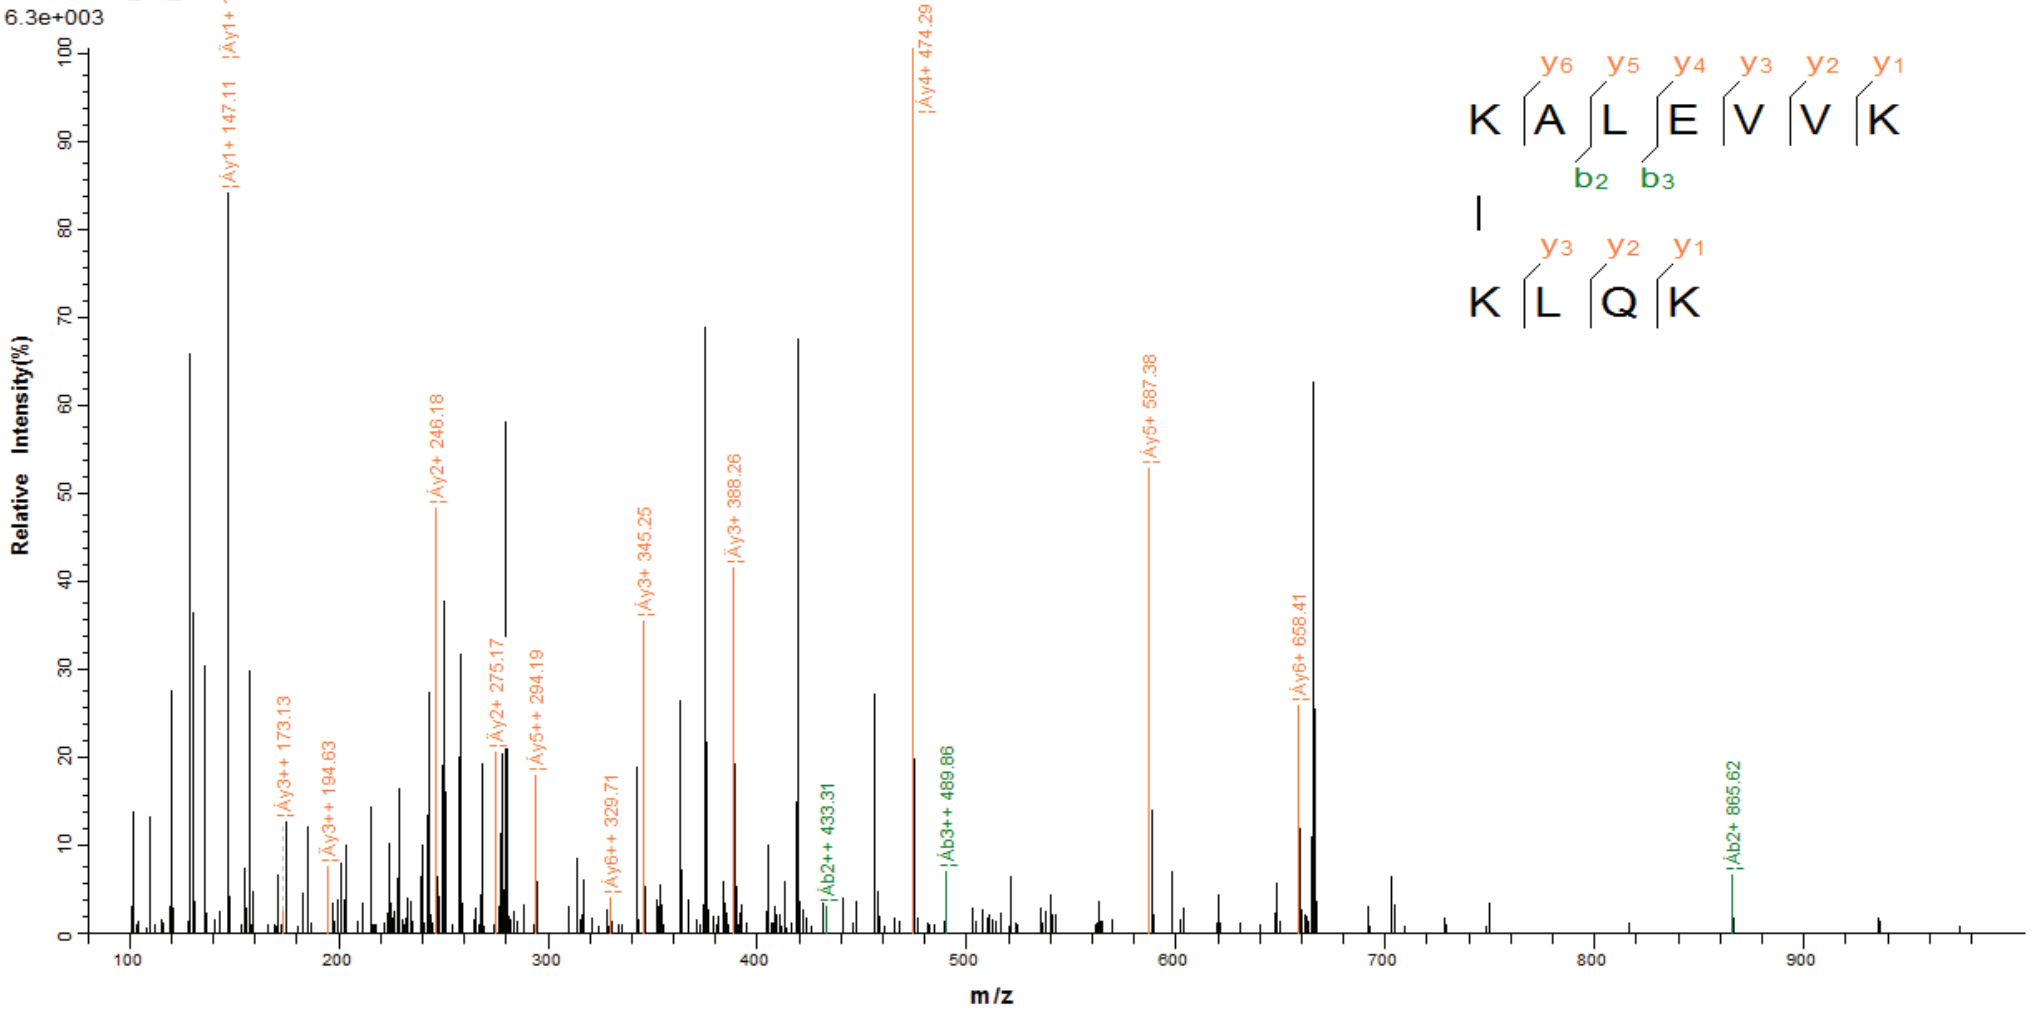

APC\_A9\_140131205754.004339.004339.4.dta

Seq: KALEVVK-KNEFVK

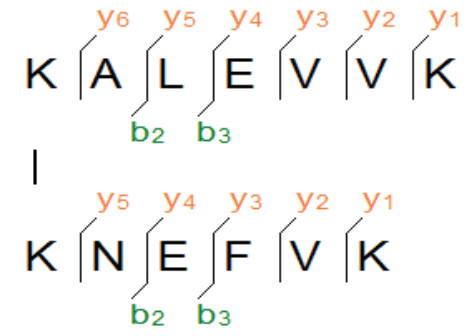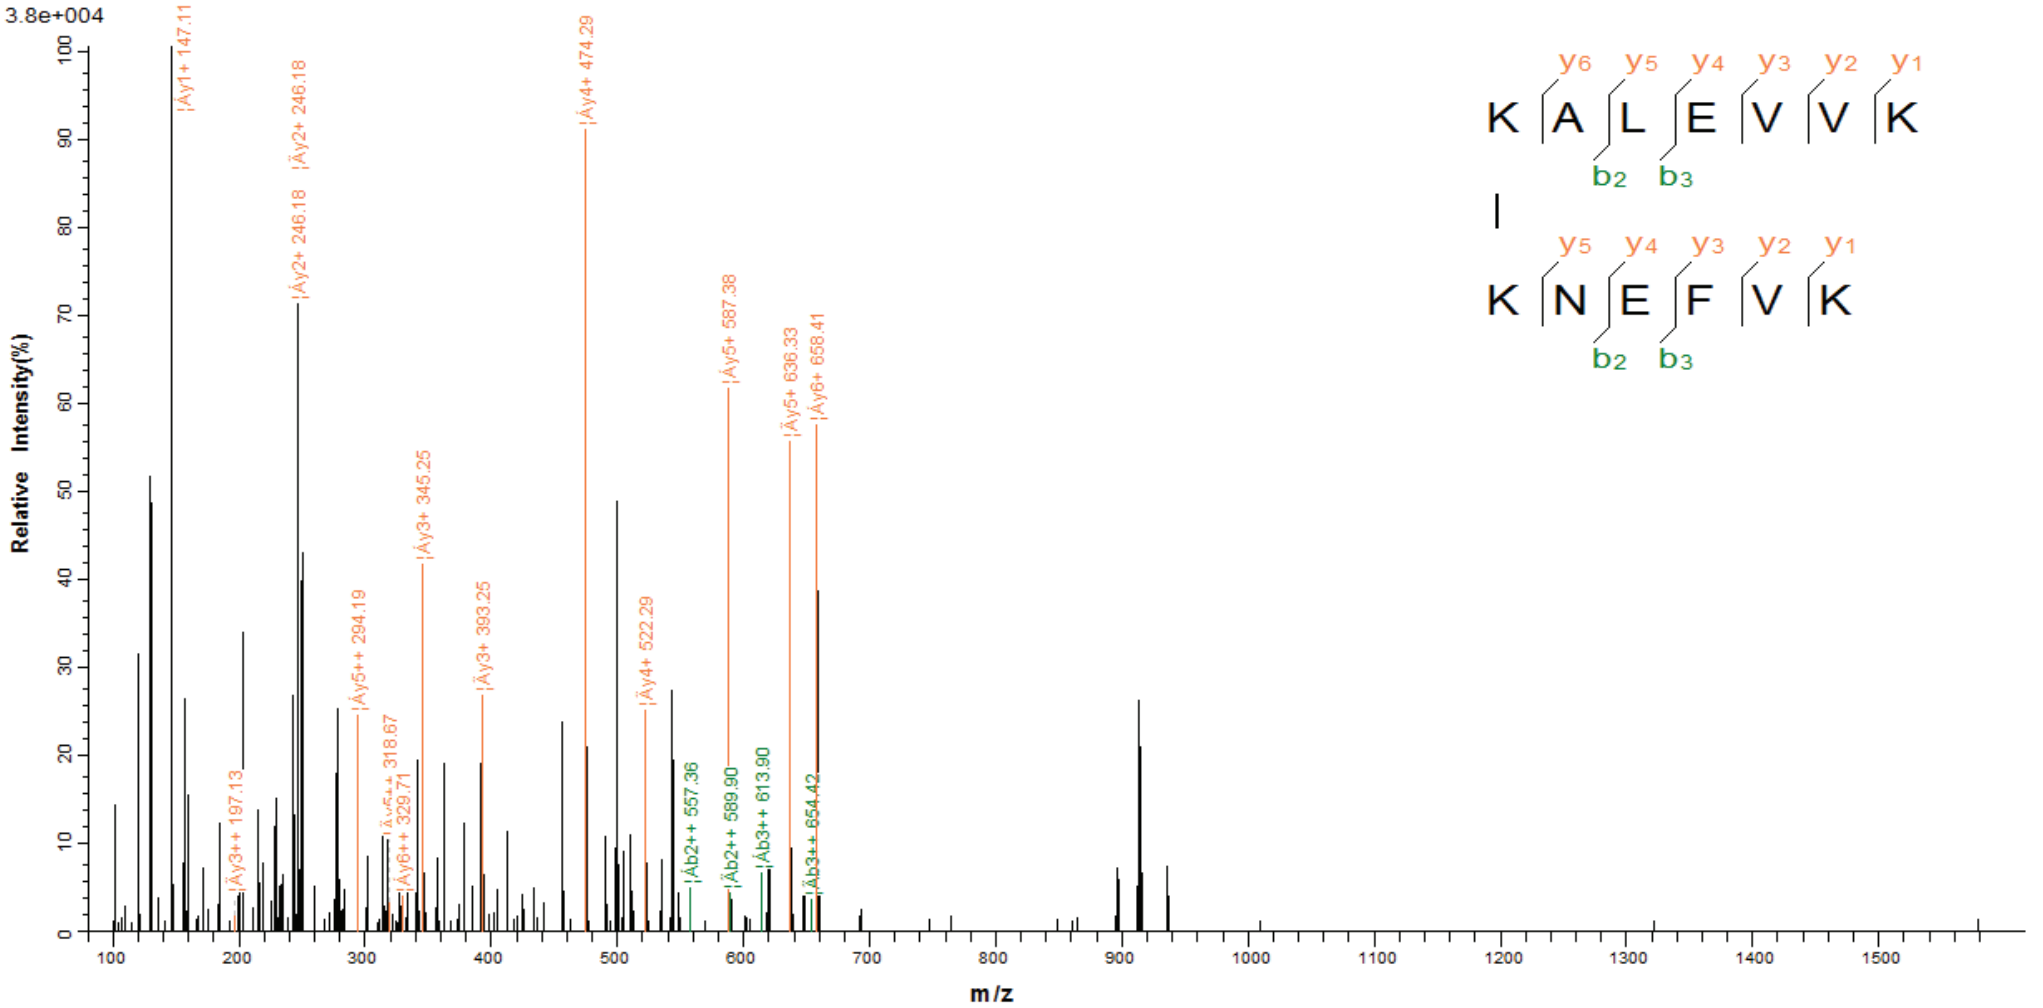

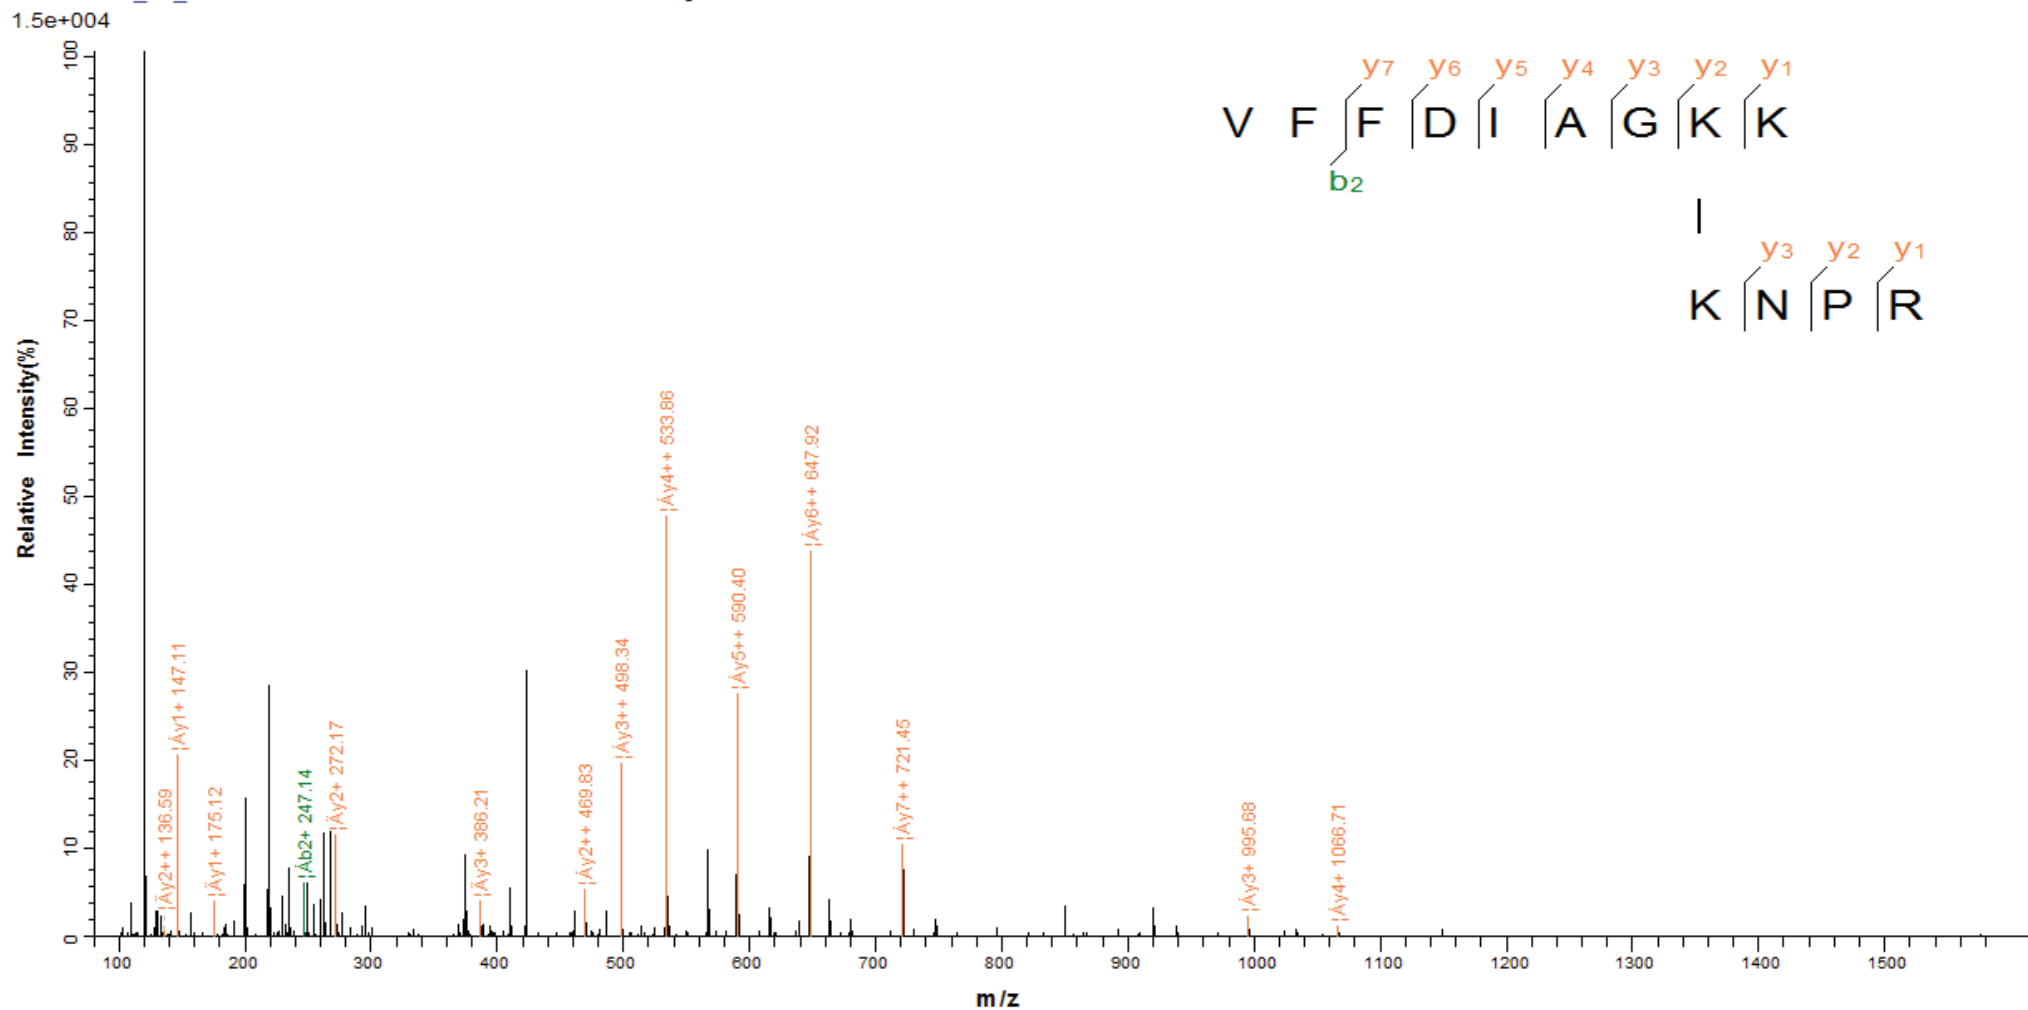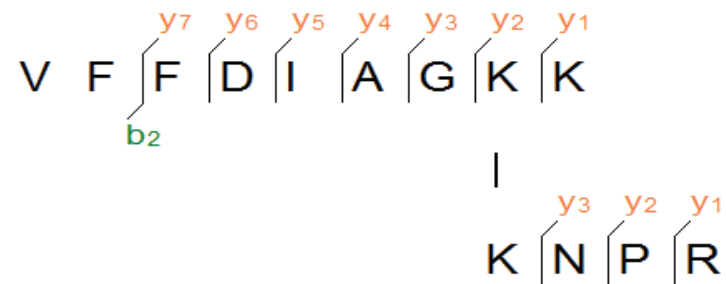



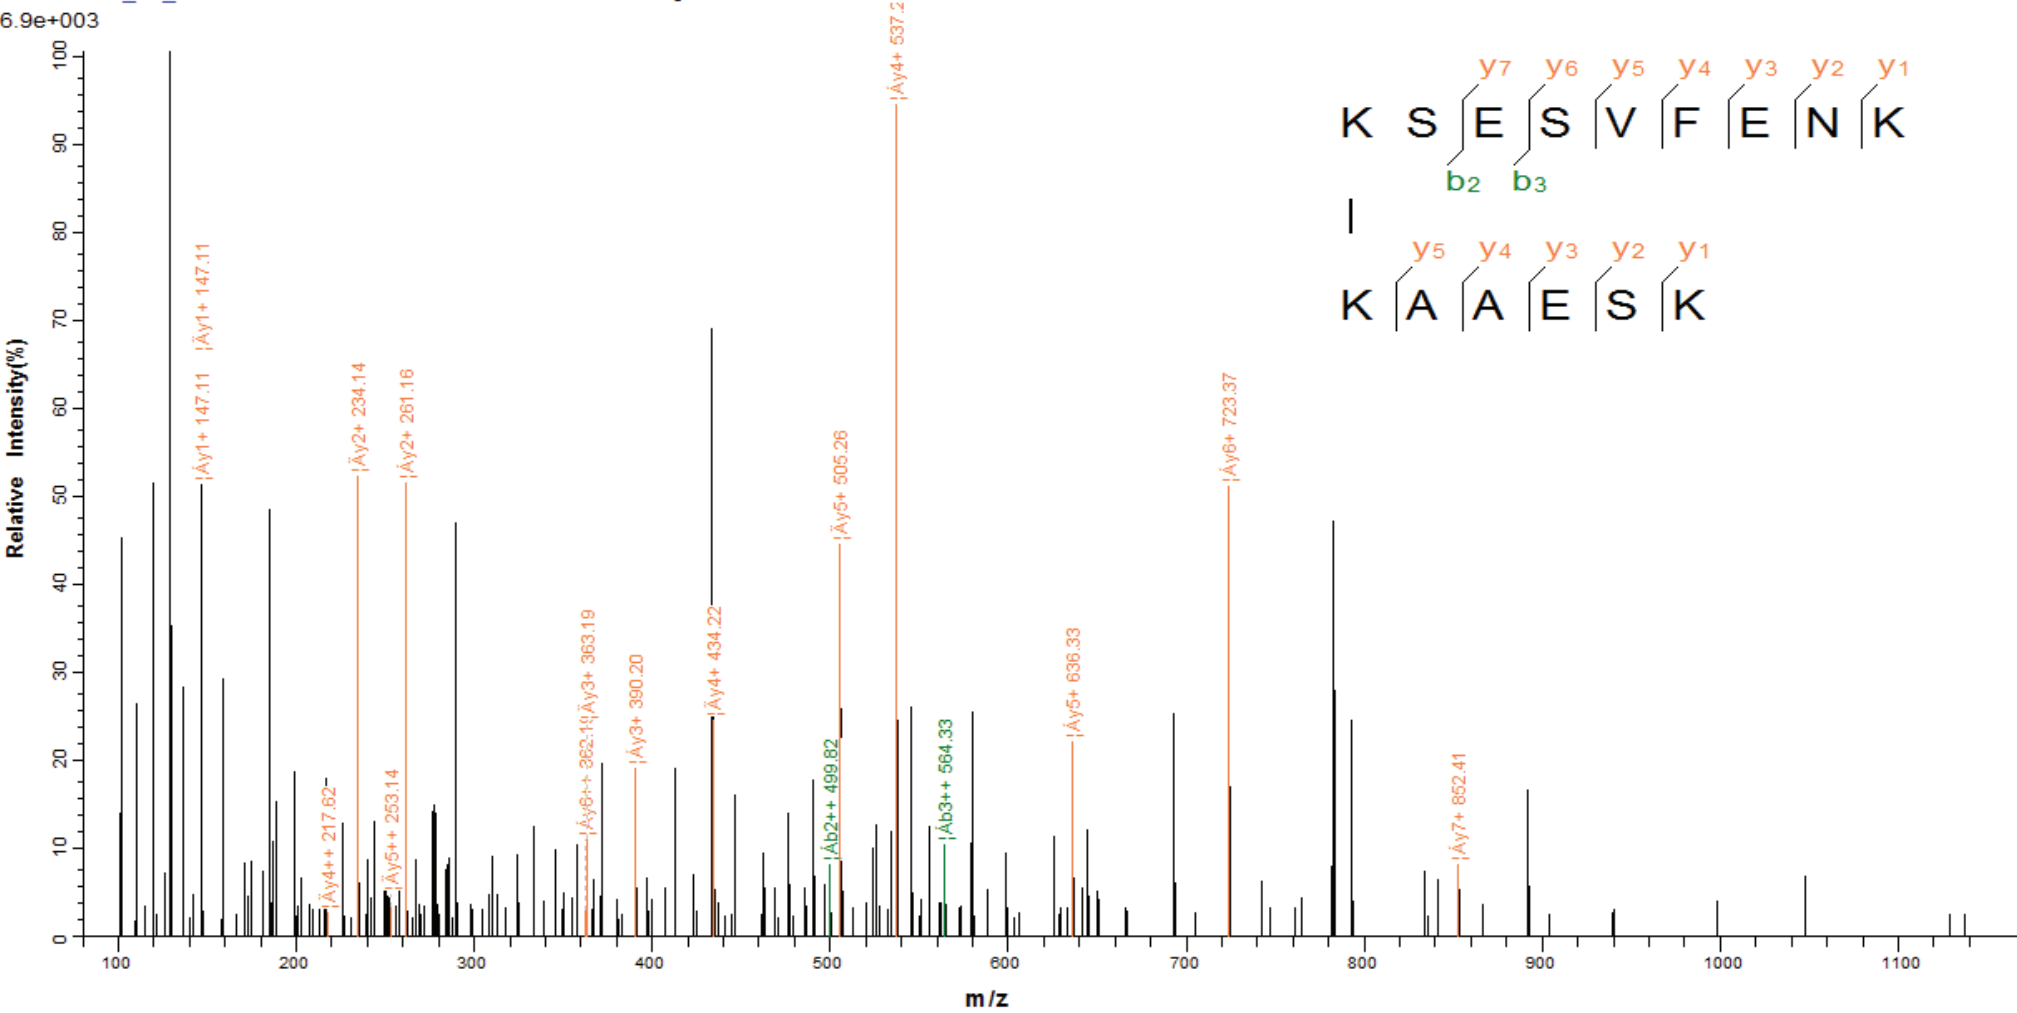

APC\_A9 140131205754.005449.005449.4.dta Seq: SSSQYNSFKAIR-ATVDLKR

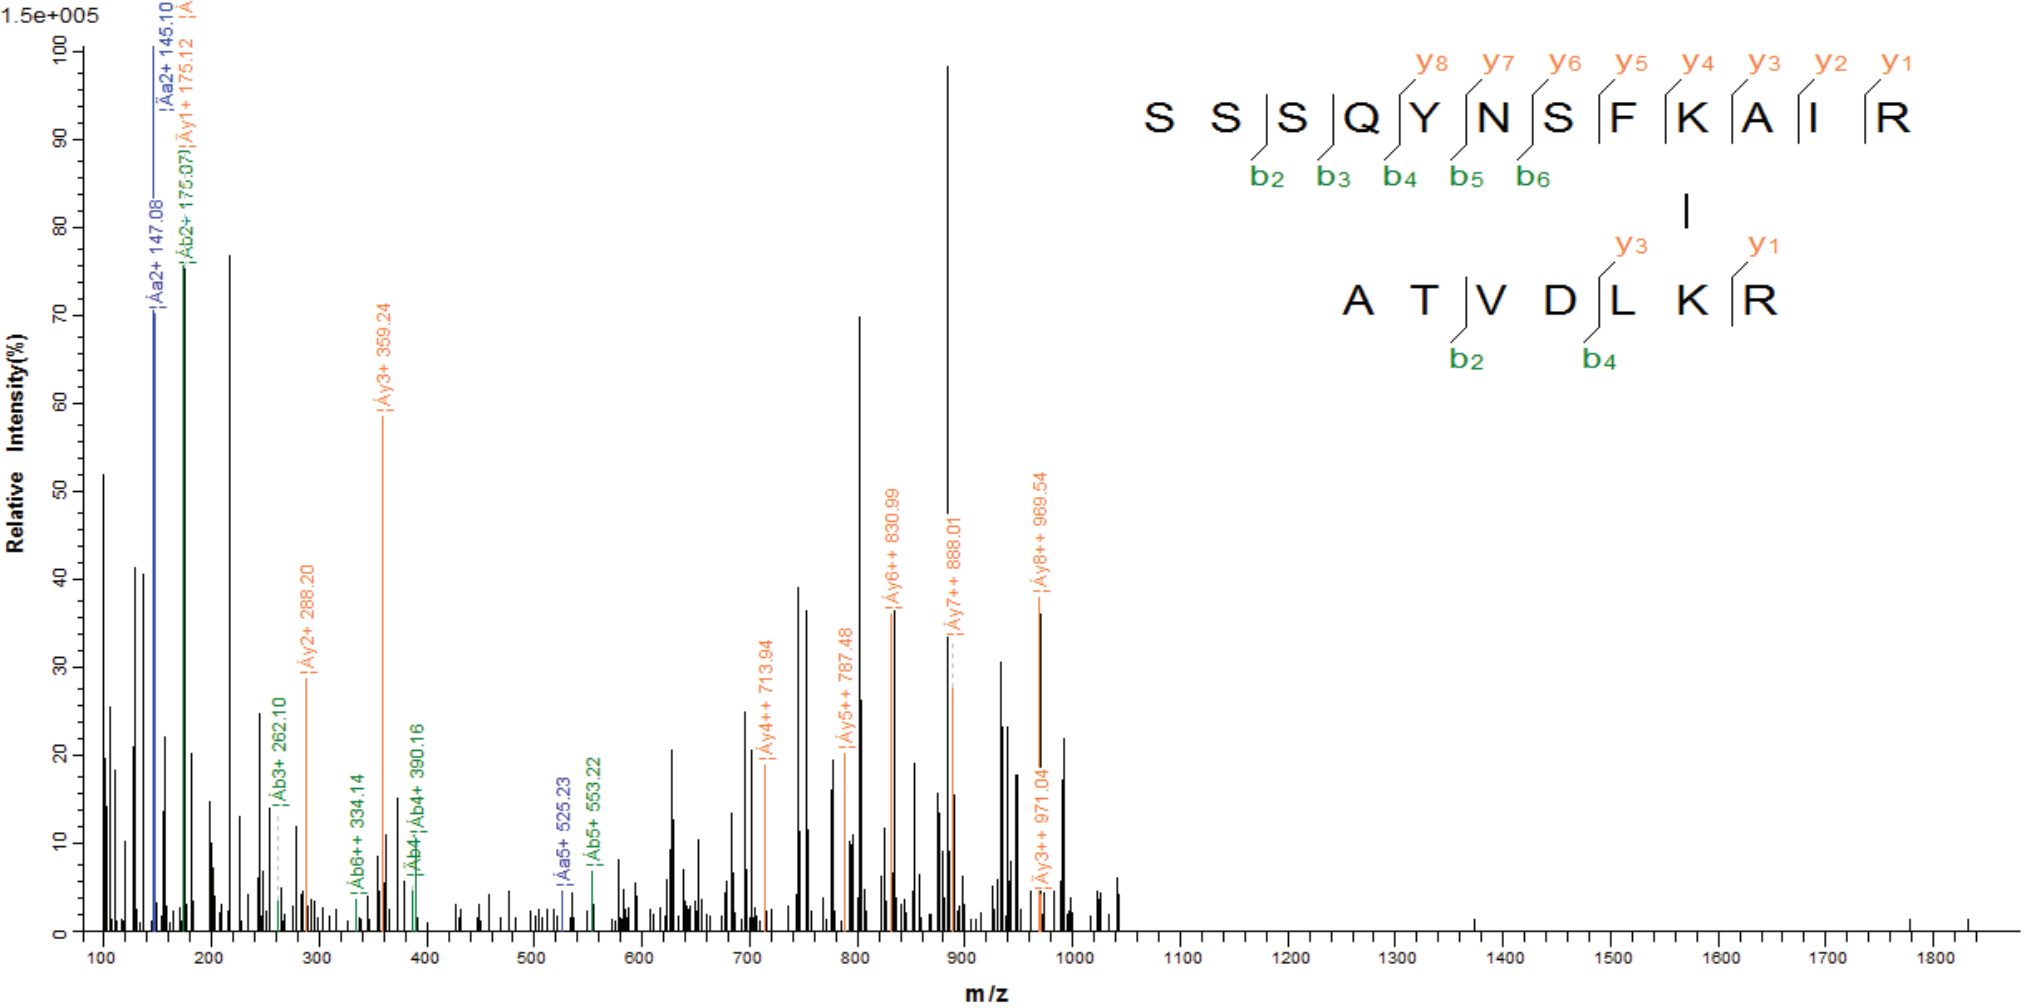



Seq: RAPTTLQLSHDDVTSLIDDLNEQKLK-QQLNIEKTK

3.4e+004

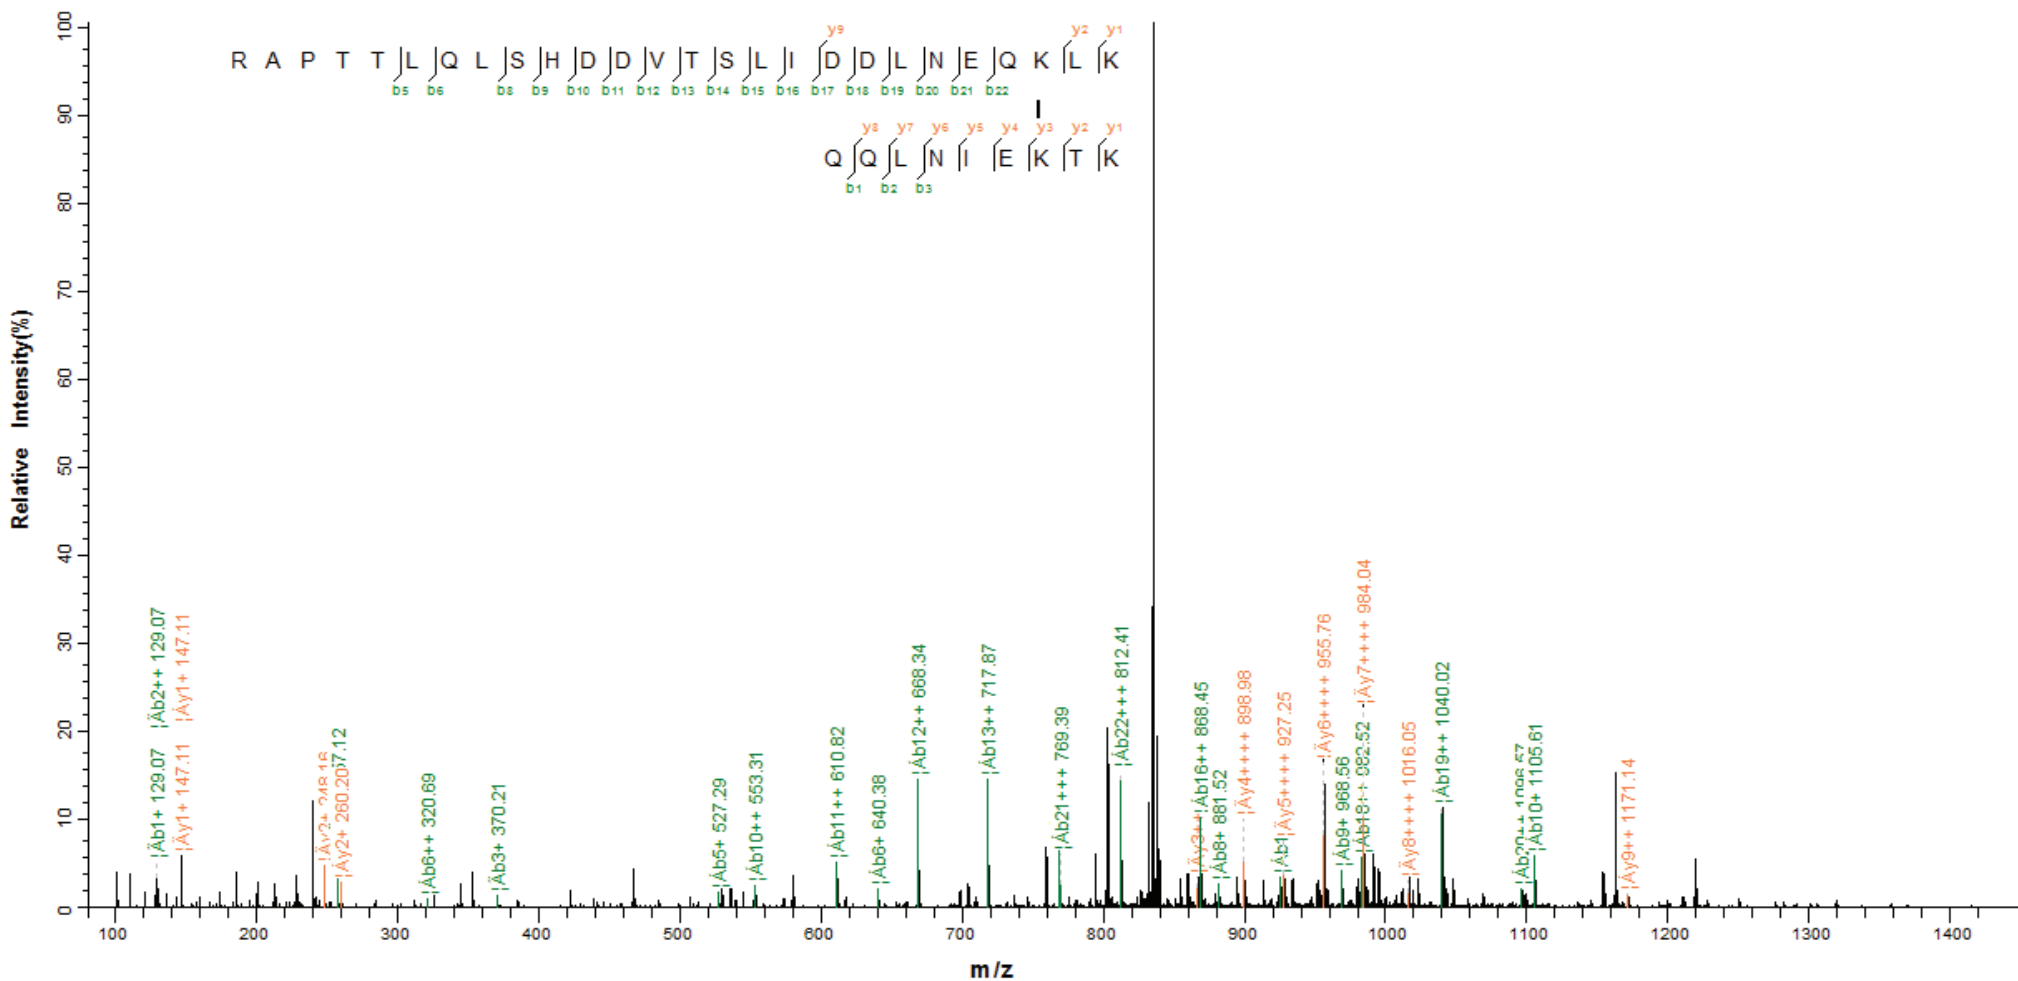



APC\_A9\_140131205754.004462.004462.4.dta Seq: SRLPKIR-KLGWNR

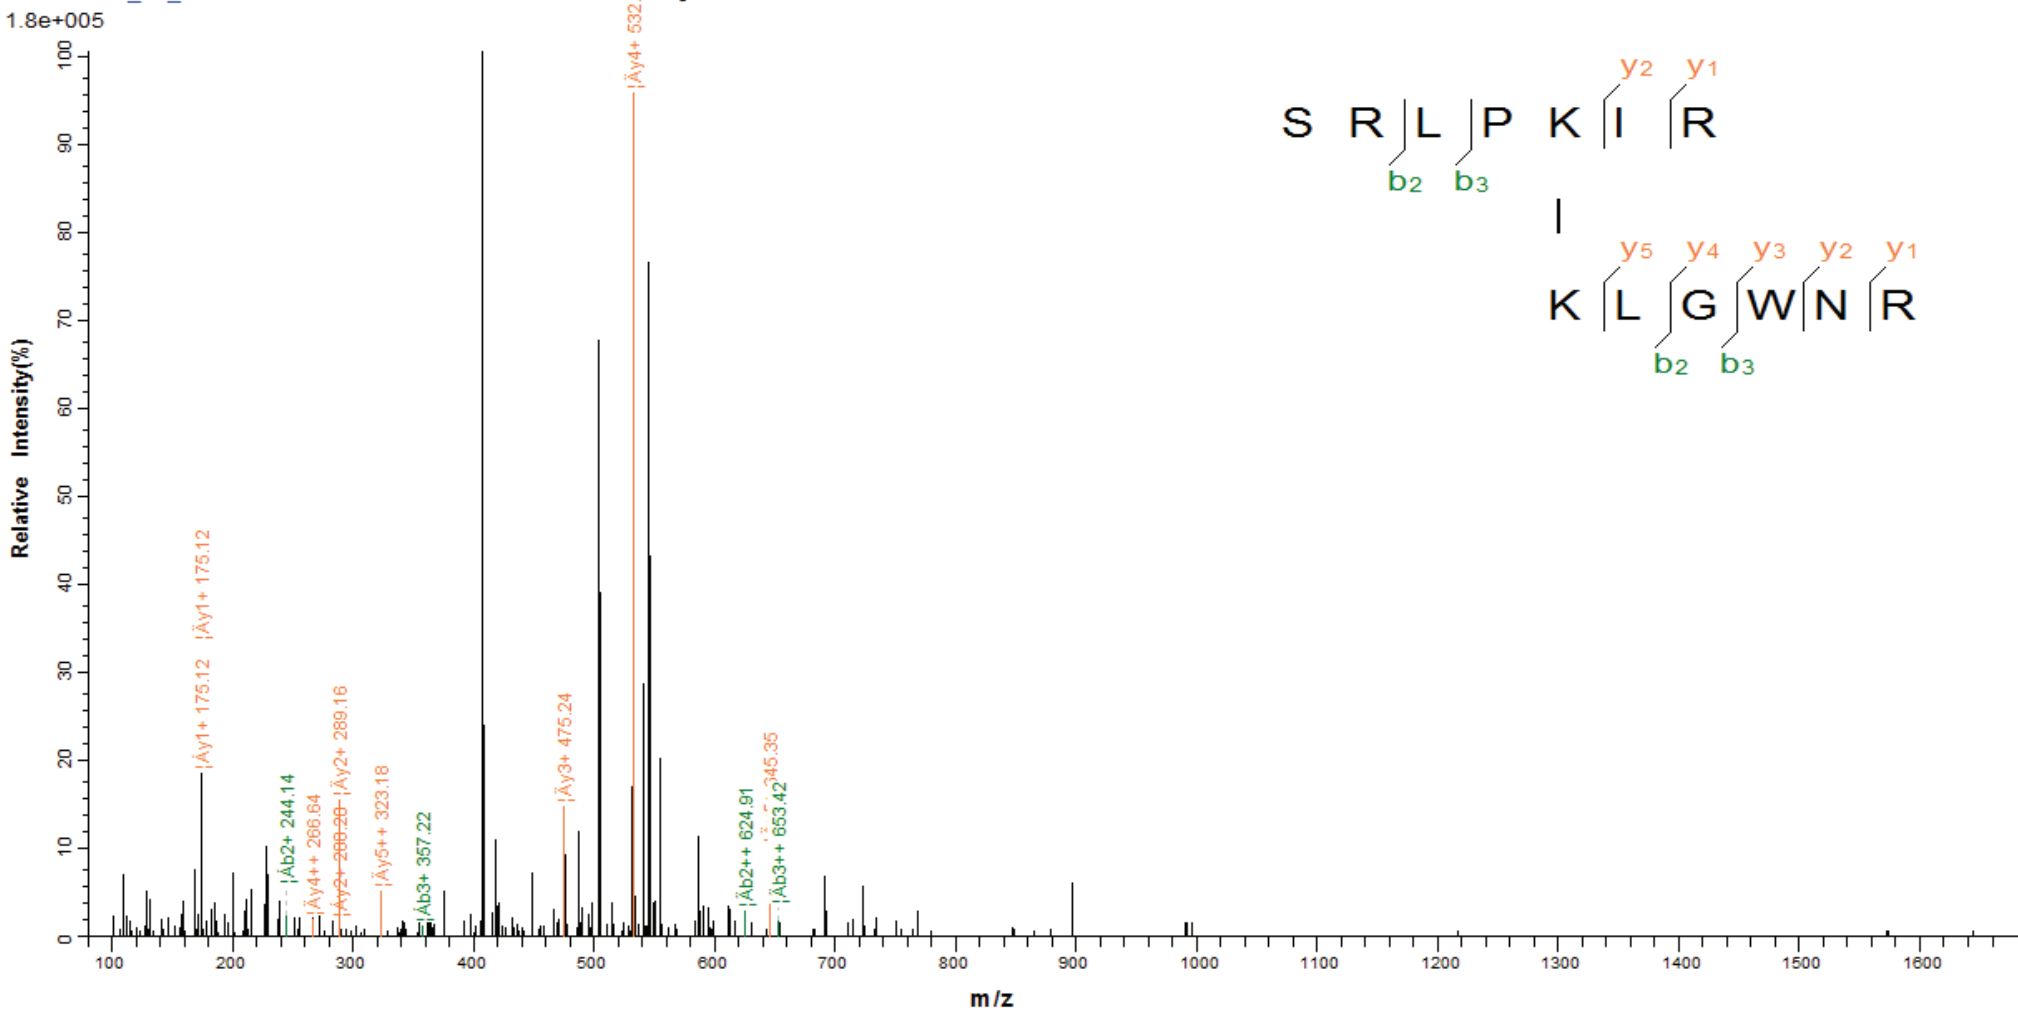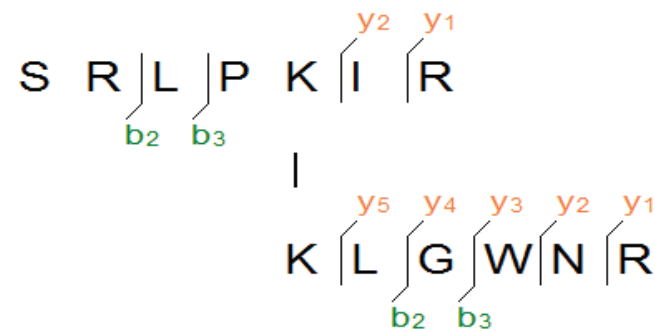

Seq: LKQQLNIEK-TRYFQ GK

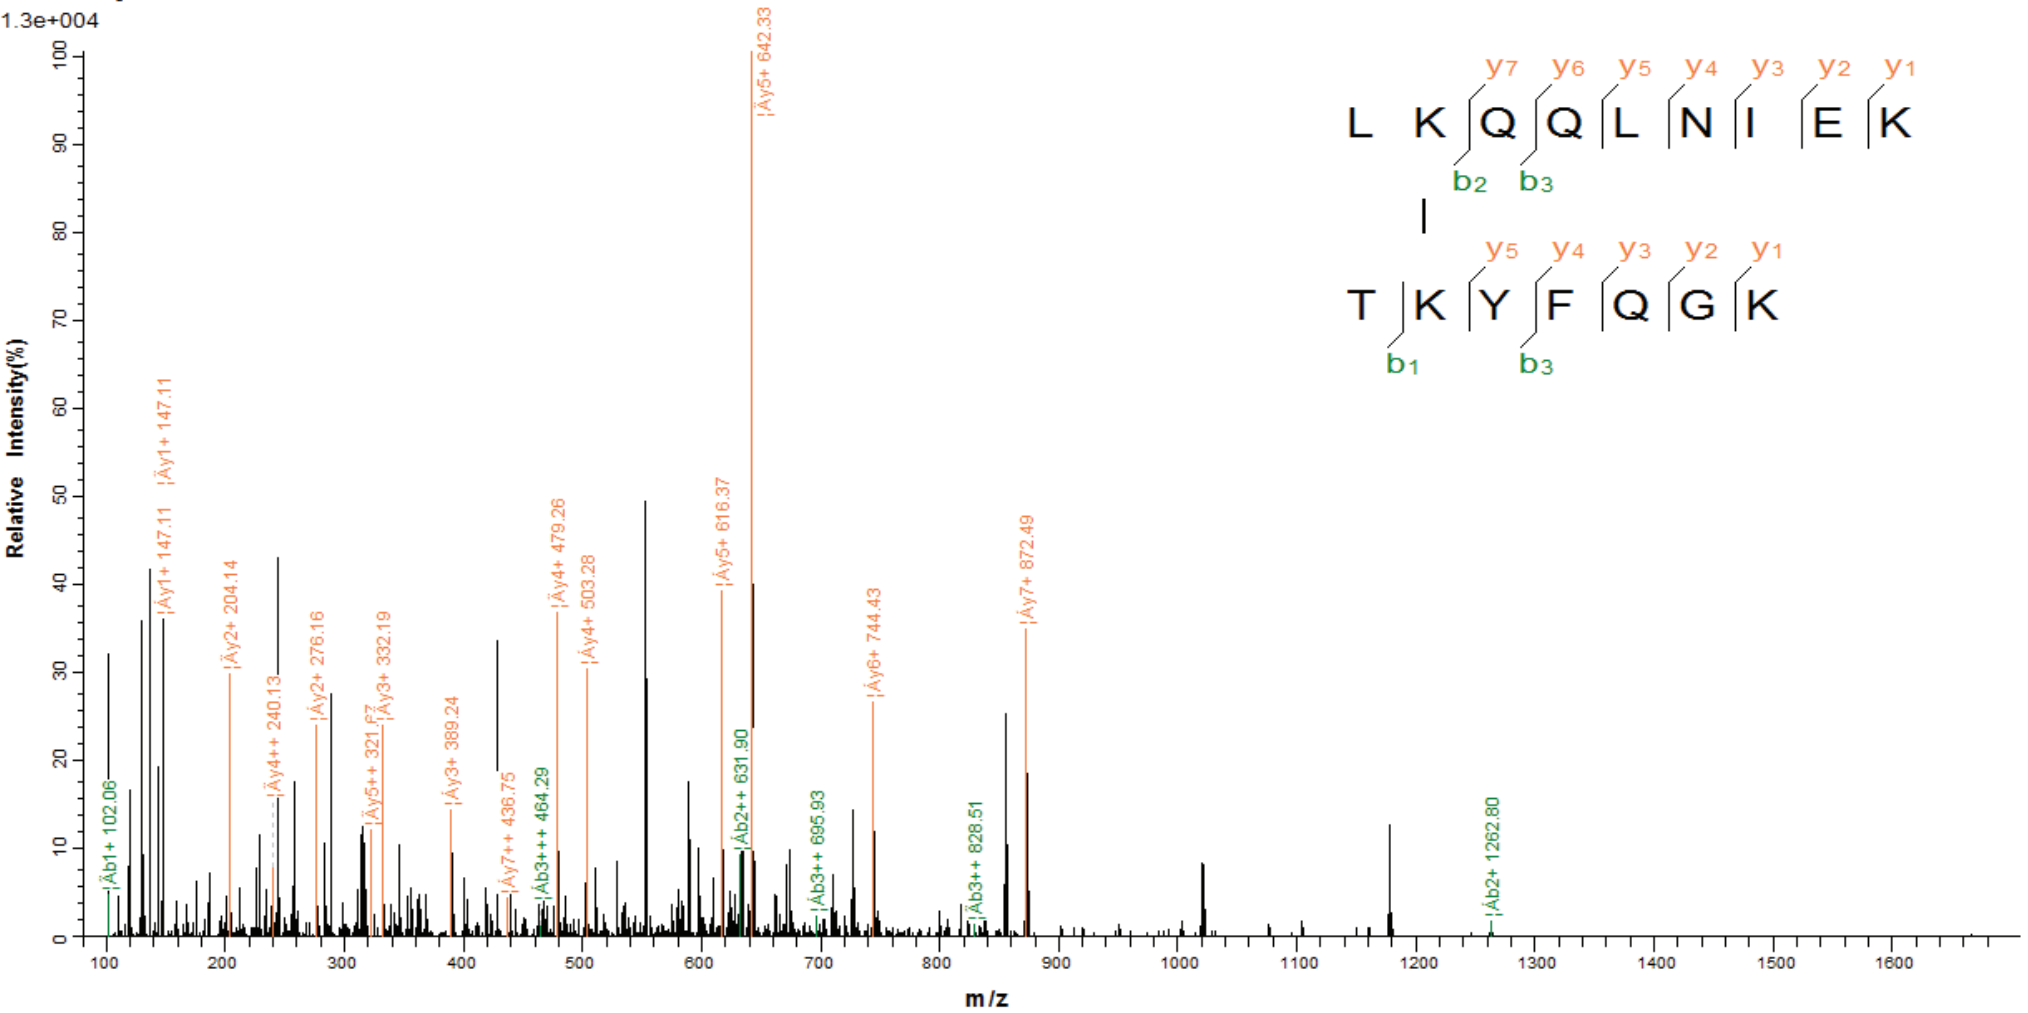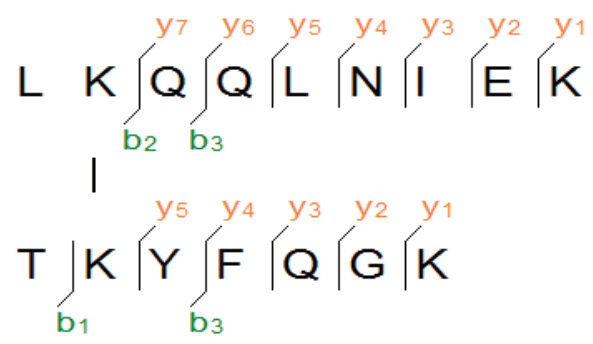

Seq: ESSVKIPALFK-SASLVFPKEK

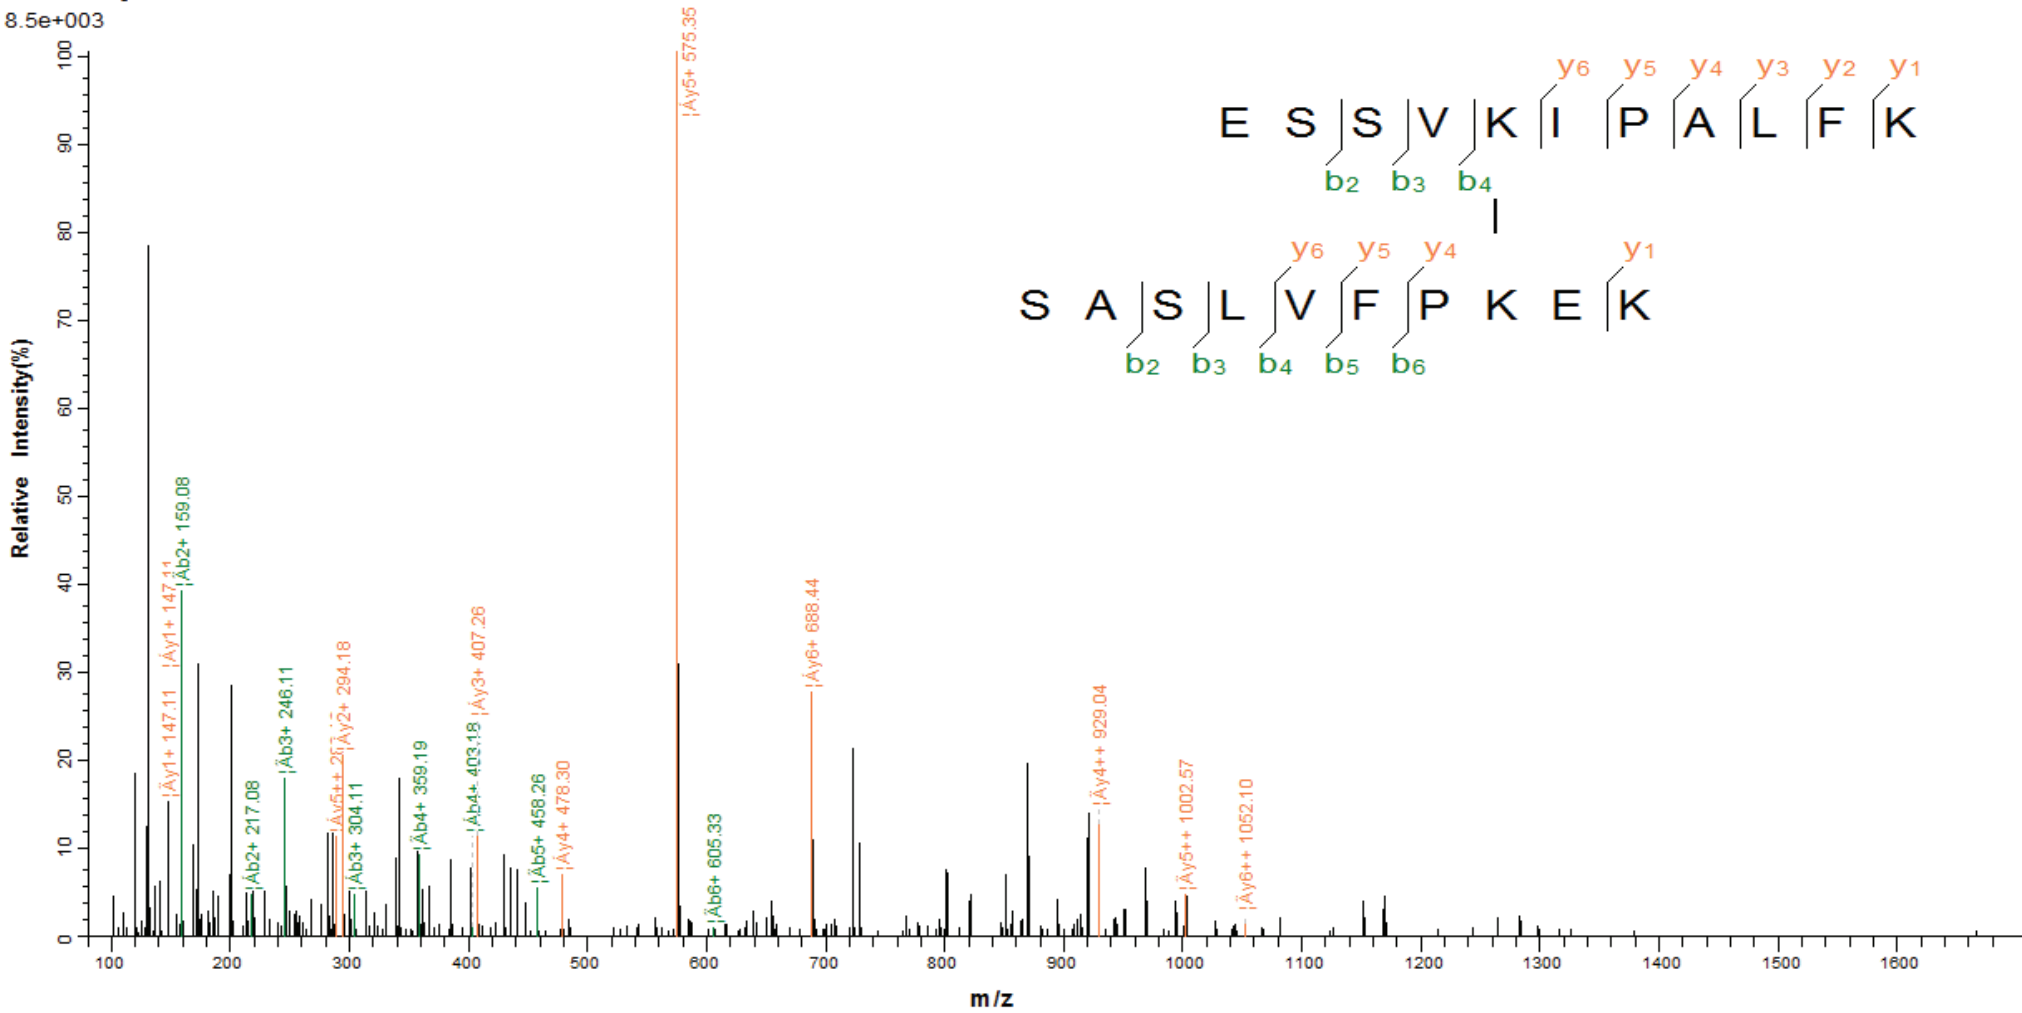



Seq: CVFFLKDVTFNPK-NKLFLLSHR Mod: 1,C\_57

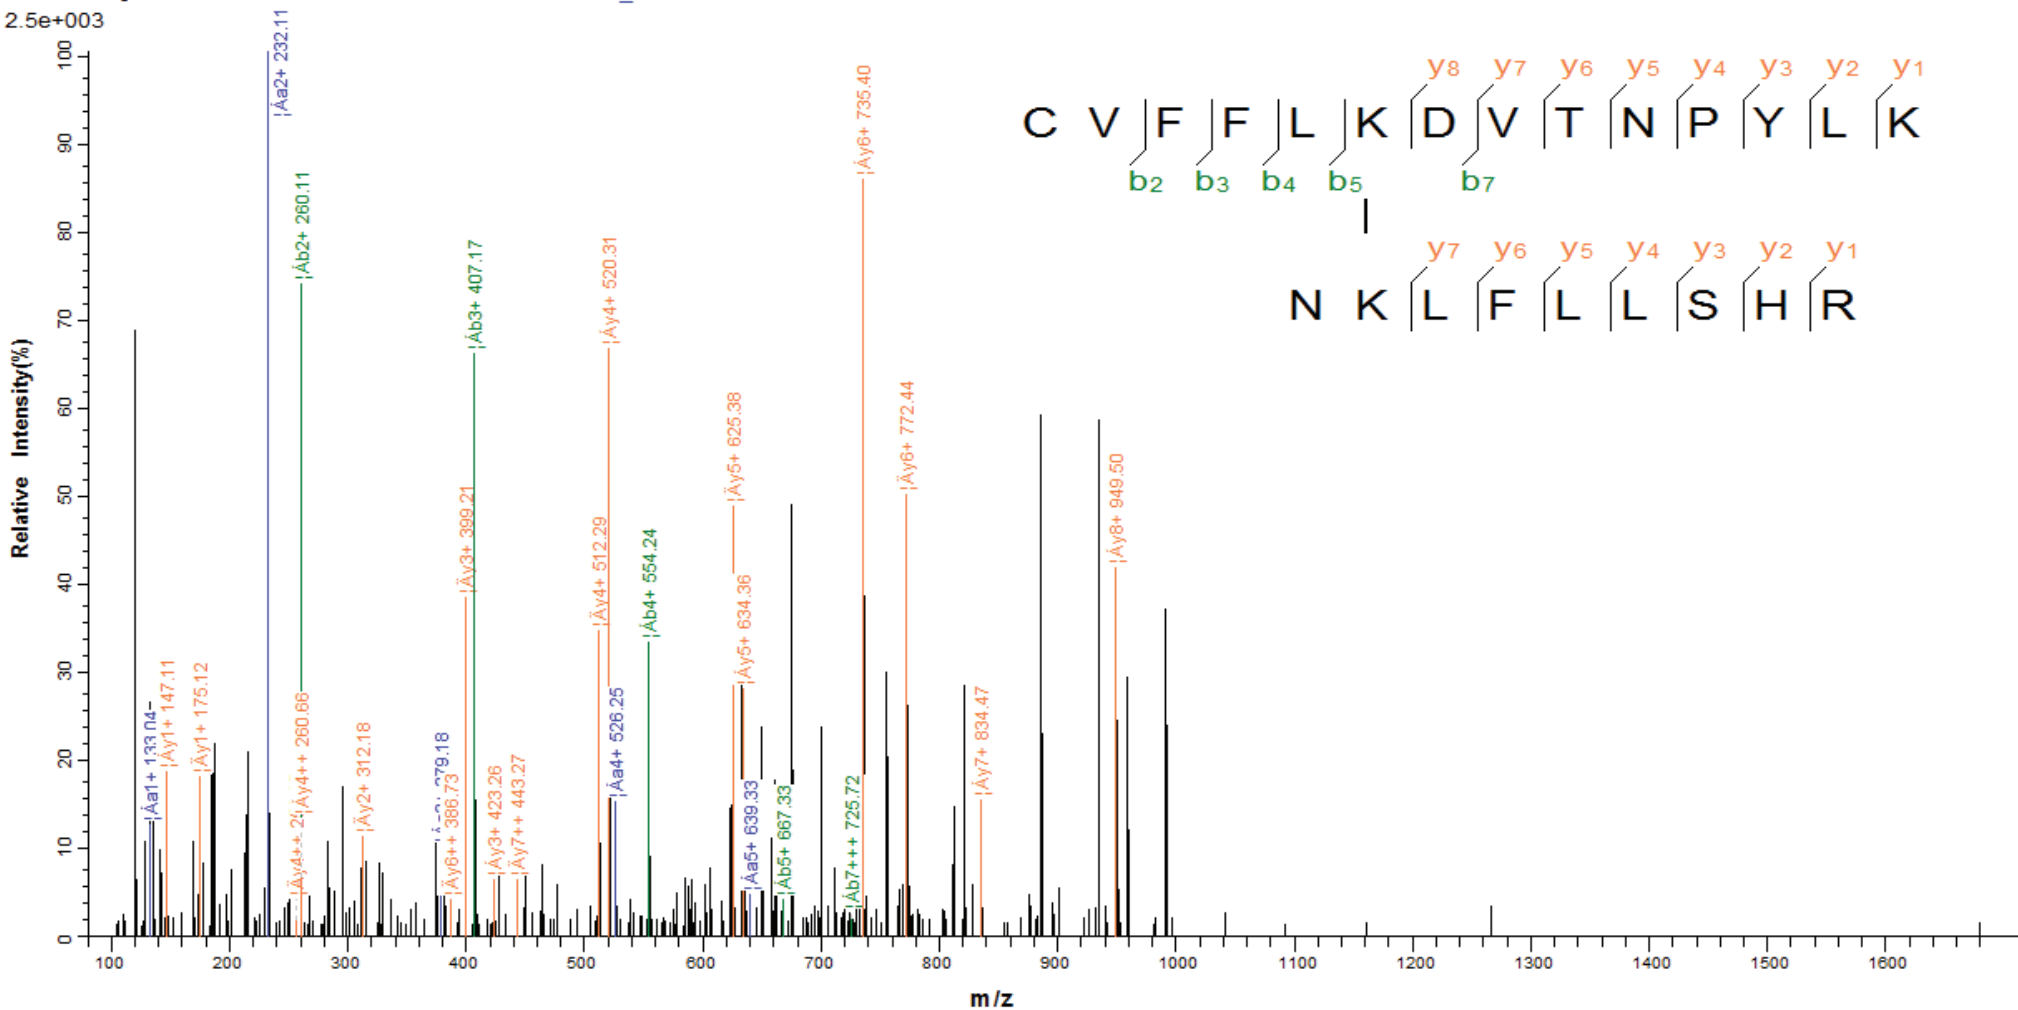

Seq: VAFKALEEDDFLK-FLSKTSSSSLR Charge: 4 MH+: 2887.5782

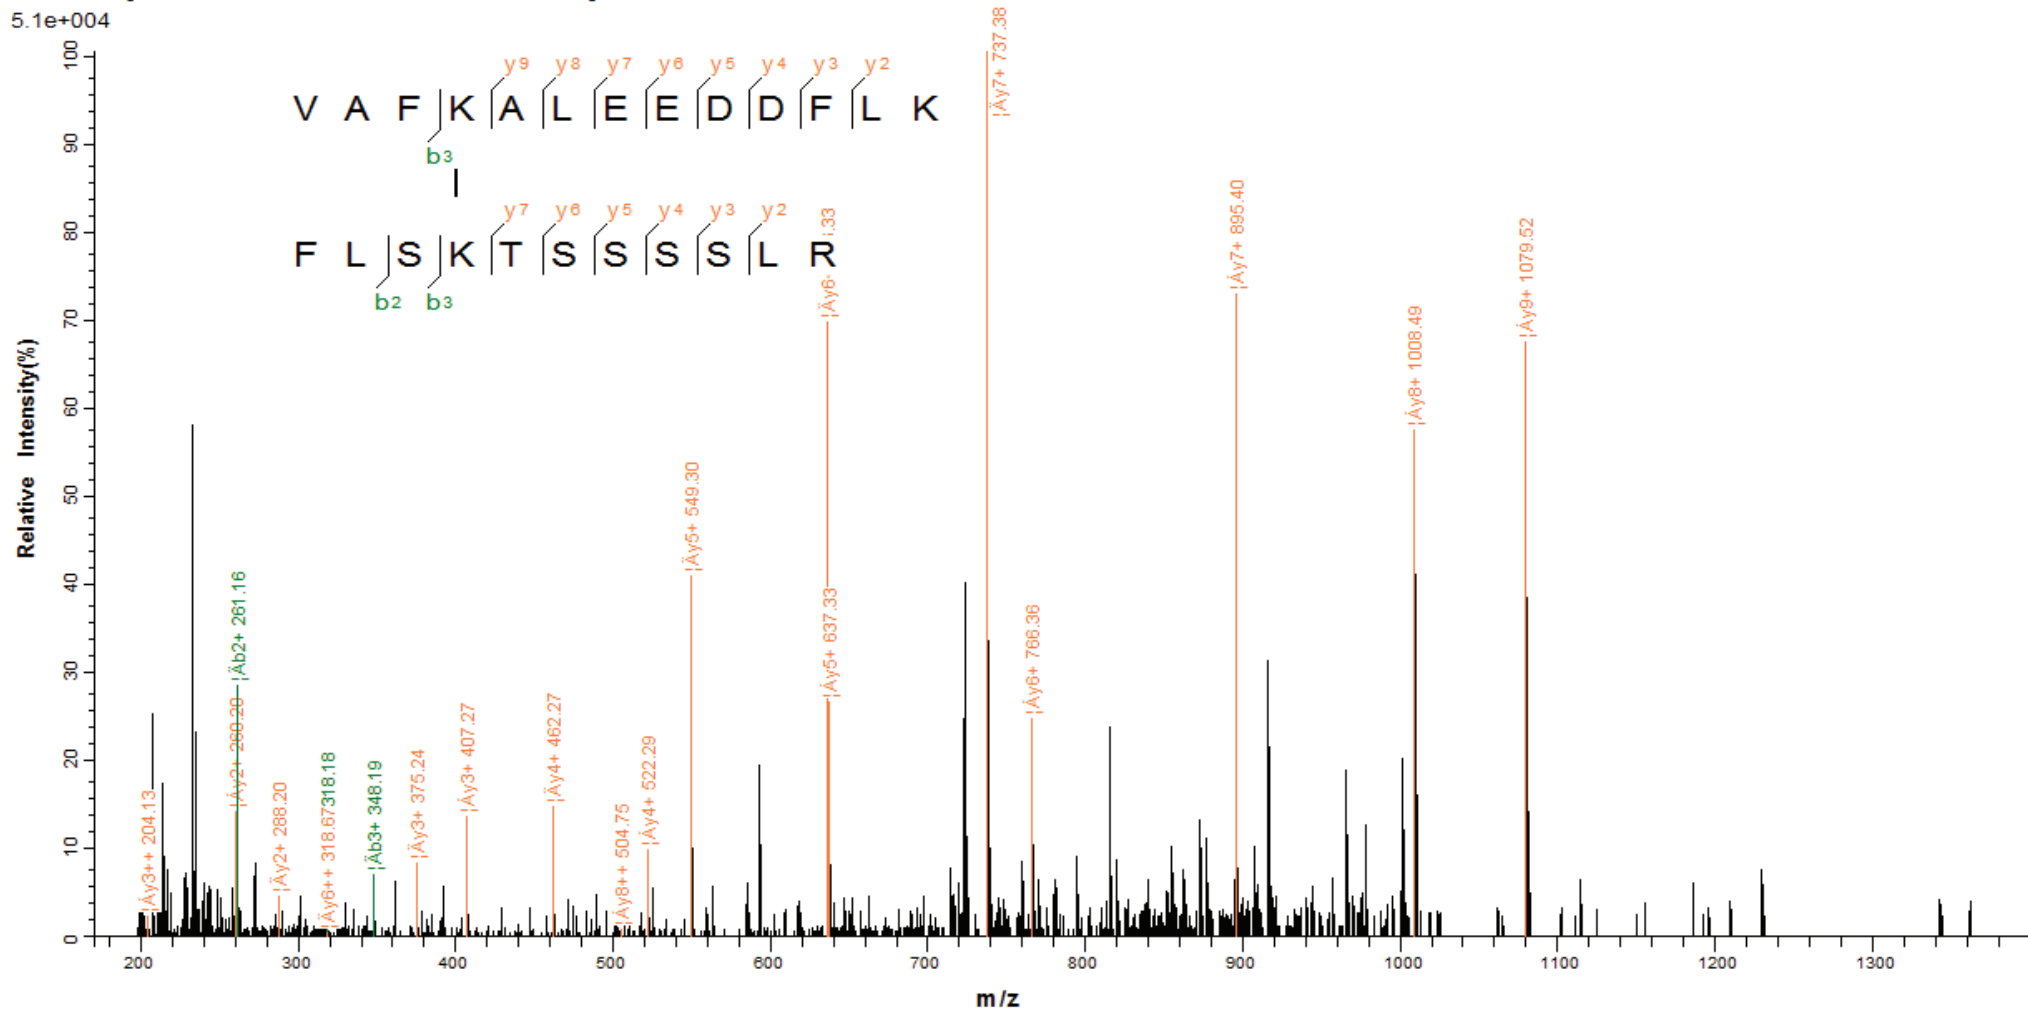

Seq: YINTEITKSNEILAK Charge: 4 MH+: 2720.4982

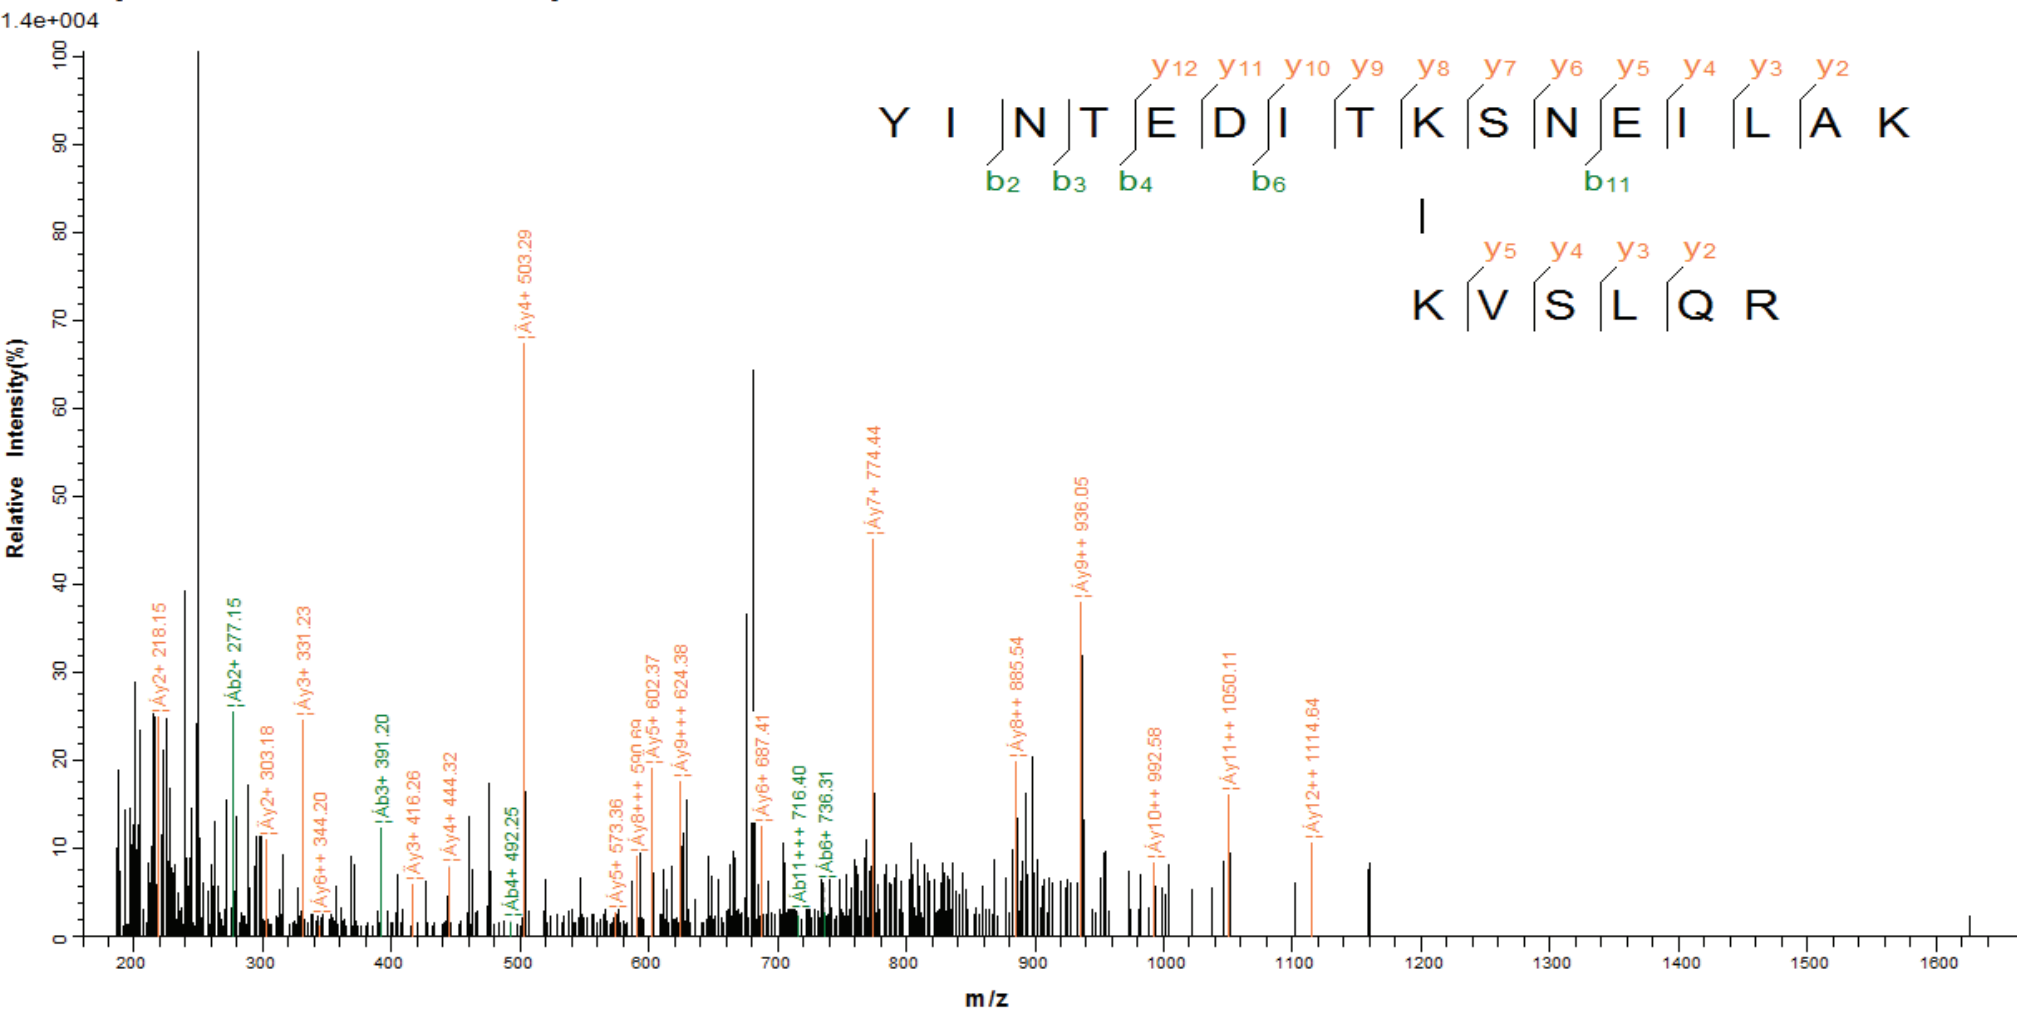

Seq: DYKLADNVDR-NLYKINLSK Charge: 4 MH+: 2649.4982

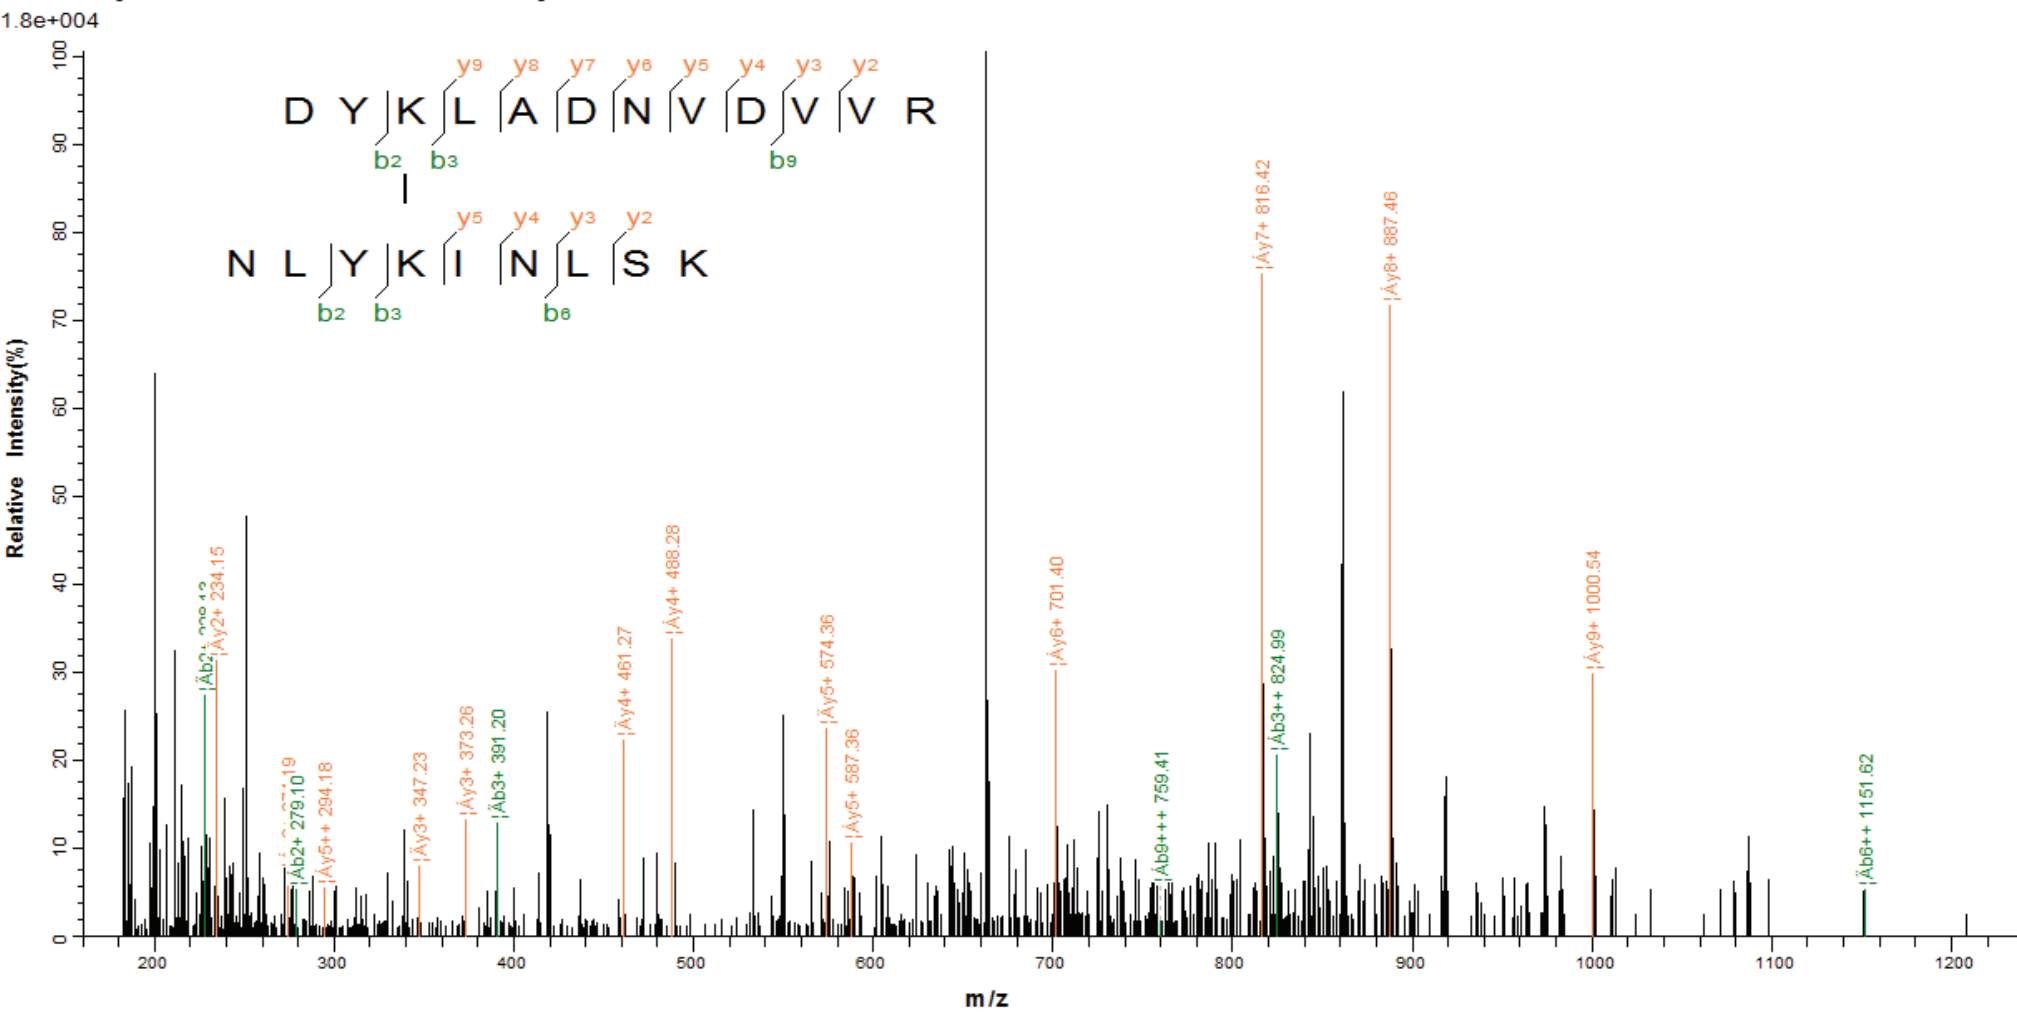

PC\_A8\_140201121226.003158.003158.5.dta Seq: KLNENEIAIKCFR-KYLKK Mod: 11,C\_57

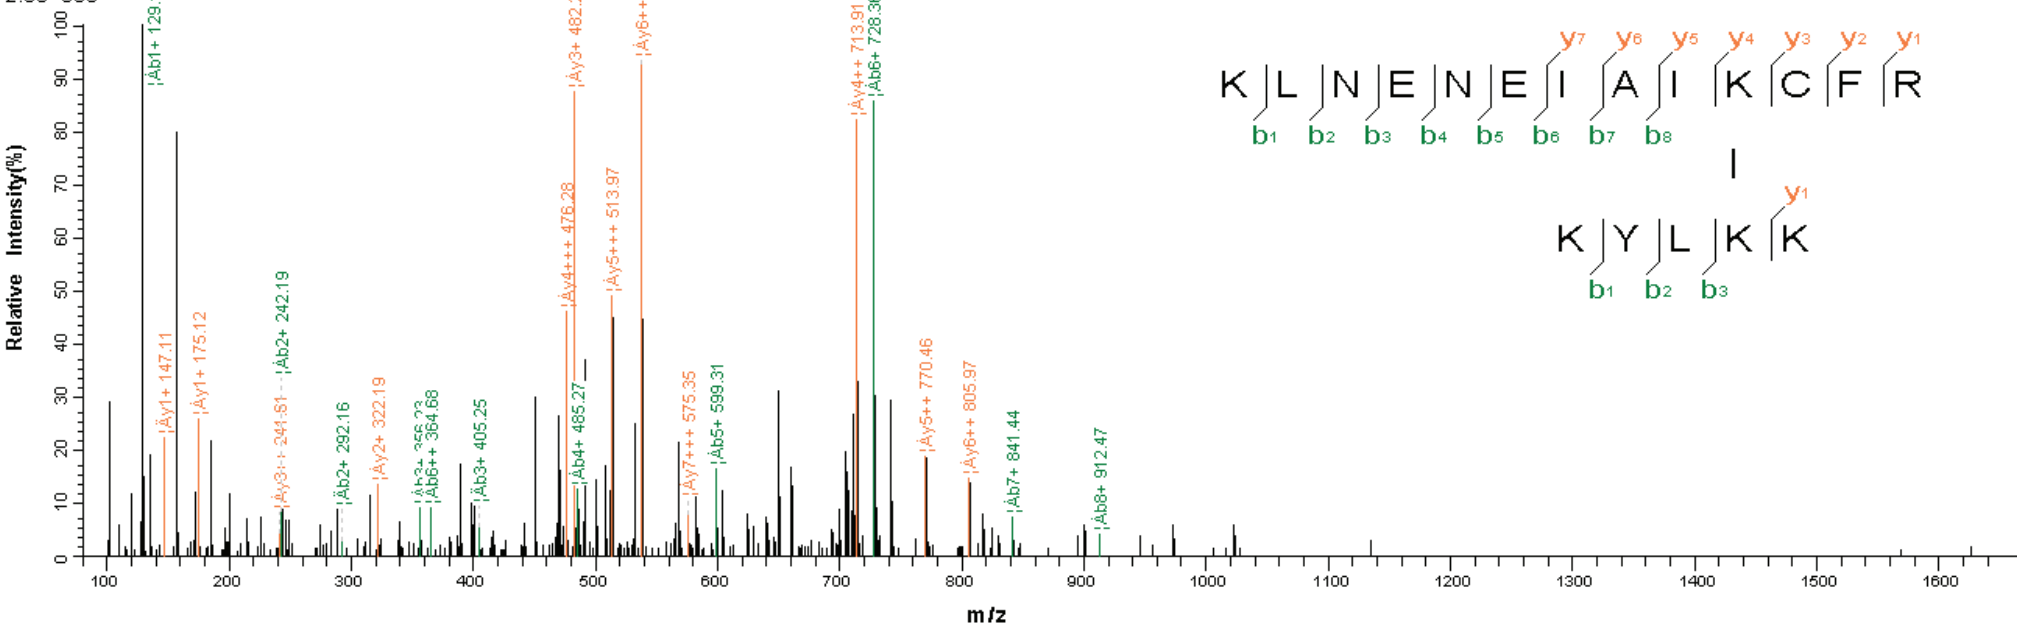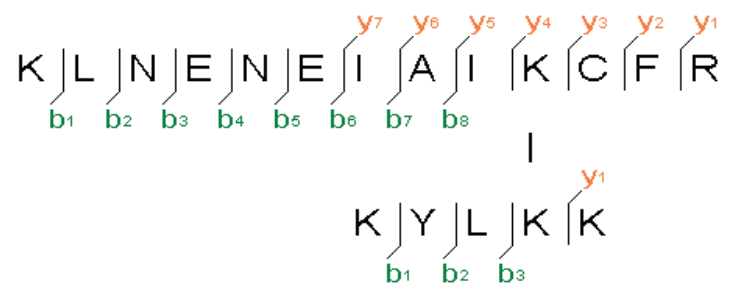

PC\_A8\_140201121226.003502.003502.5.dta Seq: HNSAQEPFSEENKKK-IPALFKYSR Score: 9.99e-006

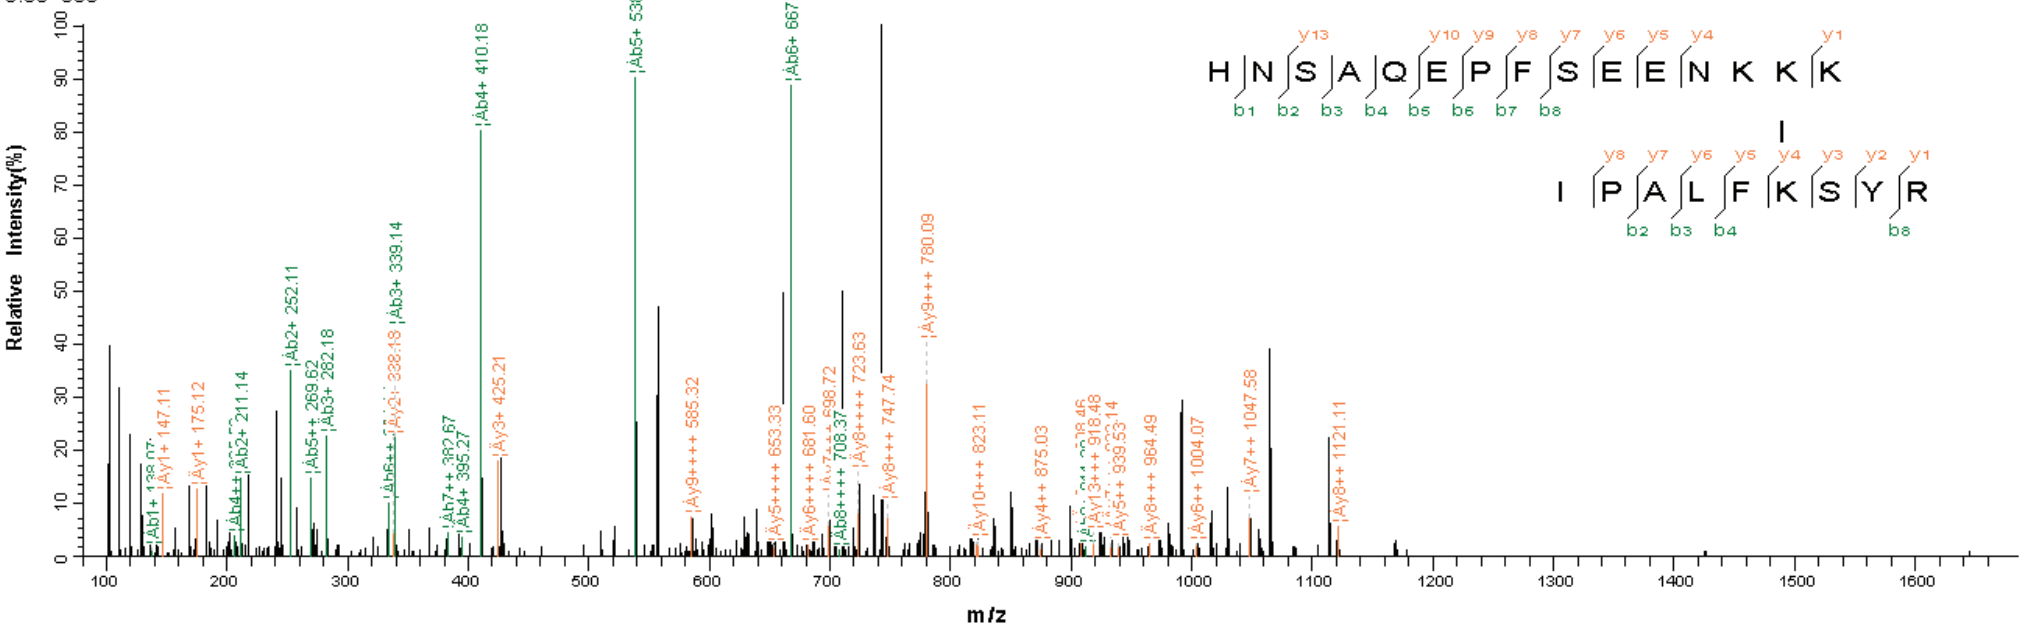

PC\_A8\_140201121226.008004.008004.4.dta Seq: KPSDIYSILSEIVK-VPLAKNR

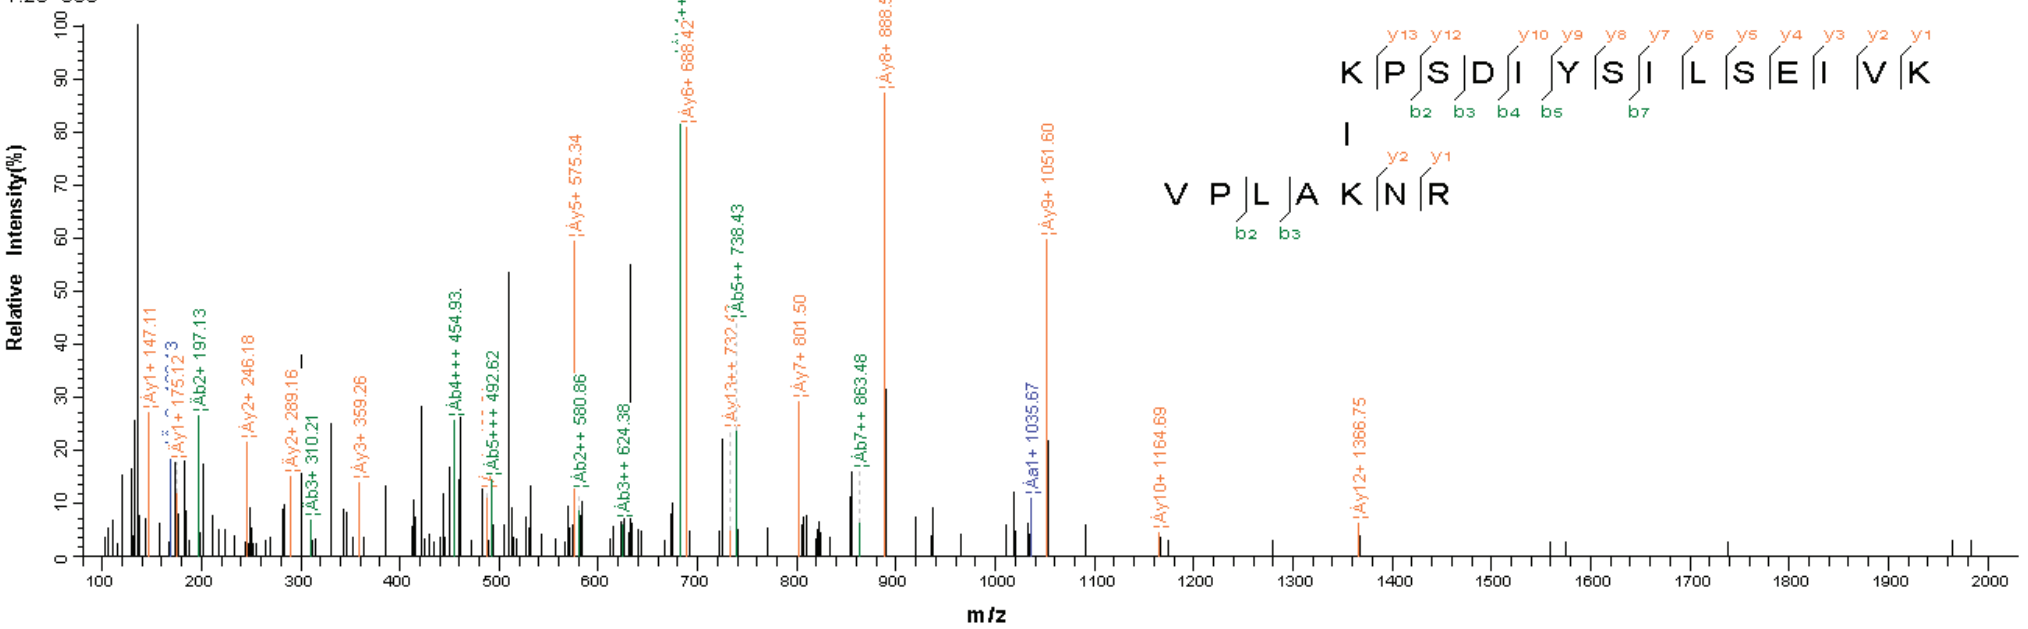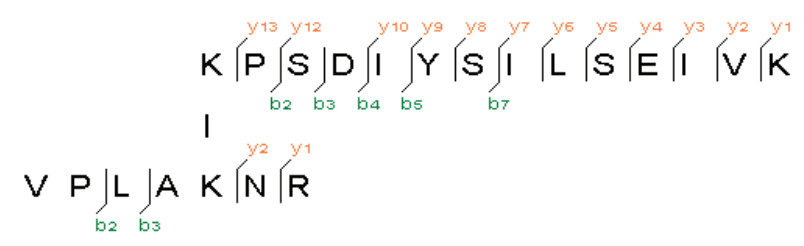

APC\_ingel\_06242014\_A7.7205.7205.4.dta

Seq: YINTEIDITKSNELIAK

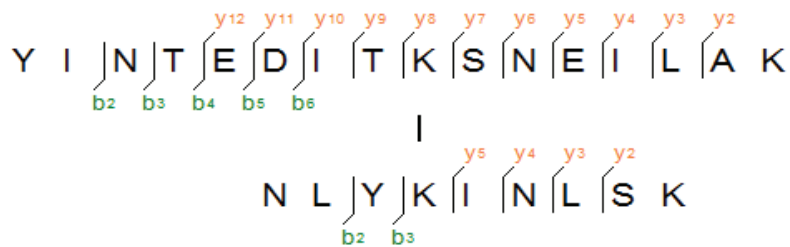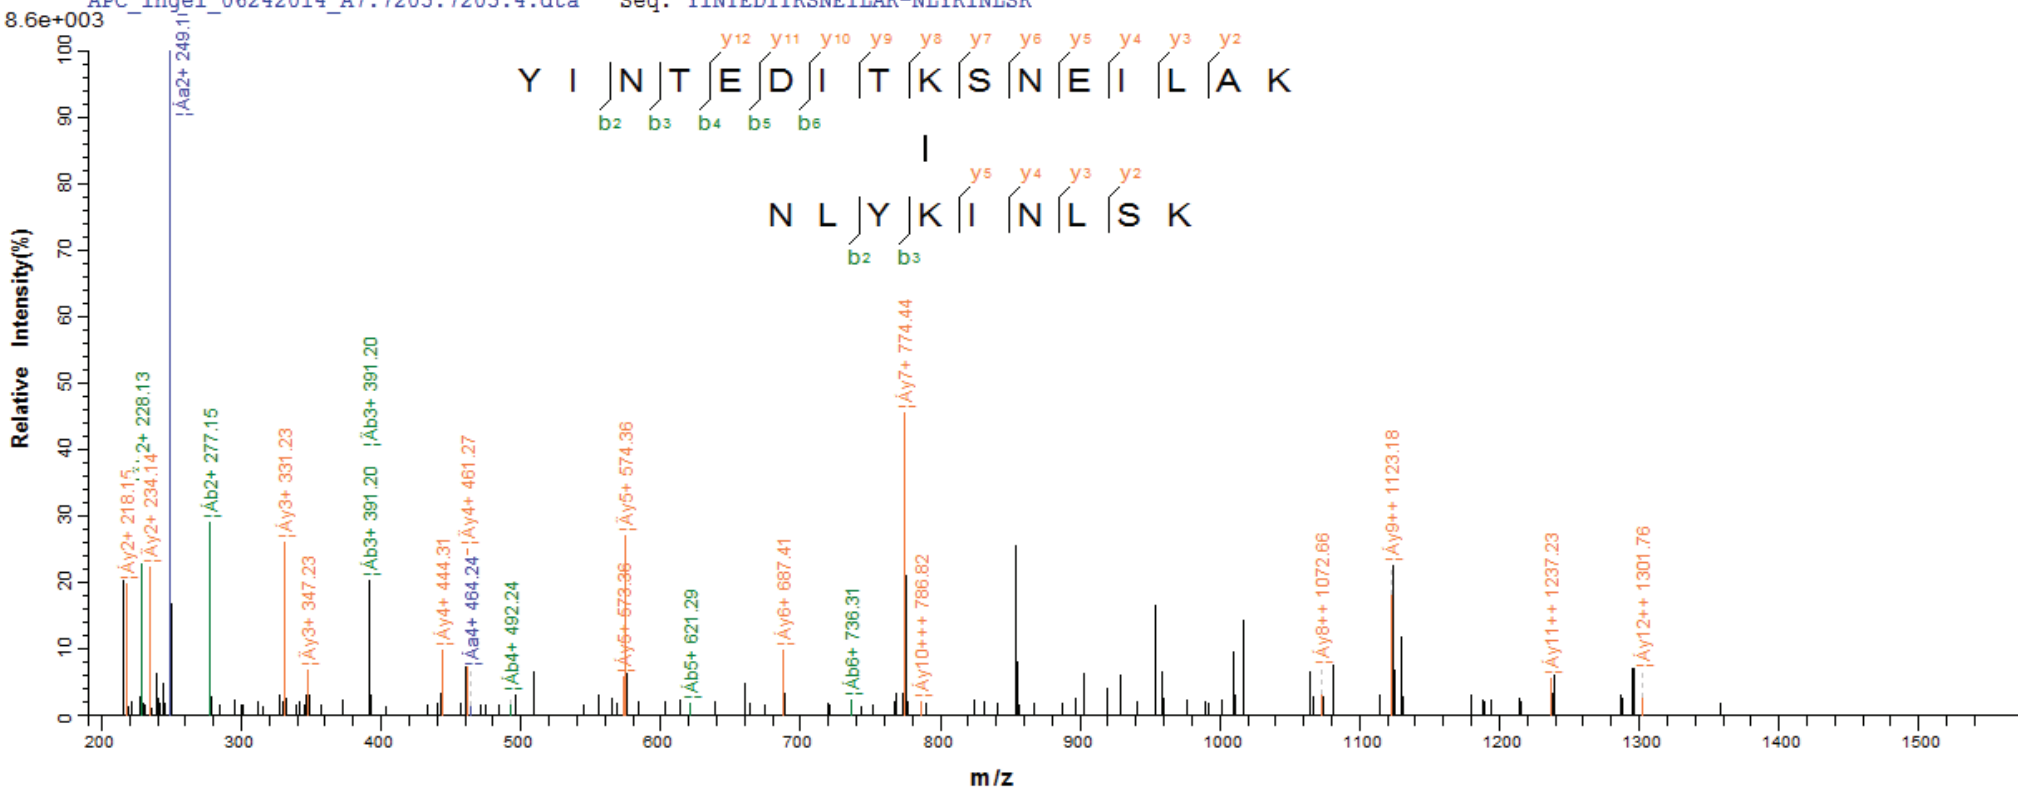



PC\_A8\_140201121226.006969.006969.4.dta Seq: SPFLWNLKVK-ELNKDLPIR

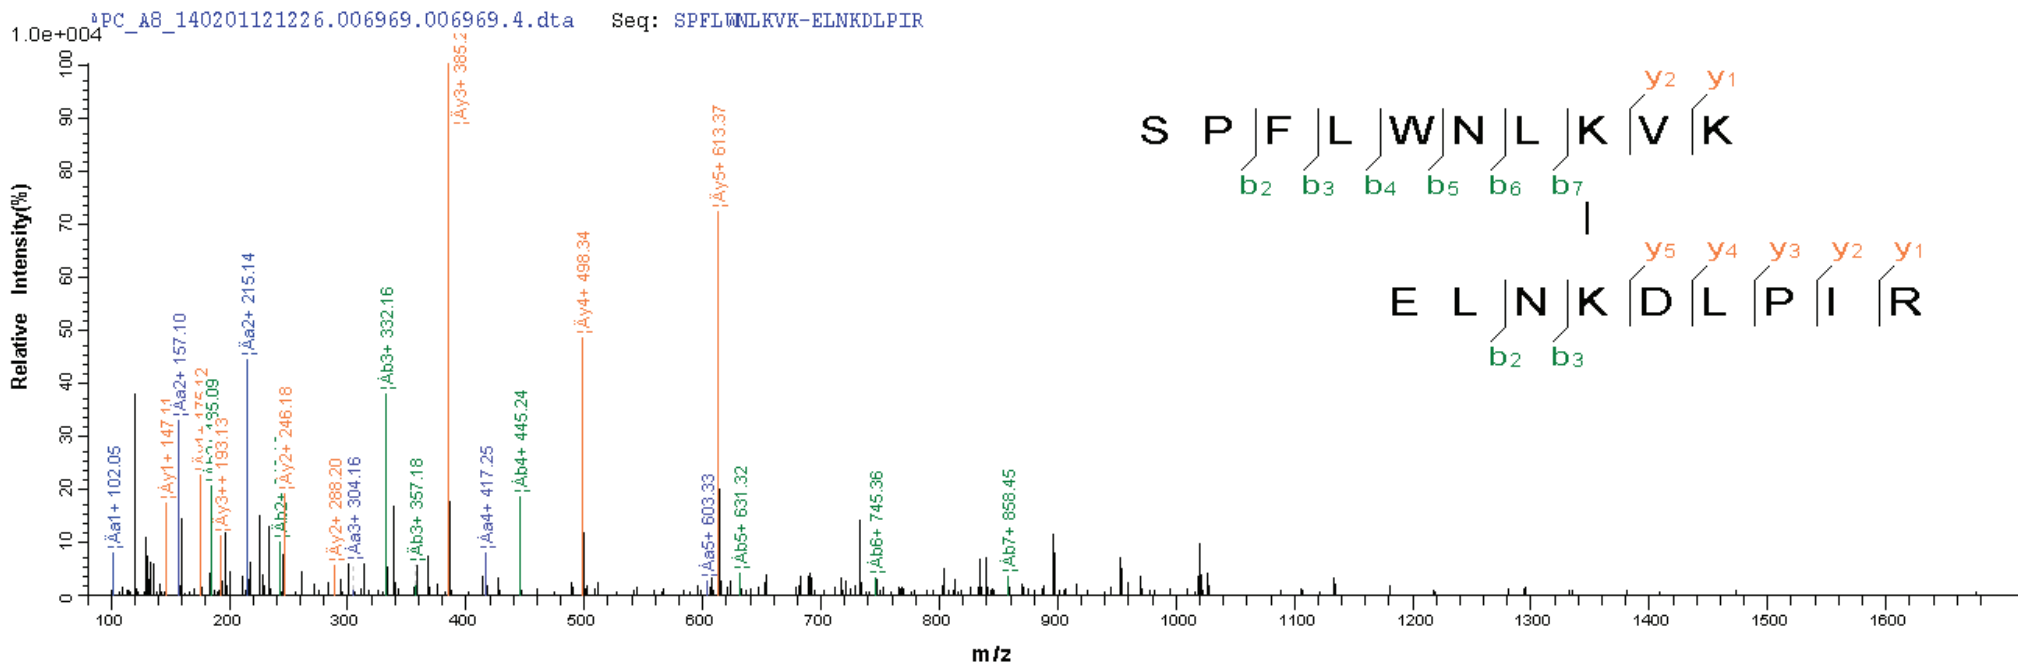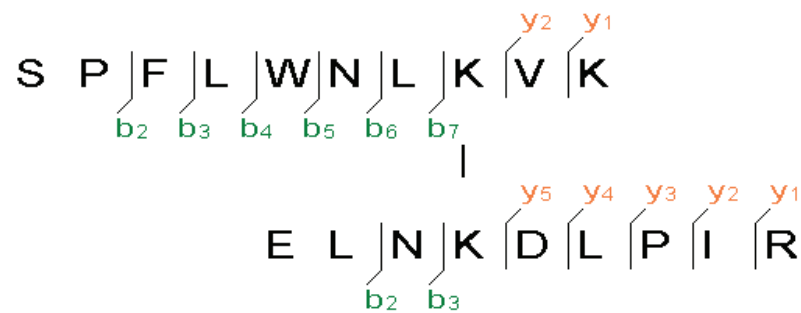

APC\_ingel\_06242014\_A8.6110.6110.4.dta Seq: GKIYFAQNNFNK-YLLGLSFVKLQR

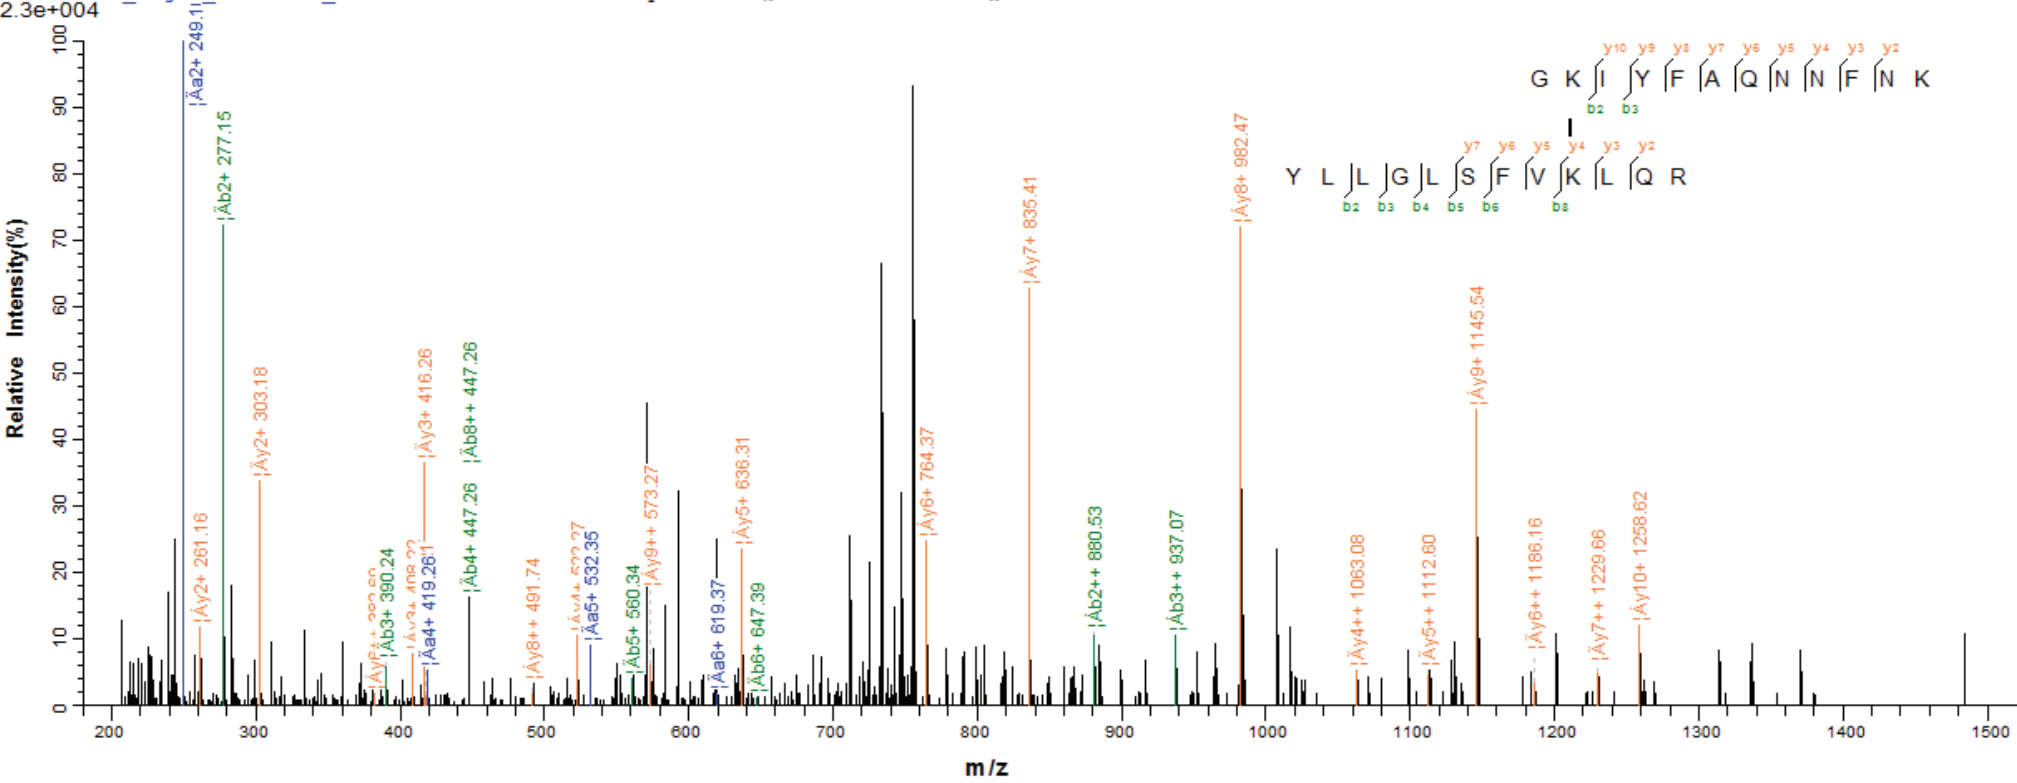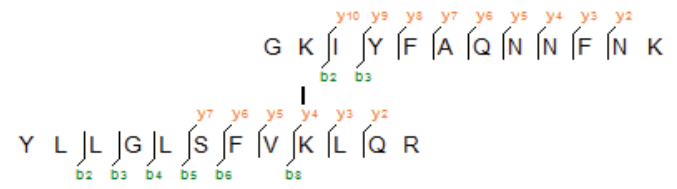

PC\_A8\_140201121226.005973.005973.4.dta Seq: SESVFENKASFR-ILEDKLSSEVR

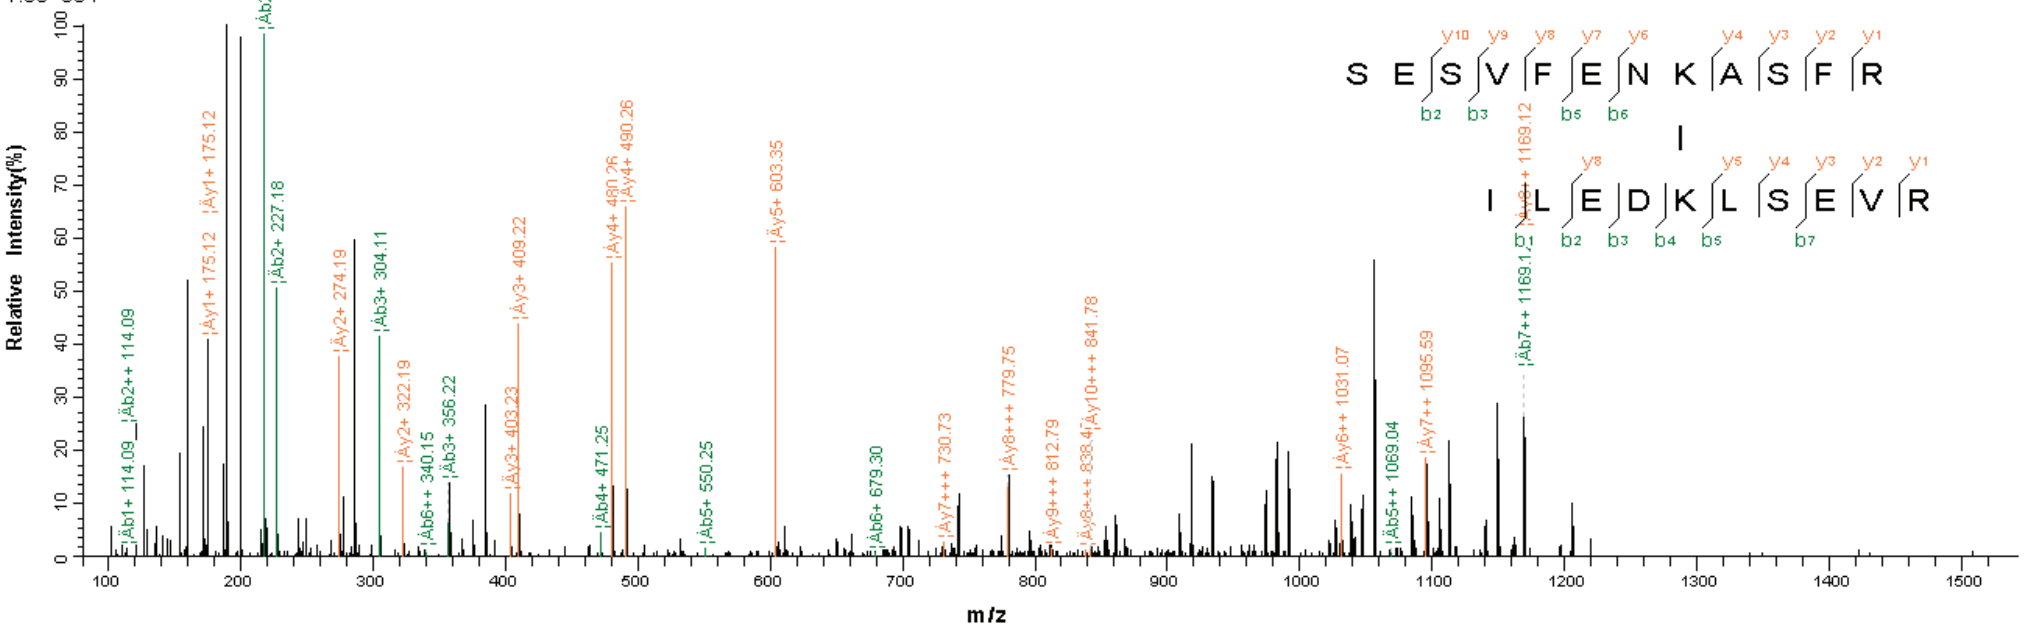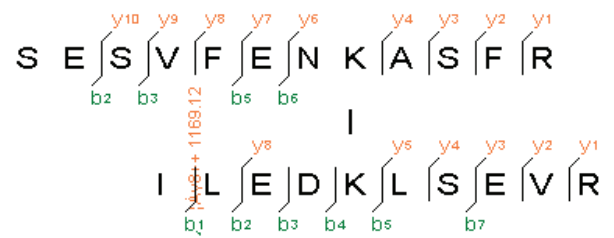



PC\_A8\_140201121226.004072.004072.6.dta Seq: TVFKHTPLWLR-FKDNVHIQK

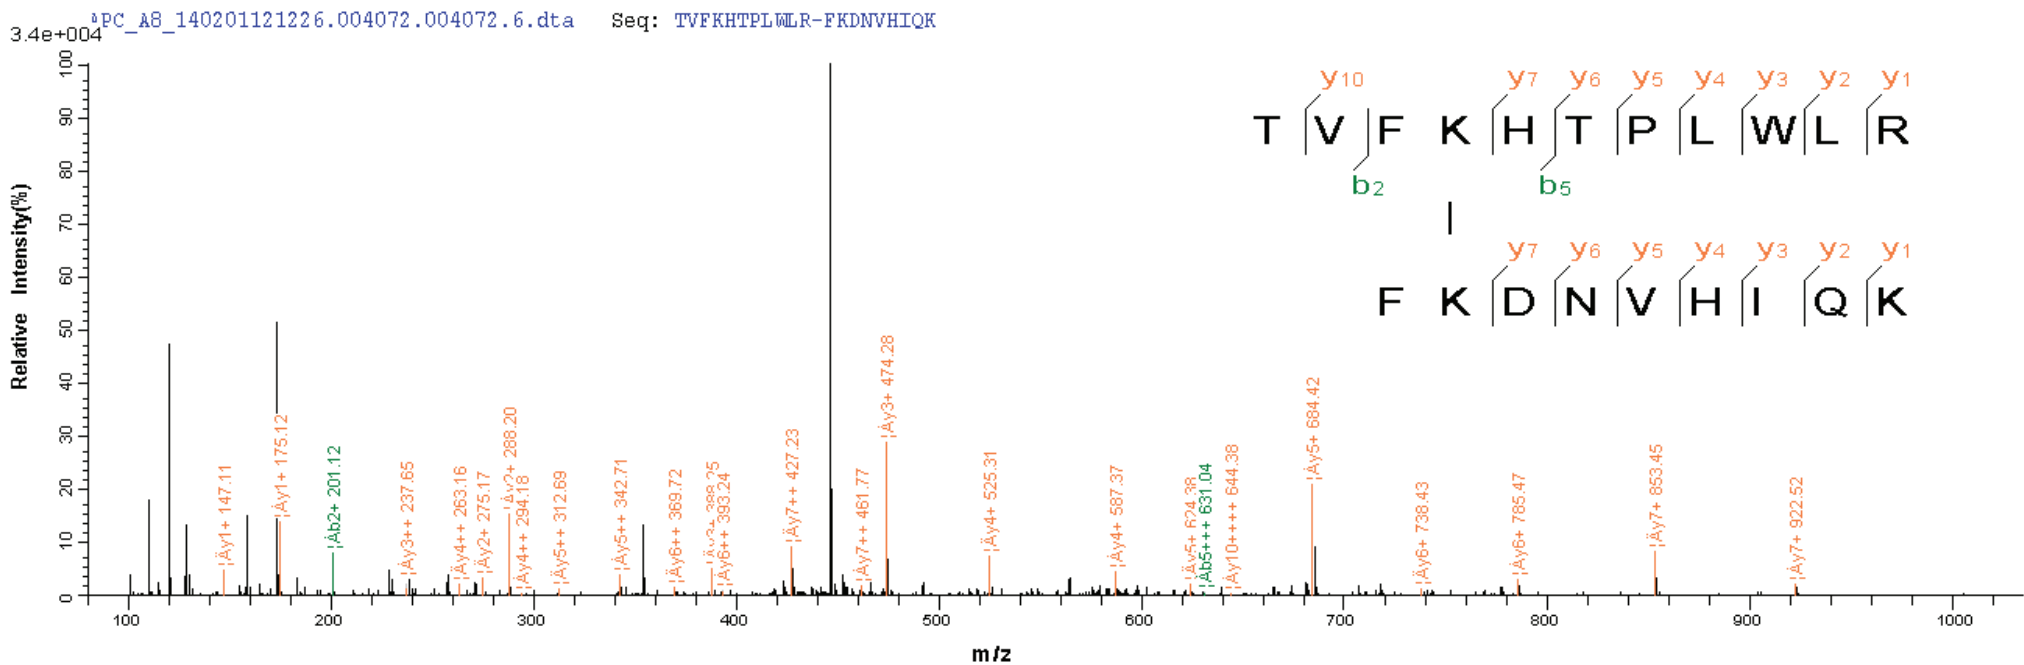

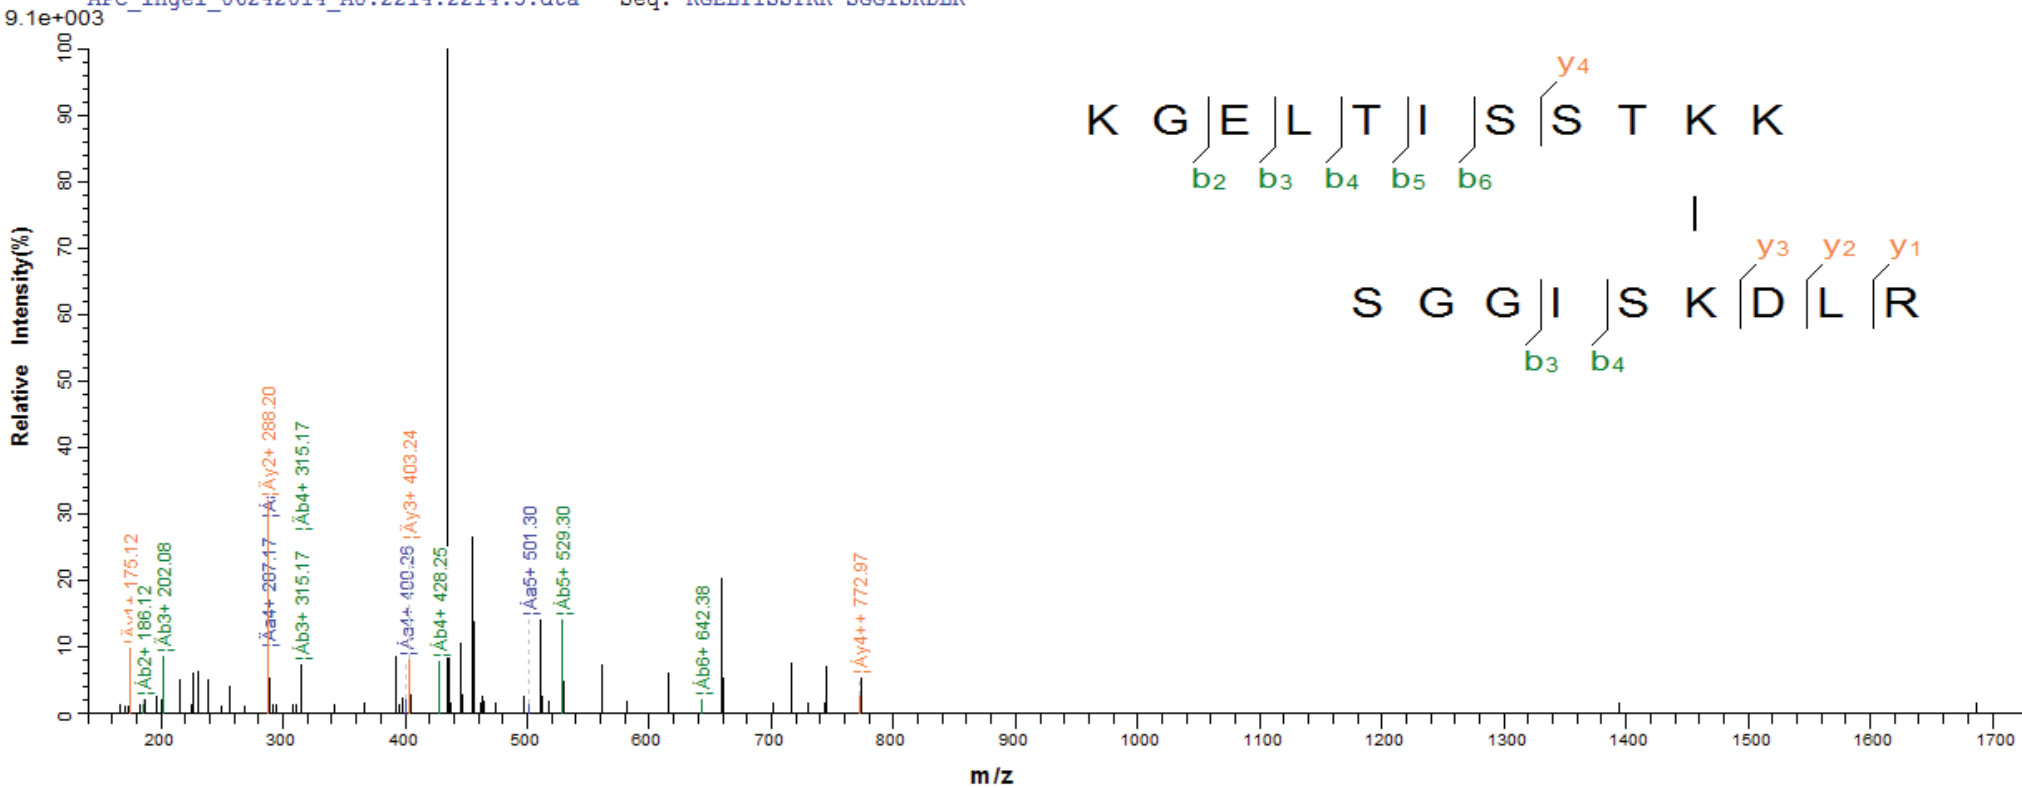



PC\_A8\_140201121226.005684.005684.4.dta Seq: YKMGQLLYSMTR-LGYKEK

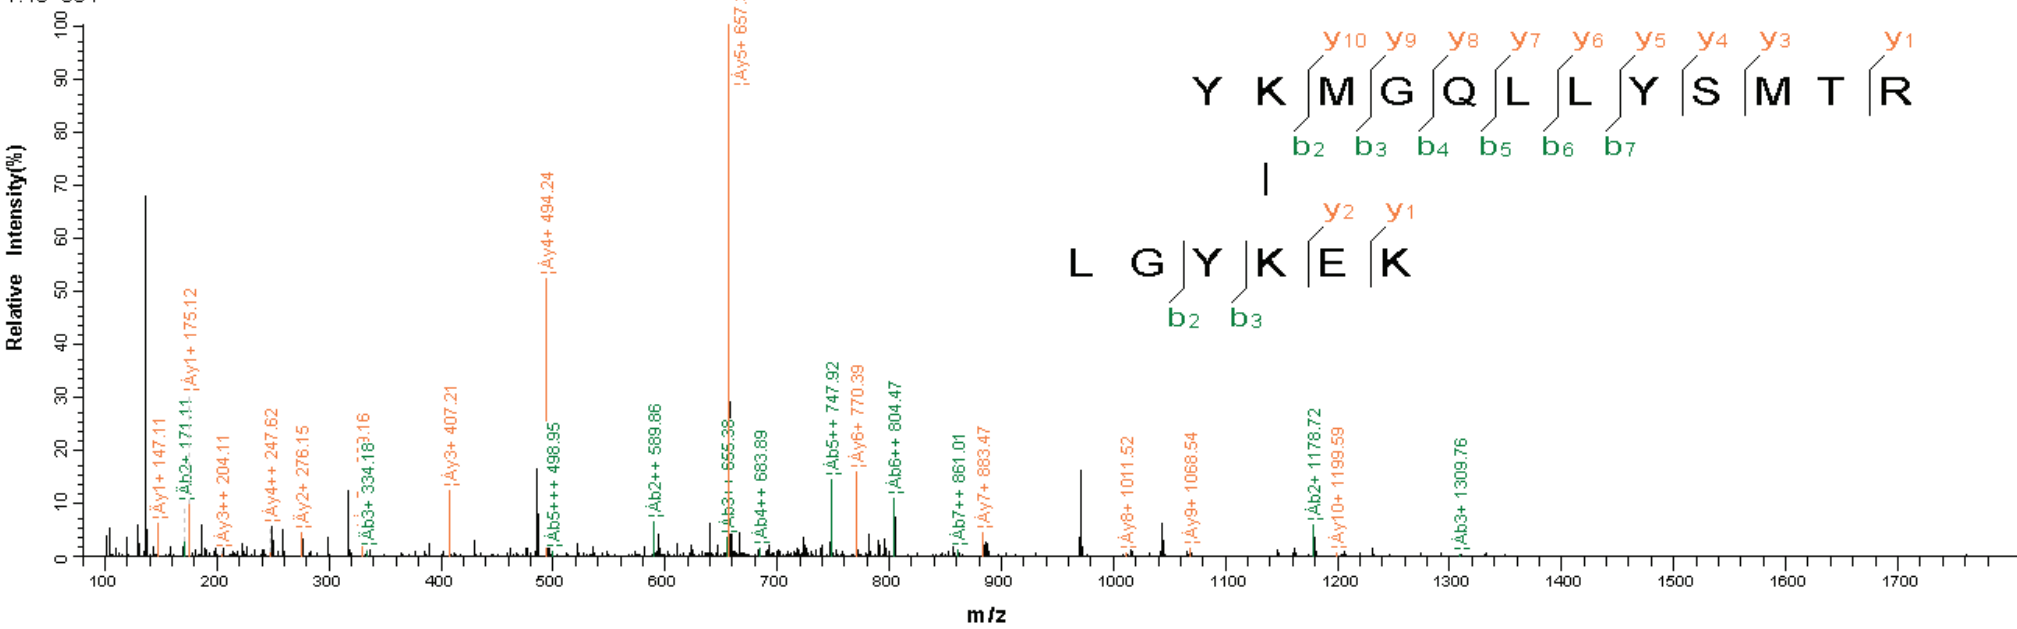



PC\_A8\_140201121226.007602.007602.5.dta Seq: LYSKFLSWDKK-DVTNPYLKFLK

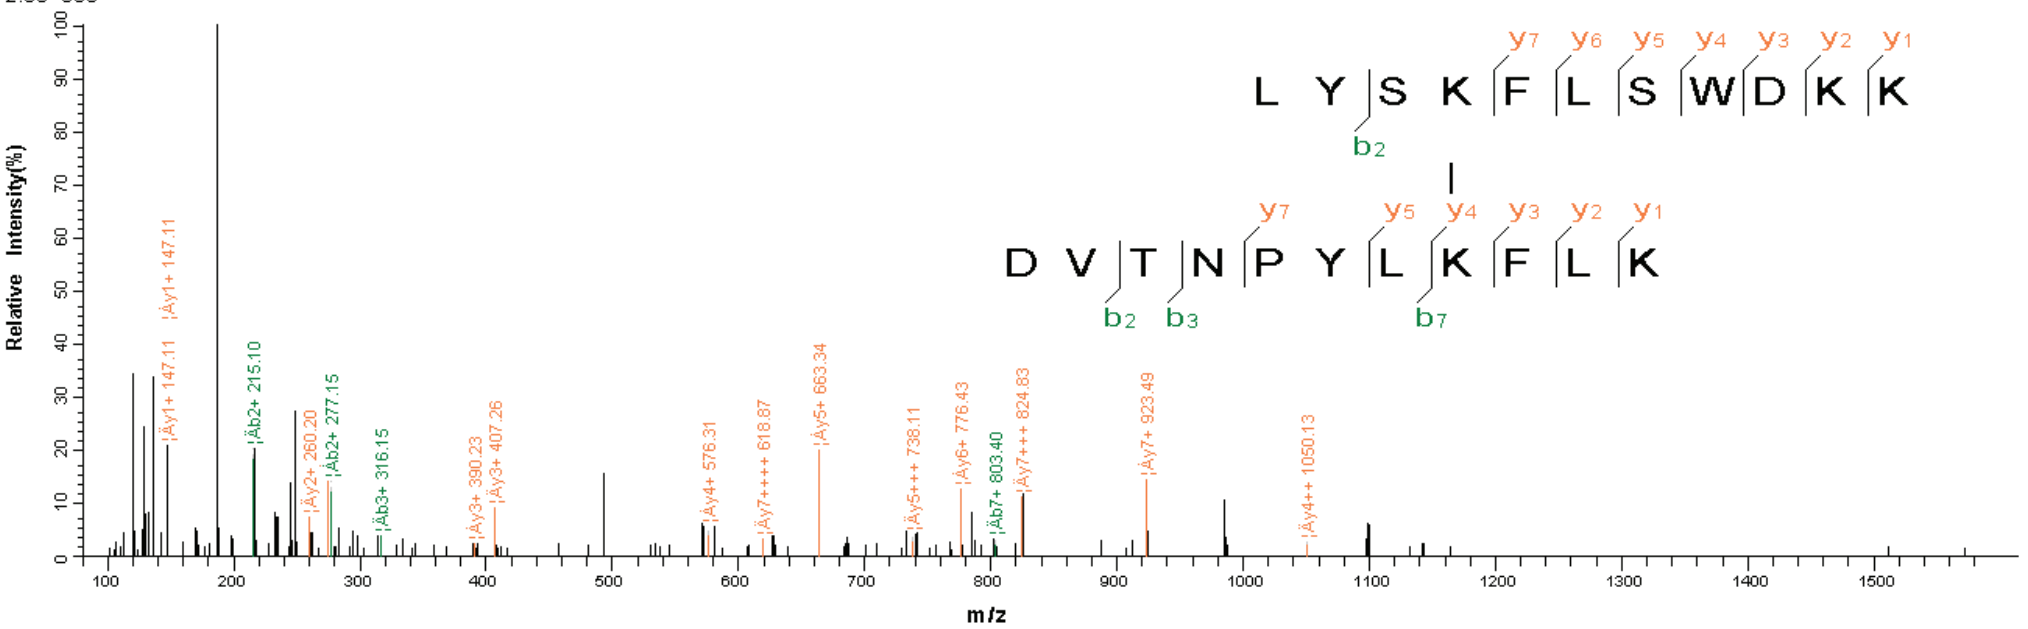

4.6e+003 PC\_A8\_140201121226.007697.007697.4.dta Seq: FLSIFFKDG TIR-ISKGIWDR

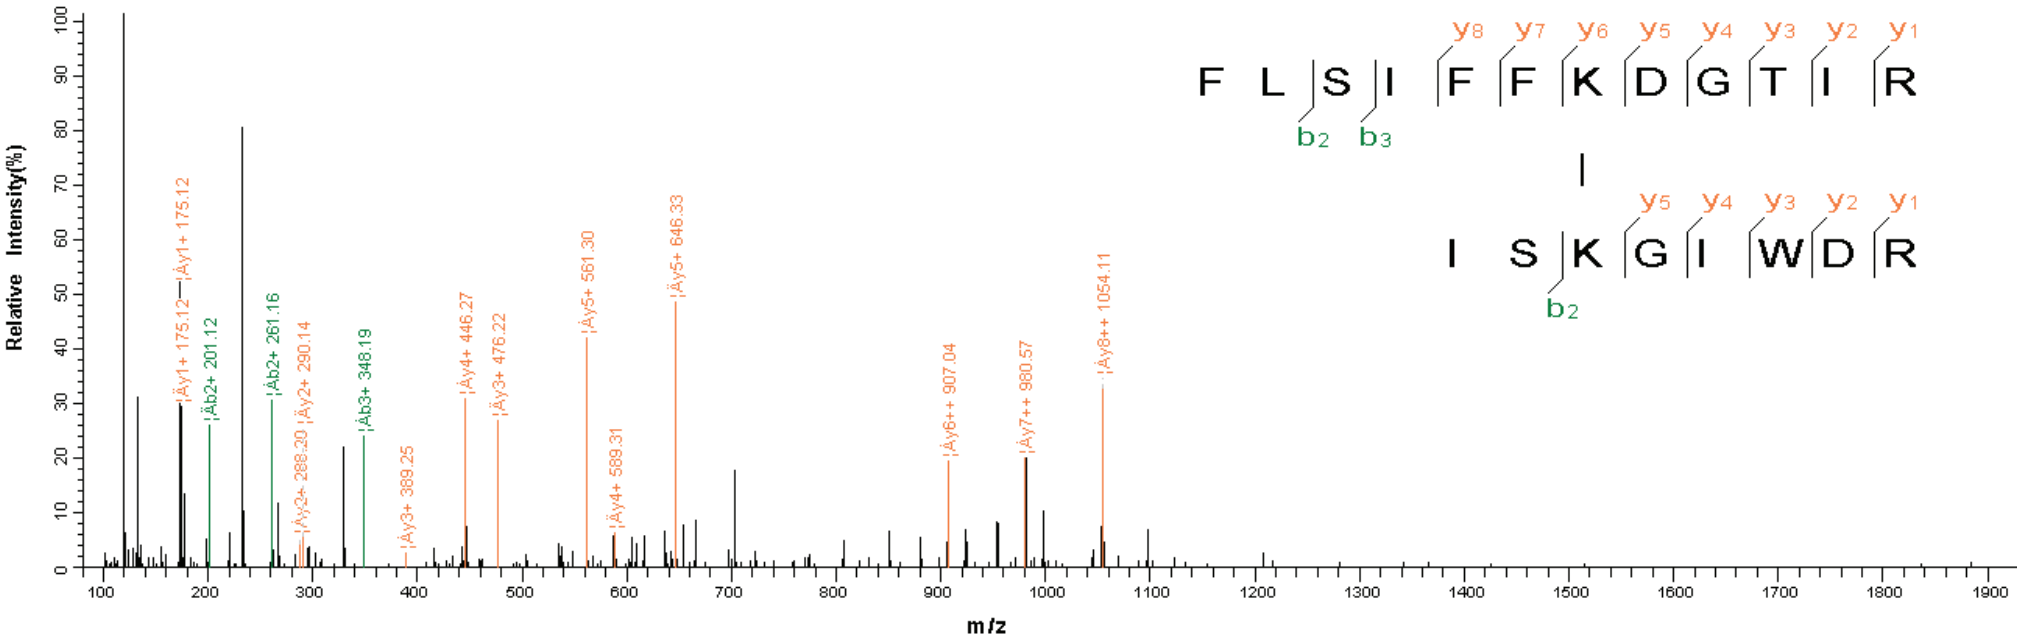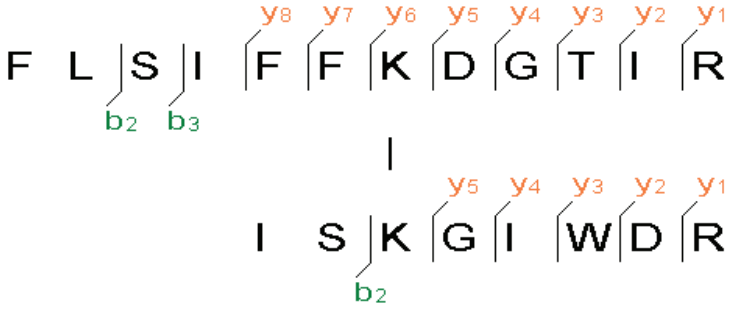

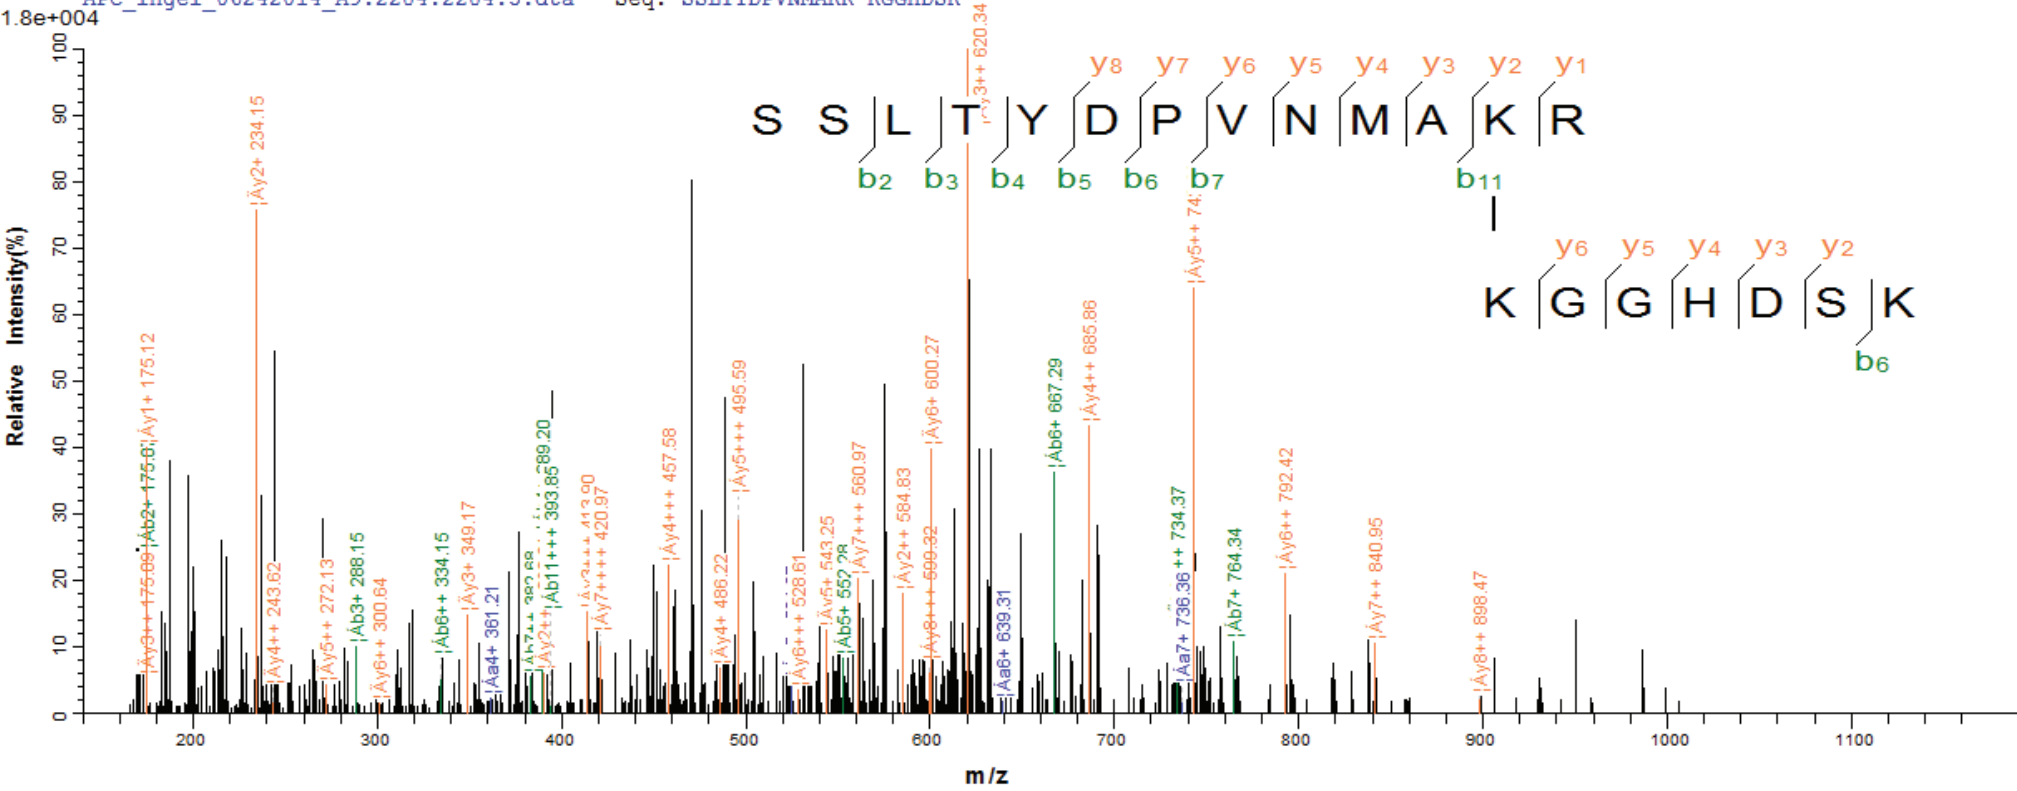

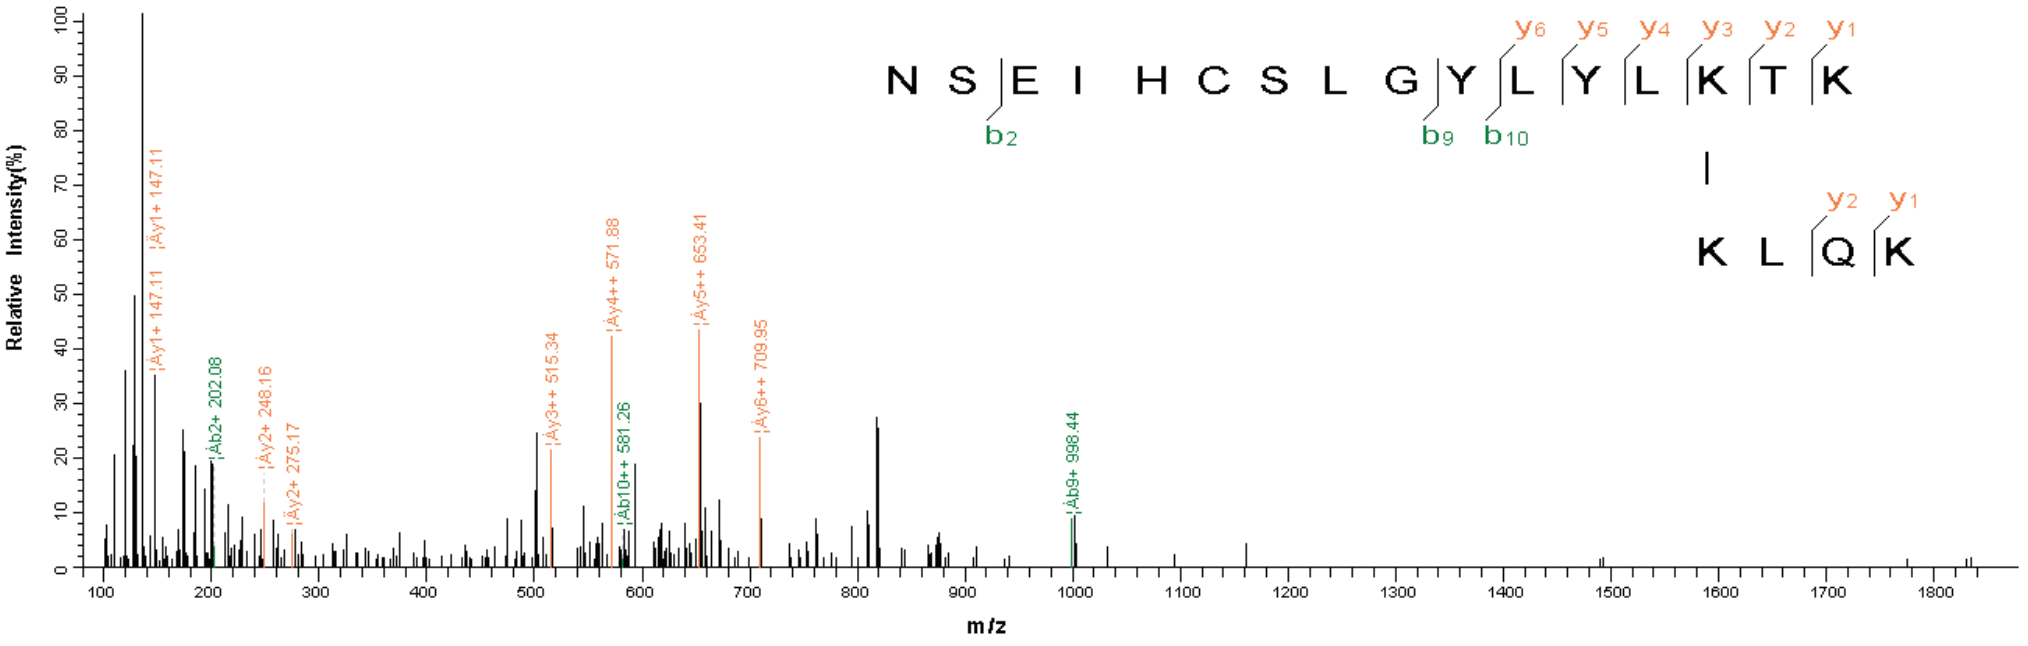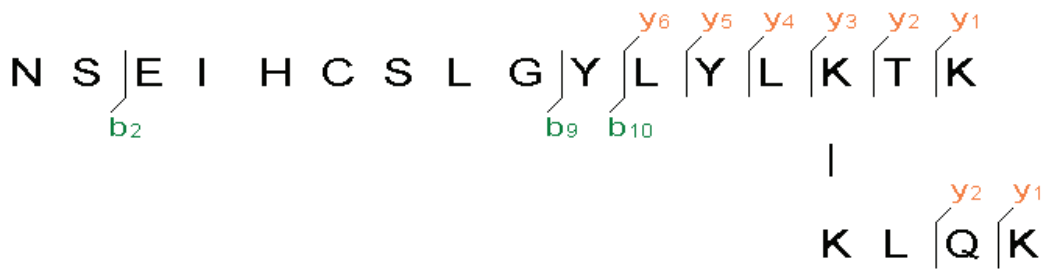

Seq: GNQVIIDELQKCHMQE-KKDAIK Mod: 12,C\_57 14, Oxidation\_M\_15.995 MH+: 2798.4258

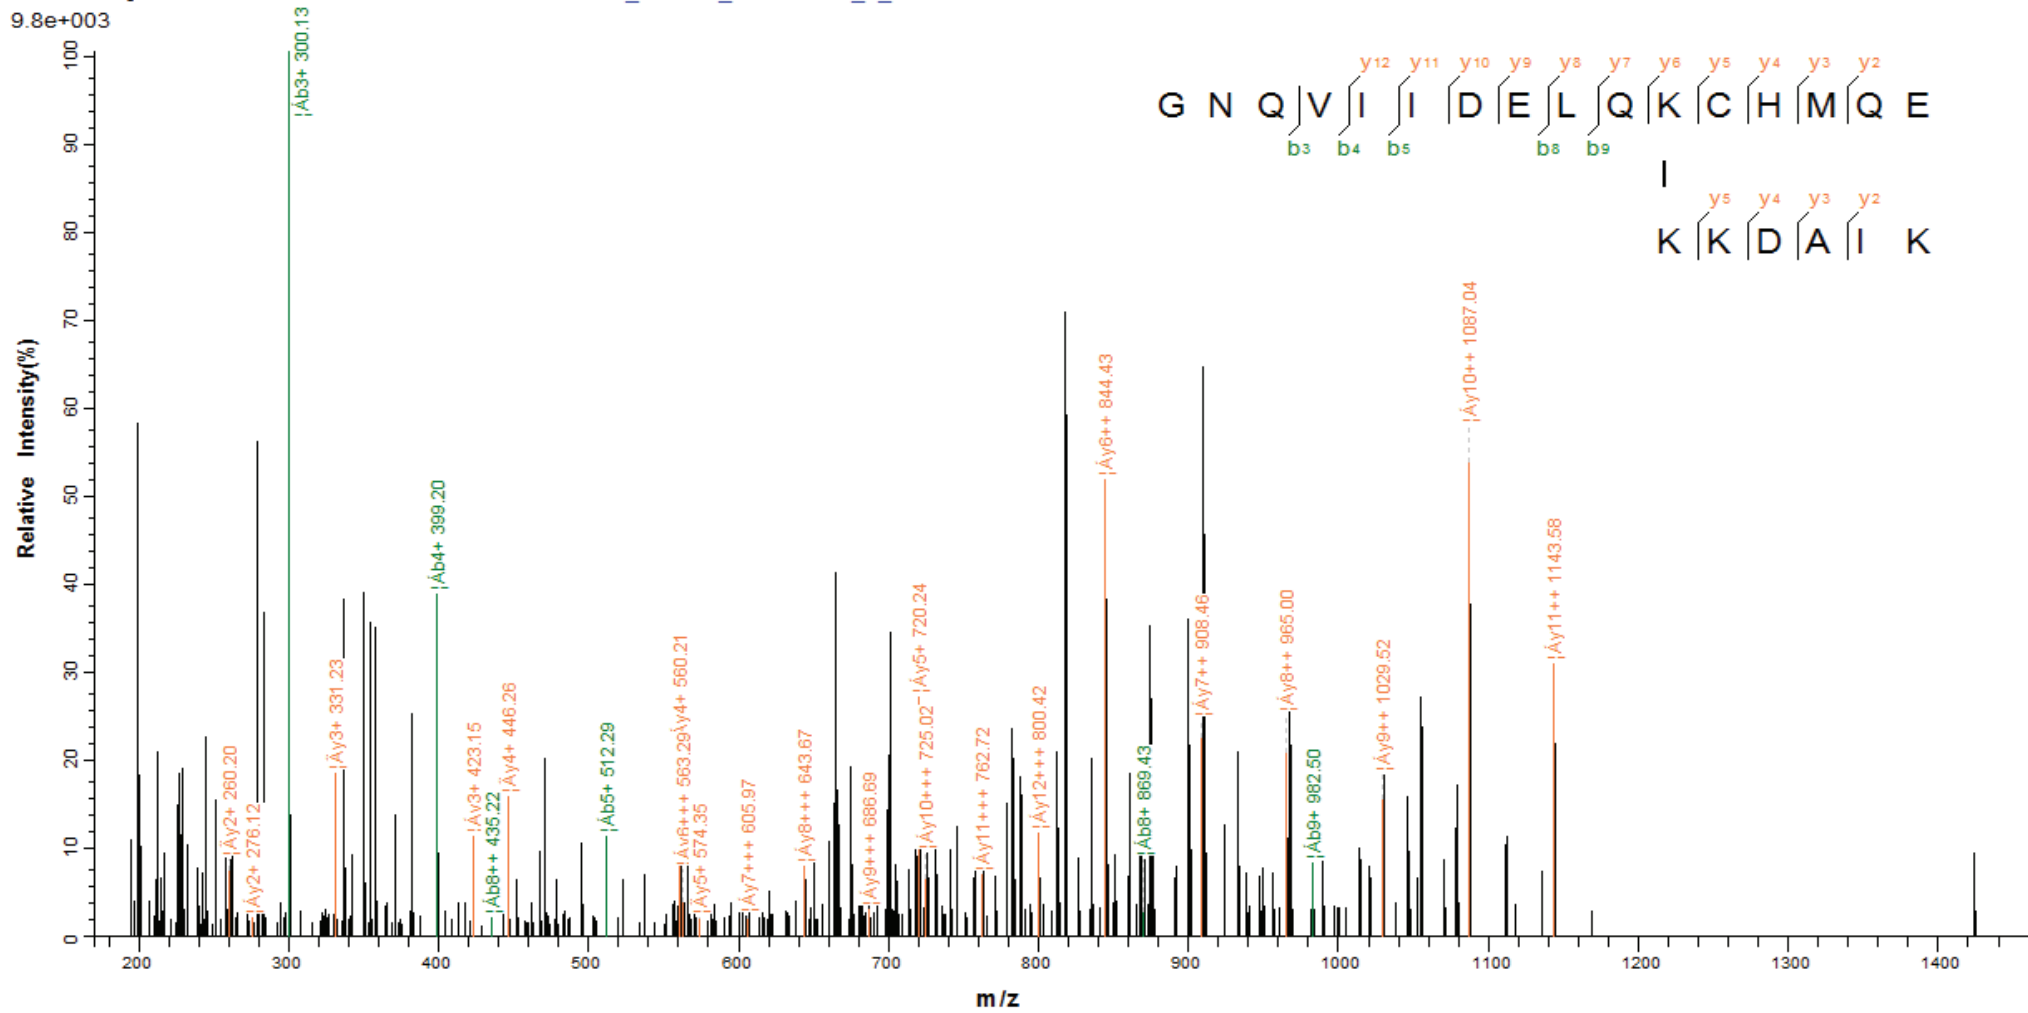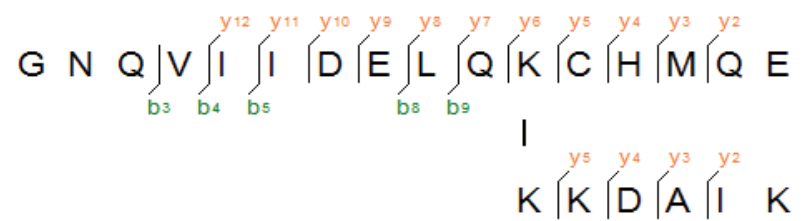

3.6e+003 PC\_A8\_140201121226.007731.007731.5.dta Seq: SSSLKPKPSDIYSILSEIVK-VPLAKNR

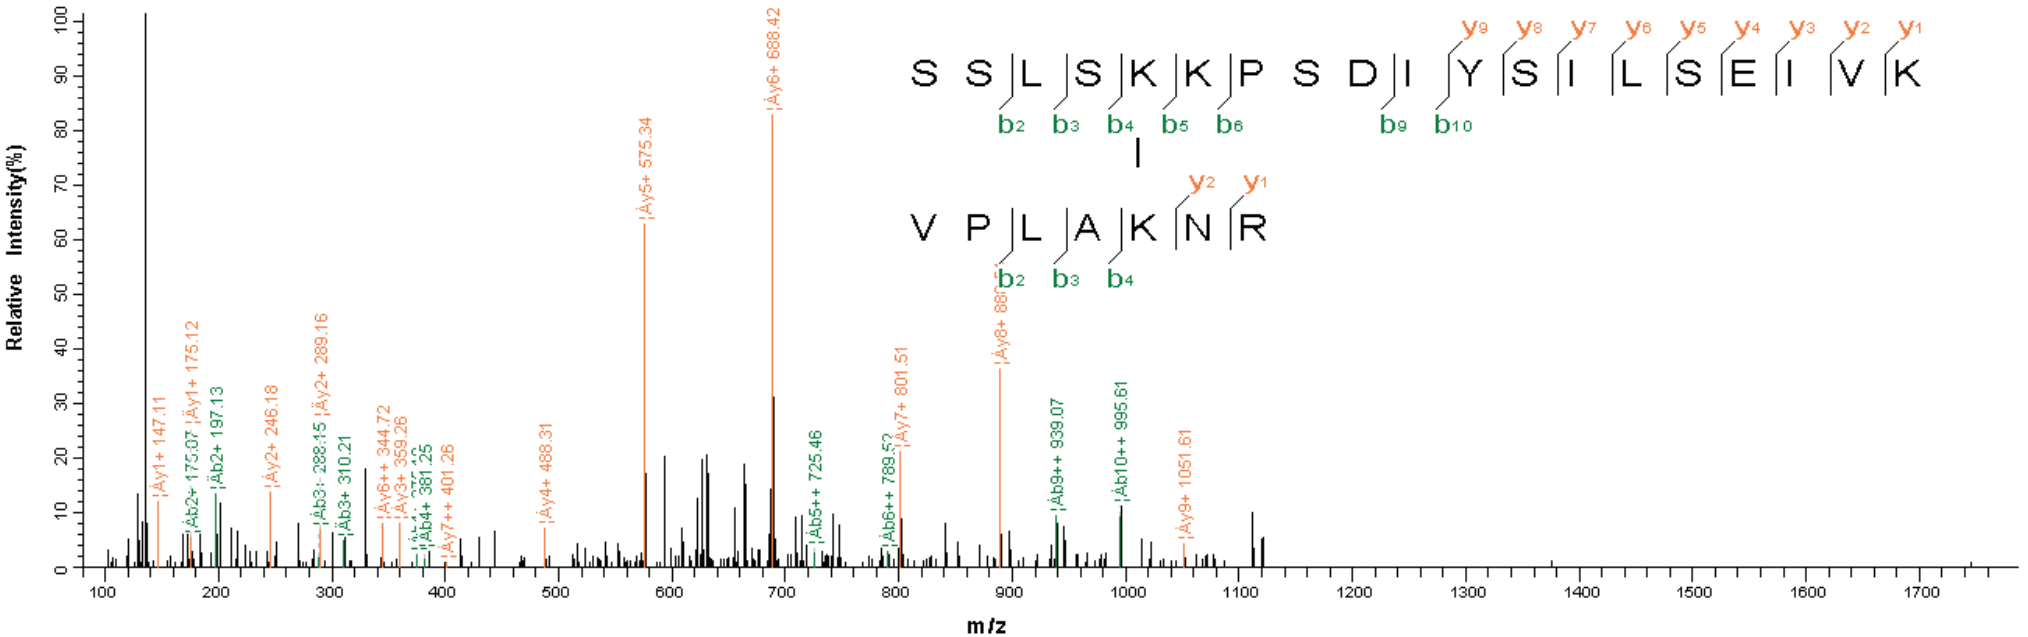

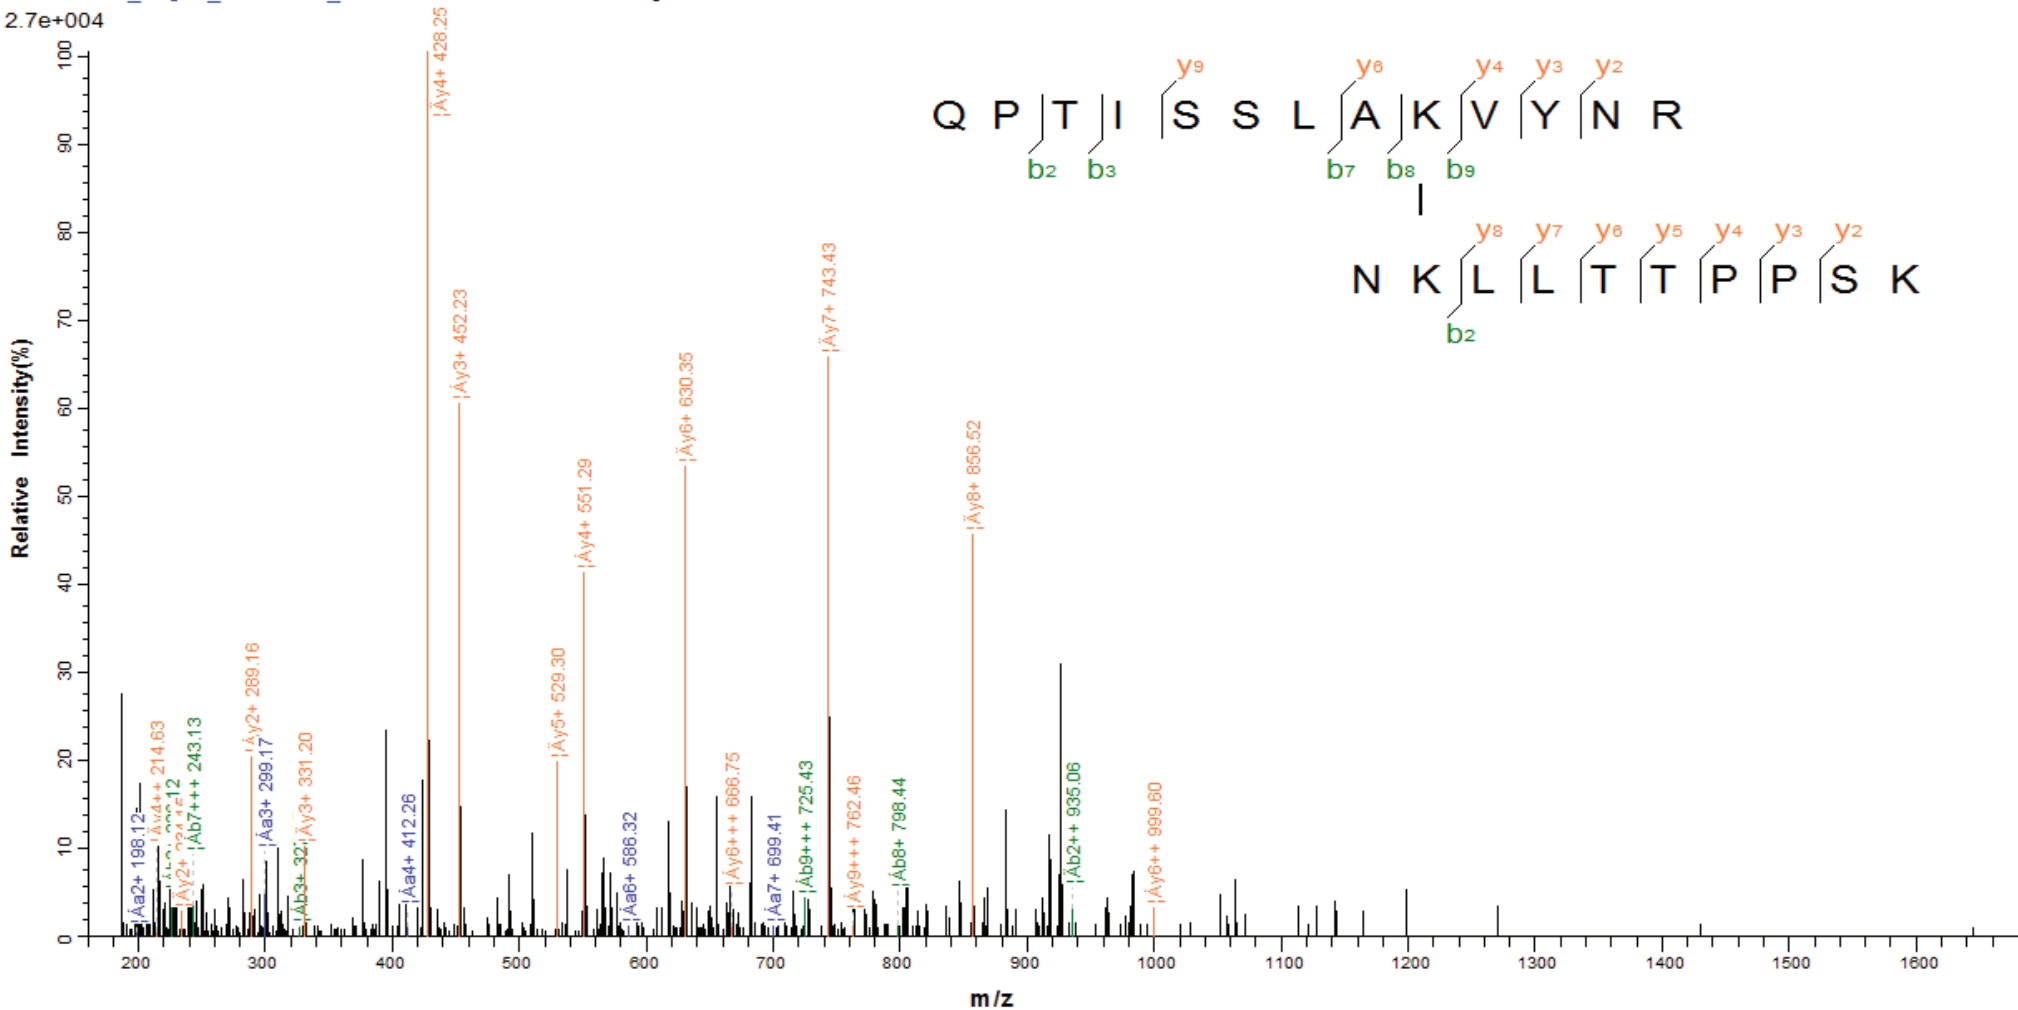

APC\_ingel\_06242014\_A8.3465.3465.4.dta

Seq: SIKASQTVDQNTSIYYR-KFMMK

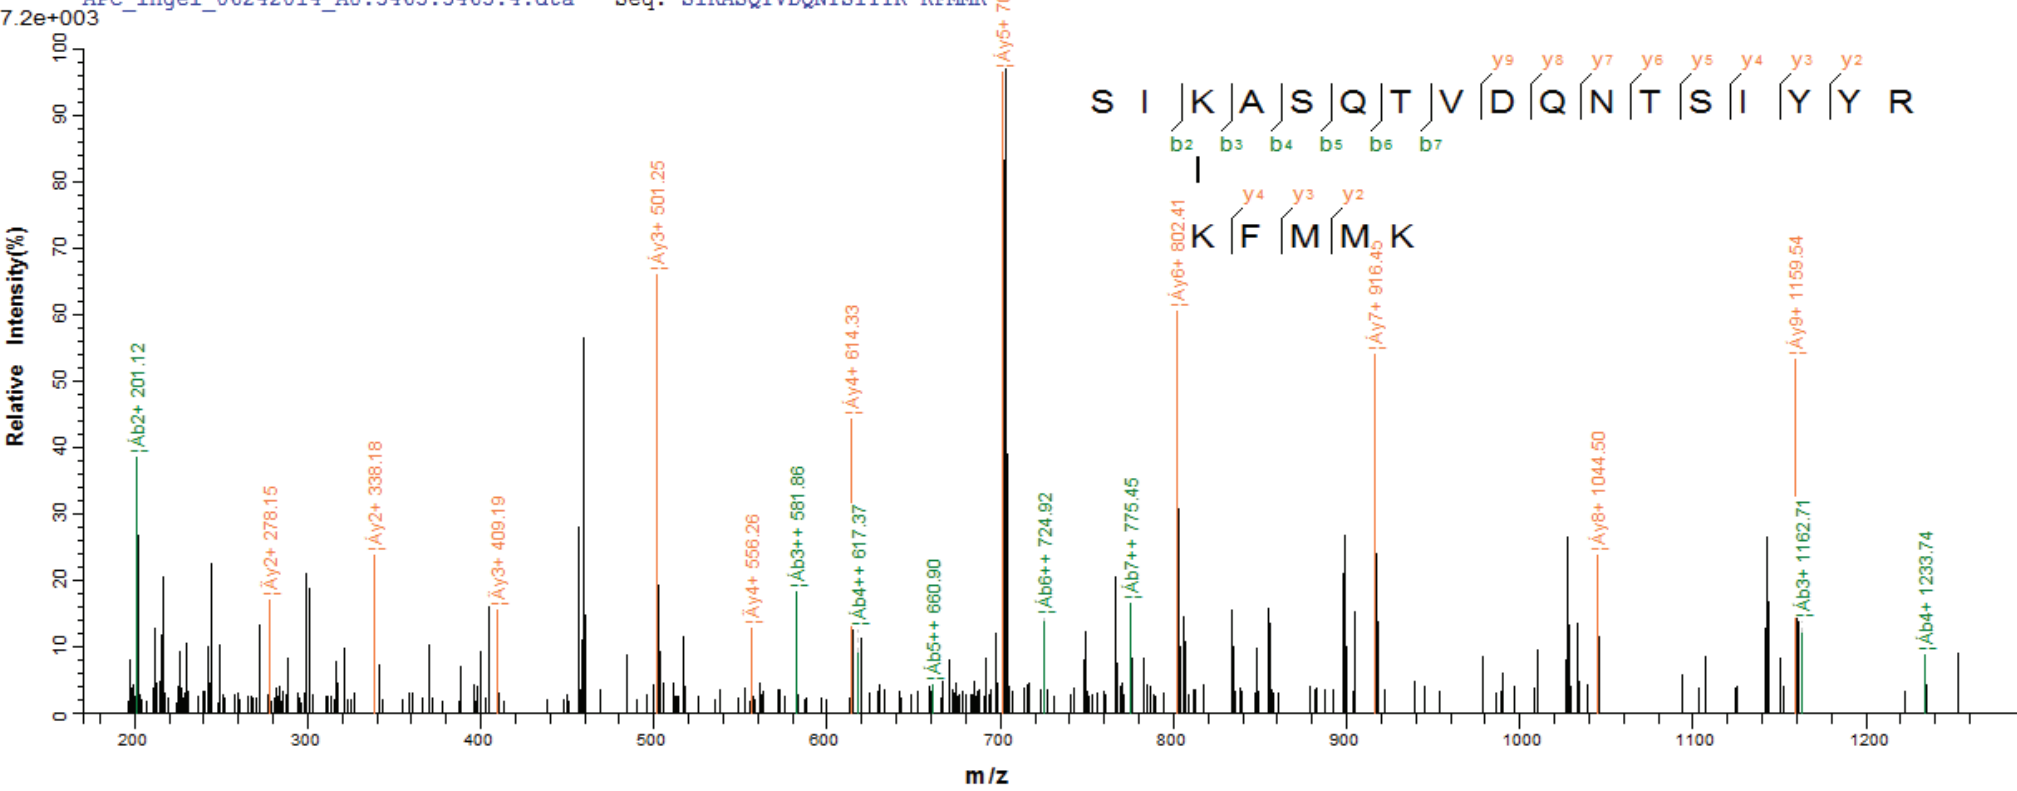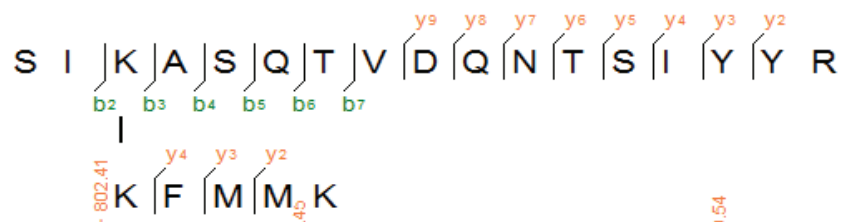



PC\_A8 140201121226.002743.002743.5.dta Seq: LHKIHSFLK-EKIVK

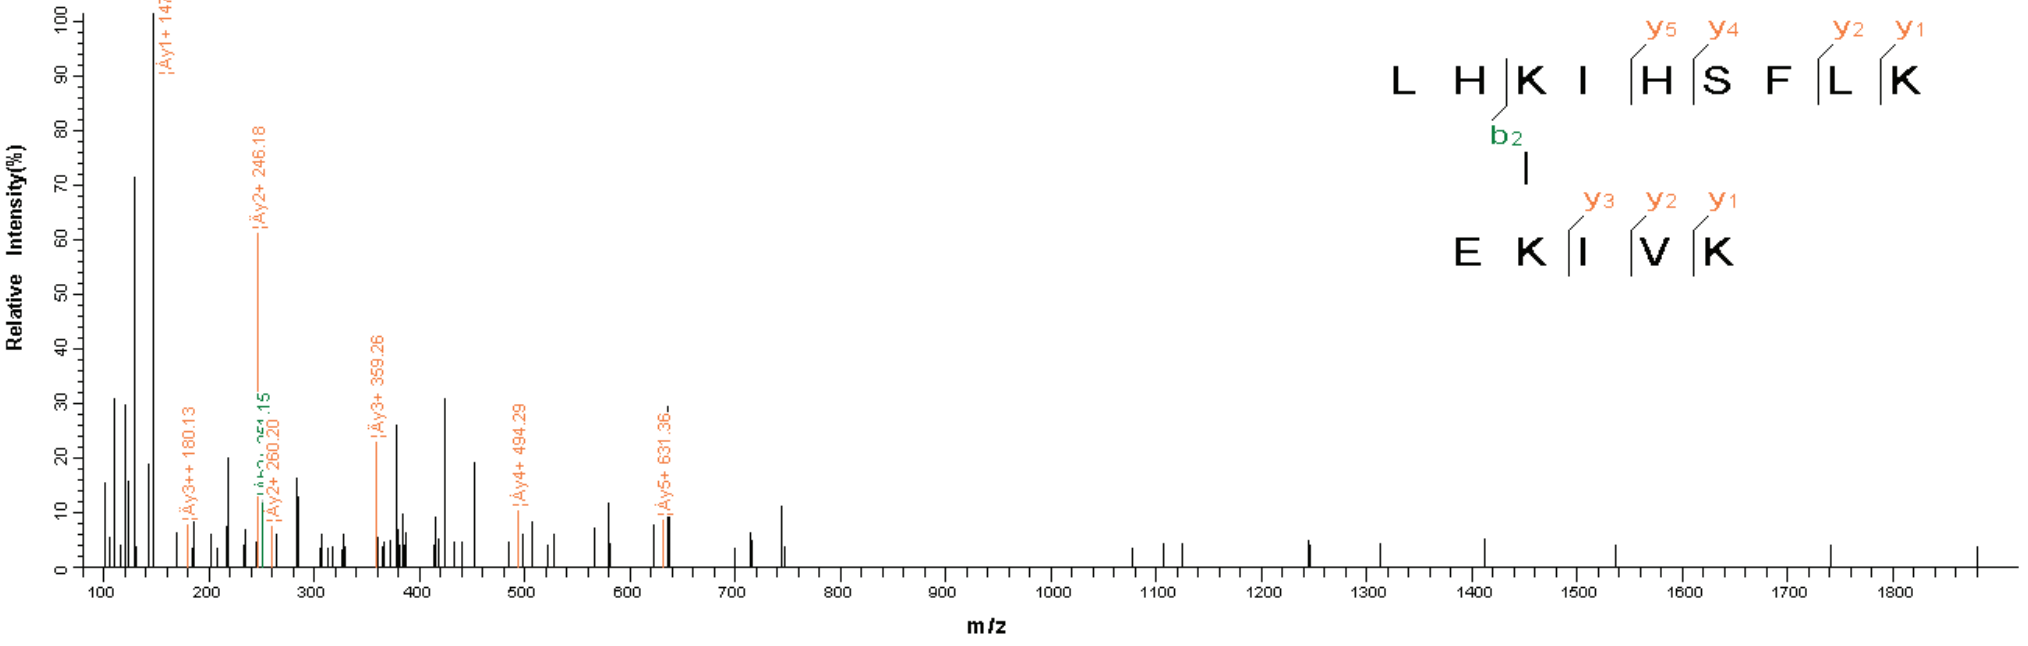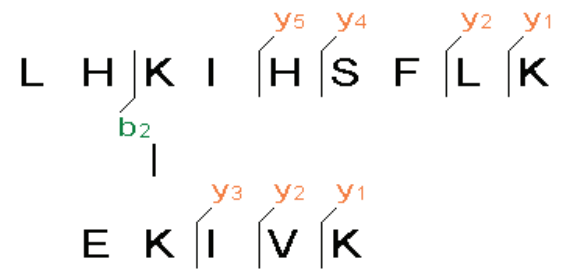

APC\_ingel\_06242014\_A8.4061.4061.4.dta Seq: VFFDIAGKK-ATVDLKR

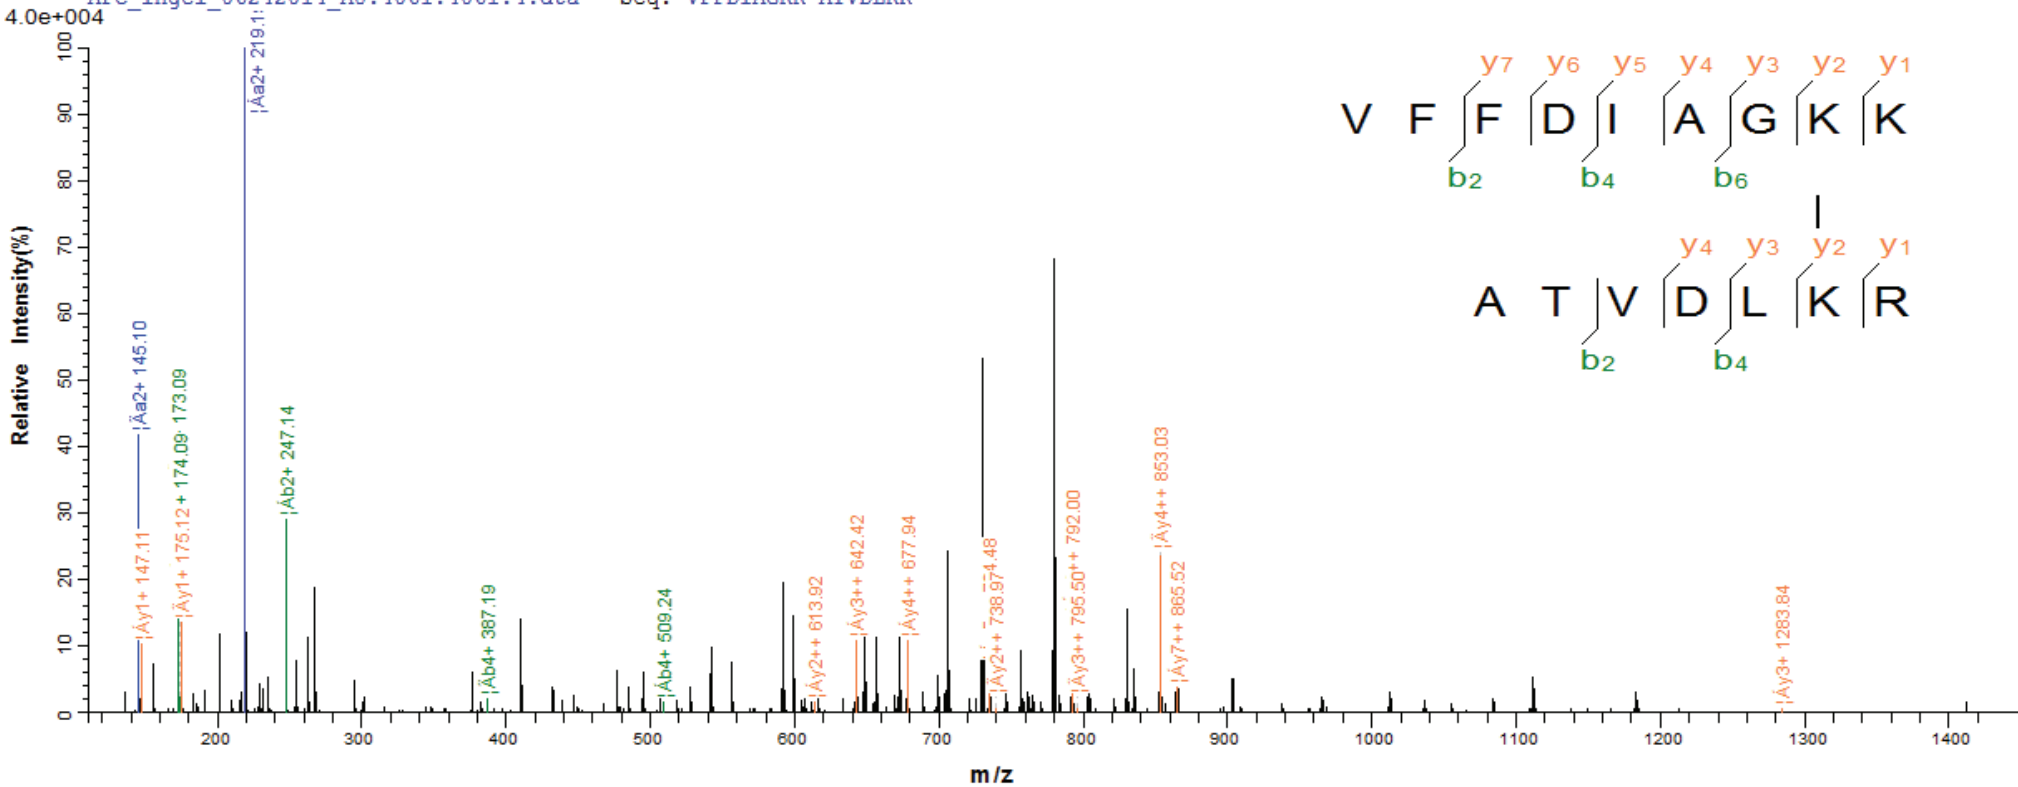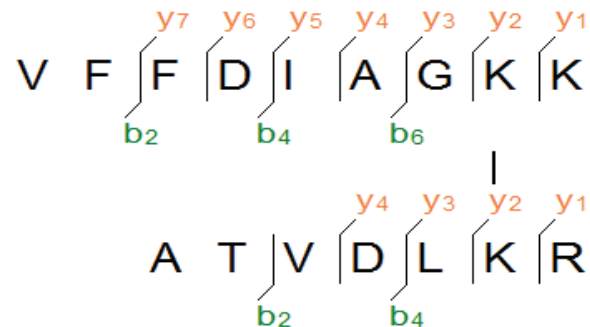

1.0e+004 PC\_A8\_140201121226.006467.006467.4.dta Seq: NYDSSIINQDIKVAFK-FLSKTSSSSLR

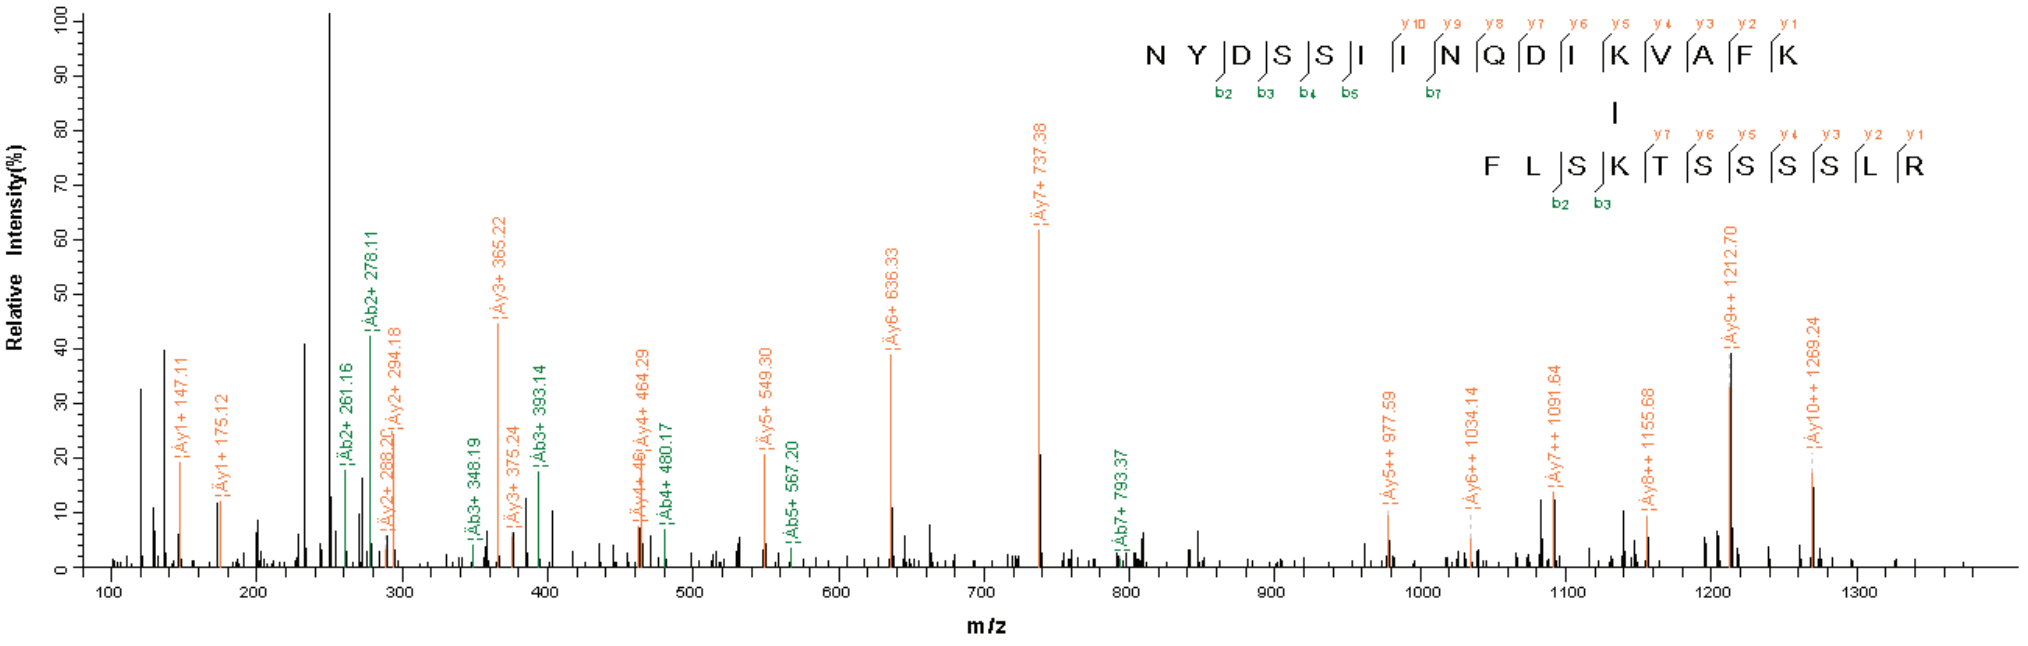

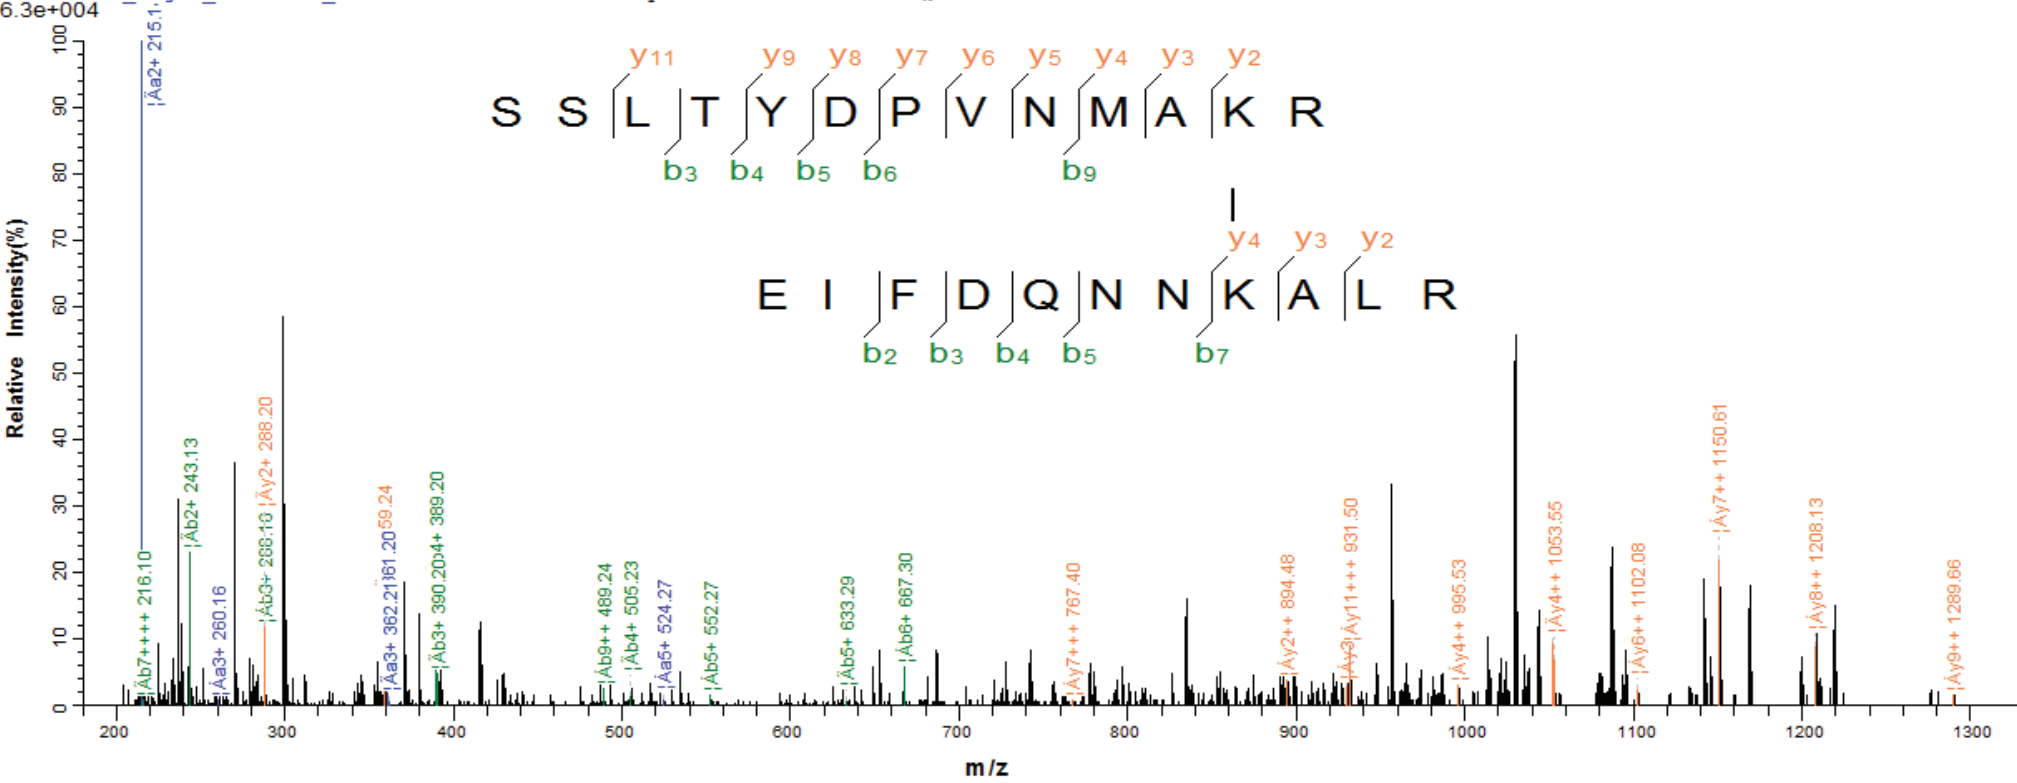

Fig. S17

Annotated high-resolution HCD spectra of  
crosslink peptides of exosome complex

Seq: NILVSVLPGTEKGR-AKPVTNSSILLGK

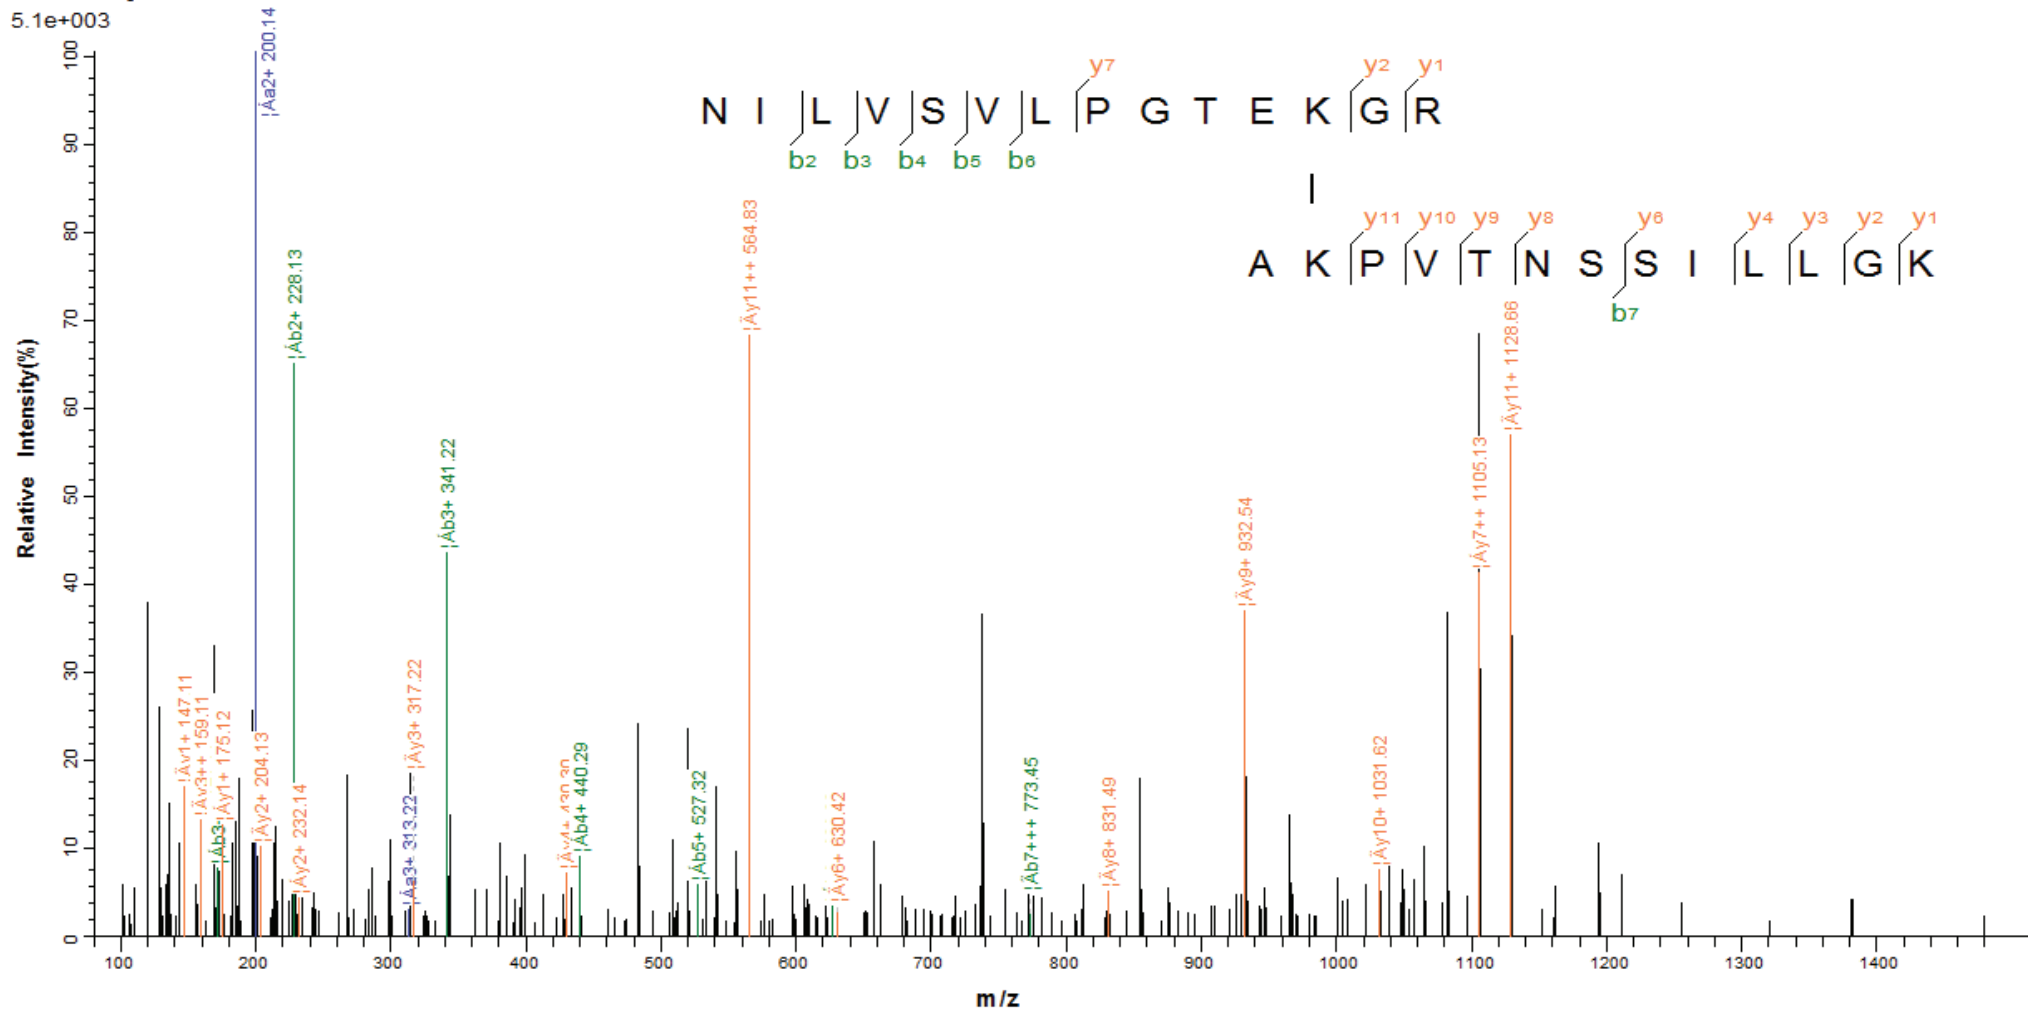

Seq: VKVIECFKPGDIVR-KSSNLDPSSSNSFK Mod: 6,C\_57

2.2e+003

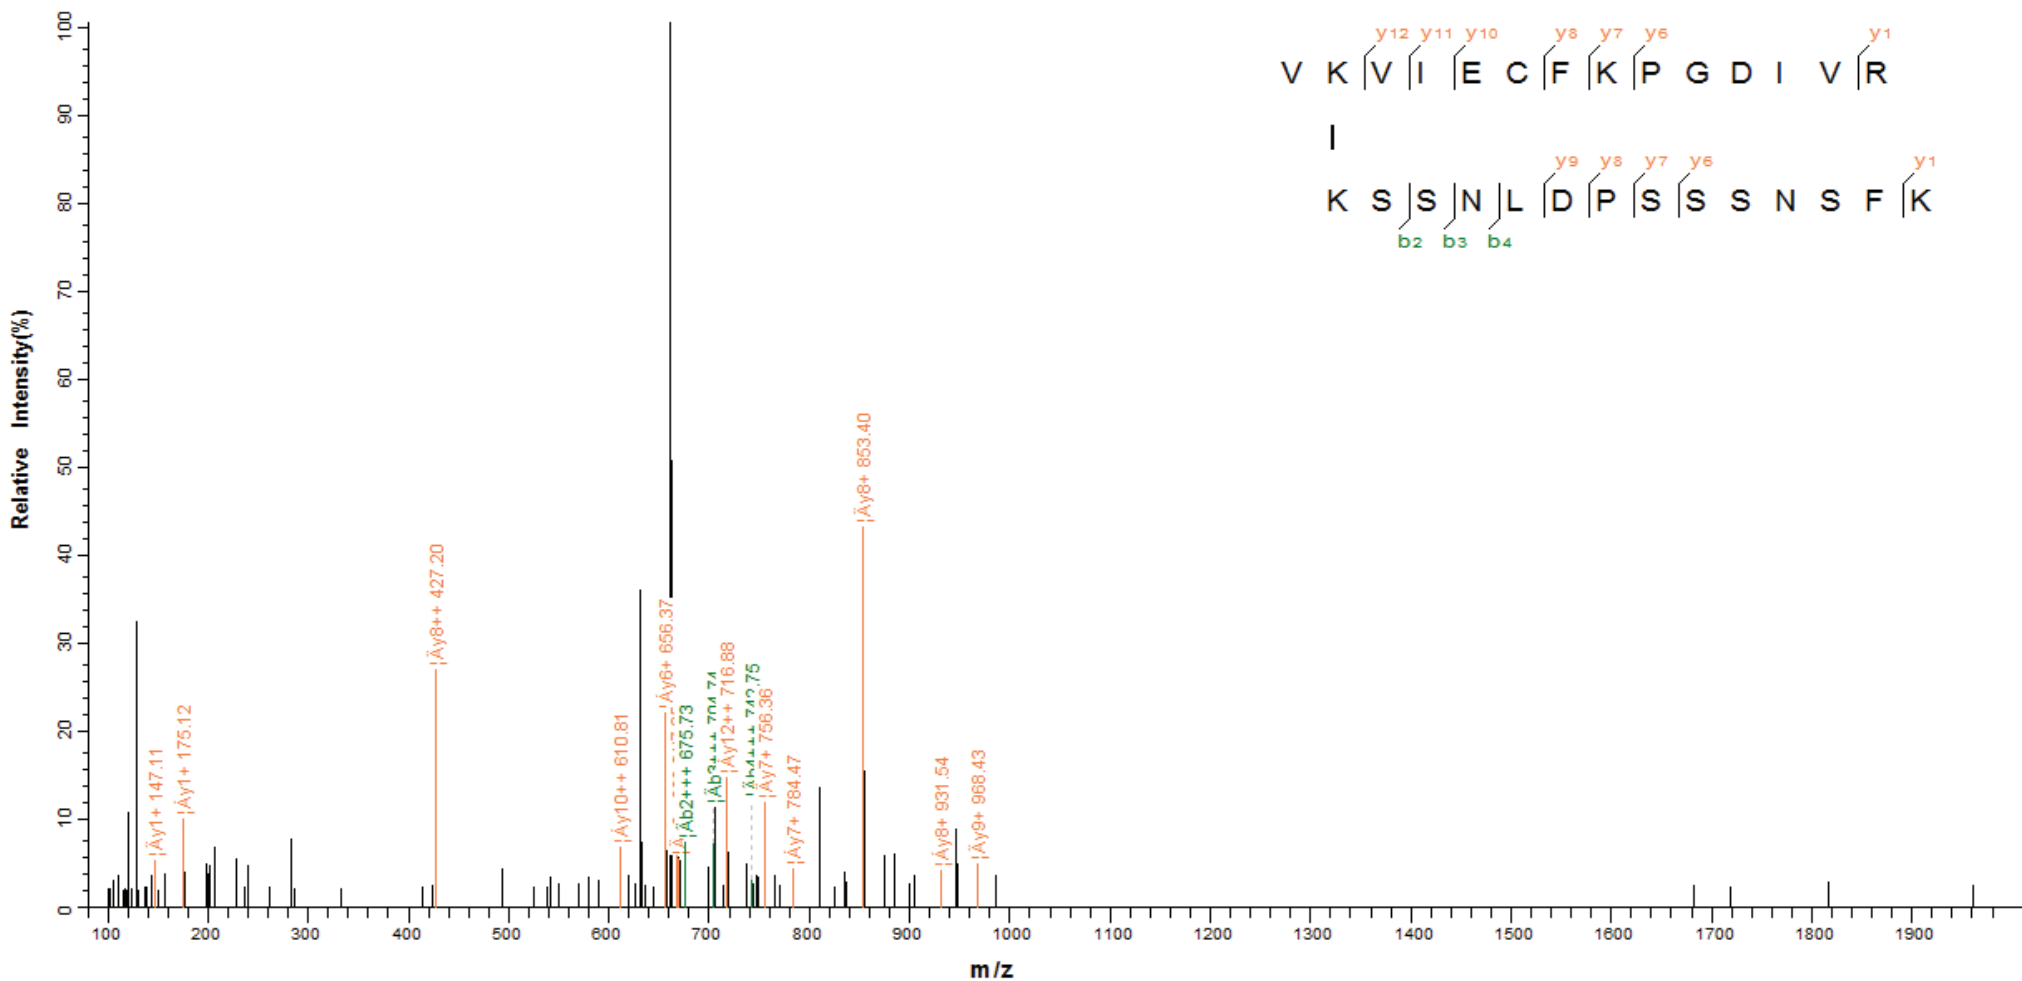

V K V I E C F K P G D I V R  
I  
K S S N L D P S S S N S F K  
b2 b3 b4

Seq: DGEDIIFNYVPGPGTKLIQYEHNGR-SVALNDSNVKSFKPHLLK Score: 2.24e-012

2.4e+003

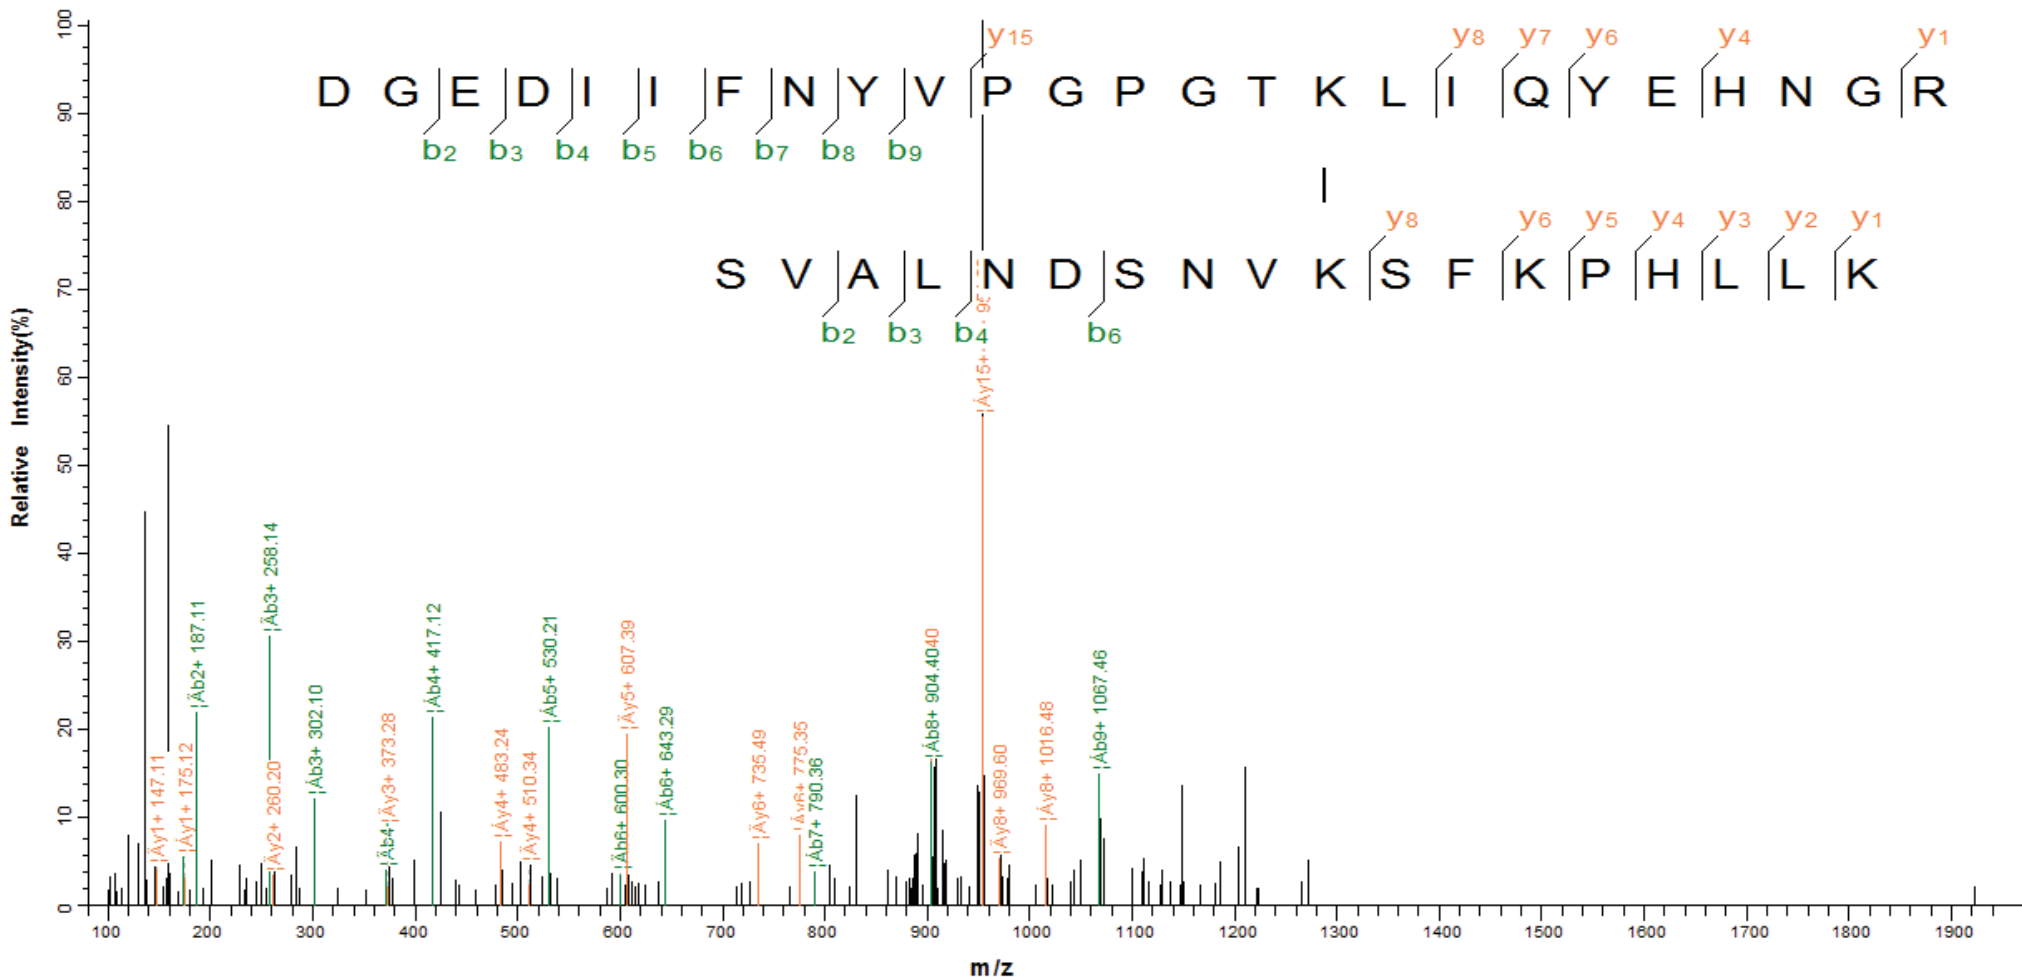



Seq: DGEDIIFNYVPGPGTKLIQYEHNGR-SVALNDSNVKSFKPHLLK

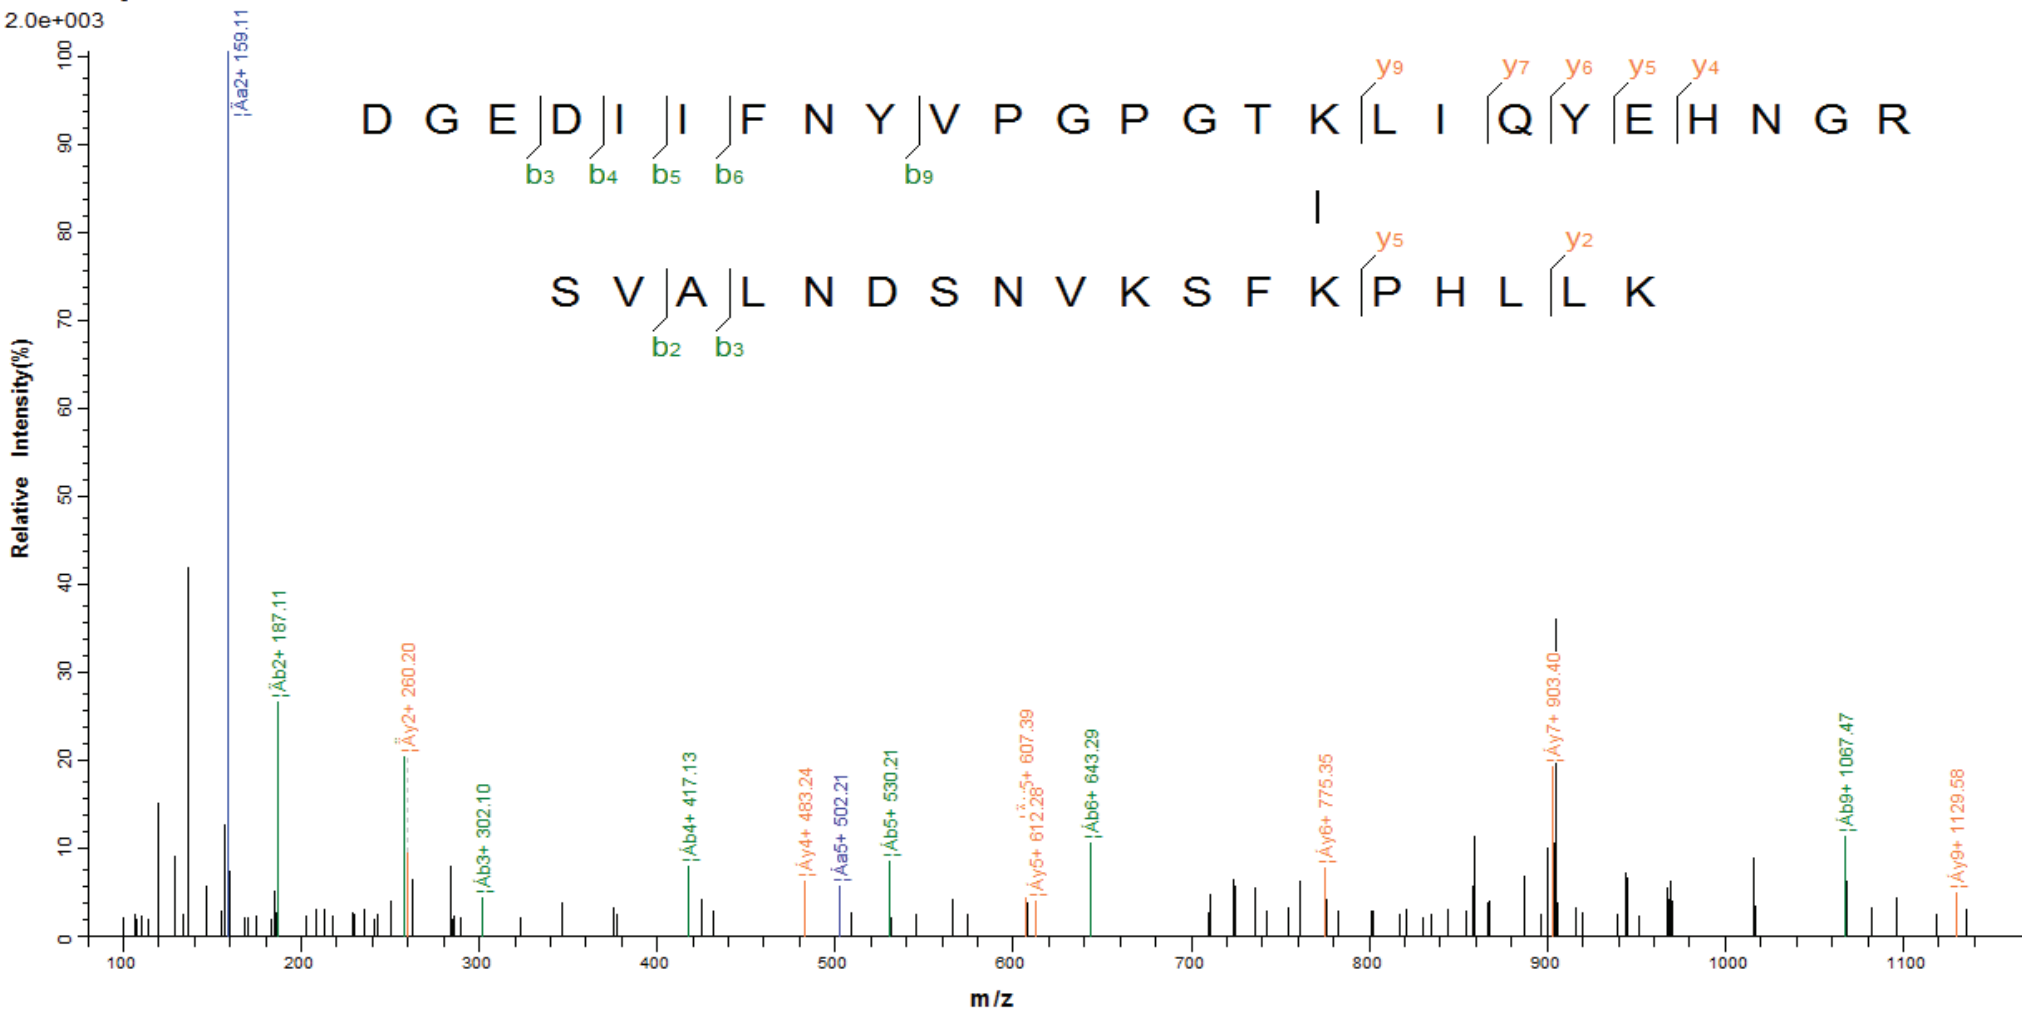

Seq: NGGATKIVR-FSKFER

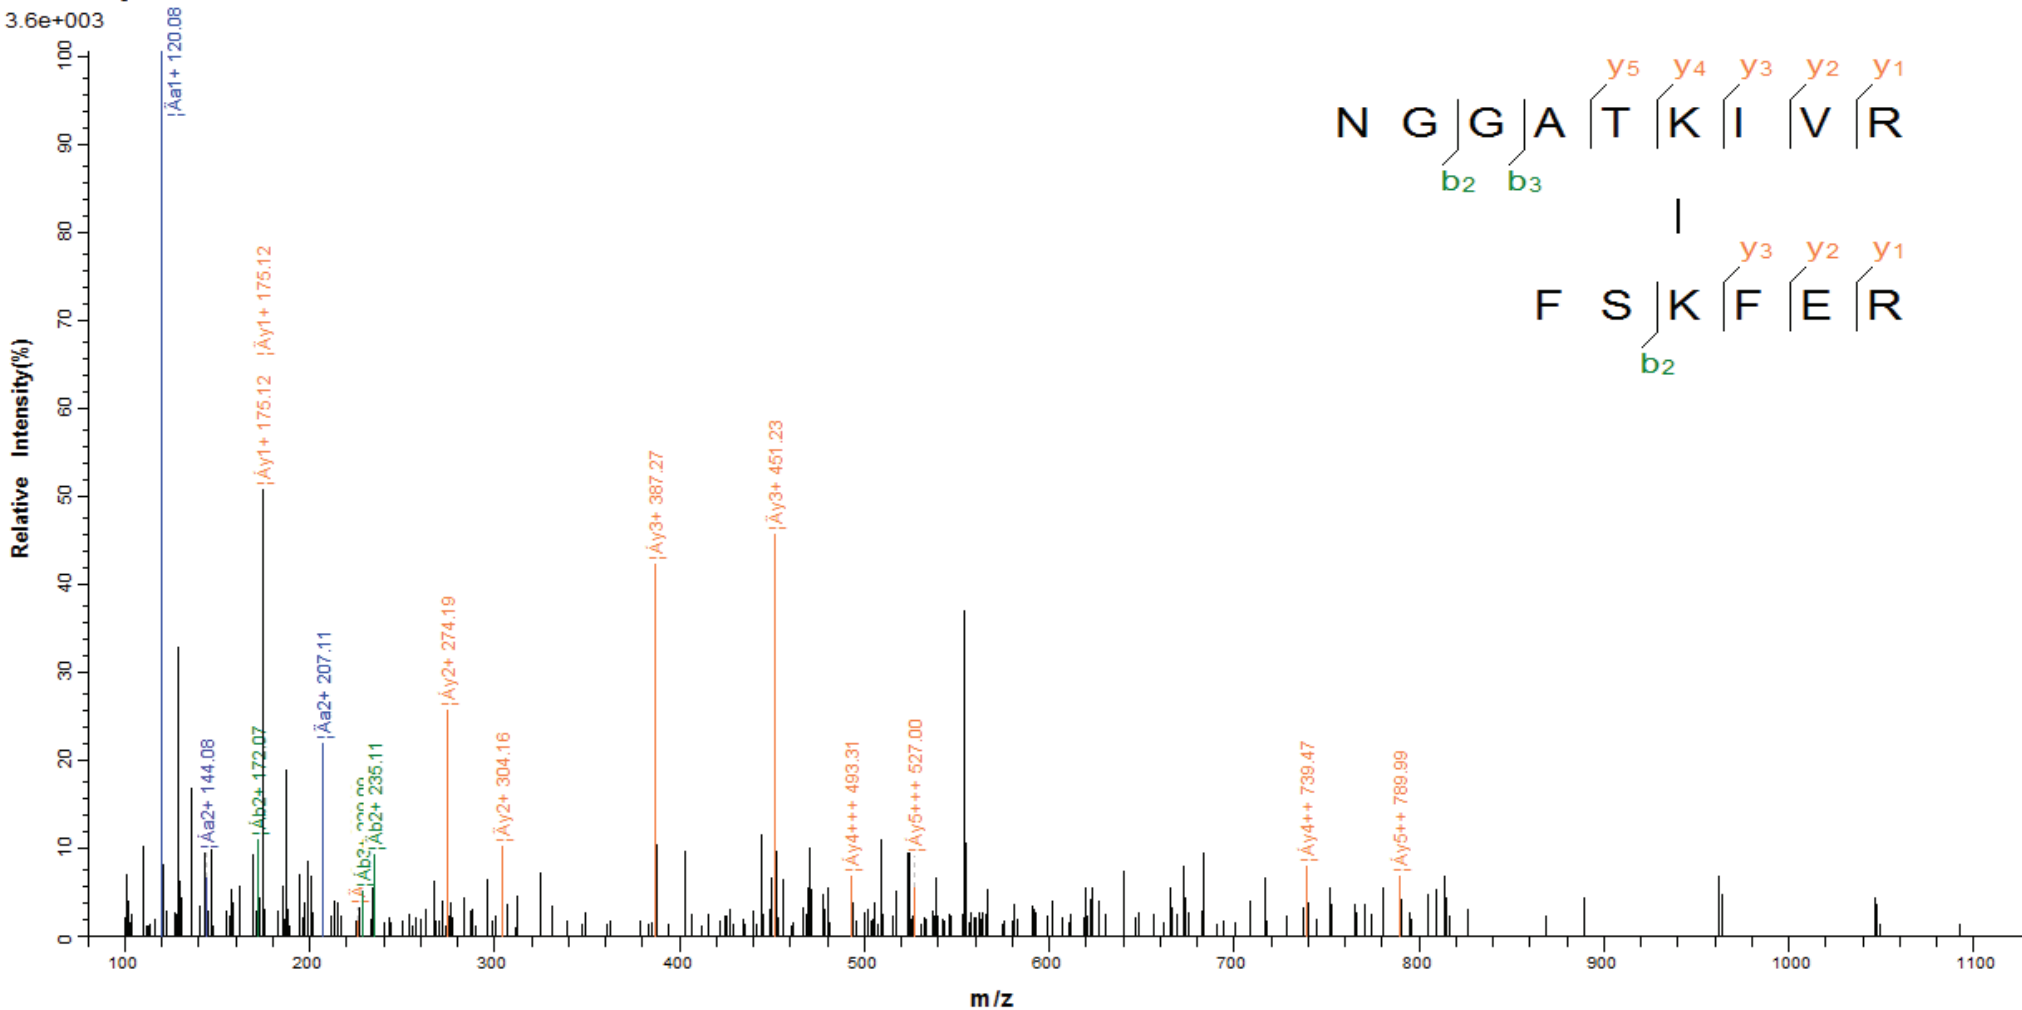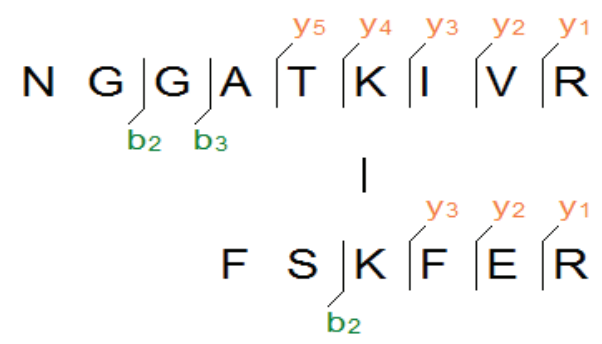

Exosome\_GFP\_test\_A78.003476.003476.5.dta Seq: DLGTTESAQAETEALHLDVYRPFSSKK-NKYAAMLTSENAF Mod: 38,\_Oxidation\_M\_15.995 Score: 6.88e-007

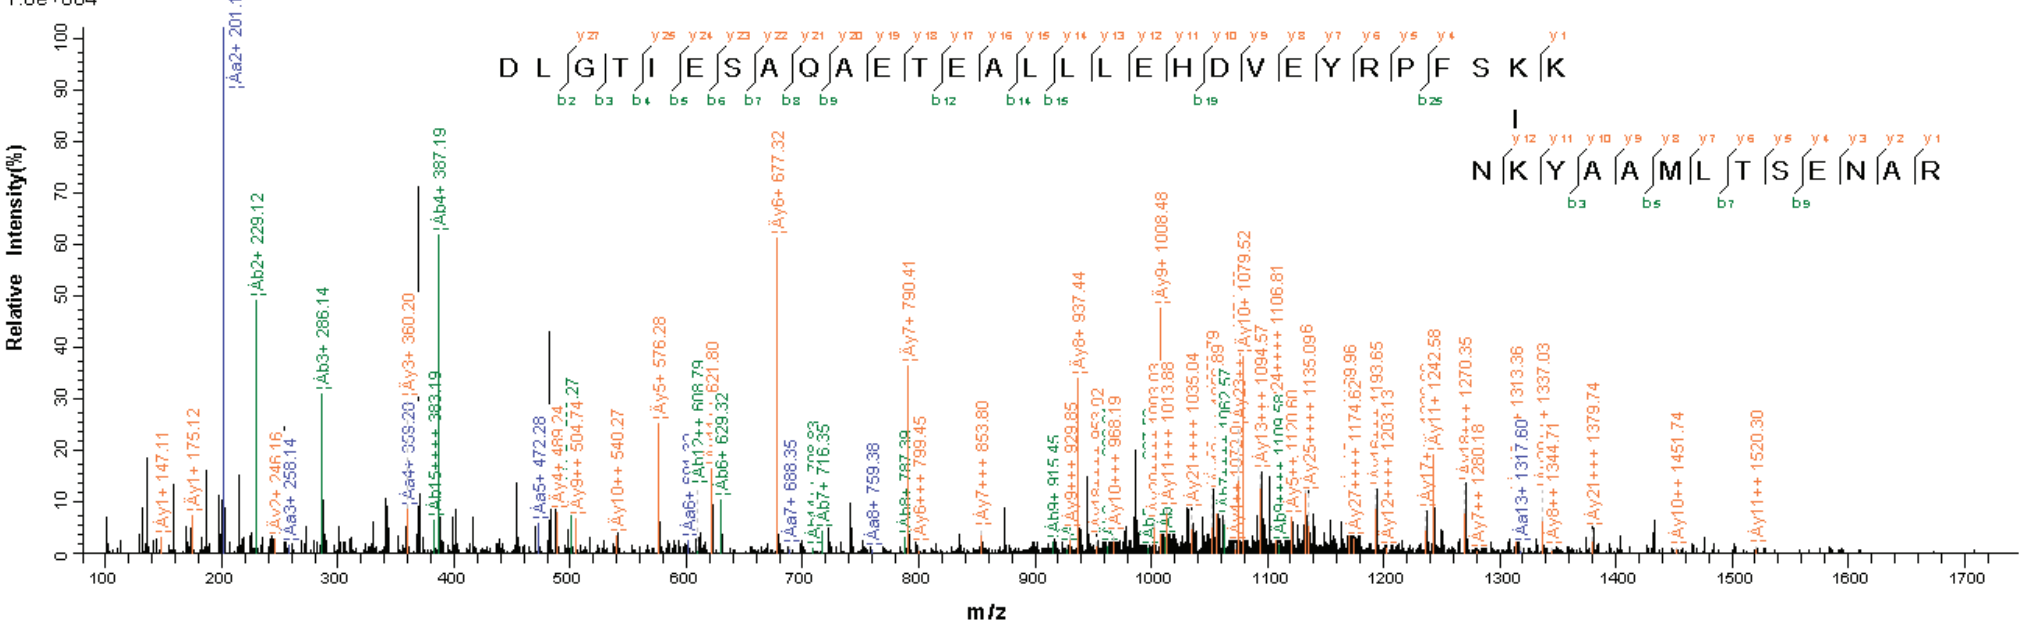

Seq: KIYDAFPQTAMLR-DGVLTVTLNKNR Mod: 11,\_Oxidation\_M\_15.995

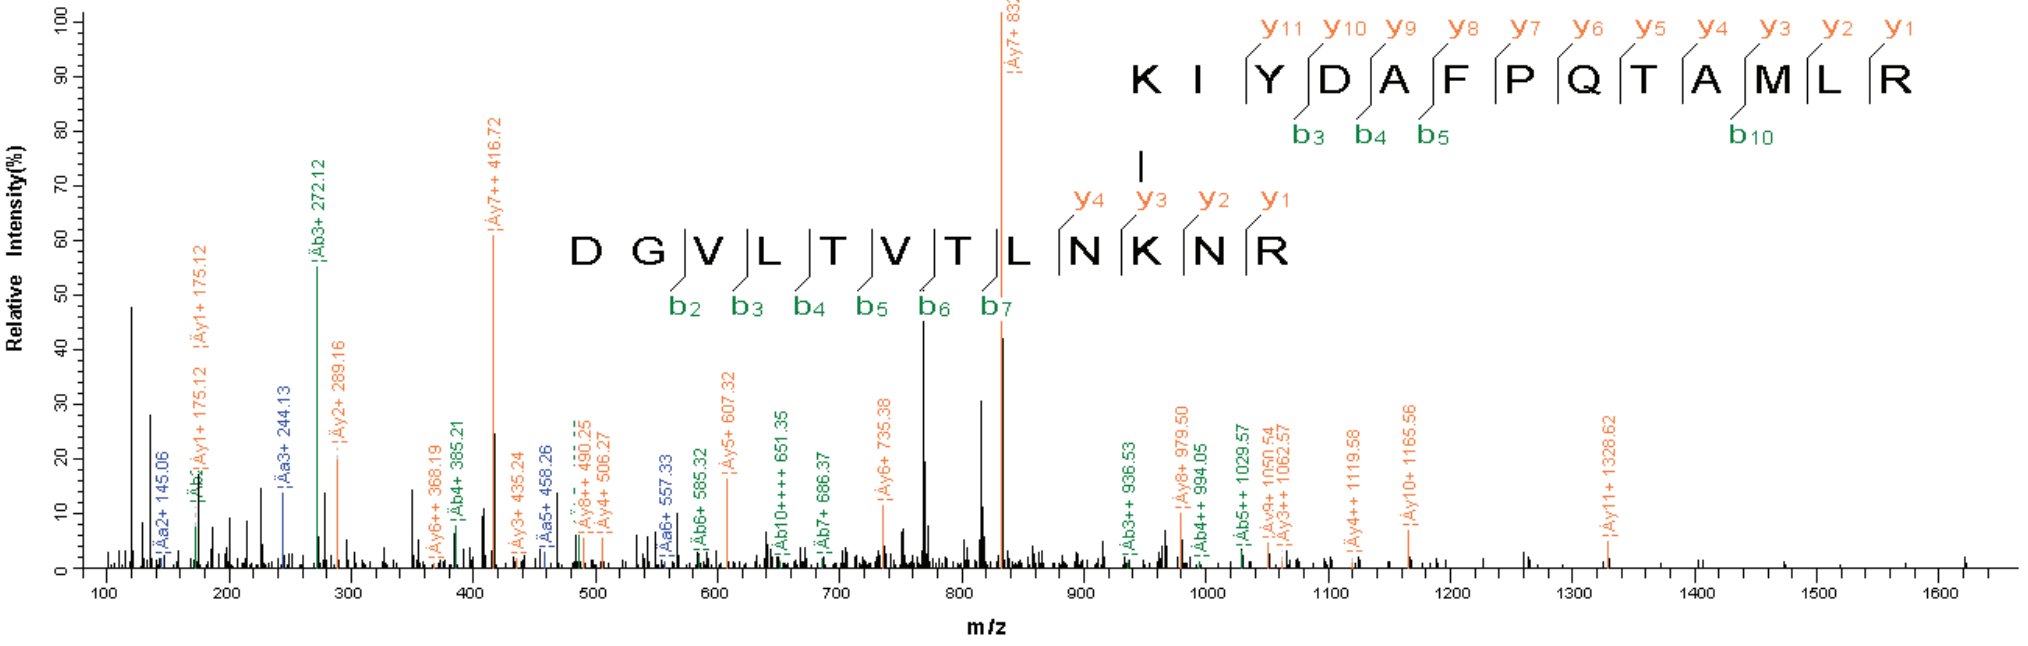

Seq: FSVSGEGEGDATYGLTLK-NDTAAFKDIK

2.8e+003

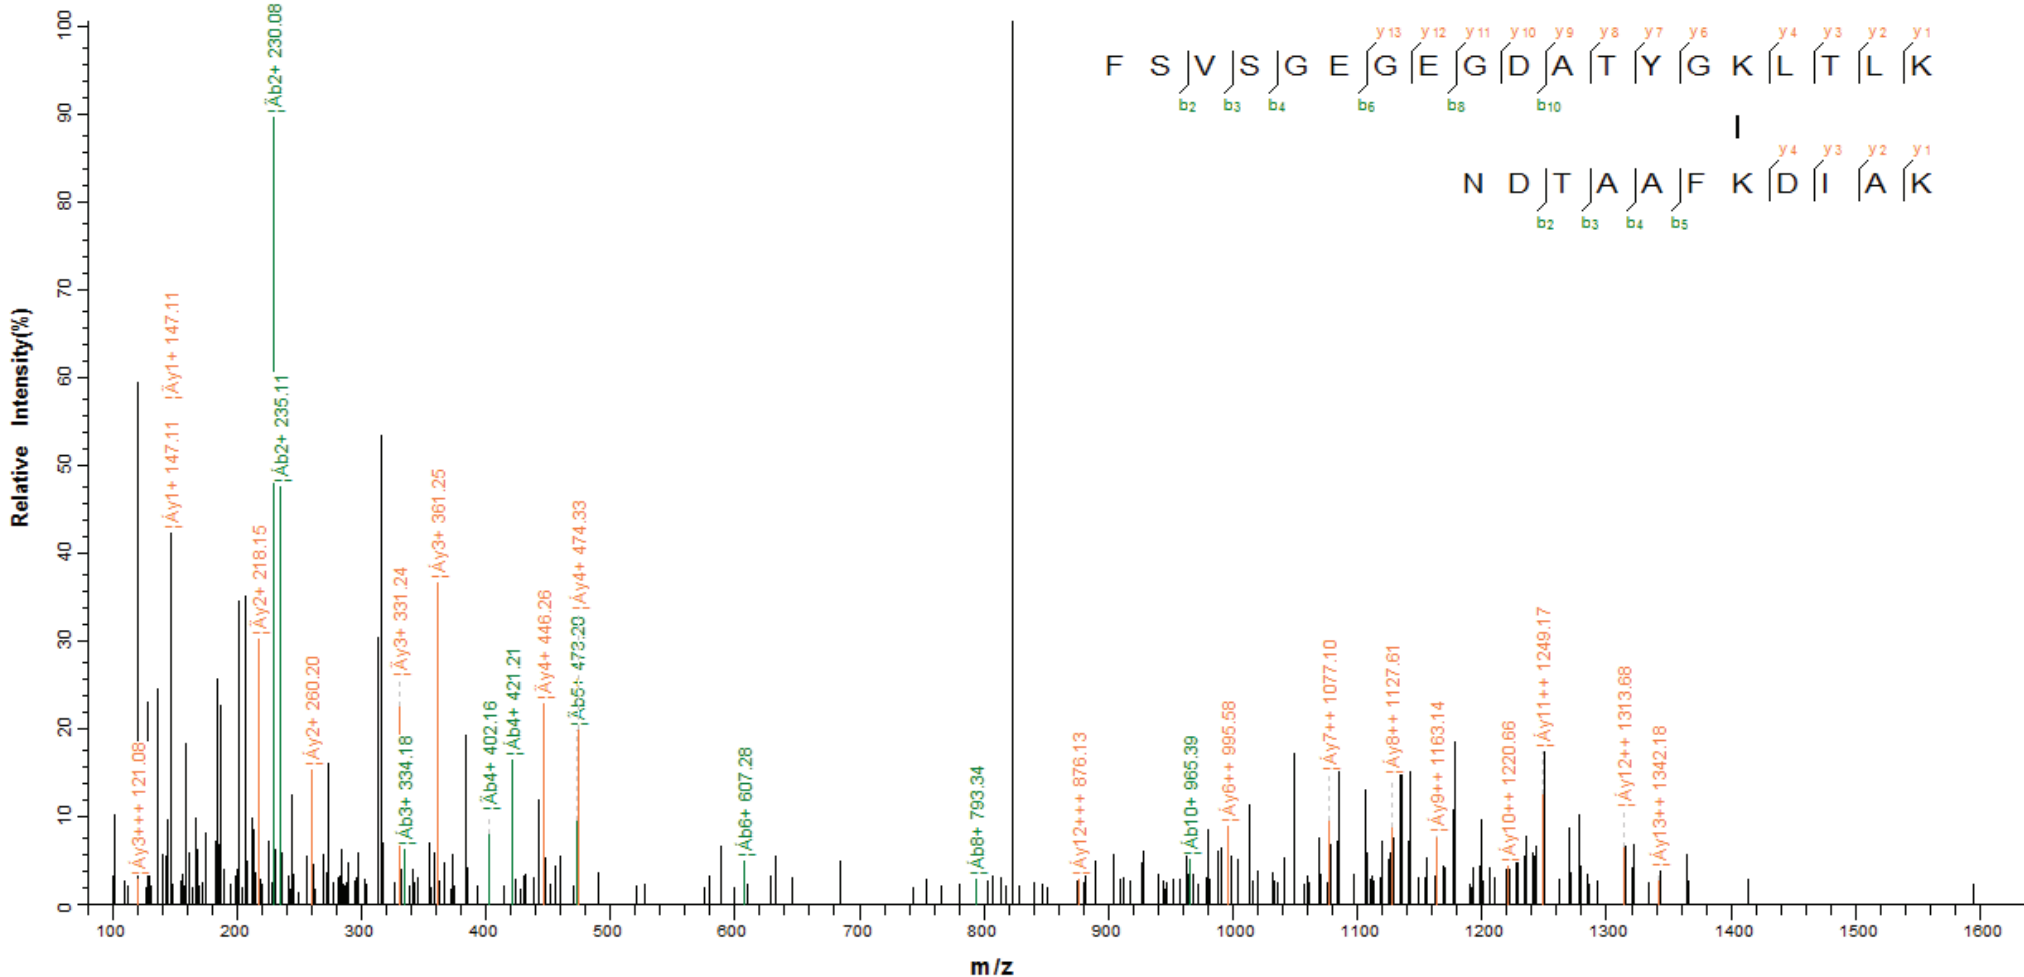

Seq: FSVS<sup>+</sup>GEGGDATY<sup>+</sup>GKLT<sup>+</sup>LK-DIAKR

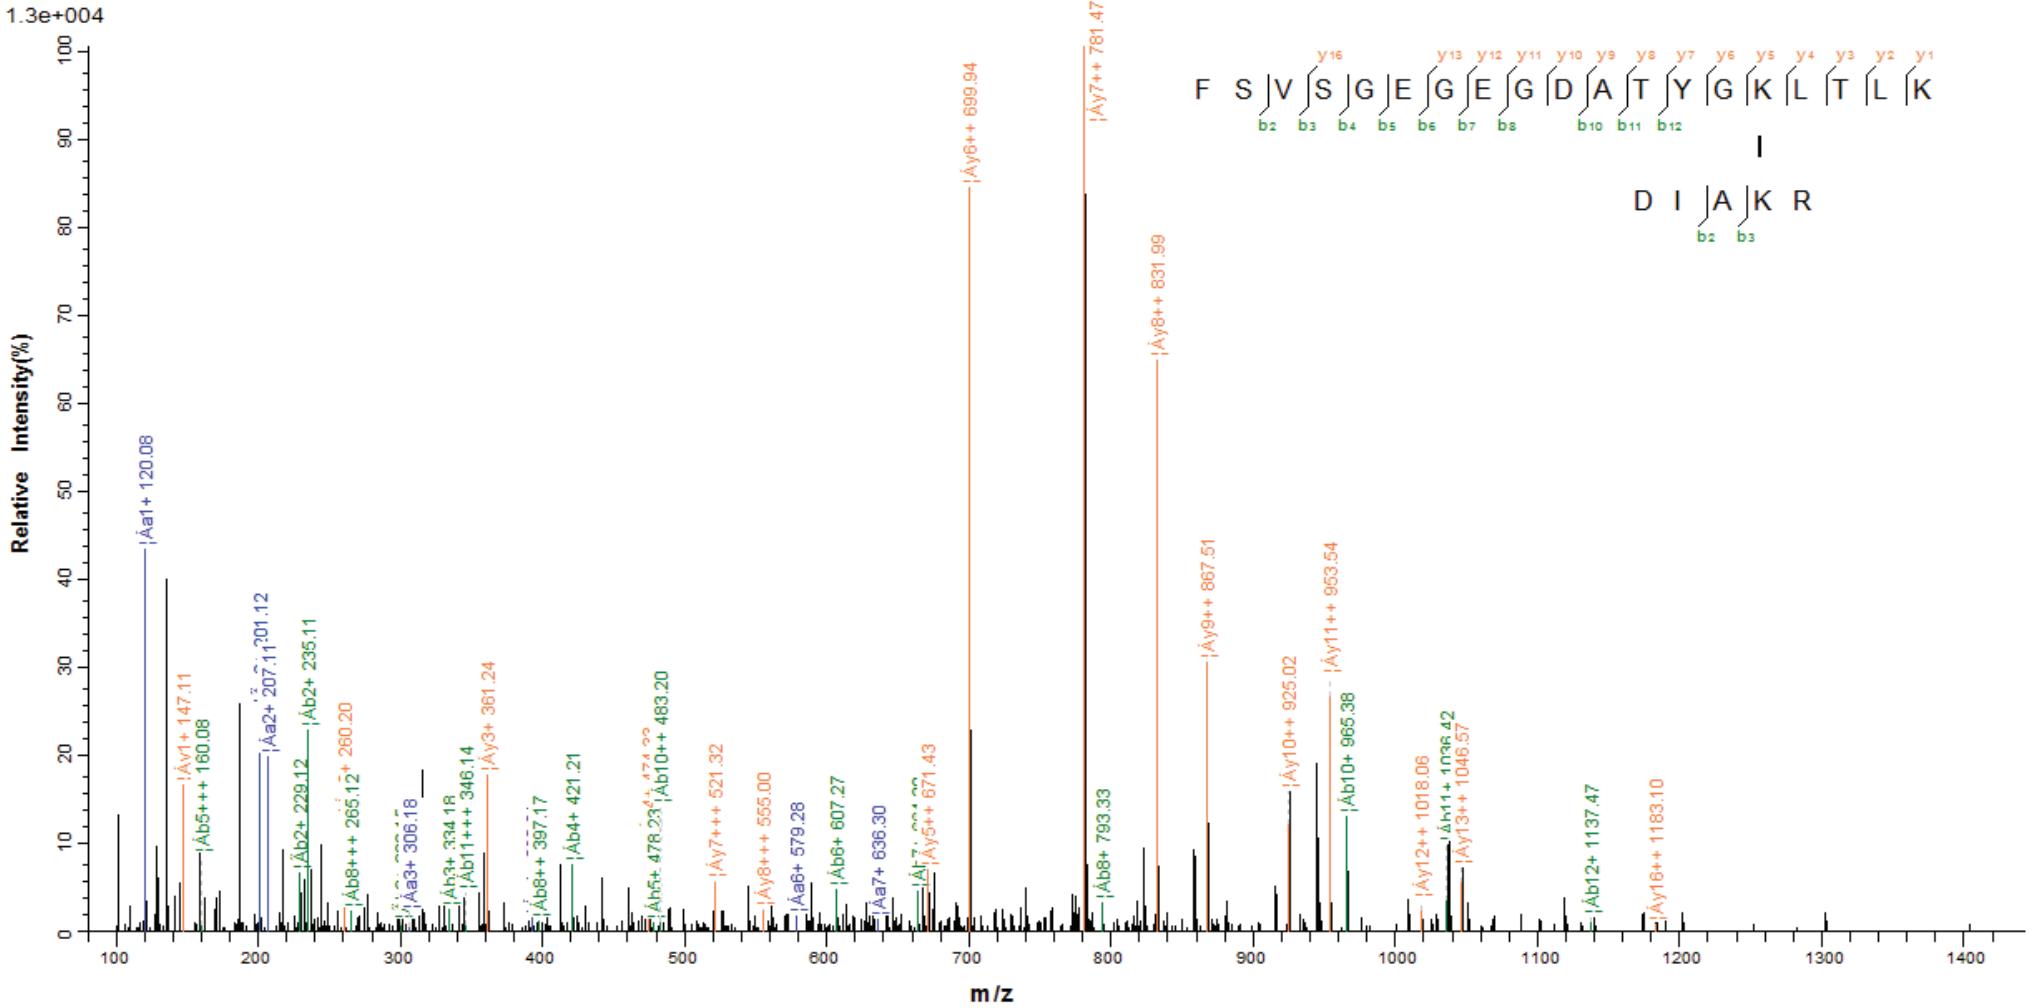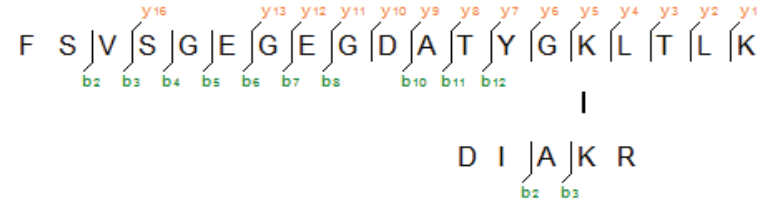

Seq: SNEKSQAEQEK-LNCAINSKR Mod: 17,C\_57

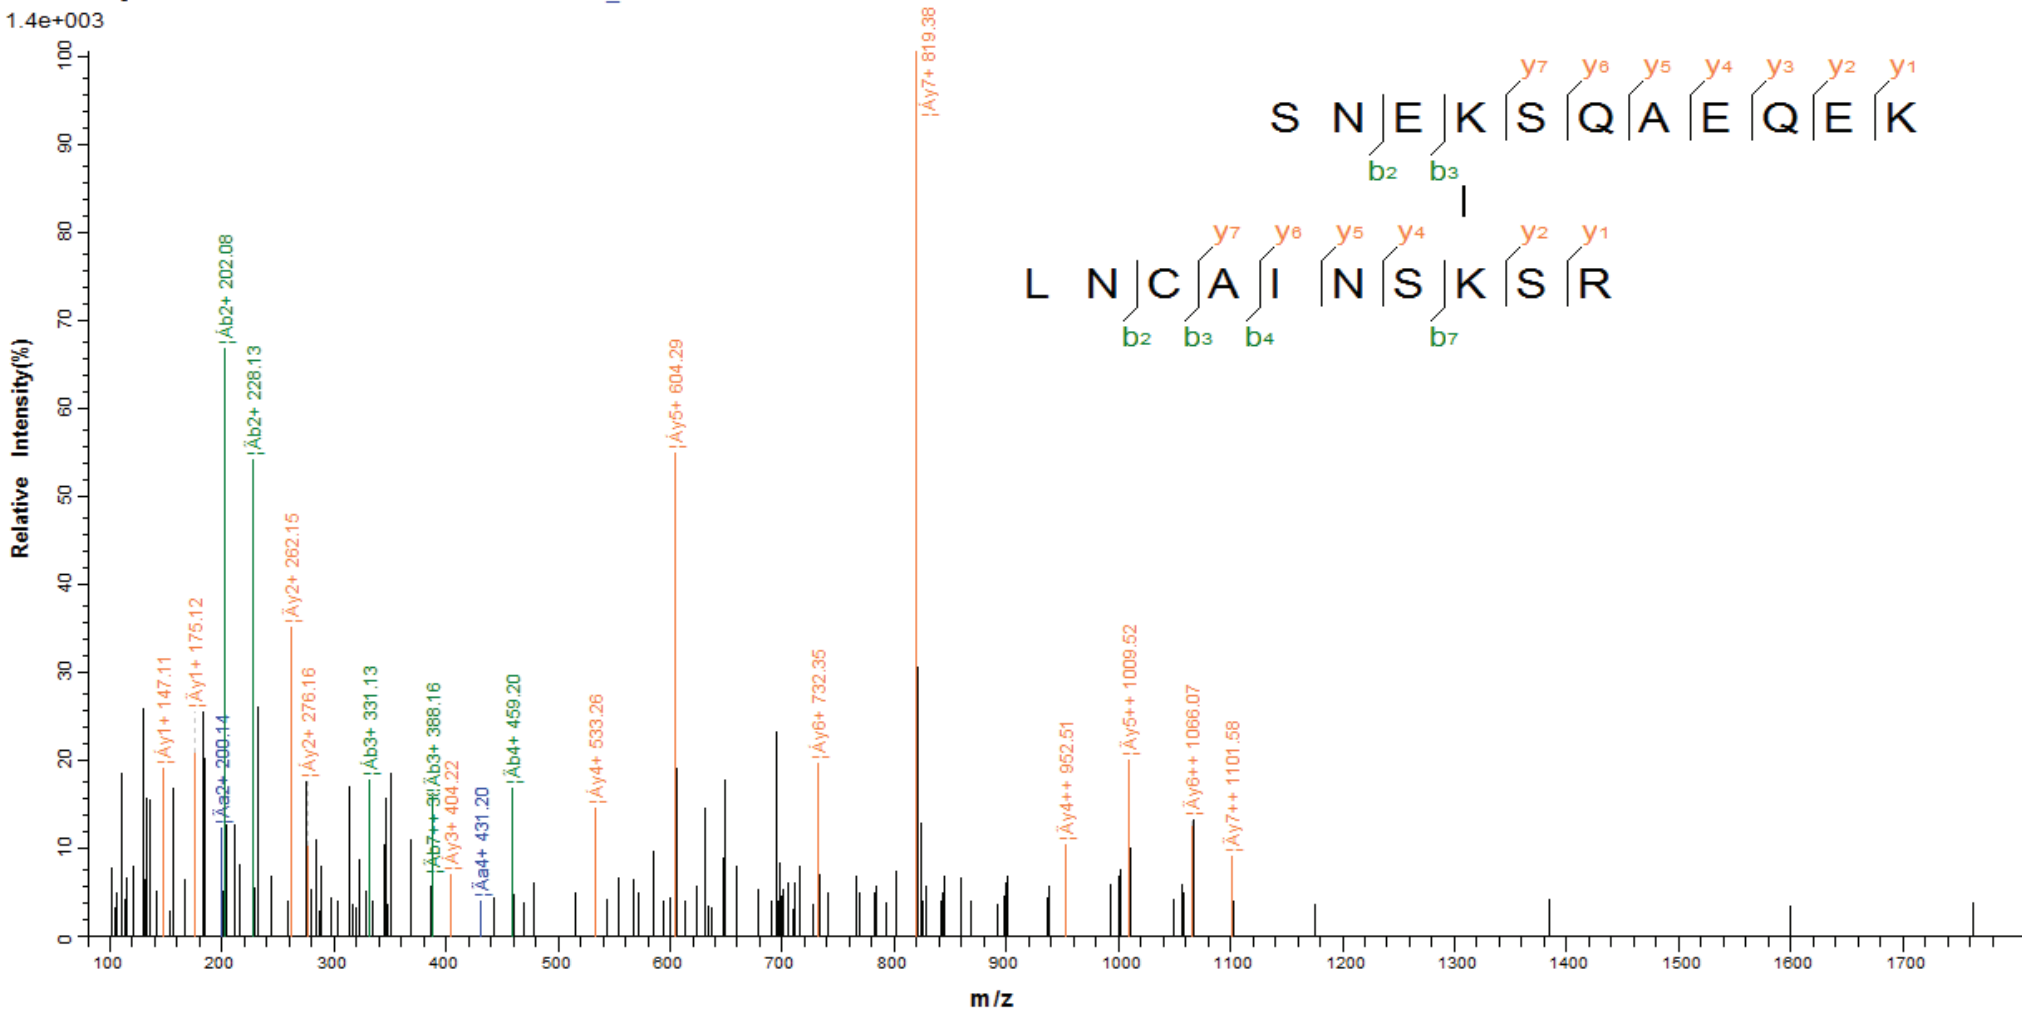

Seq: SNEKSQAEQEK-NKLIESNK

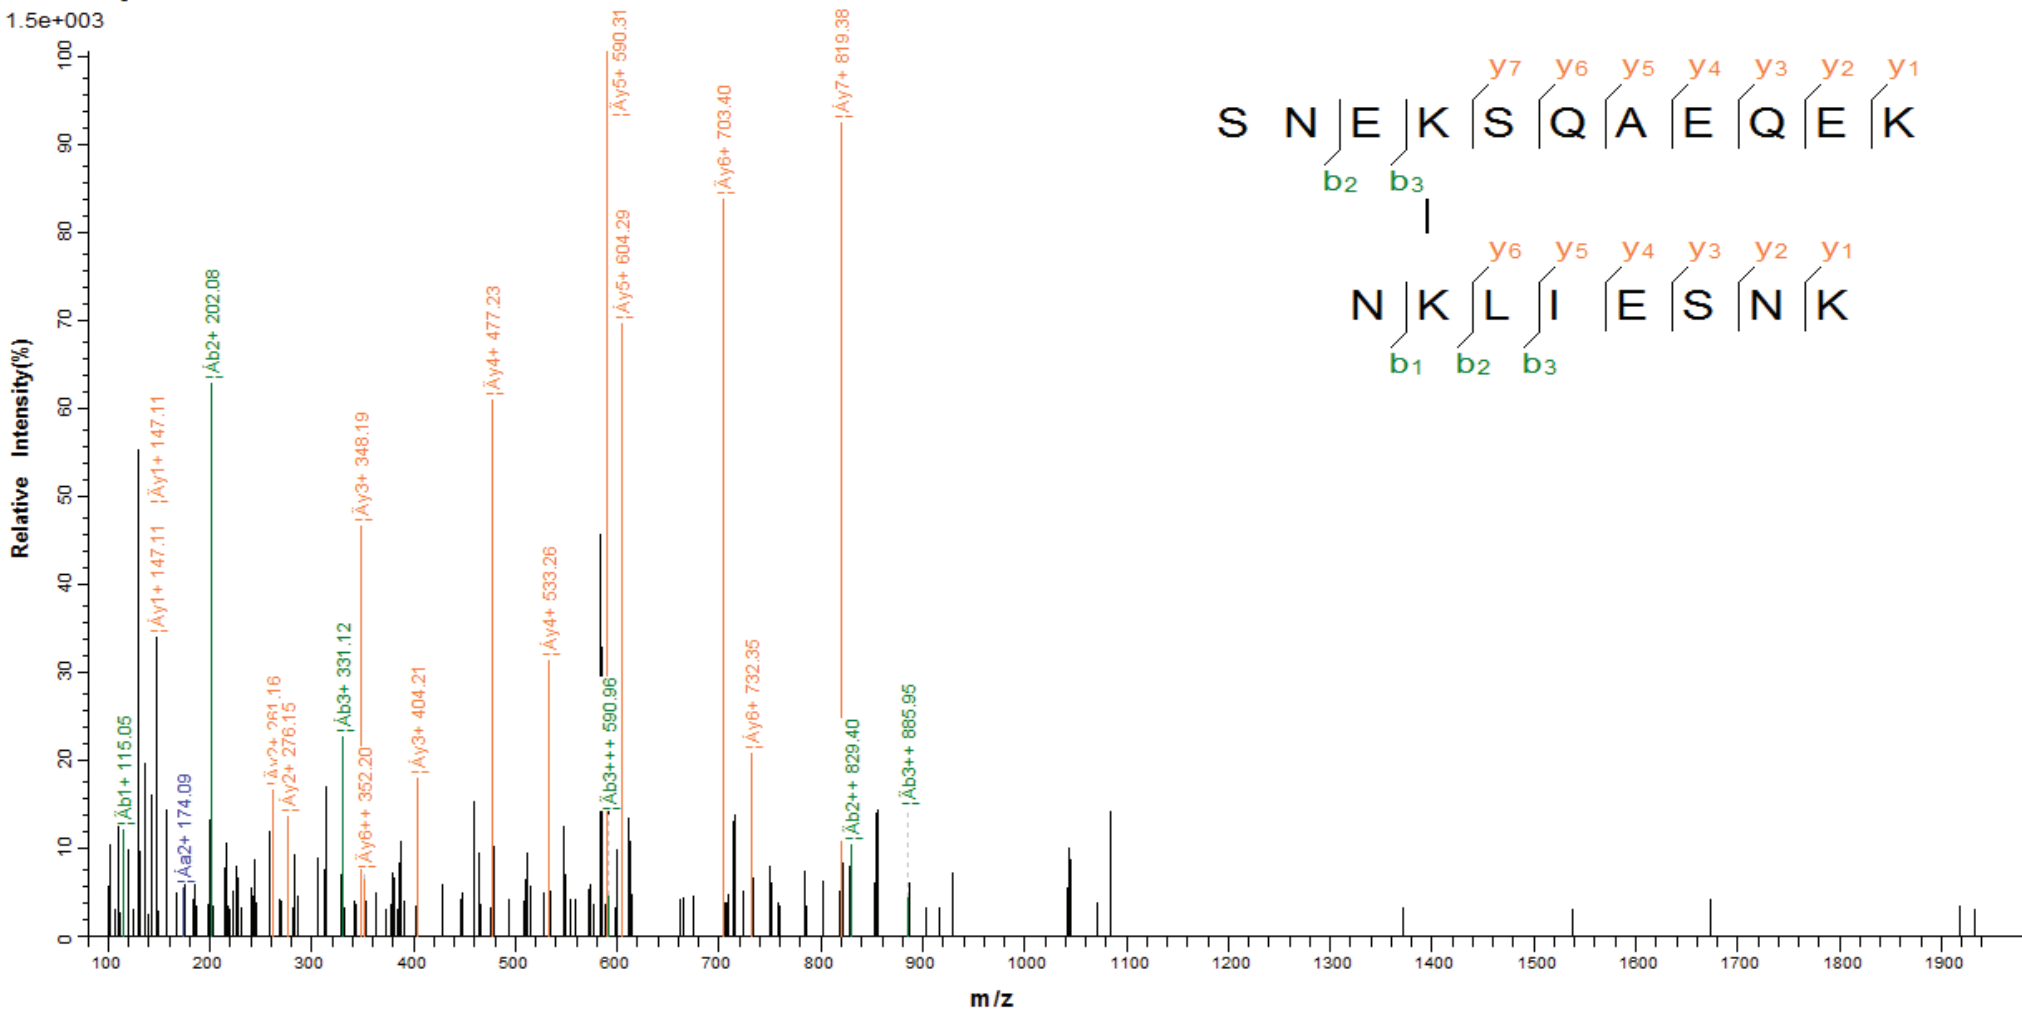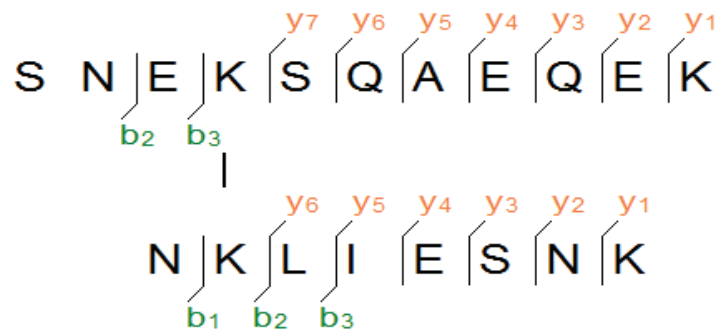



Seq: SQAEQEKAK-NKLIESNK

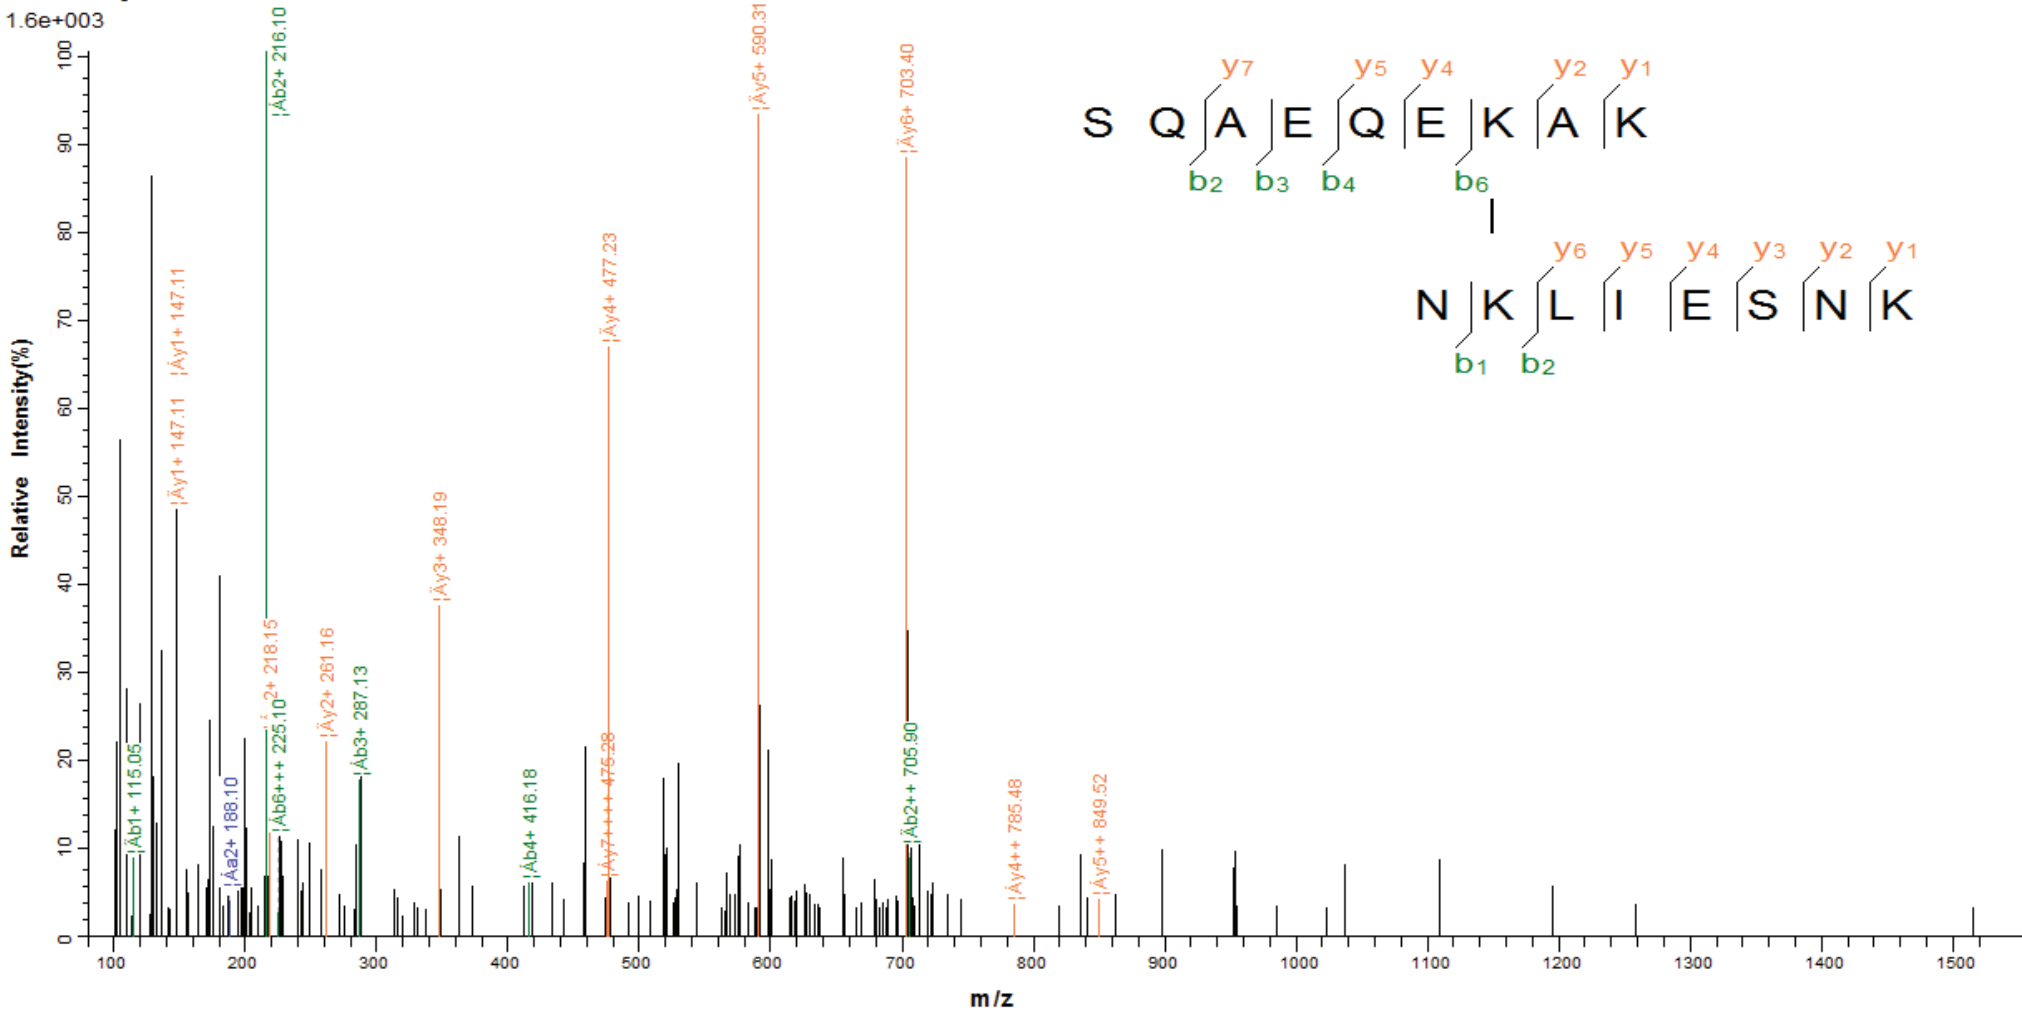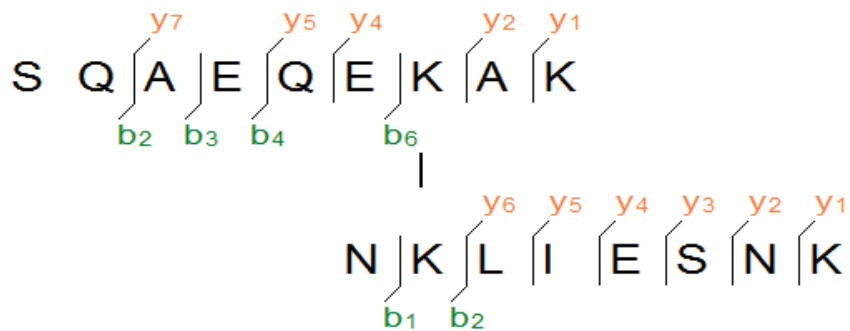

Seq: HTKFENDELAESTTTK-NKLIESNK

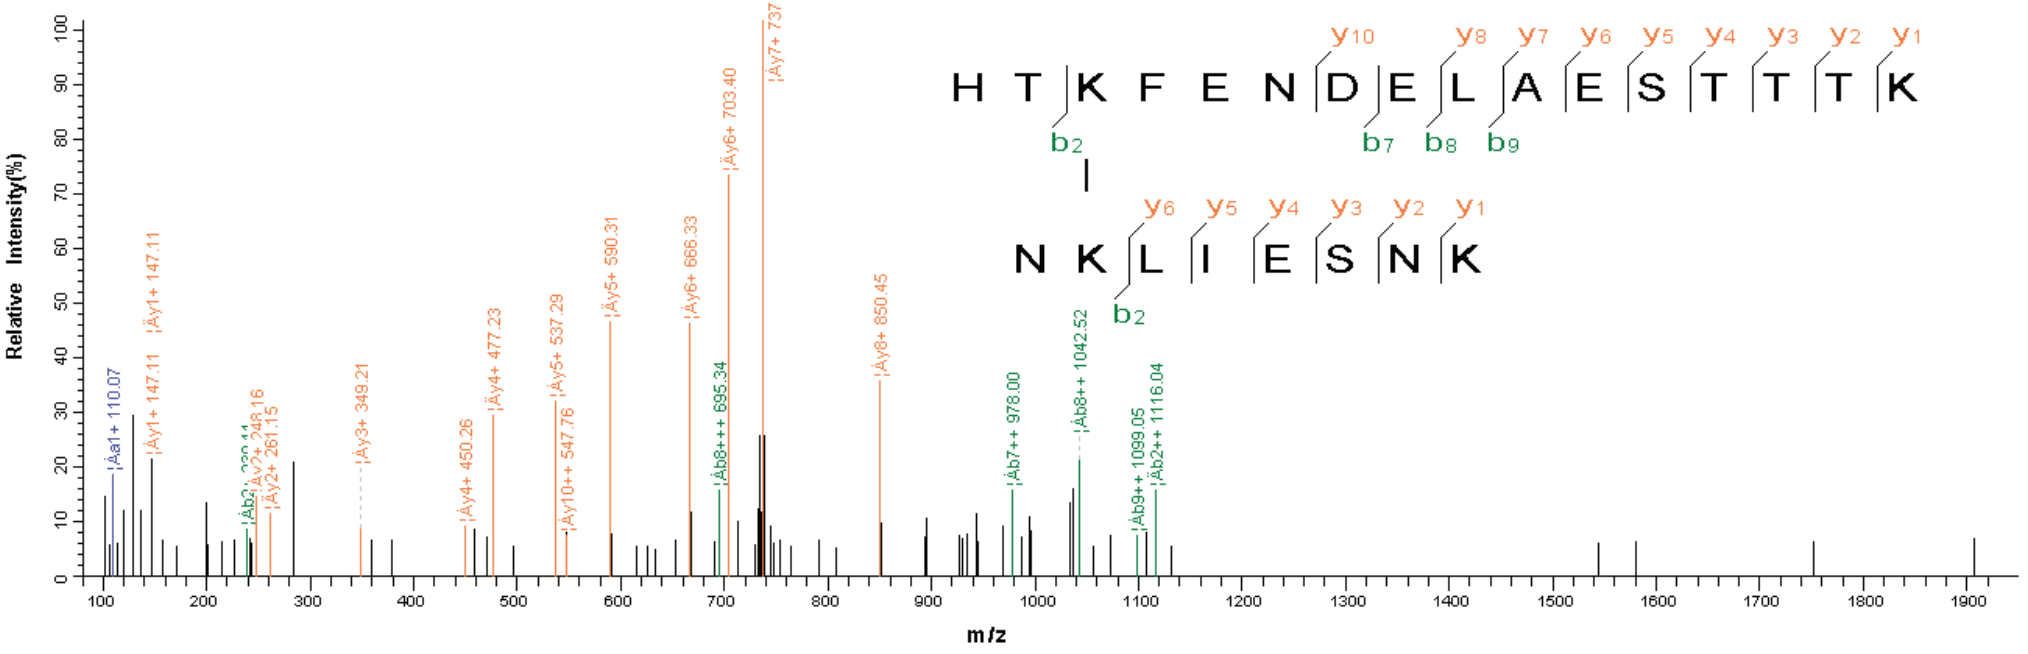

seq: SFSKALDELKPEIEK-SKADK

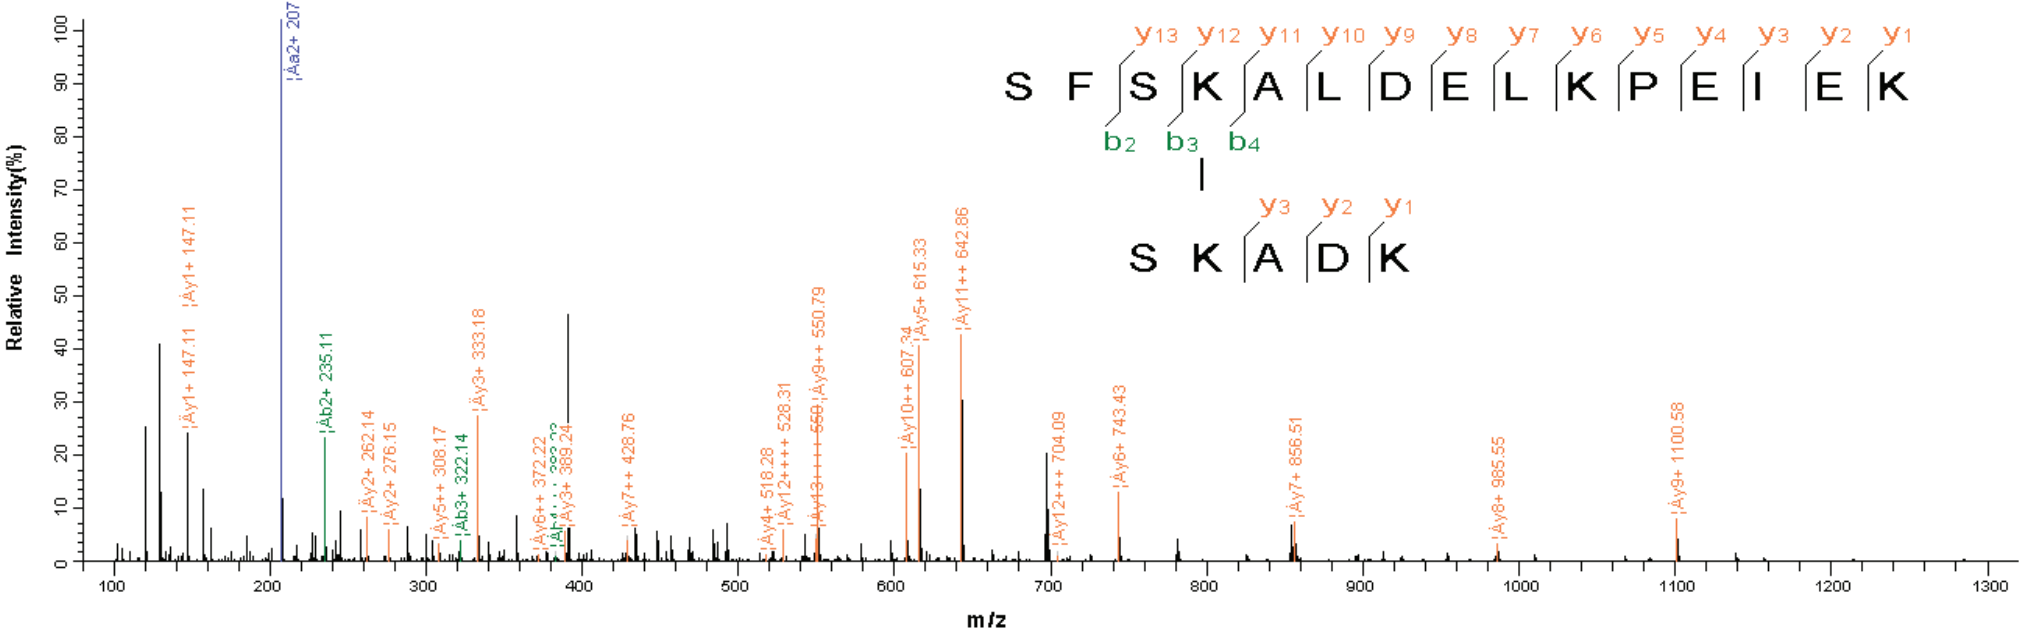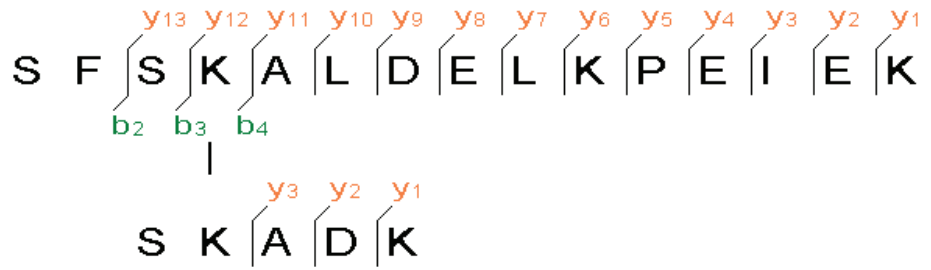

seq: ALDELKPEIEK-SKADK

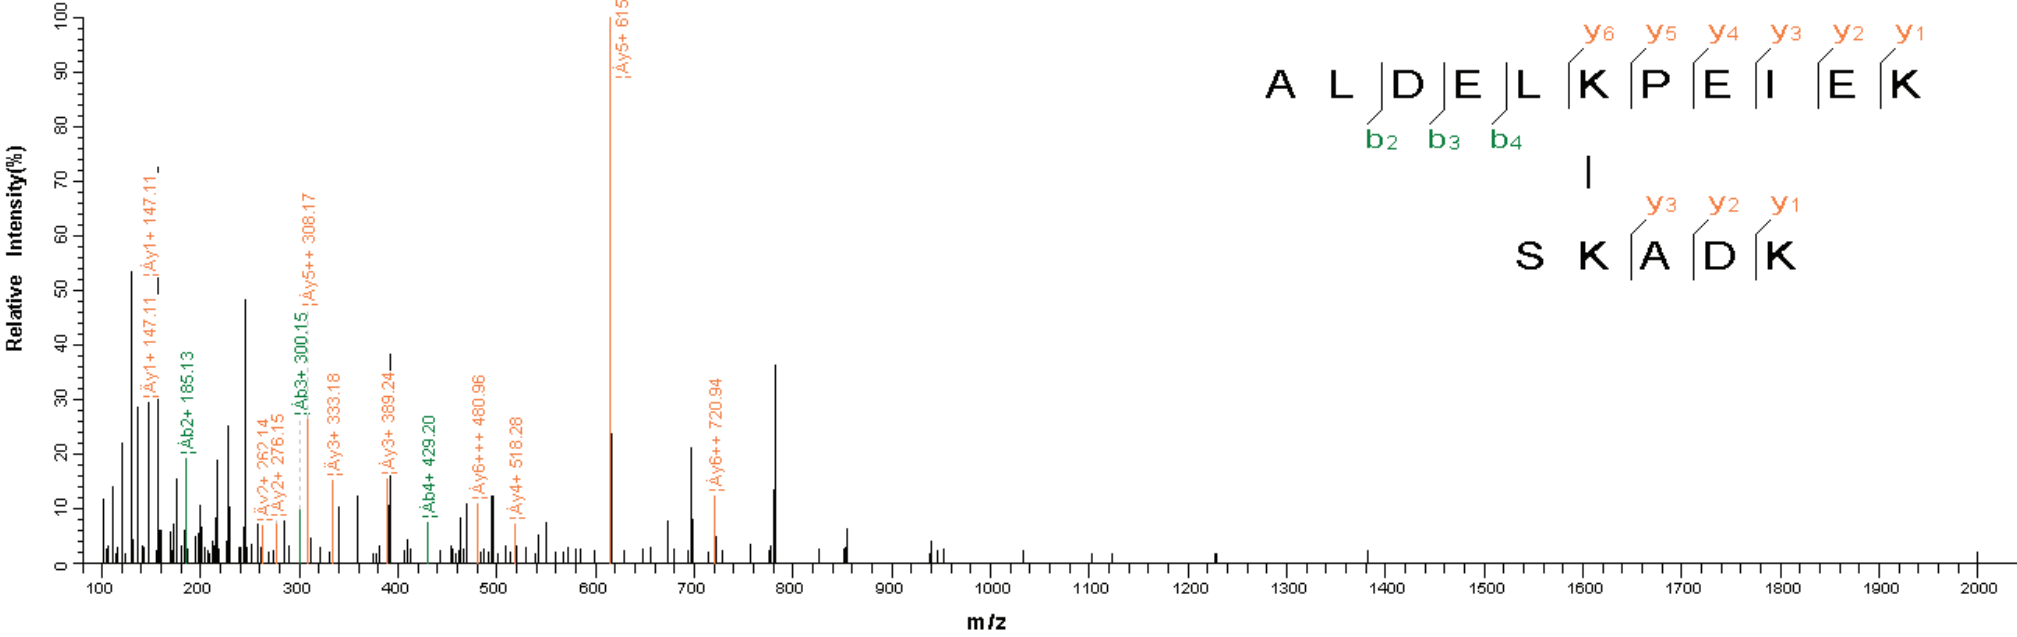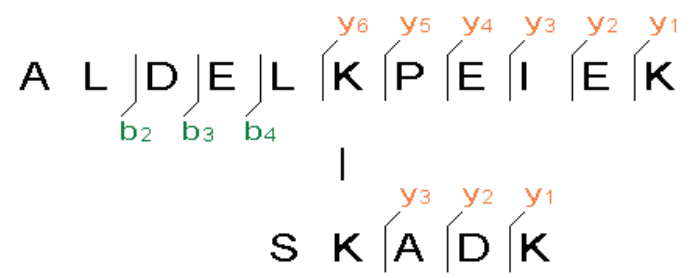

exosome\_A9\_140503145423.1360.1360.4.dta Seq: IKPYVR-SKADK

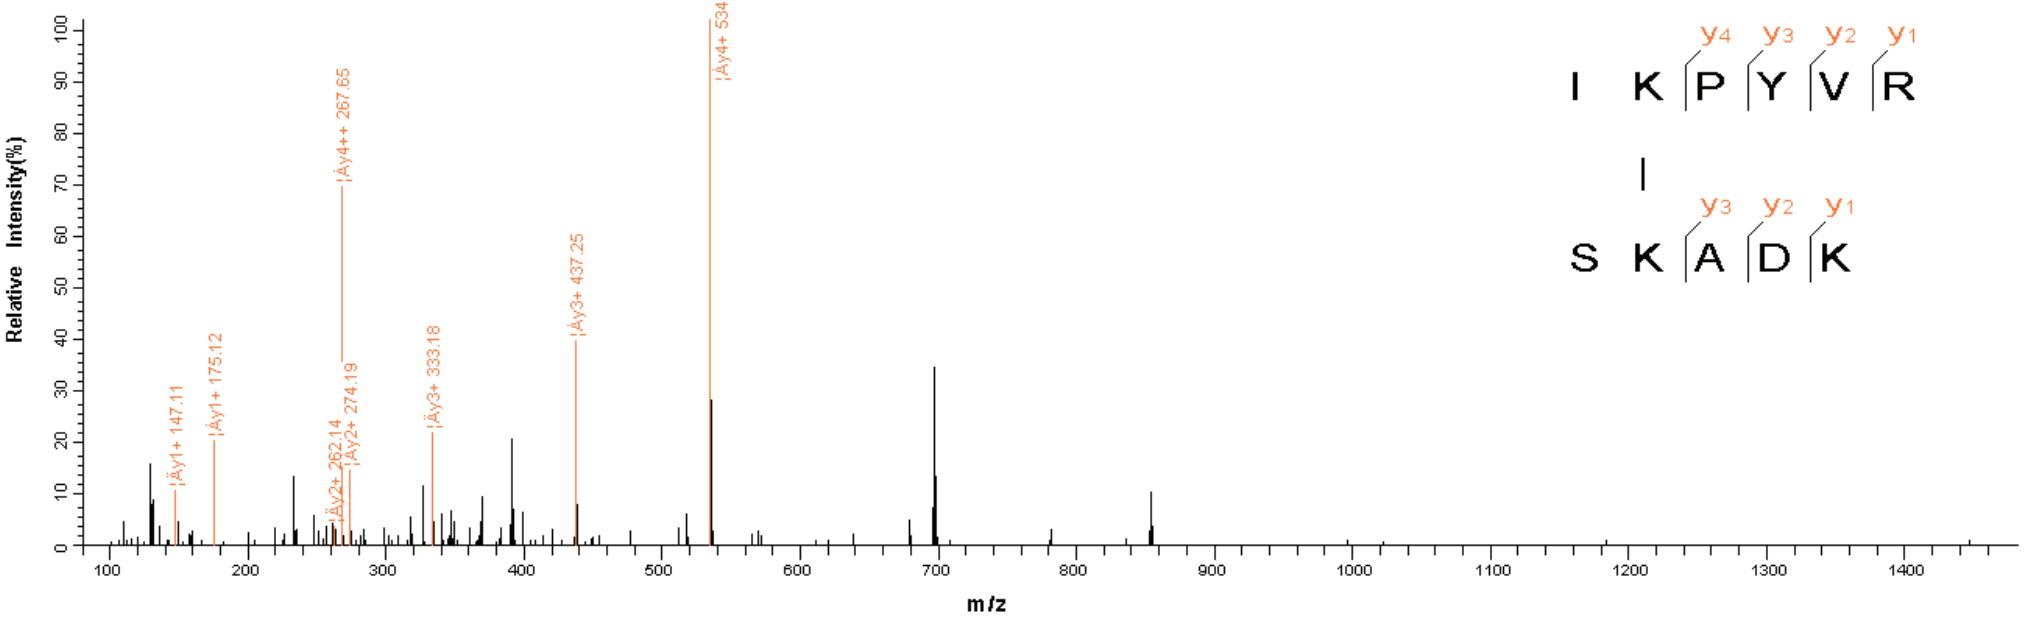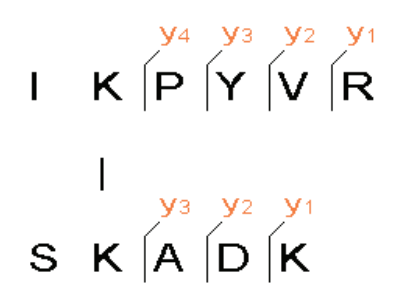

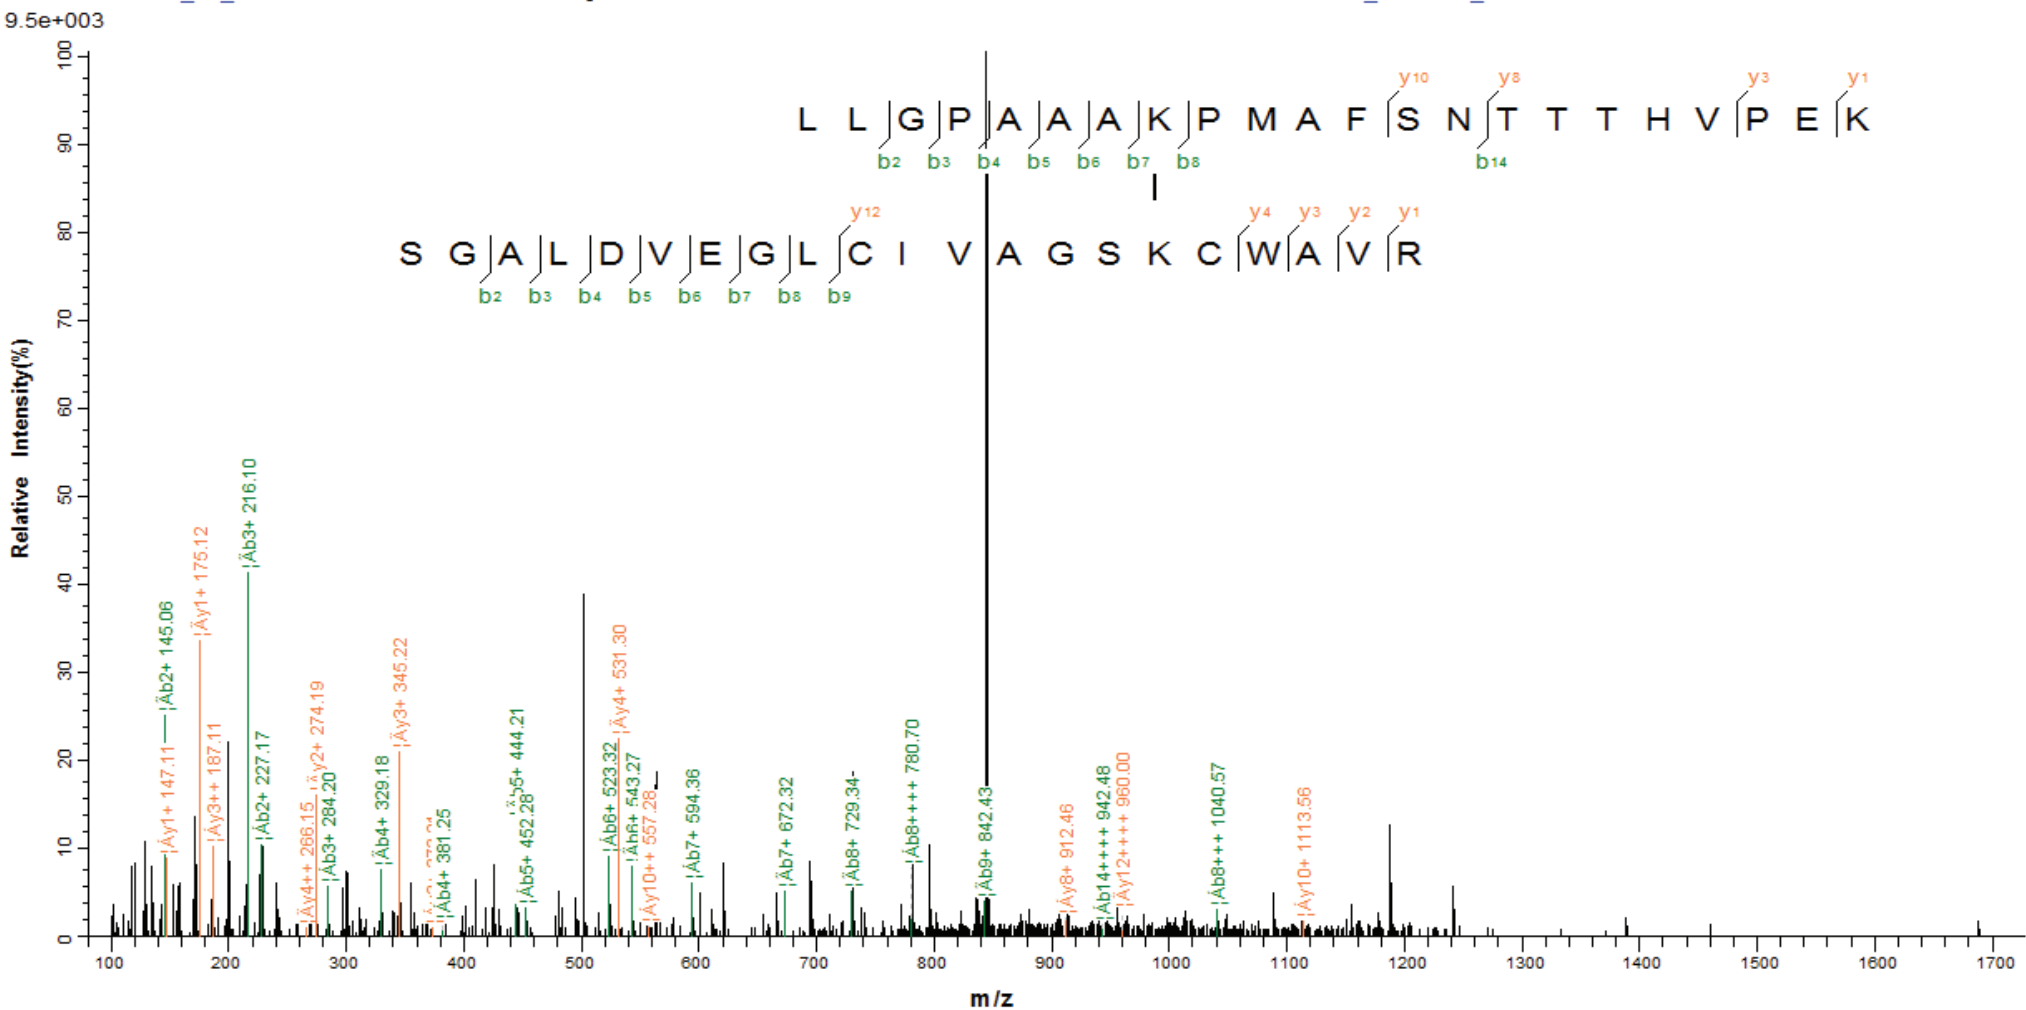

exosome\_A8\_1.003784.003784.6.dta Seq: LLGPAAAKPMAFSNTTTHVPEK-SKSSHKNER

3.2e+003

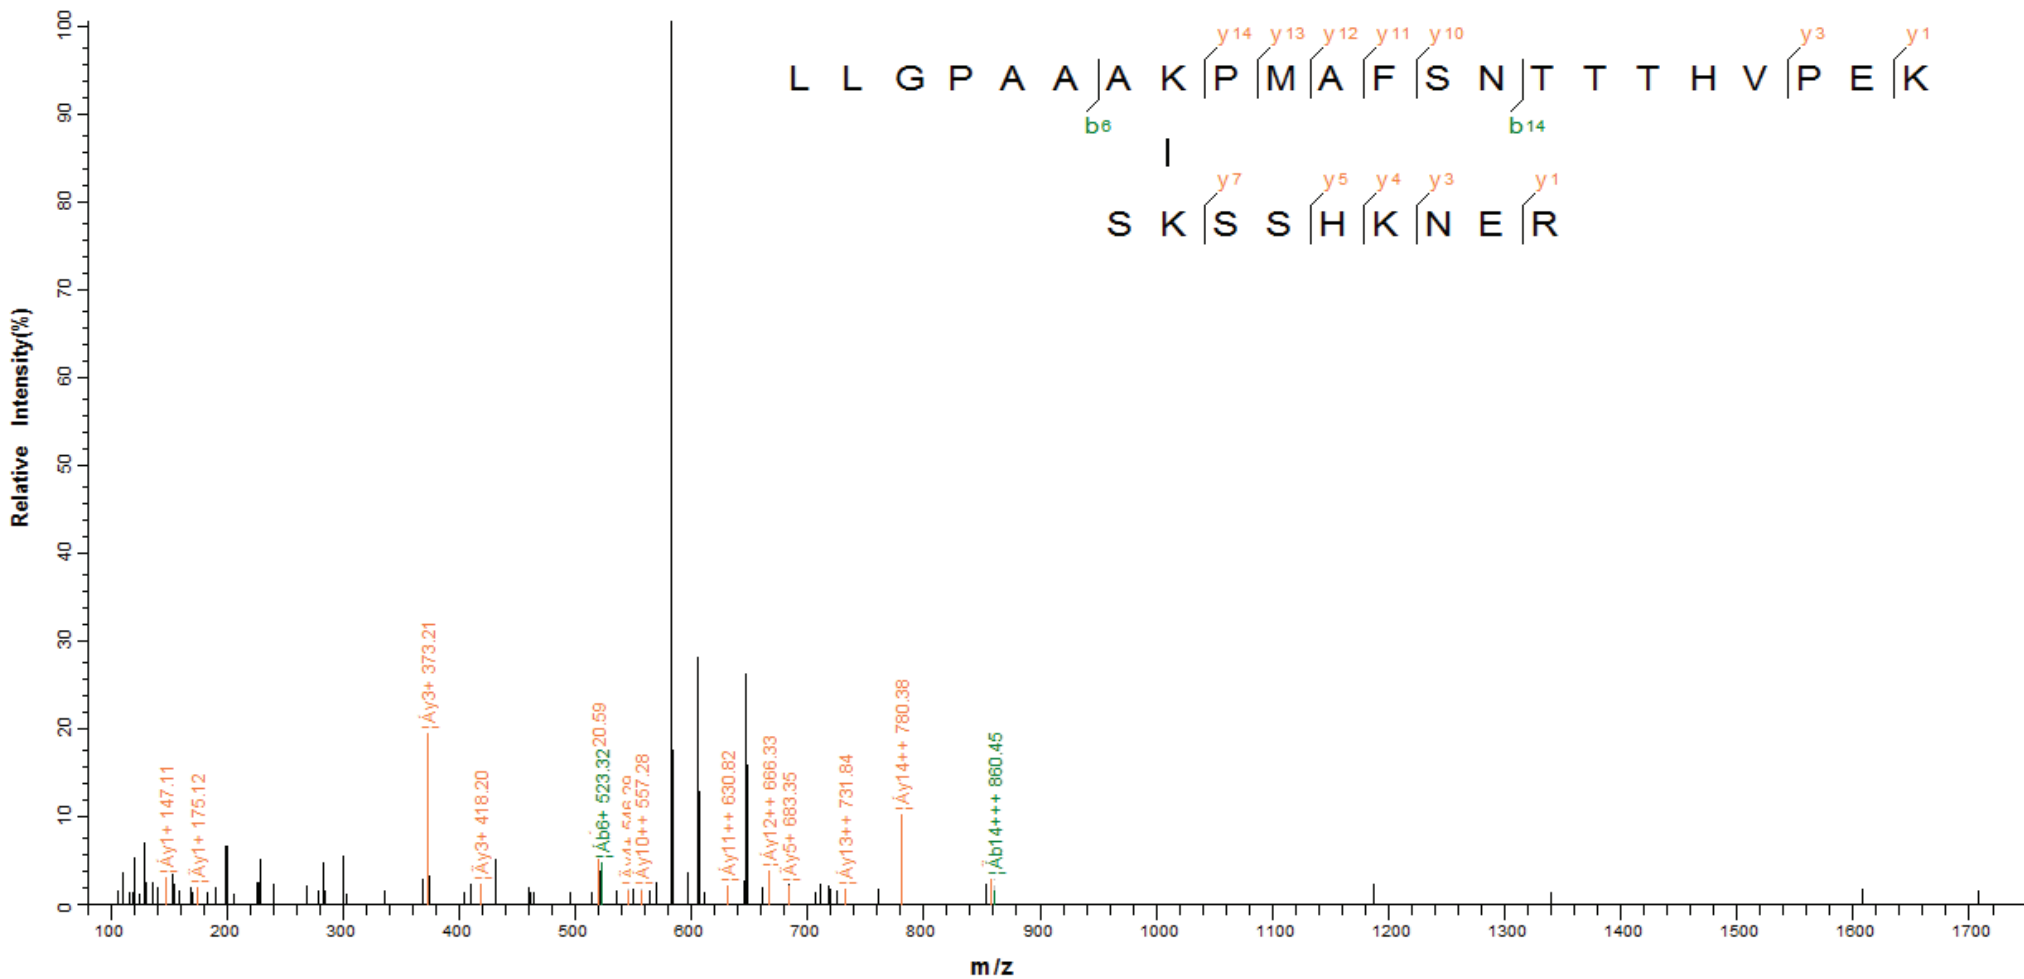

exosome\_A9\_140503145423.1521.1521.4.dta Seq: IAEVGNKR-GPKEPR

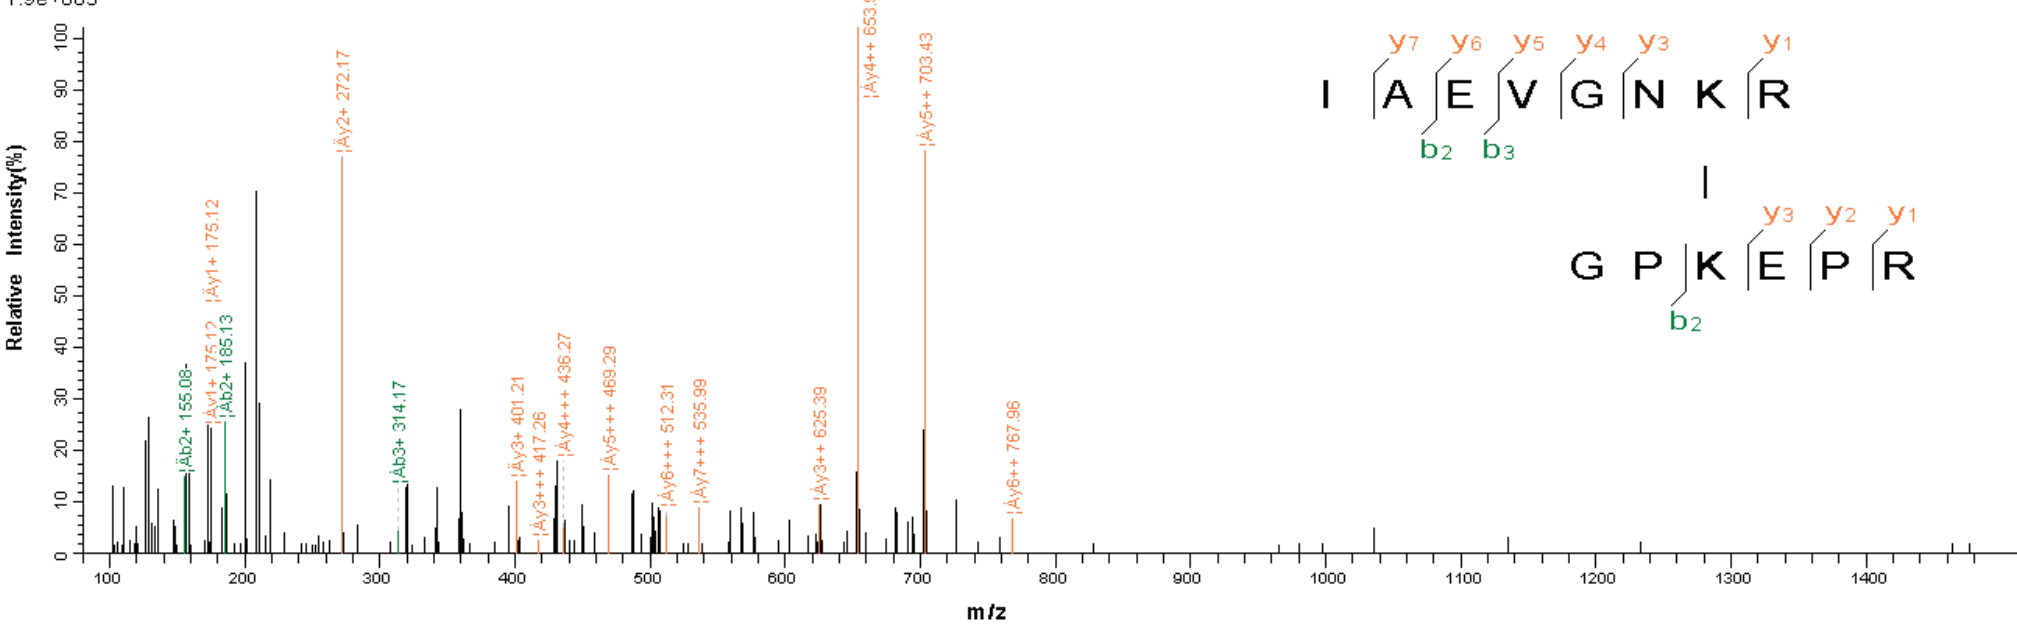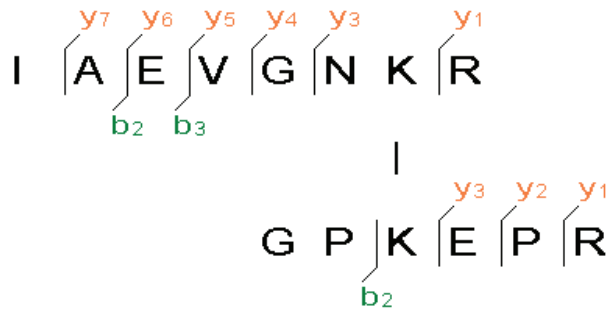



Exosome\_GFP\_test\_A9.000971.000971.4.dta Seq: IAEVGNKR-LHKNR

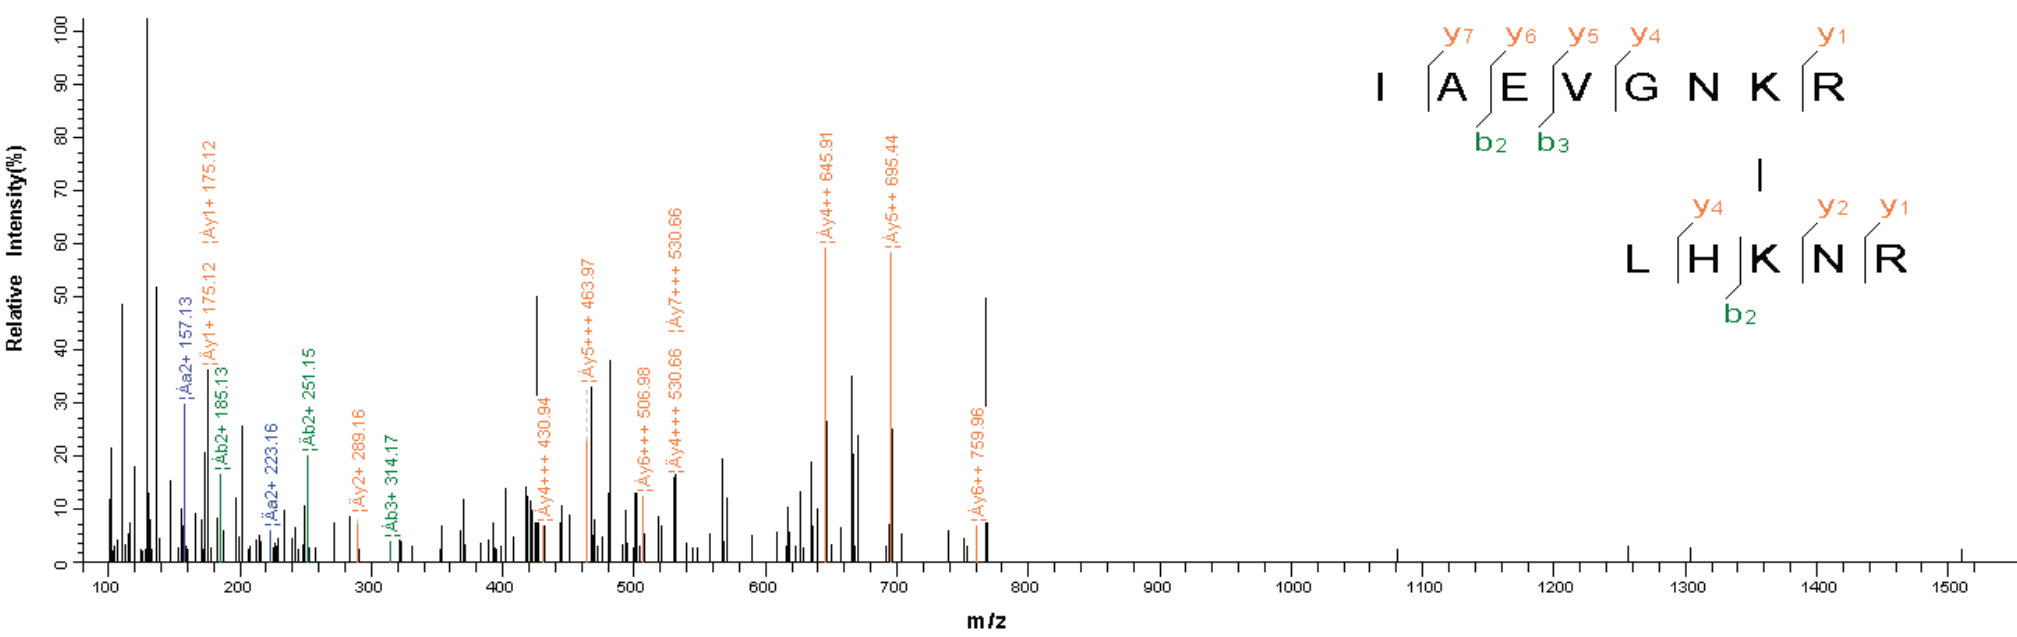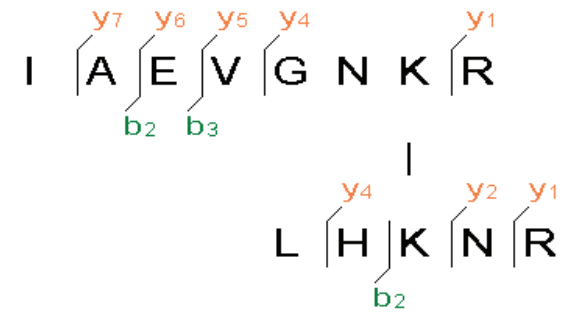

exosome\_A9\_140503145423.1953.1953.4.dta Seq: KSEDELQMR-KTDQEEER

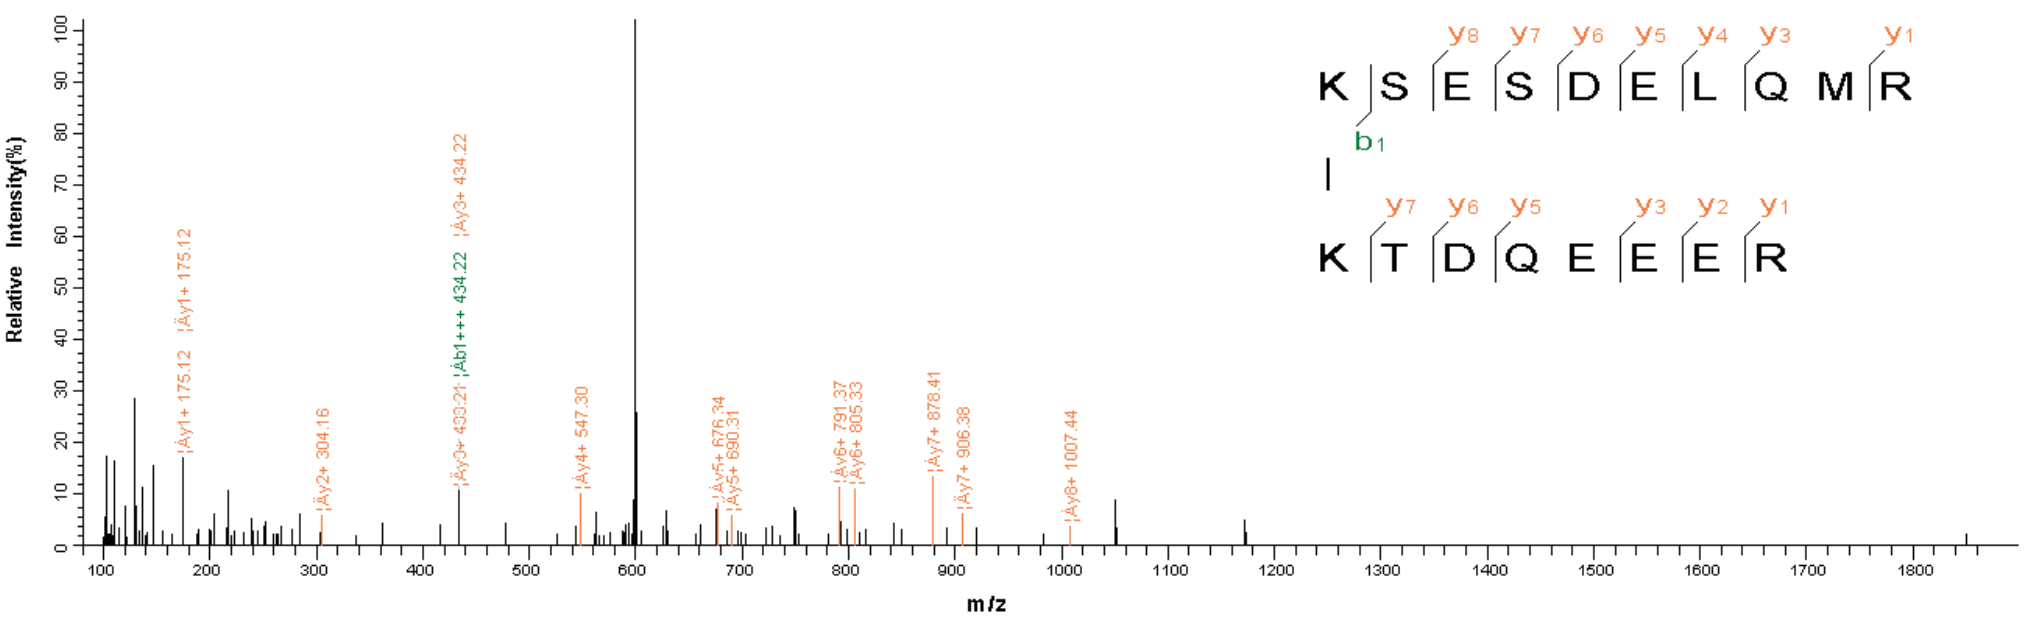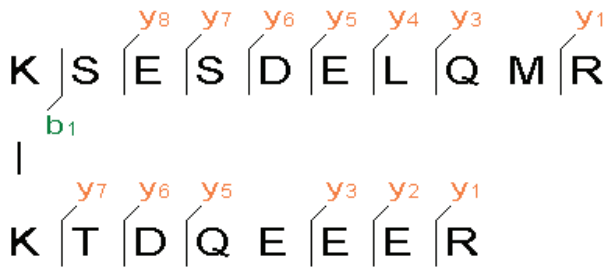

seq: KSSNLDPSSNSFK-VILDNTKTER

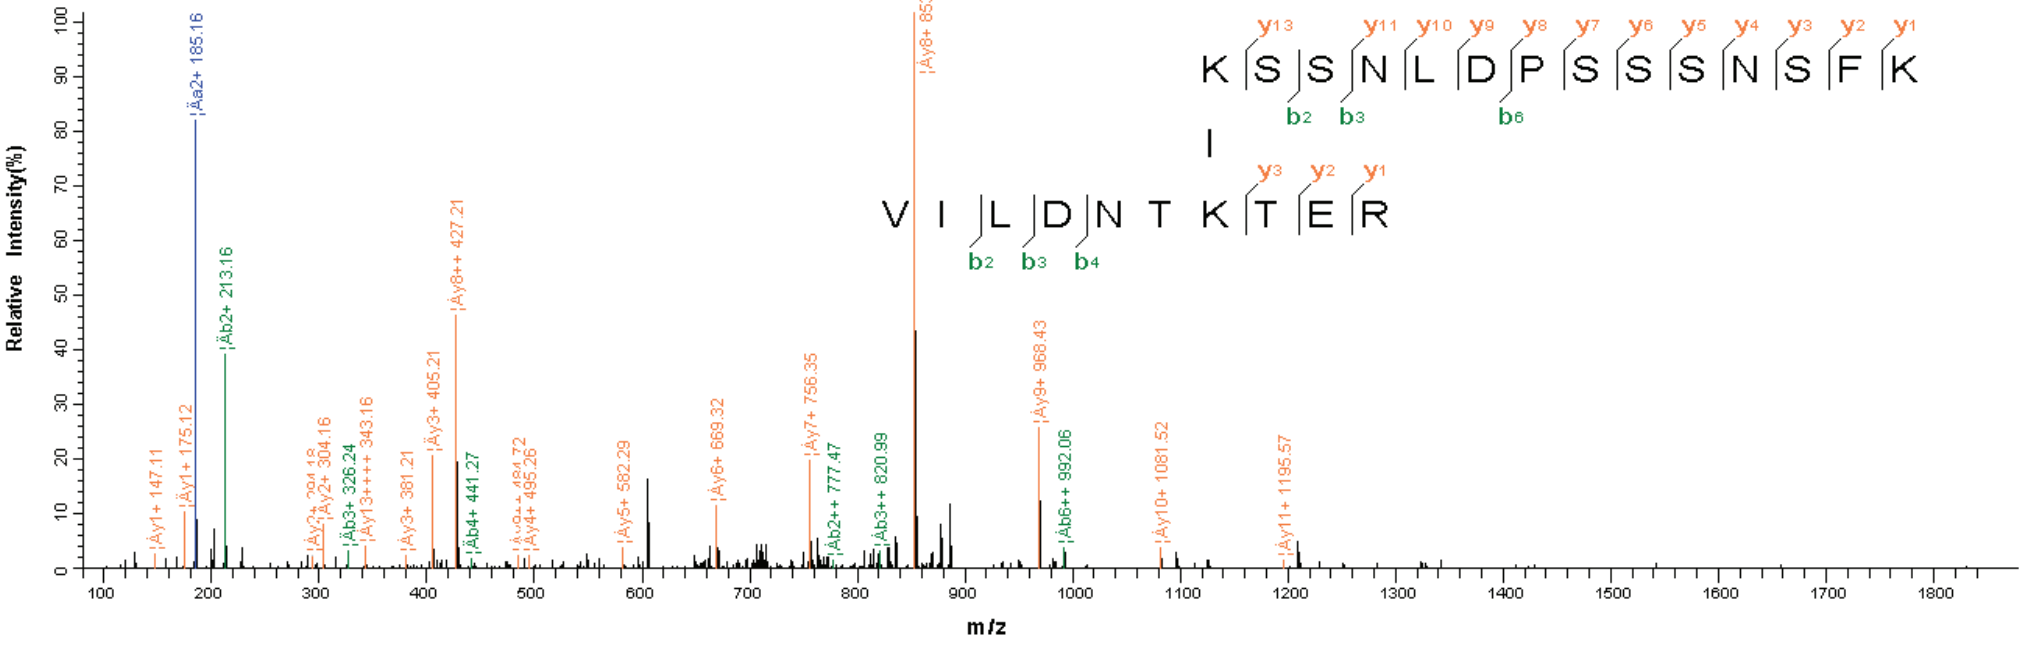

Seq: KSEDELQMR-KQFHIR

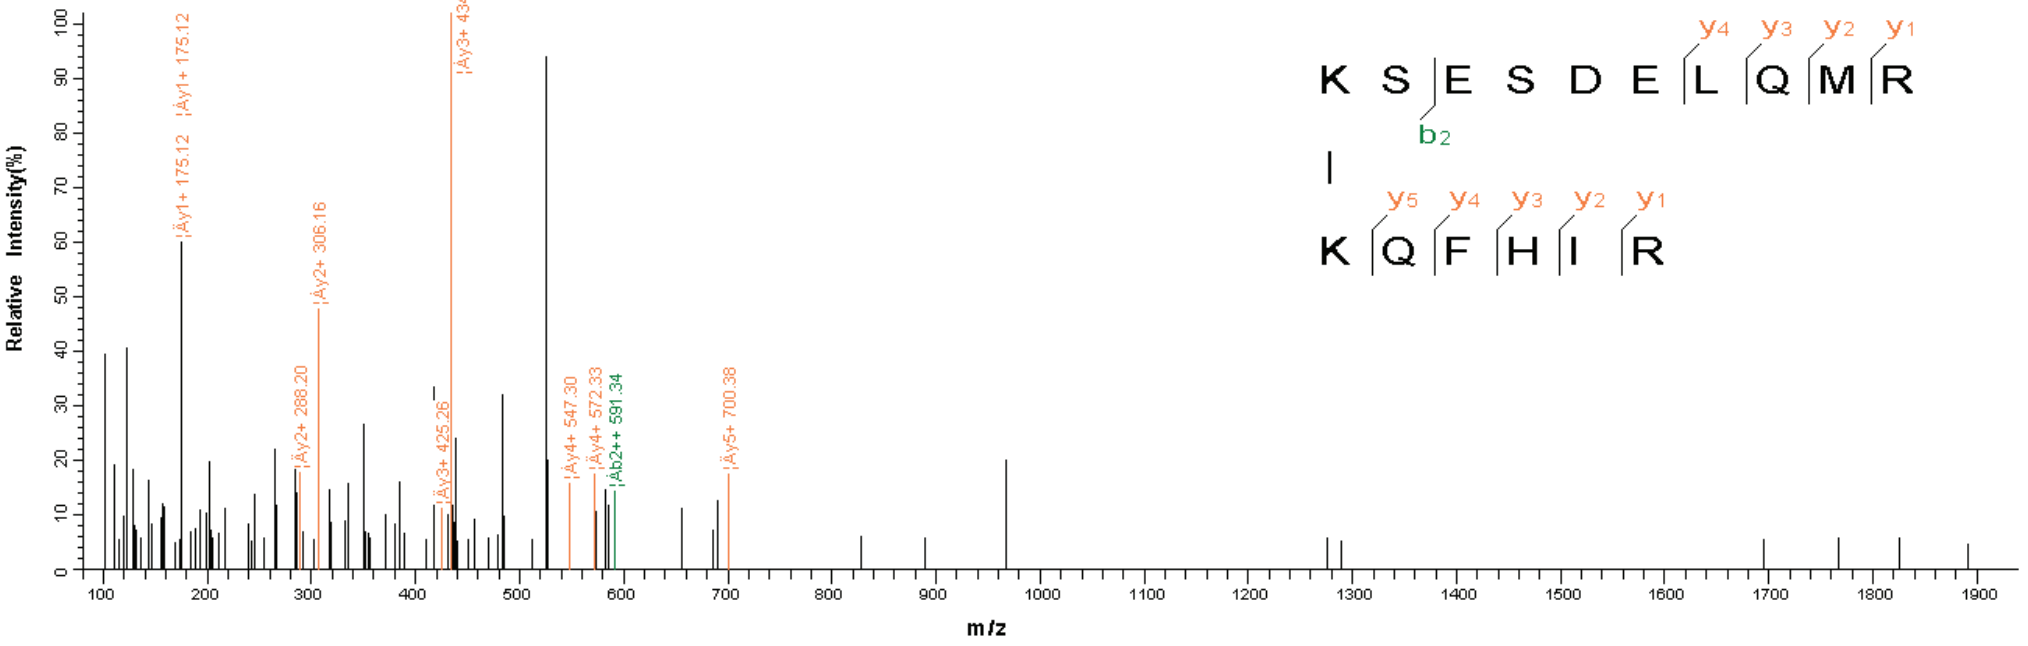

Seq: KSEDELQMR-KNSDLEK

3.2e+003

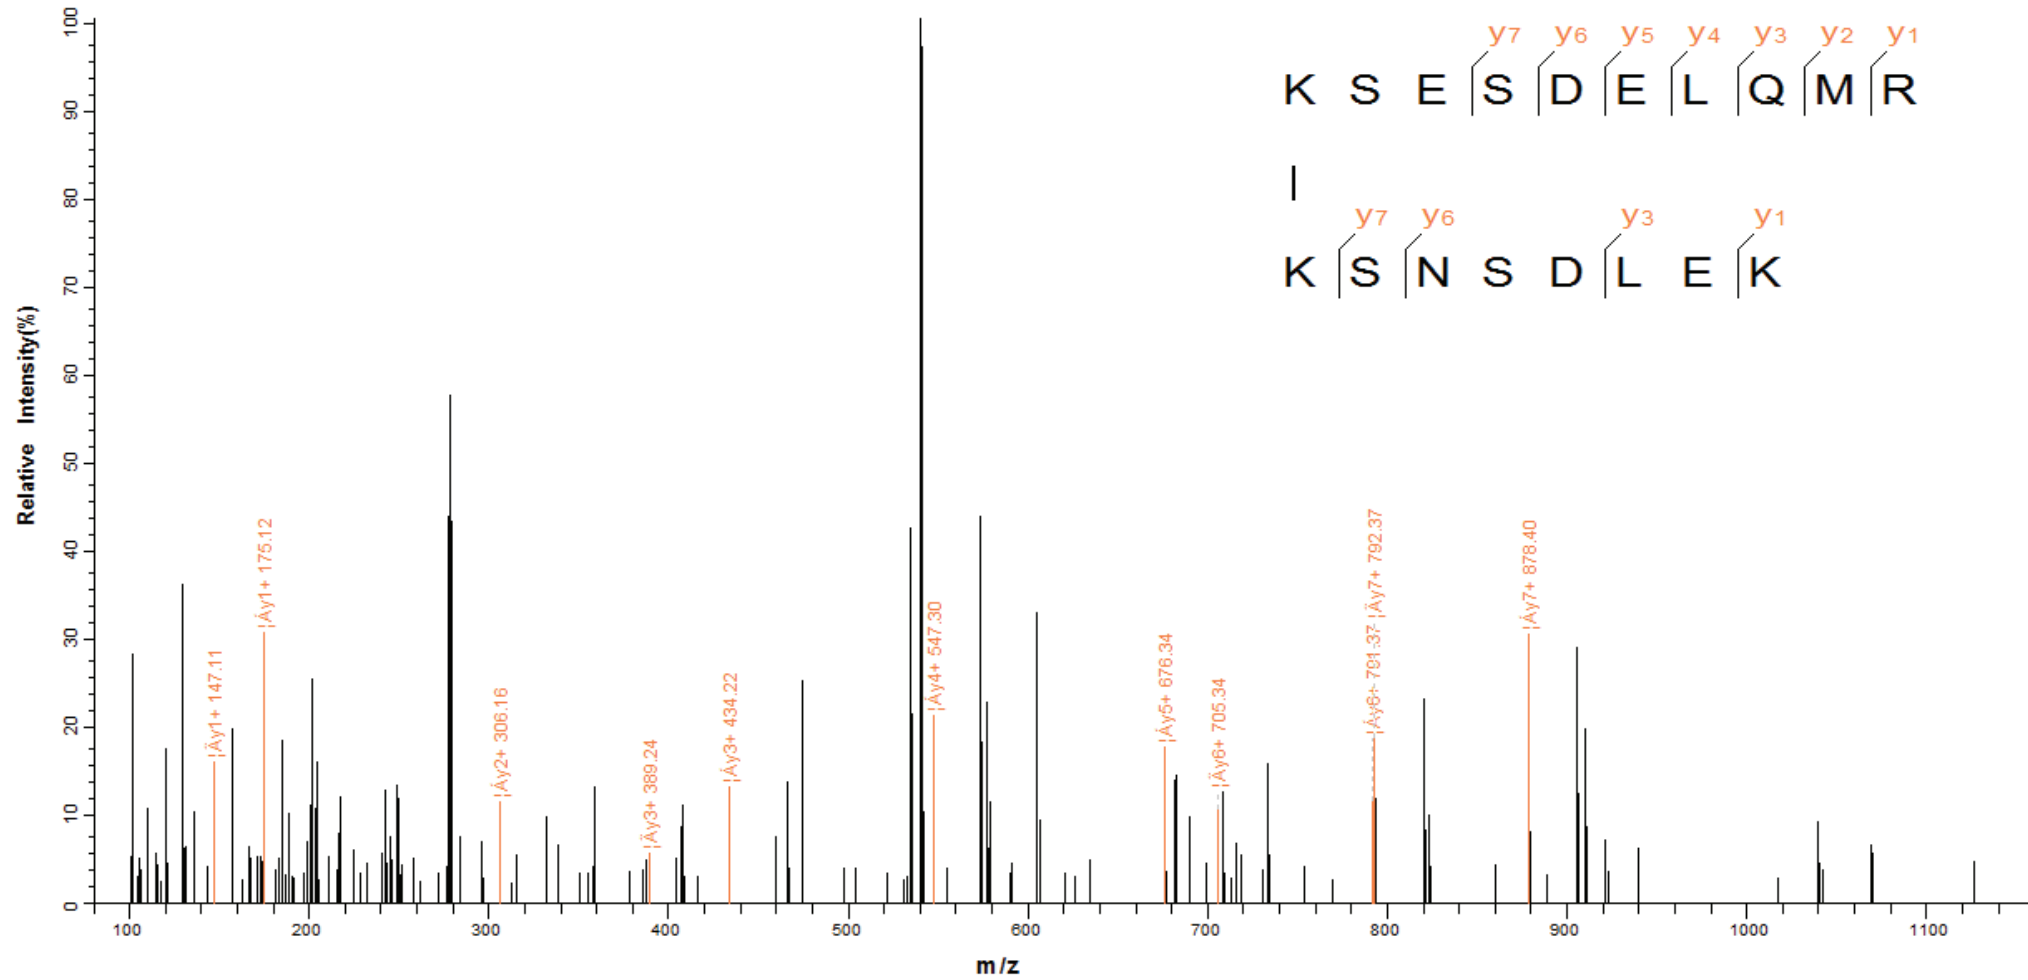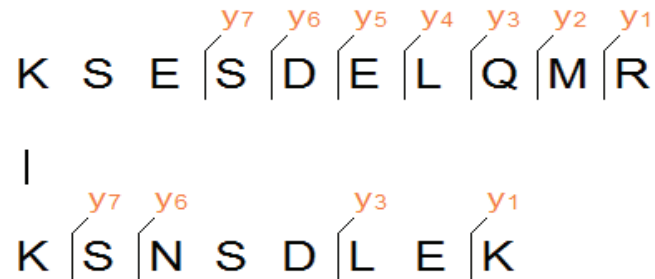

Seq: KTSQMDLAR-ENELPTKR

2.0e+004

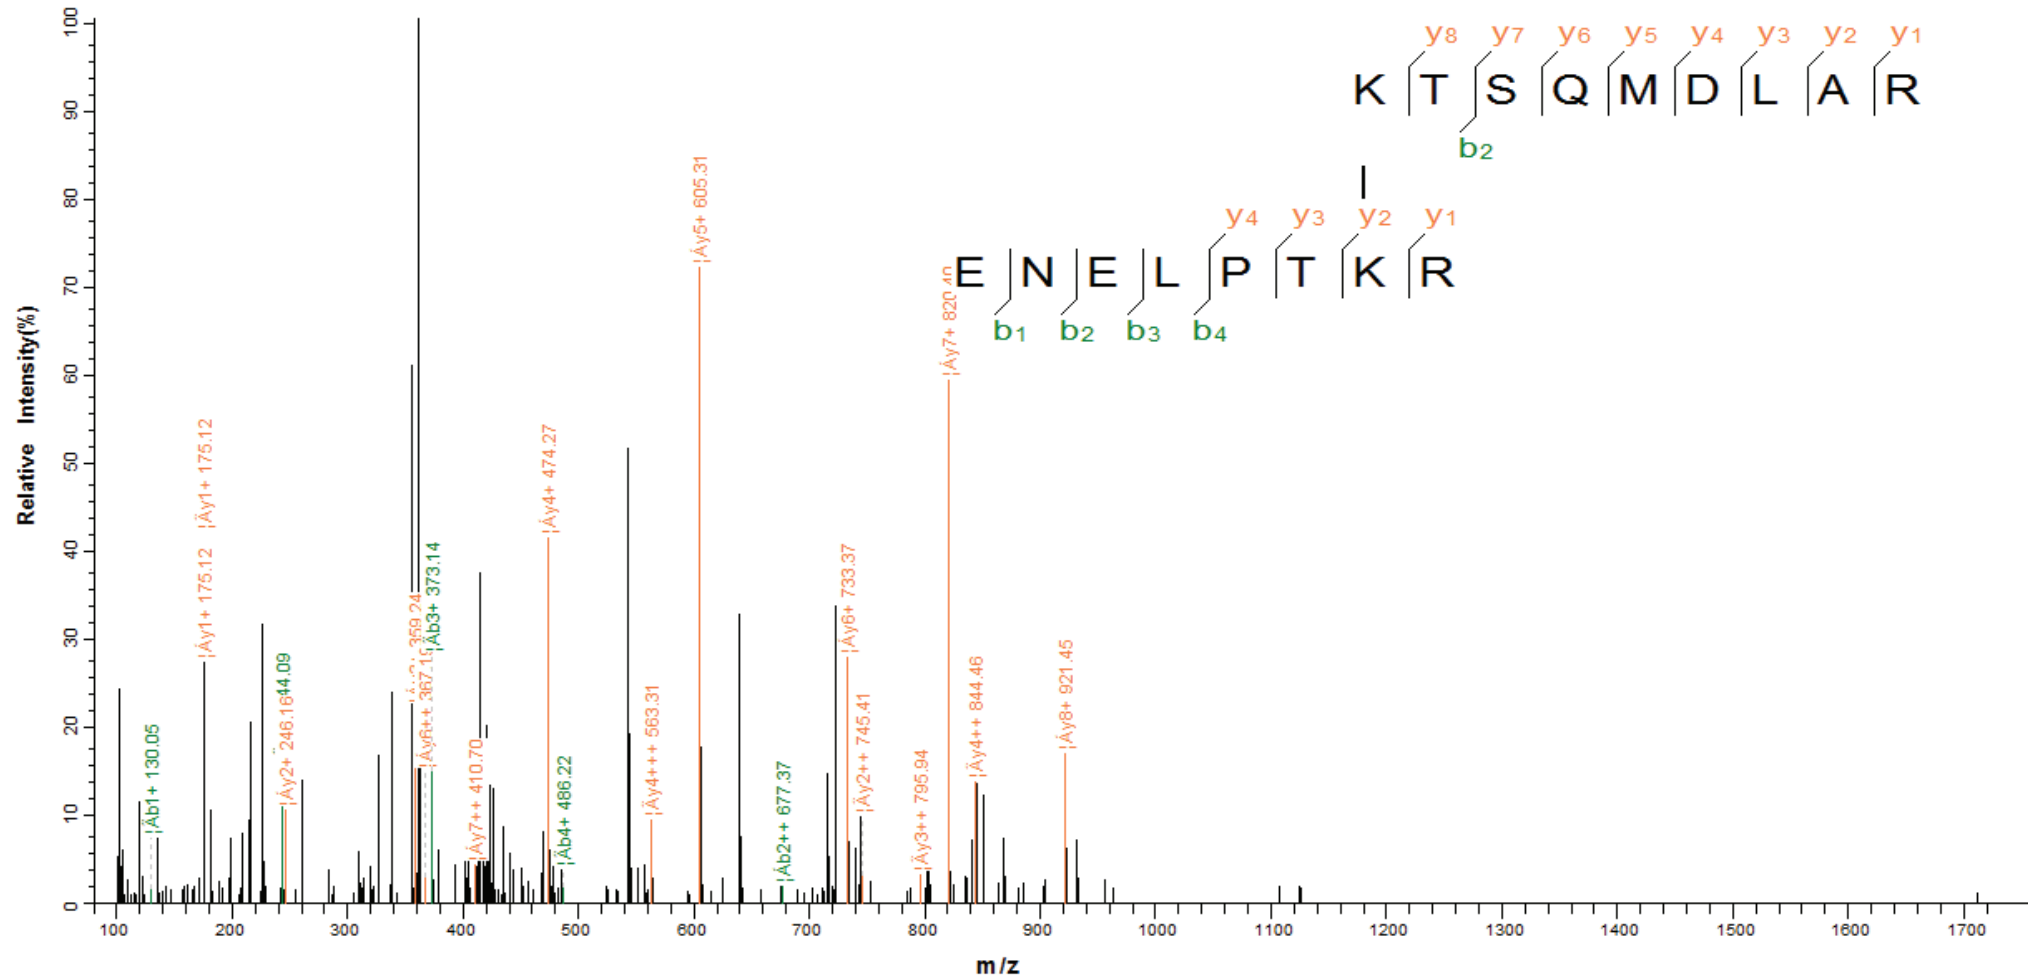

Seq: KTSQMDLAR-KSNSDLEK

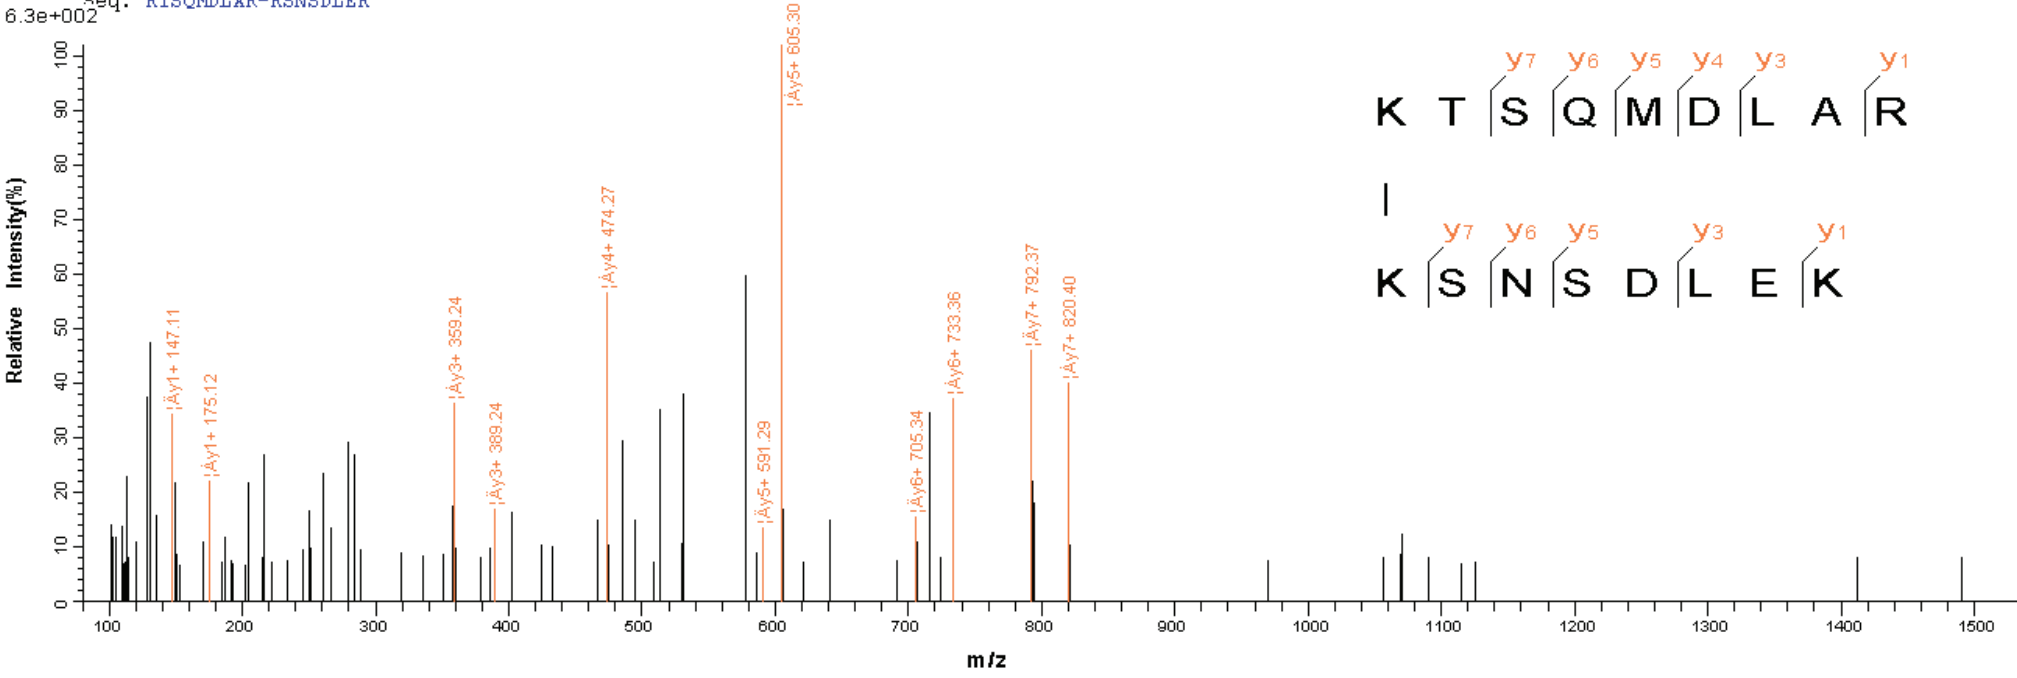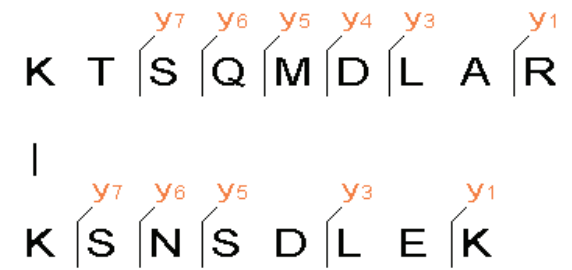

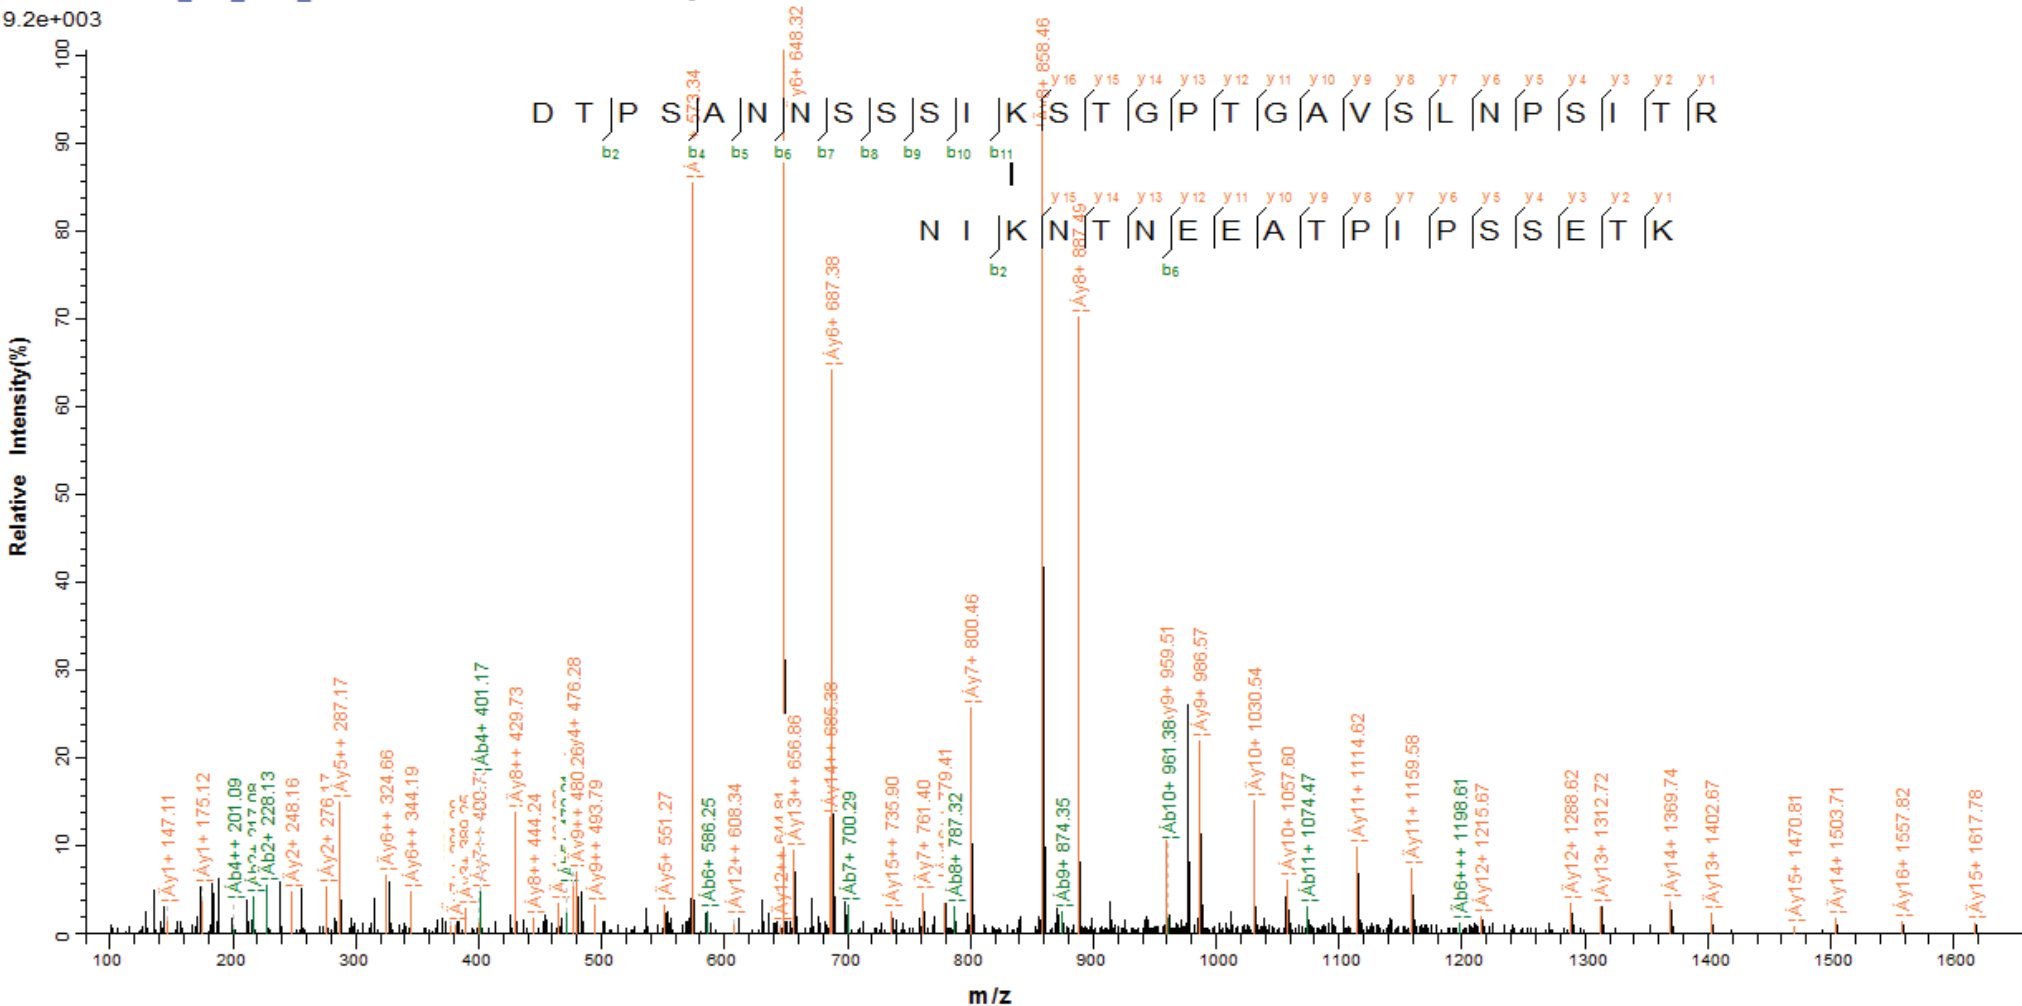



Seq: DTPSANSSSIKSTGPTGAVSLNPSITR-MKNSK

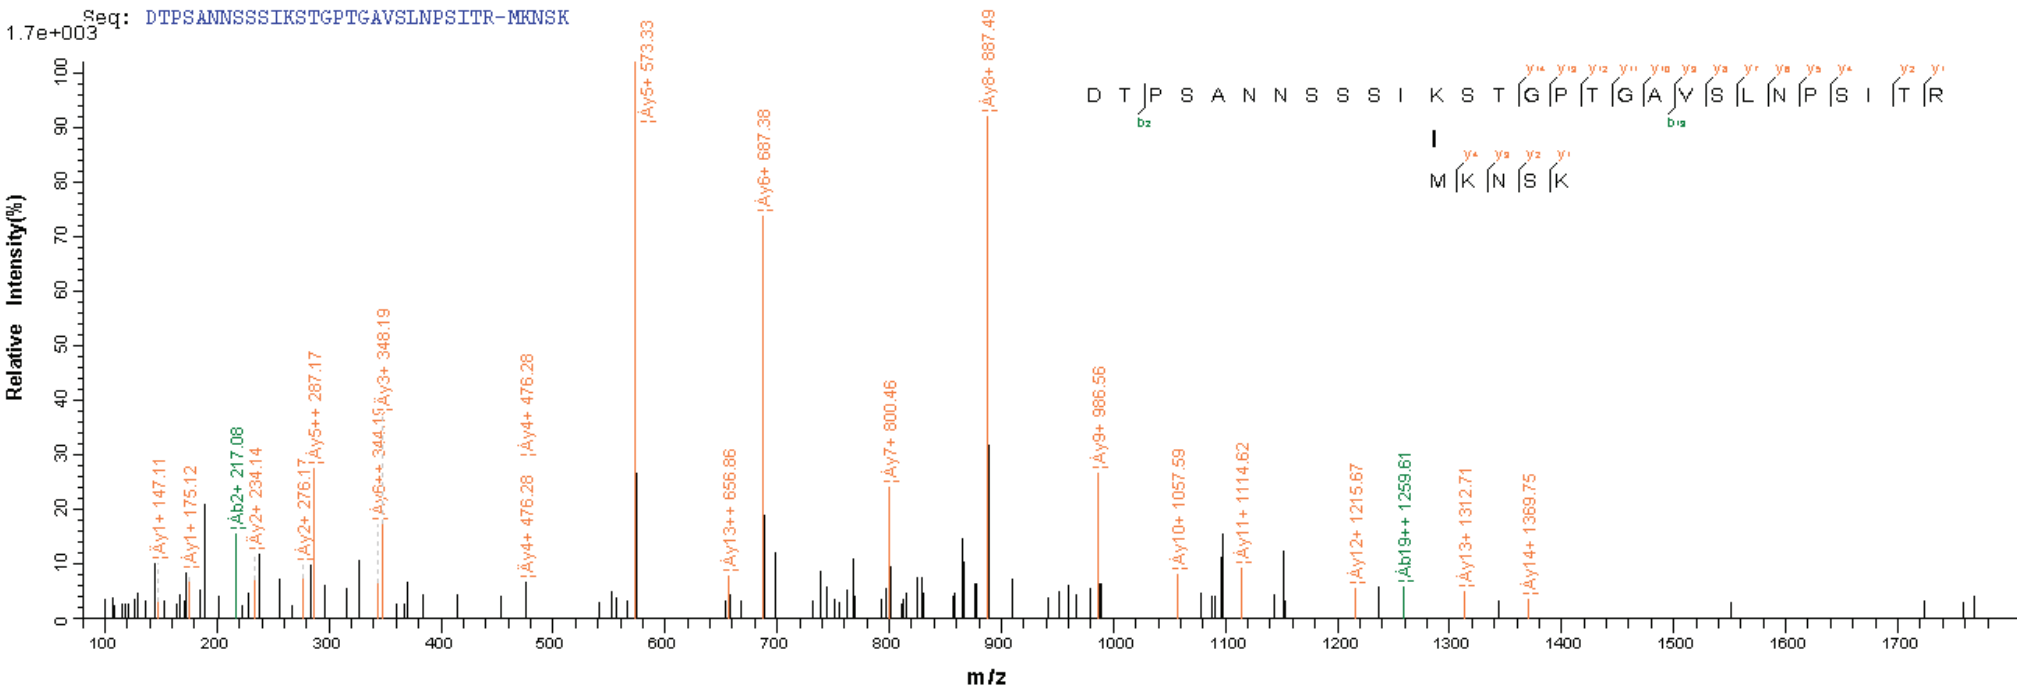

Seq: NVMESIGSDILTAEKMR-HAQKR  
 6.9e+003

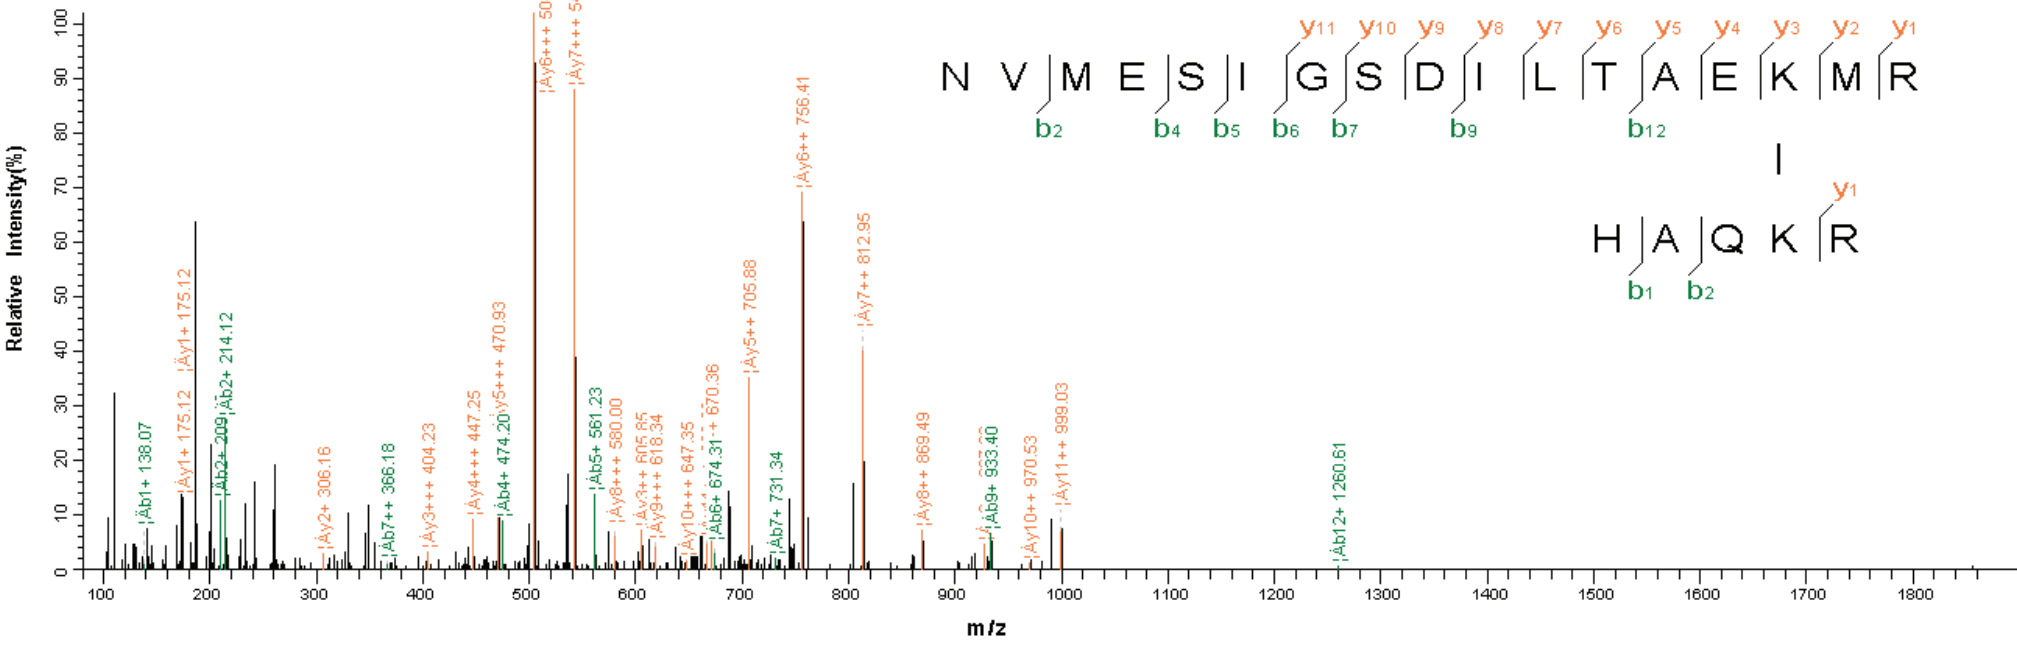

seq: QFKELLTVKKEE-DIAKR

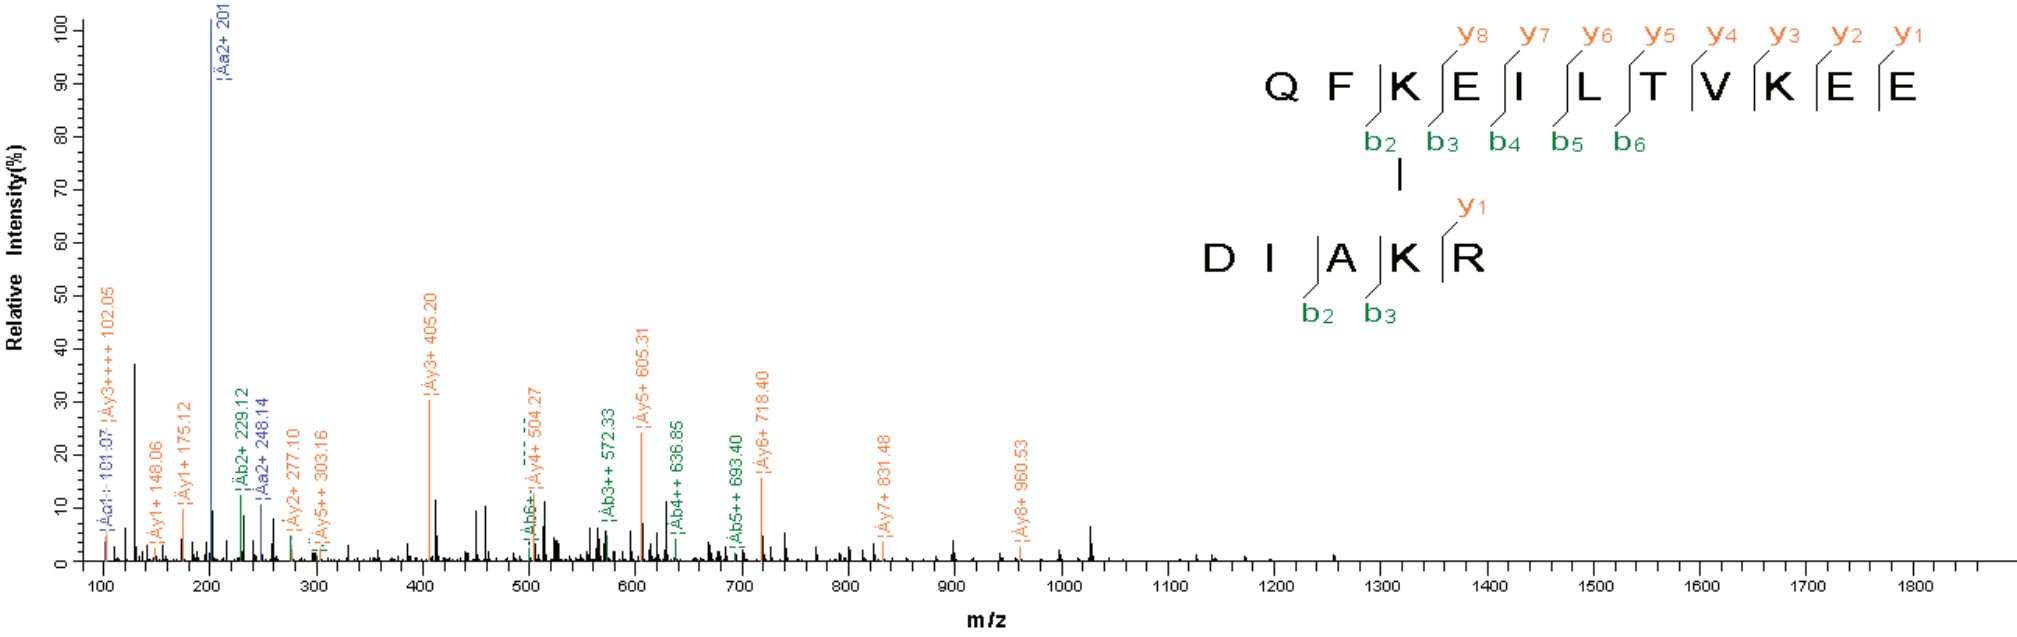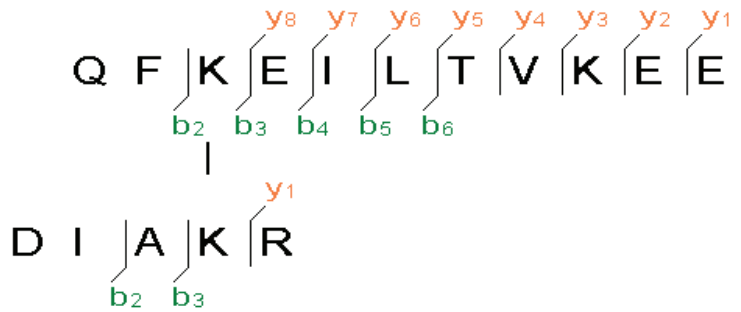

Seq: KNRPTLQVGLDYAR-KSEDELQMR

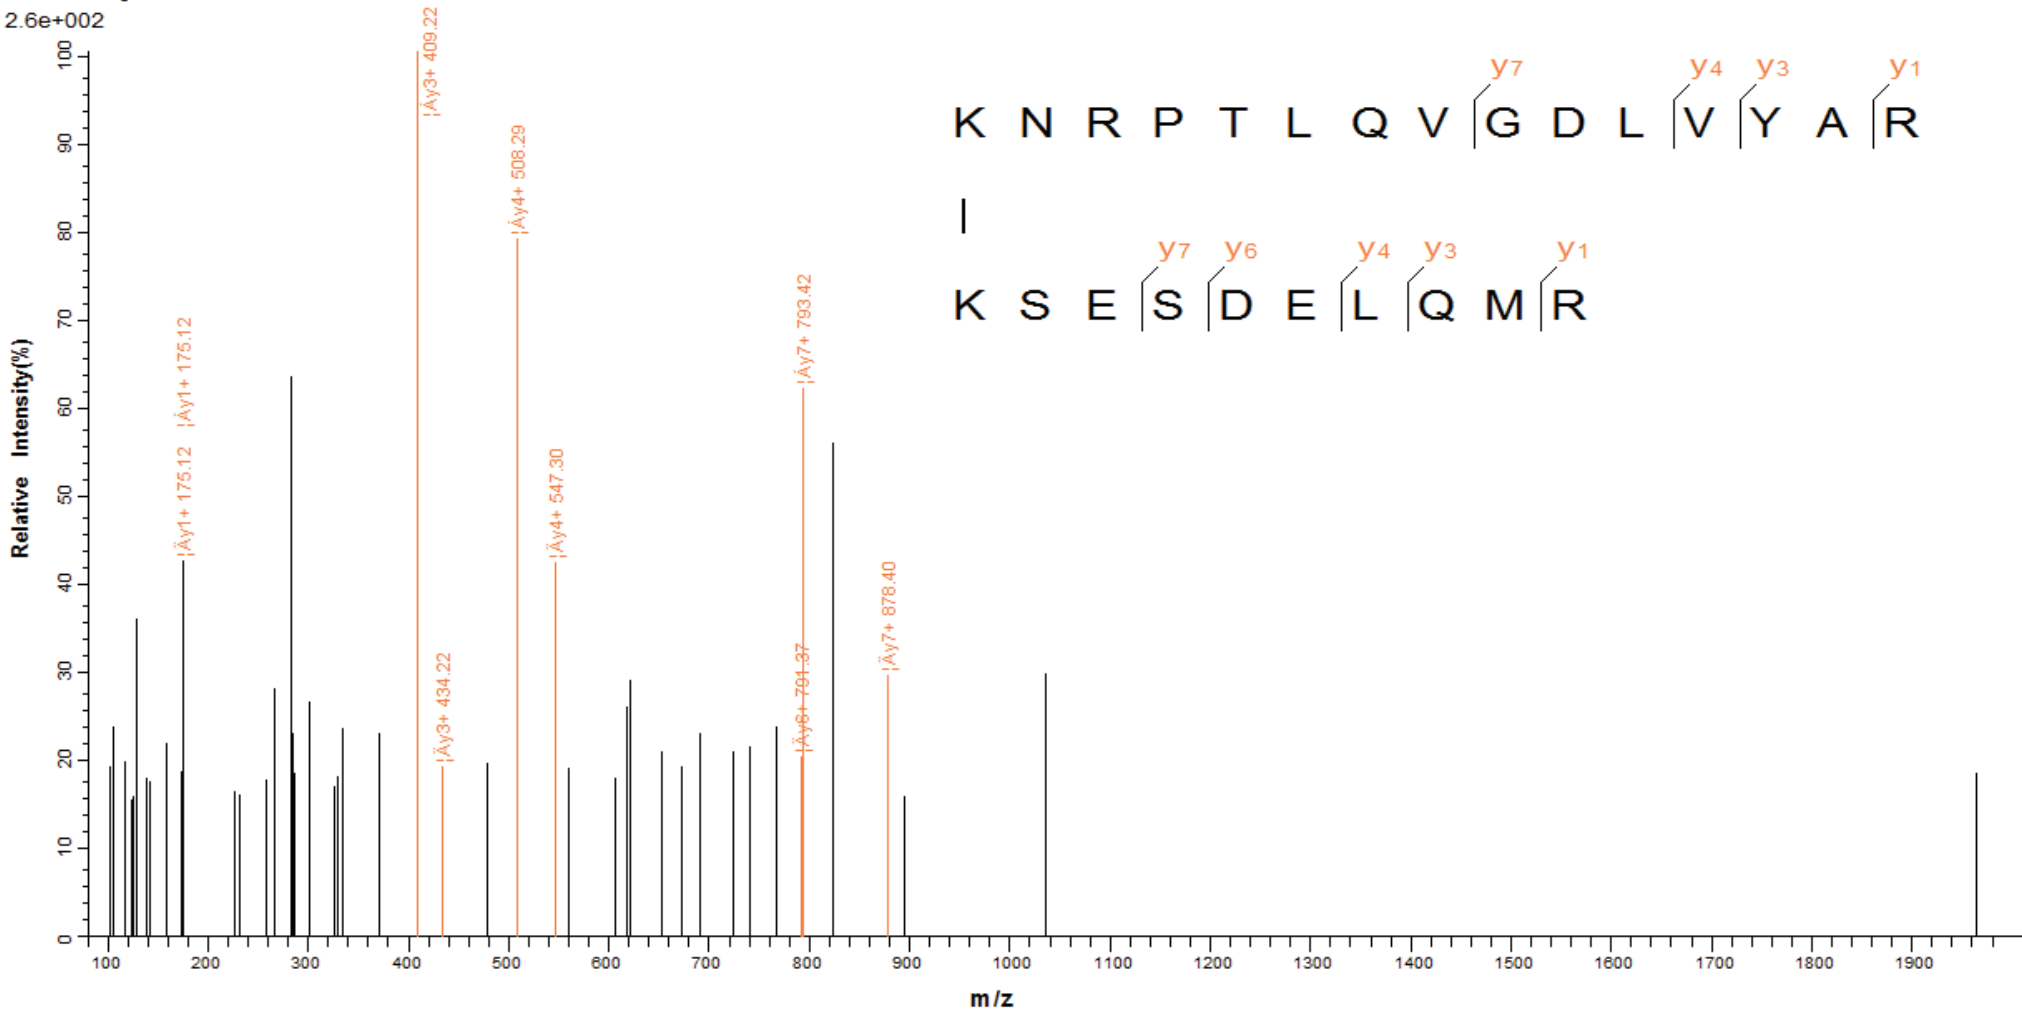

Seq: QLLFNDFPLLKVLAAHTK-KTFGDNSSDDSGSR

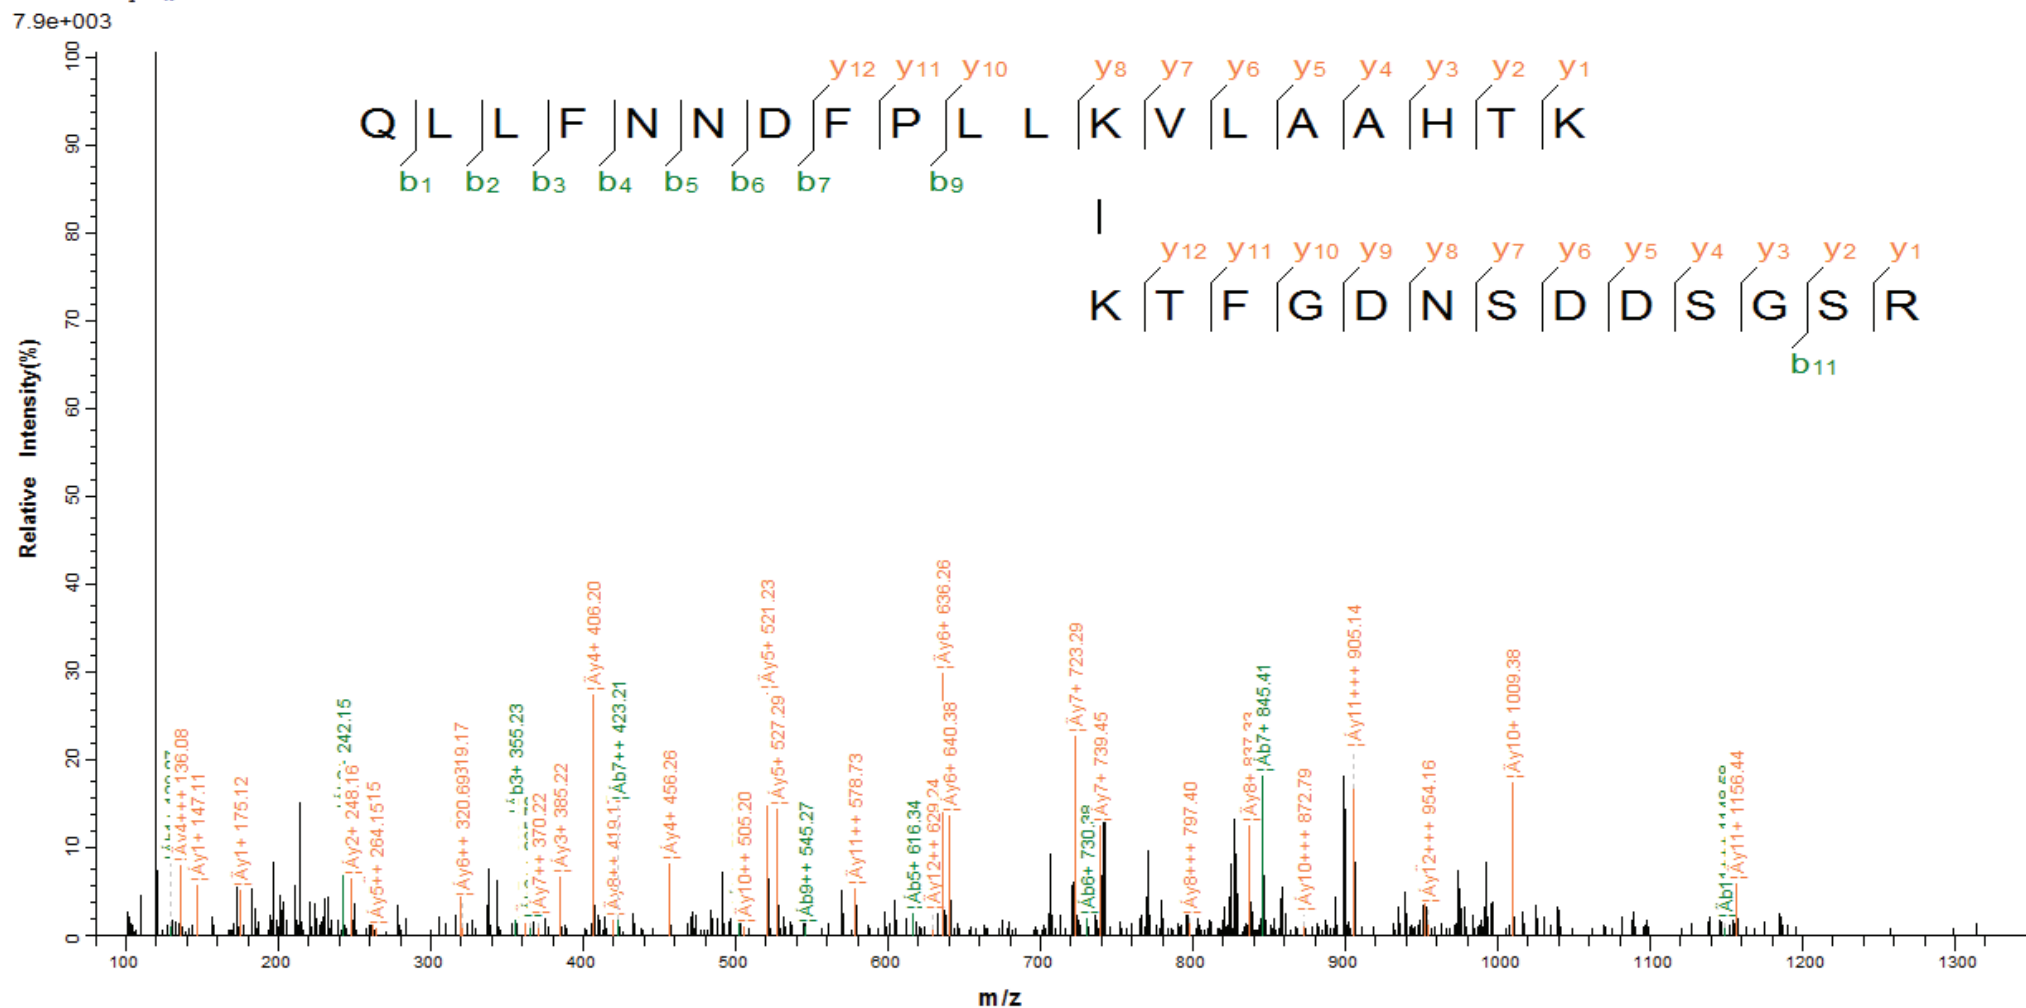

Seq: GKSGVQTAYIDYSSK-KPEGVISGR

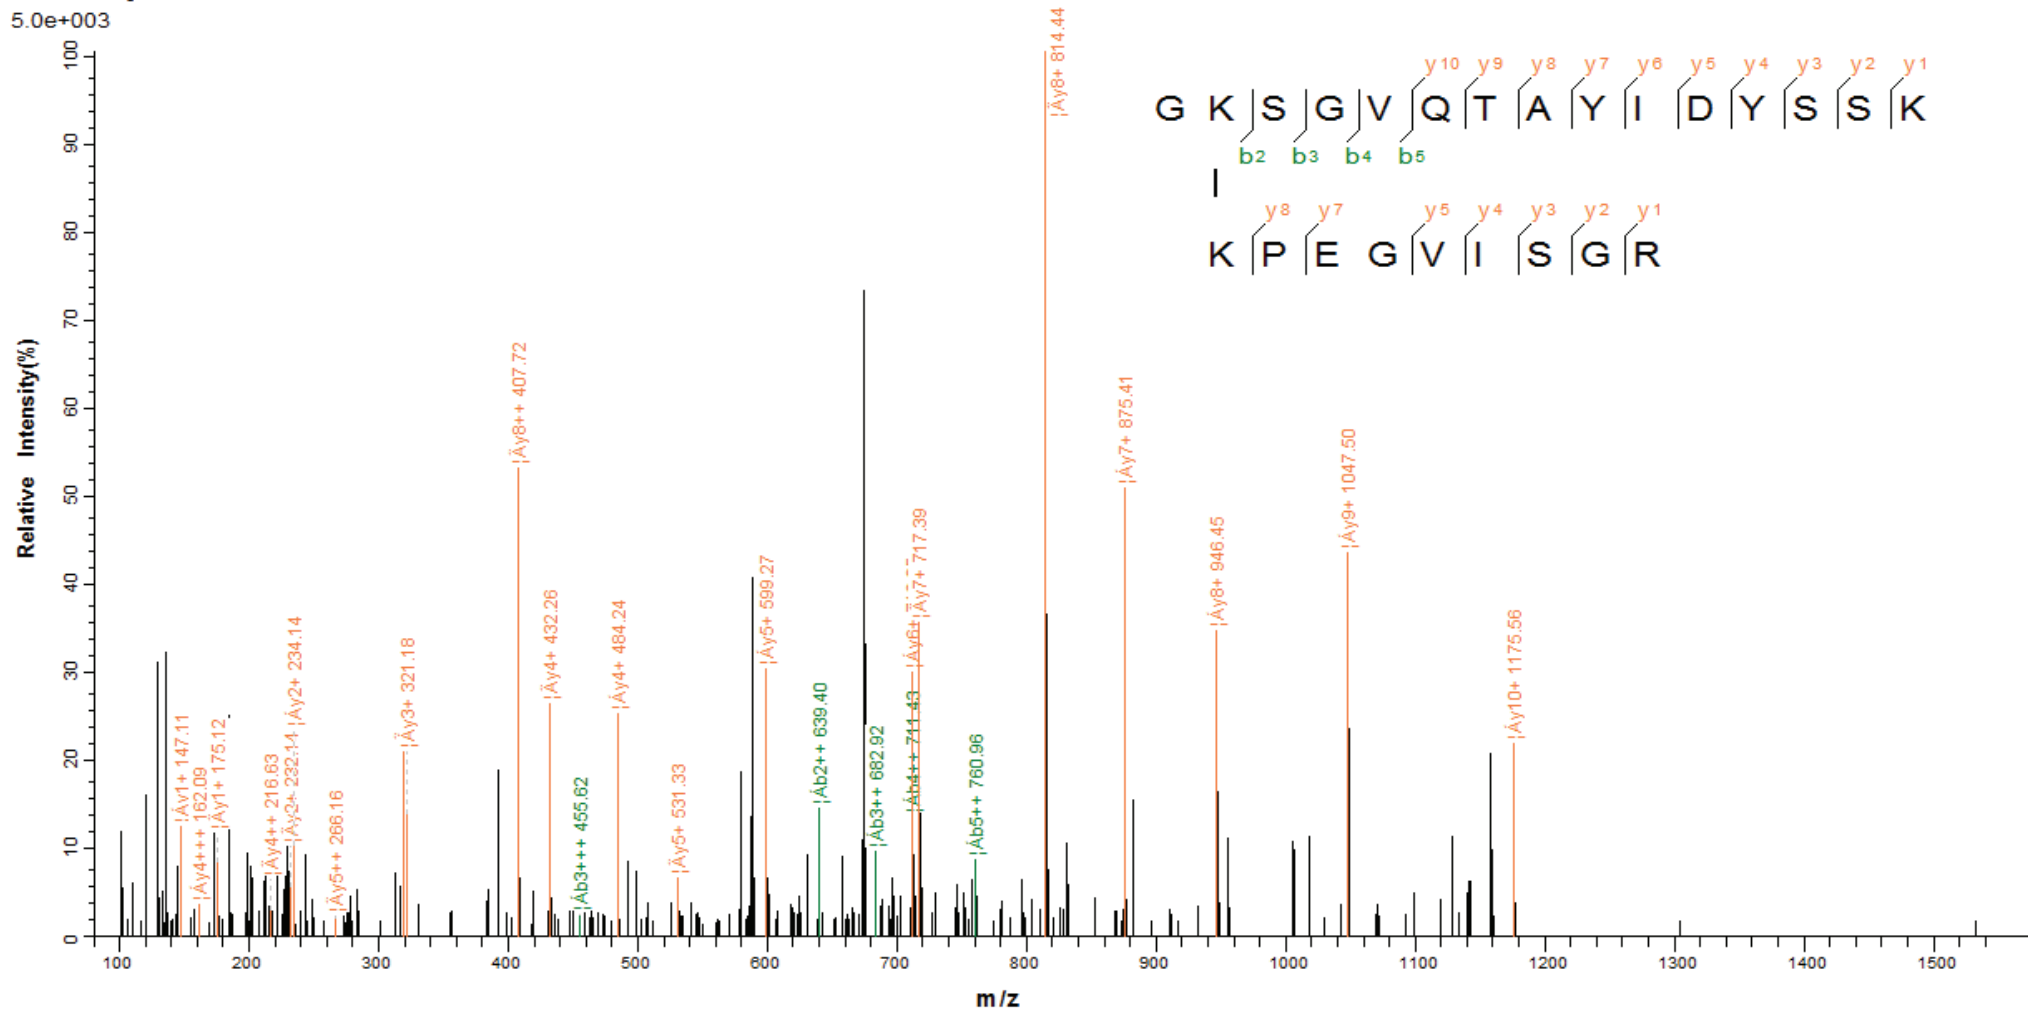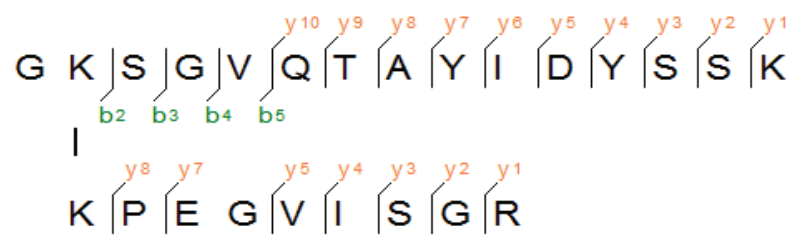

Seq: QLTLVGGGAKITPEMIK  
 4.0e+003

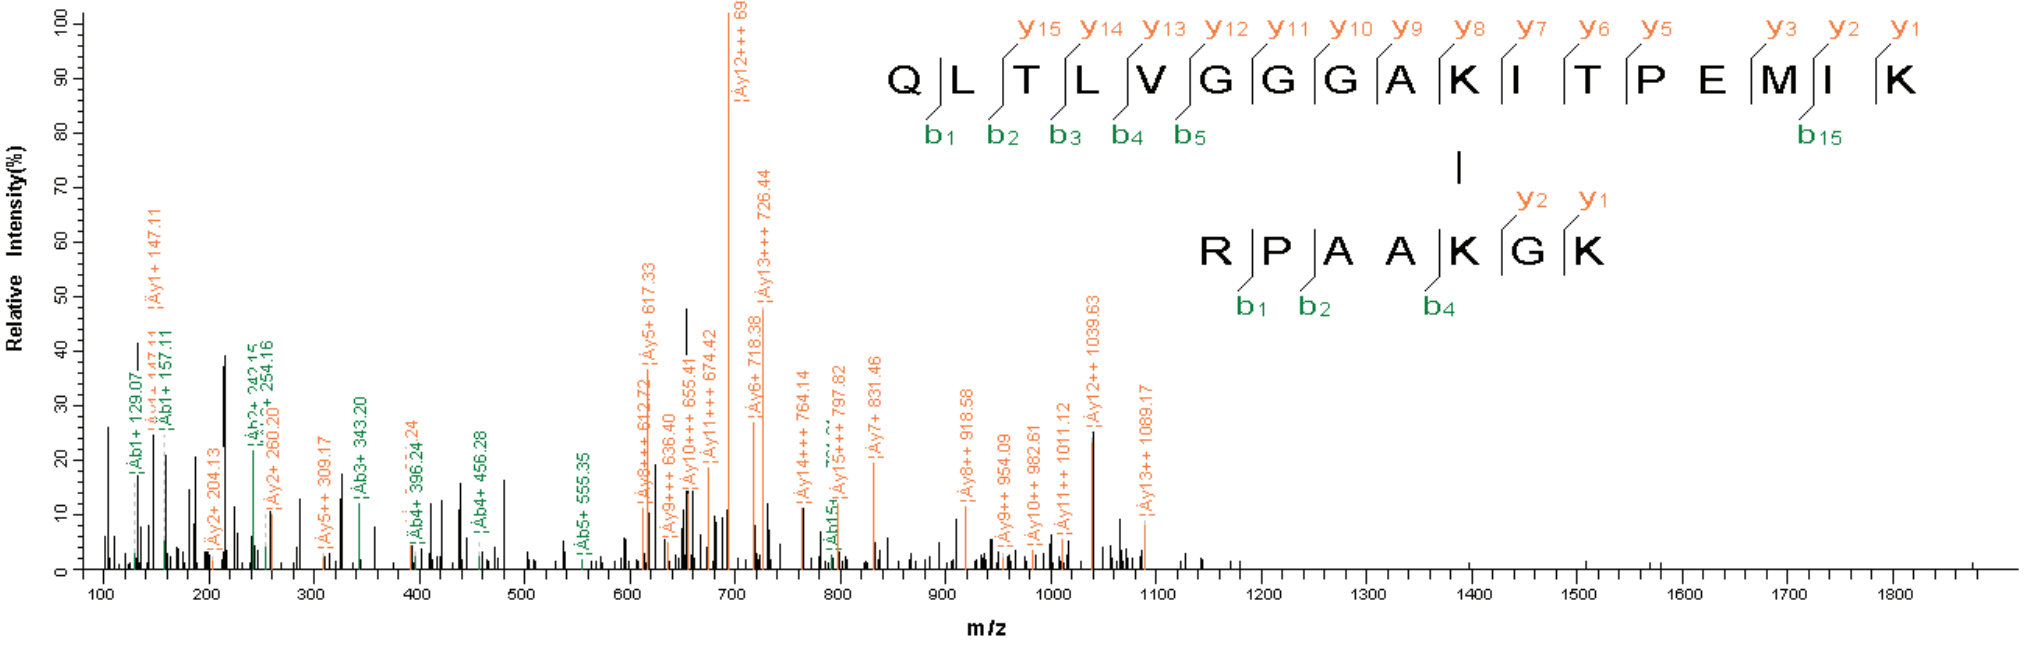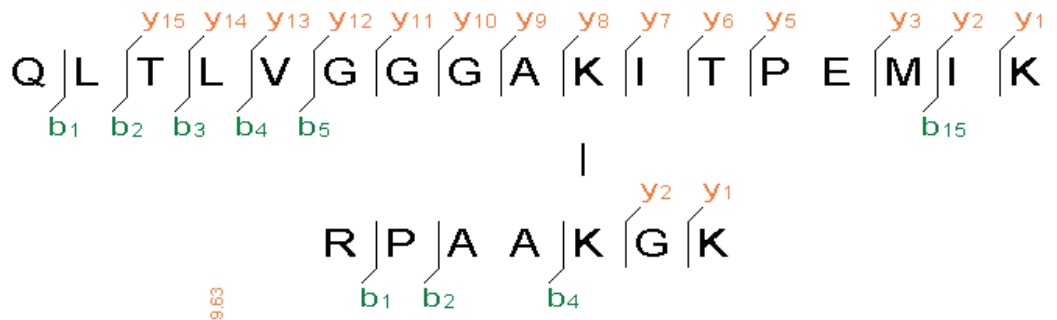

Seq: QLTLVGGGAKITPEMIK

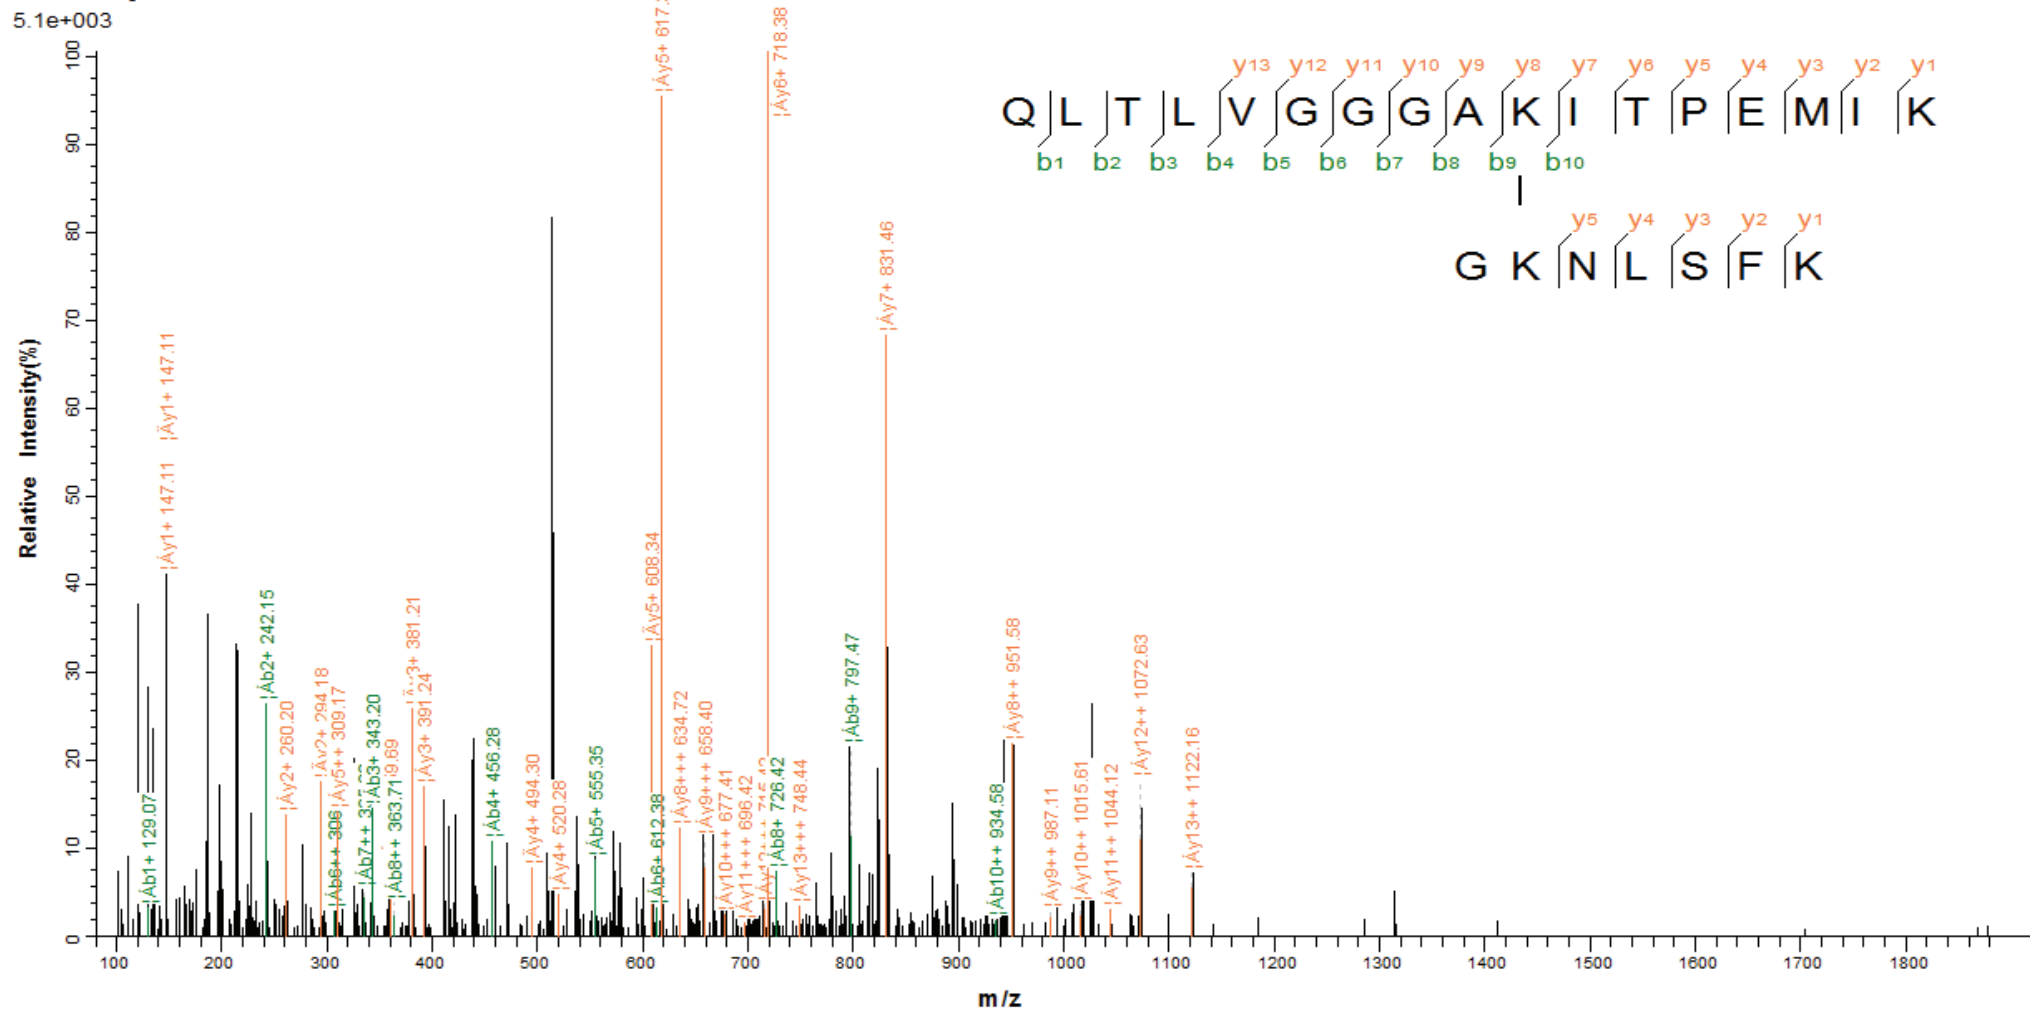



Seq: ITPPEMIKR-GKNLSFK

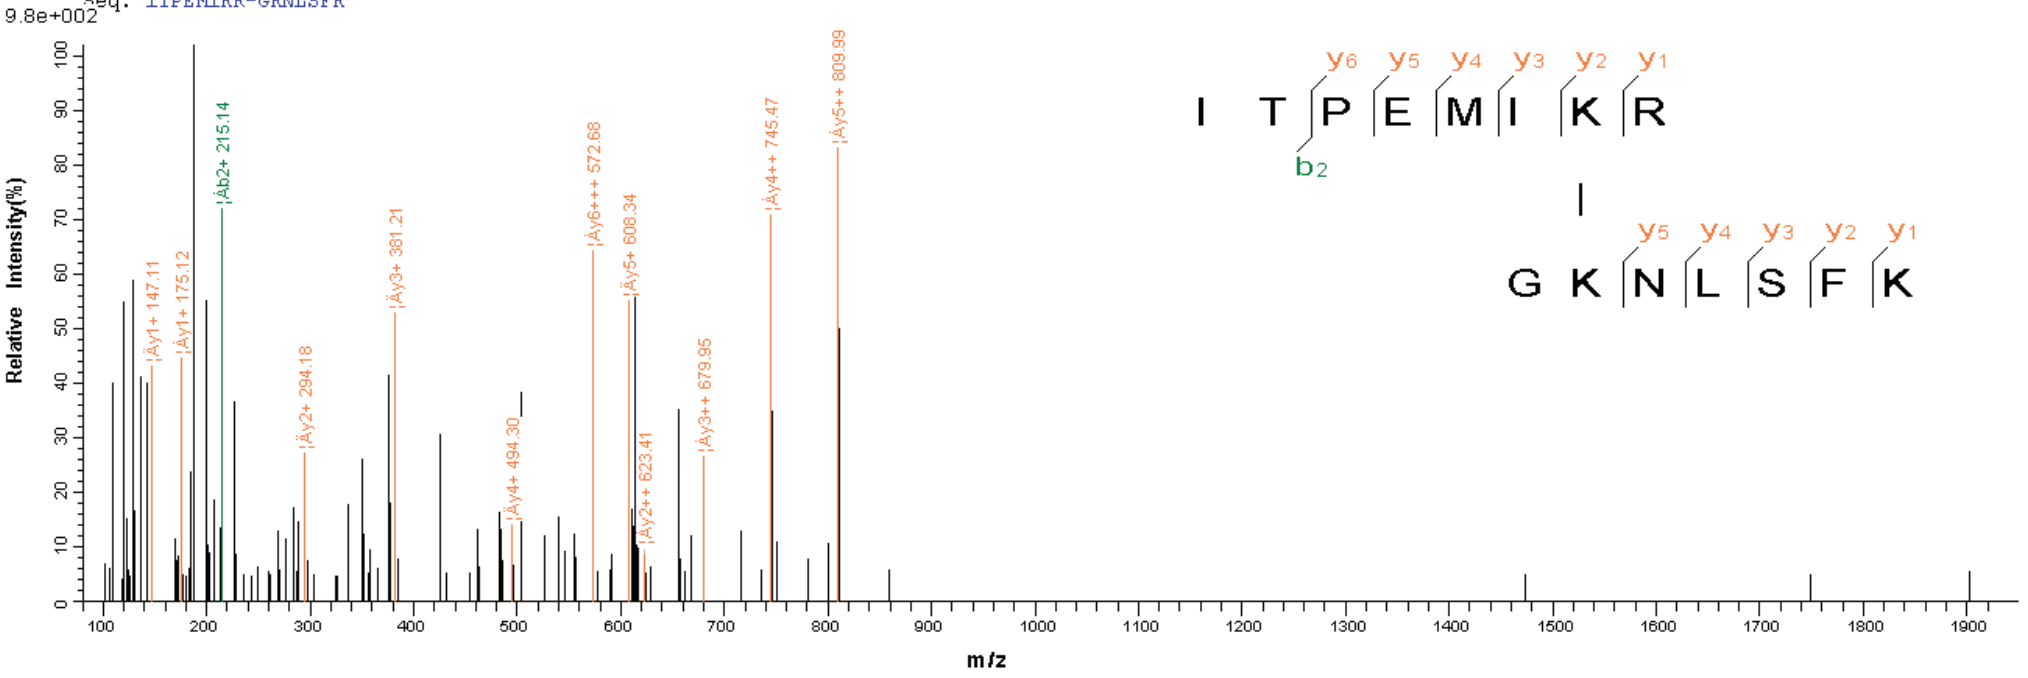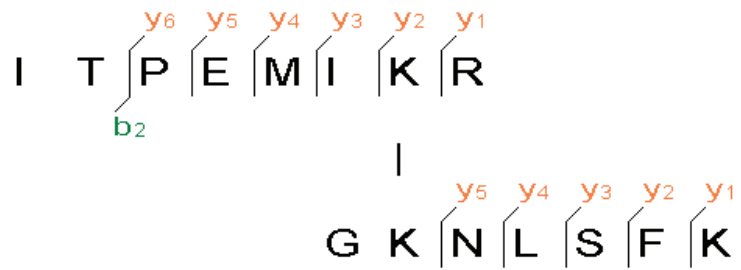

EXOSOME\_A9\_1.003029.003029.4.dta Seq: KYEEFR-VKTEDIR

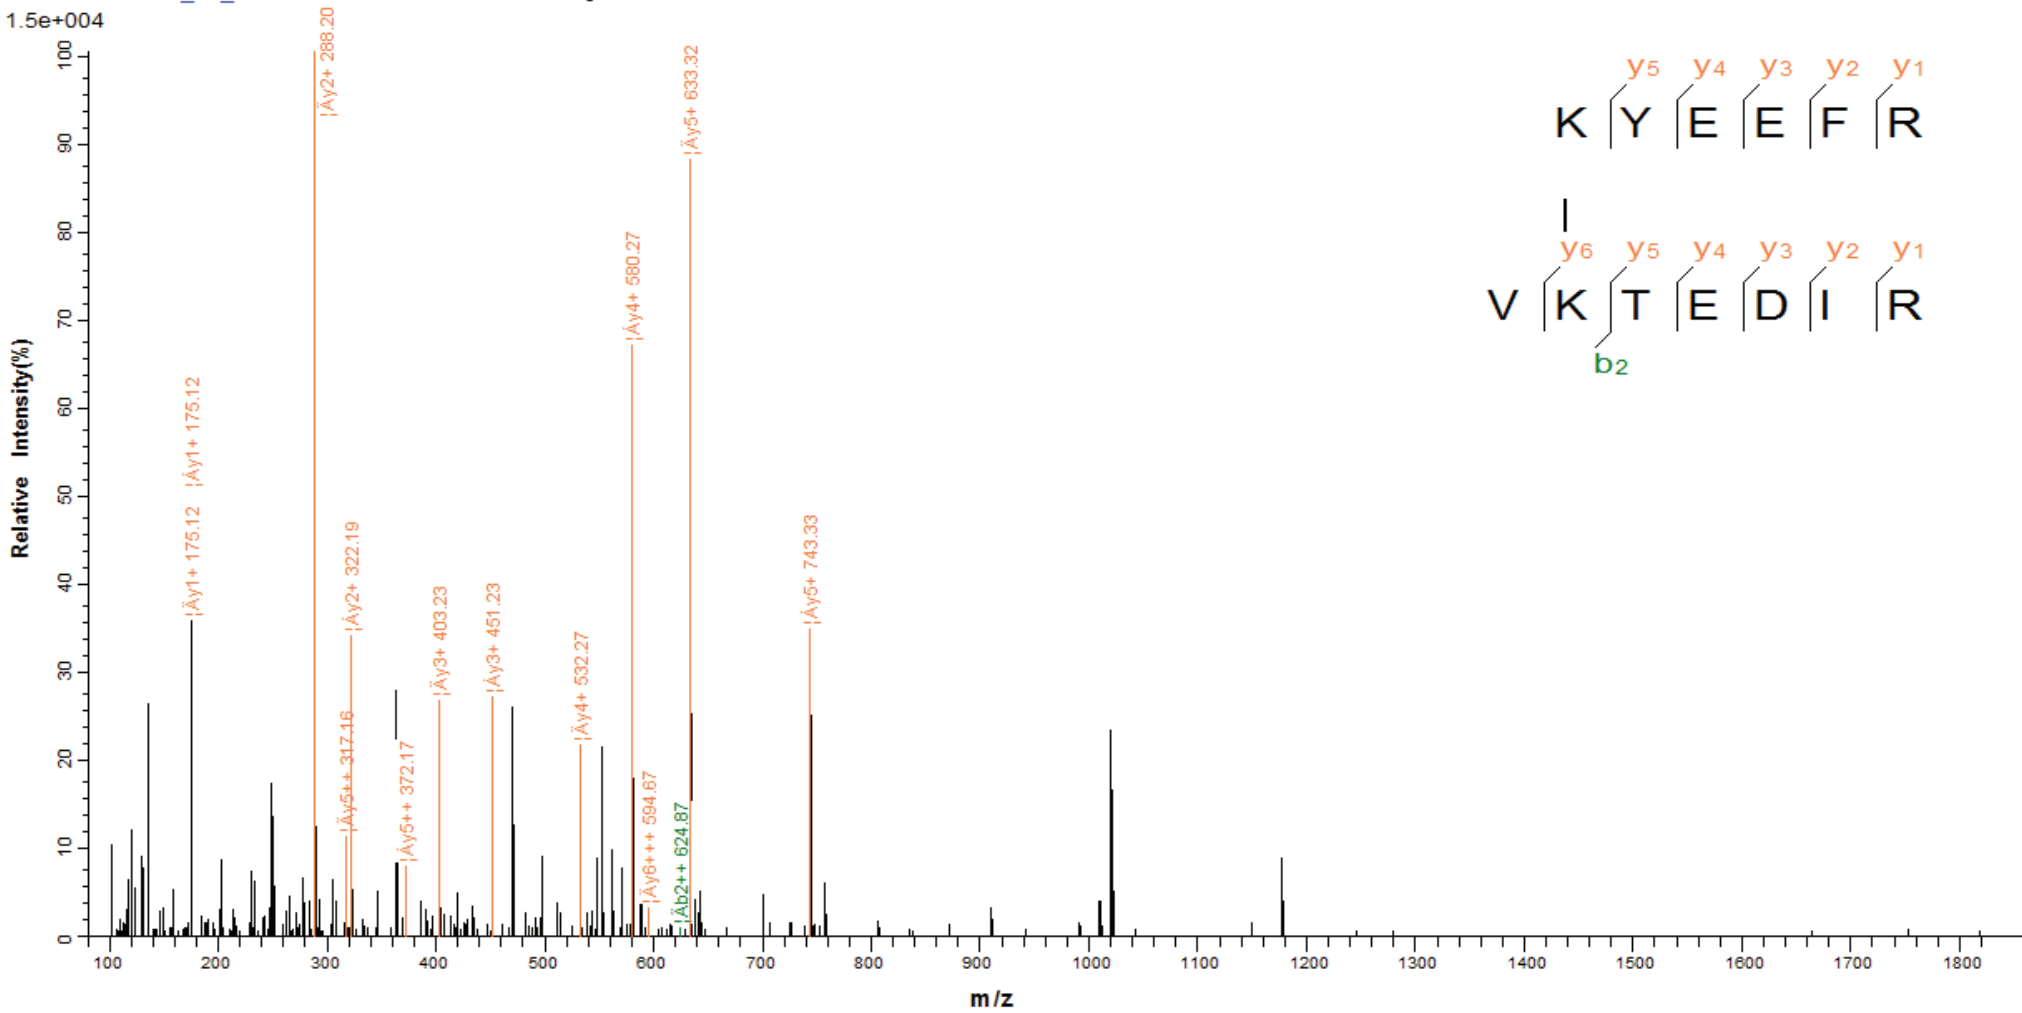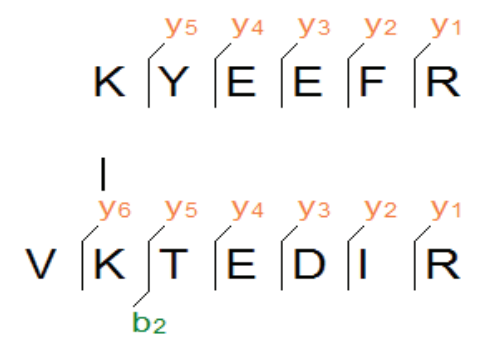

Seq: KYEEFR-KQPAK

2.3e+003

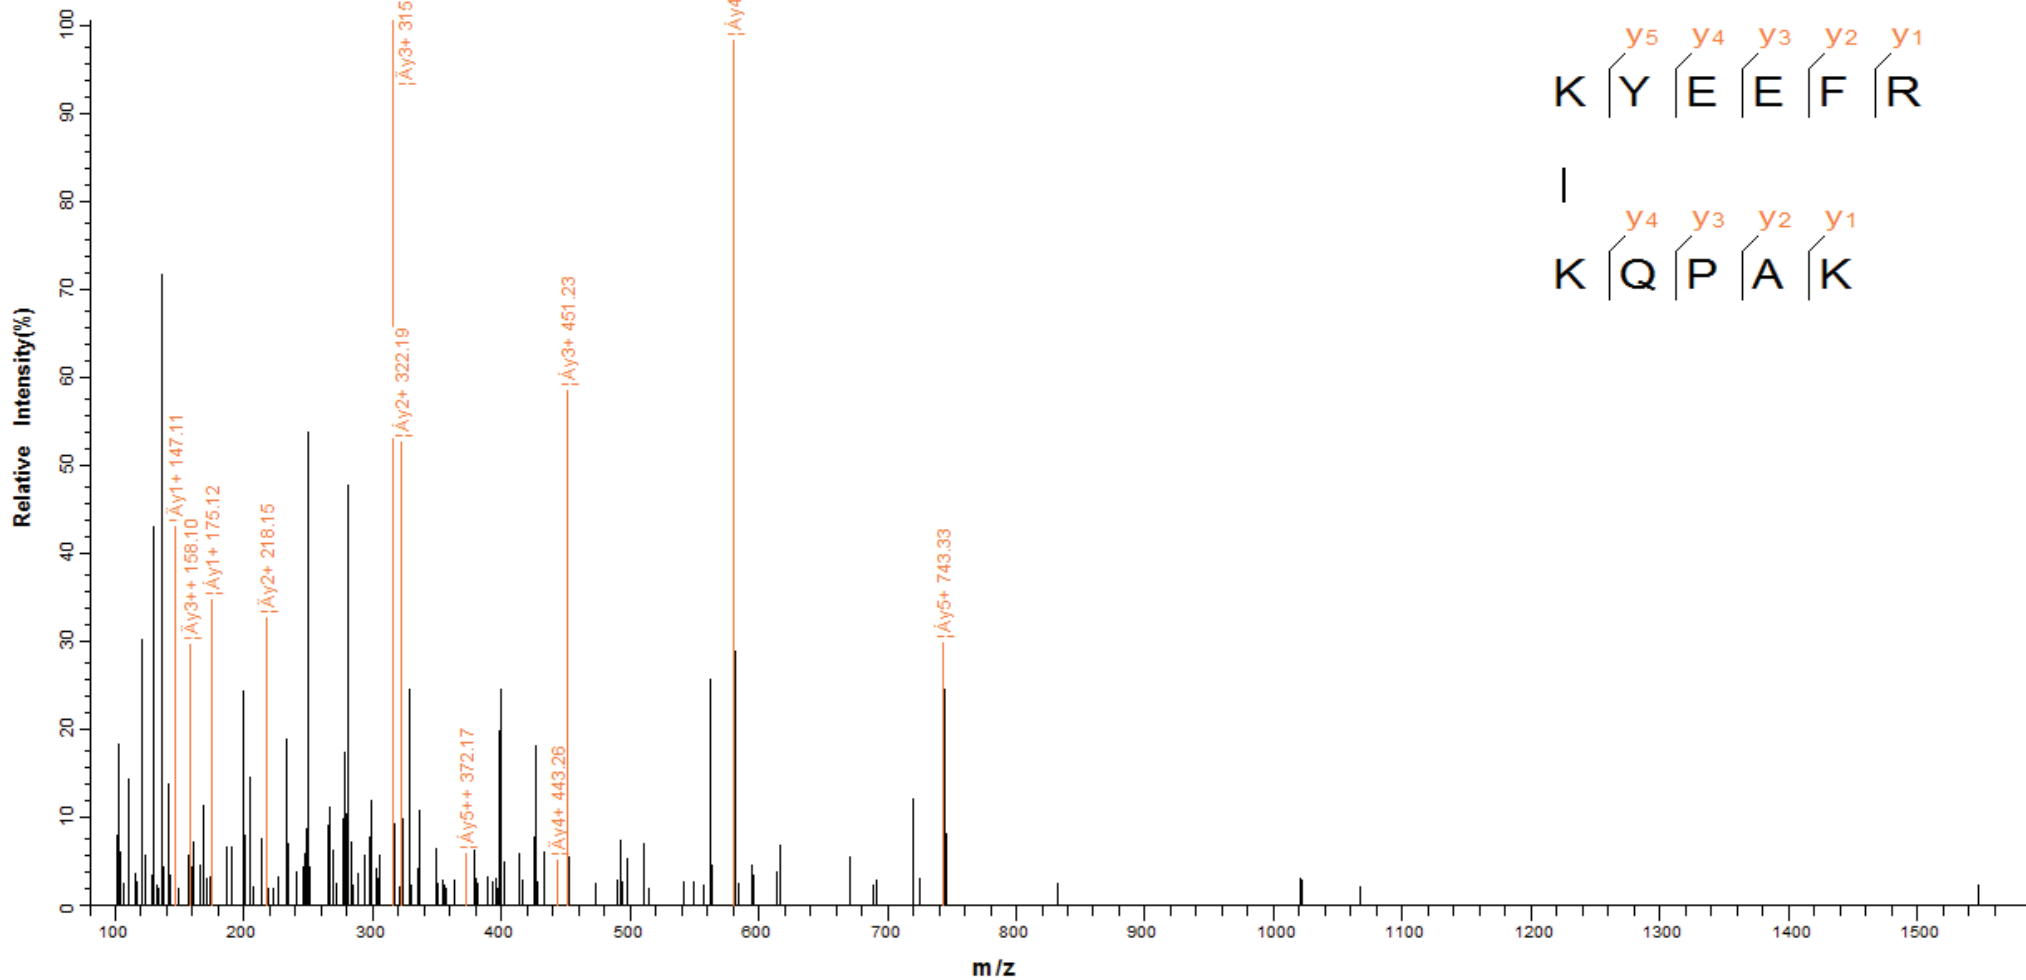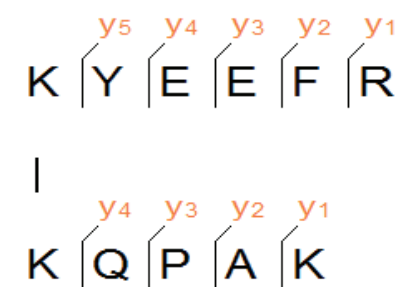

Seq: KYEEFR-EKGVTEK

3.0e+003

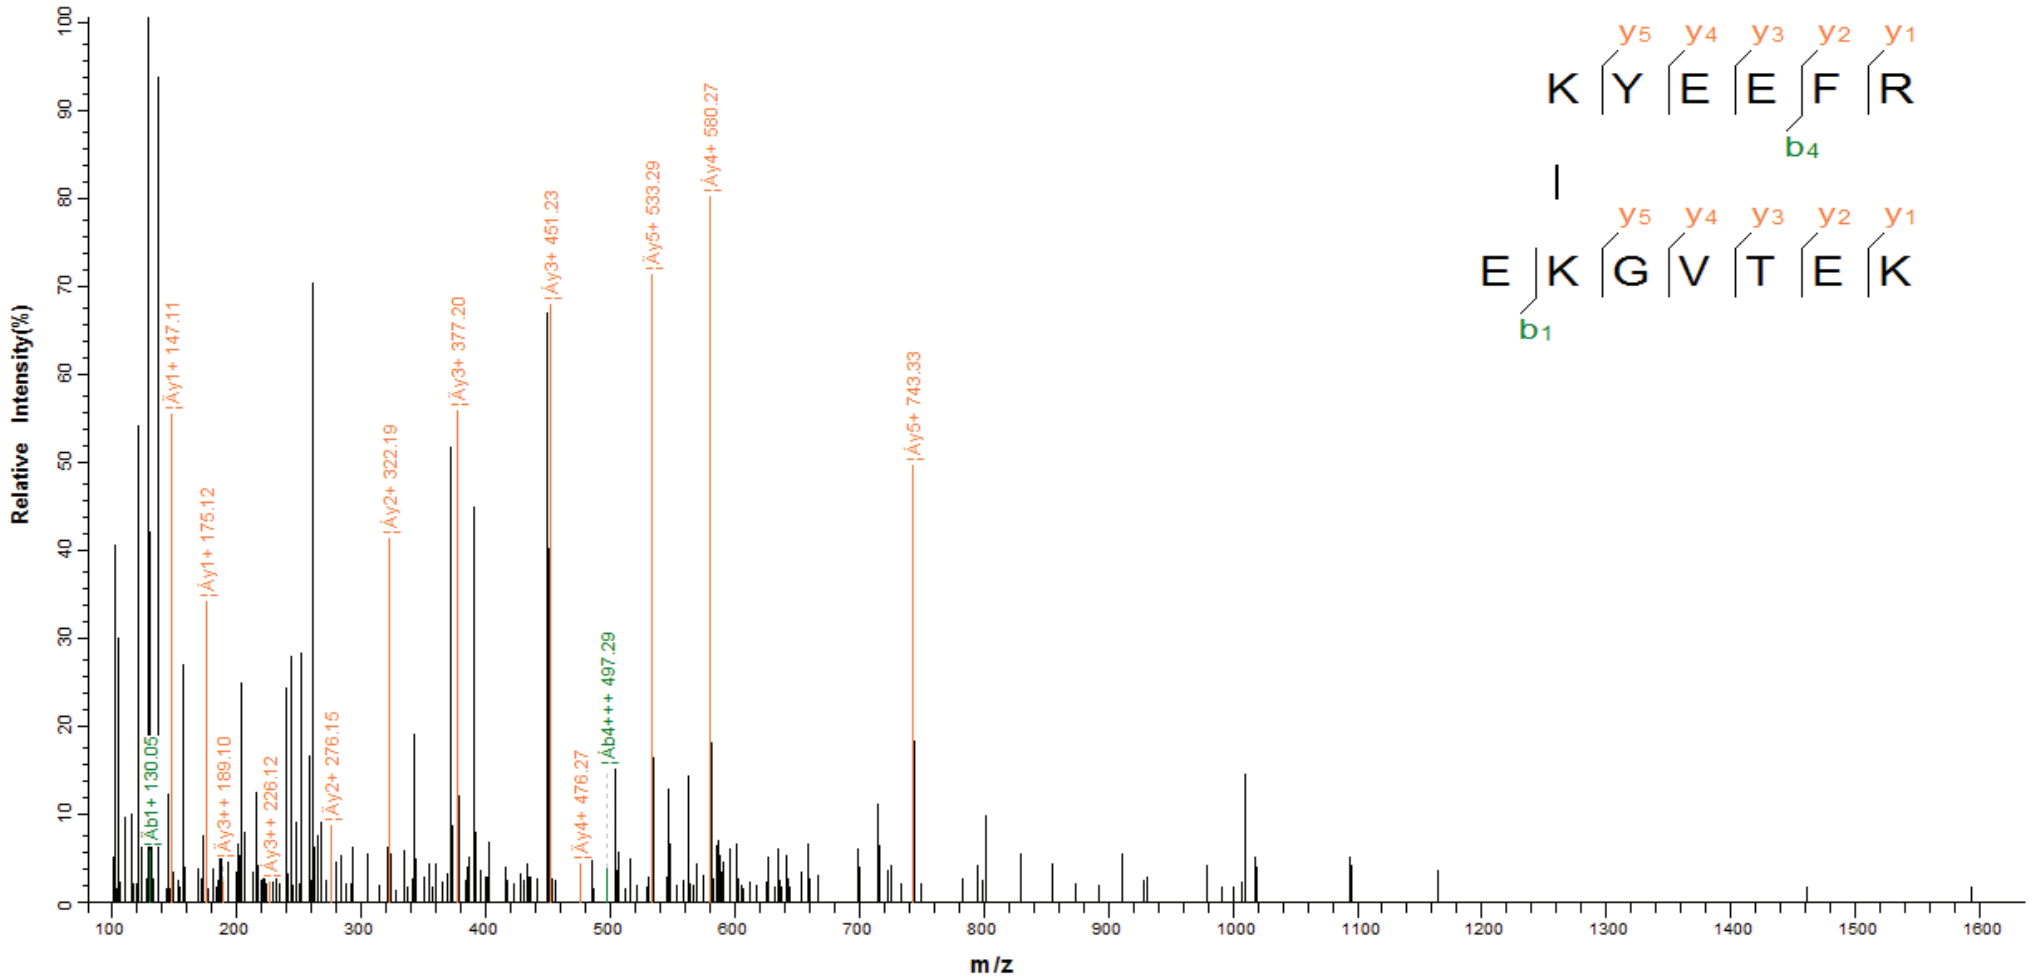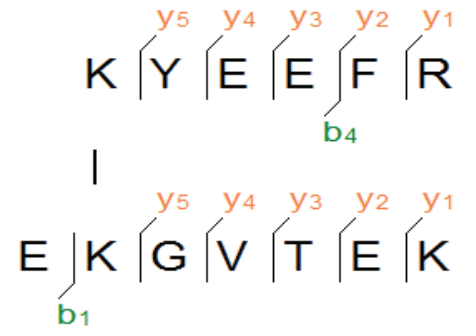

Seq: KYEEFR-GKNLSFK

6.7e+003

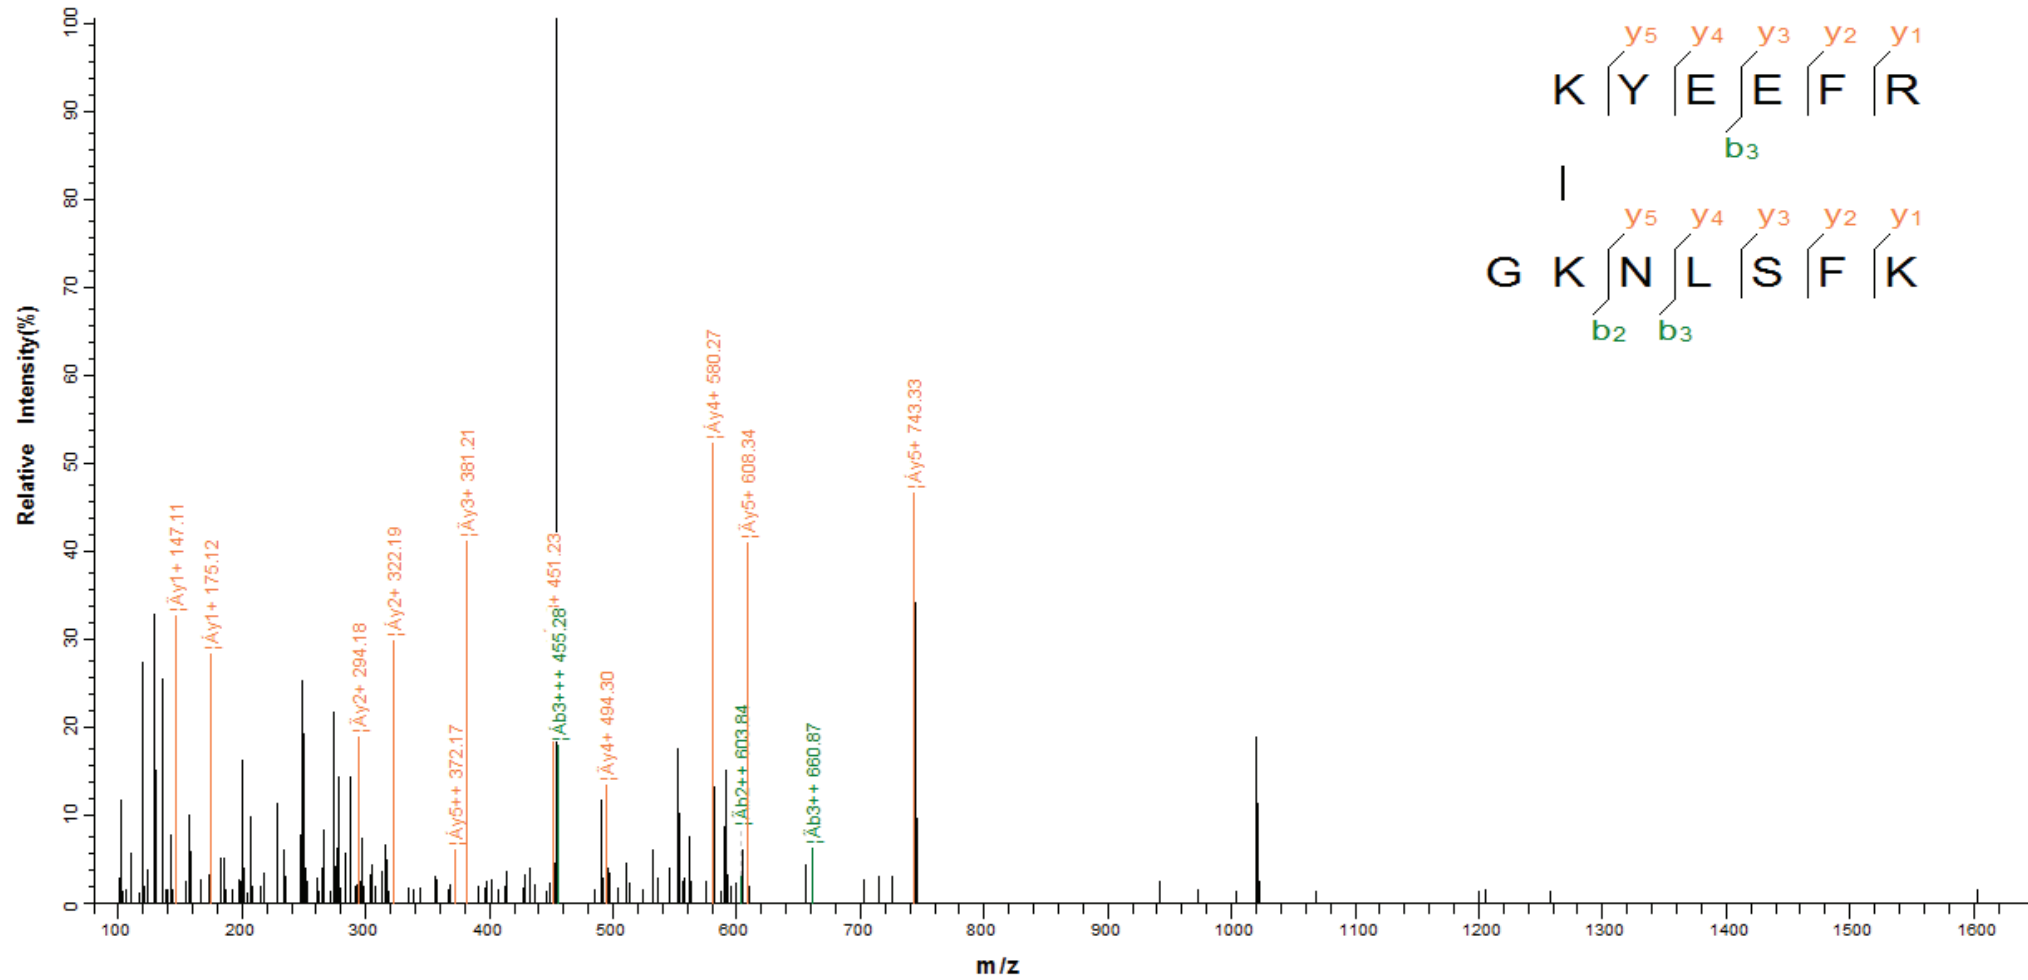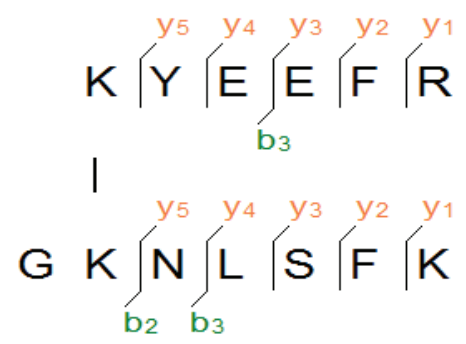

Seq: KYEEFR-NLSFKR

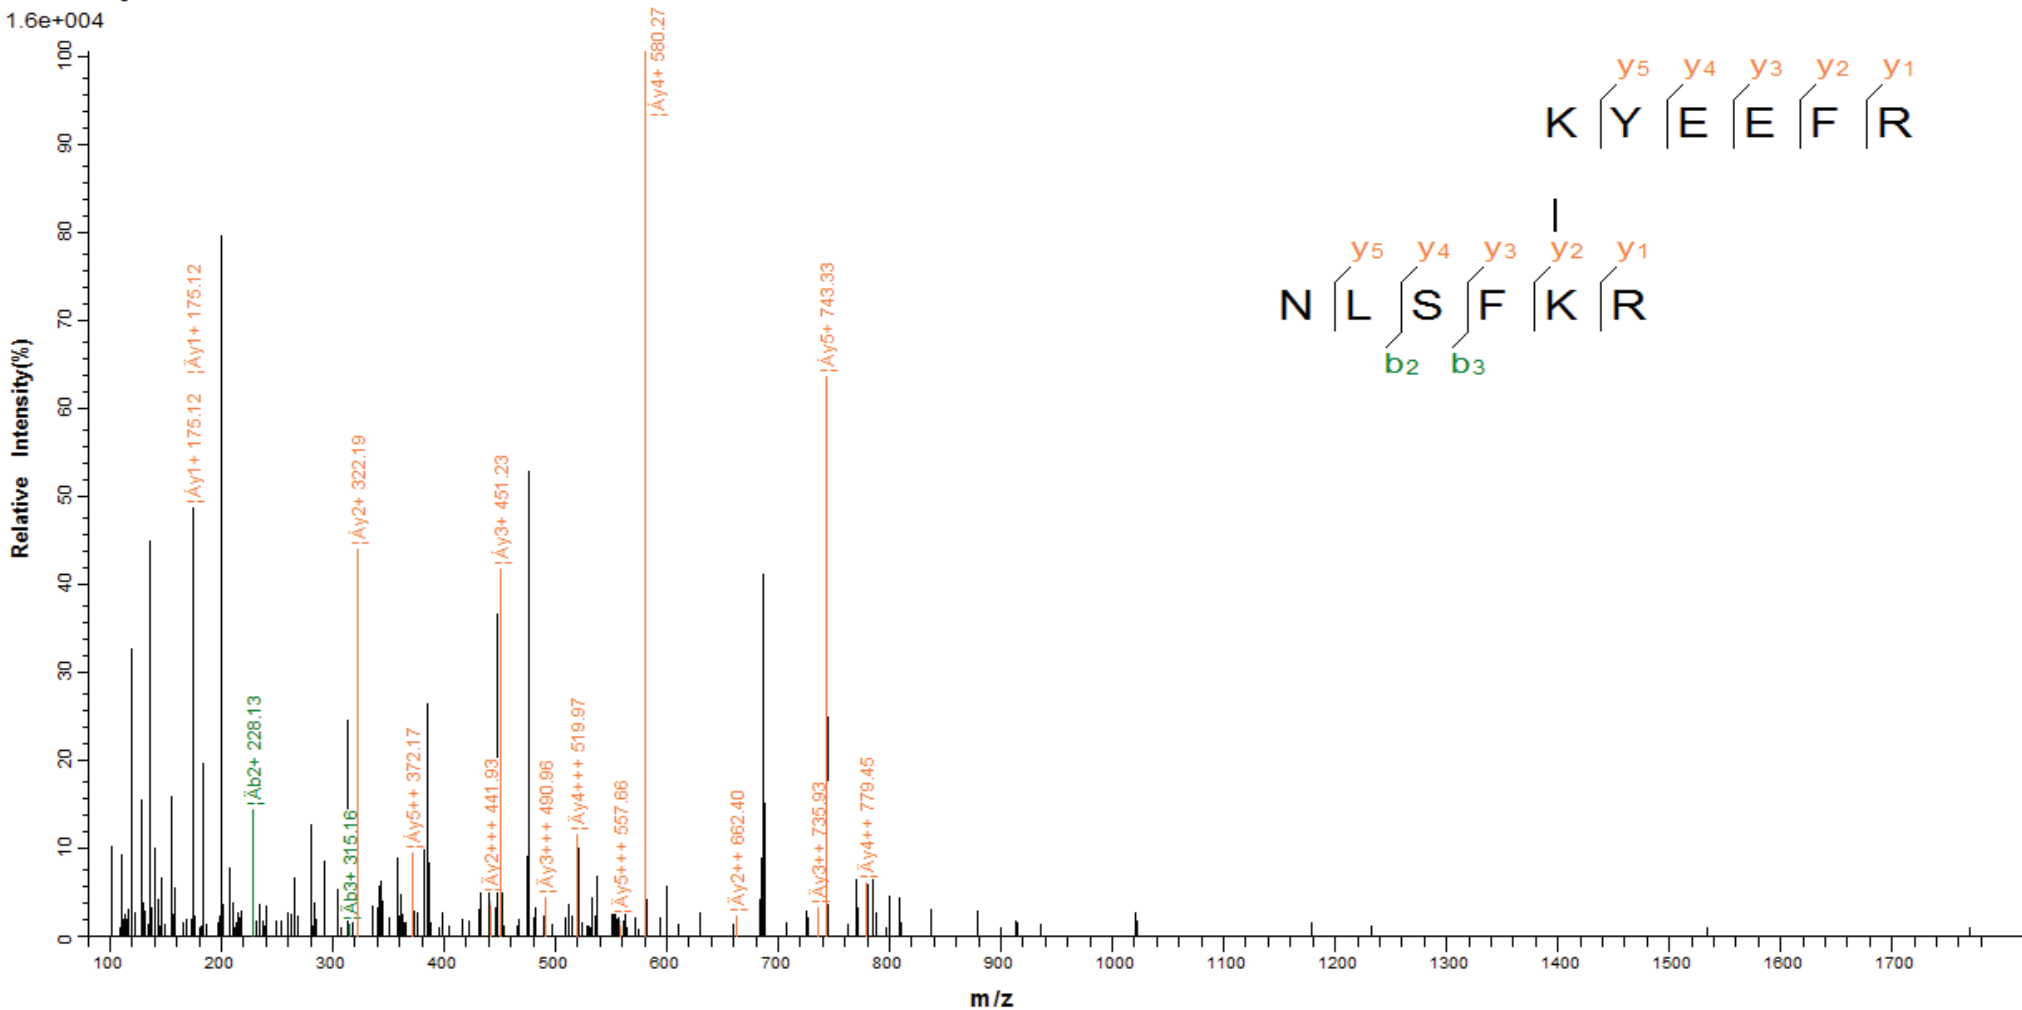

Seq: YADAGNIDTKNNILGSNVLK-PMAFSNTTTHVPEKK

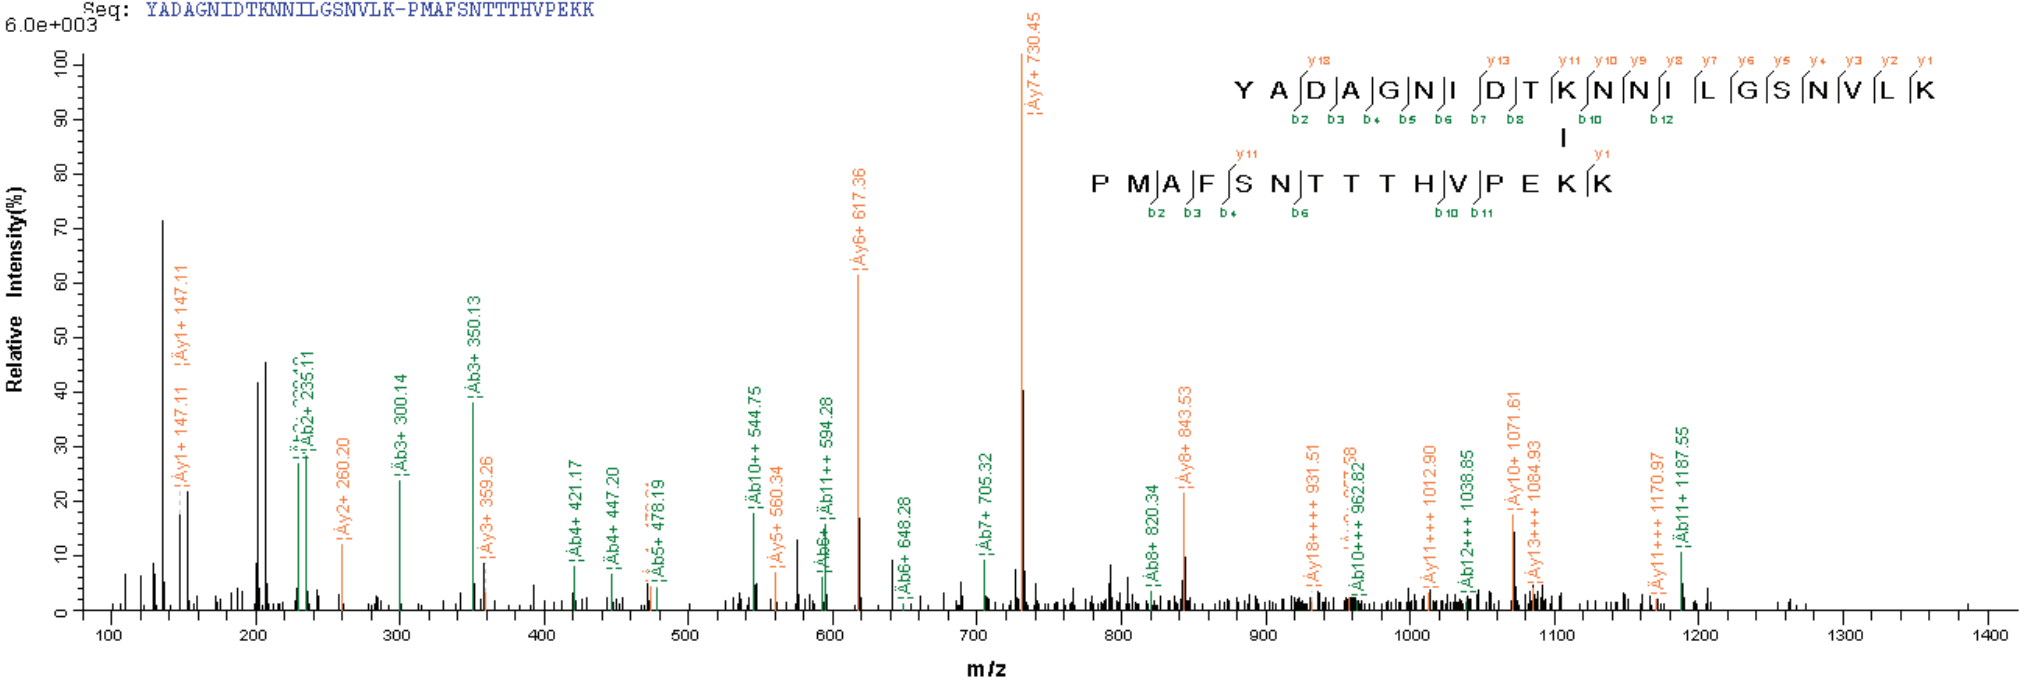

Seq: YADAGNIDTKNNILGSNVLK-KSTDLTPK

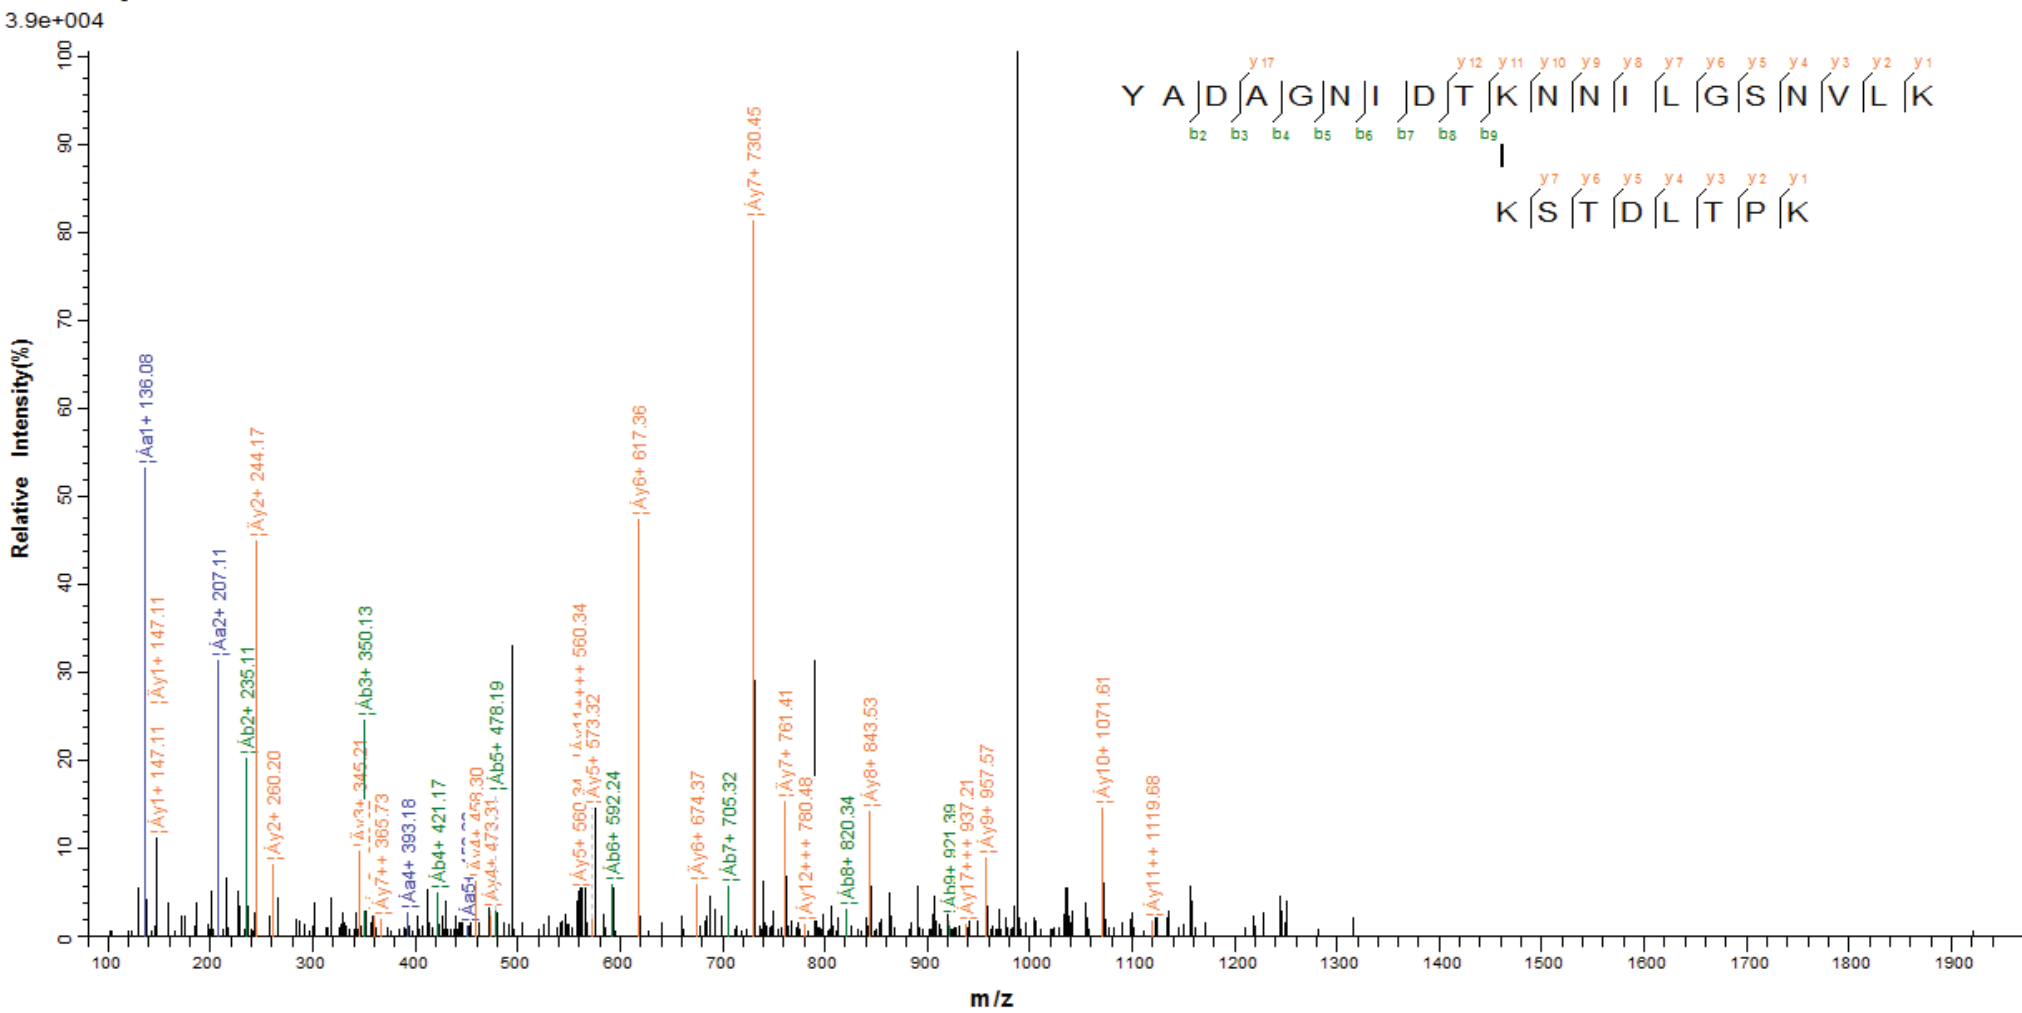



Seq: YADAGNIDTKNNILGSNVLK-VLKSGSGVDSSK

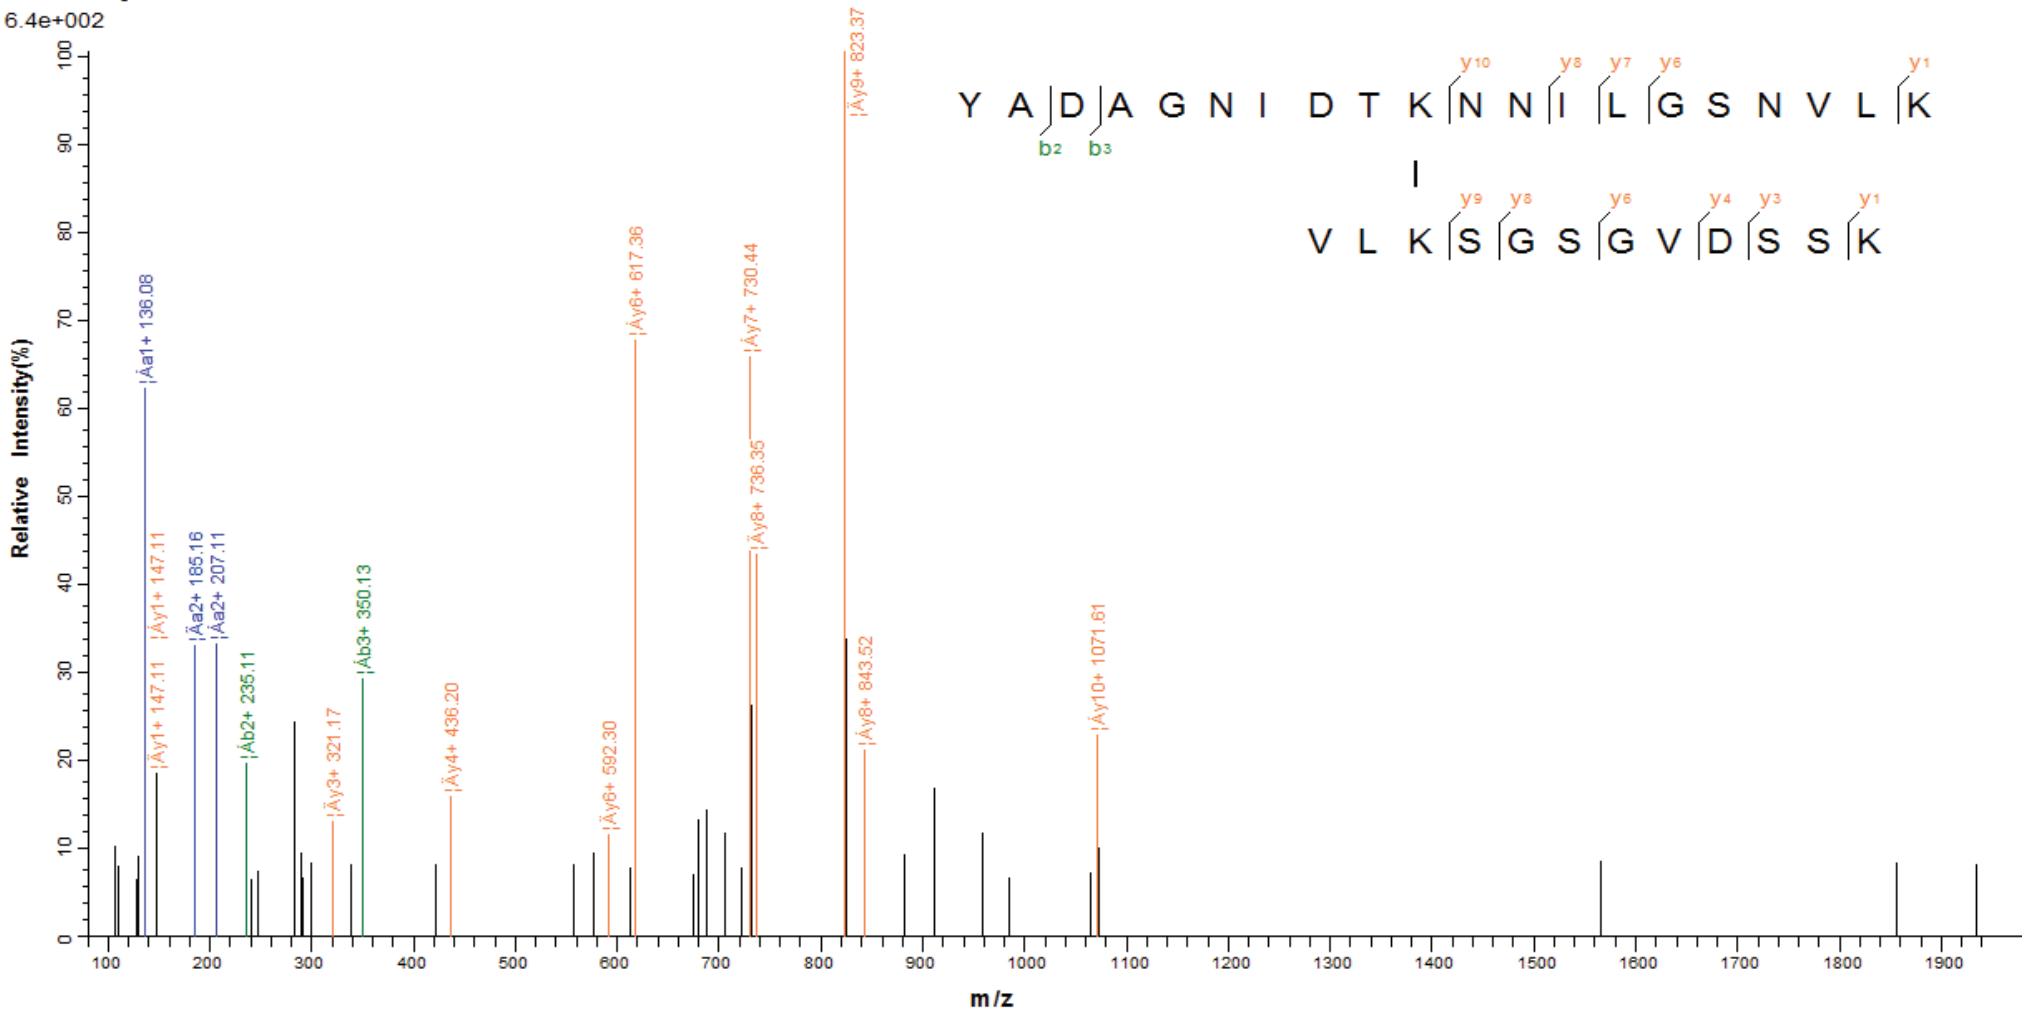

exosome\_A8\_1.004285.004285.4.dta Seq: IIEKSVR-FSKFER

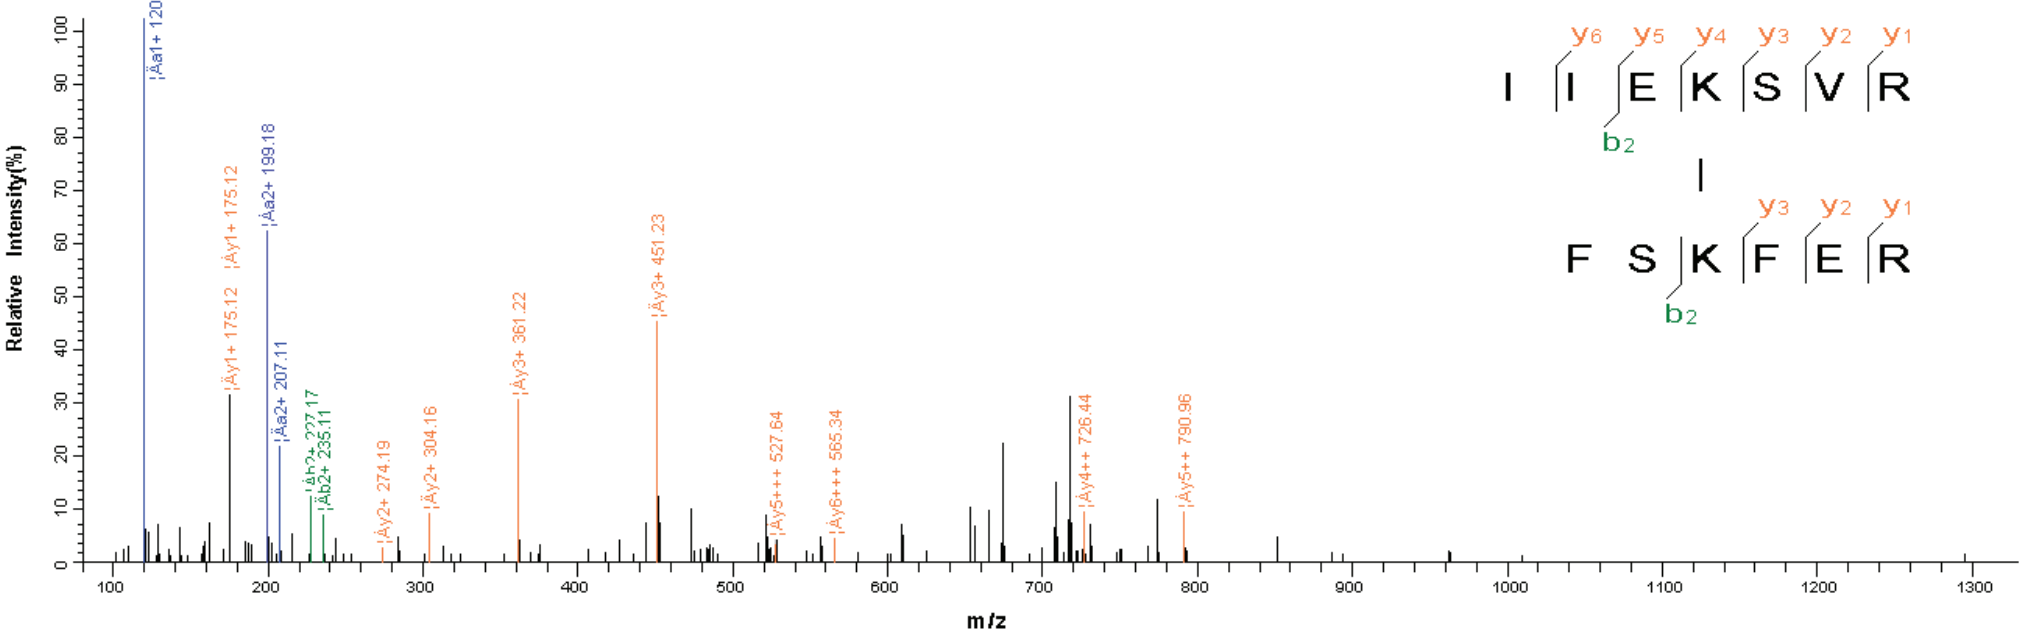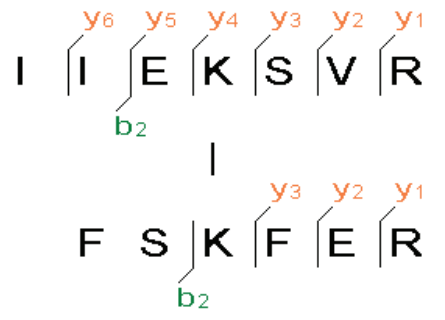

Seq: ITDQILQLLKEDSEKRIYDAFPQTAMLR Mod: 30\_Oxidation\_M\_15.995

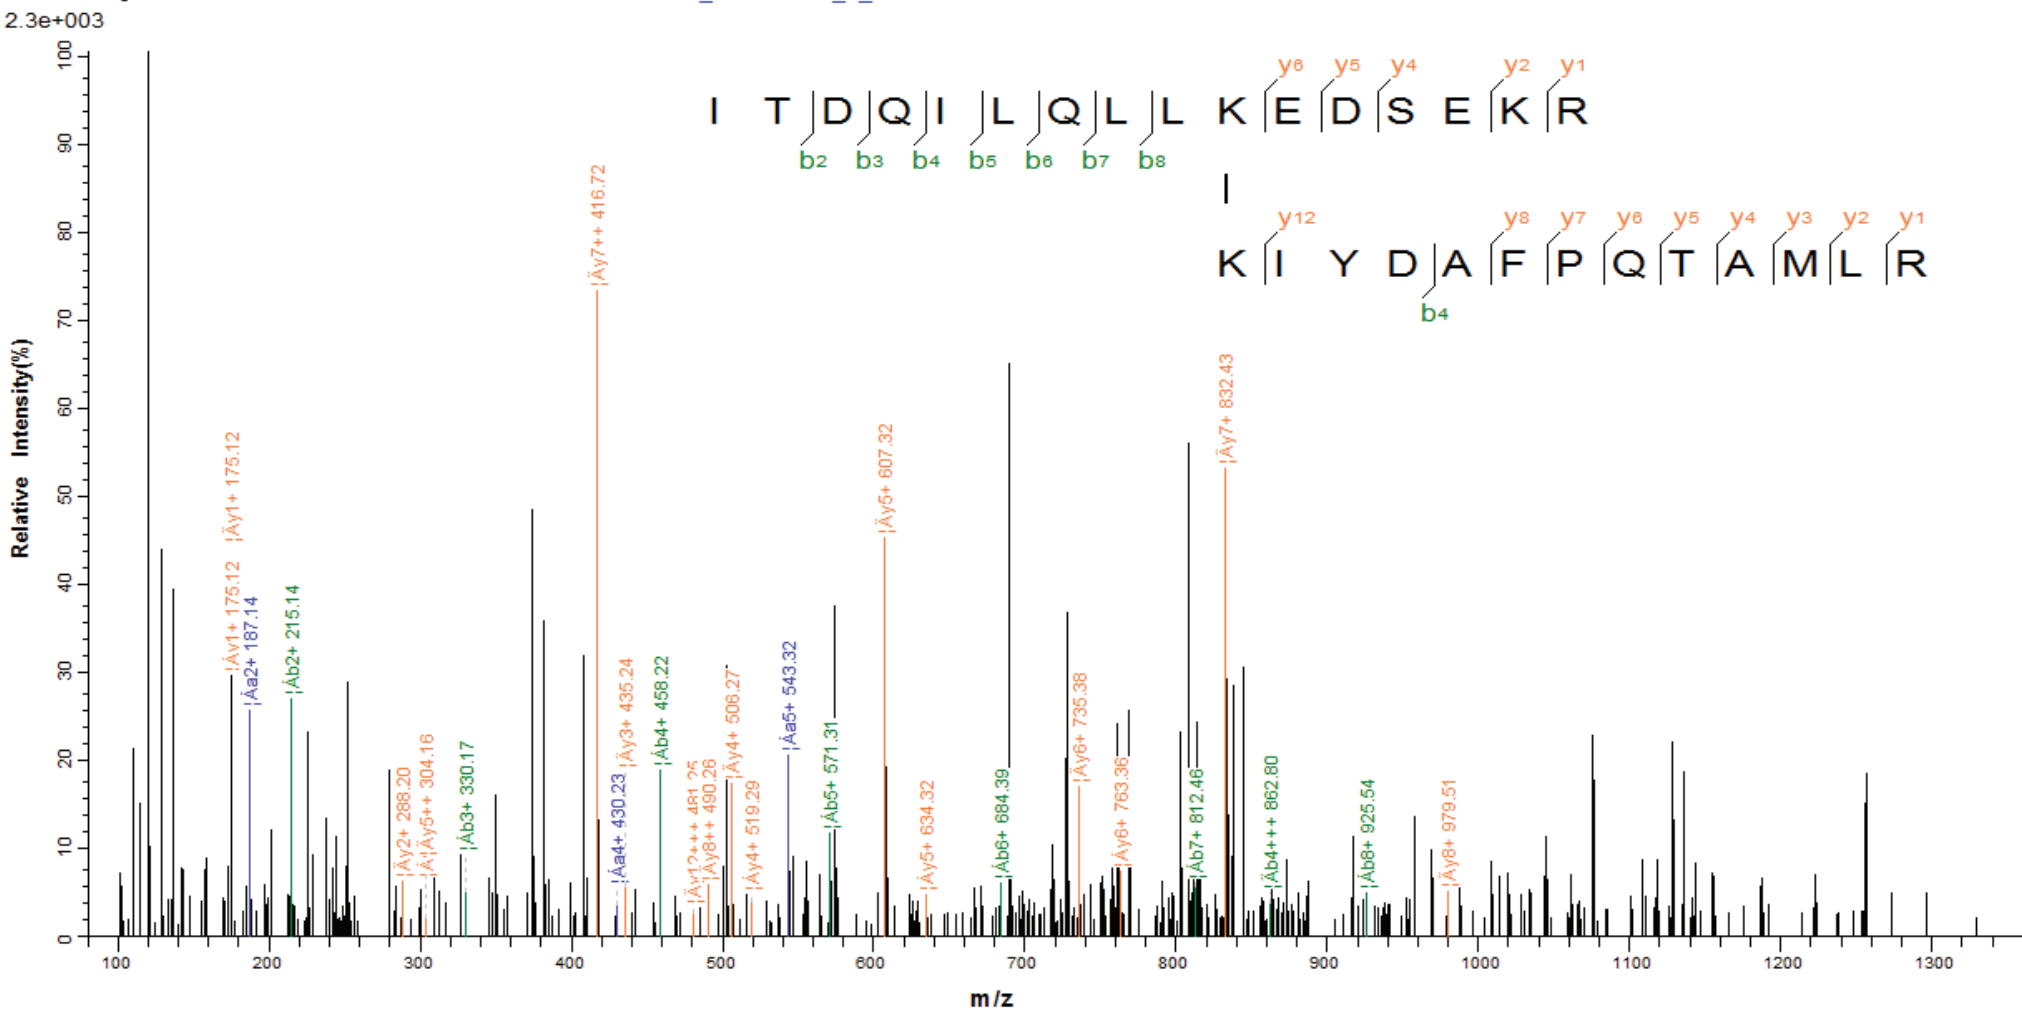

seq: NKYAAMLTSENAR-GTSVYLVDKR

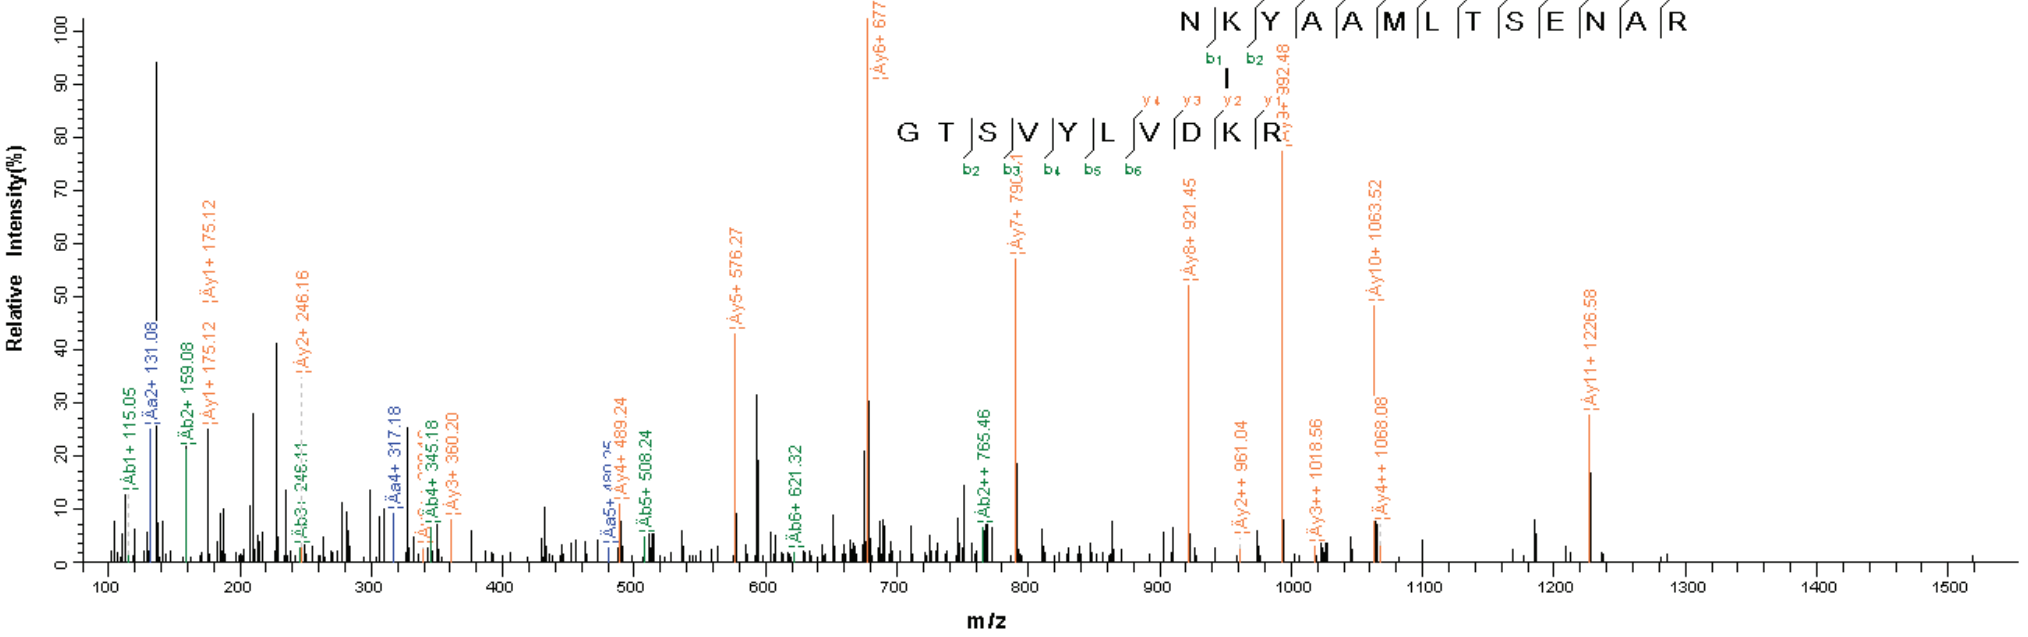

9.9e+002 seq: AKDIEISASESK-LKSQMDTSK

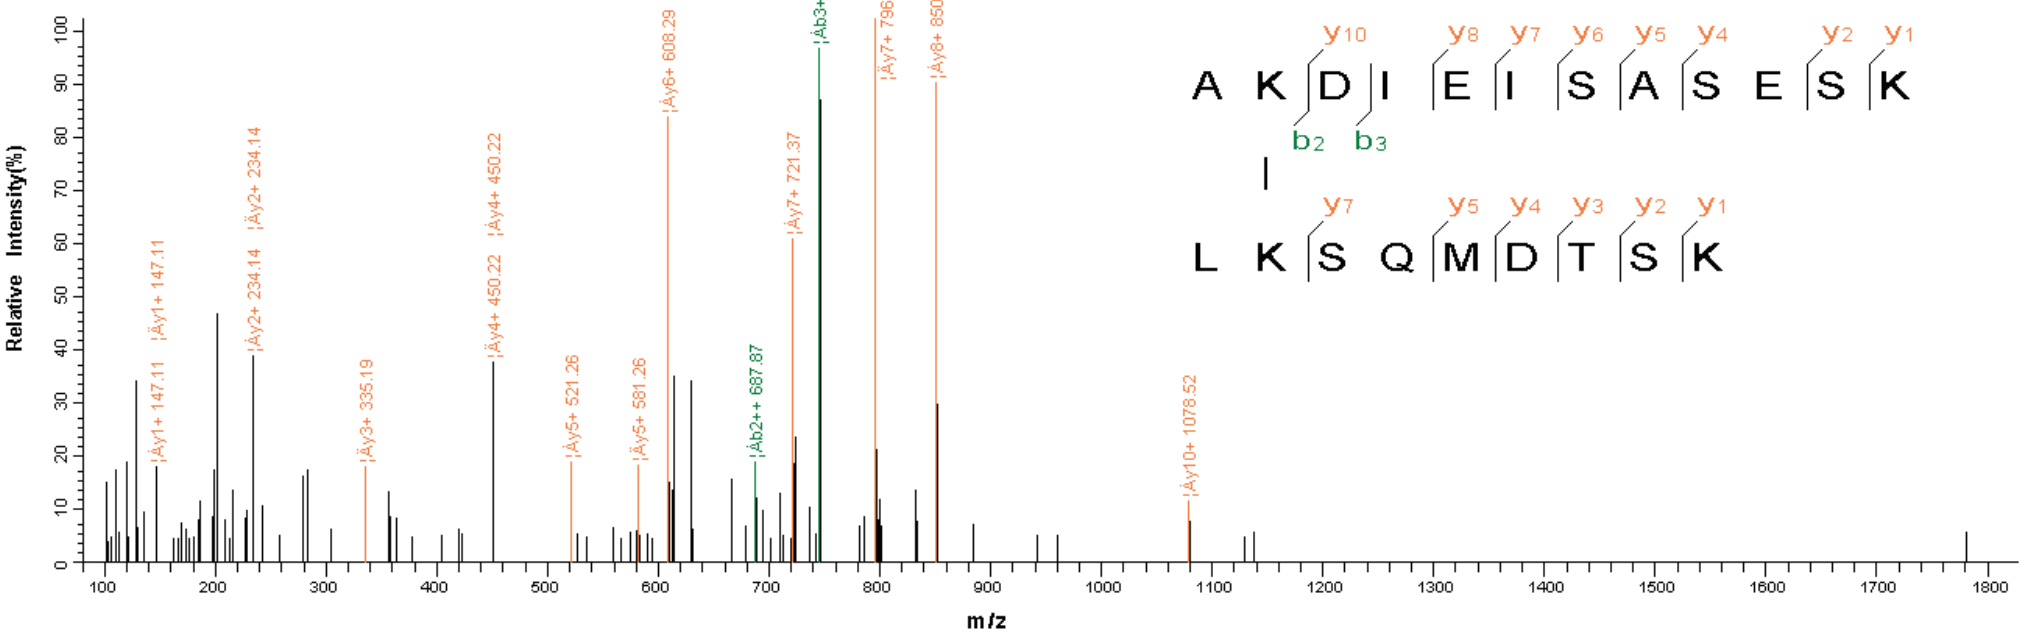

Seq: VICSVTGPIEPKAR-LKSQMDTSK Mod: 3,C\_57 22,\_Oxidation\_M\_15.995

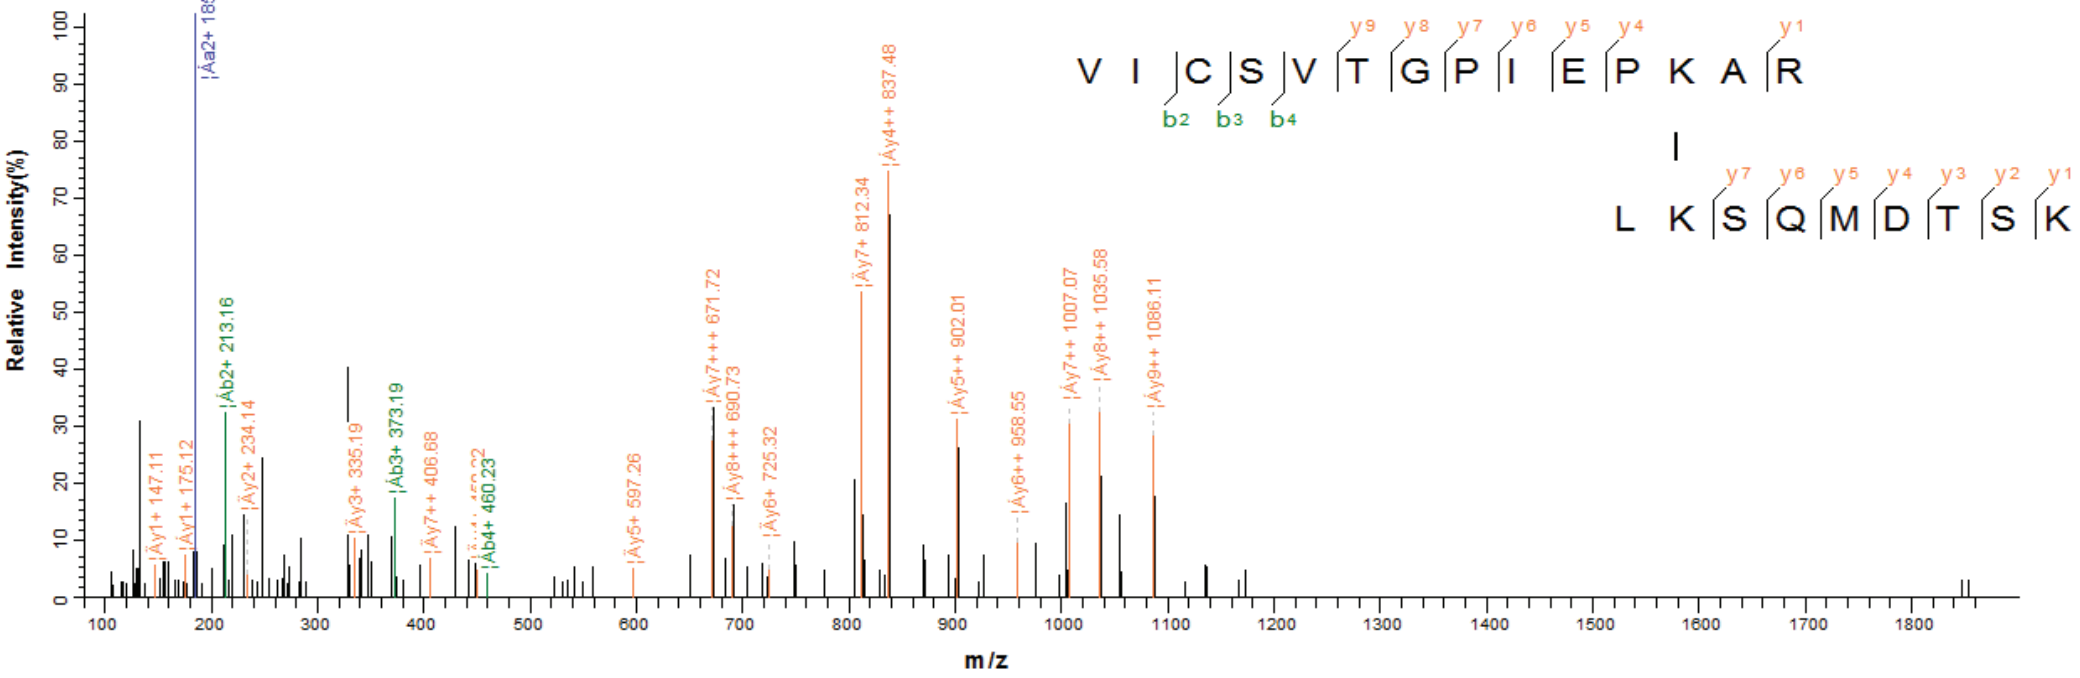

Seq: LNCAINSKSR-ITKSNEK Mod: 3,C\_57

2.2e+003

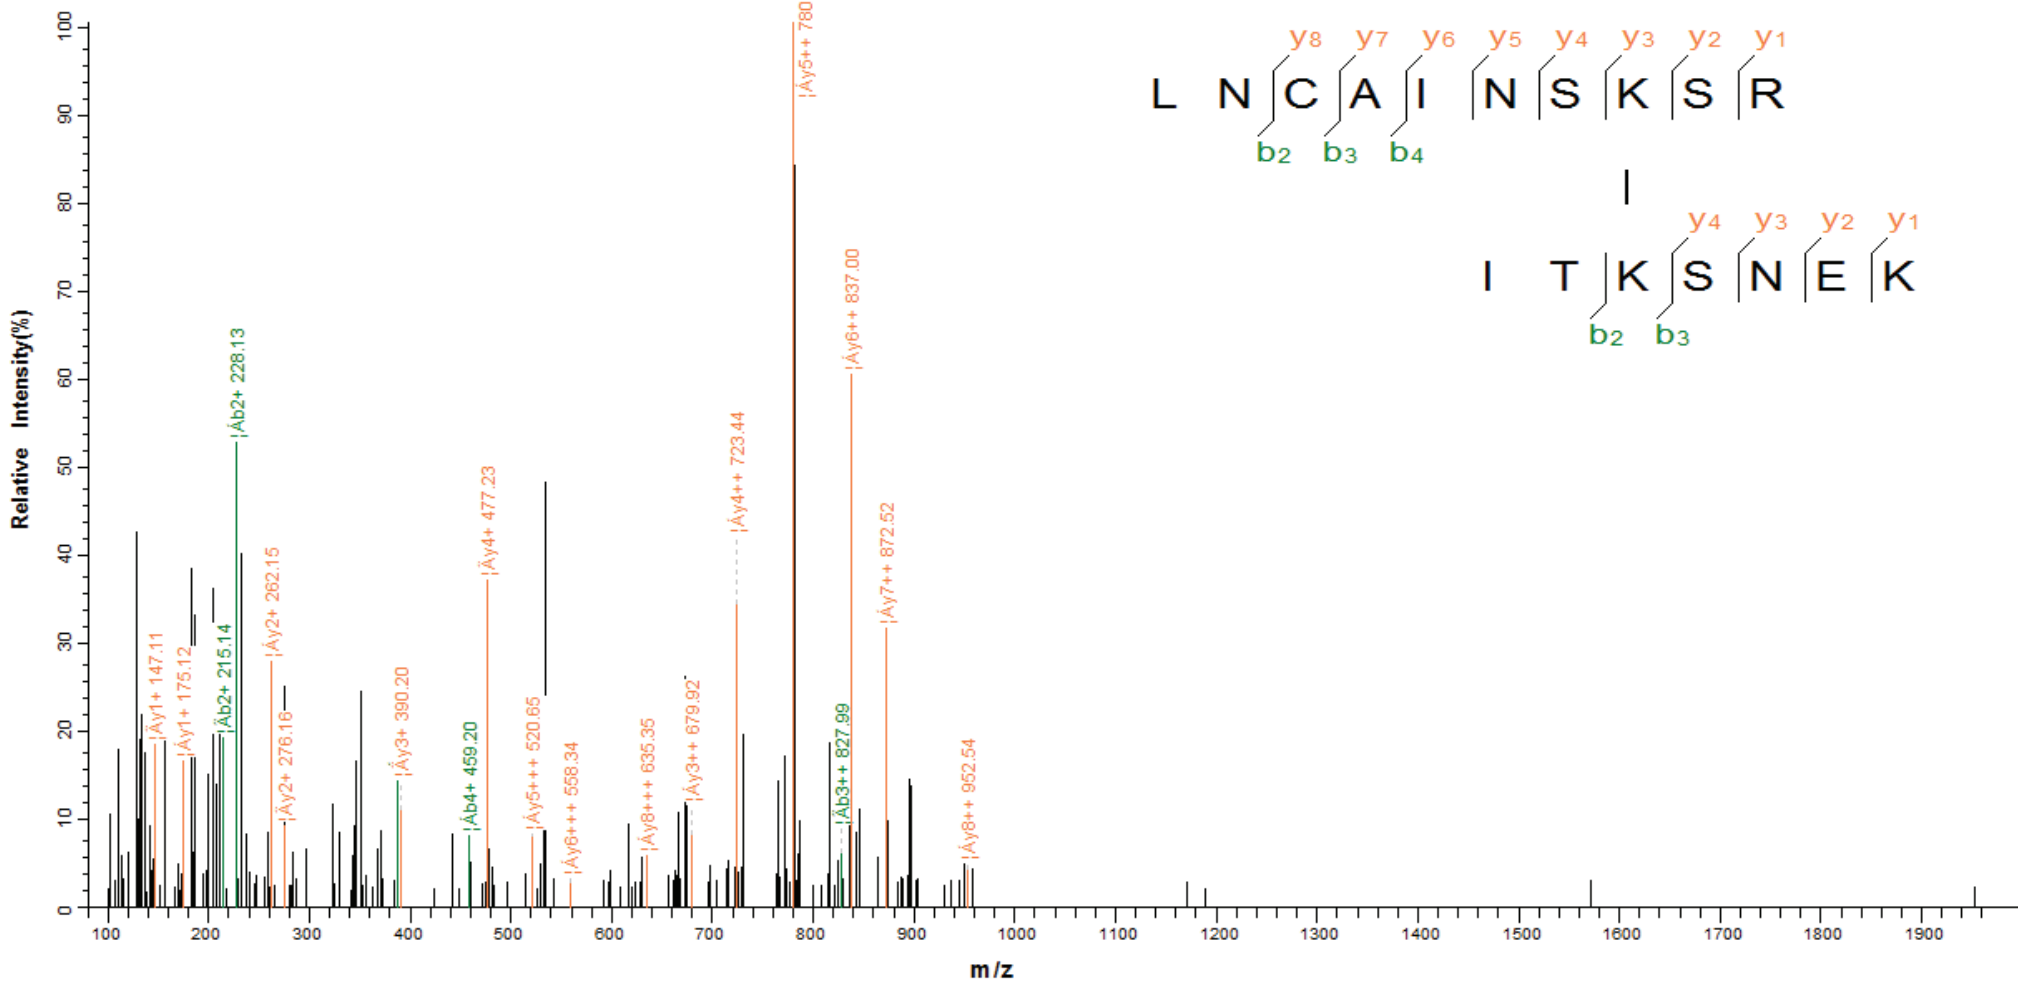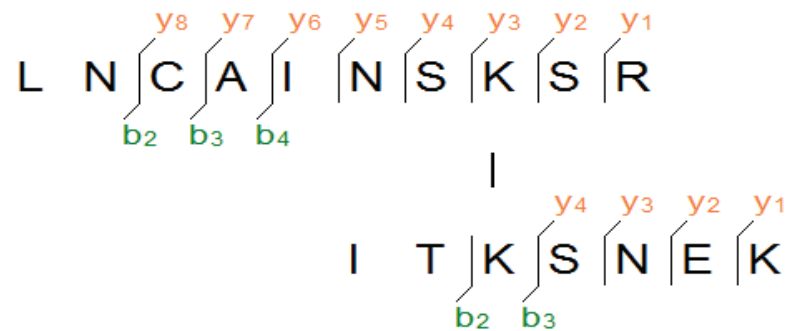

Seq: GSDLQYLGEFSGKNFSPTK-KYEEFR

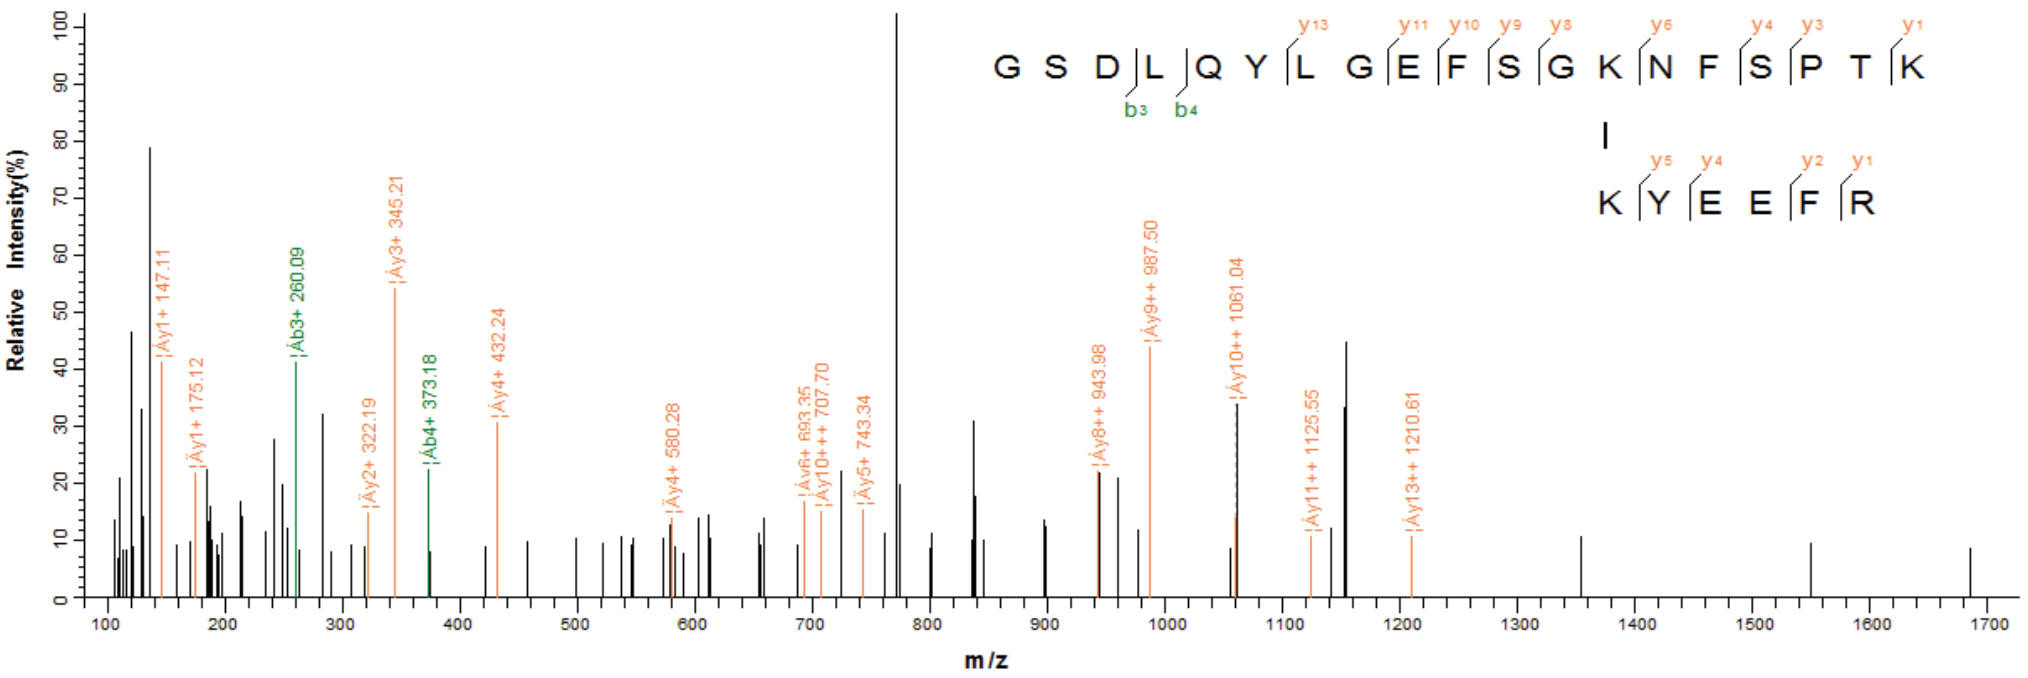



exosome\_A9\_140503145423.1764.1764.4.dta Seq: LNCAINSKSR-ITKSNEK Mod: 3,c\_57

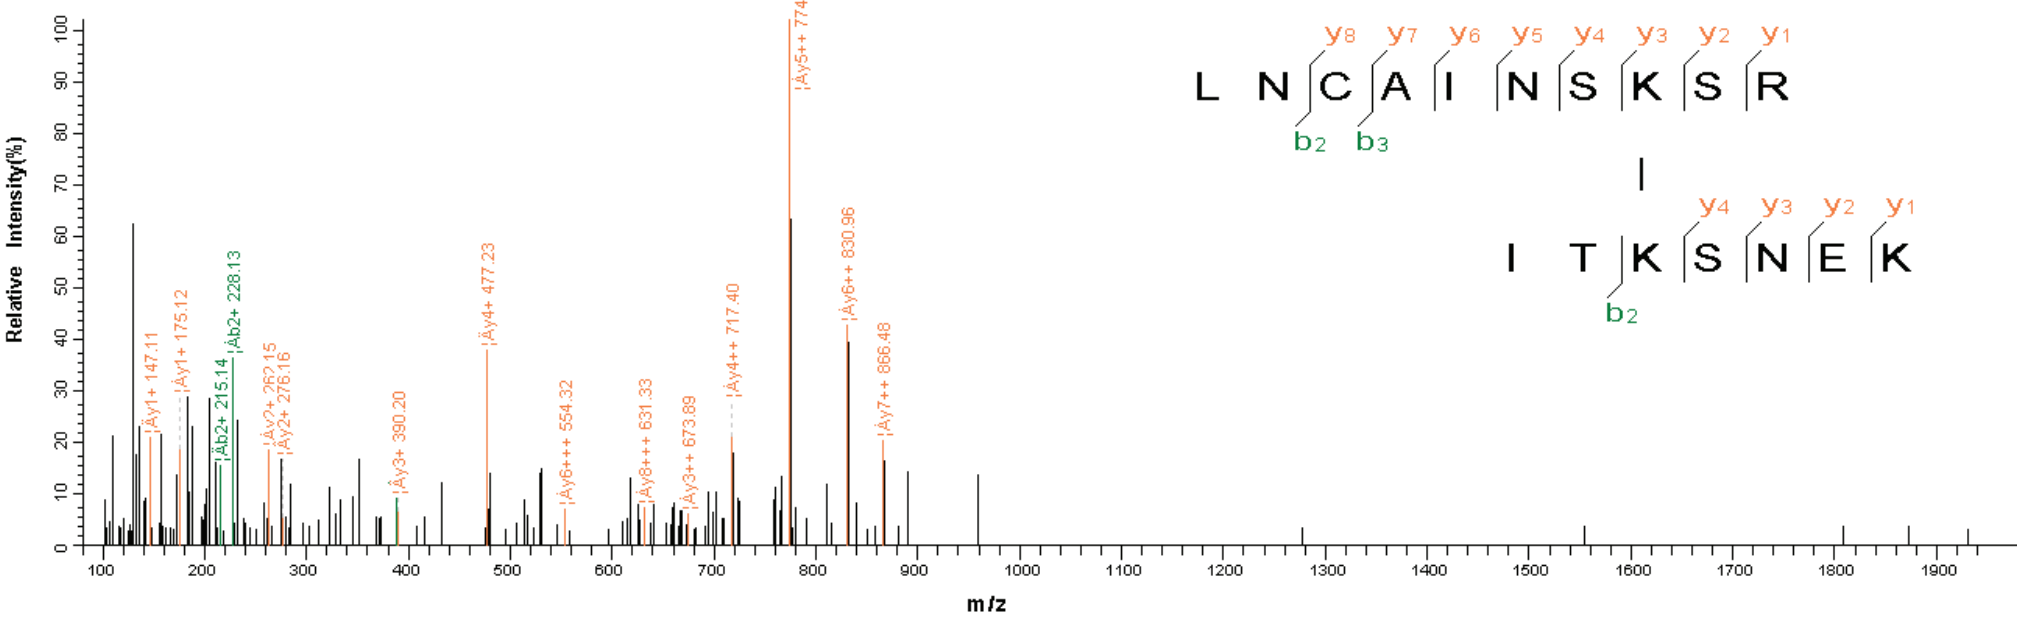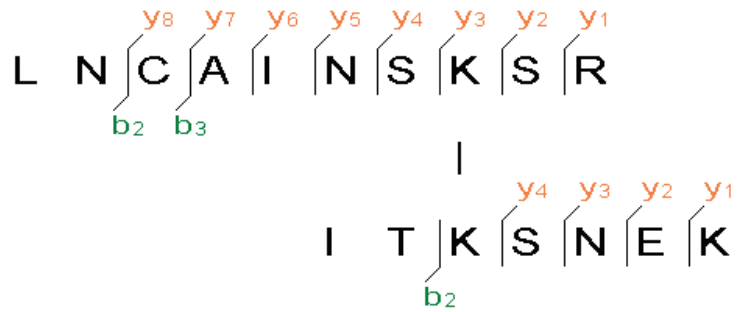

Seq: KYQLADWR-AKQYDNR

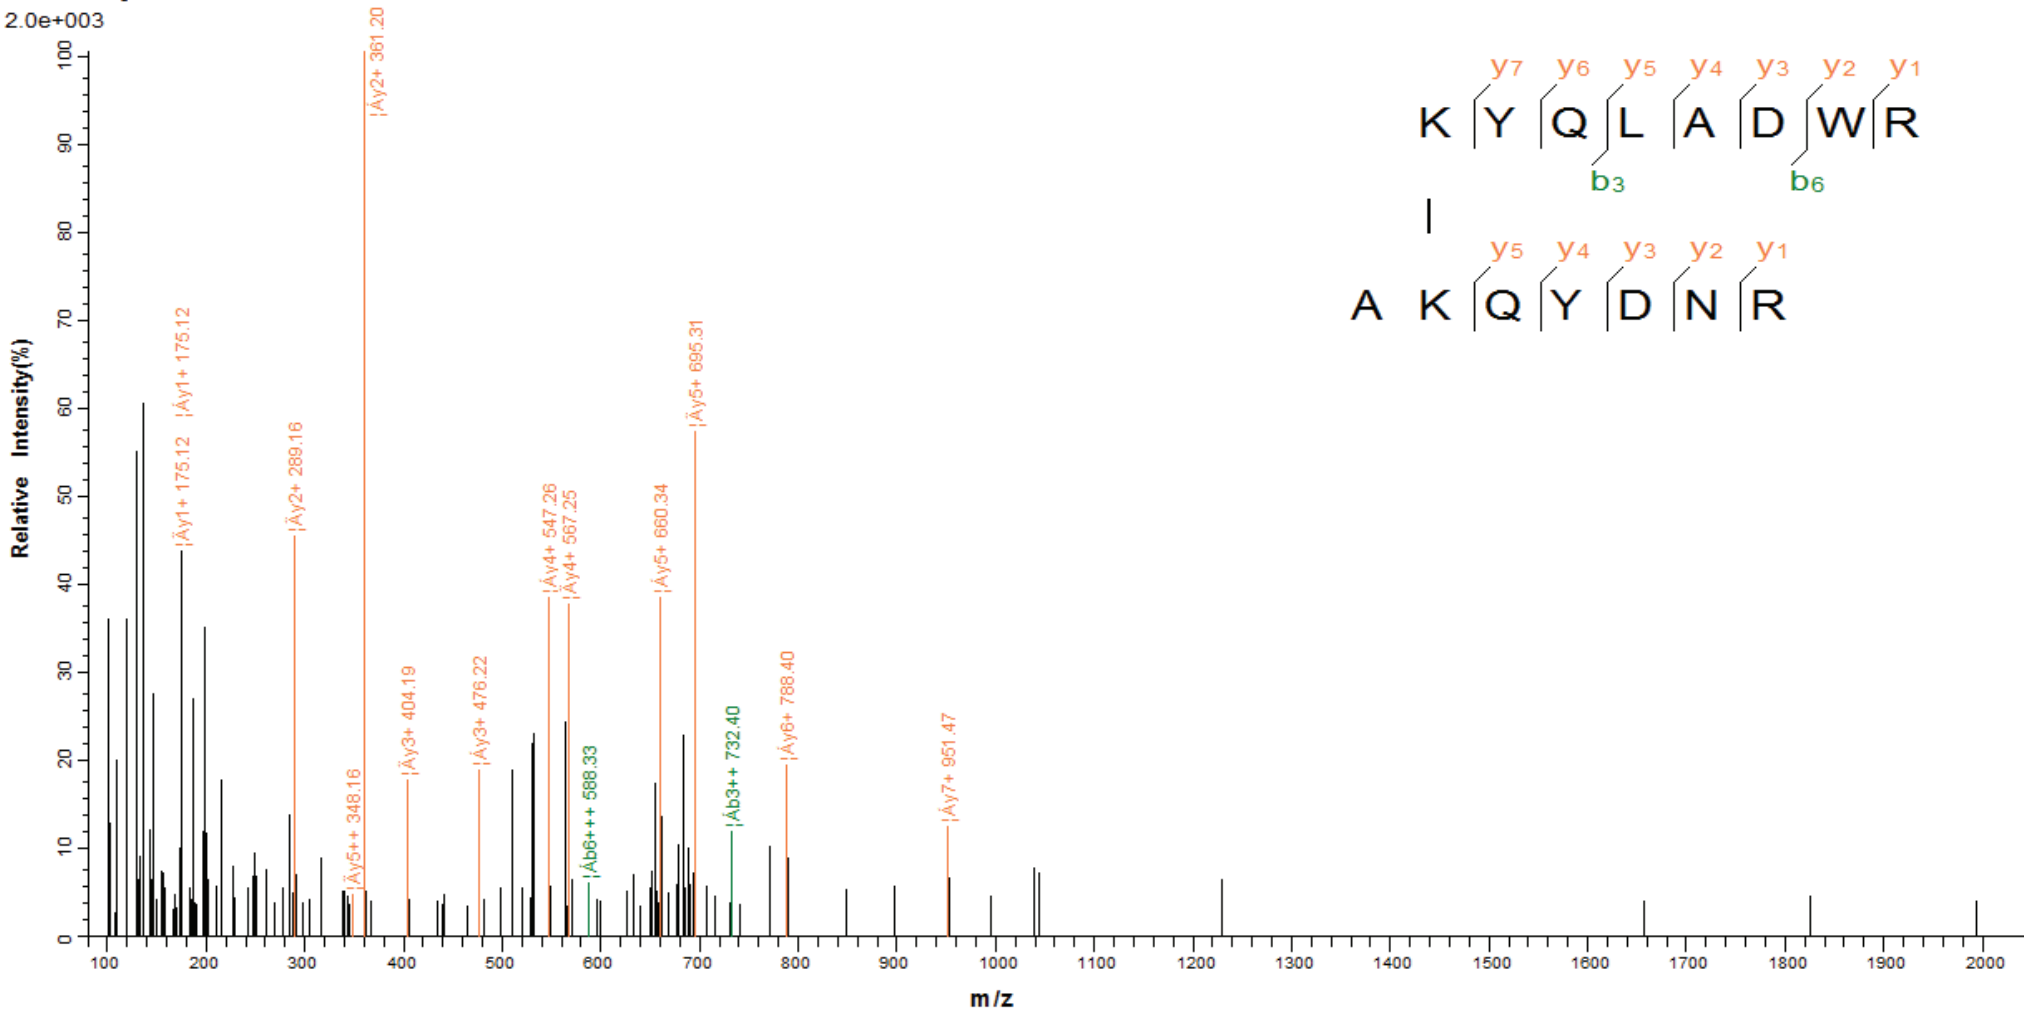

exosome\_A9\_140503145423.3082.3082.4.dta Seq: GFSKDLK-IKPYVR

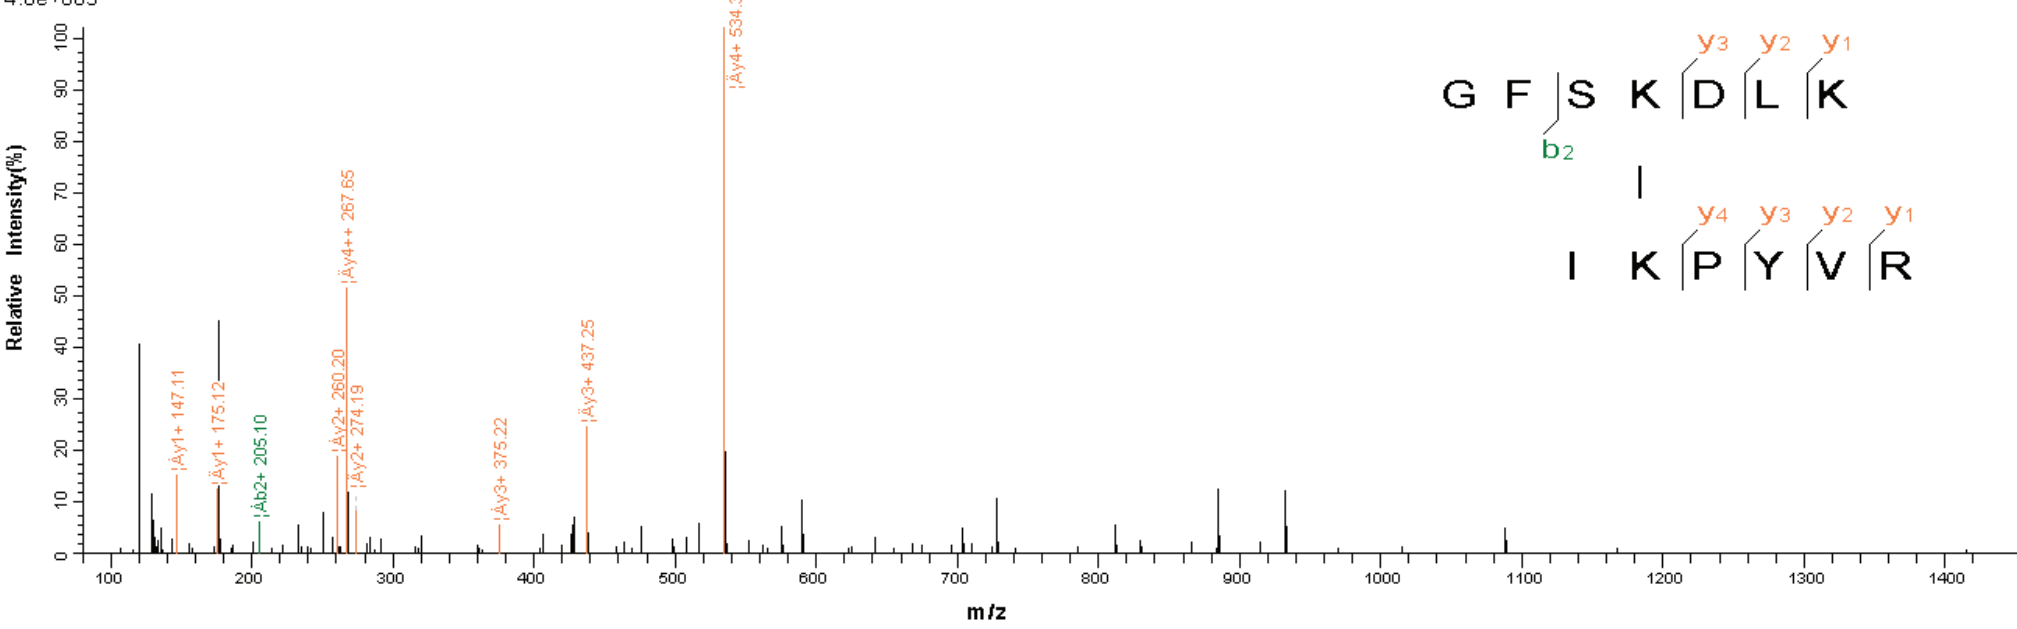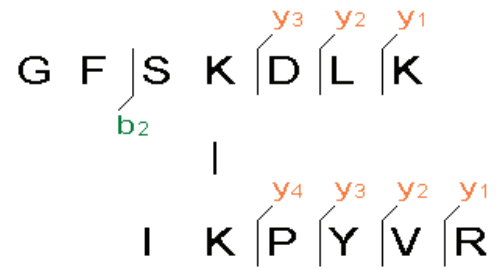



Seq: YRPLTPSSEVYSPIEKESPWK-KSEDELQMR

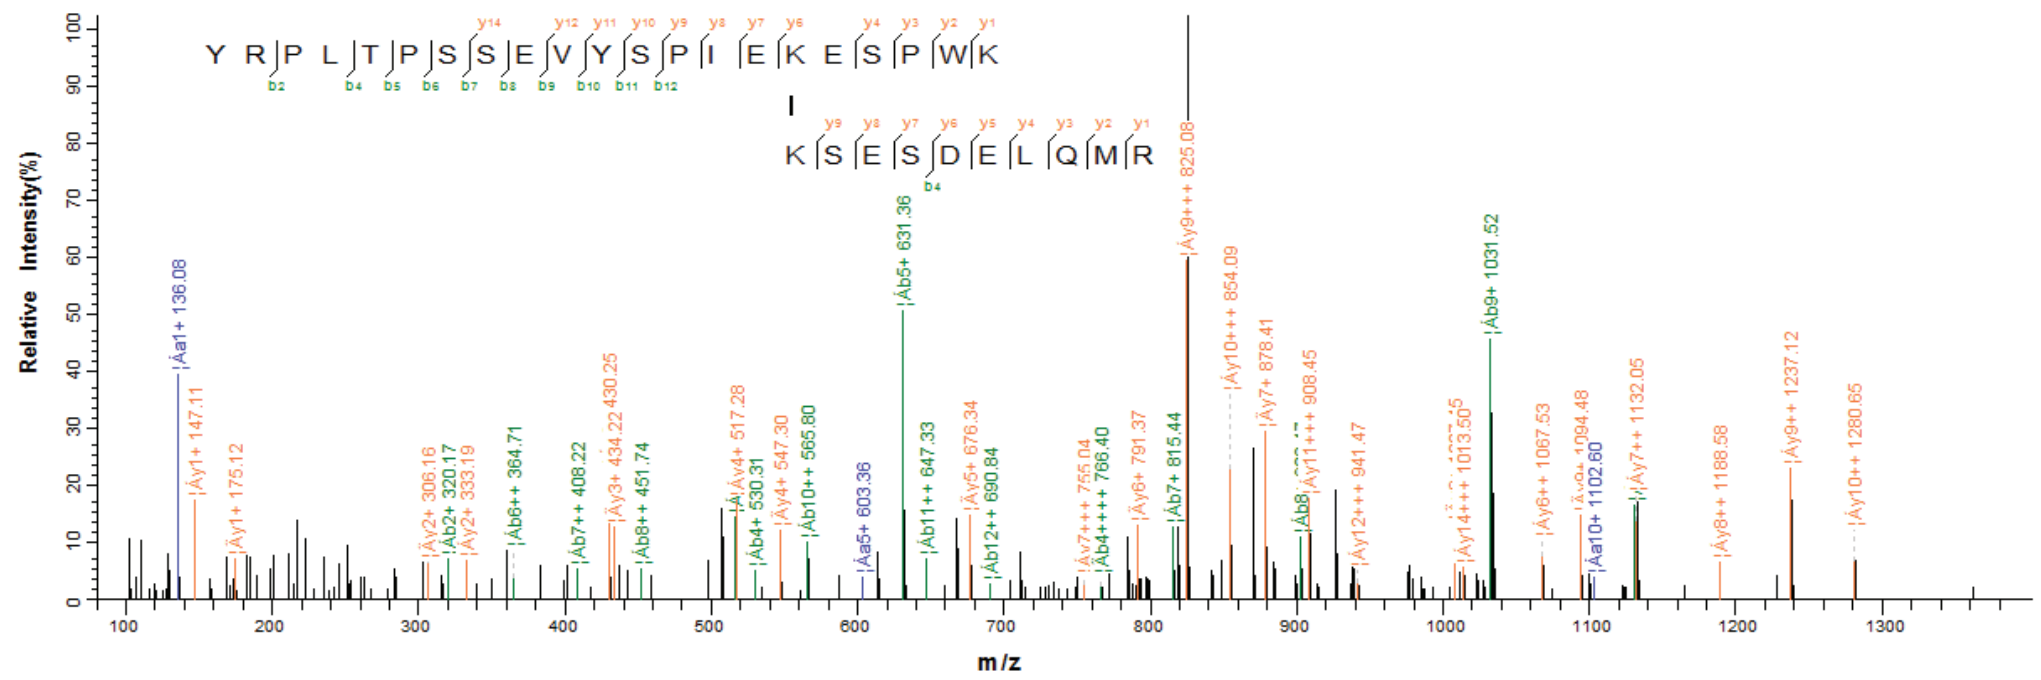

Seq: YRPLTPSSEVYSPIEKESPWK-KTSQMDLAR

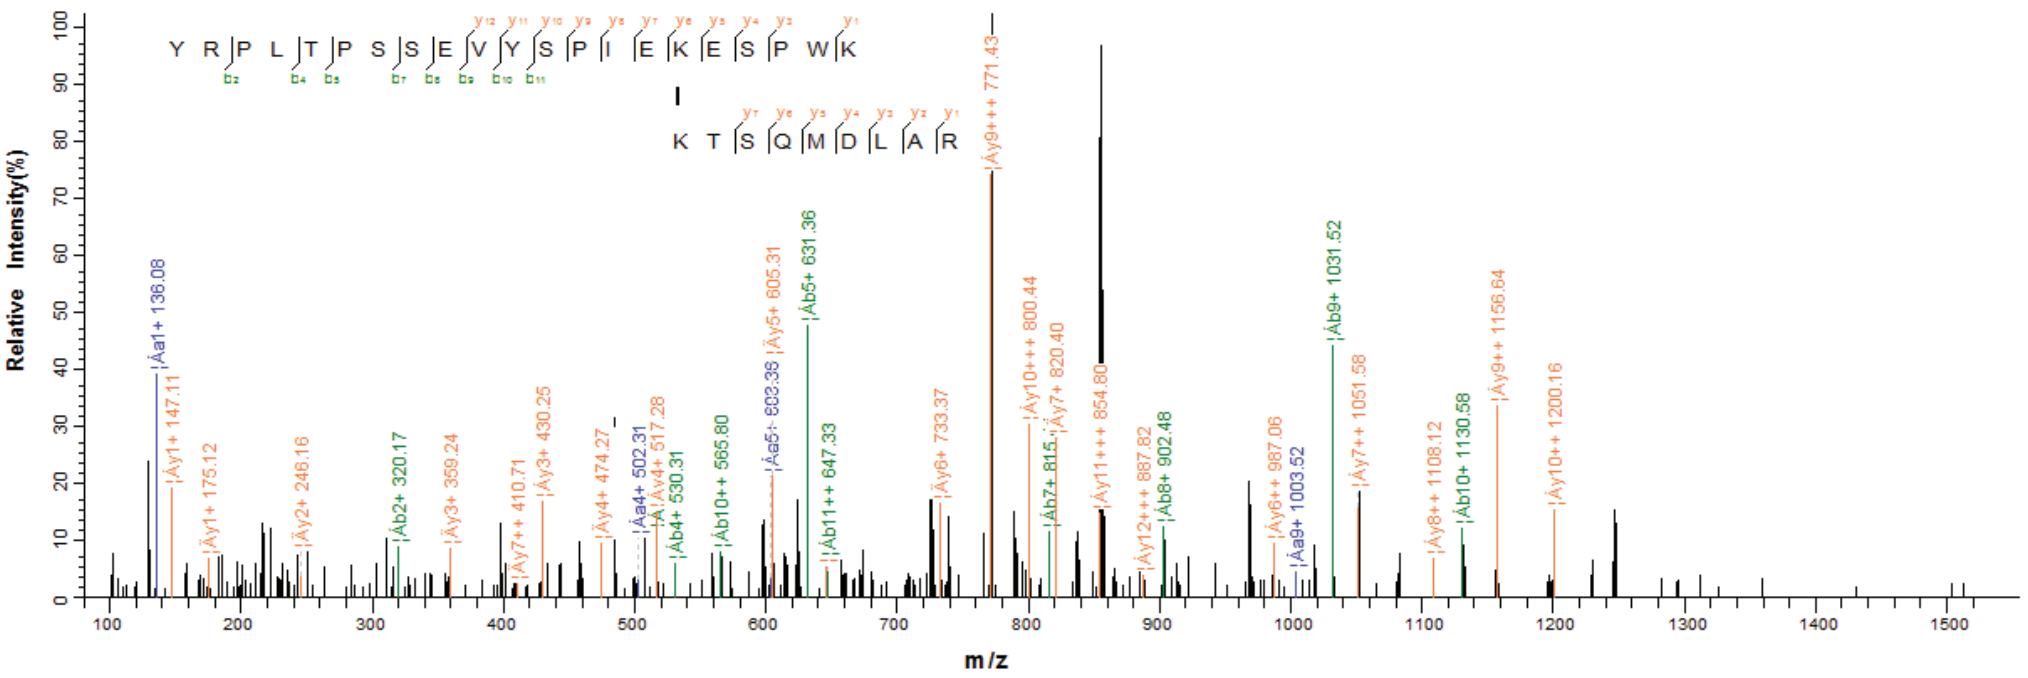

Seq: NIKNTNEEATPIPSSETK-IAEVGNKR

5.2e+002

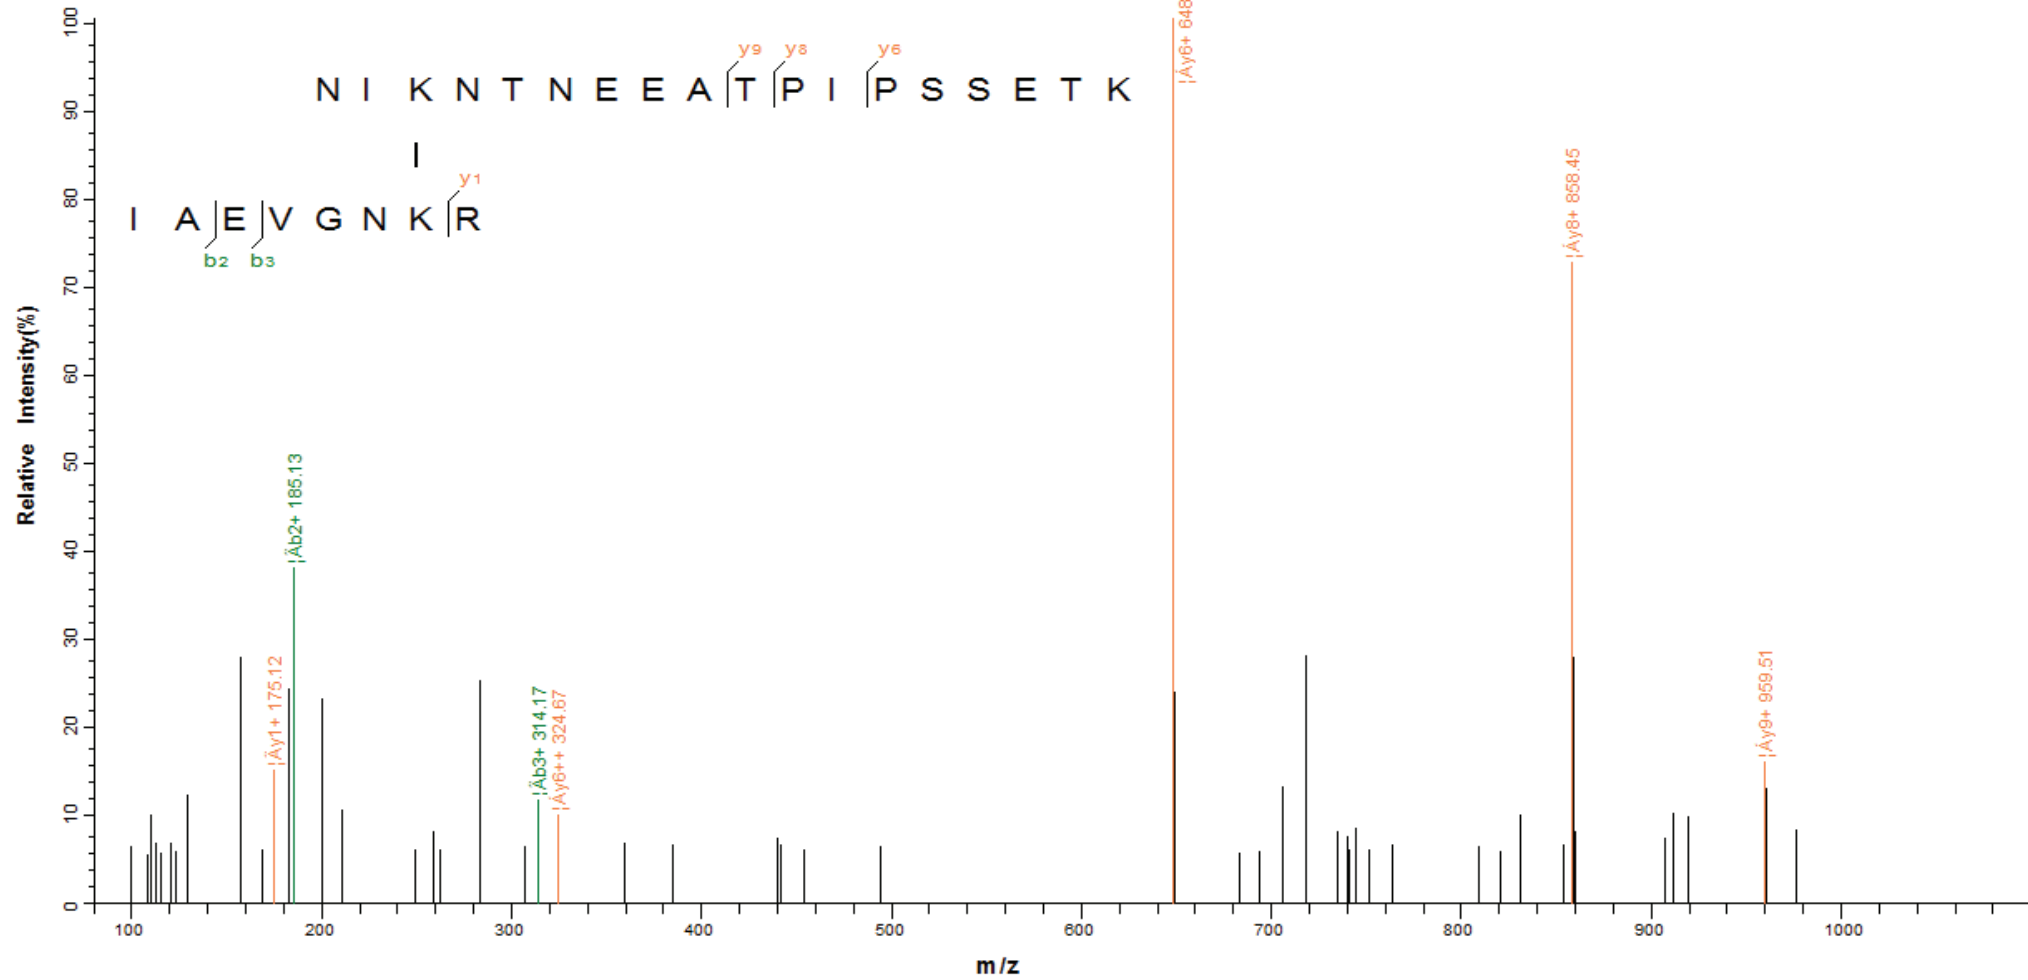

seq: NIKNTNEEATPIPSSETK-KSESDELQMR Mod: 30,\_Oxidation\_M\_15.995

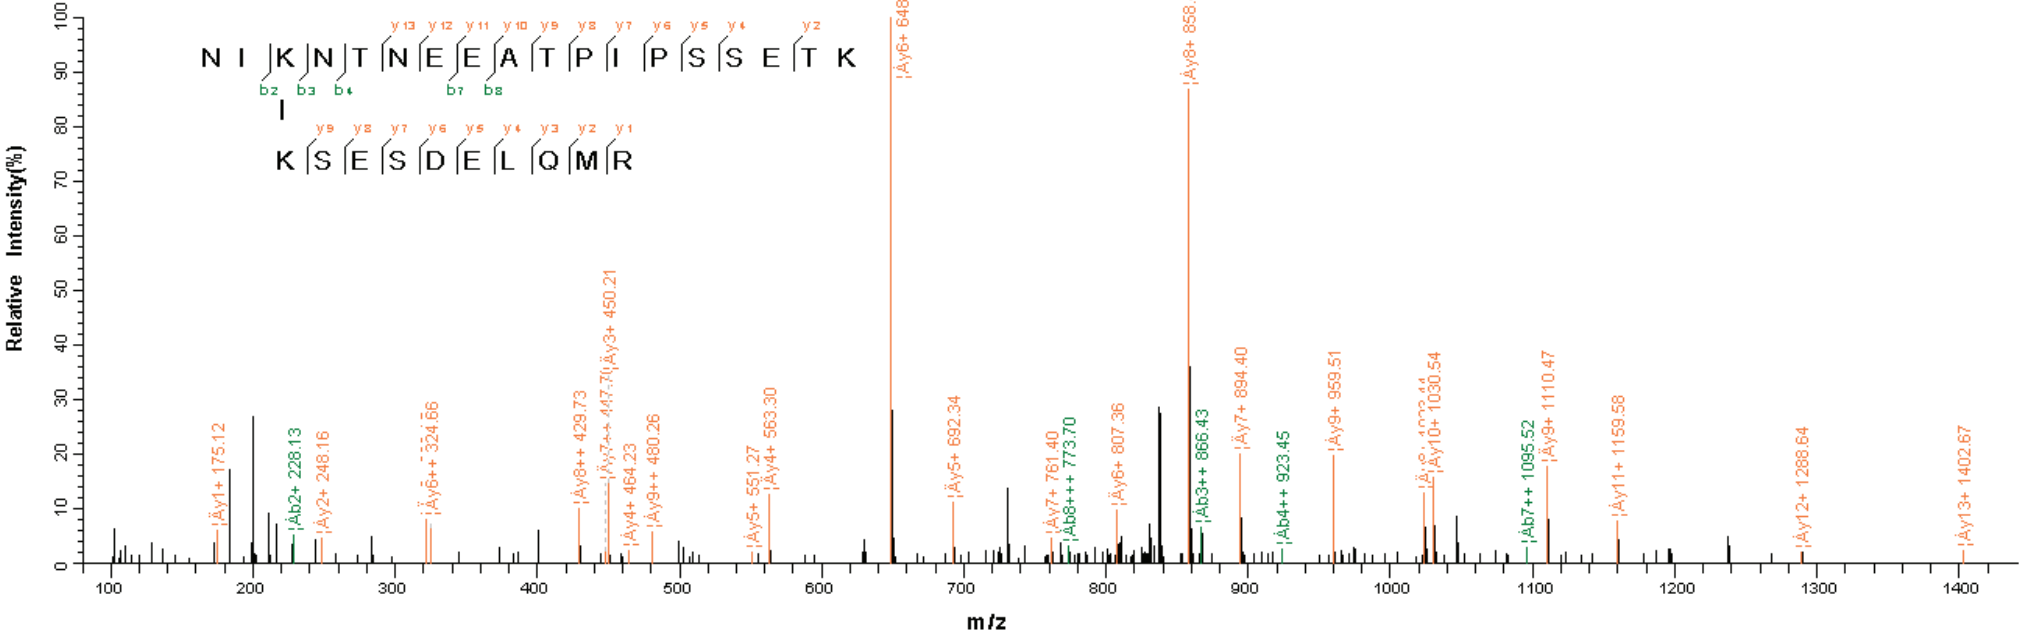



Exosome\_GFP\_test\_A78.002120.002120.5.dta Seq: LLGPAAAKPMAFSNTTTHVPEK-KSTDLTPK Mod: 10,\_Oxidation\_M\_15.995

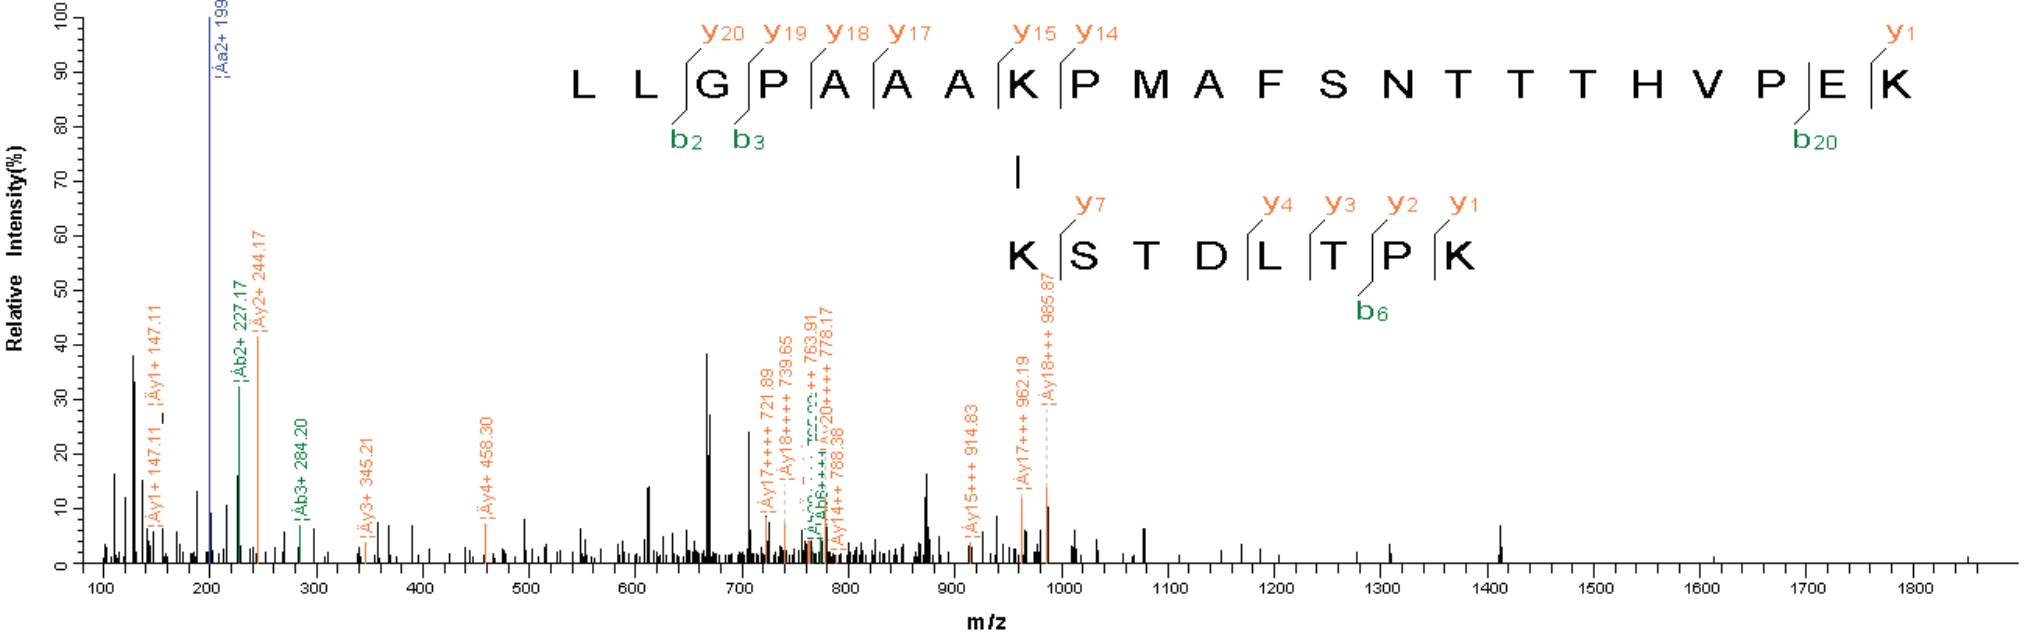

exosome\_A9\_140503145423.2701.2701.4.dta Seq: FSVLCNSNISKSR-KTNK Mod: 5,c\_57

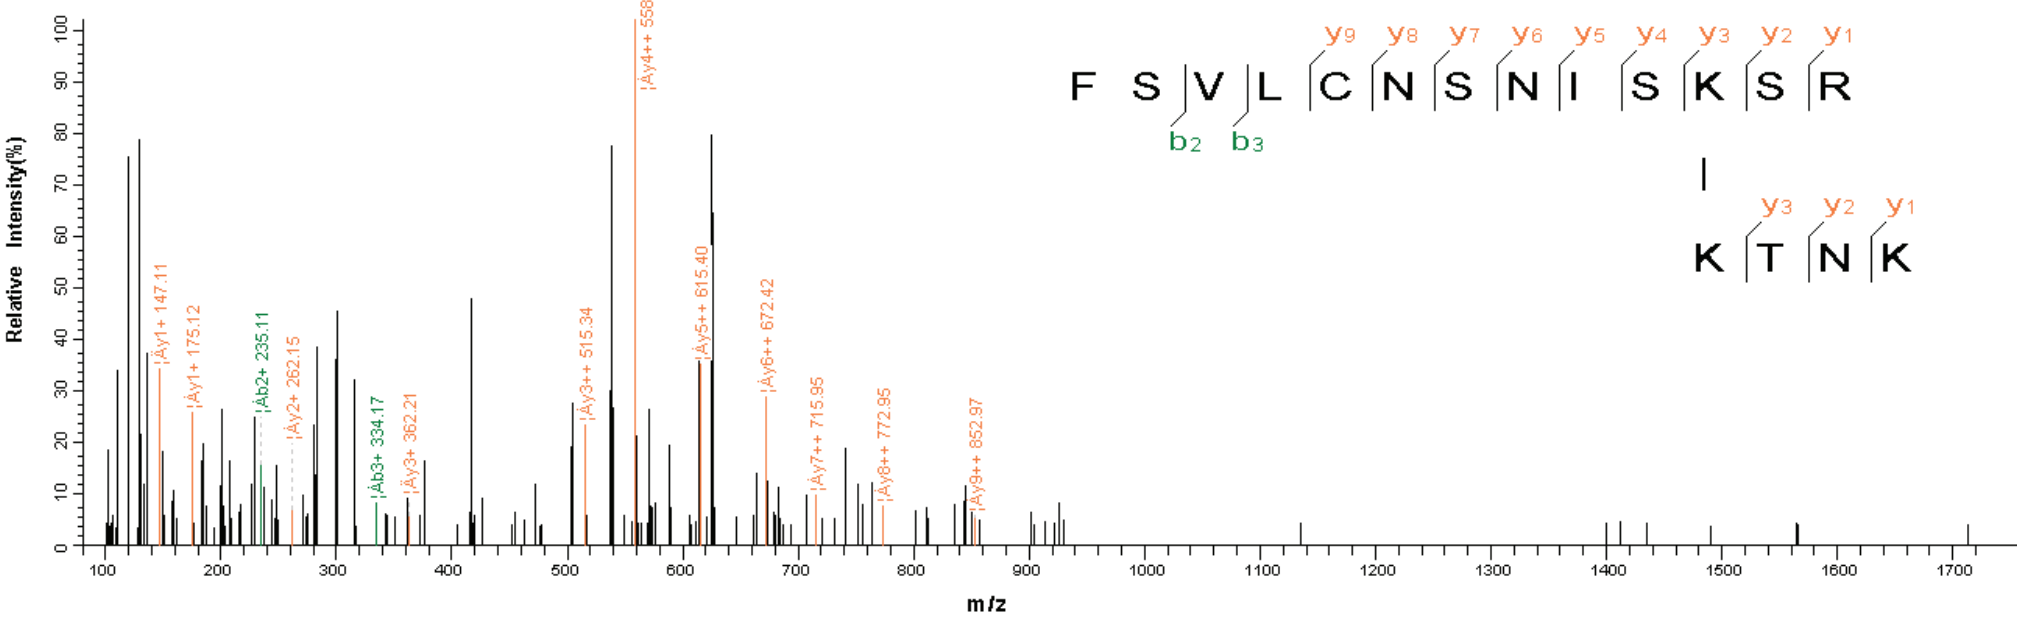

Seq: EEHDIAYSKDGLPNK-ITPEMIKR

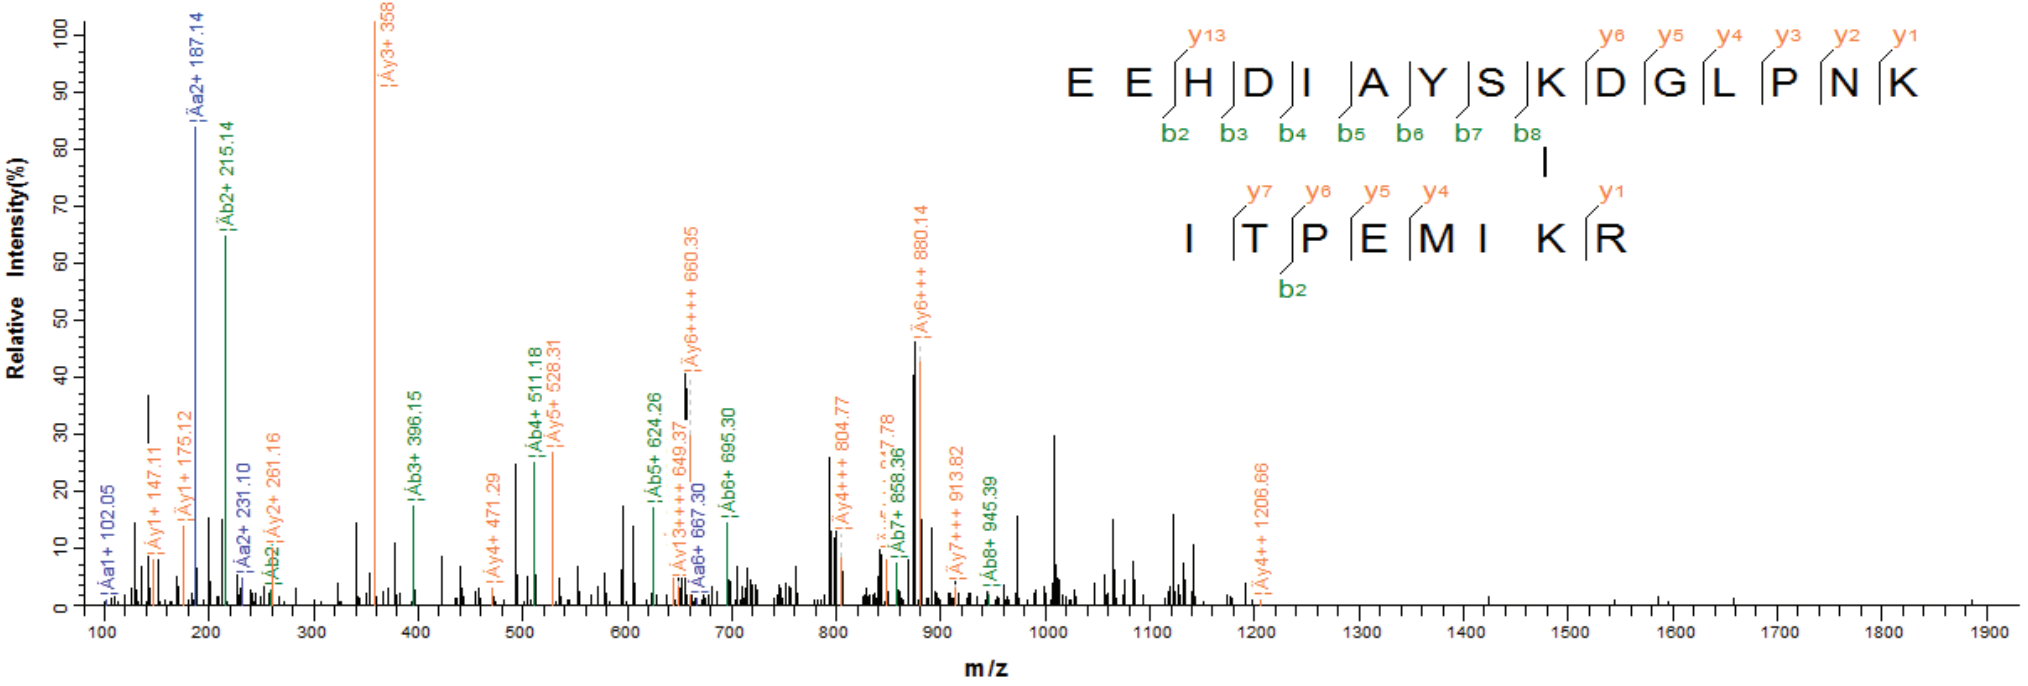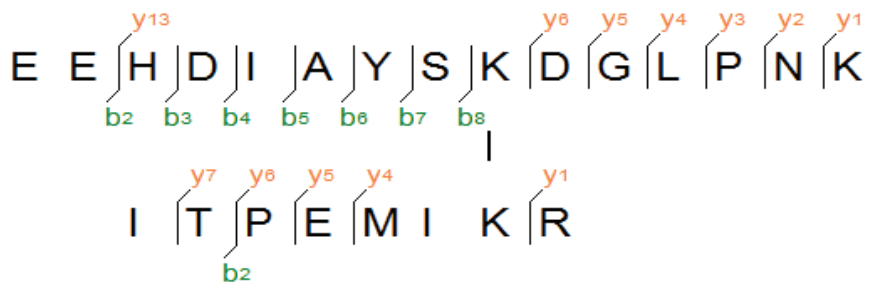

seq: EEHDIAYSKDGLPNVK-KYEEFR

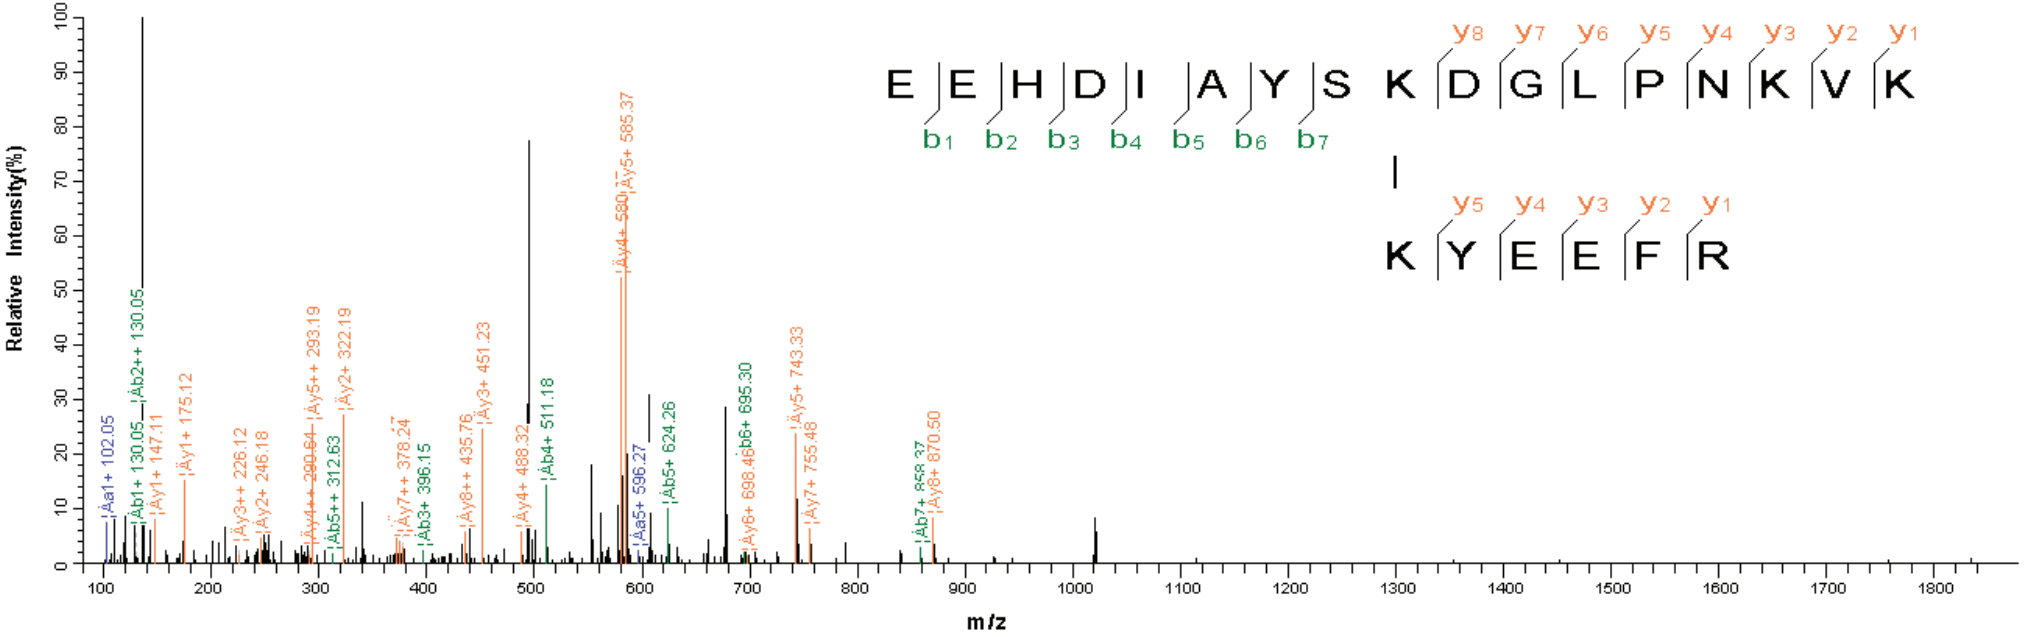

Seq: AQNFKSALANLEDIIFEIEKPLVVPVK-KTNK

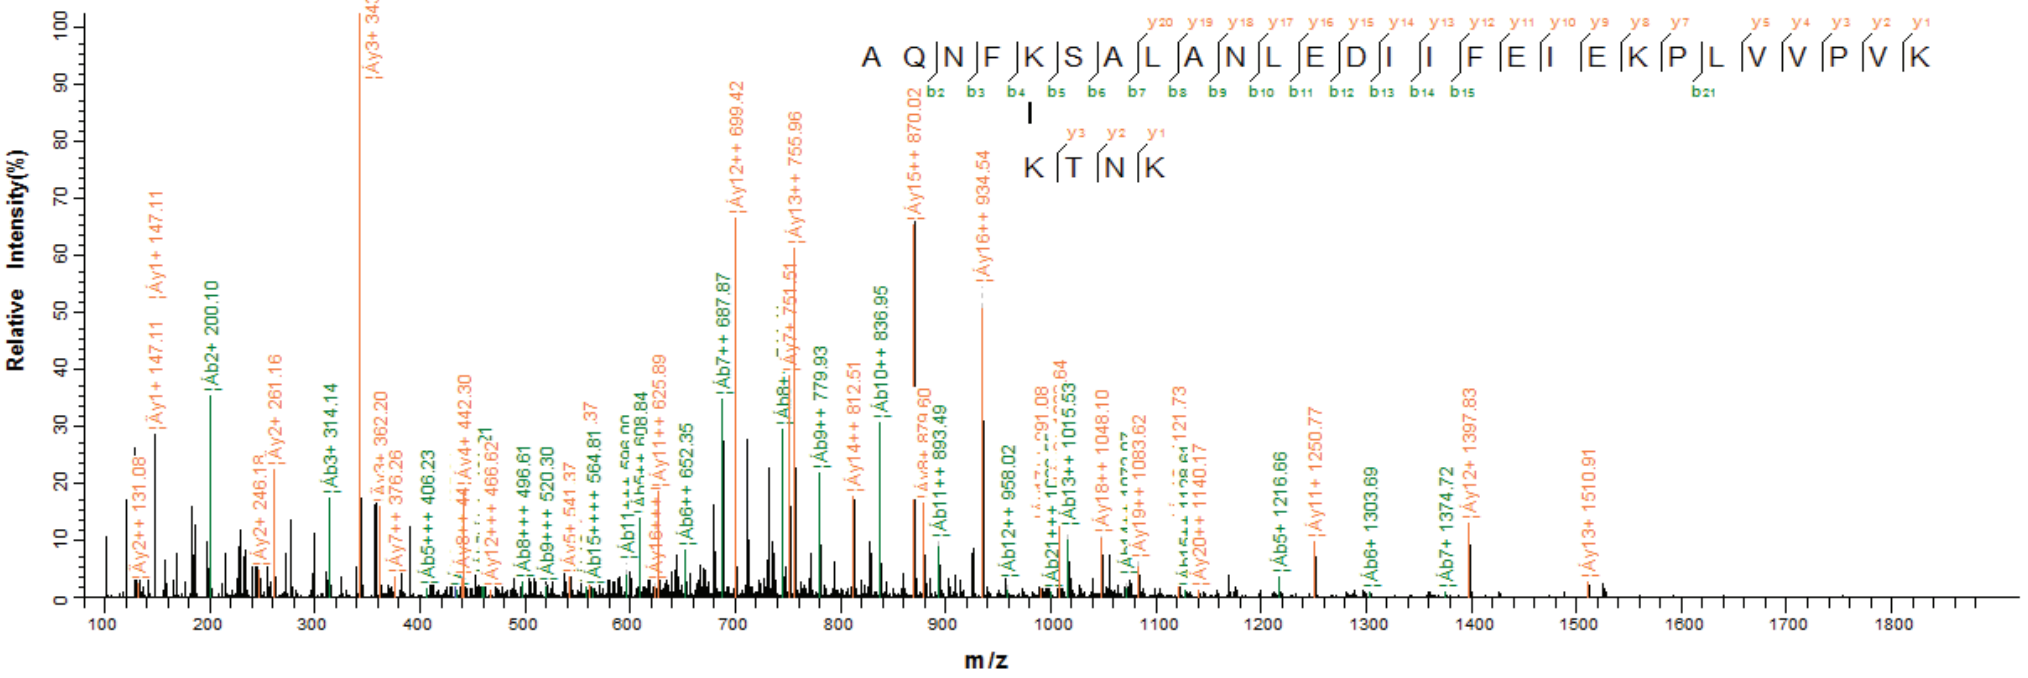

Seq: GVTEKDAVDYSK-KYEEFR

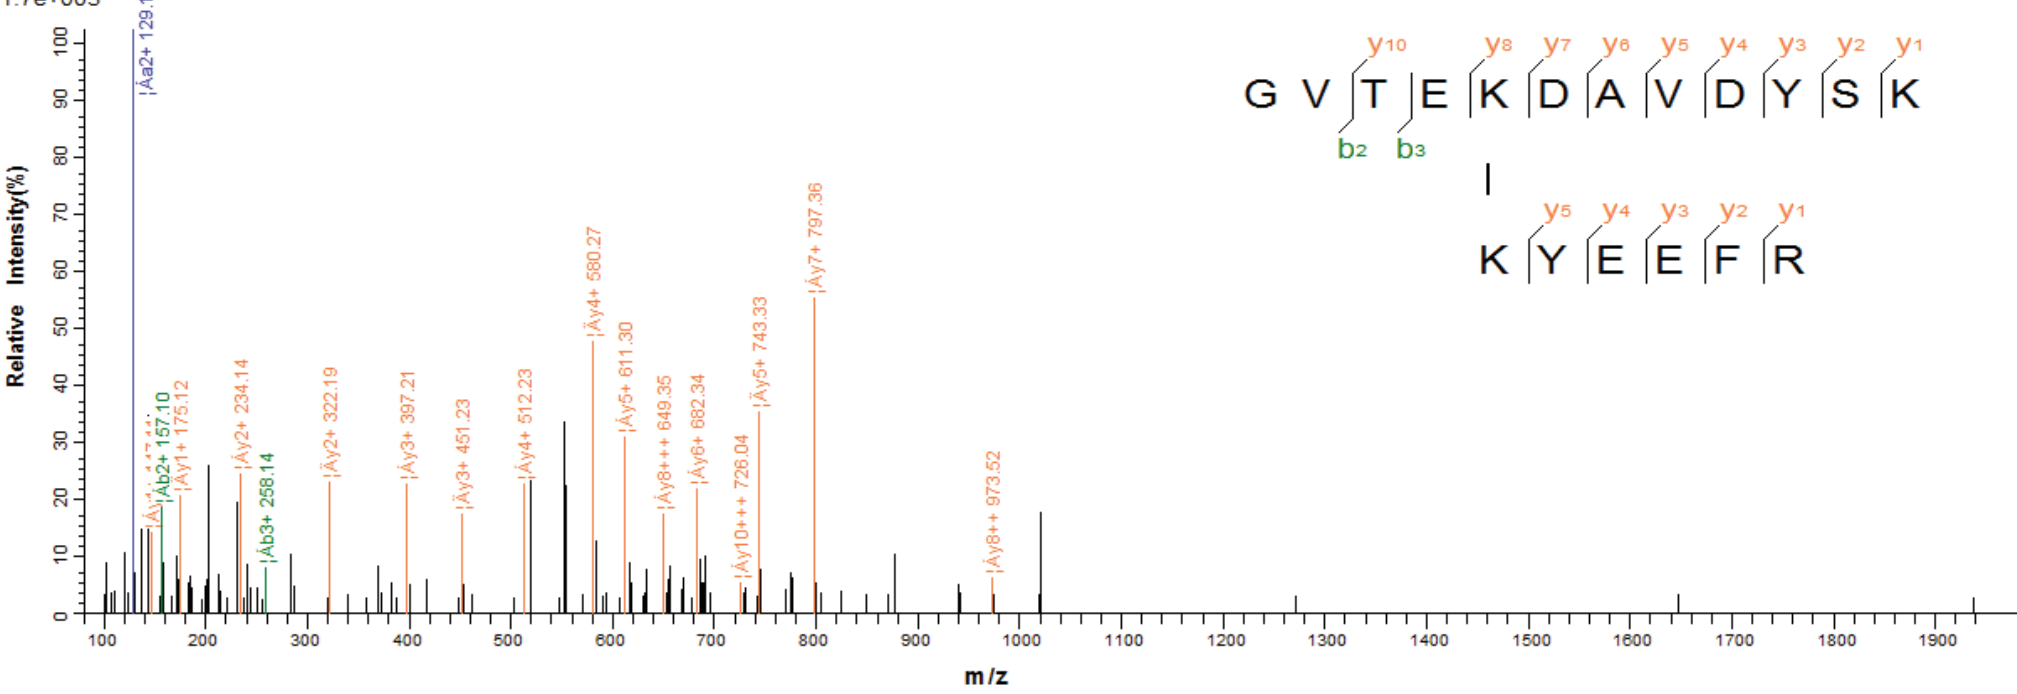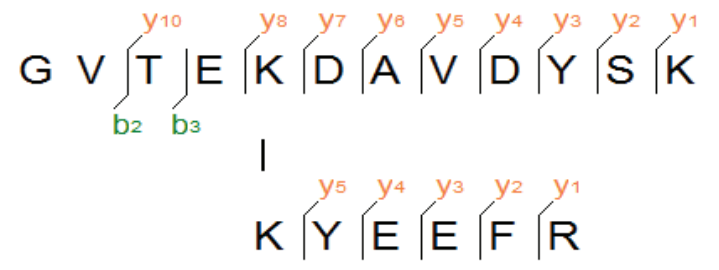

Seq: L S L L L V E D K I P L D R L E N V L A I G I A G A H R - A E L L D K R

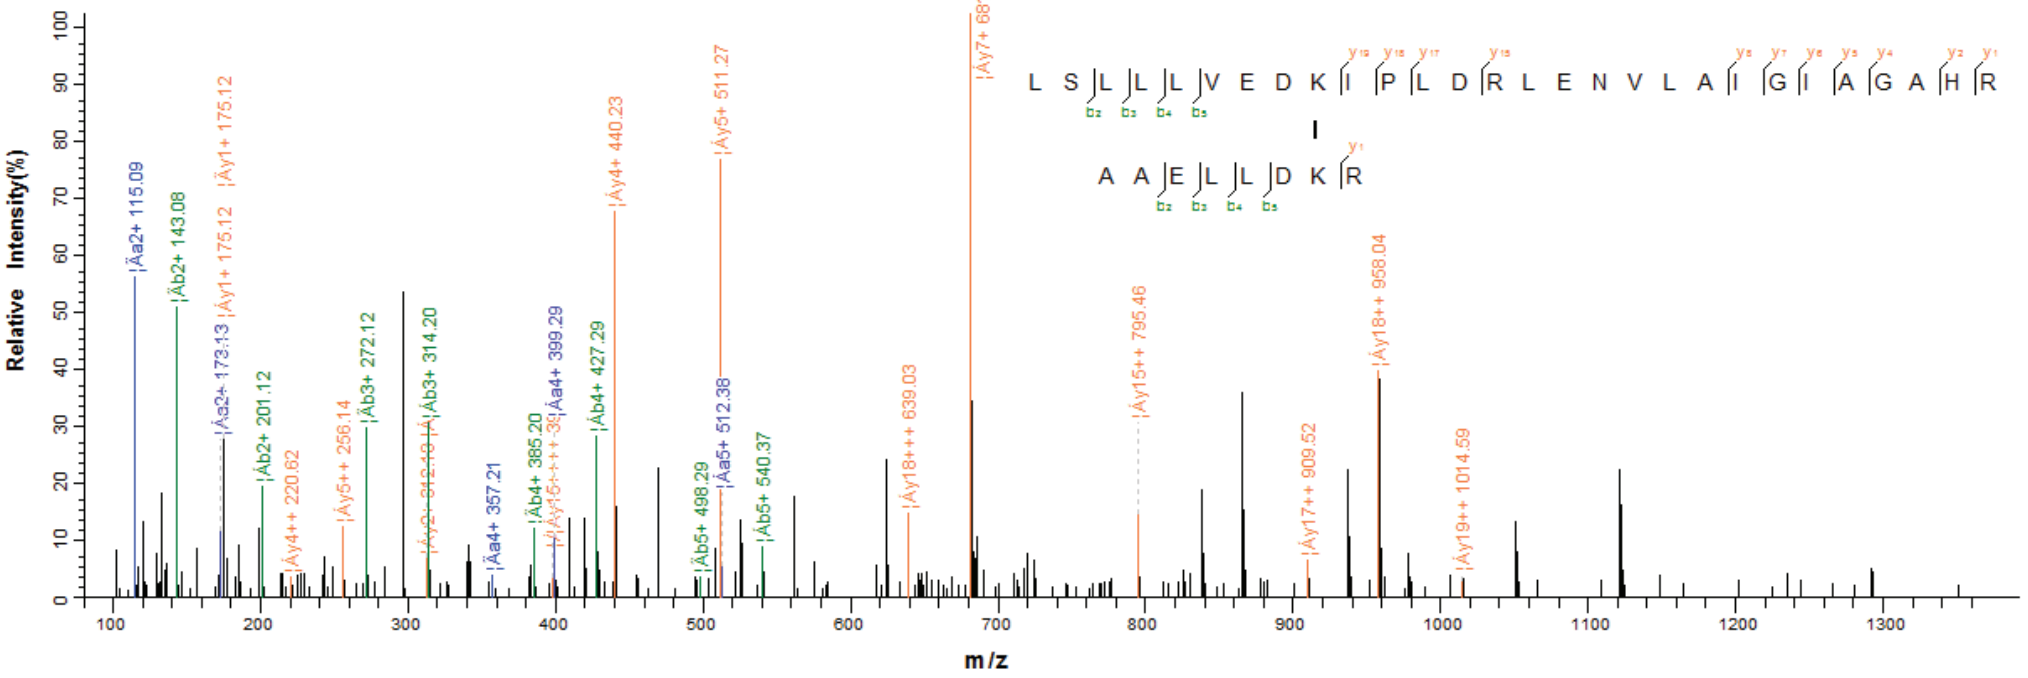

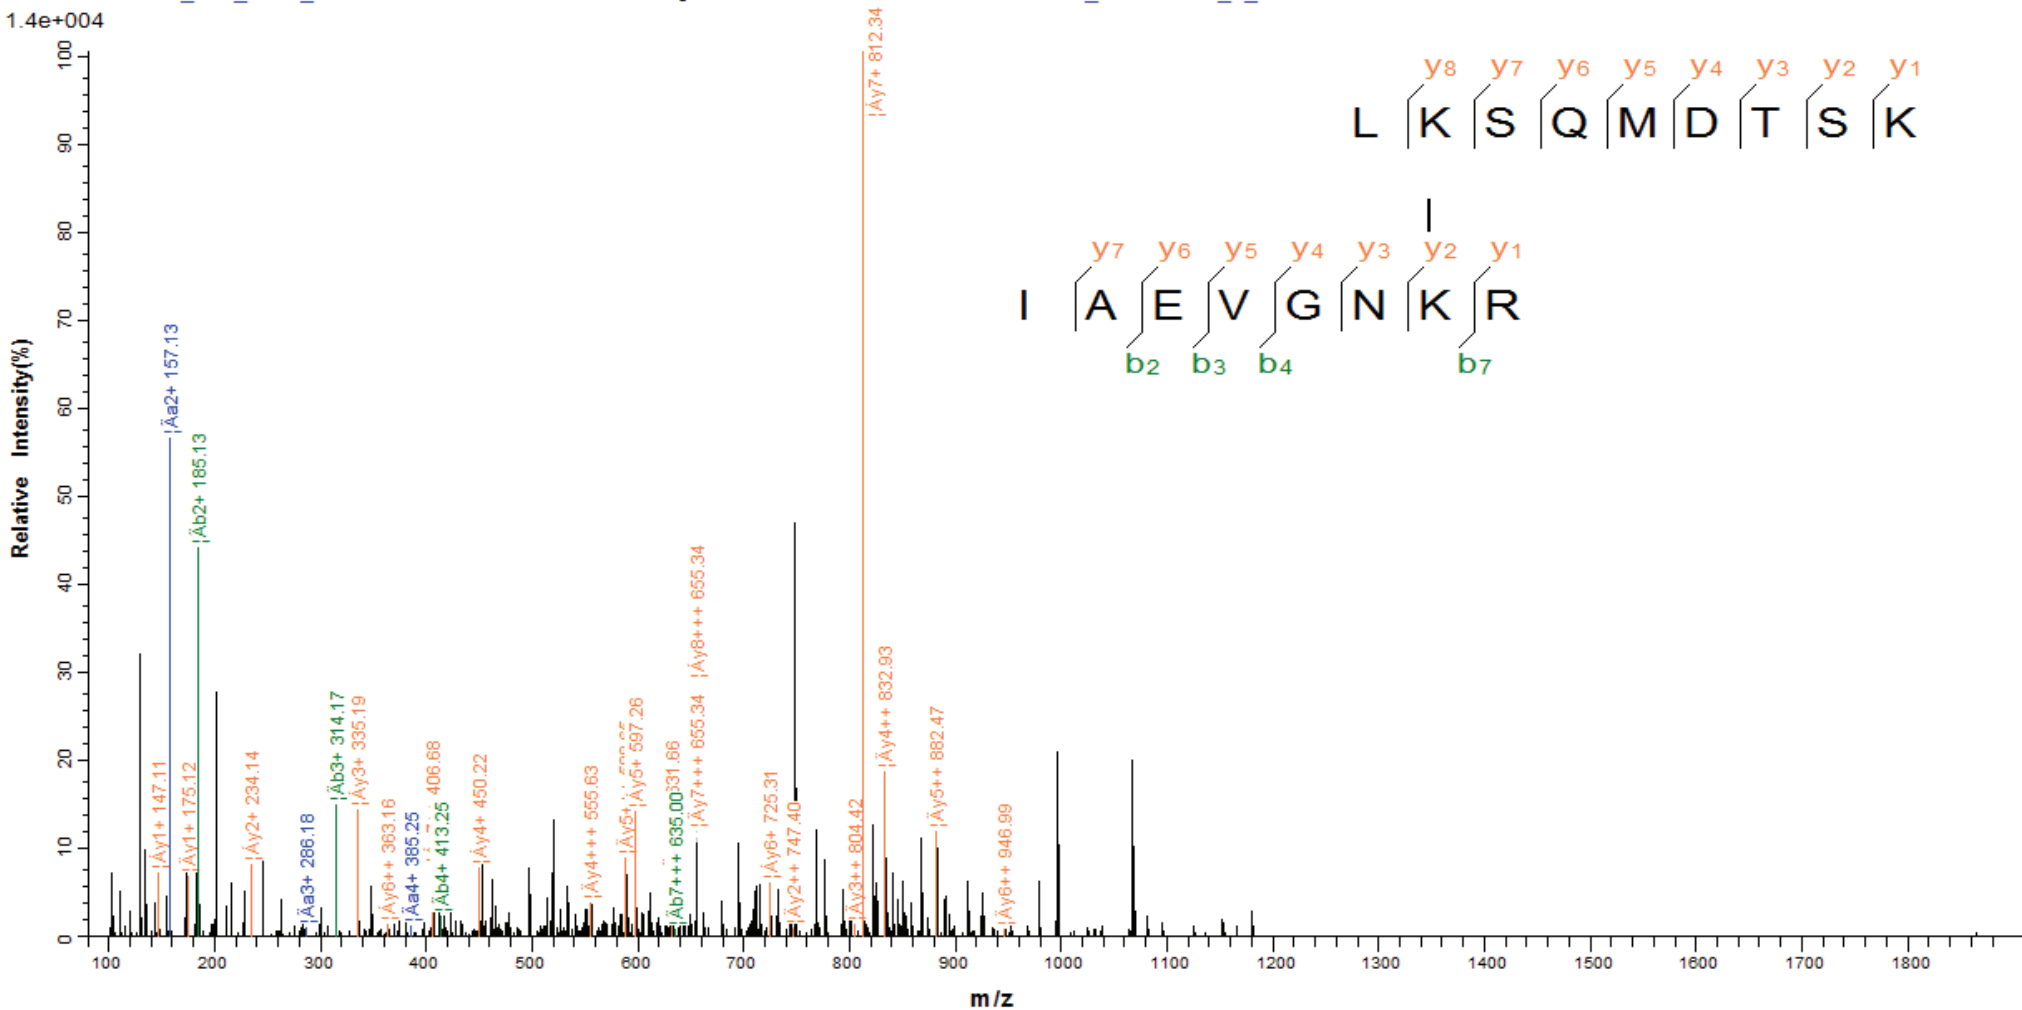



Exosome\_GFP\_test\_A9.001422.001422.4.dta Seq: LKSQMDTSK-IAEVGNKR

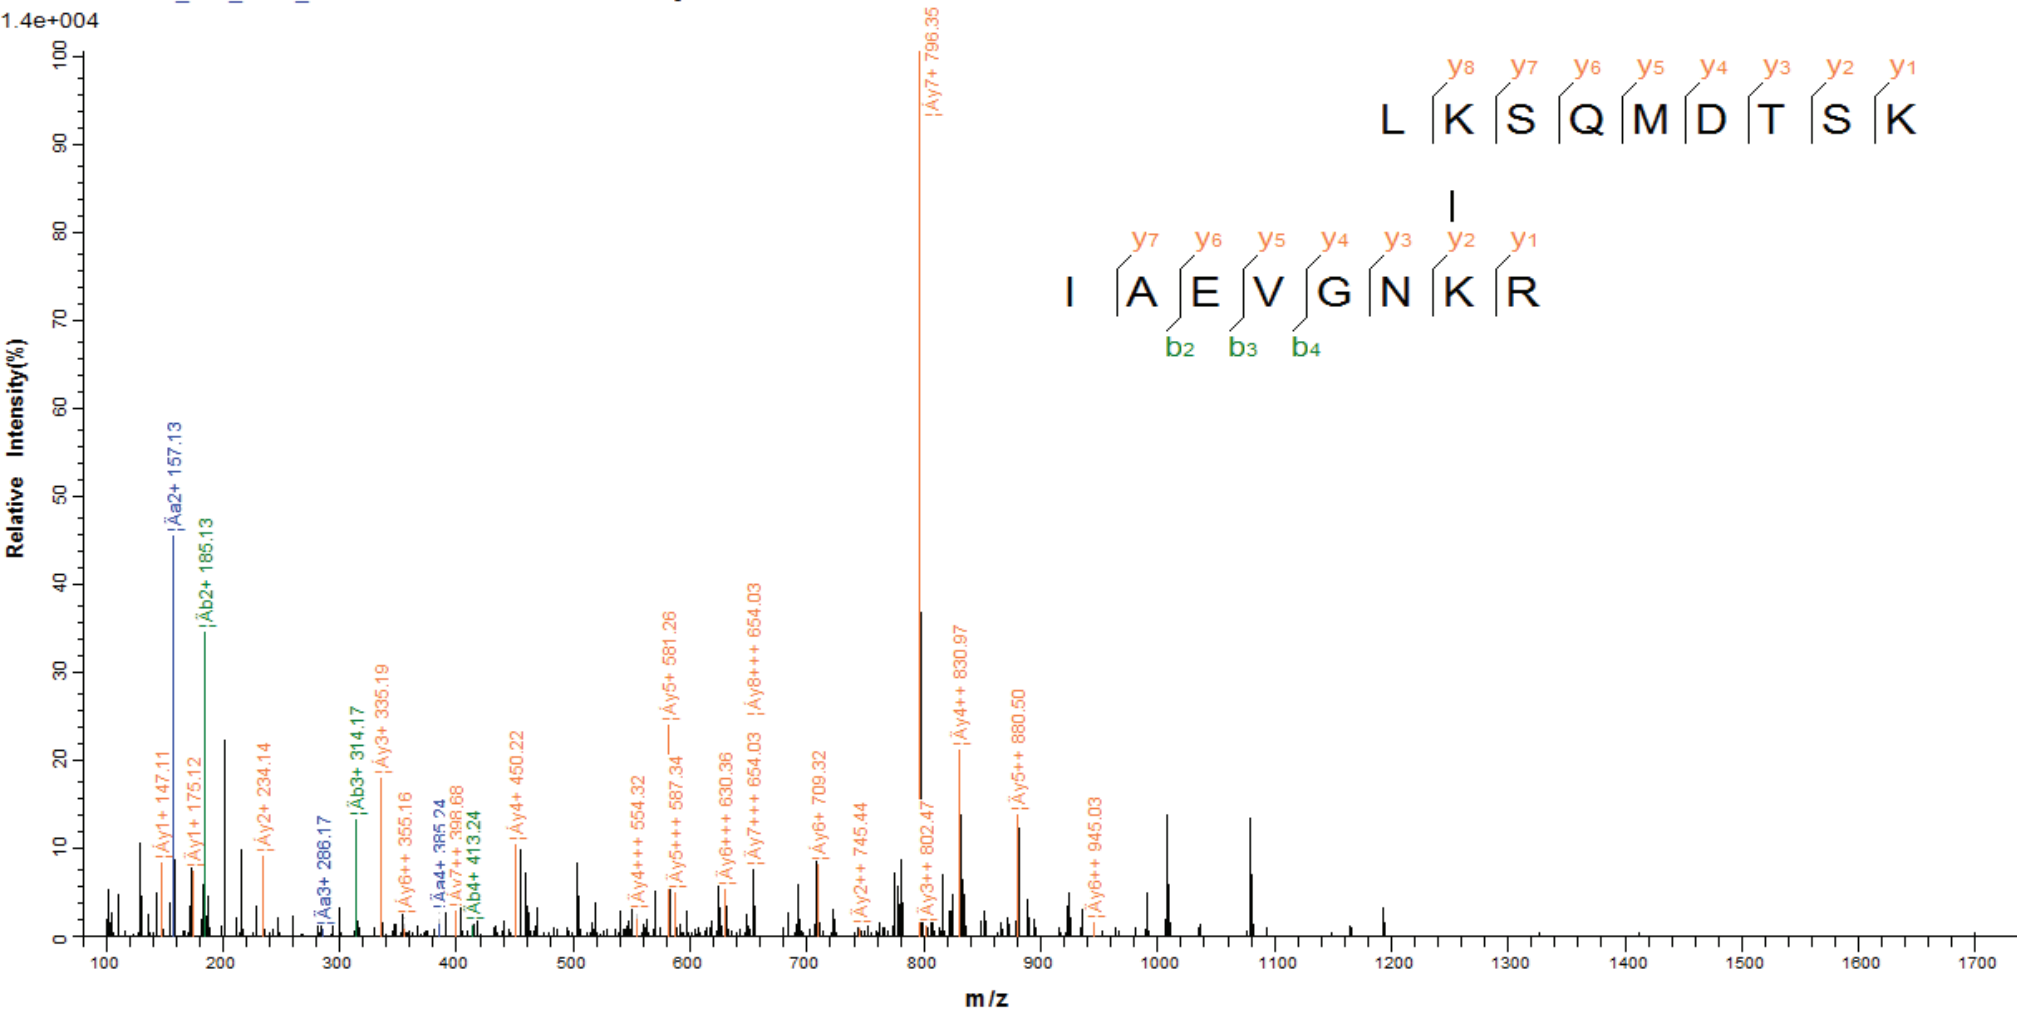

Seq: SSKNER-IIEKSVR

3.9e+003

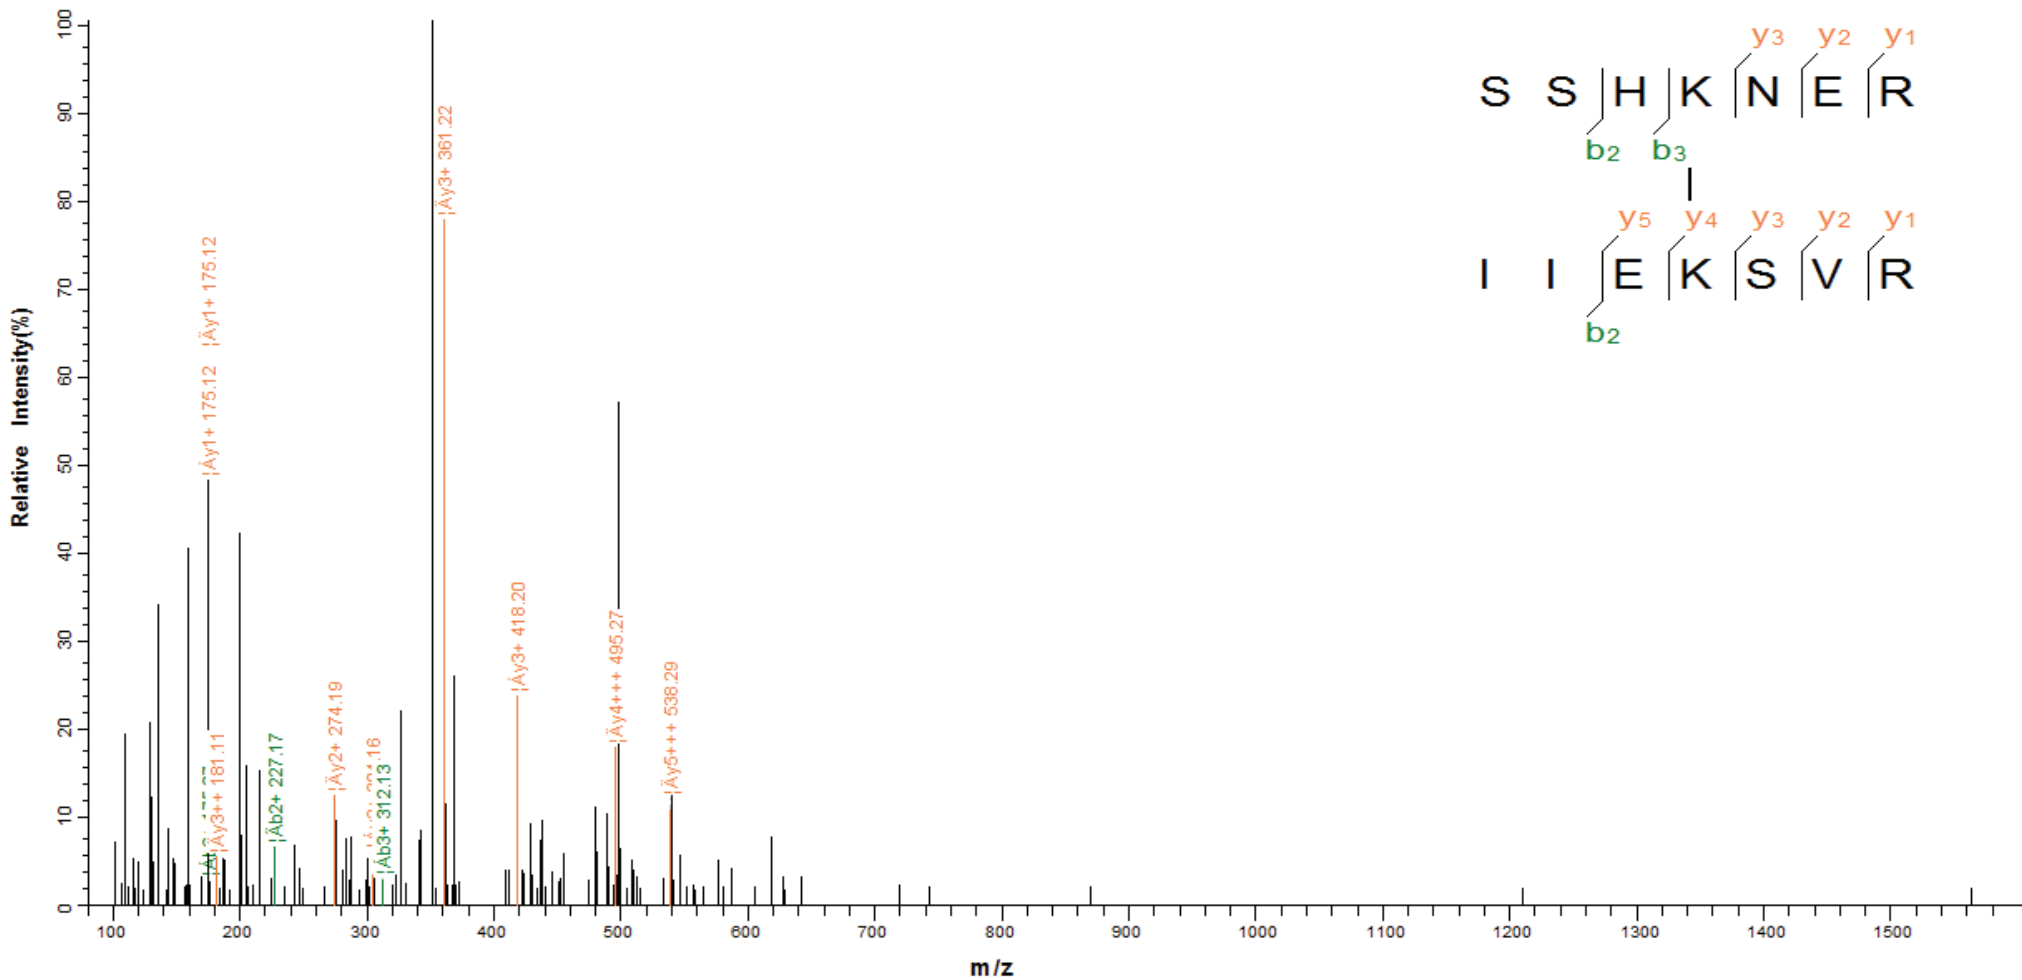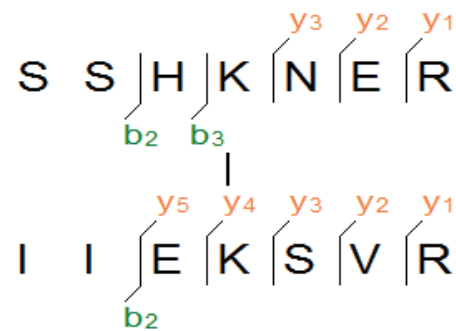

Seq: SVILDSKENELPTR-KTSQMDLAR Mod: 23, Oxidation\_M\_15.995

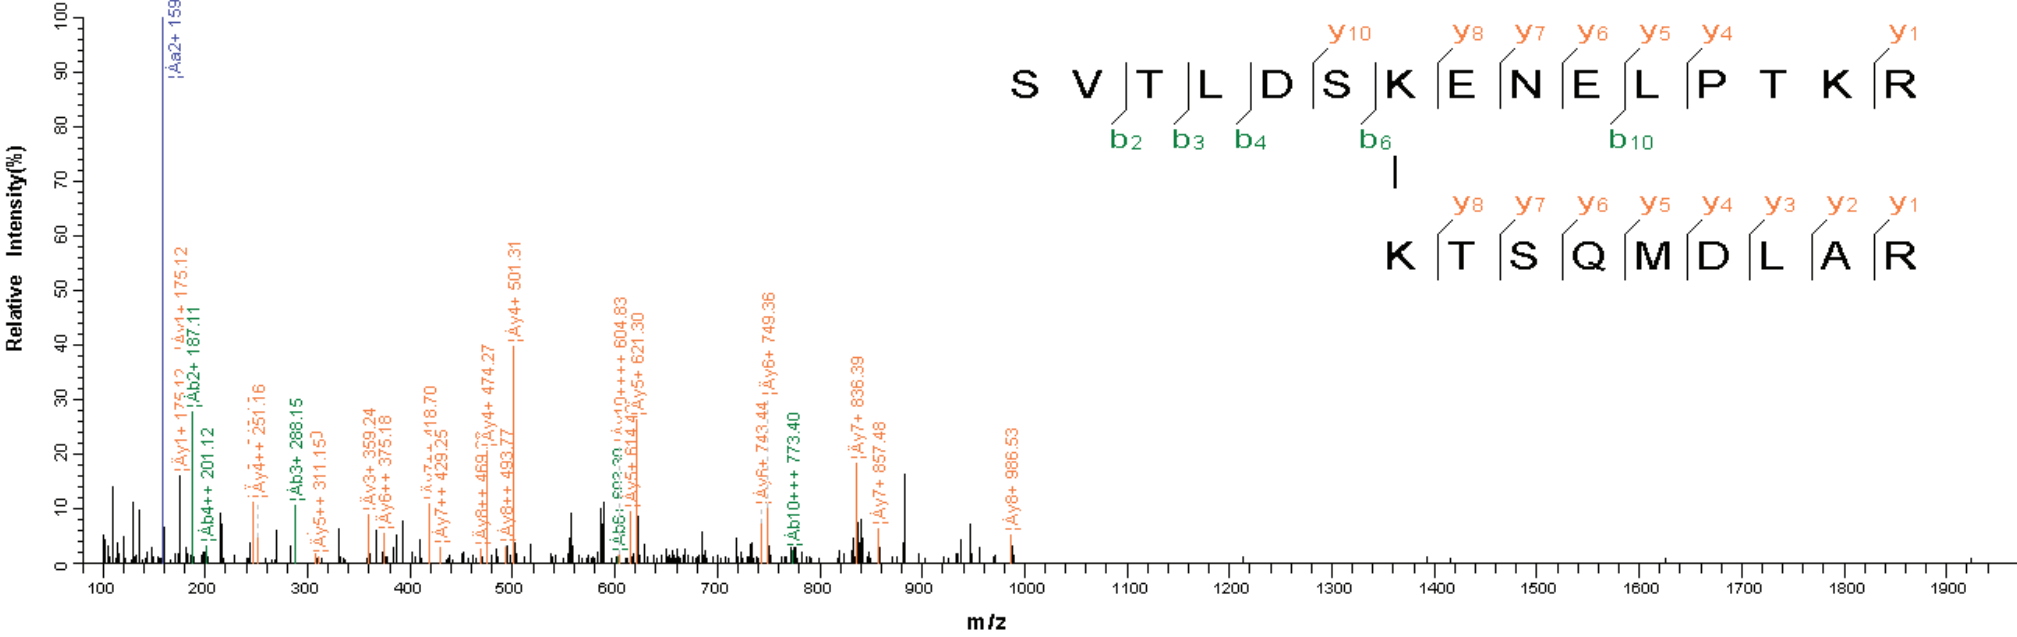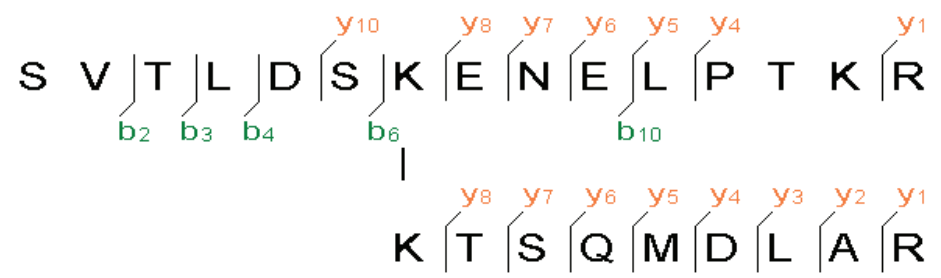

7.7e+003 Exosome\_GFP\_test\_A9.002914.002914.4.dta Seq: NLSLSTSIPLSSQNSSFLSLKK-KTK

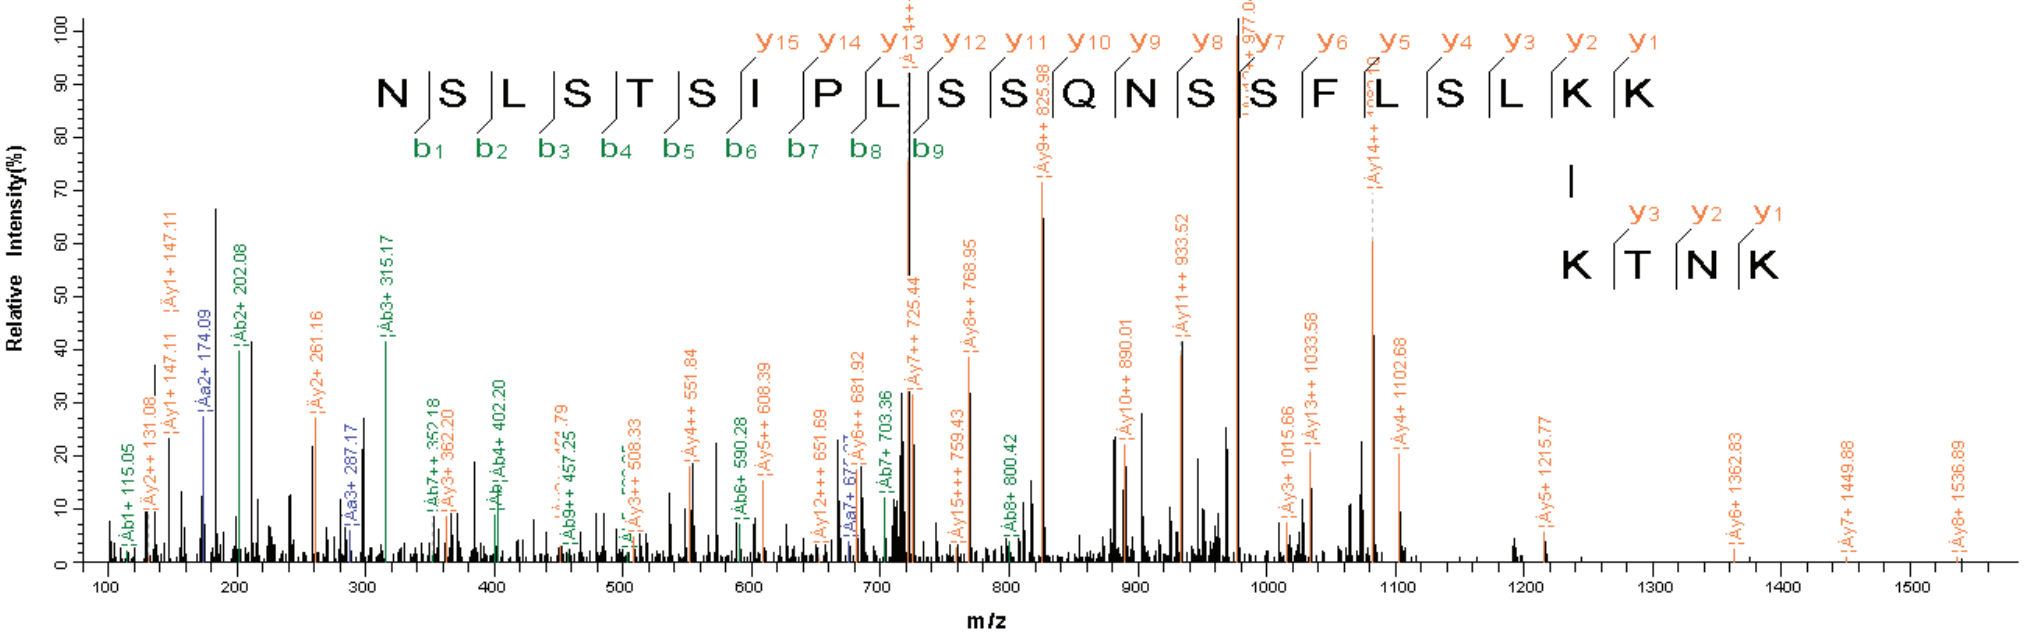

exosome\_A8\_1.007424.007424.4.dta Seq: NSLSTSIPLSSQNSSFLSLKK-KYEEFR

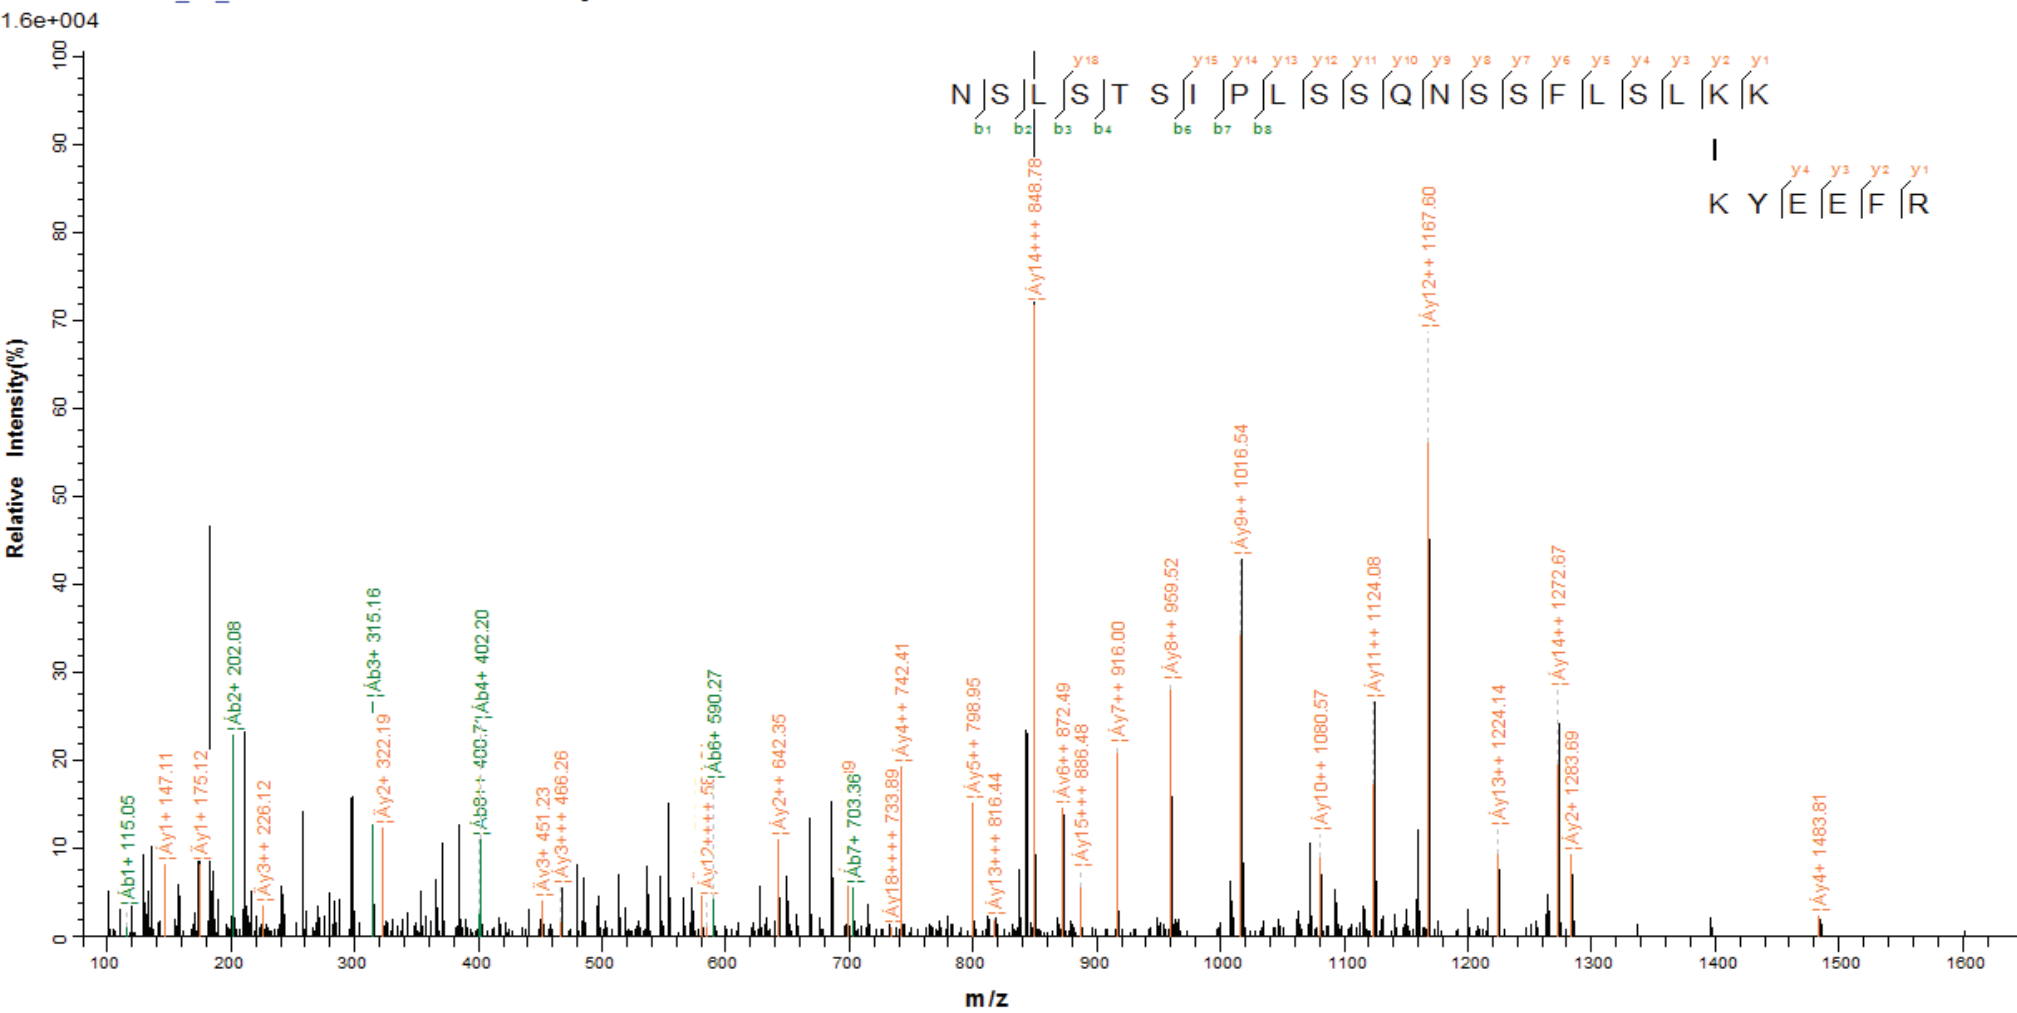

Seq: KHNNELGIFVPCNLPK-KYEEFR Mod: 13,C\_57

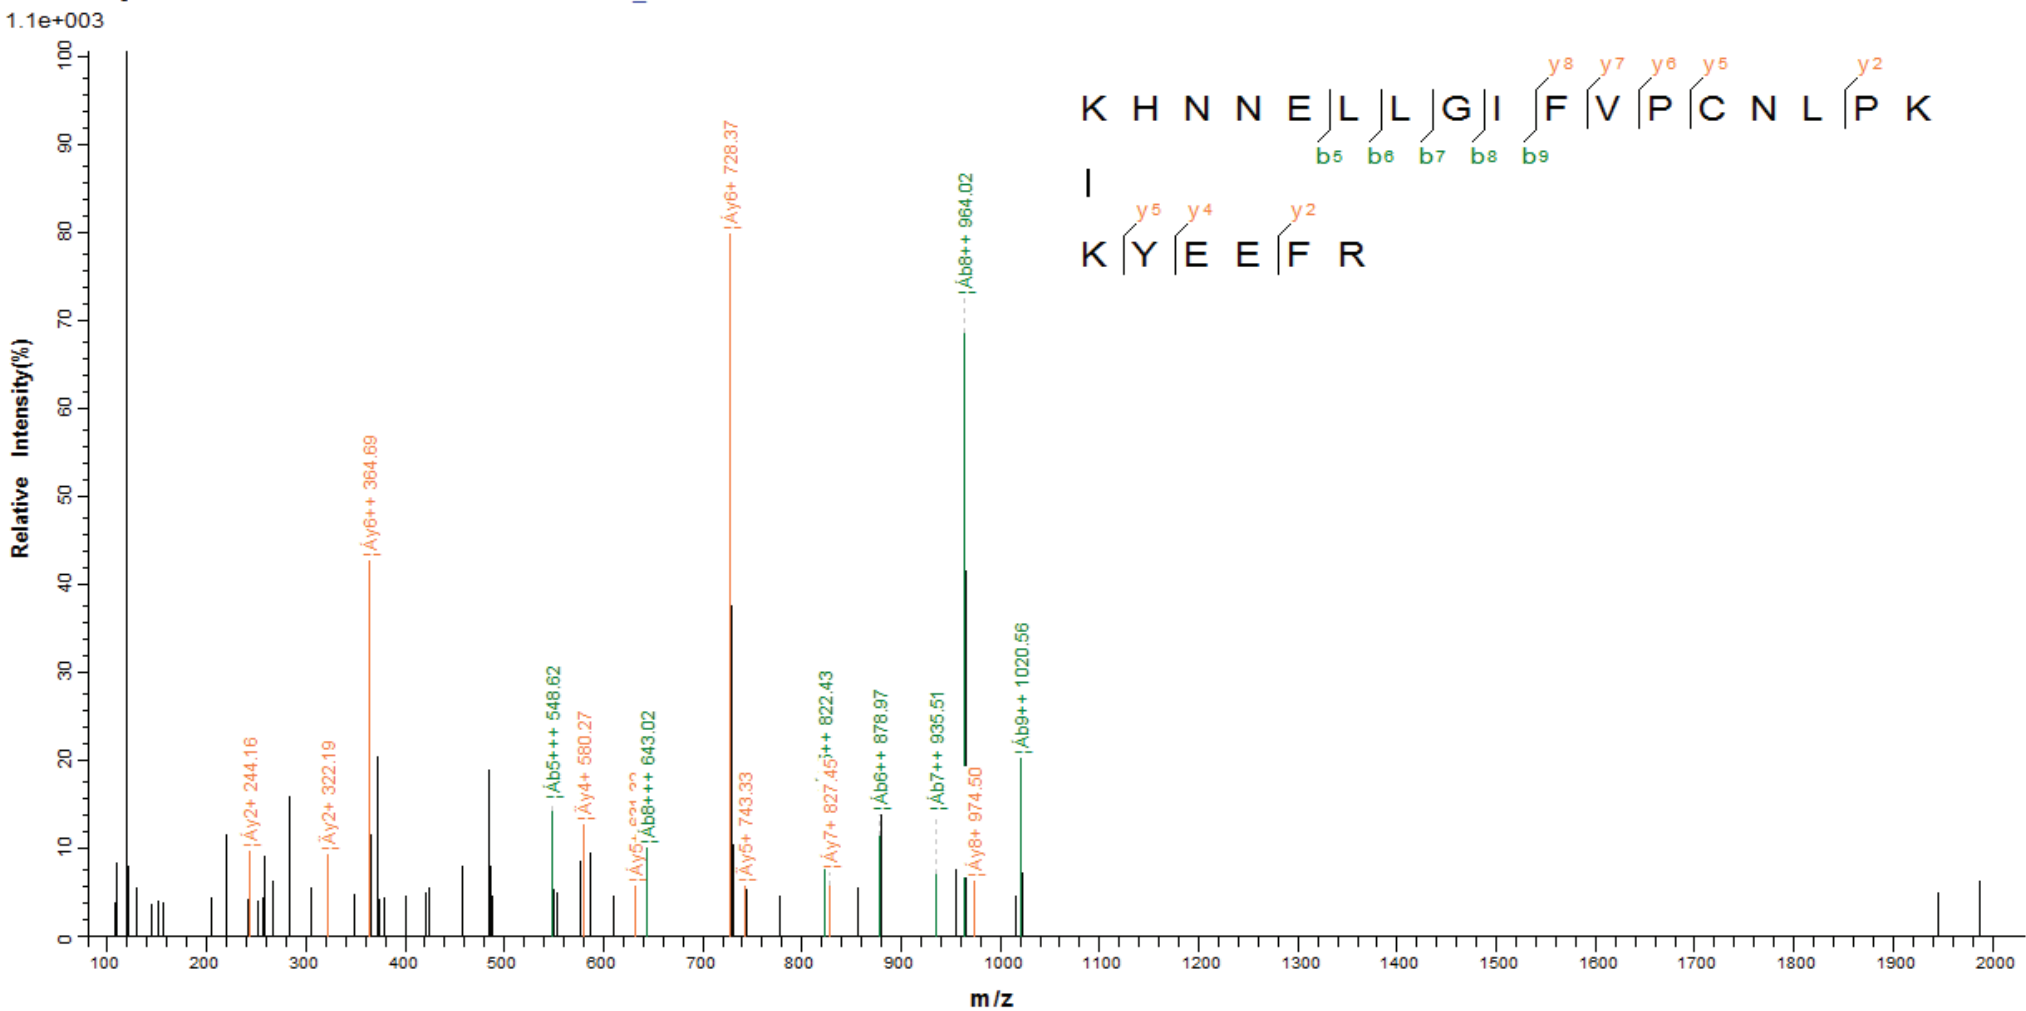

exosome\_A8\_1.004788.004788.4.dta Seq: LENLNIKSVPK-IAEVGNKR

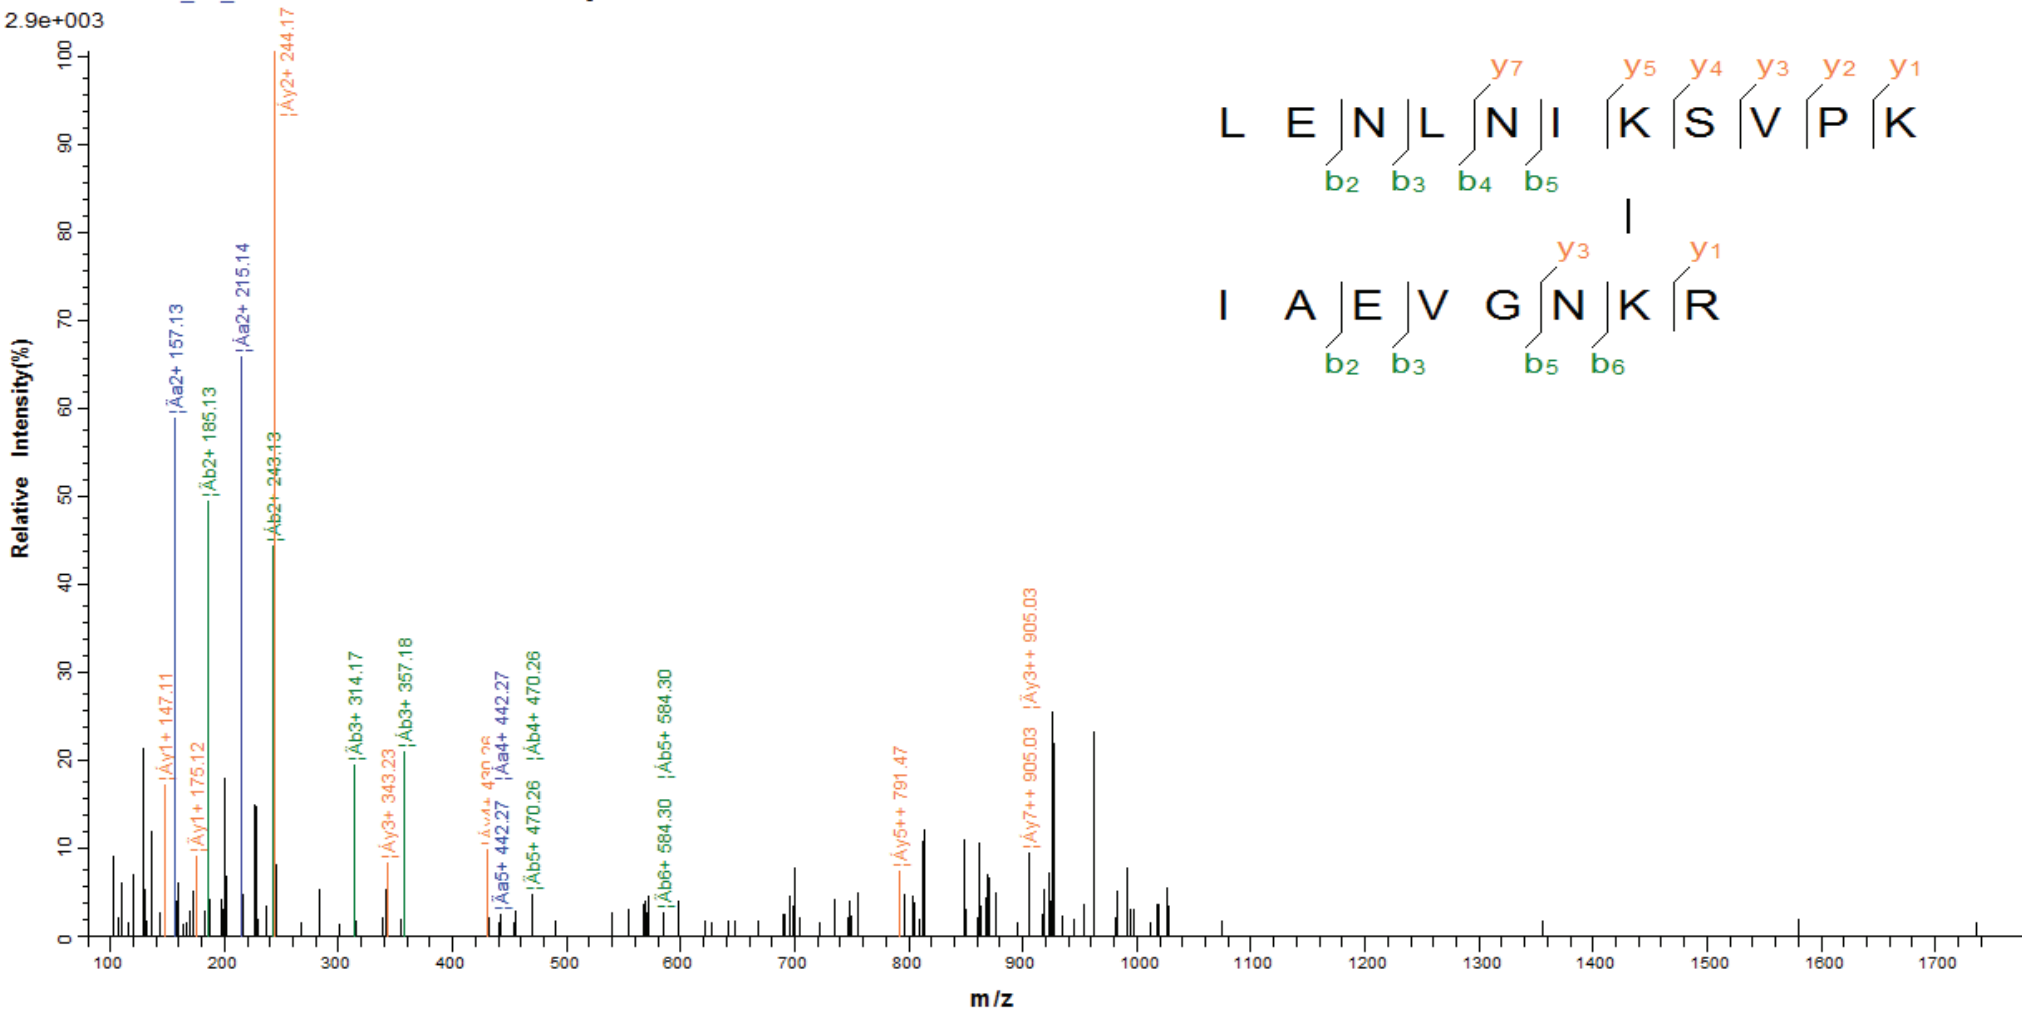

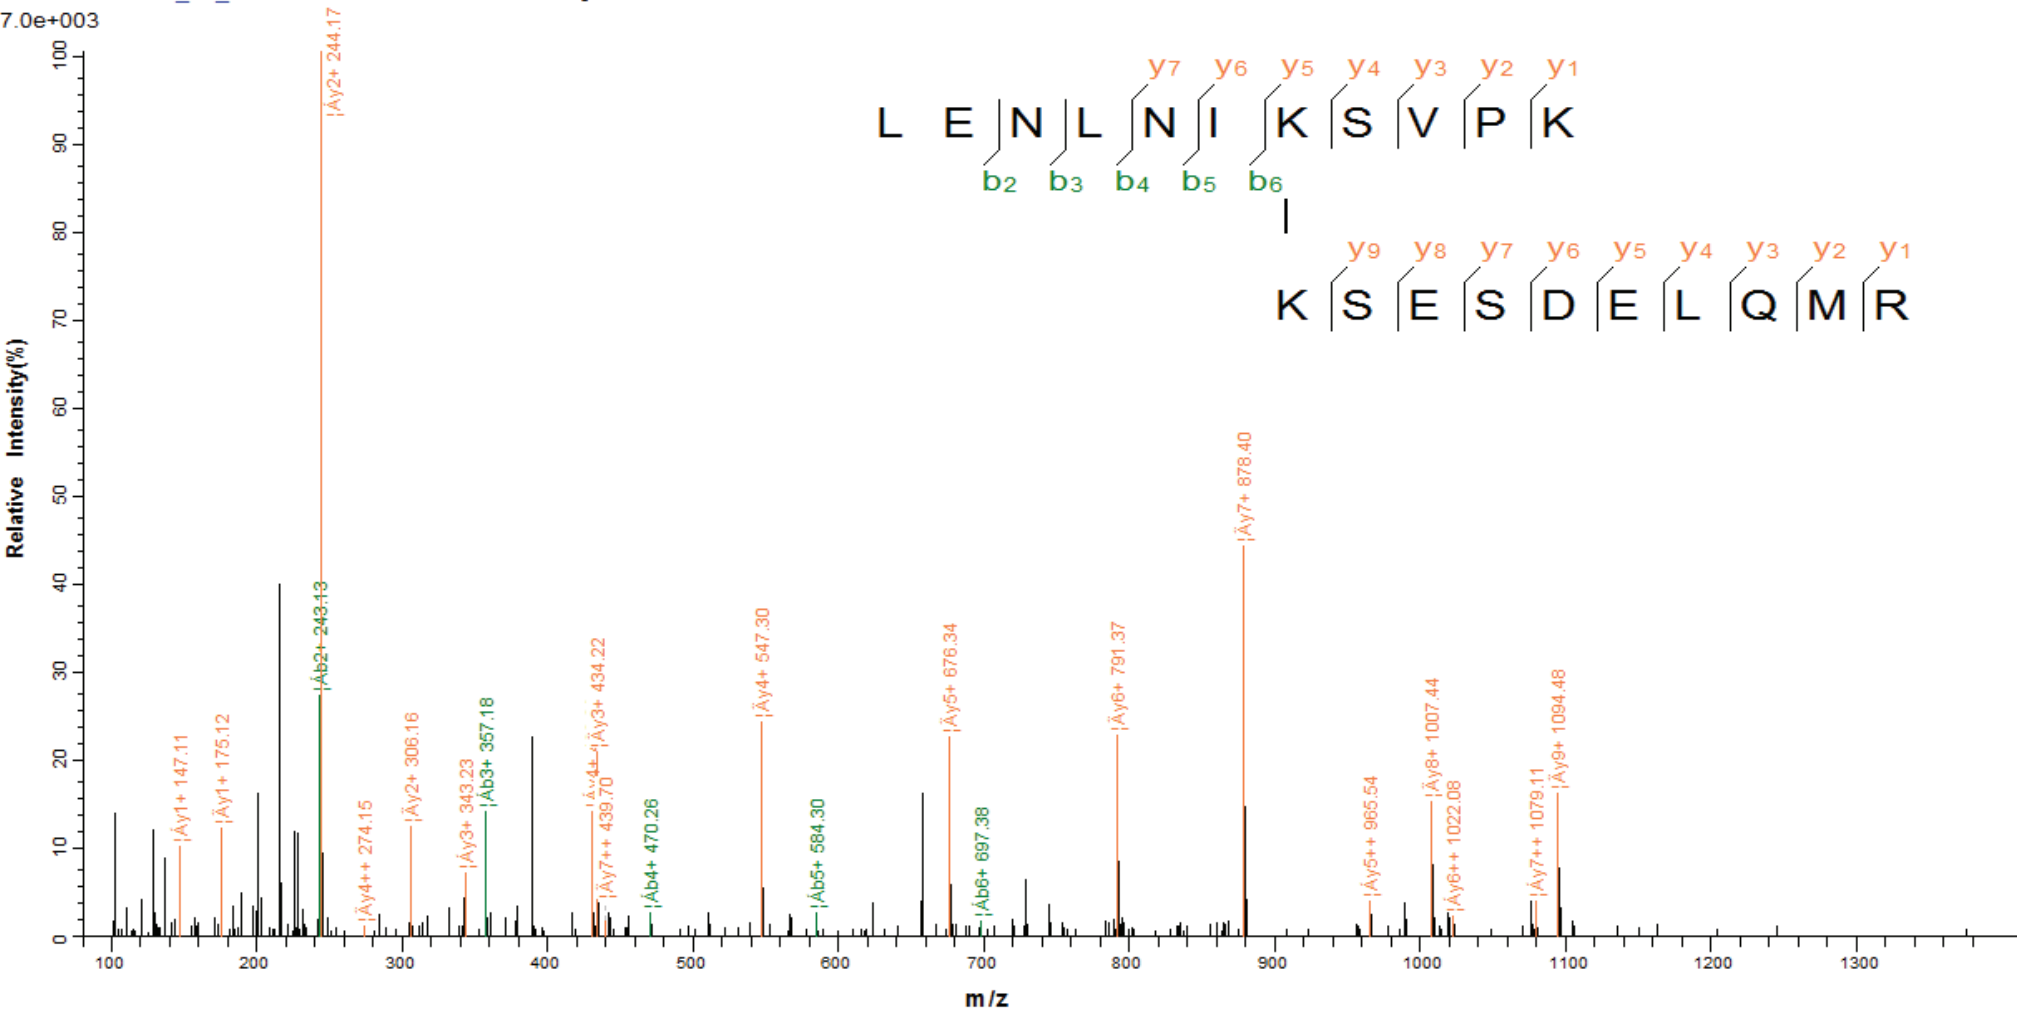



exosome\_A8\_1.004063.004063.4.dta Seq: KSSNLDPSSNSFK-KSEDELQMR

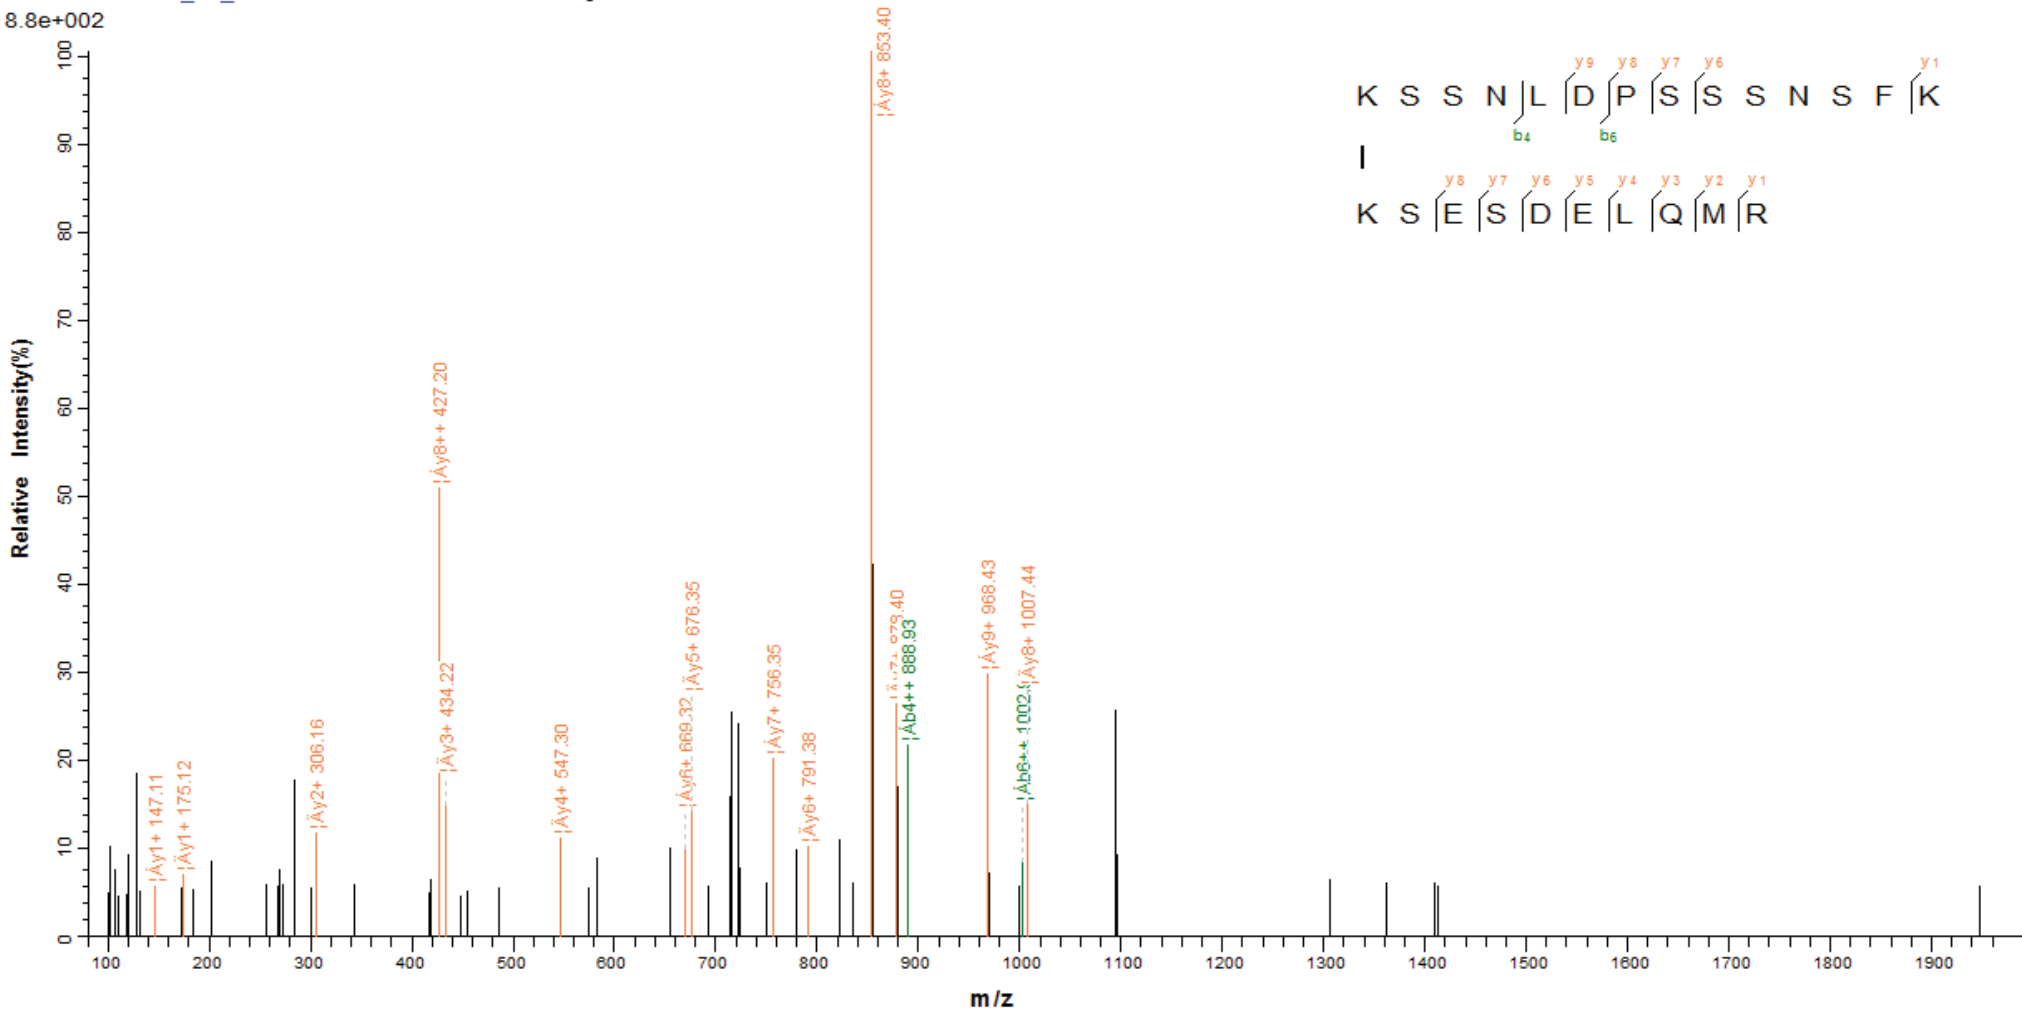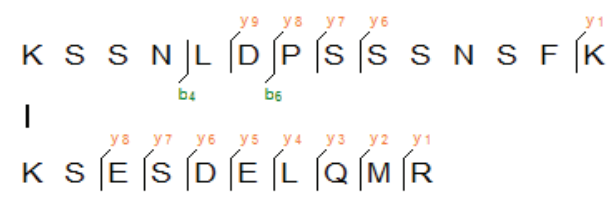

Seq: VILDNTRKTER-SLKYGK

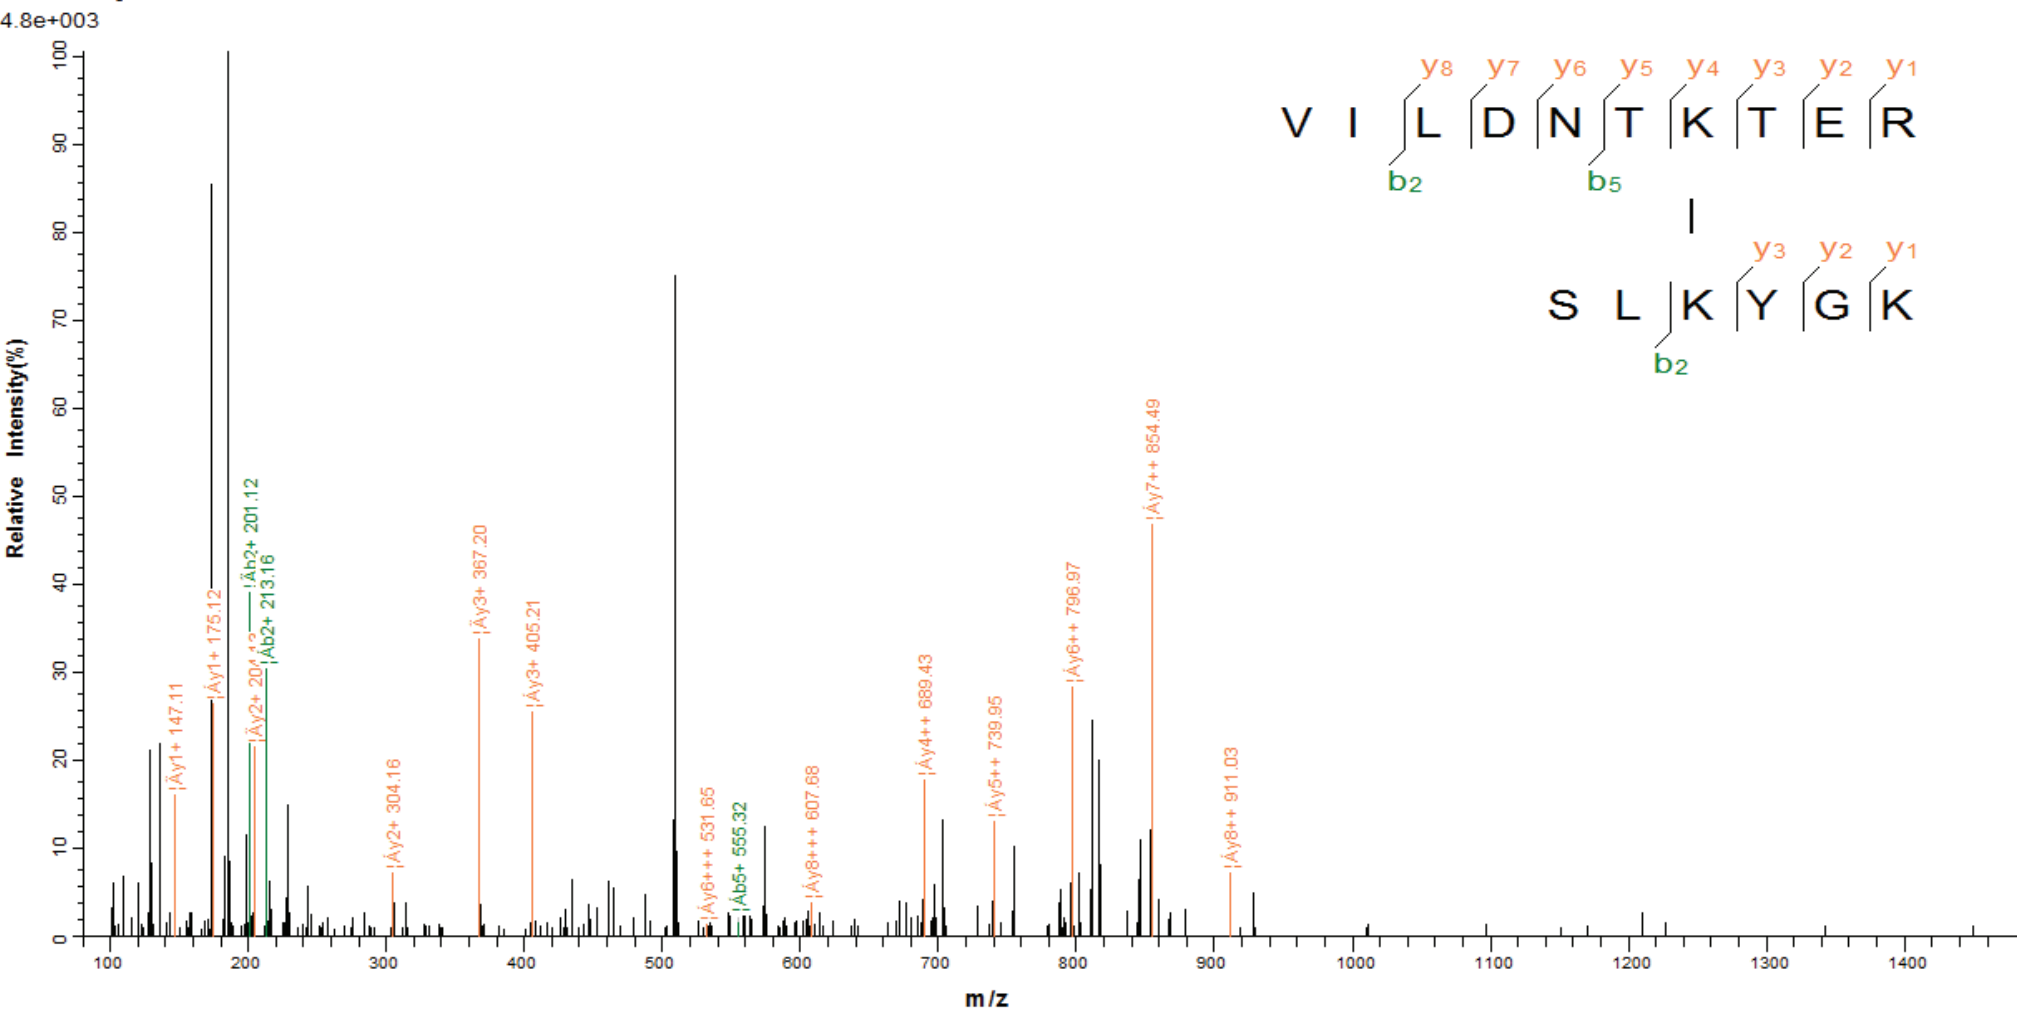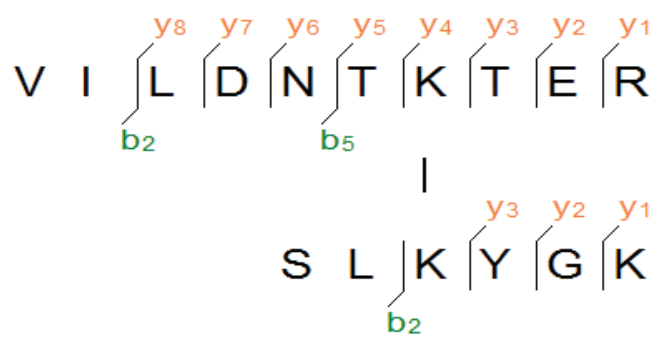

6.1e+002 exosome\_A9\_140503145423.2325.2325.4.dta Seq: SNSDLEKQGK-KTSQMDLAR

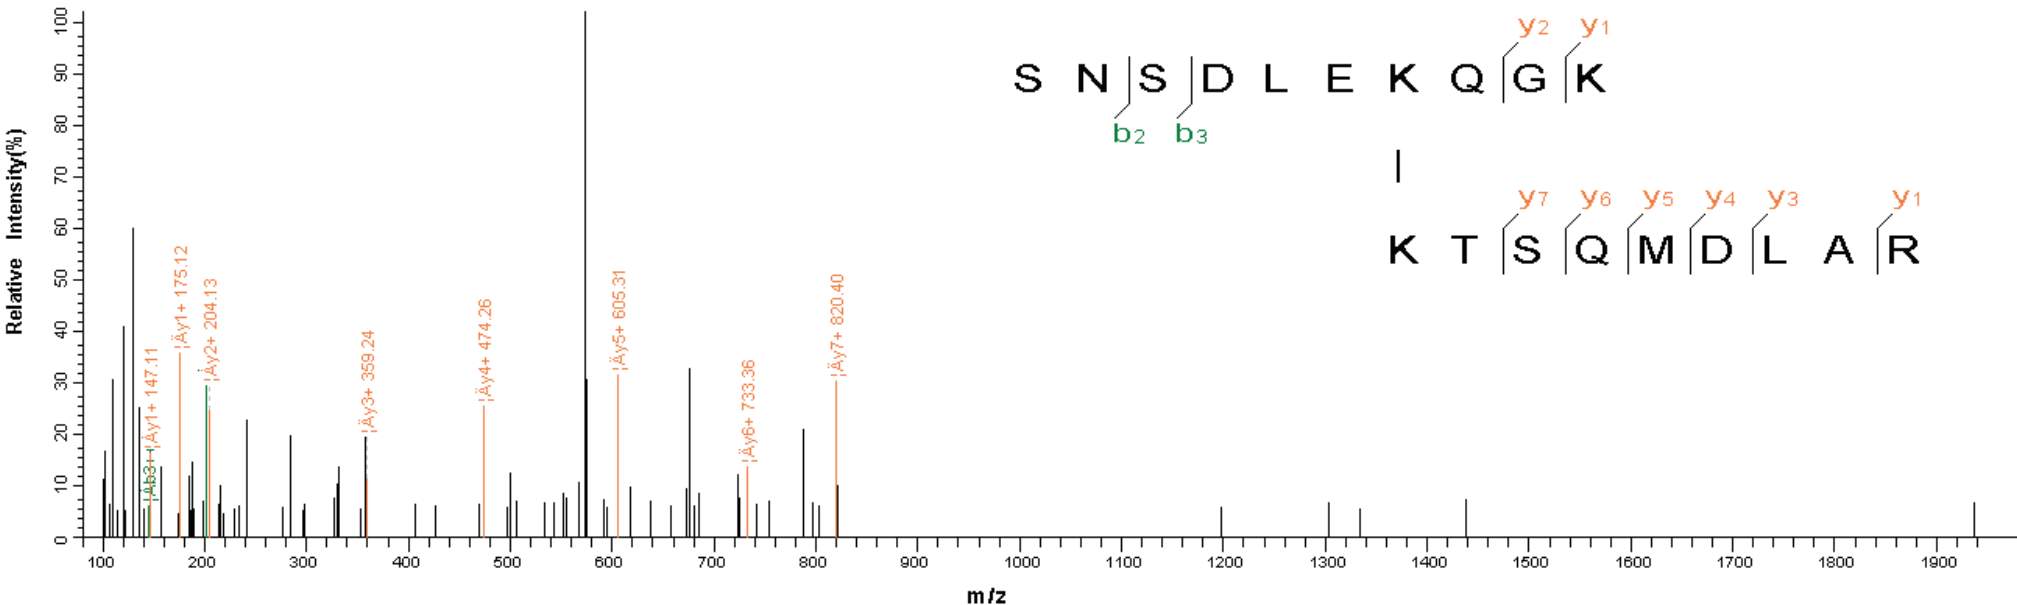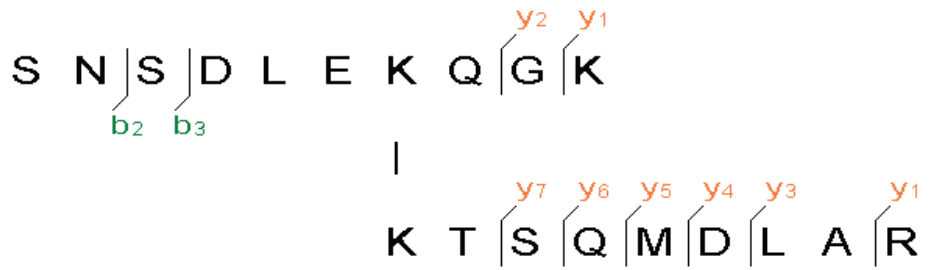

Seq: QGKSVTLDSK-KTSQMDLAR

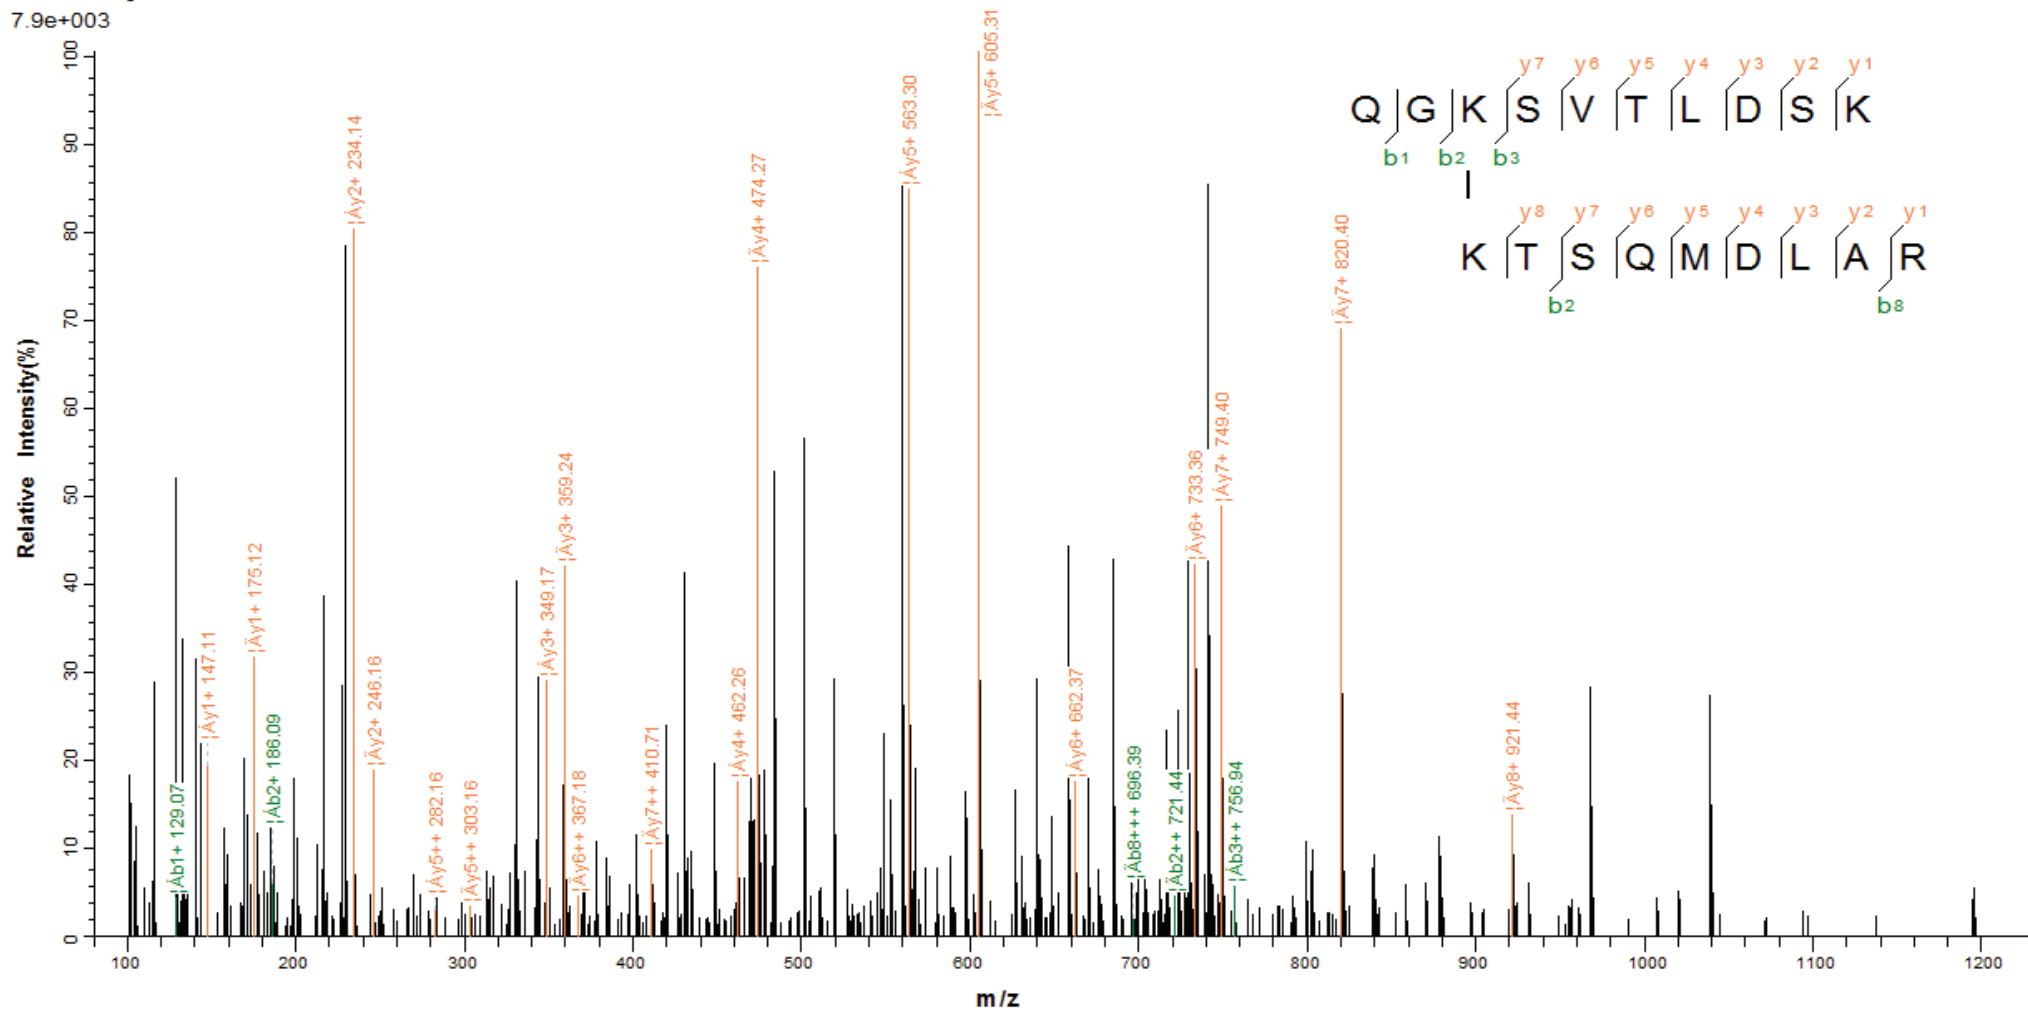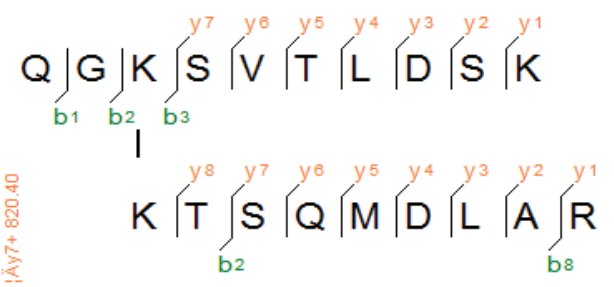

2.5e+004 <sup>R</sup>oxosome\_GFP\_test\_A9.002374.002374.4.dta Seq: NILVSVLPGTERGR-KTNK

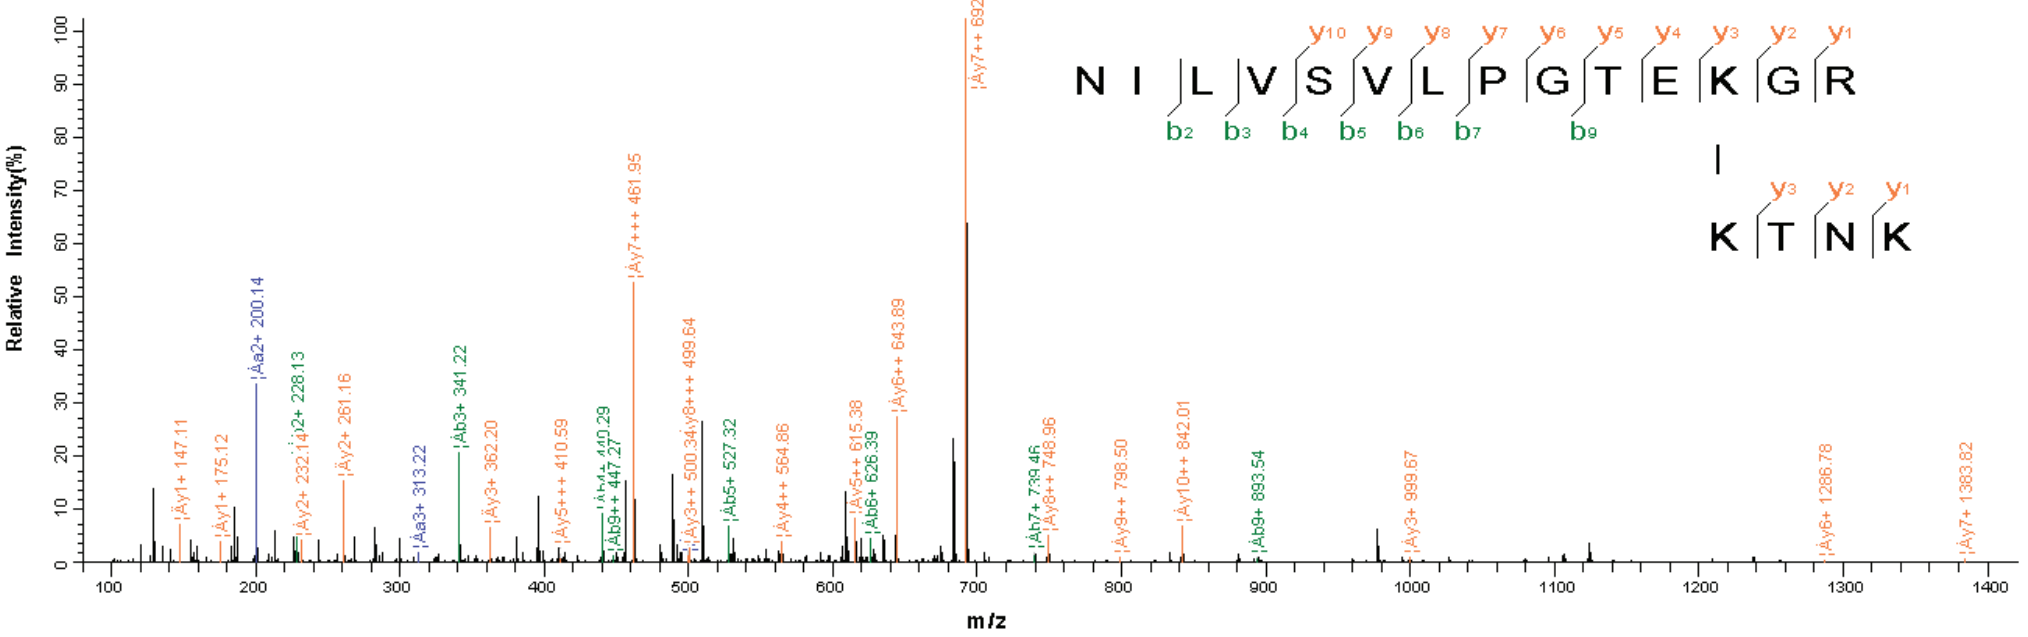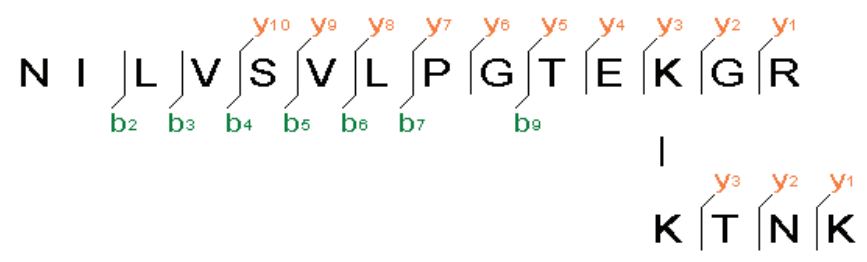

Seq: AANGAGGLMYATDWQMMTSPVTGATEKR-VKVICFKPGDIVR Mod: 37,C\_57

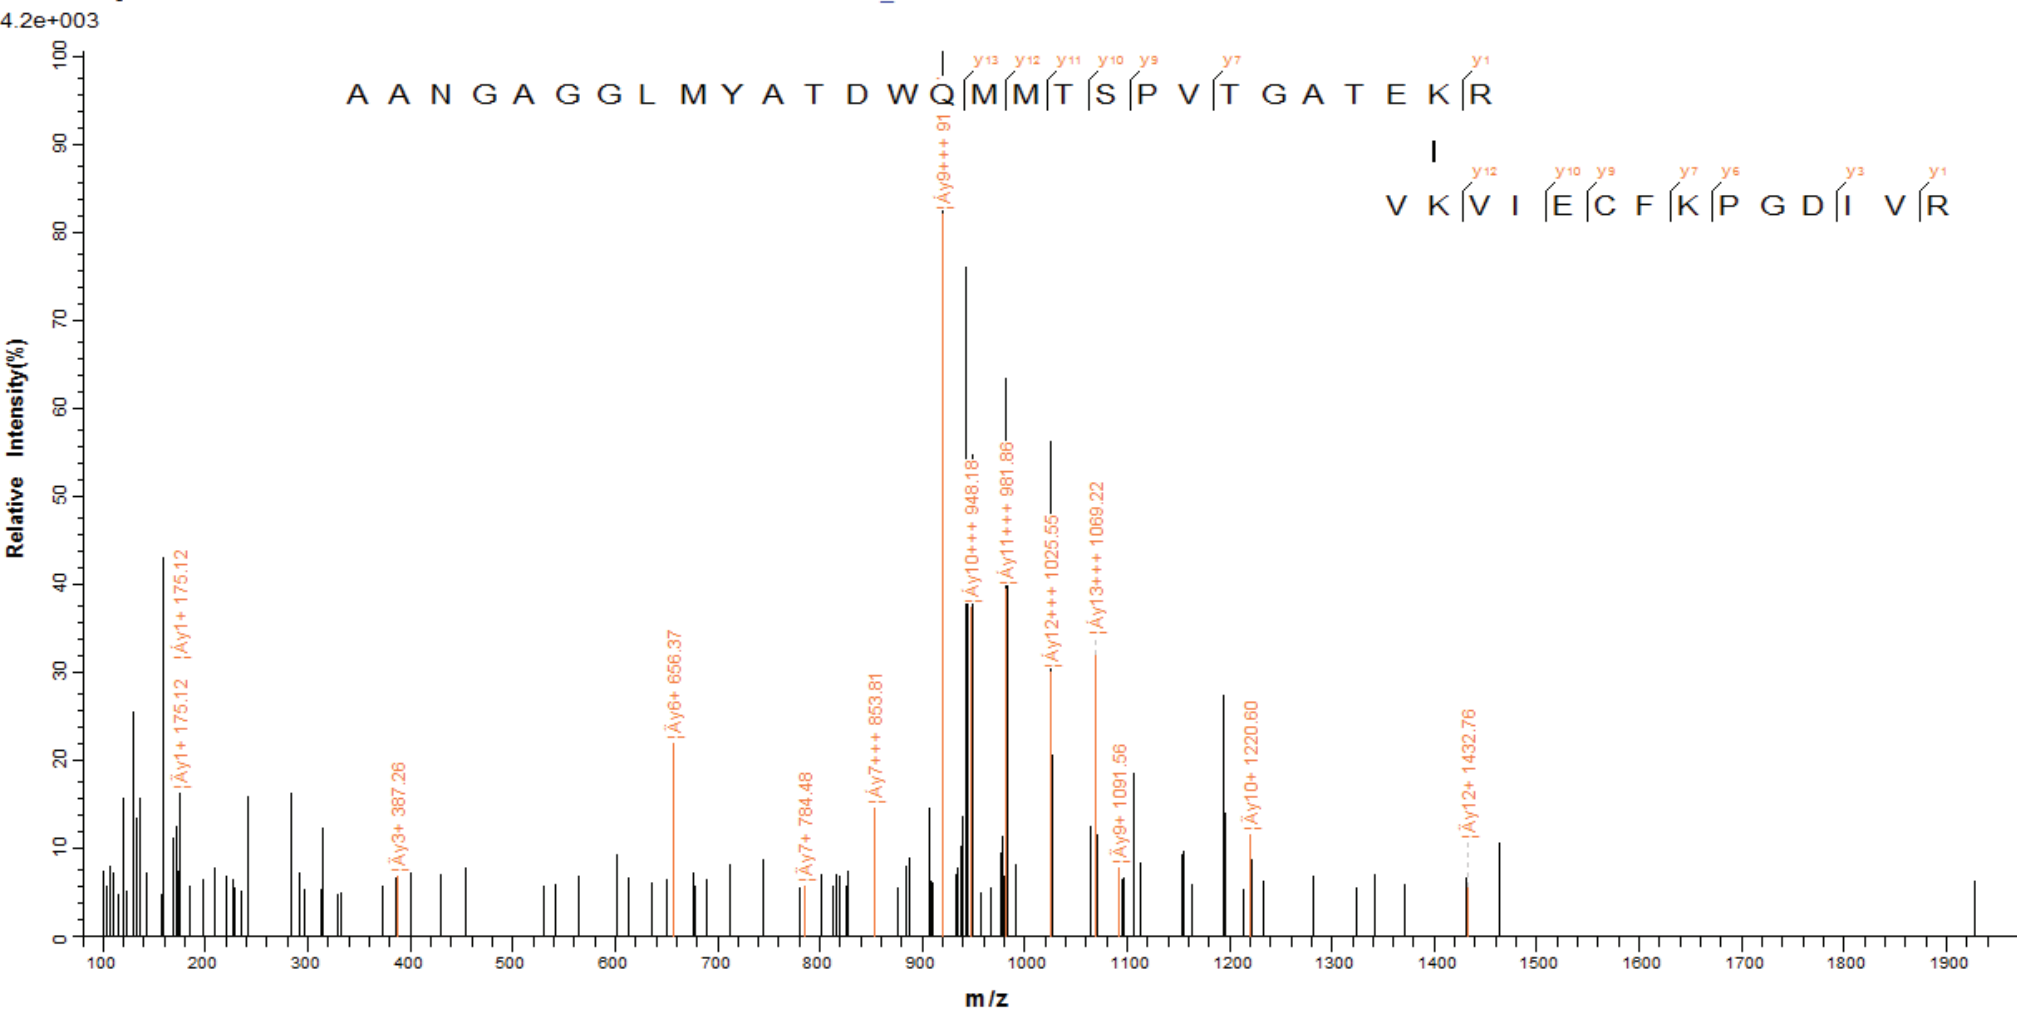

exosome\_A9\_140503145423.2290.2290.4.dta Seq: EGTDQSTEEEEKSVDA SPNDVTR-KTDQEEER

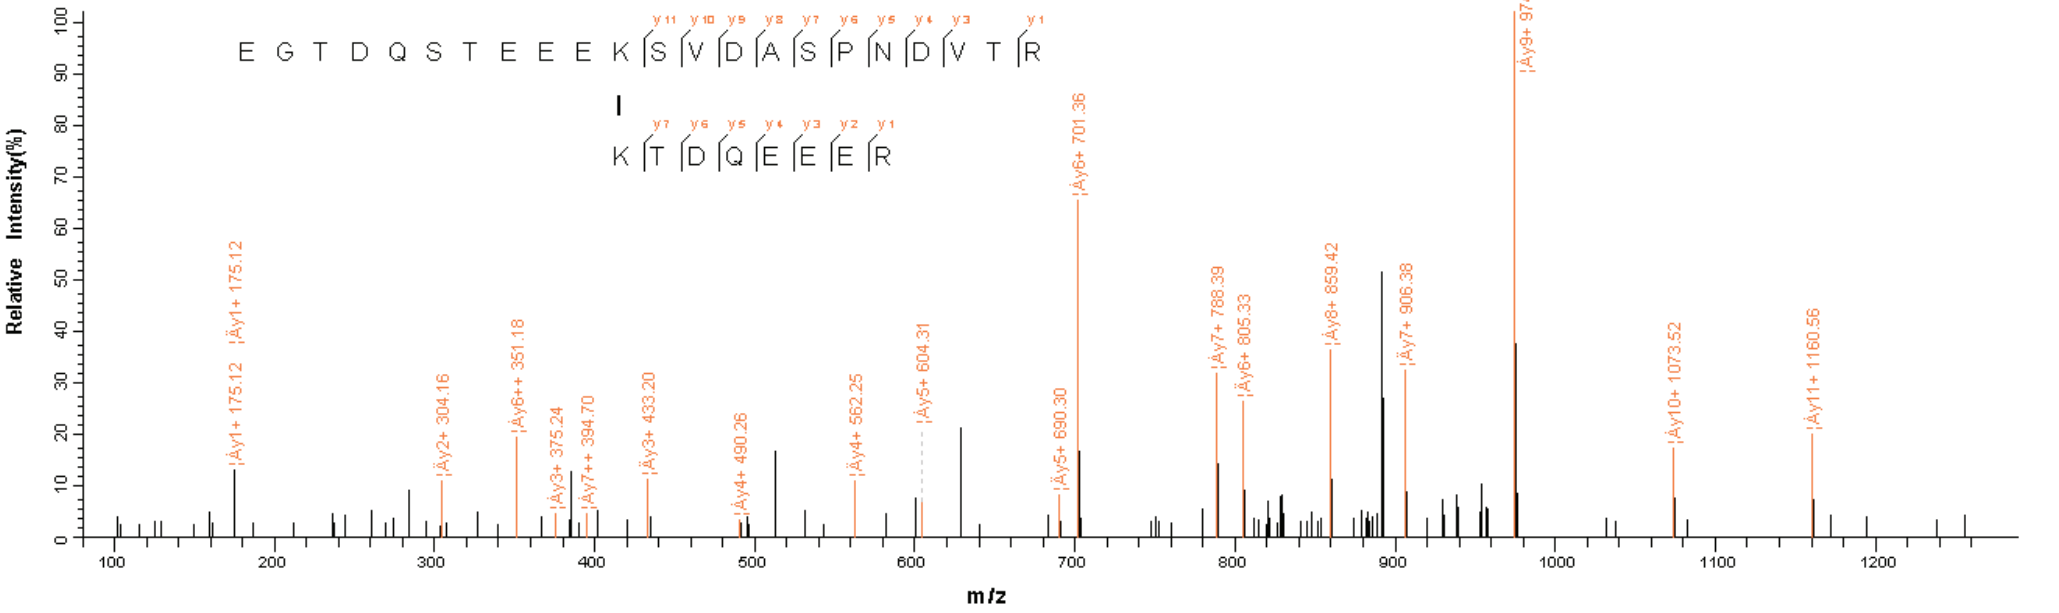

Exosome\_GFP\_test\_A9.001447.001447.4.dta Seq: NKSYPVYTR-DSDDHKR

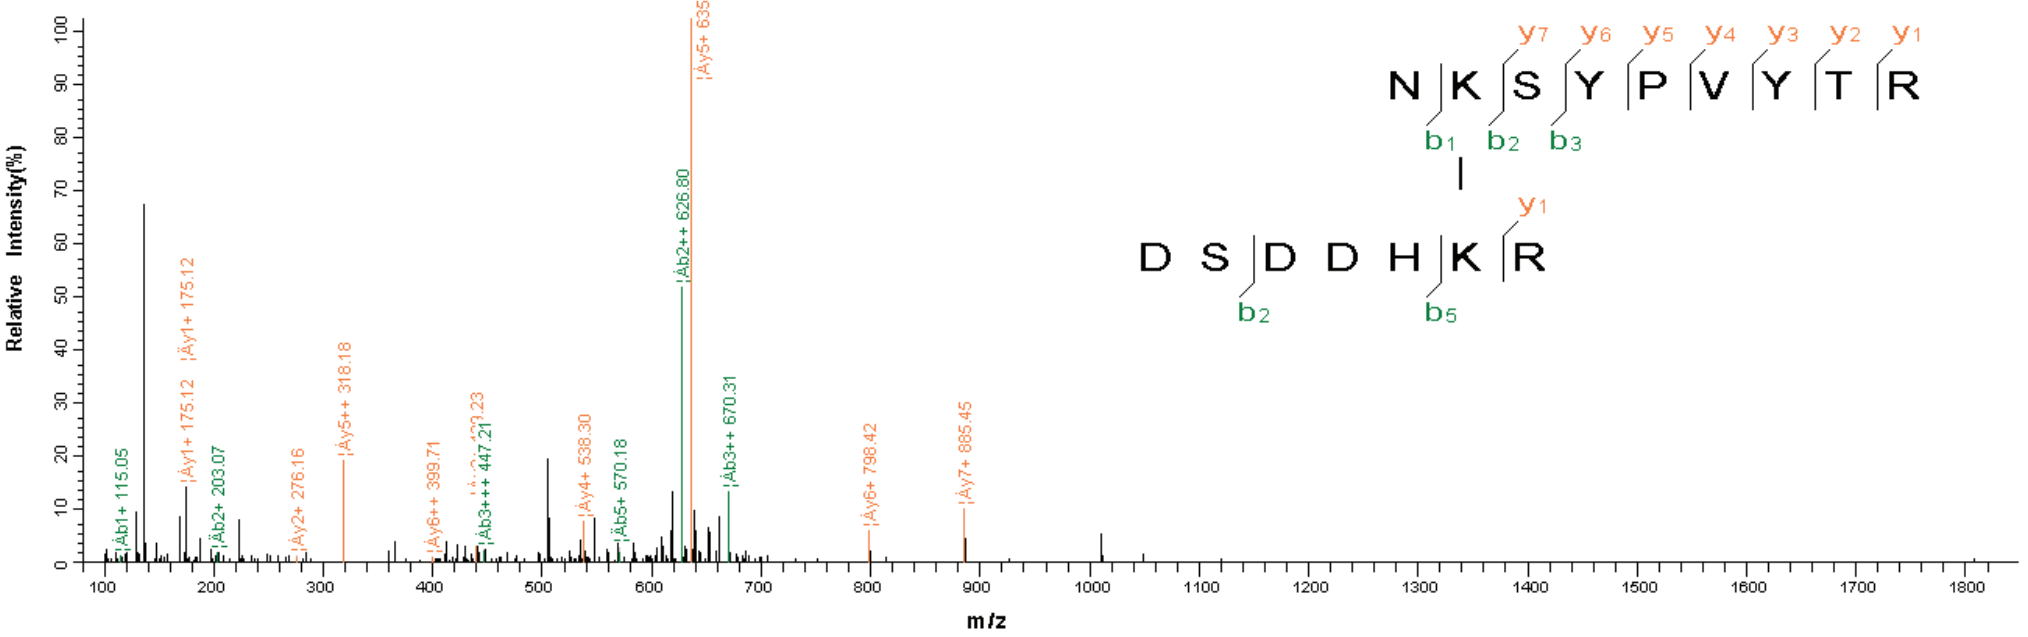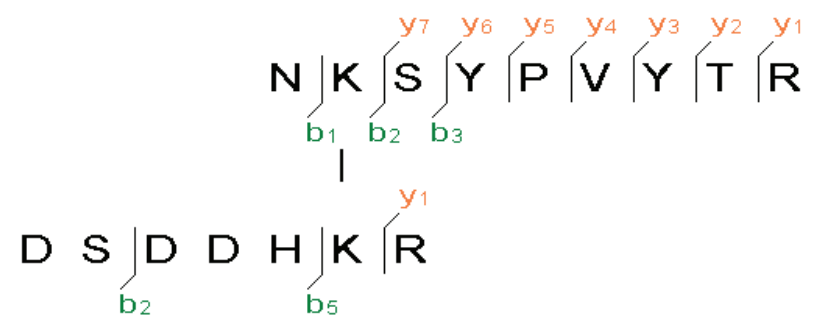



Seq: TCQWYSEHLKPYDINVVLVLPDAQNELPK Mod: 2,C\_57 28,C\_57 31,C\_57

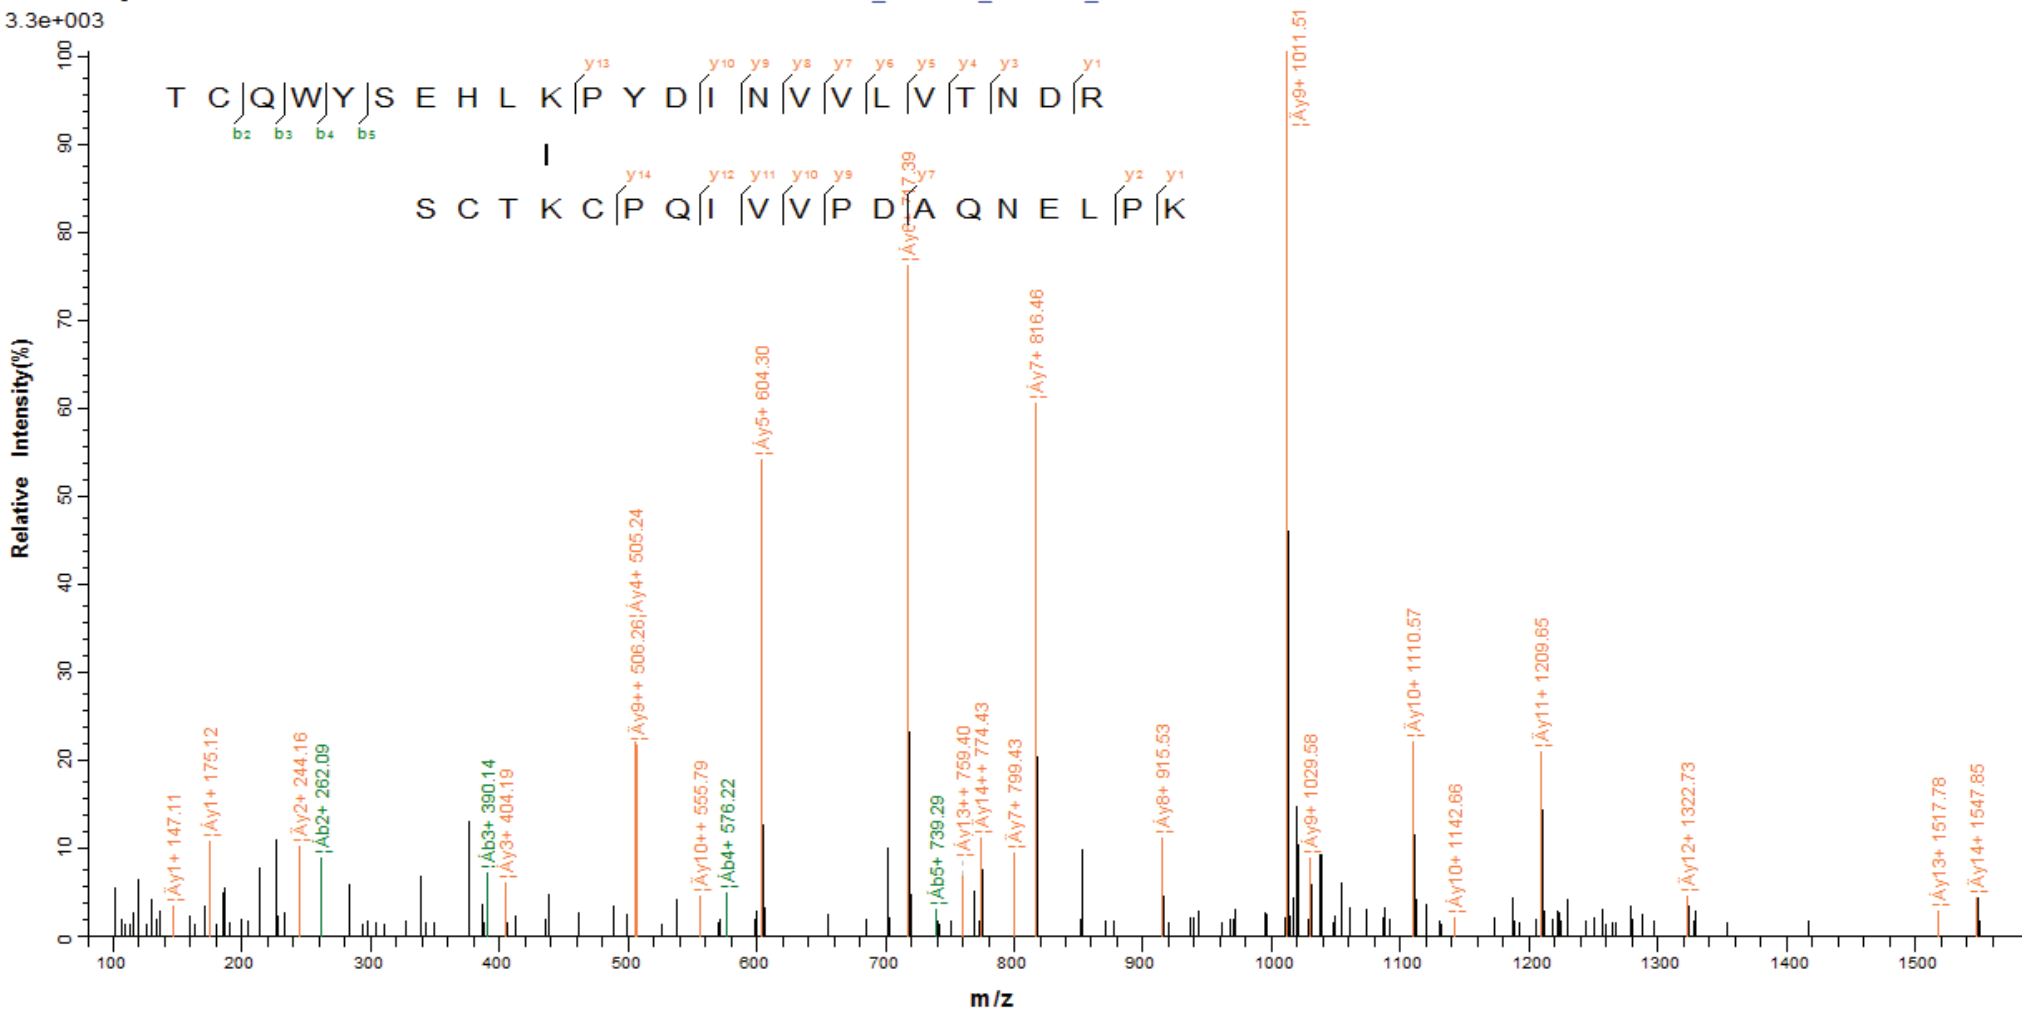

Seq: LADGLSVTQKVFVTR

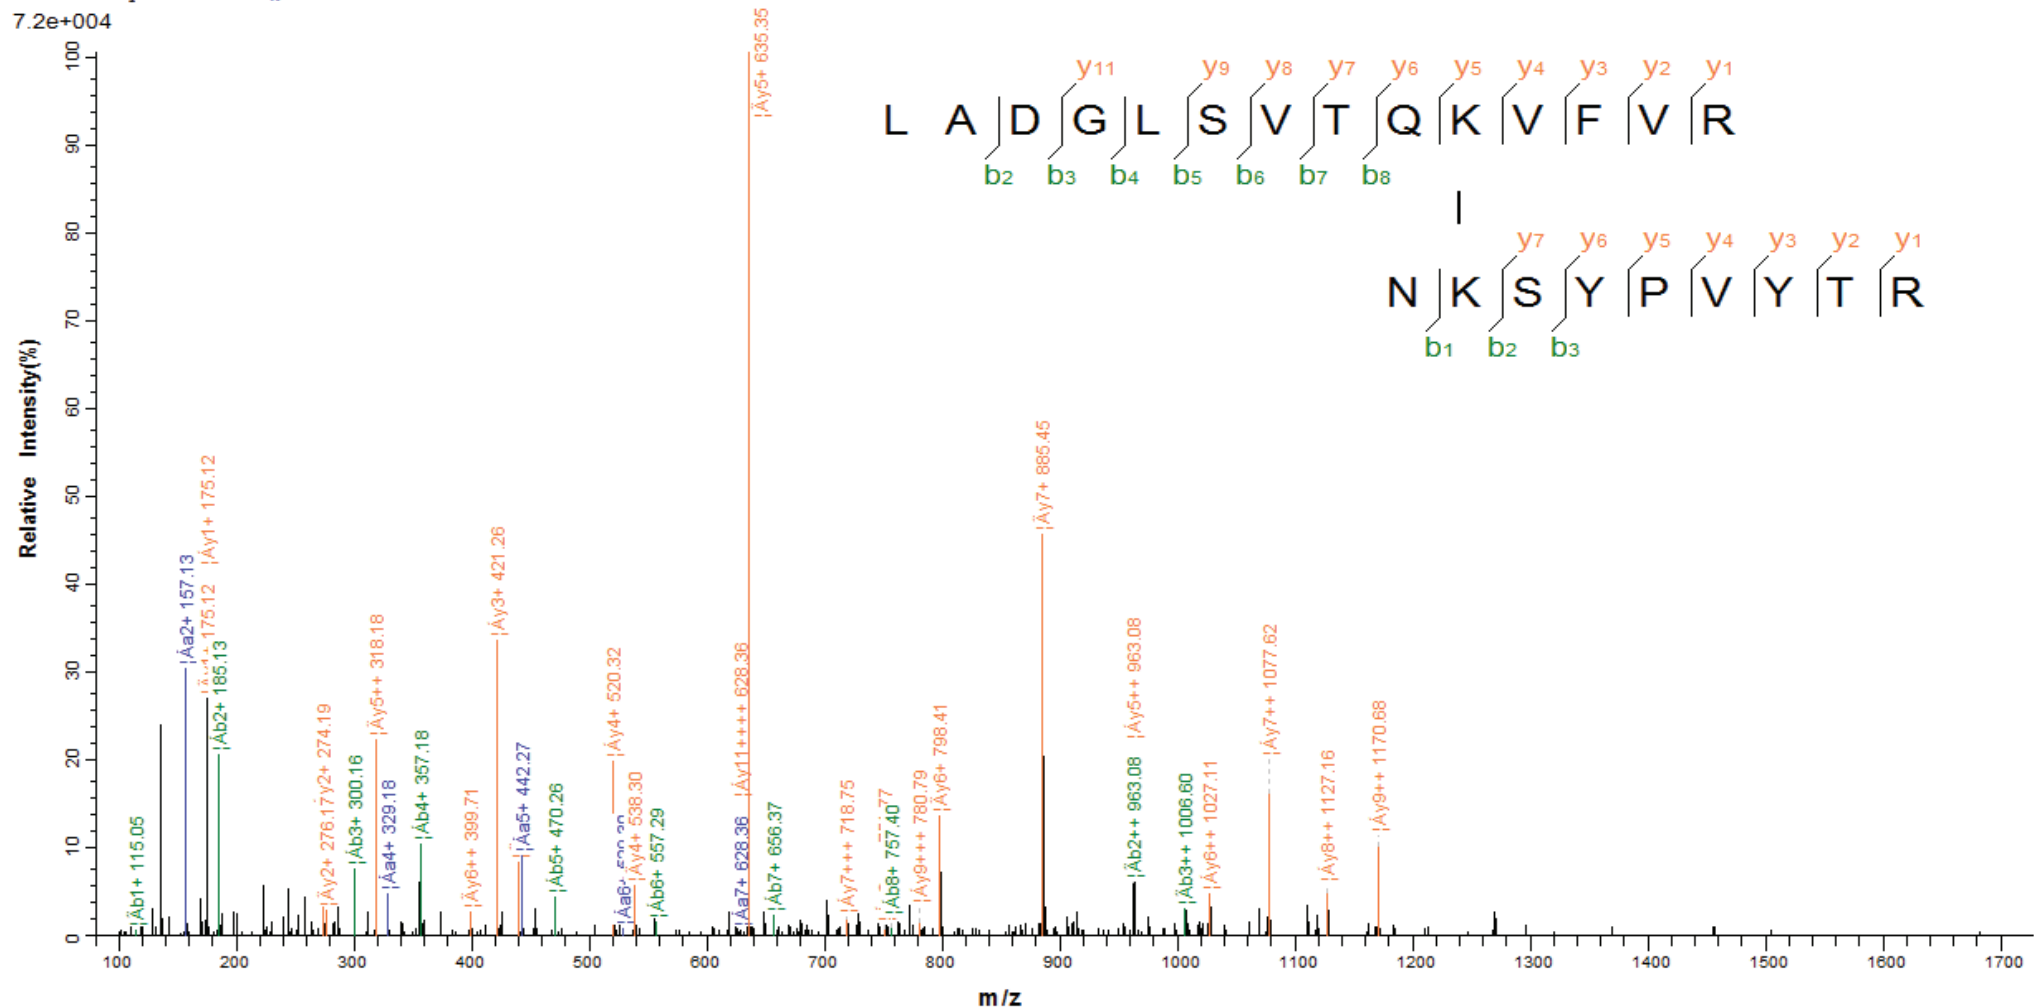

Exosome\_GFP\_test\_A9.002994.002994.4.dta Seq: LADGLSVTQKVFVRFVNR

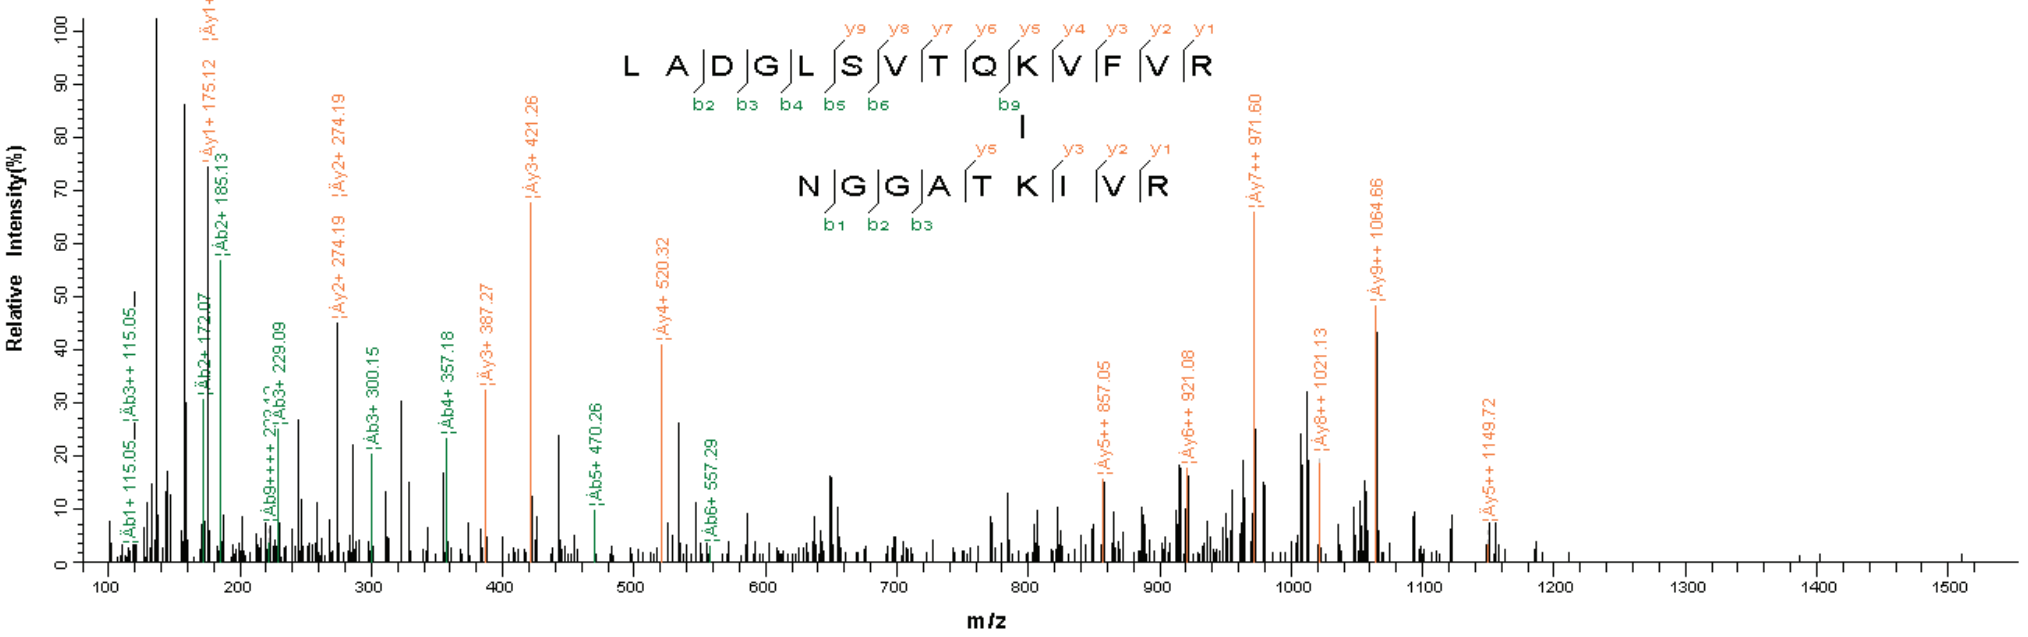

Seq: DSIPQMDSFDKDLERDTFSDFTFPEYYSTAR-NKSYPVYTR

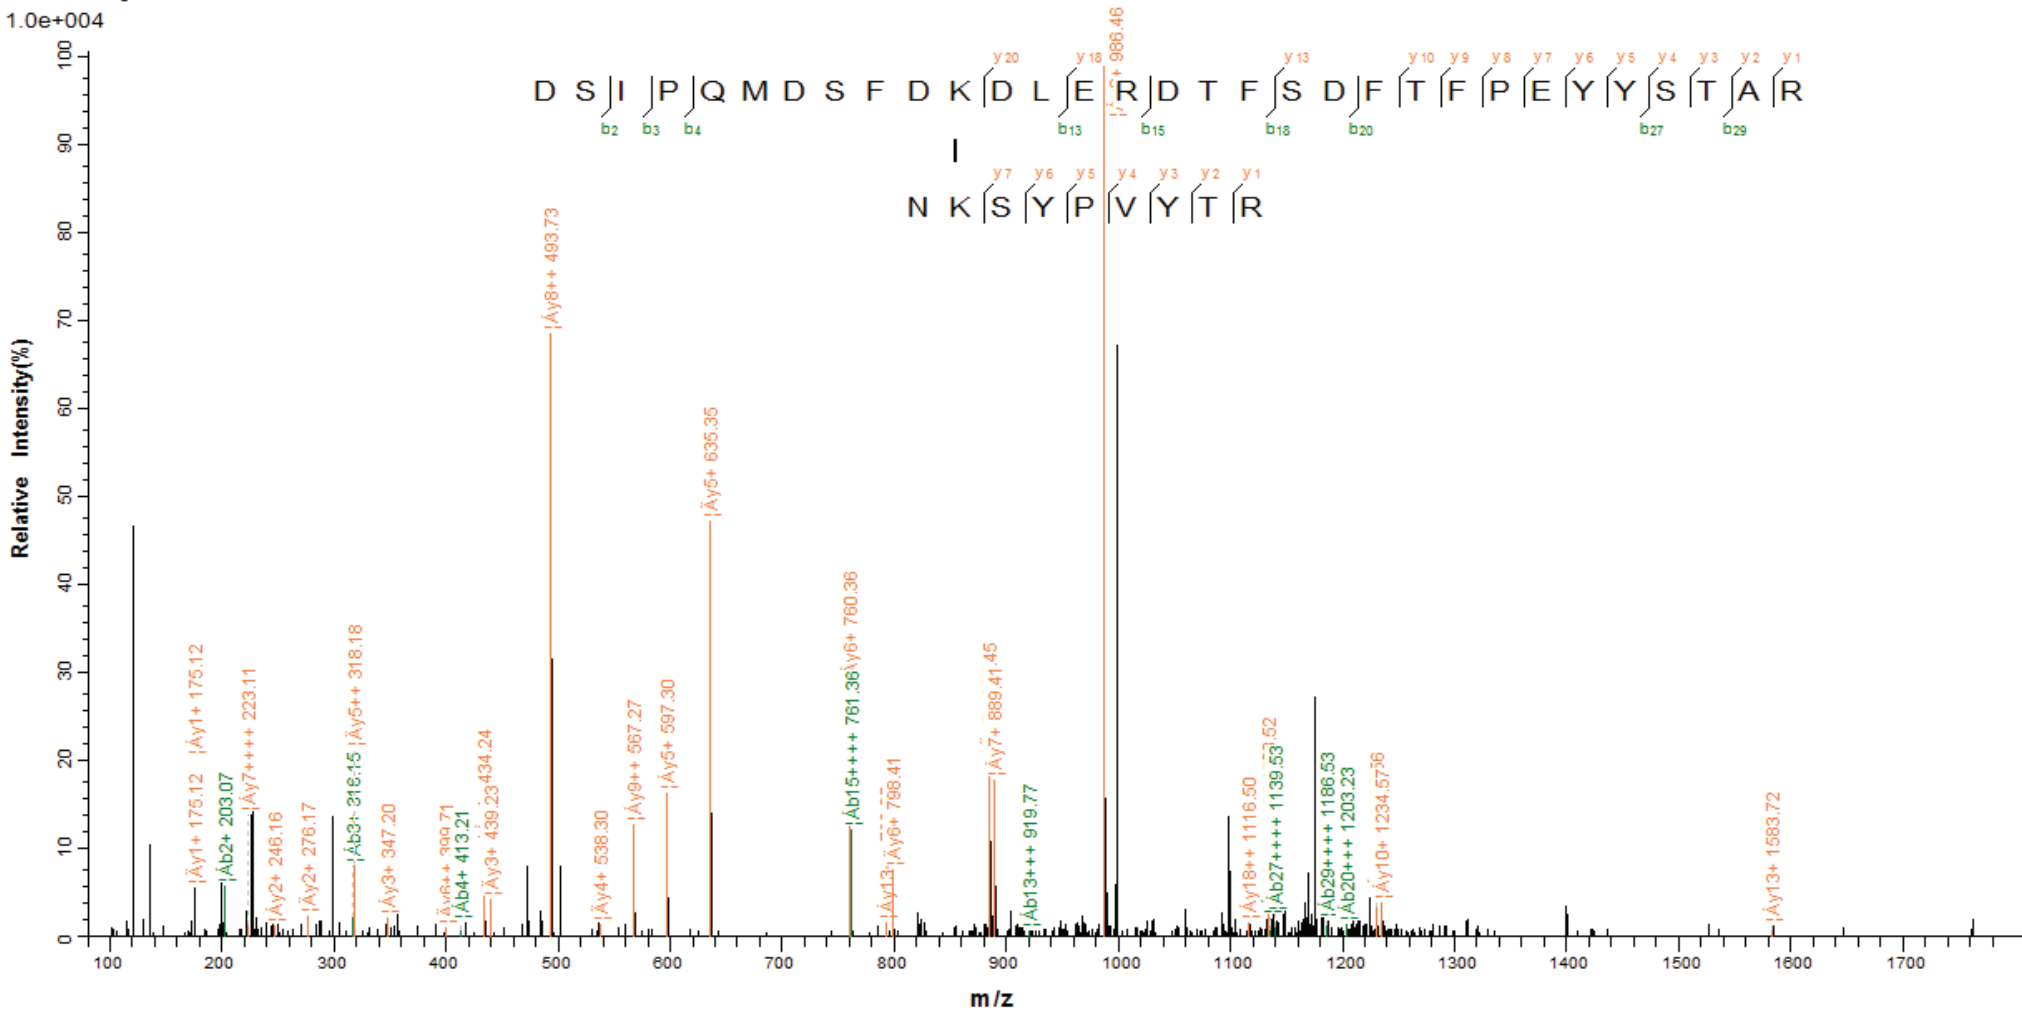

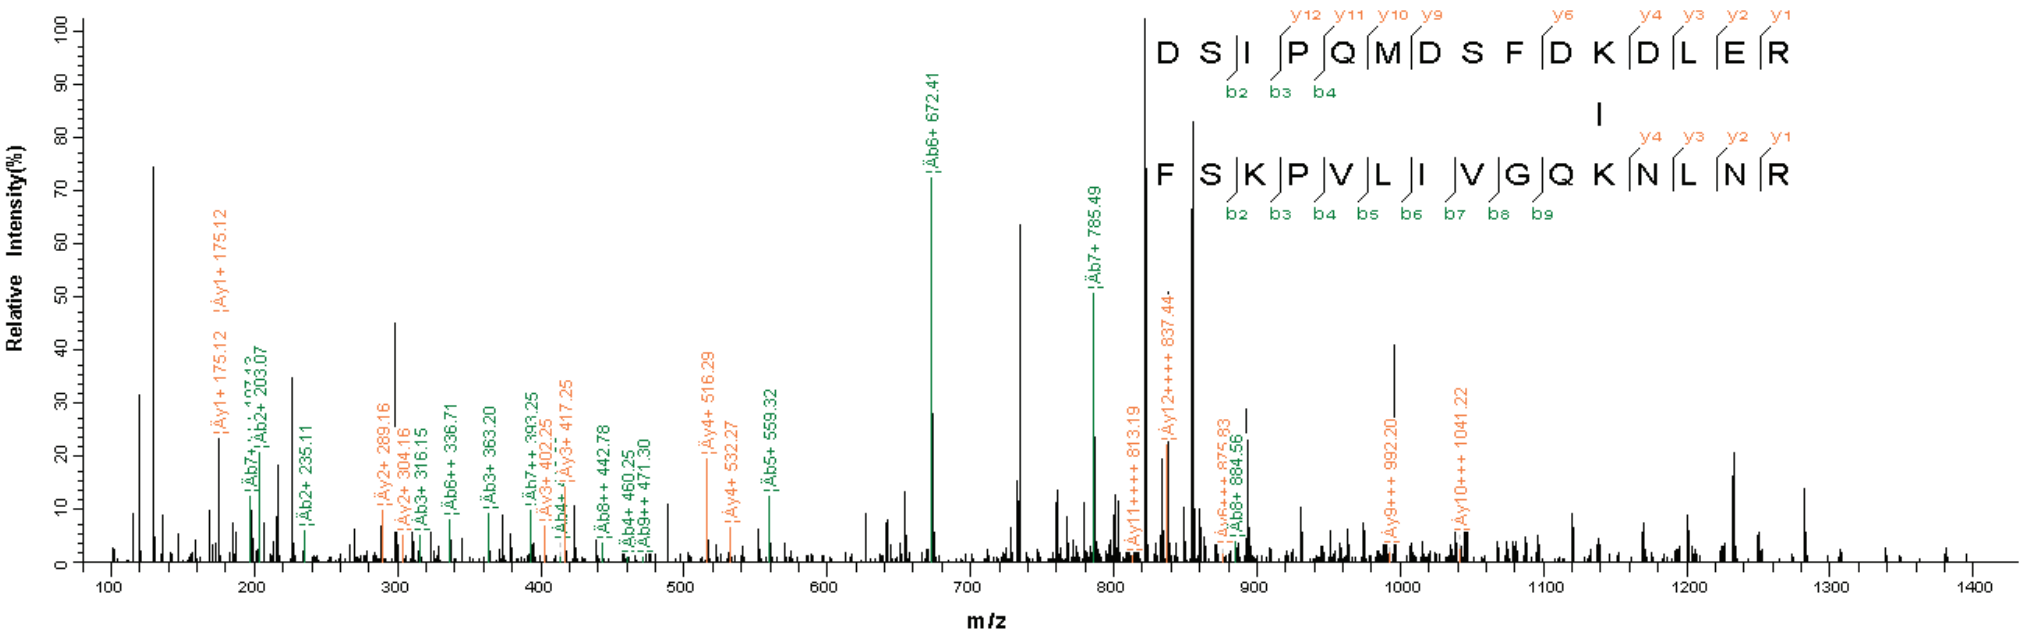

Seq: FSKPVLIVGQK-KIQPTAK

2.9e+004

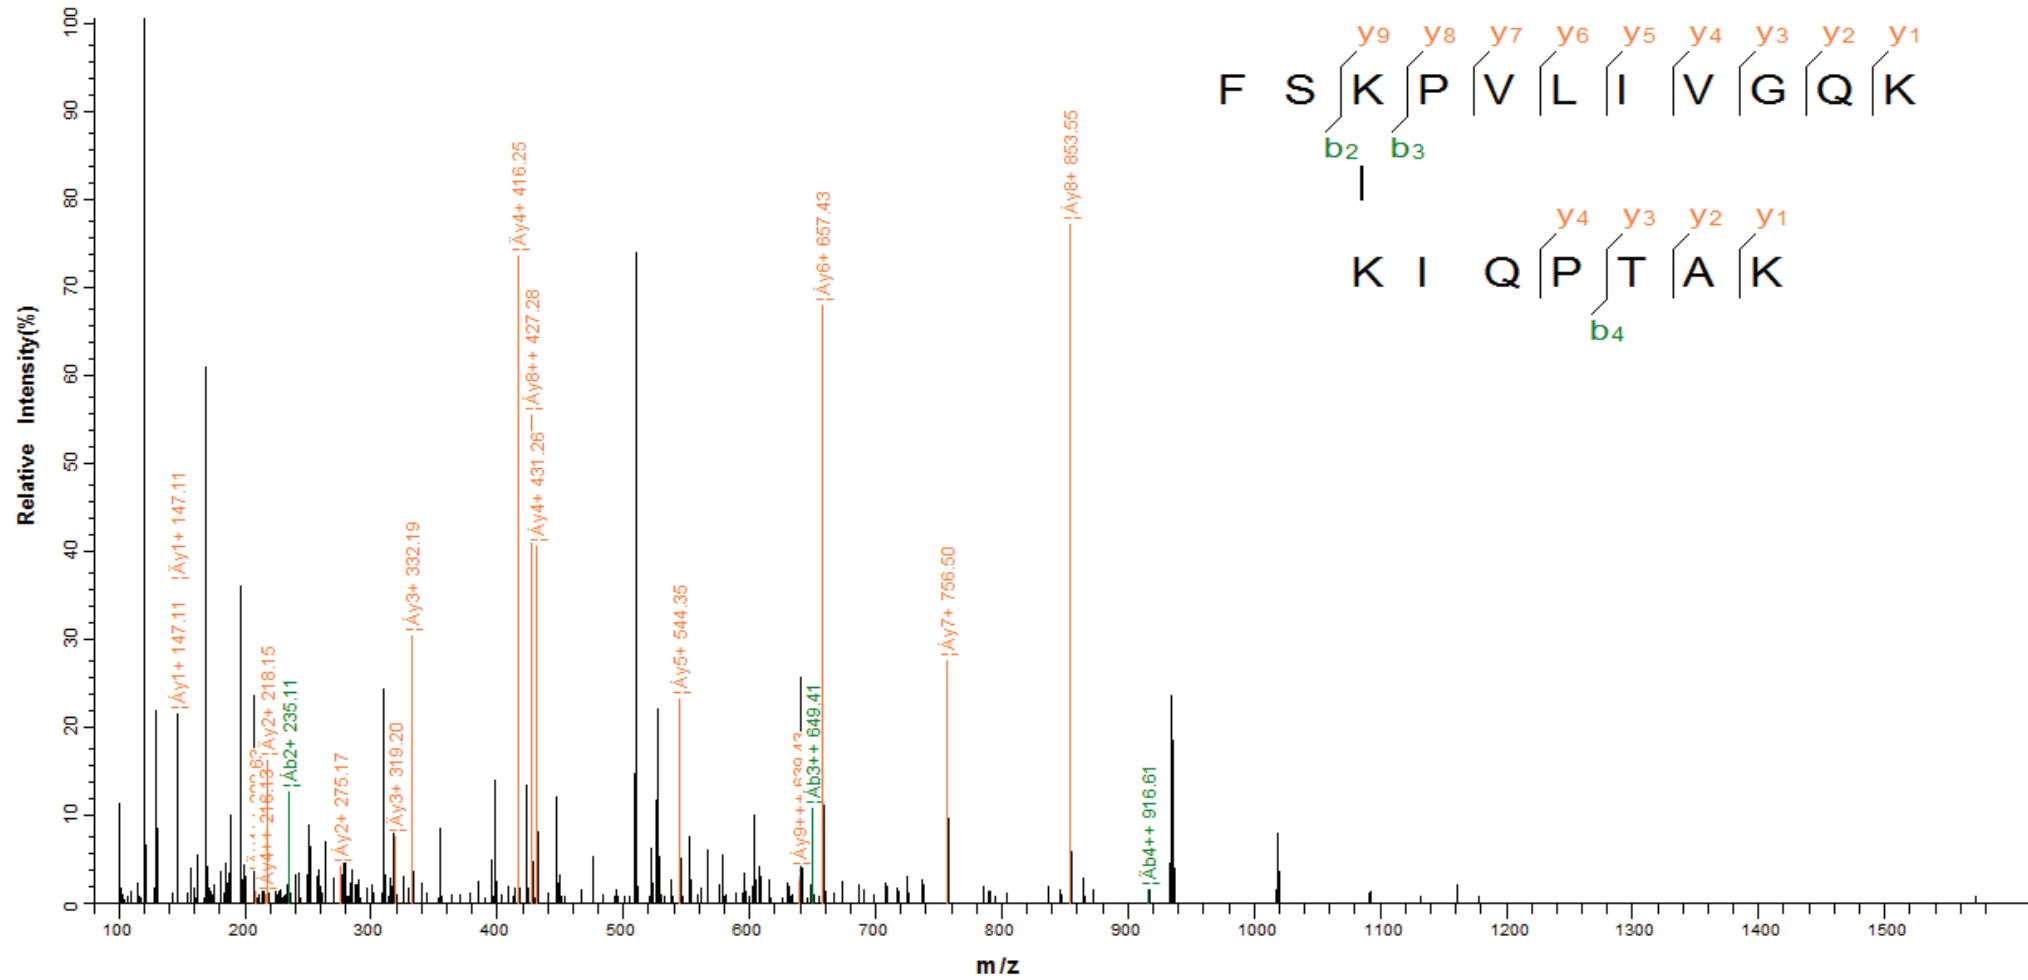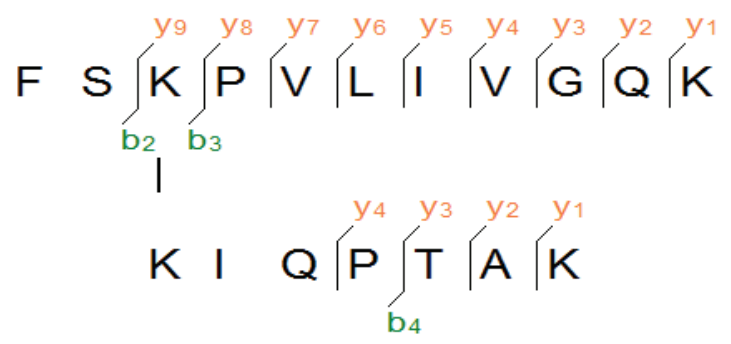

Seq: PVLIVGQKNLR-FSKPVLIVGQK

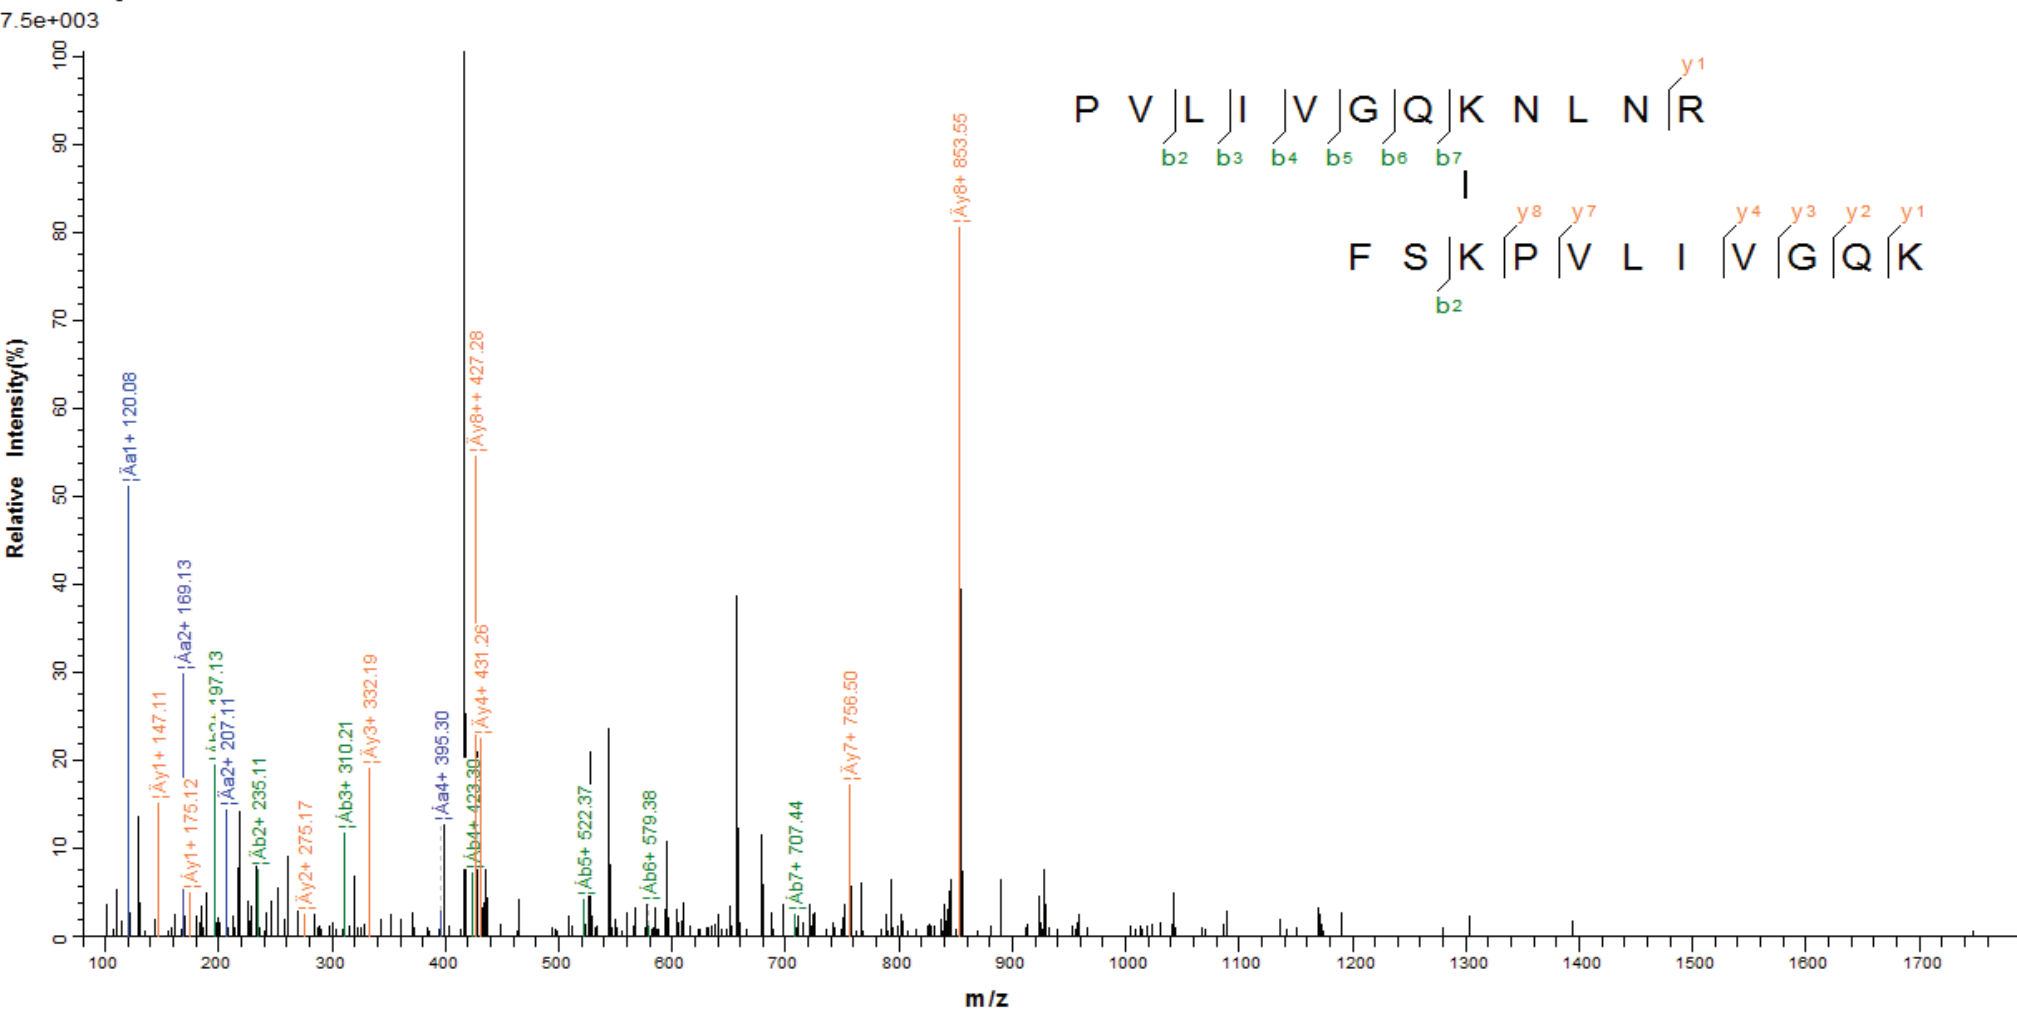

exosome\_A8\_1.005766.005766.6.dta Seq: FSKPVLIVGQKLNLR-KIQPTAKVVYIQR

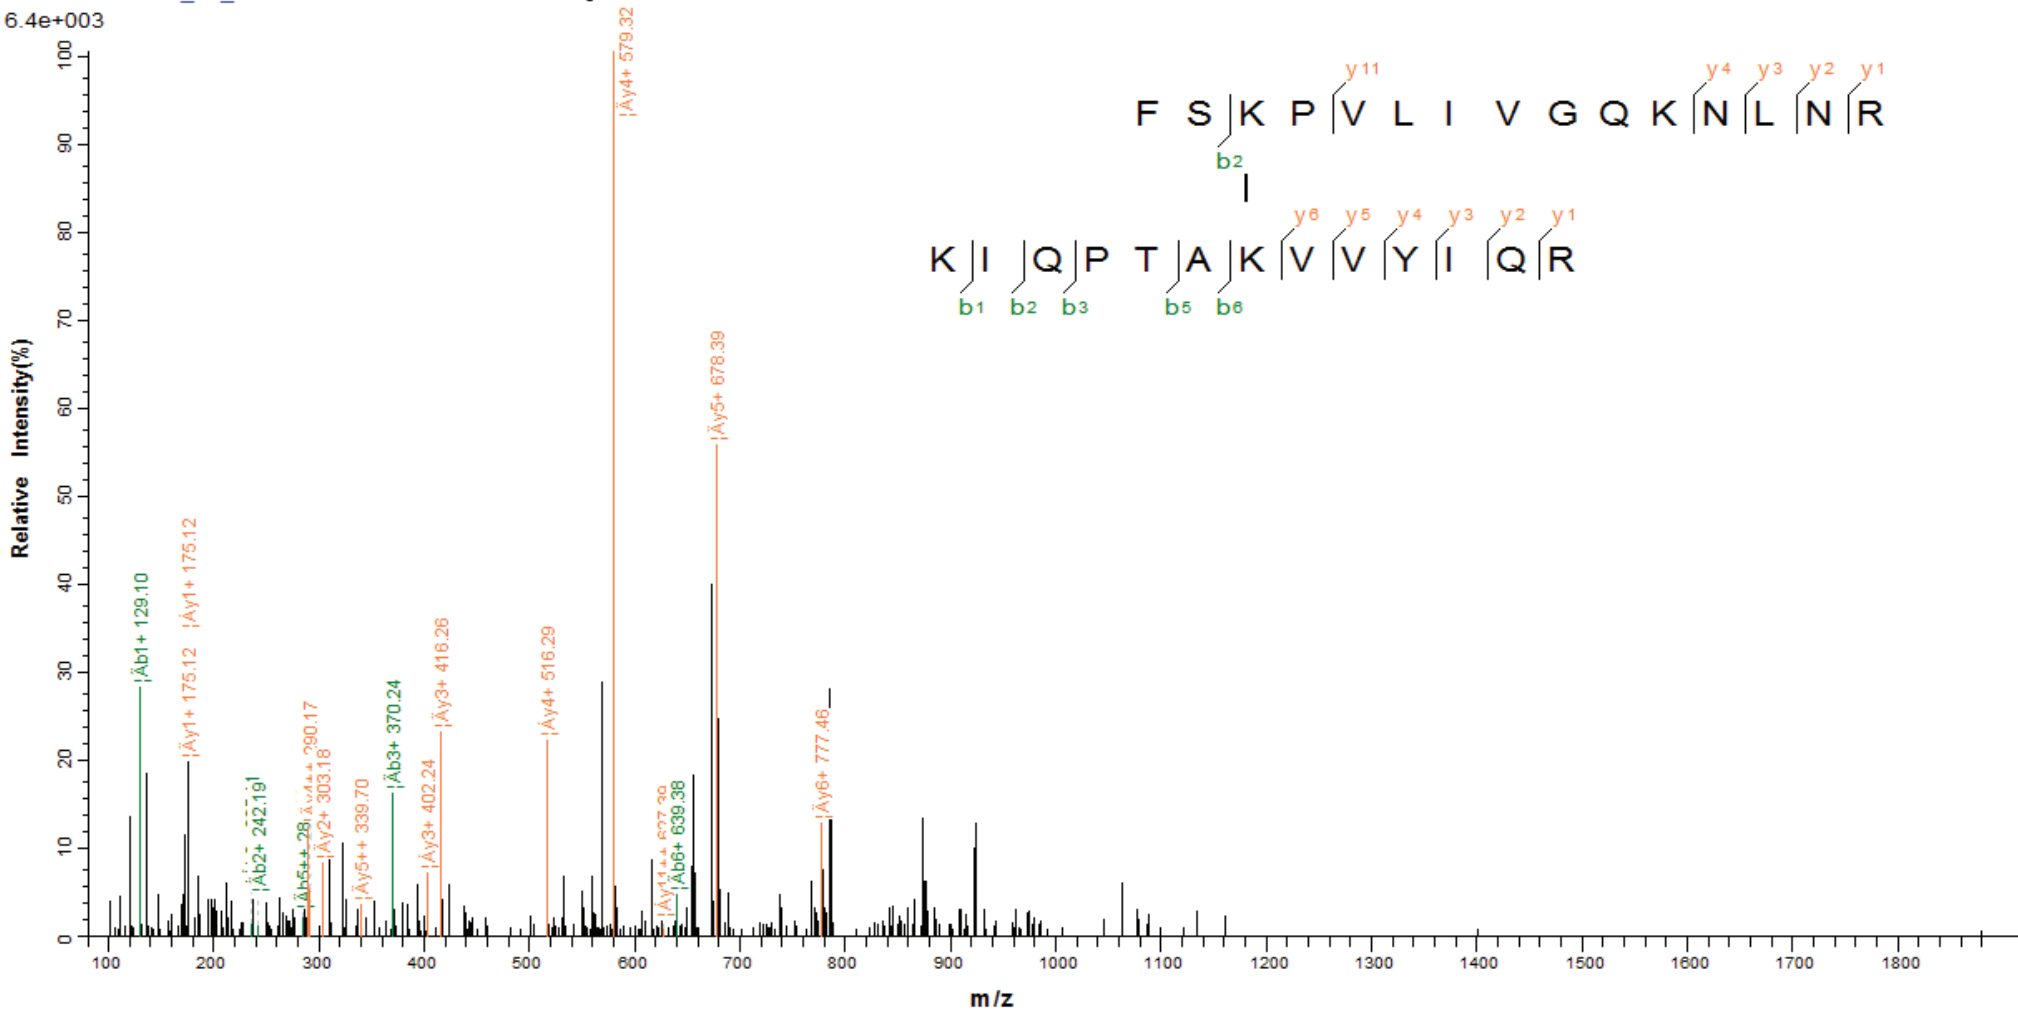



Exosome\_GFP\_test\_A9.001851.001851.4.dta Seq: LLAKDAMIAQR-KIQPTAK Mod: 7, Oxidation\_M\_15.995

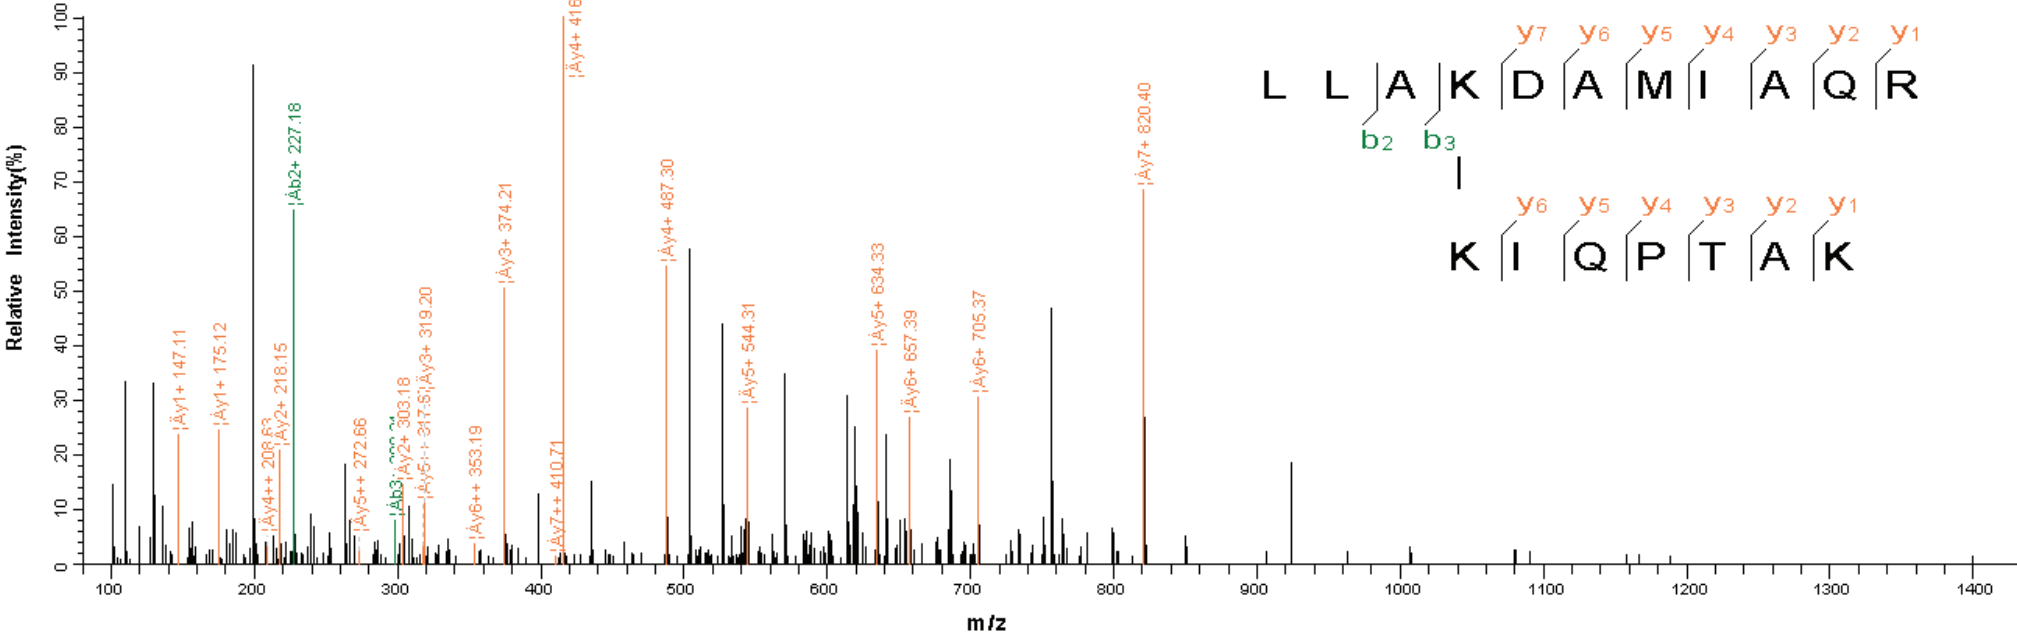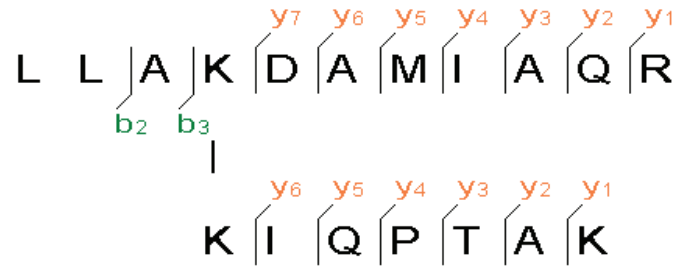

exosome\_A9\_140503145423.2671.2671.4.dta Seq: AAELLDKR-KIQPTAK

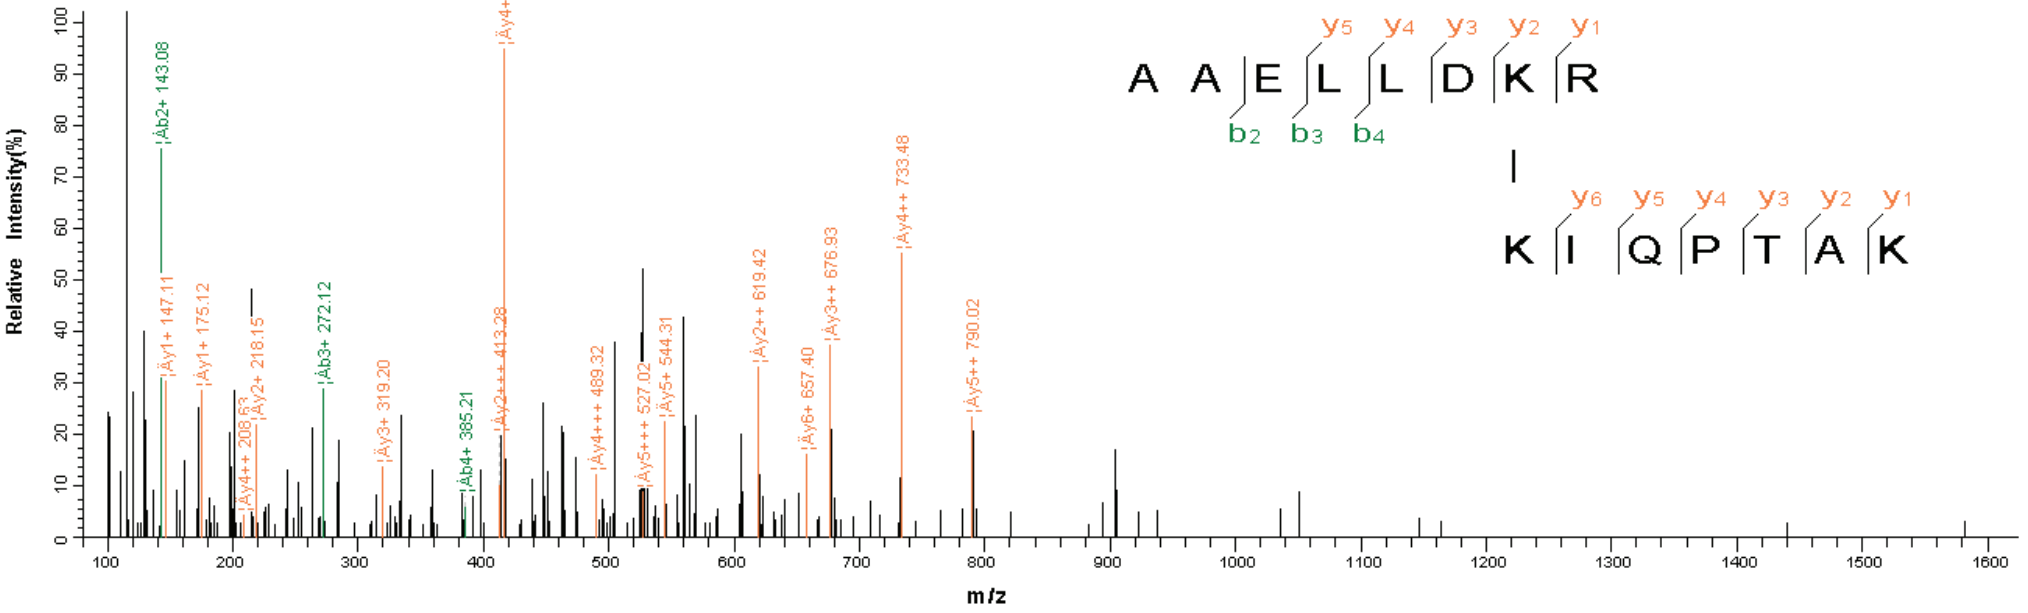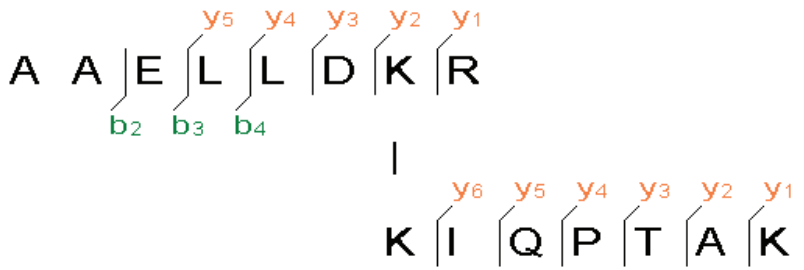

exosome\_A9\_140503145423.3261.3261.4.dta Seq: AAELLDKR-CLPKVR Mod: 12,C\_57

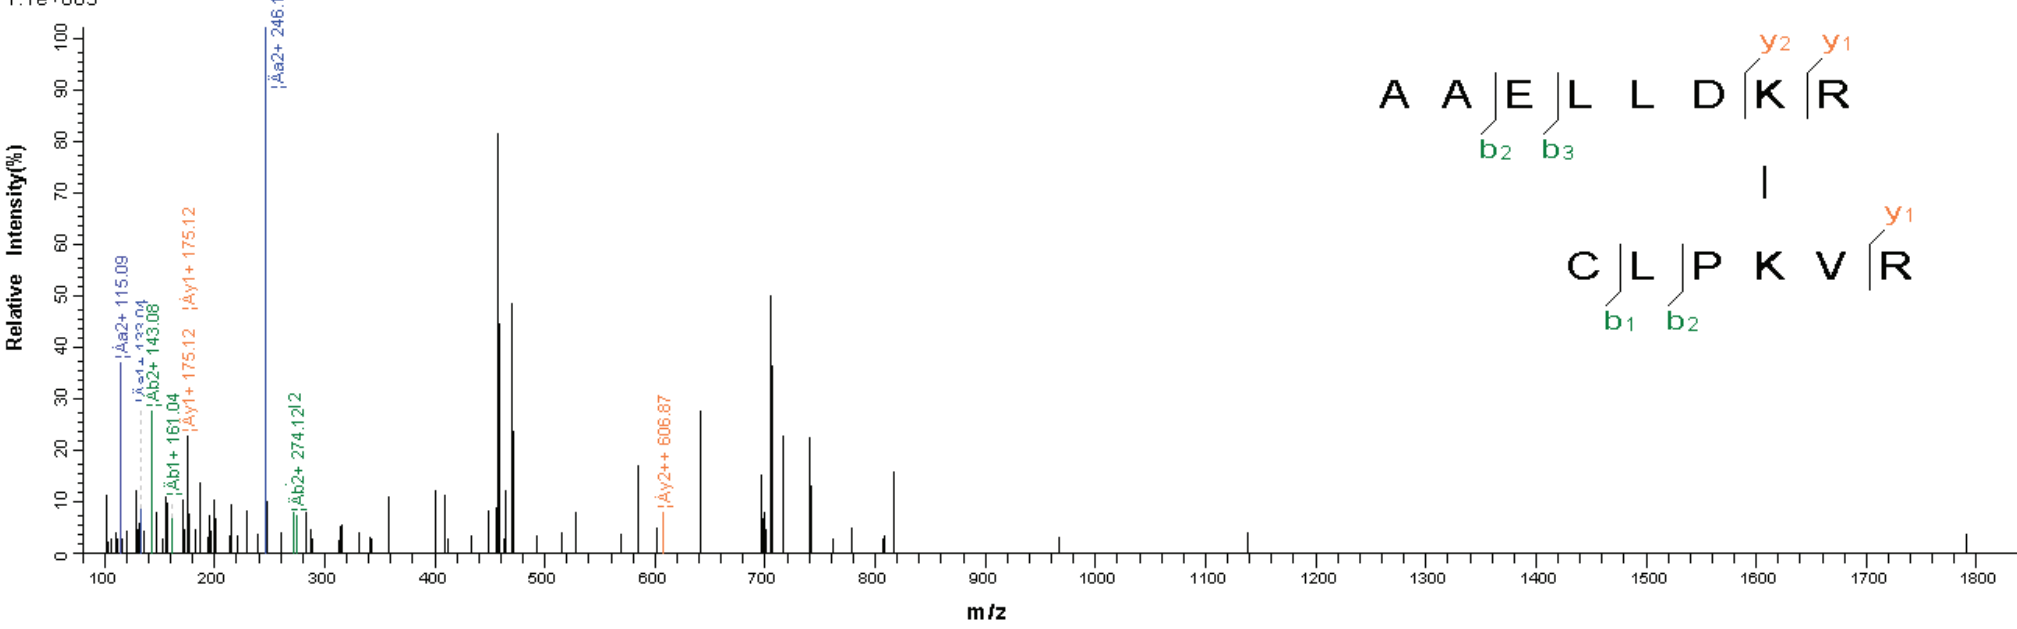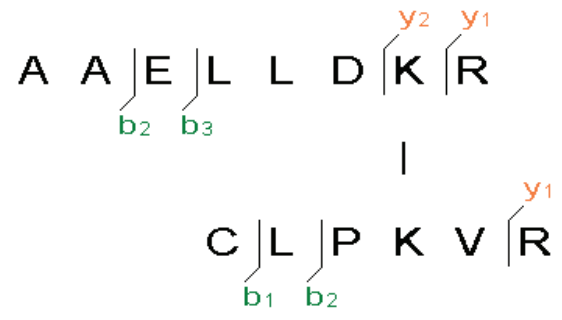

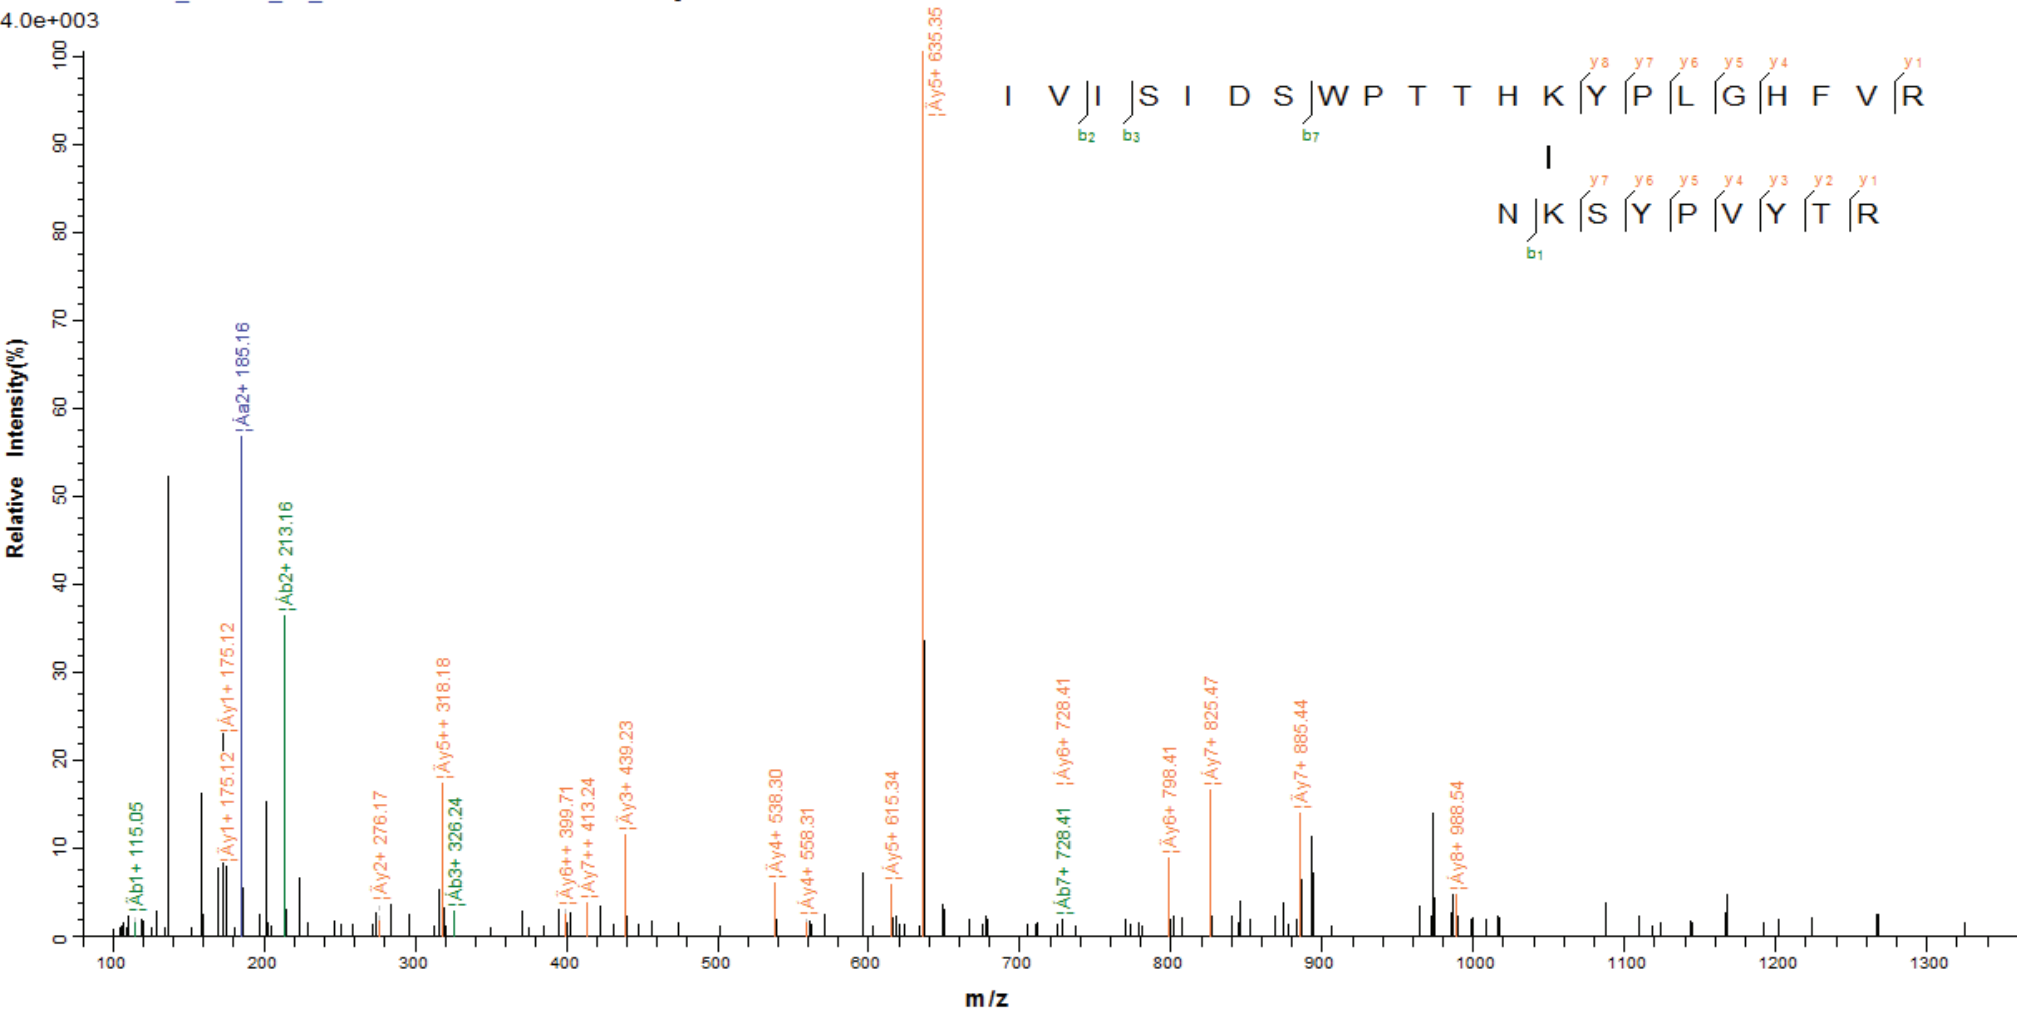

Seq: IVISIDSWPTTHKYP L G H F V R - F S K P V L I V G Q K N L N R

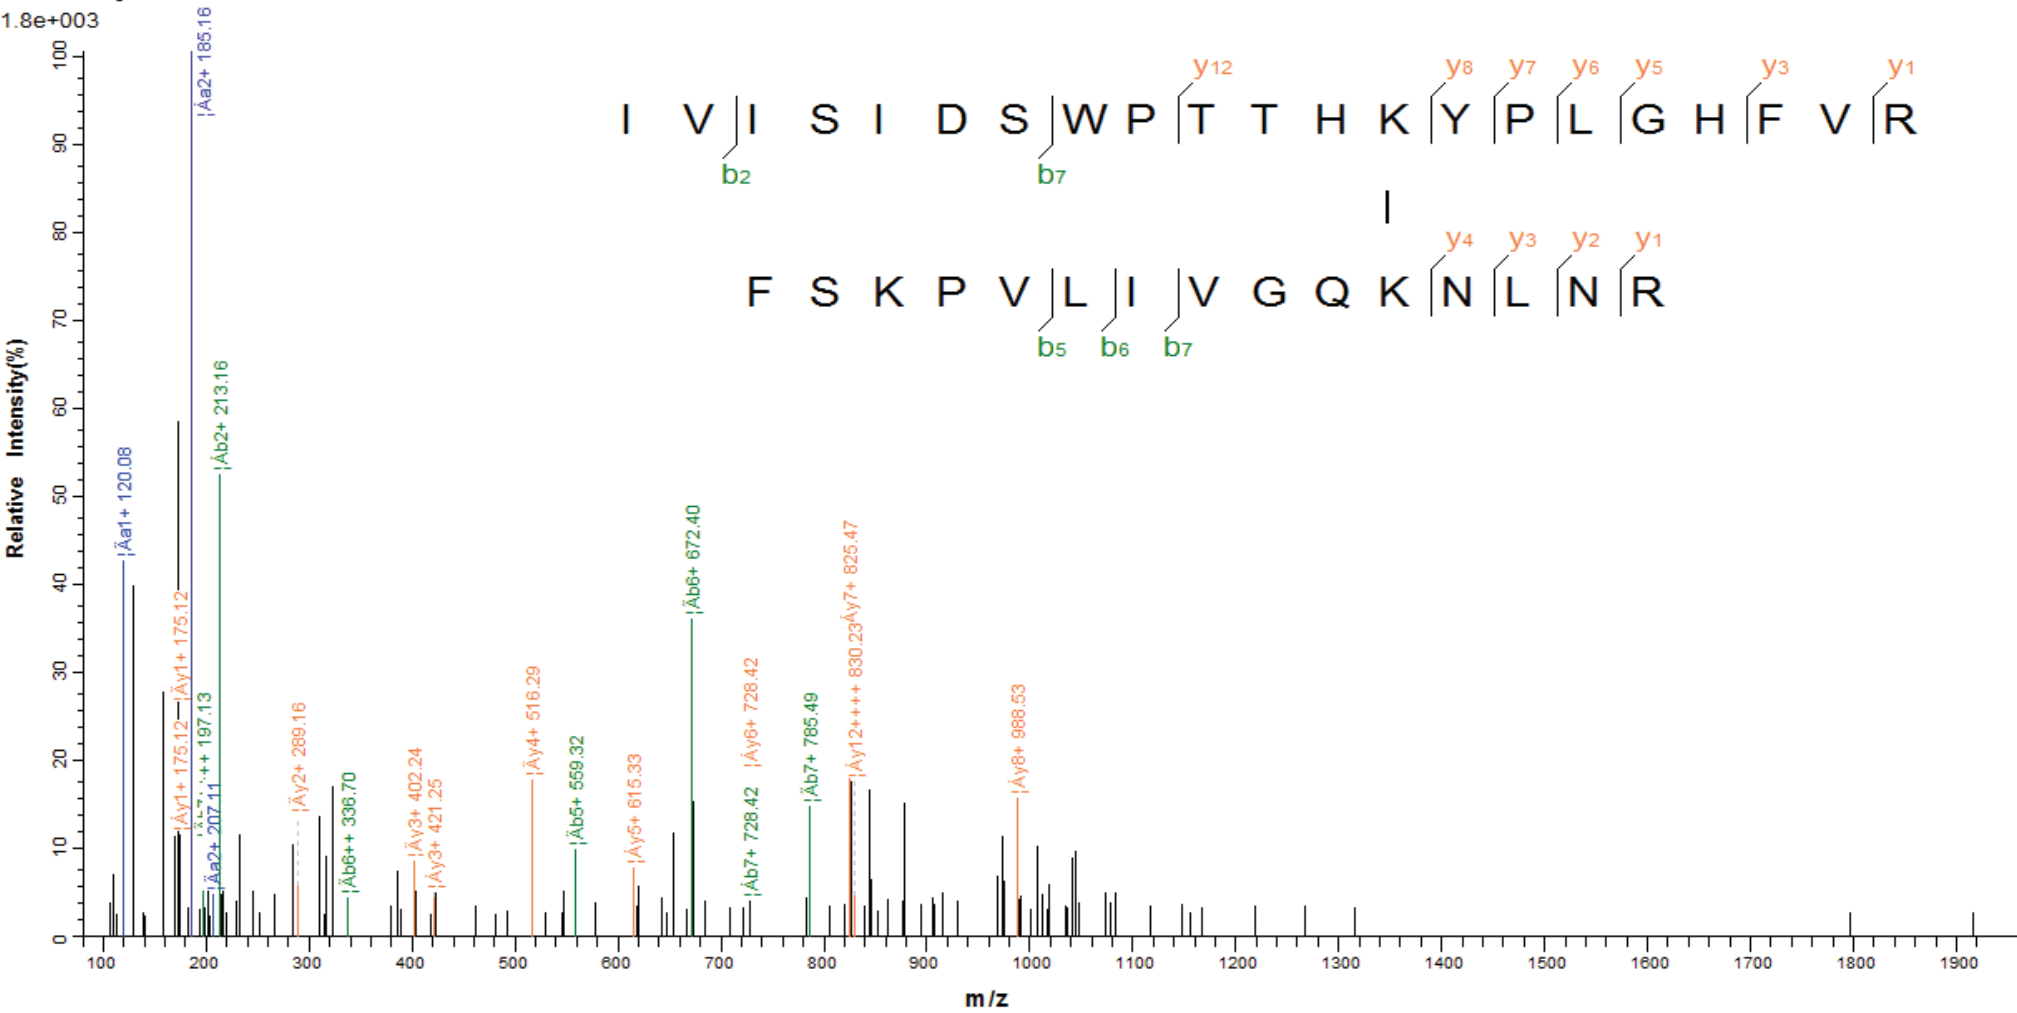

Seq: IVISIDSWPTTHKYPLGHFVR-CLPKVR Mod: 25,C\_57

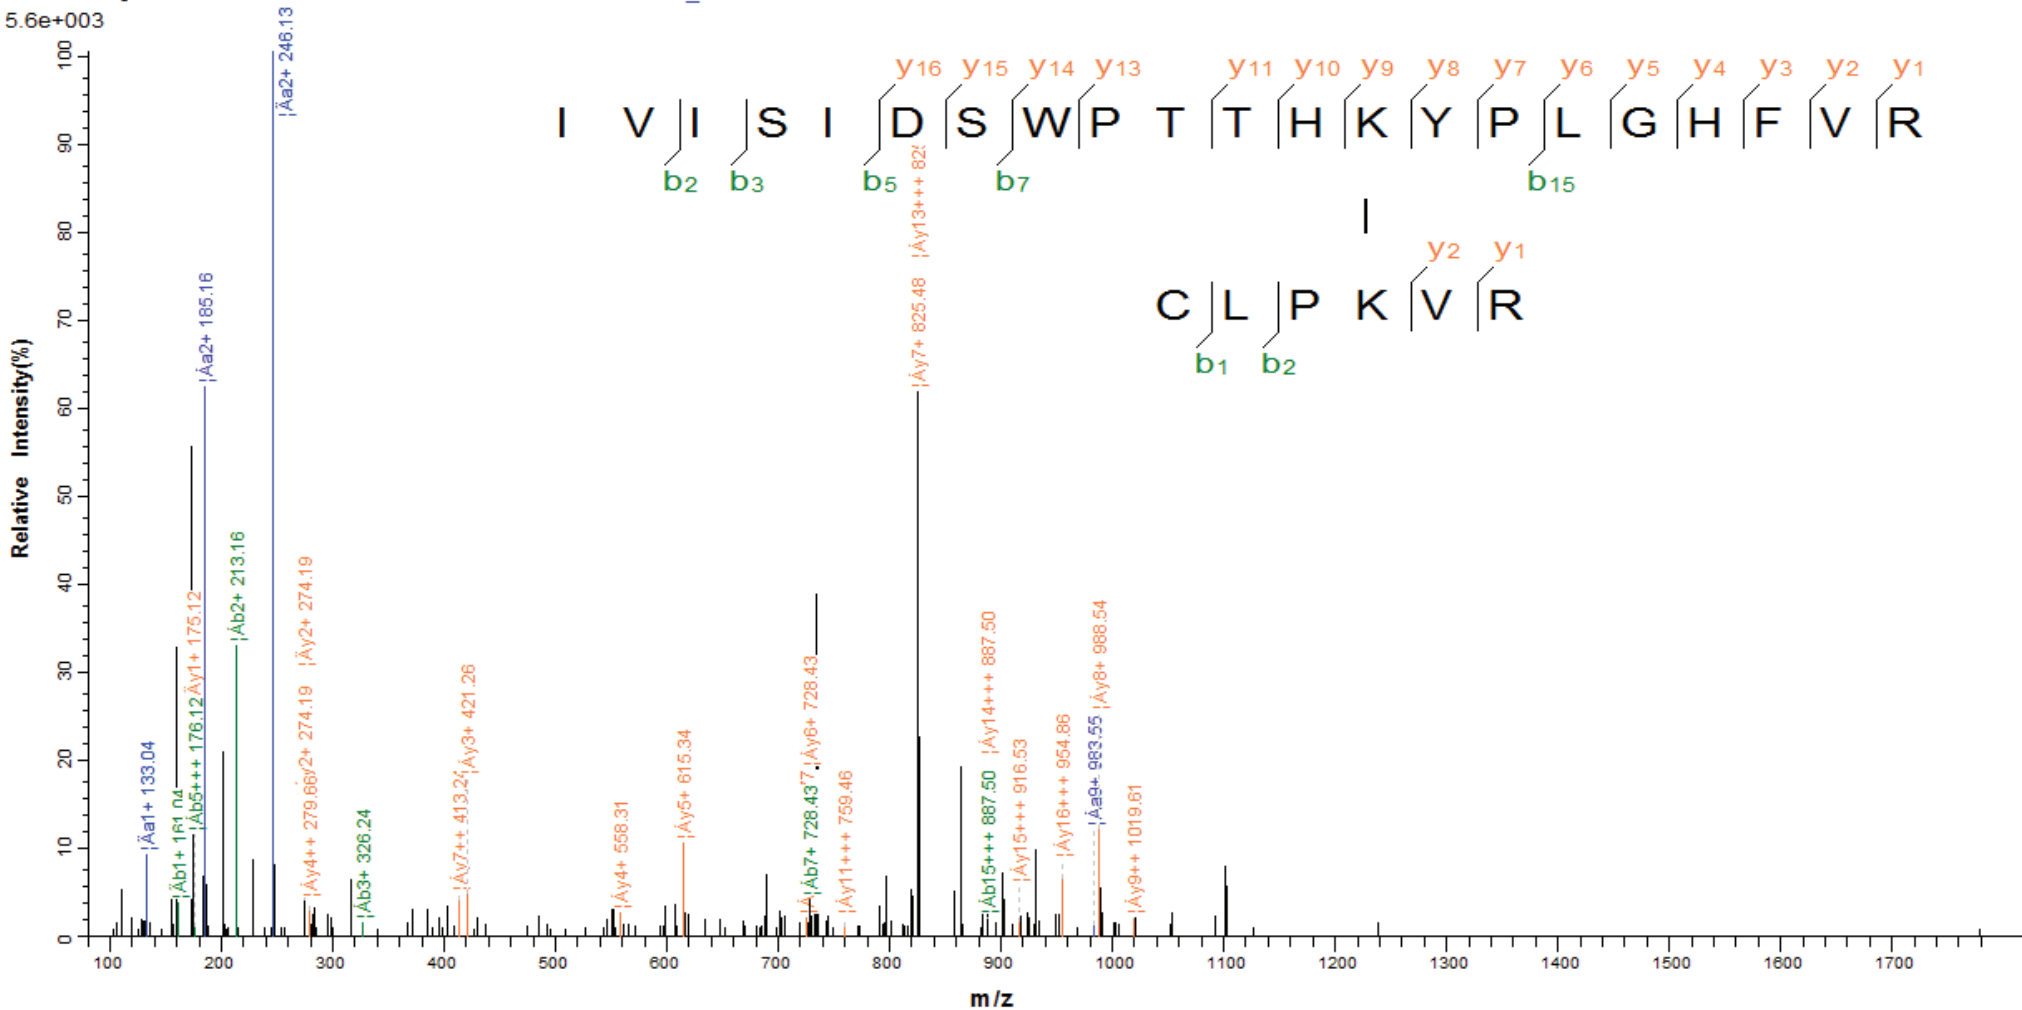

Exosome\_GFP\_test\_A9.001909.001909.4.dta Seq: APTKLDDEAVSK-KDLR

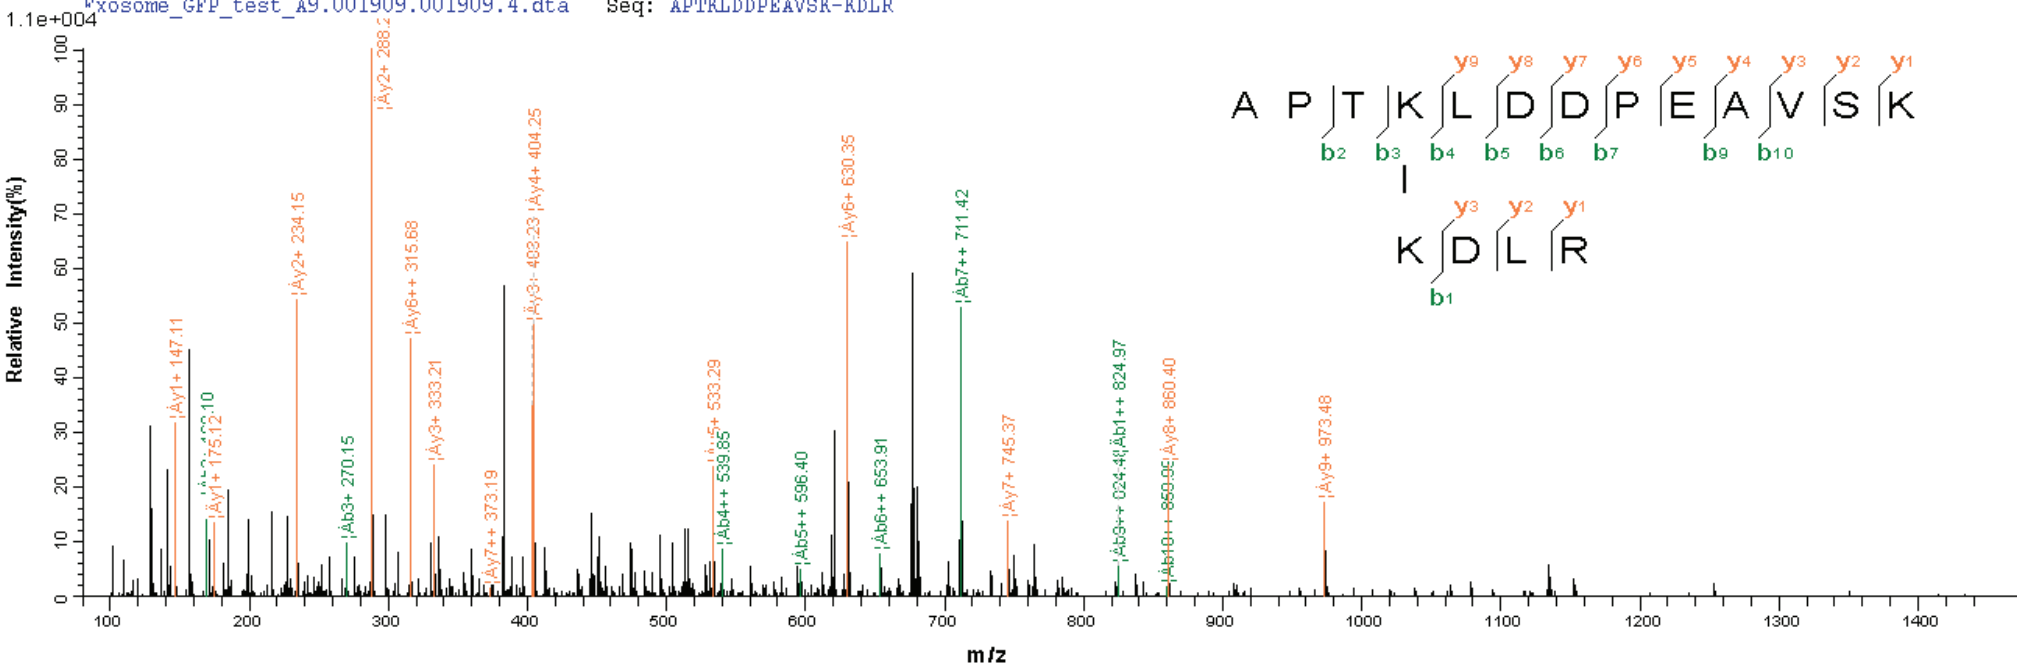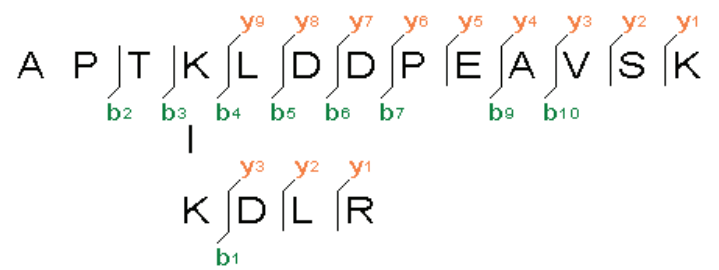

Seq: APTKLLDDPEAVSKDPLLTK-RKDLR

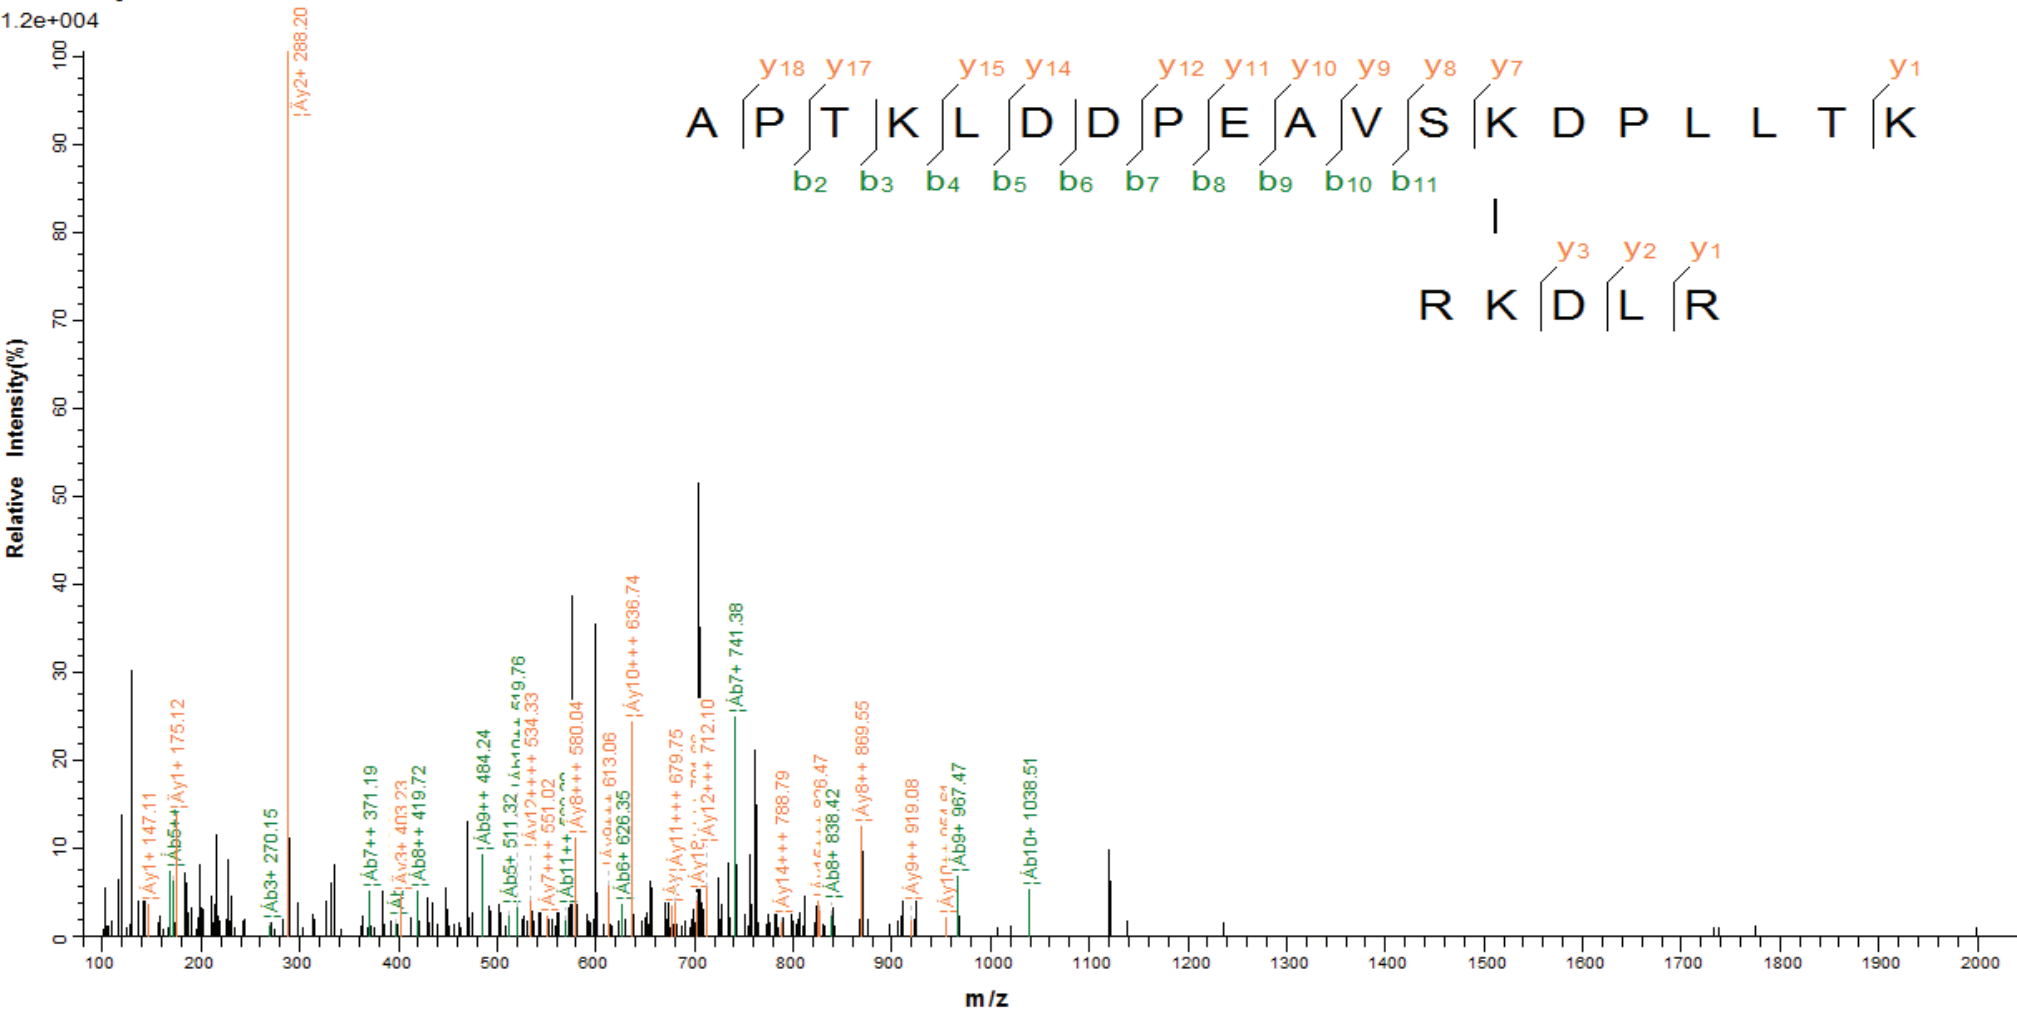



2.6e+004  
xosome\_GFP\_test\_A9.002008.002008.4.dta Seq: DPLLTKR-KDLR

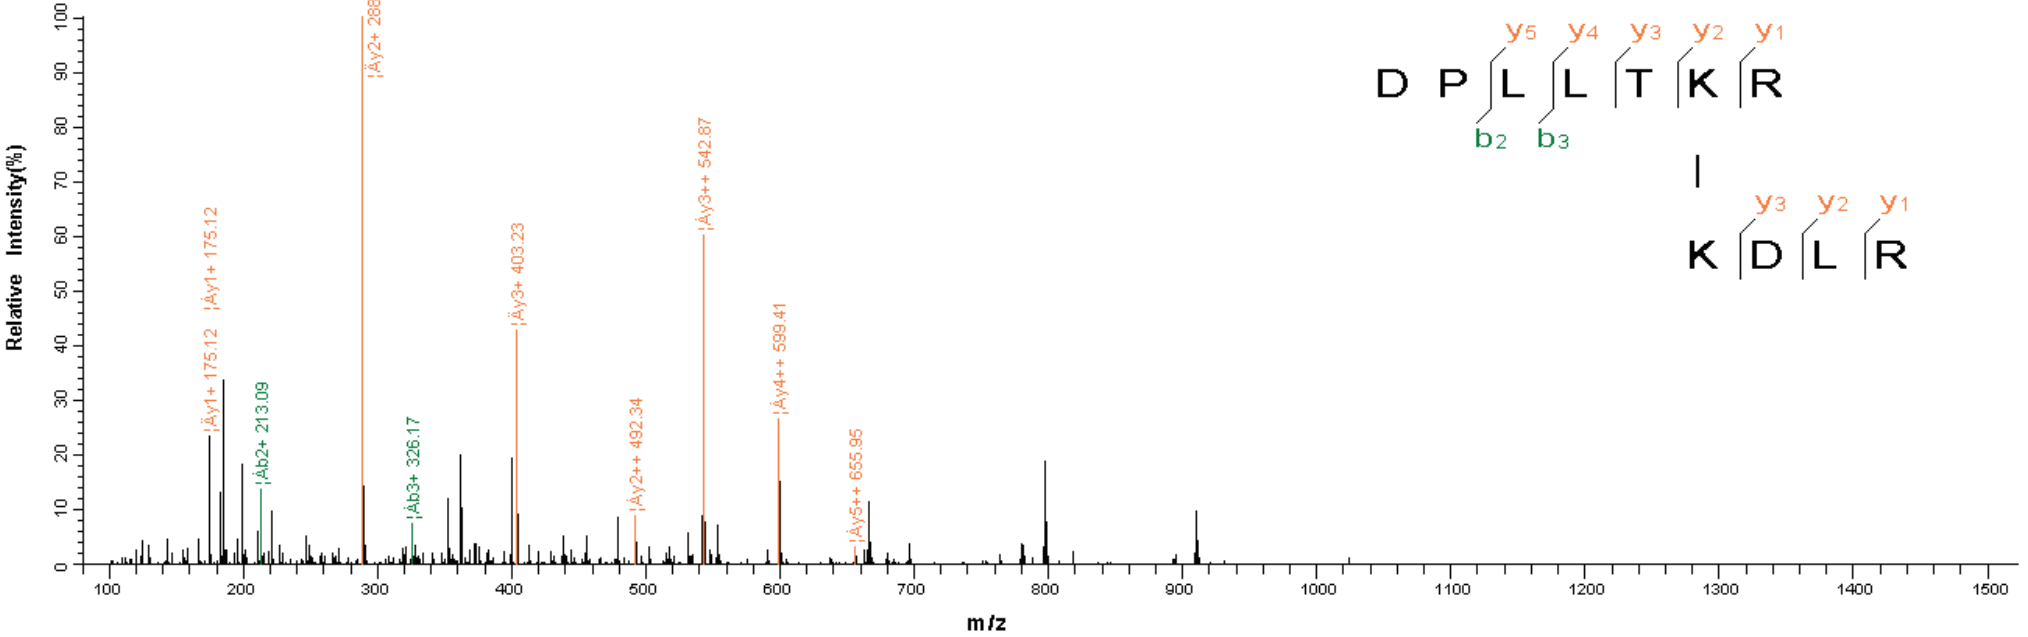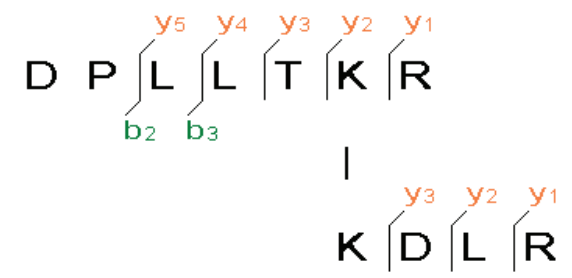

exosome\_A8\_140503145423.4648.4648.5.dta Seq: LDDPEAVSKDPLLT<sup>y1</sup>TKR

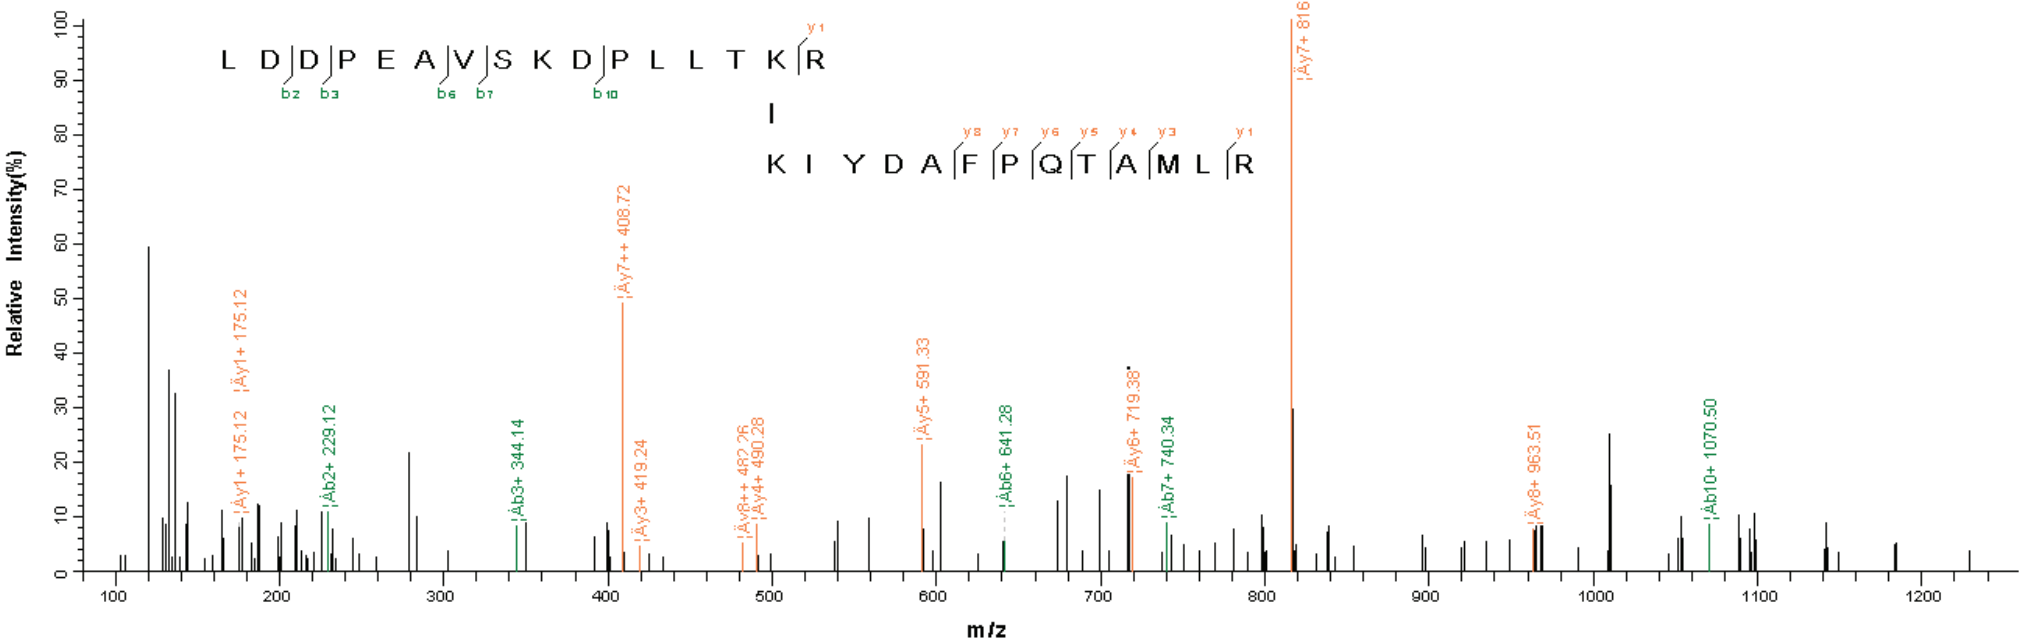

Seq: DKLICSIDPPGCVDIDDALHAK-KDLR Mod: 5,C\_57 12,C\_57

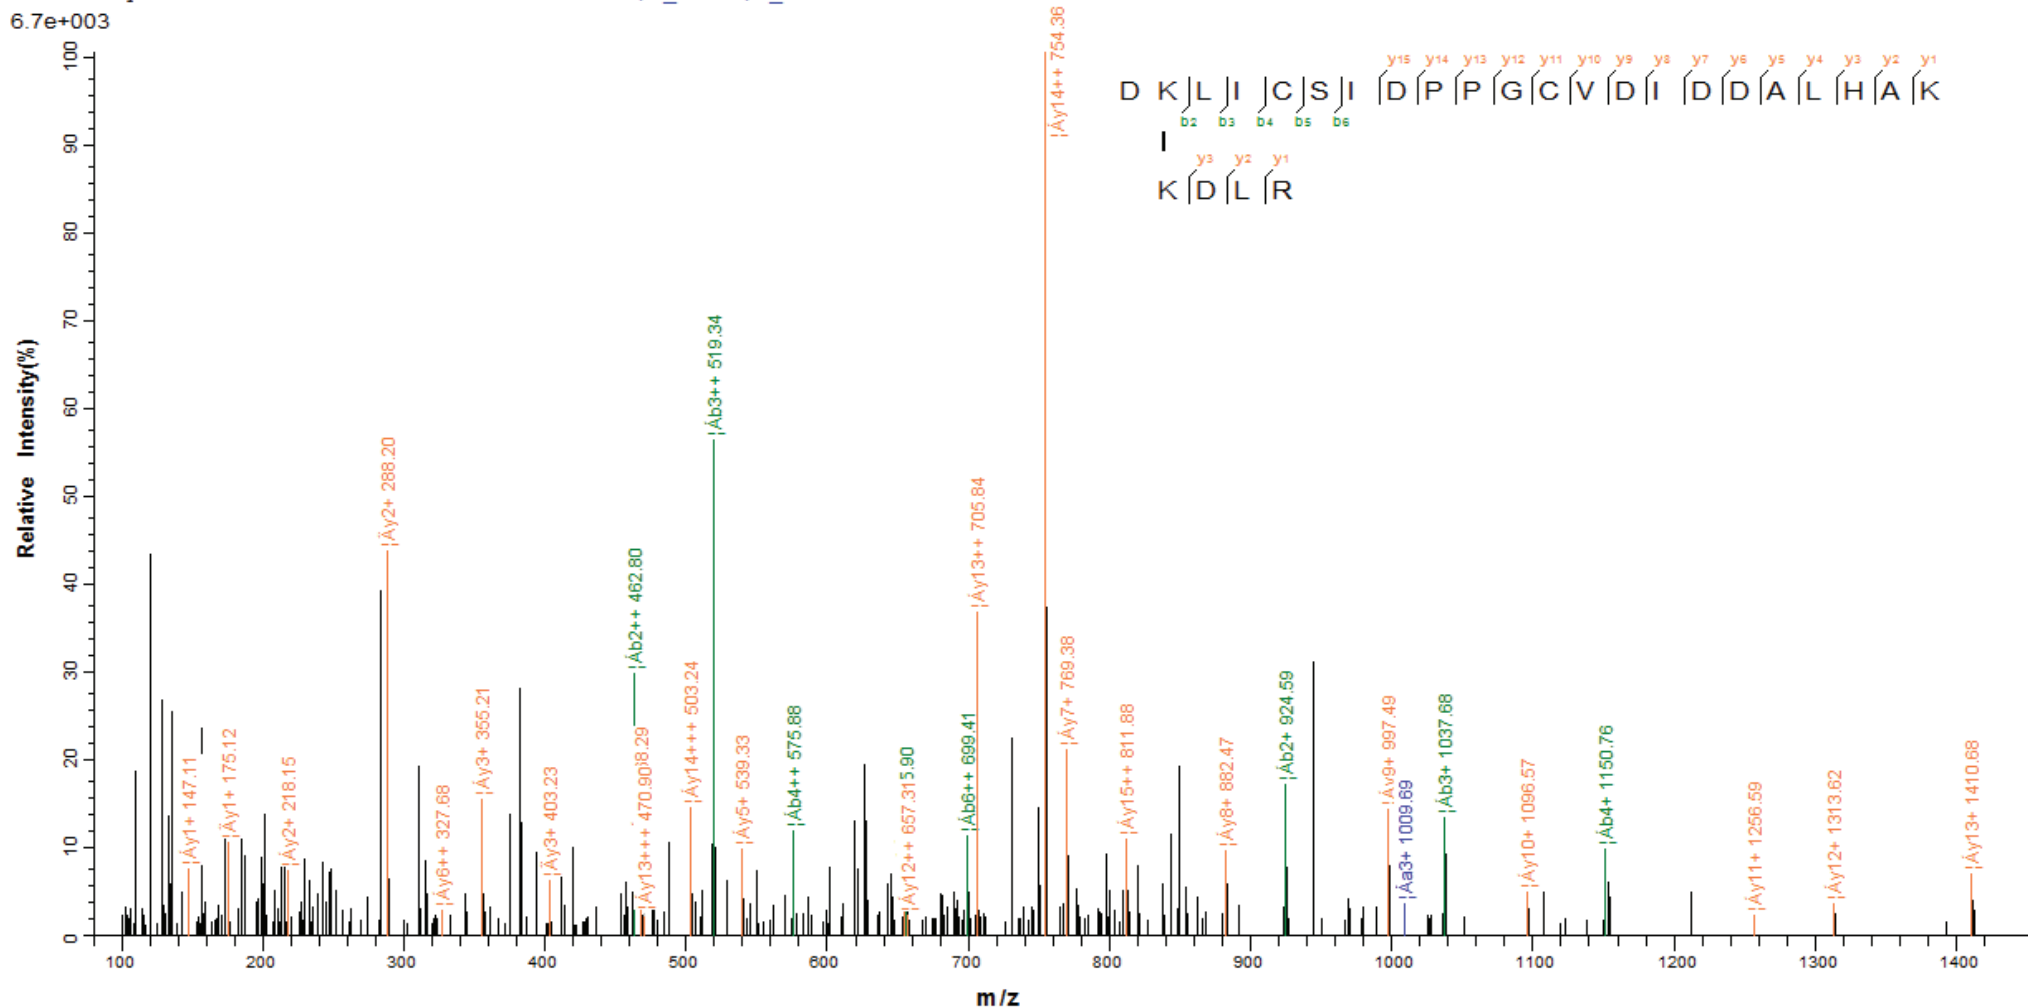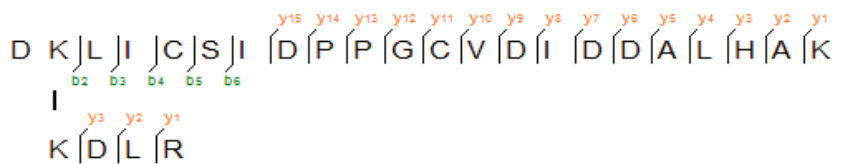

Seq: LICSIDPPGCVDIDALHAKK-KDLR Mod: 3,C\_57 10,C\_57

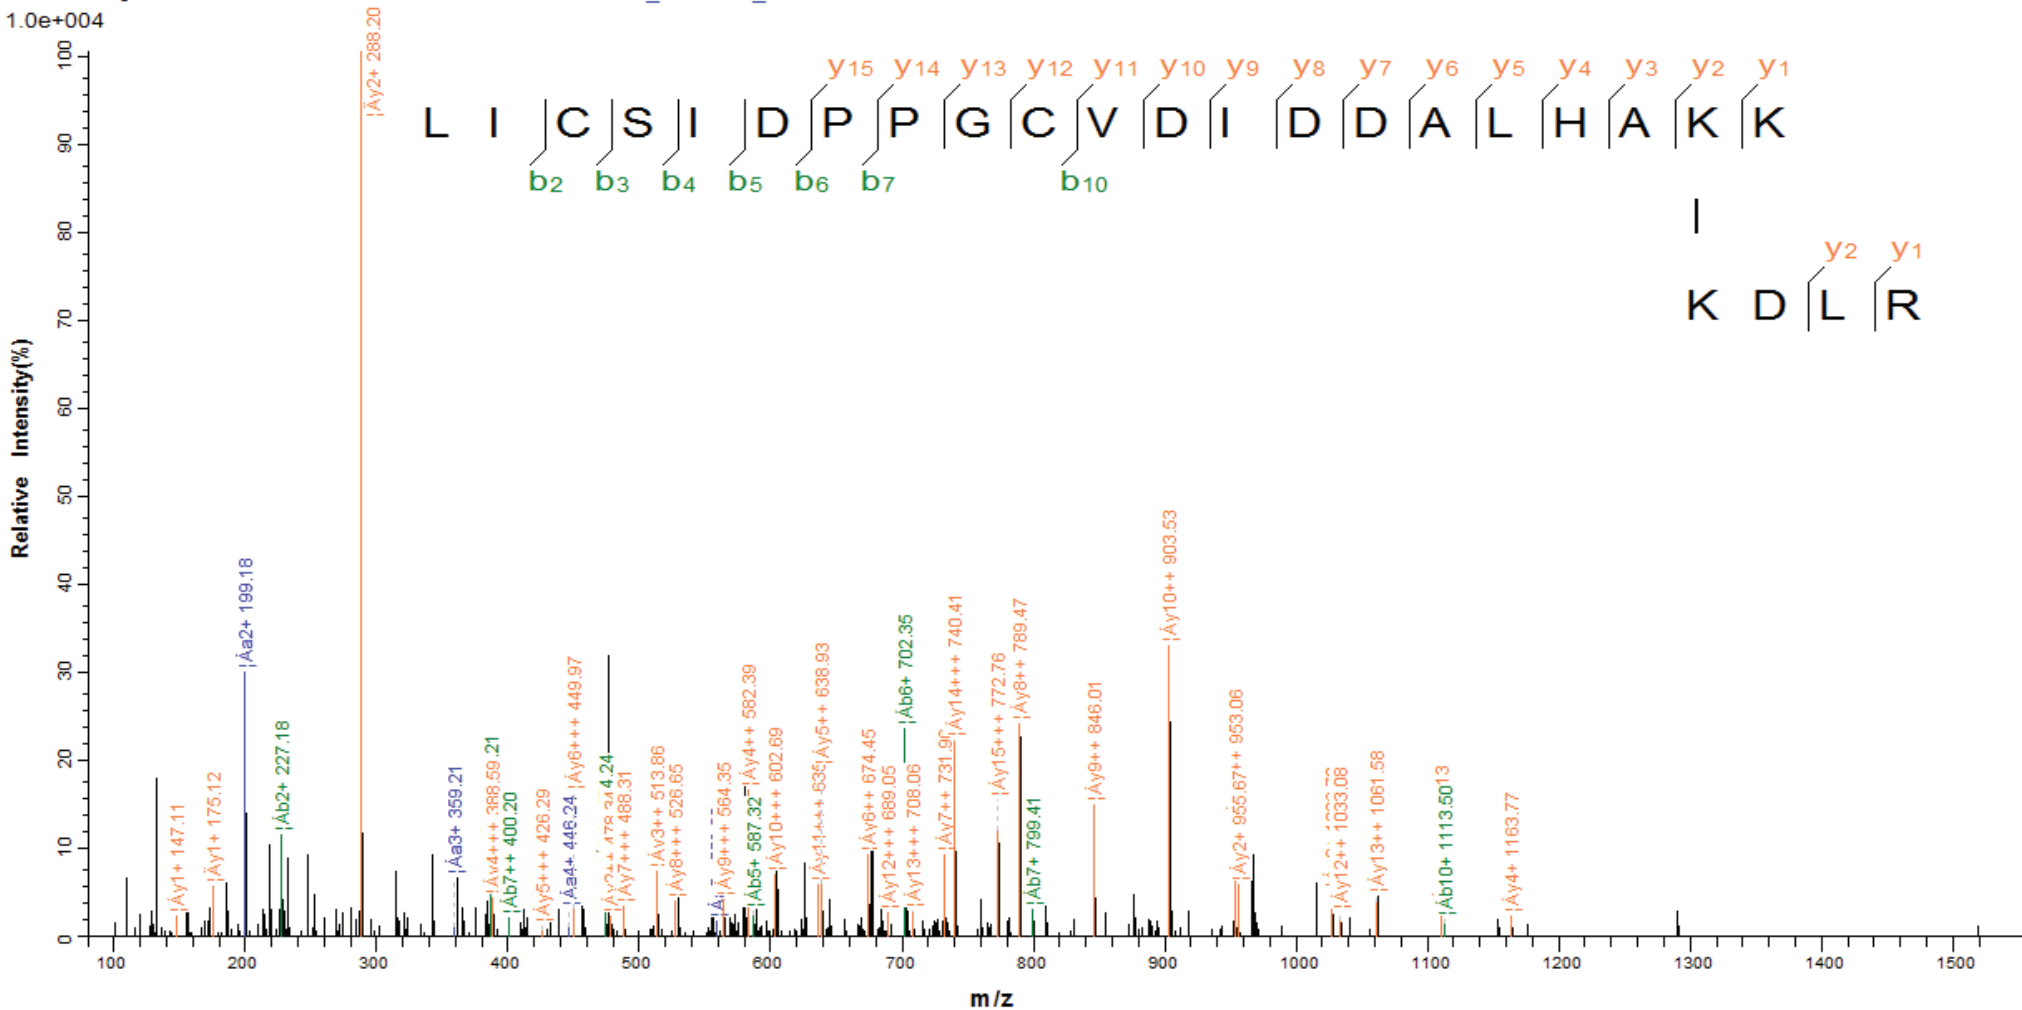

exosome\_A8\_1.001711.001711.5.dta Seq: SKSSHKNER-FSKFER

4.9e+003

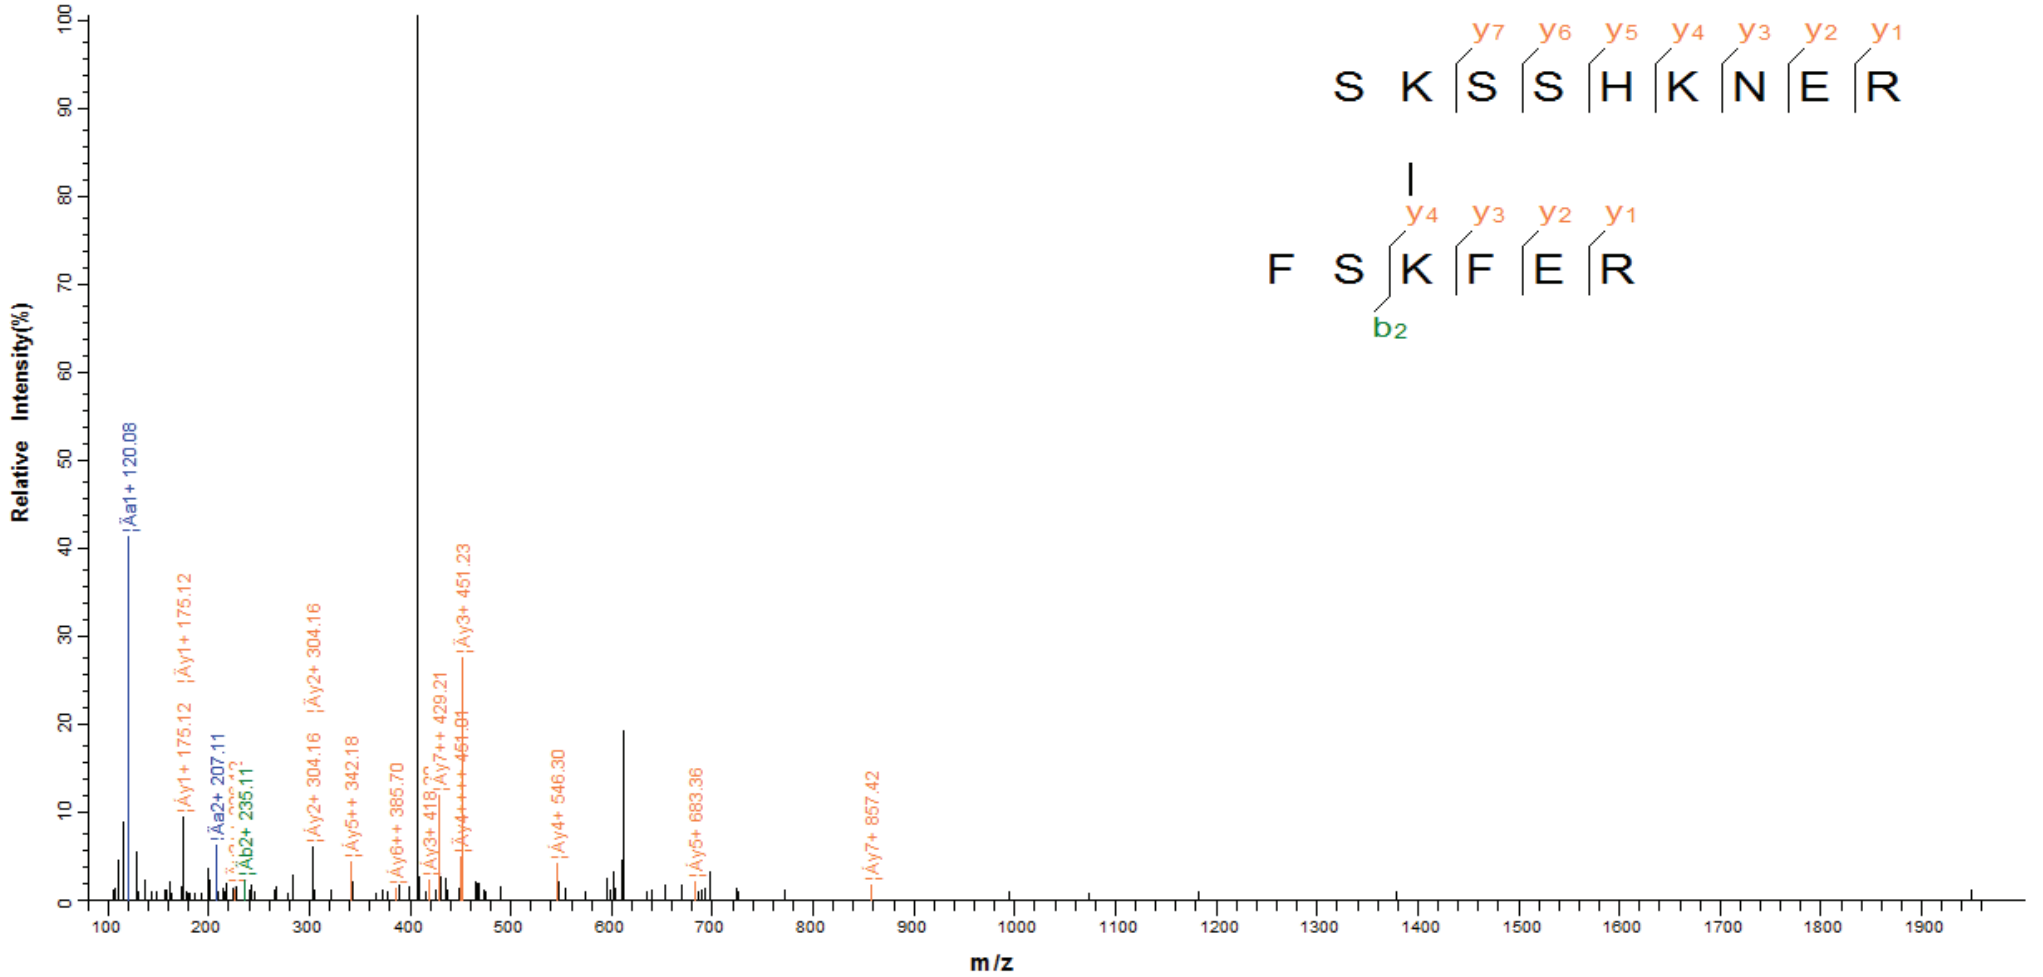

exosome\_A9\_140503145423.3990.3990.4.dta Seq: GTSVYLVDKR-SVMDPITSKR

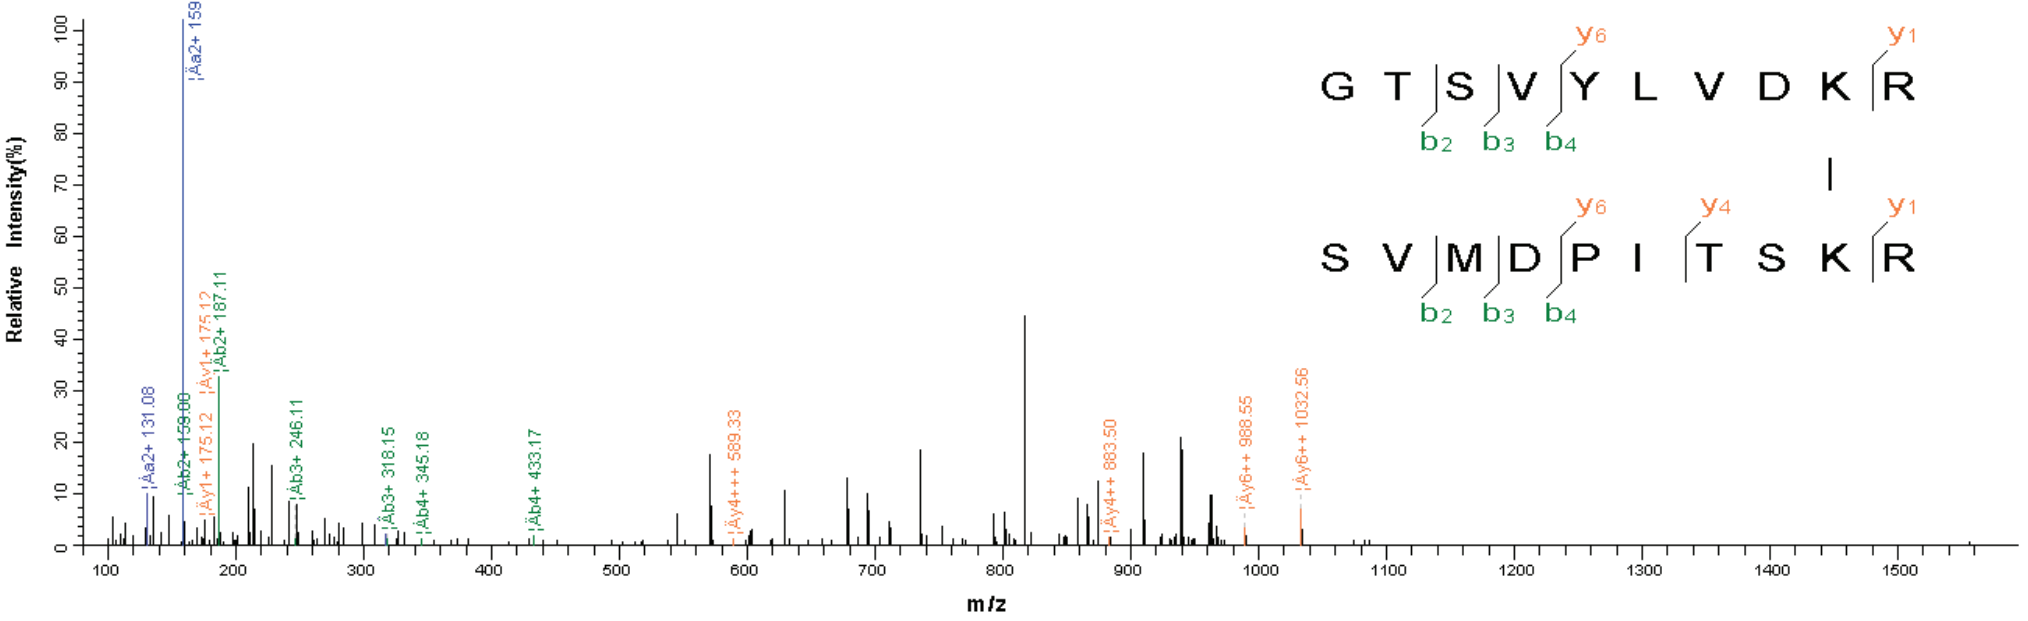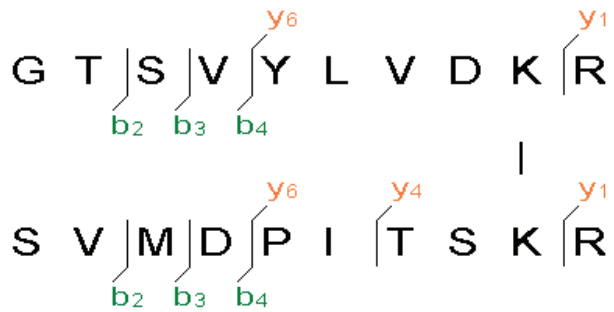

Seq: IDDKTQNDLTMGMR-ALLKLSVK Mod: 12, Oxidation\_M\_15.995 14, Oxidation\_M\_15.995

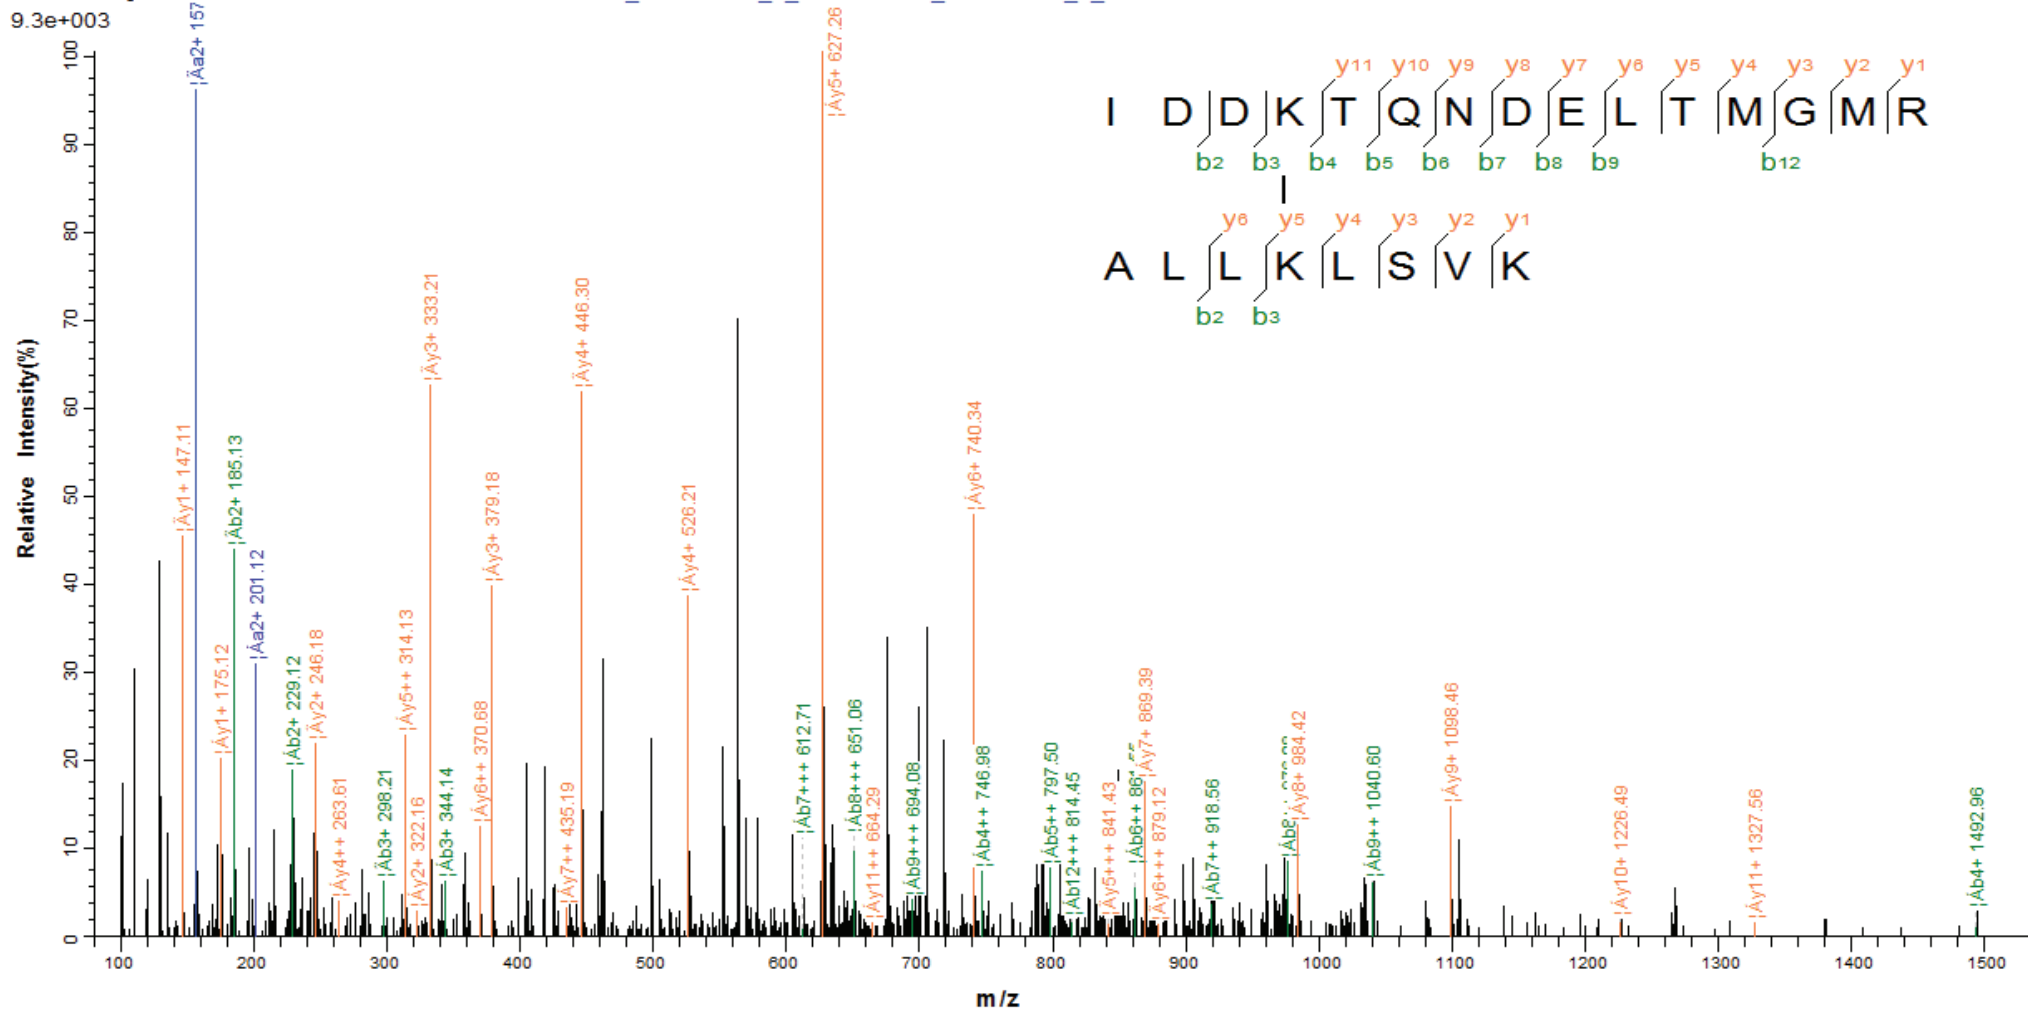

exosome\_A9\_140503145423.2873.2873.4.dta Seq: IDDKTQNDDELTMGMRLKQK

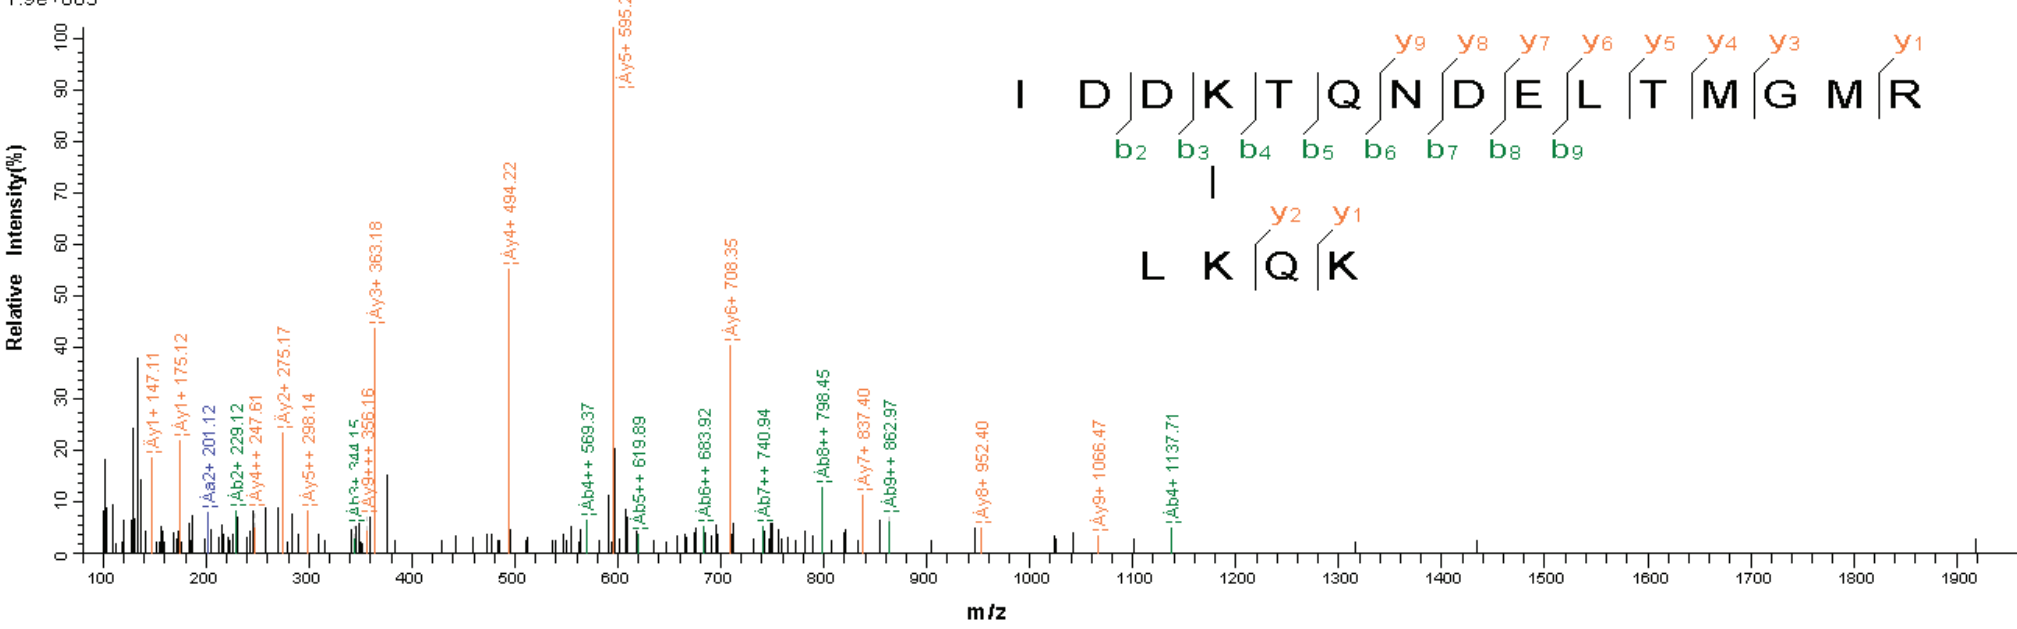



Seq: VHMDSETSDPNEVEIKK-LKQK Mod: 3,\_Oxidation\_M\_15.995

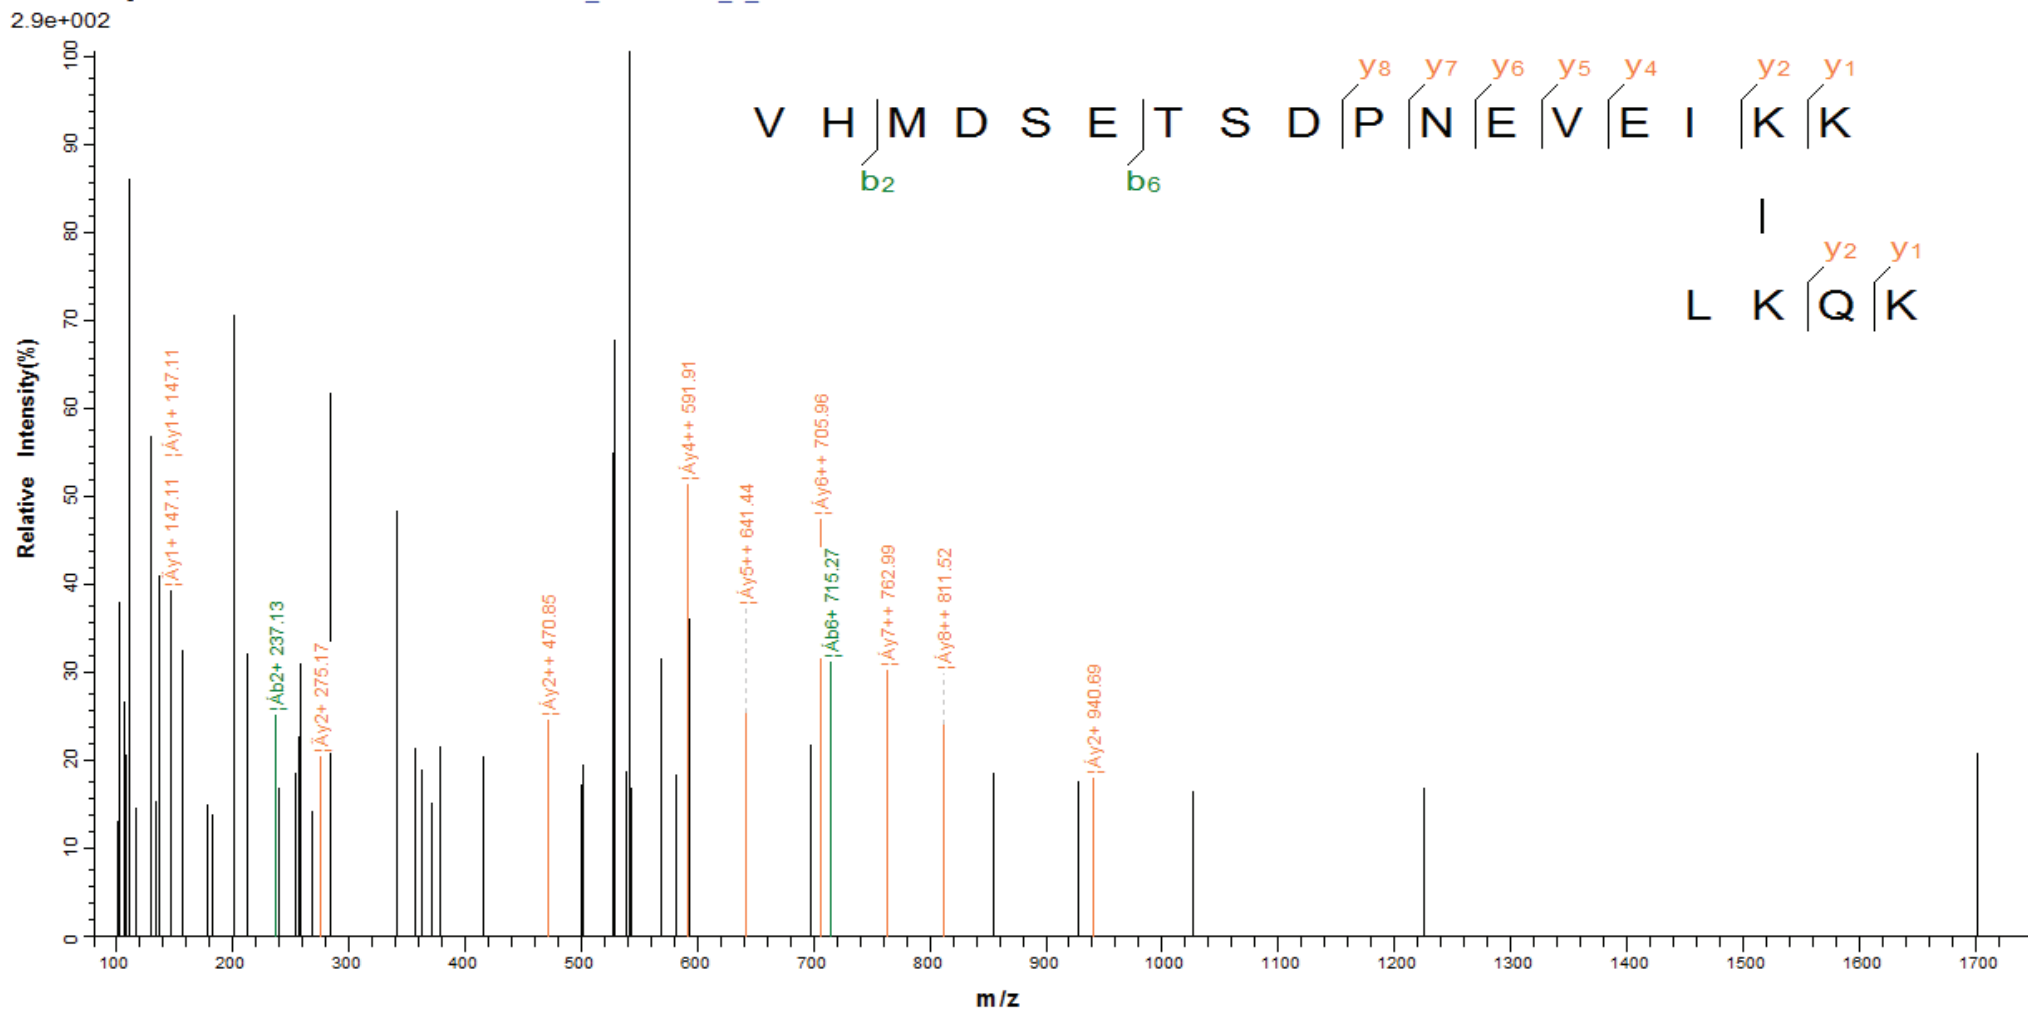

Seq: KLLATNSLVEEFMLLANISVAR-LKQK

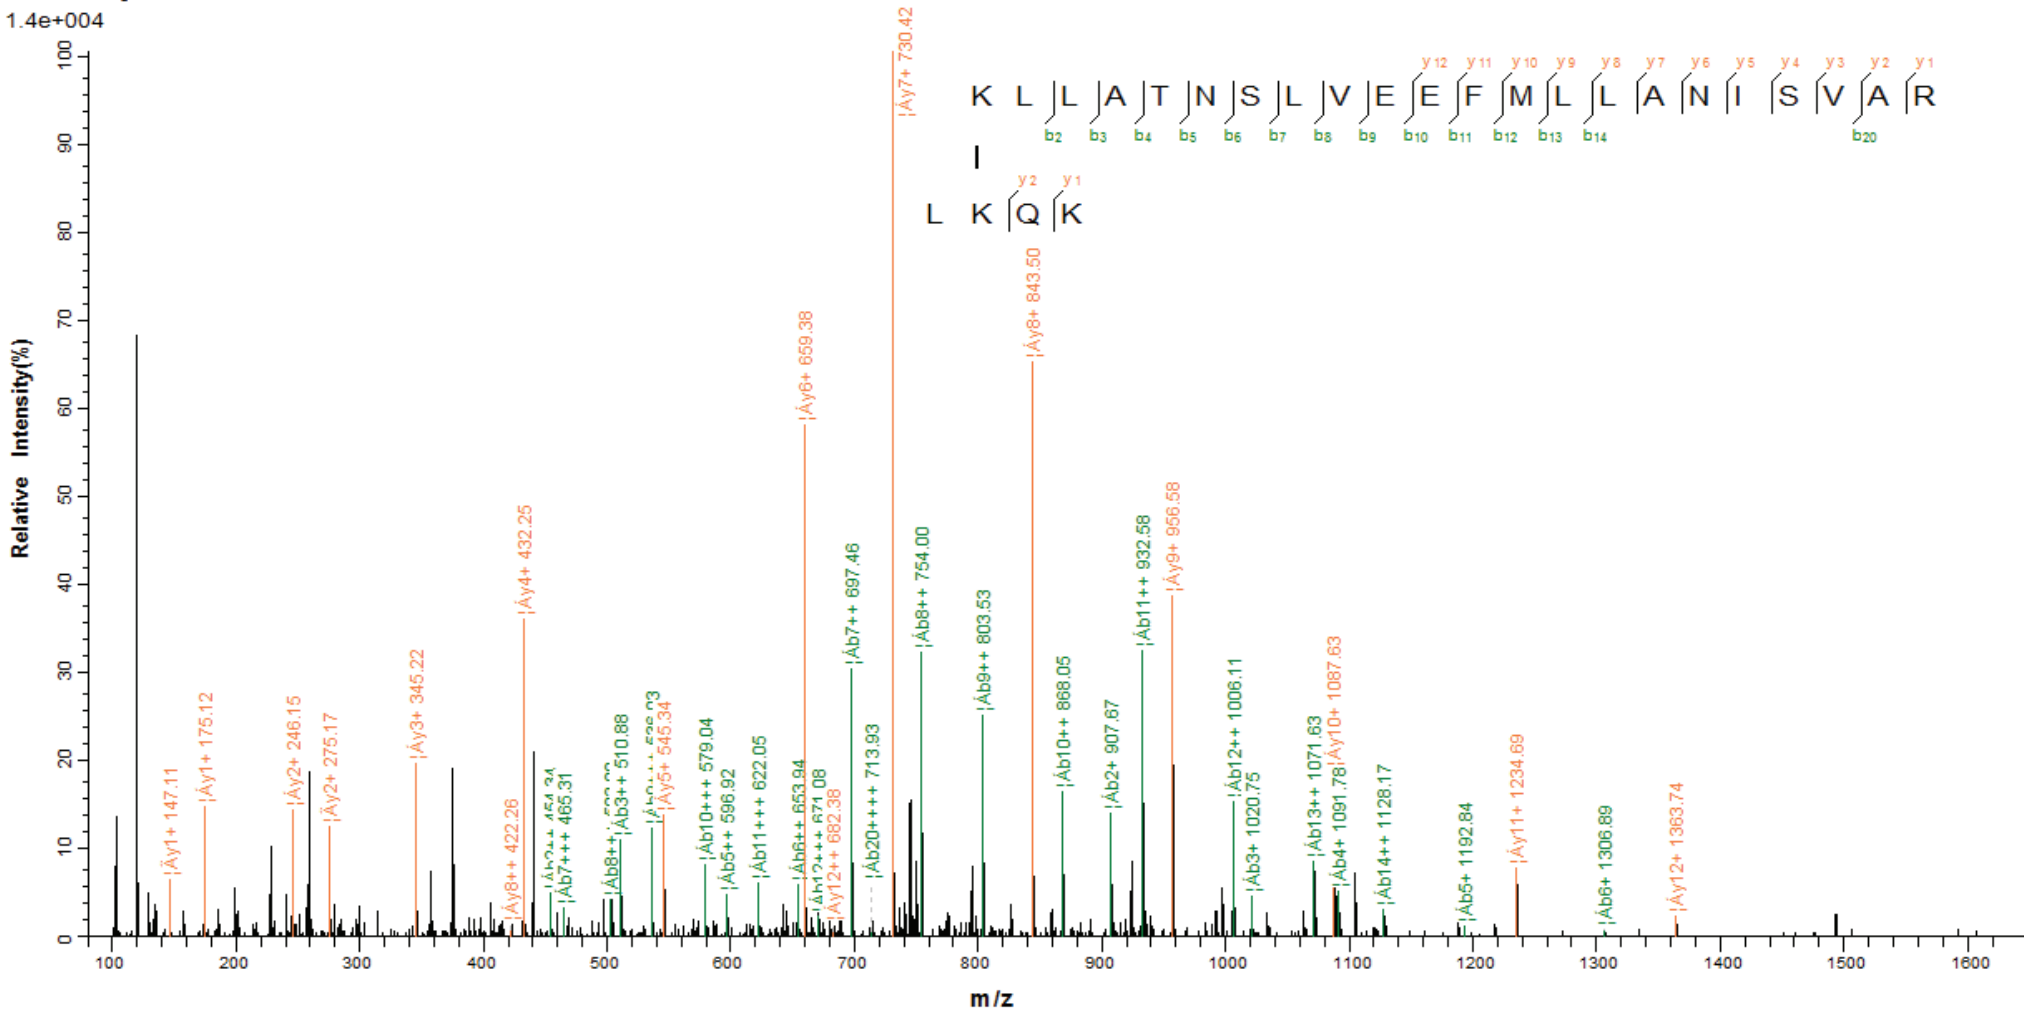

Seq: KIYDAFPQTAMLR-DPLLTKR Mod: 11,\_Oxidation\_M\_15.995

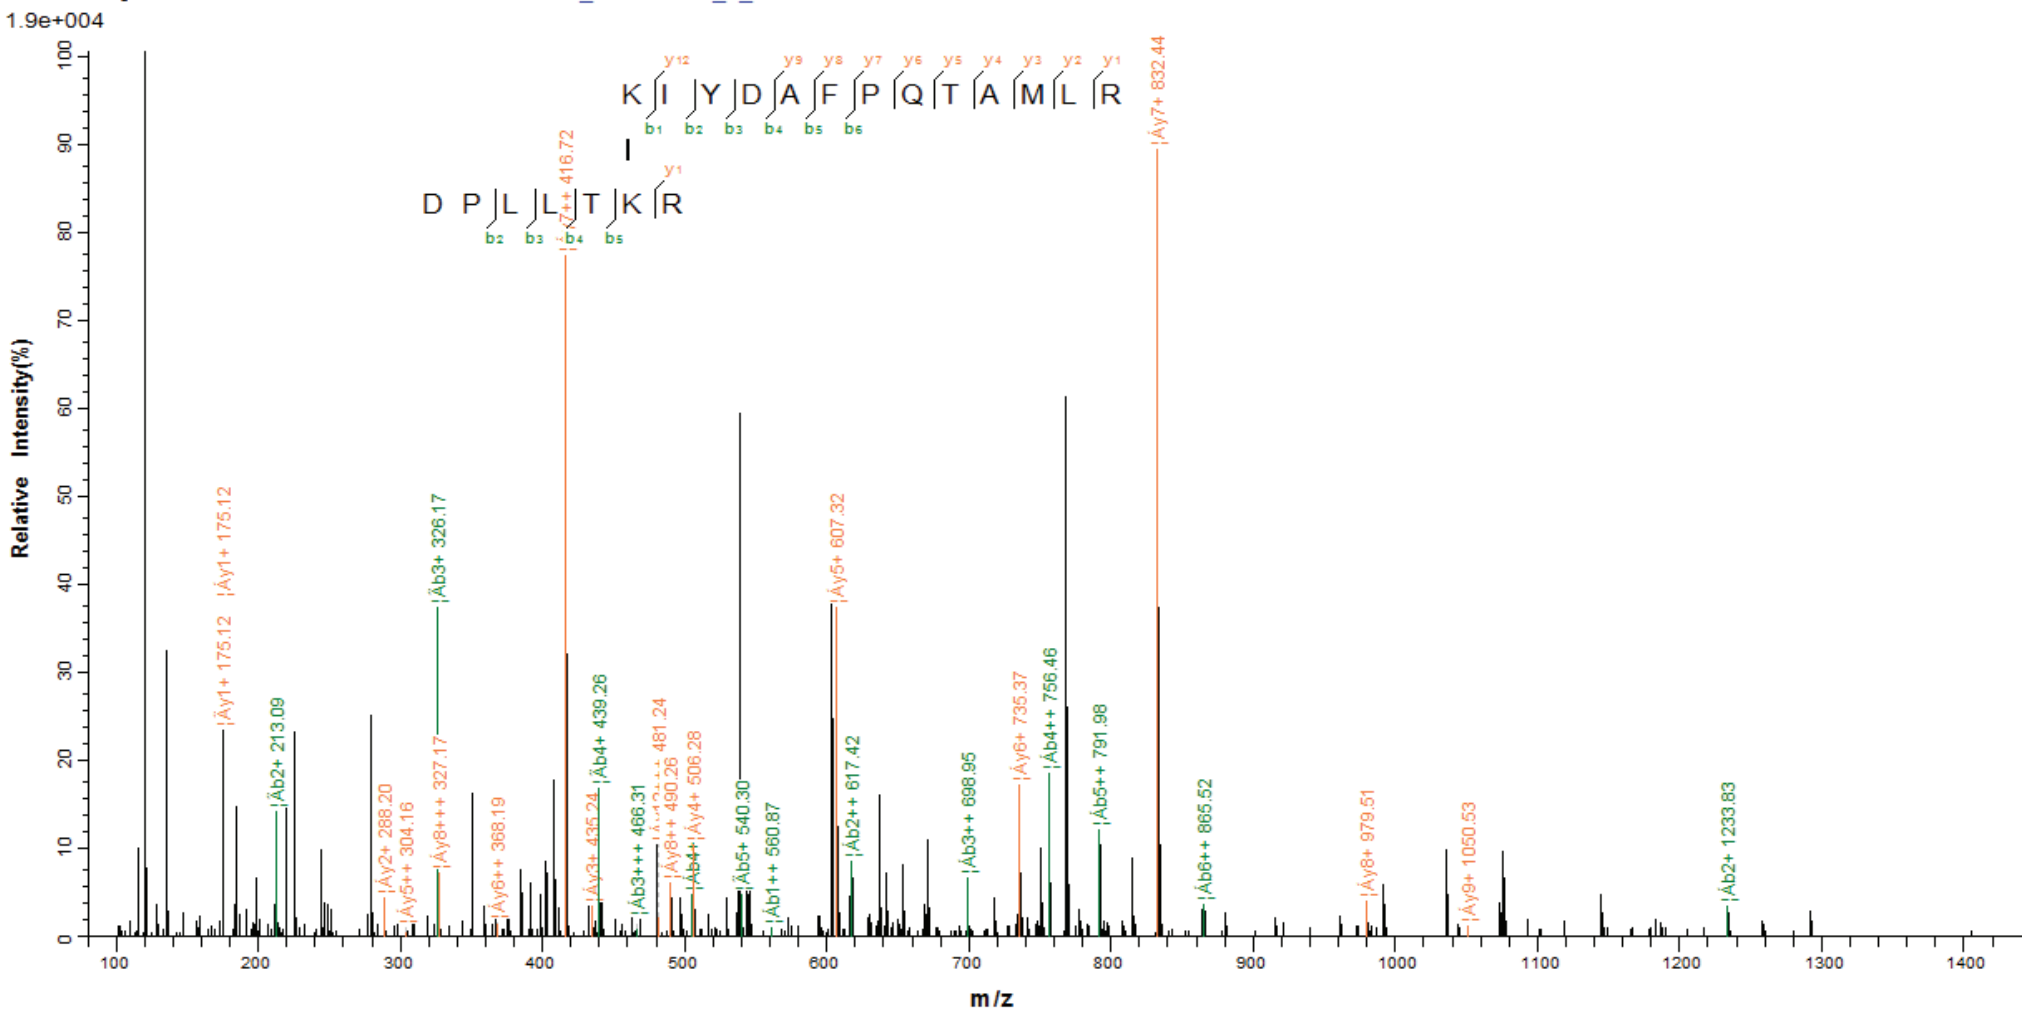

Seq: KIYDAFPQTAMLR-RKDLR Mod: 11, Oxidation\_M\_15.995

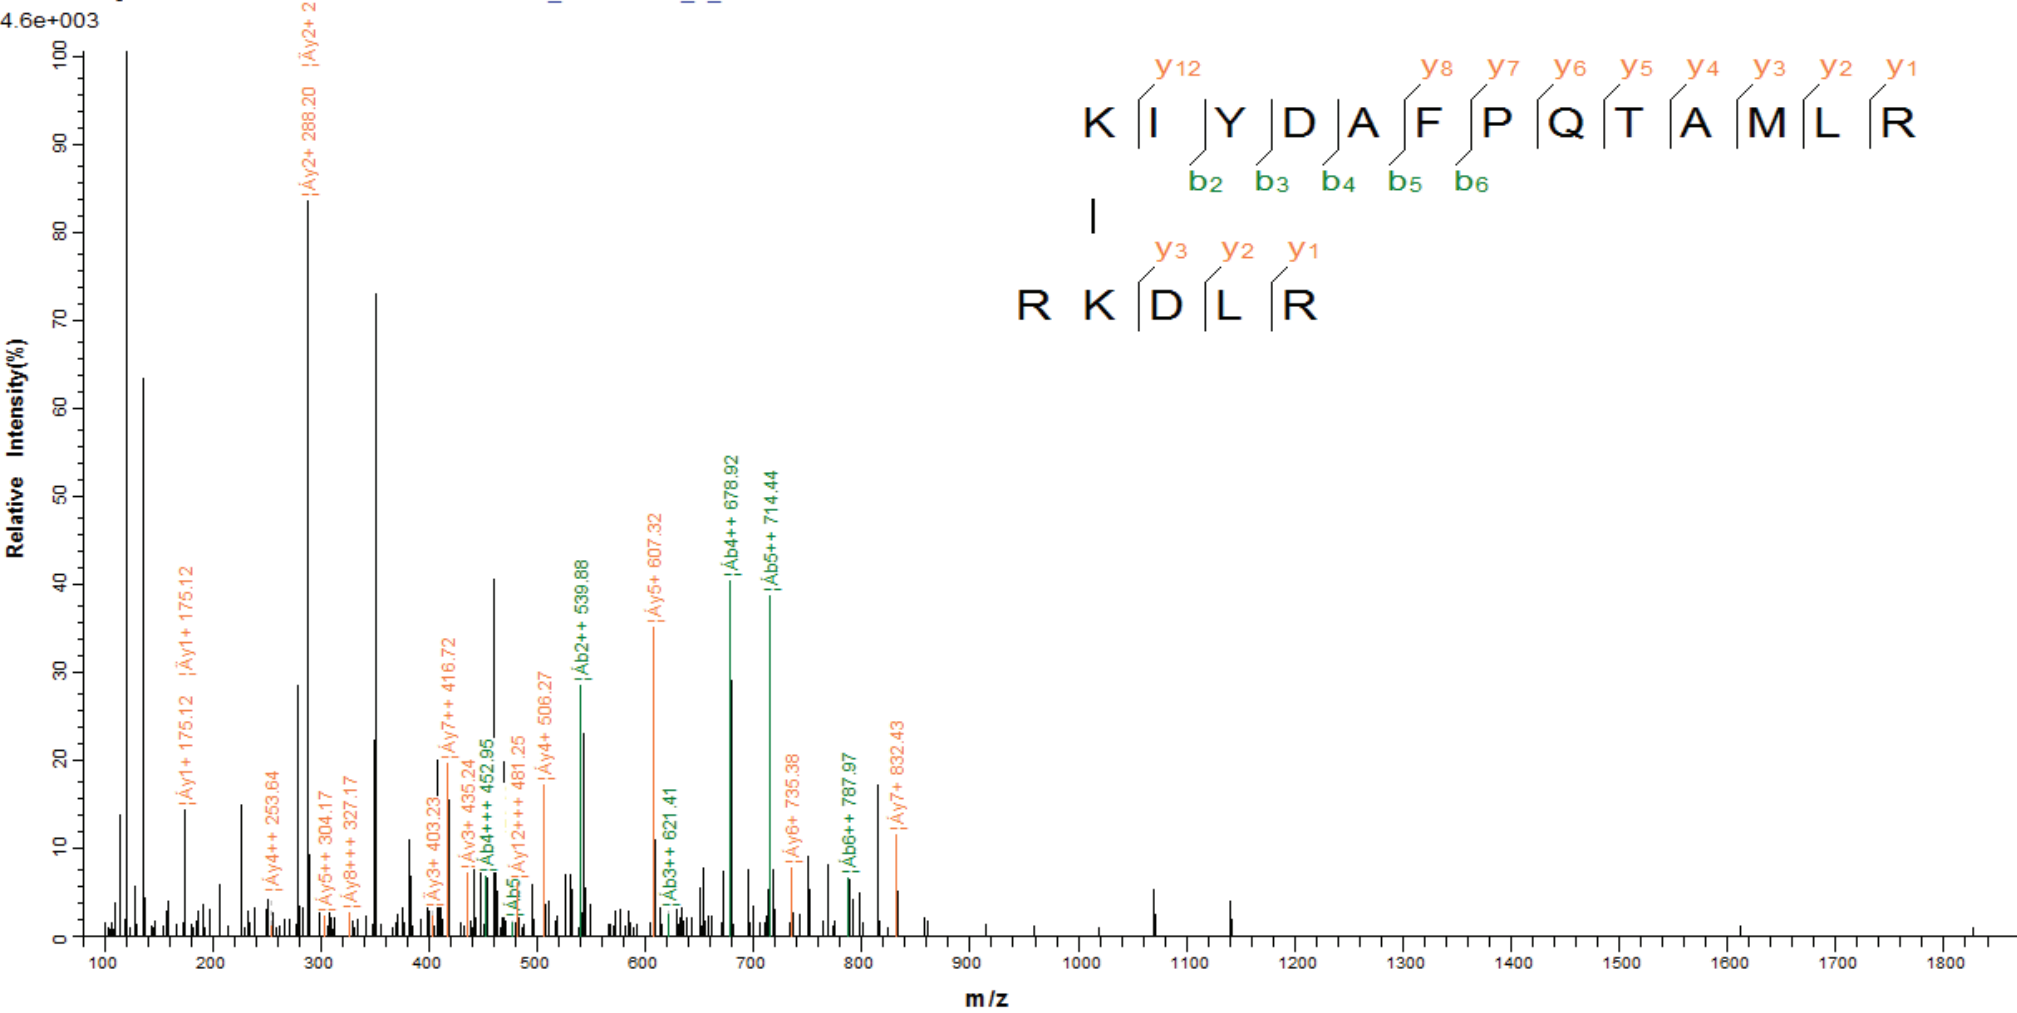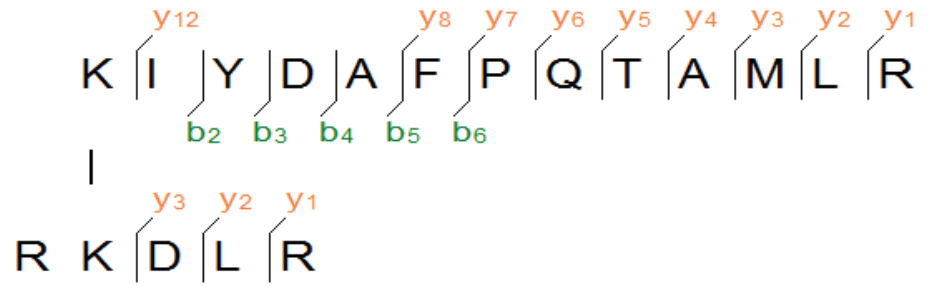

Seq: NNESTETGYVIKVFNNGIIVLVLPK-FSKPVLIVGQK

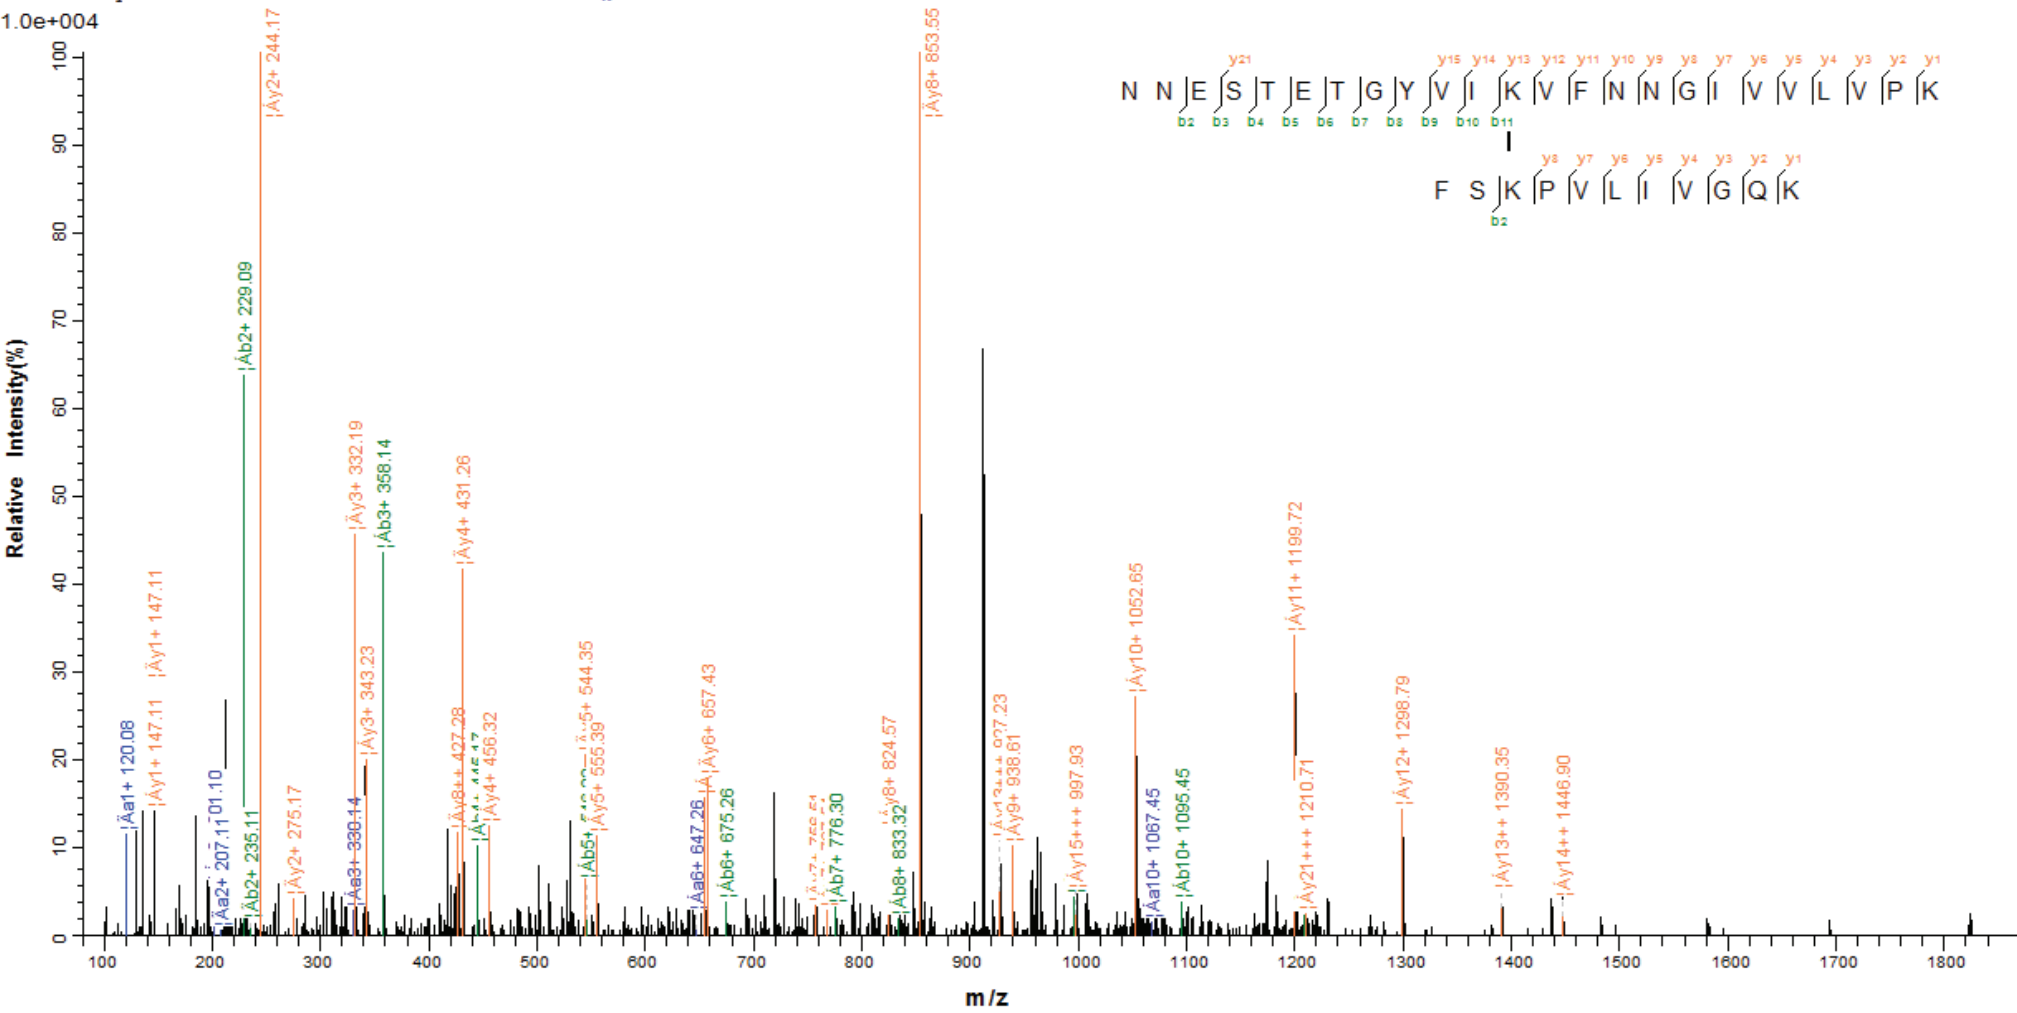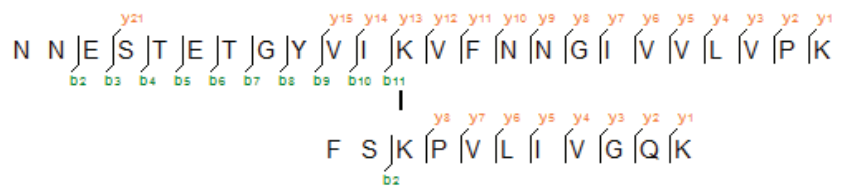

Seq: NNESTETGYVIKVFNNGIVLVPK-KIQPTAK

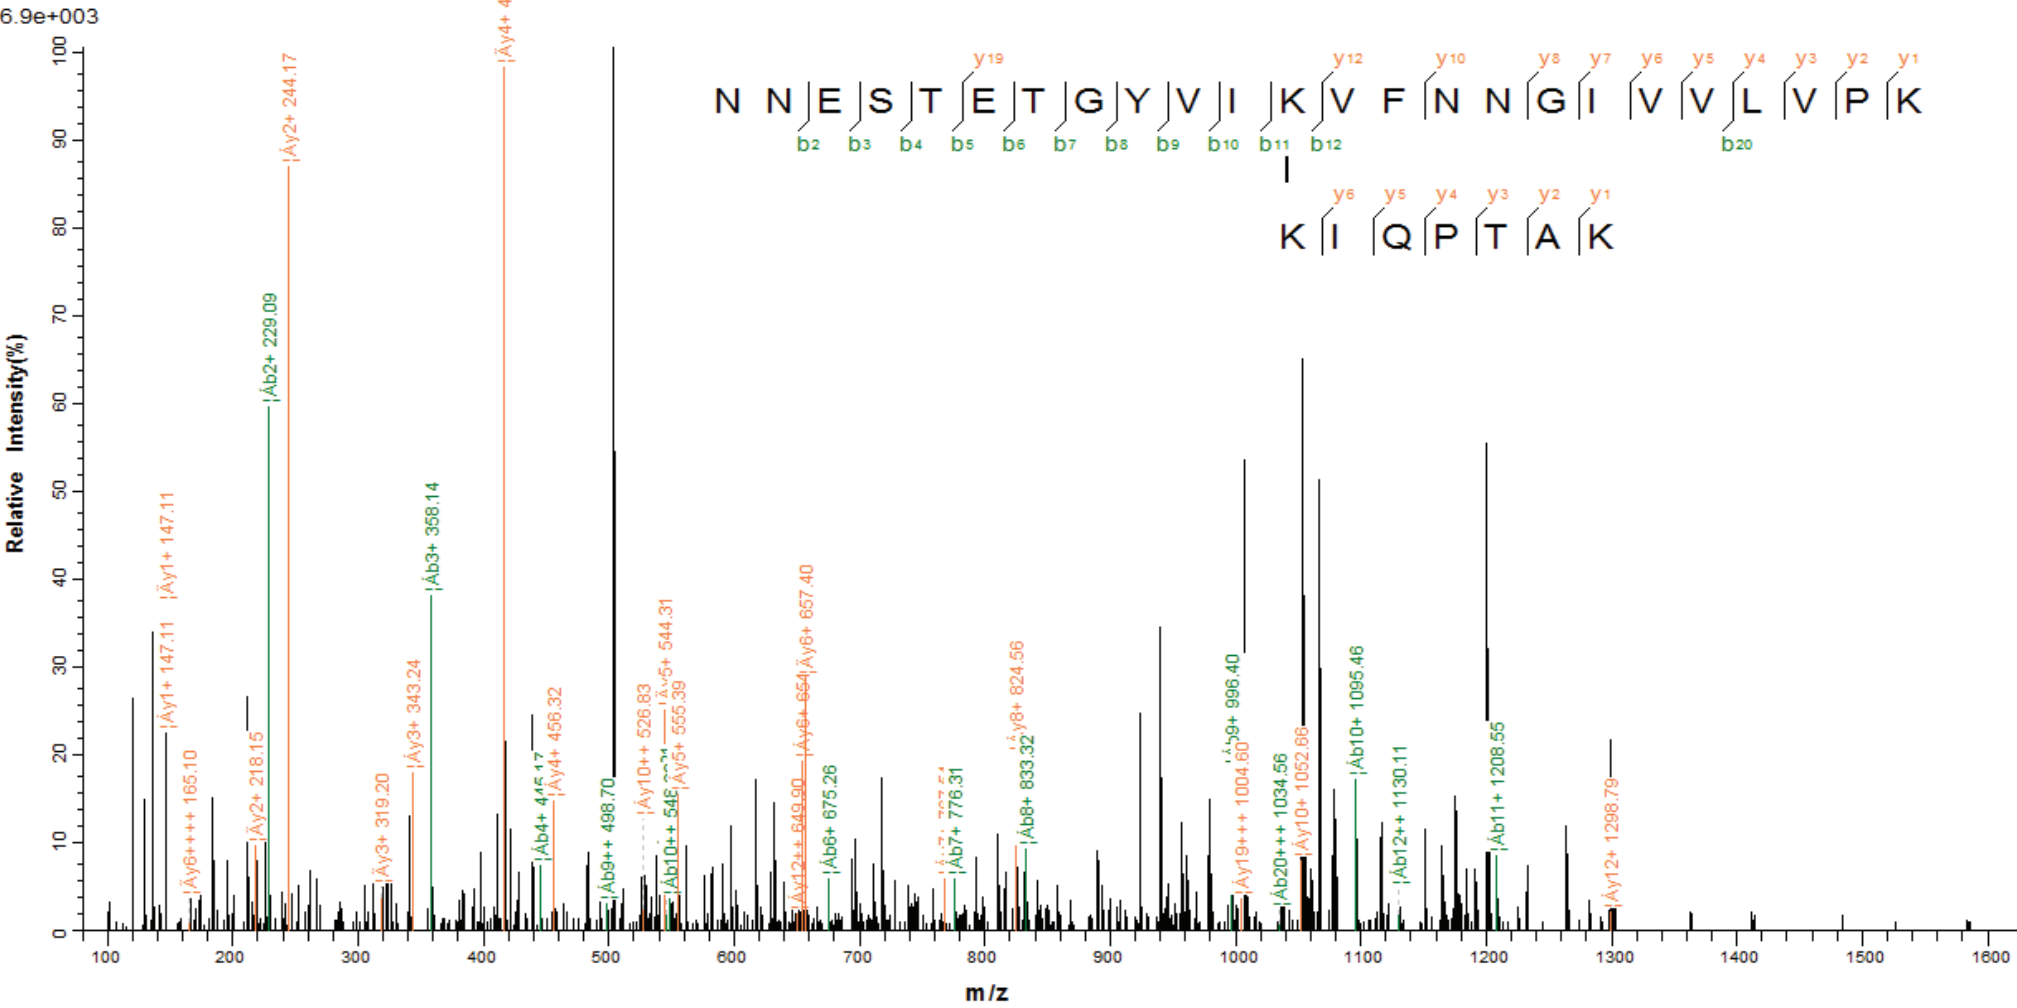

Seq: LTFVPTNSDKPRLK

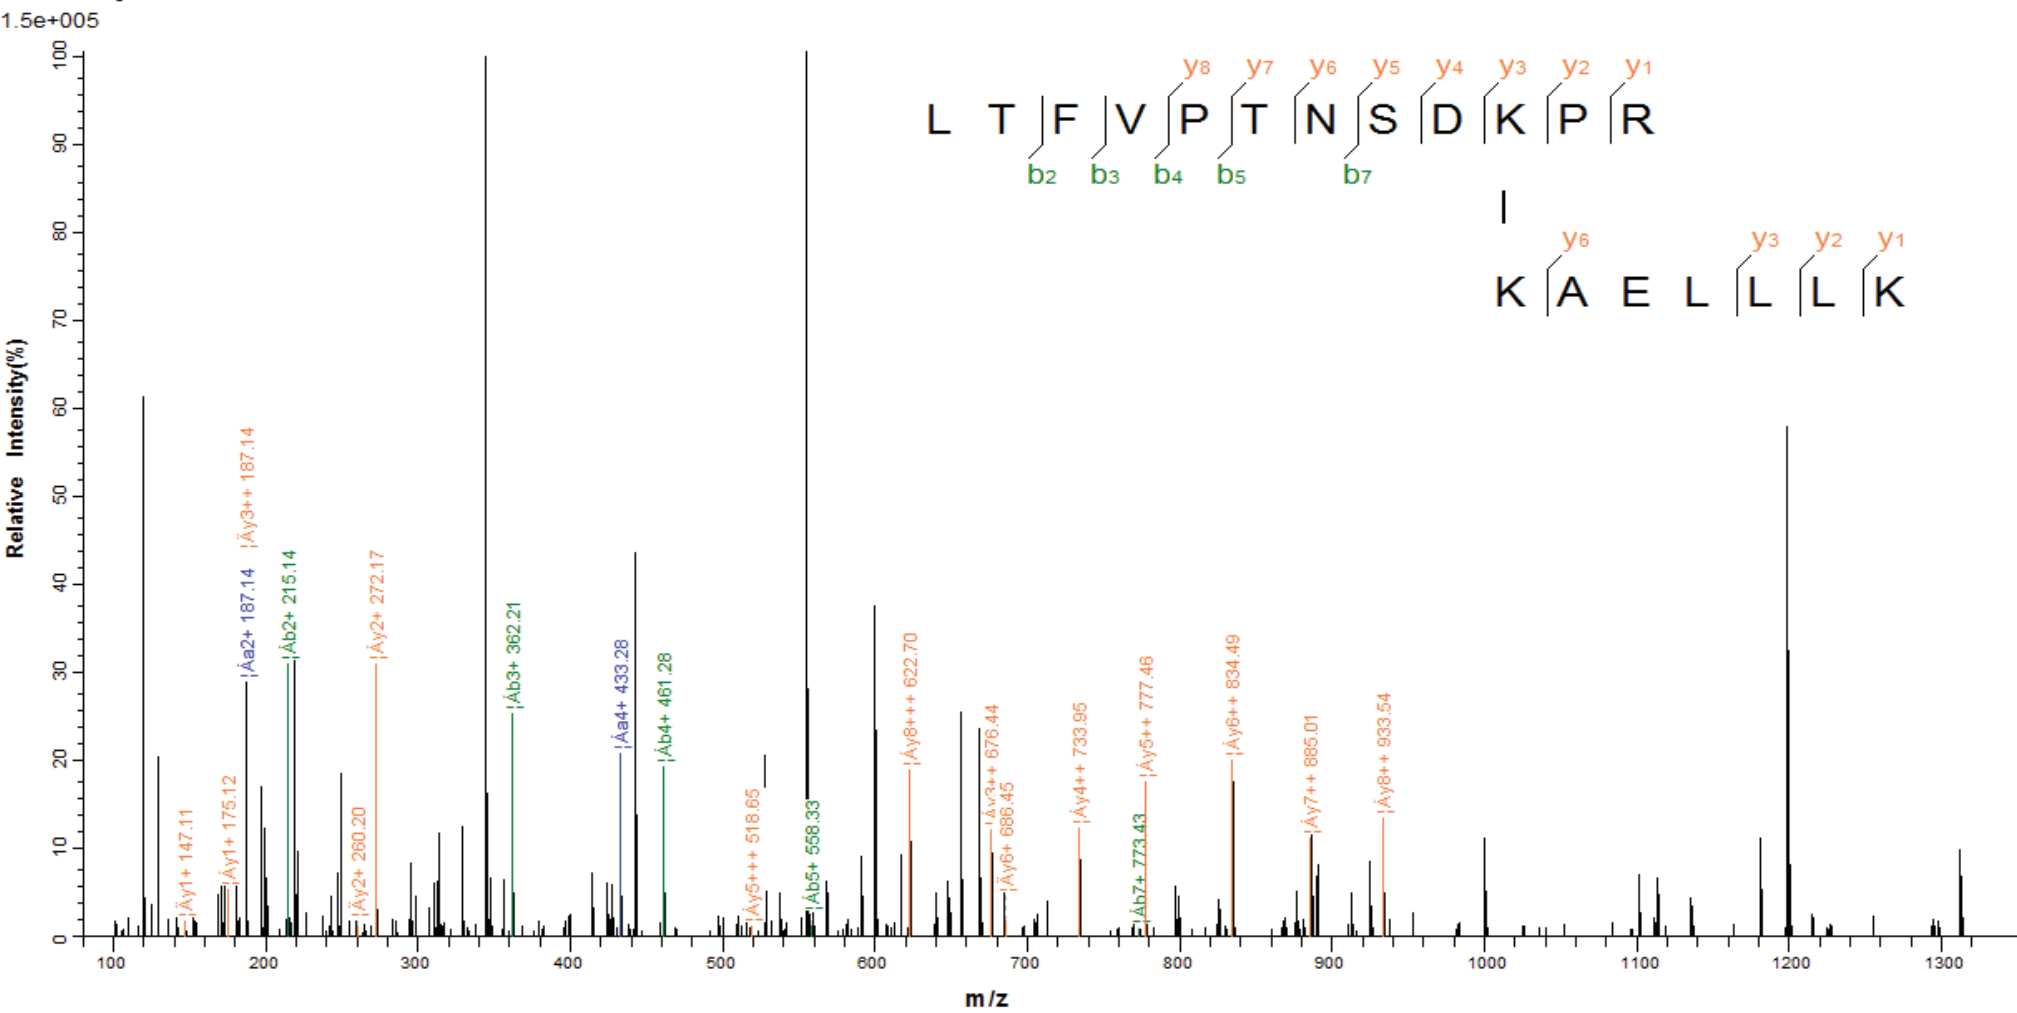

exosome\_A8\_140503145423.3801.3801.4.dta Seq: LTFVPTNSDKP|K|P|R

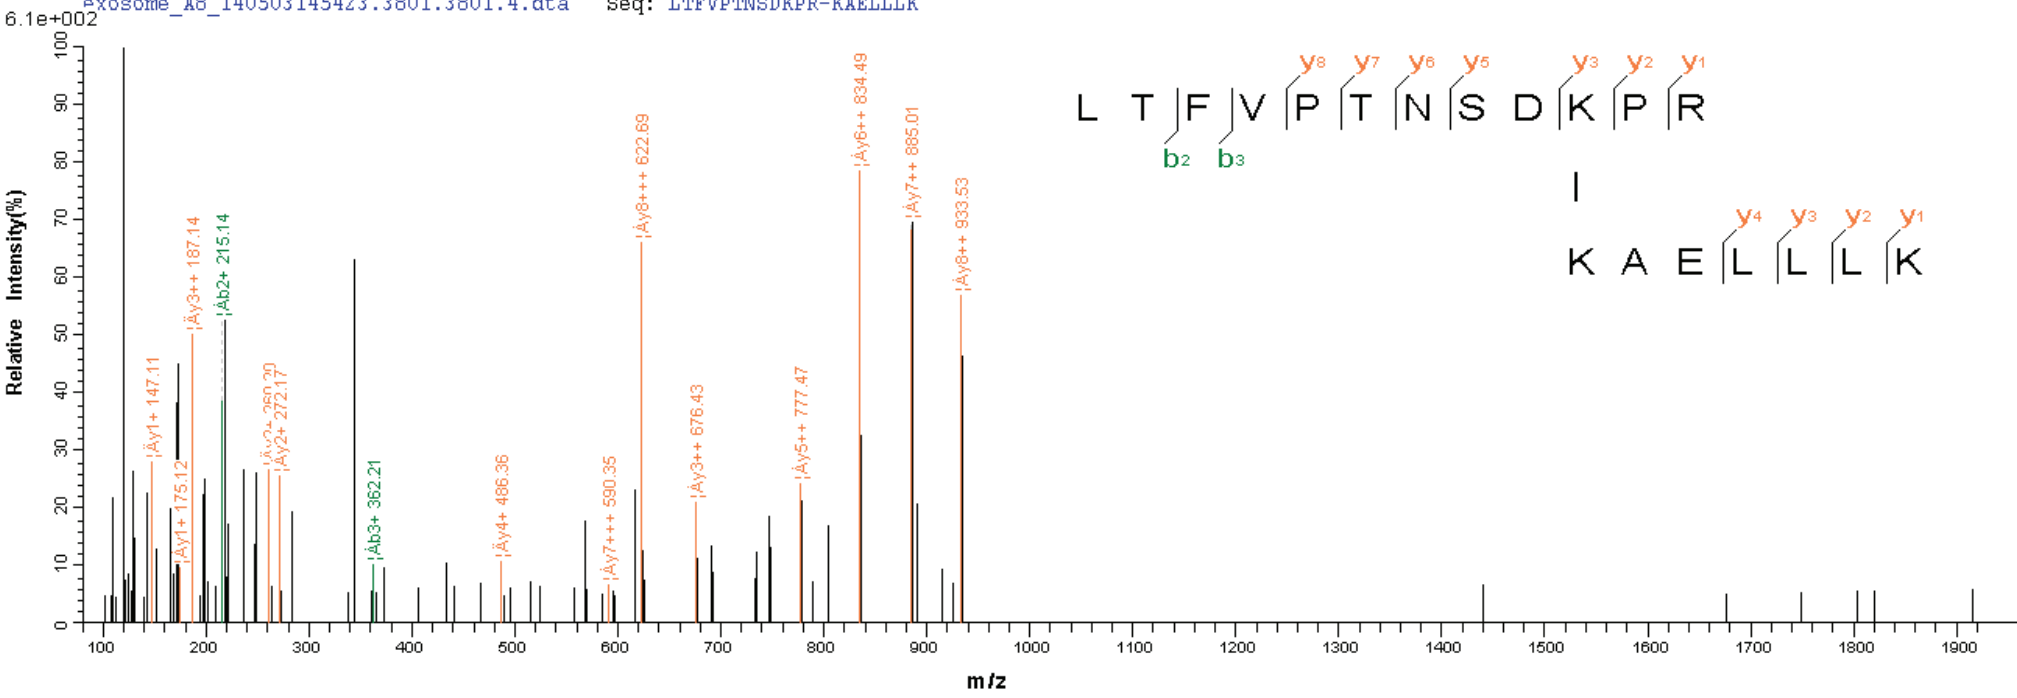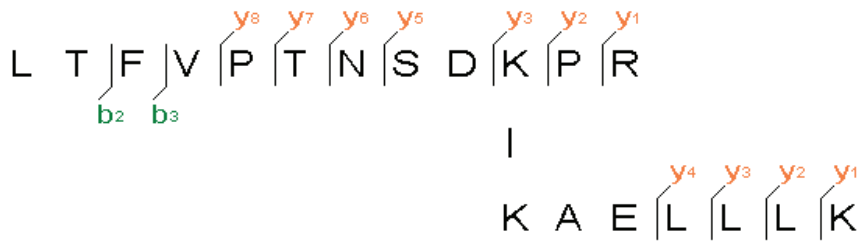



Seq: SVMDPITSKR-KAELLLK

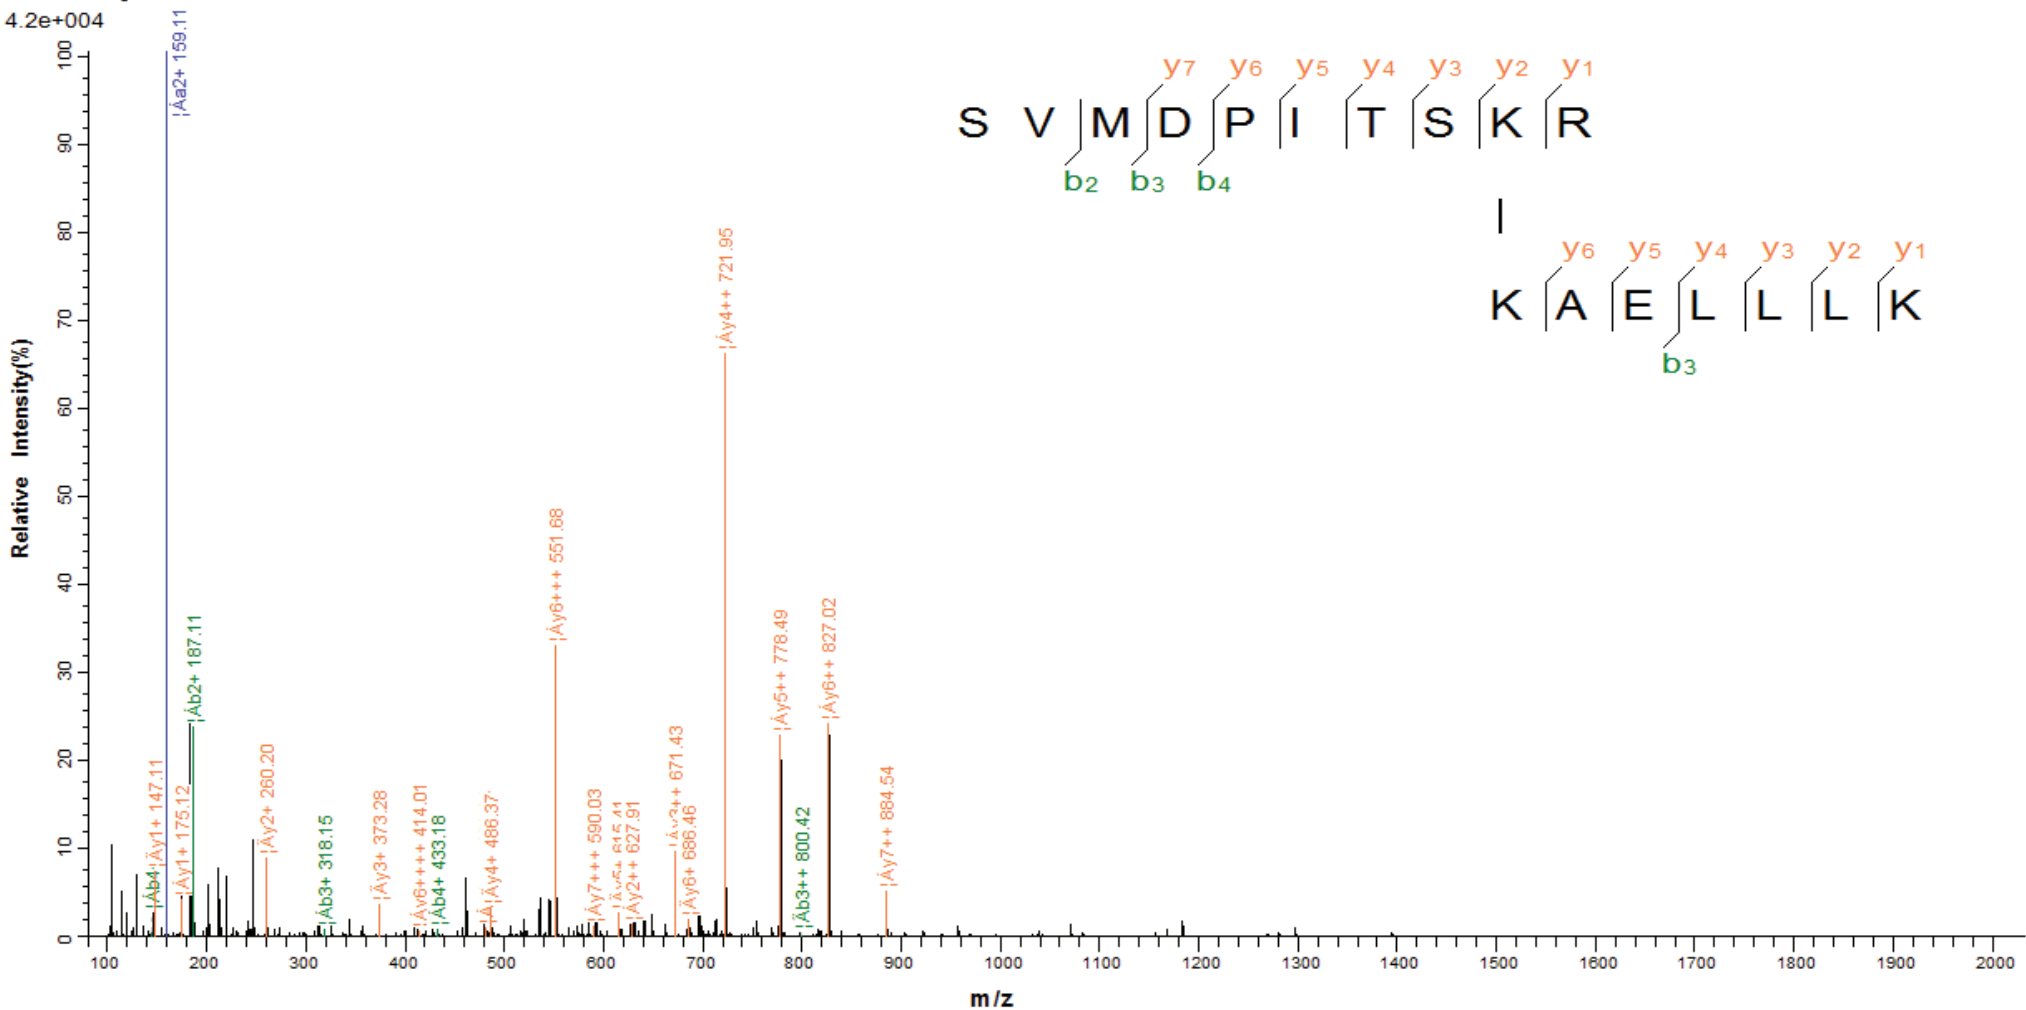

exosome\_A9\_140503145423.3437.3437.4.dta Seq: SVMDPITSKR-CLPKVR Mod: 14,c\_57

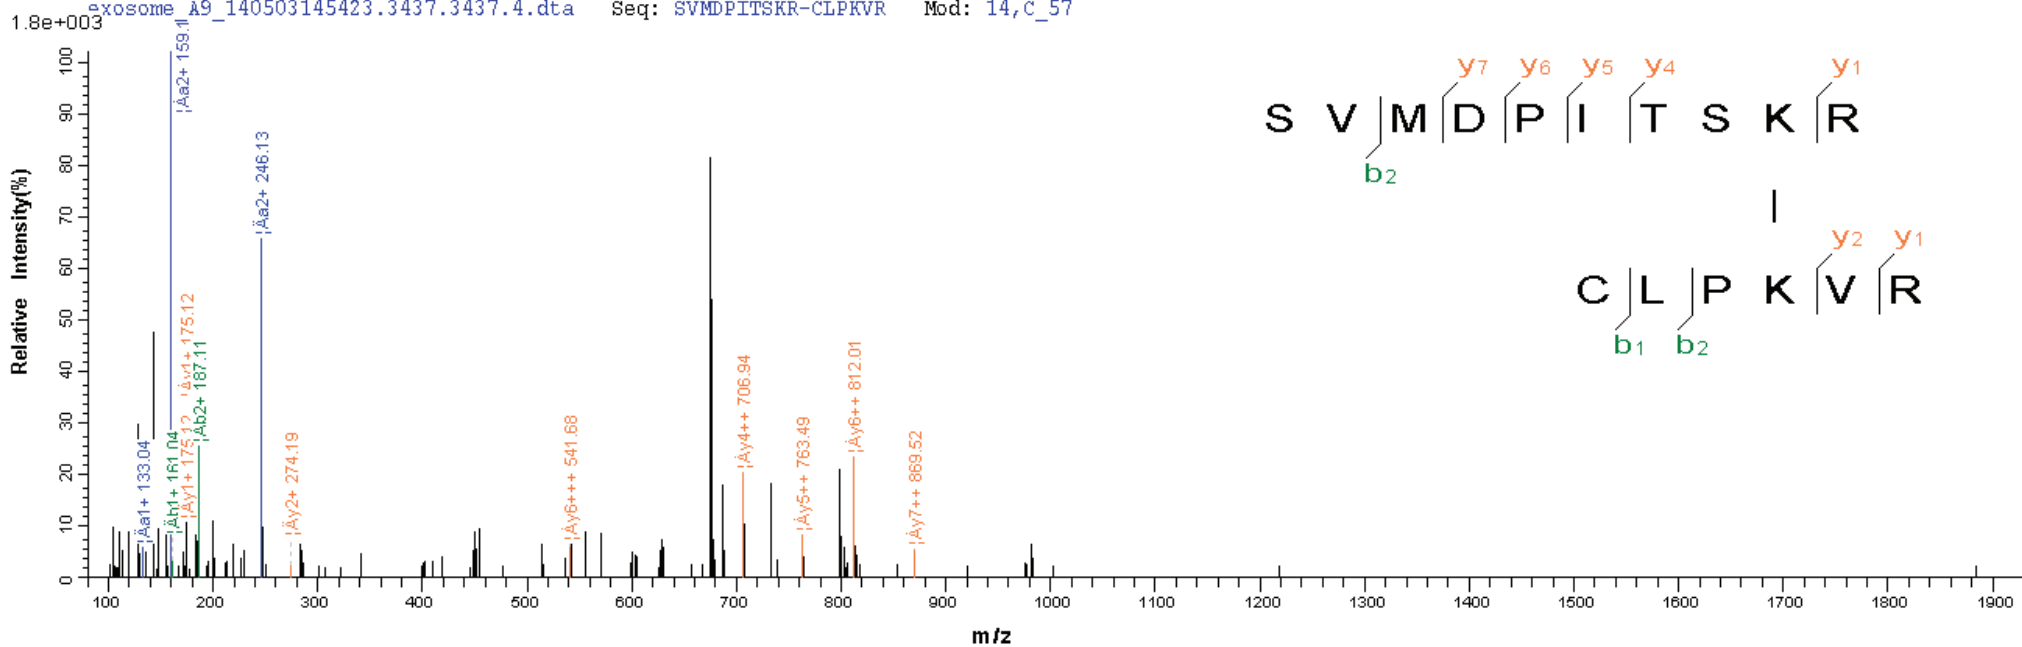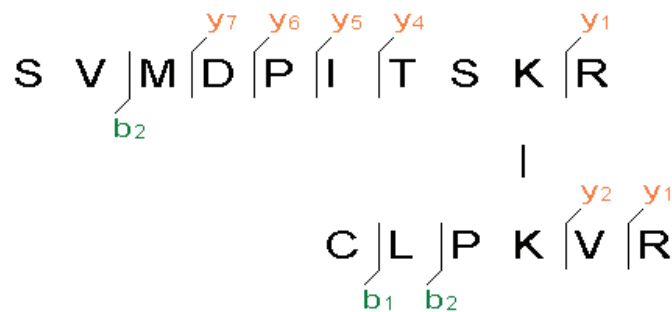

Seq: SVMDPITSKR-AAELLDKR

5.3e+004

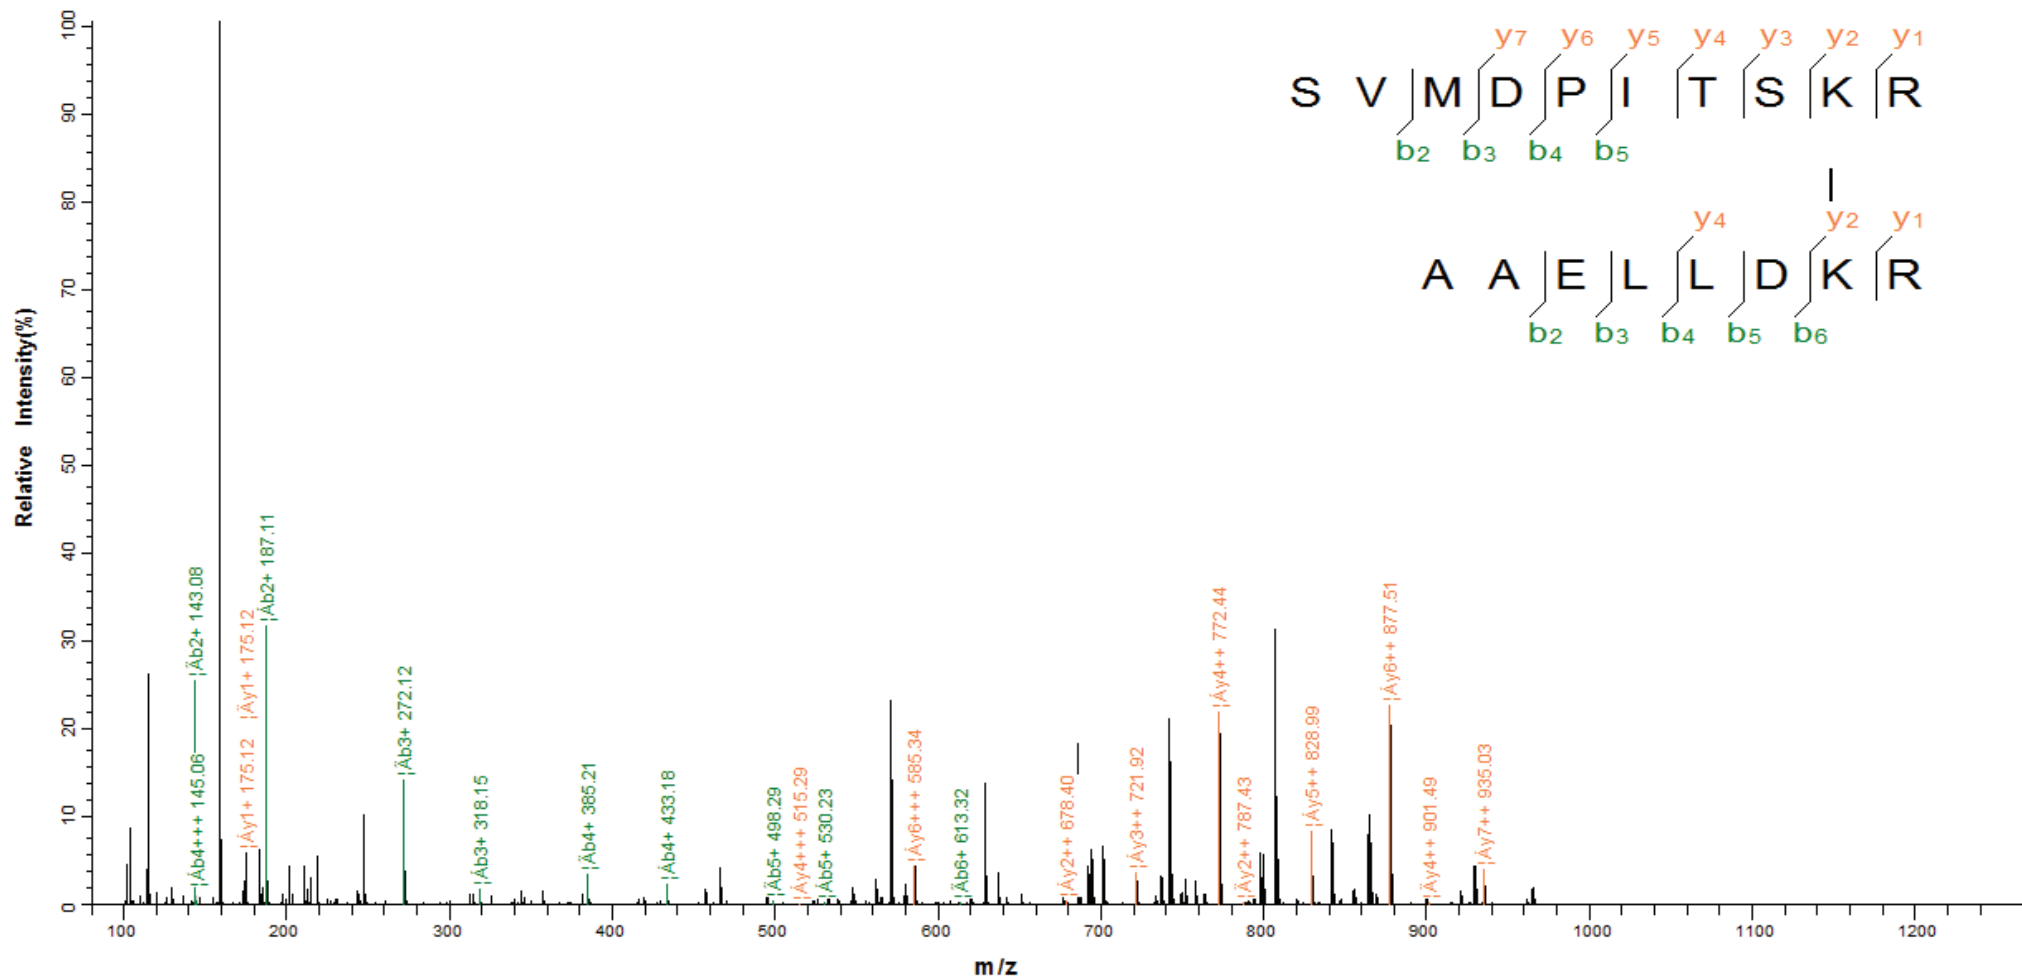

Seq: SVMDPITSKR-KAELLLK Mod: 3, Oxidation\_M\_15.995

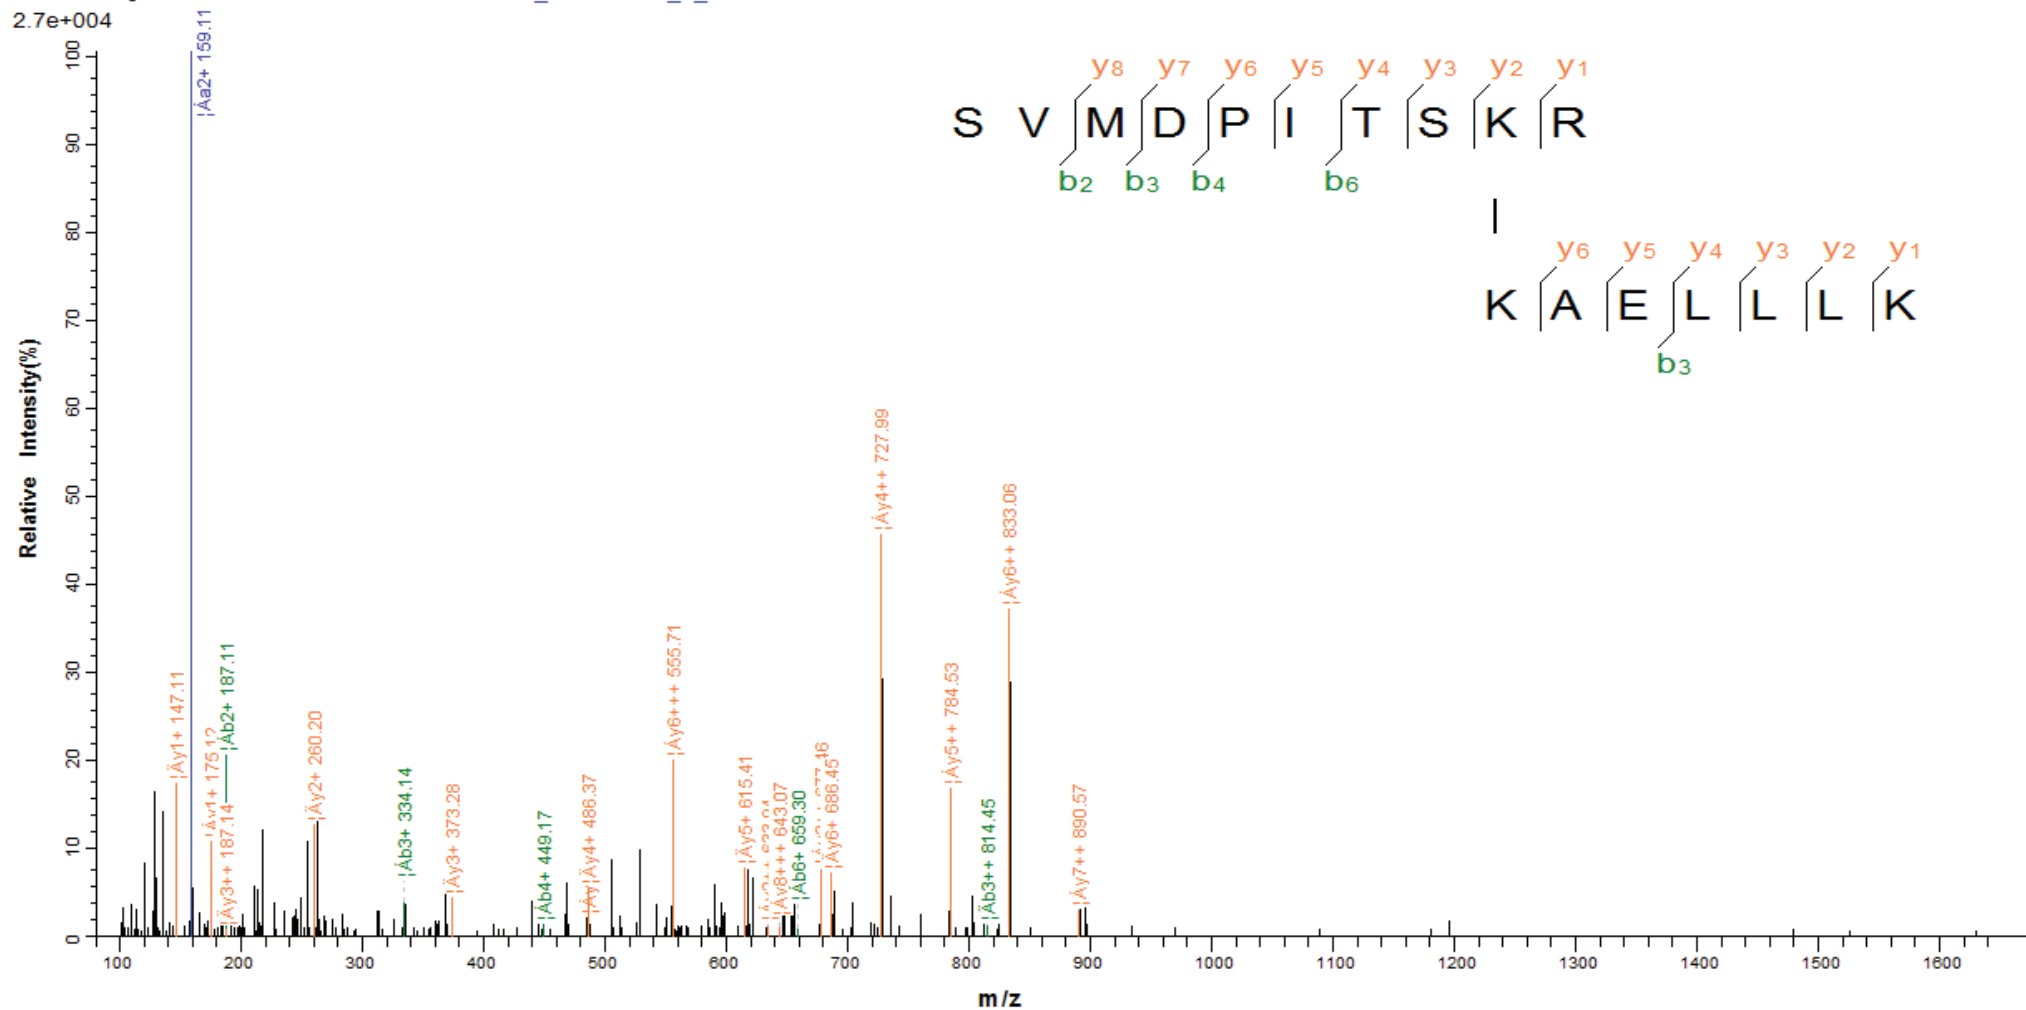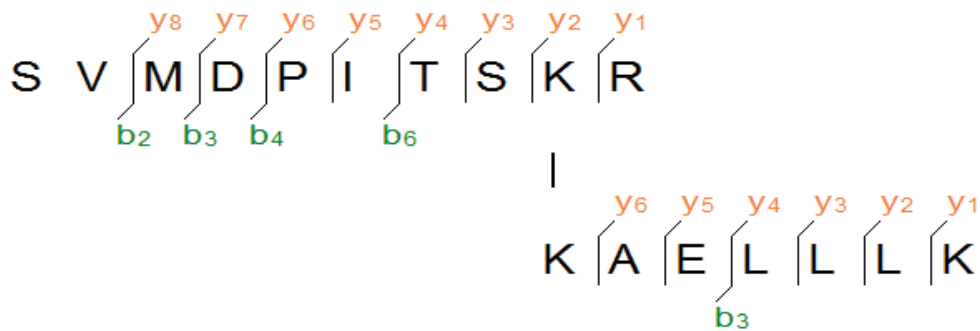

Seq: KAELLLK-CLPKVR Mod: 11,C\_57

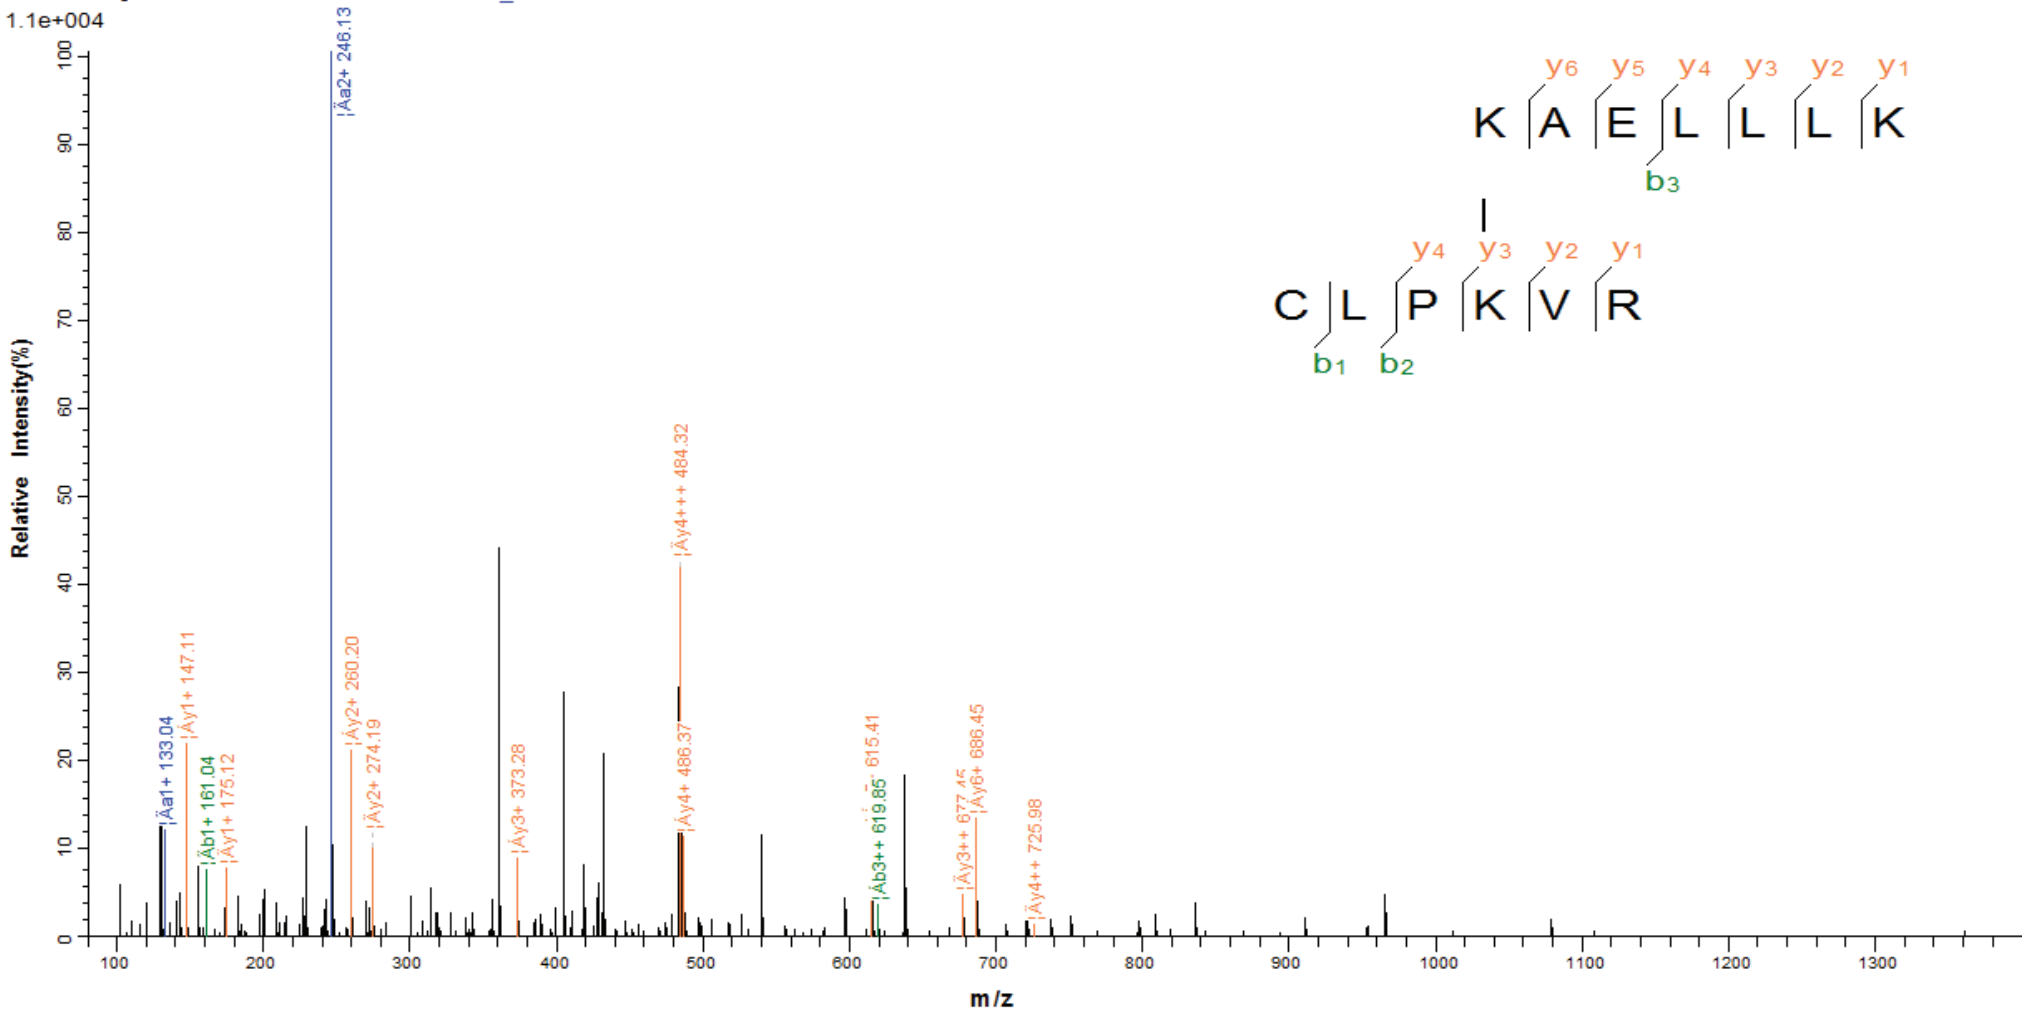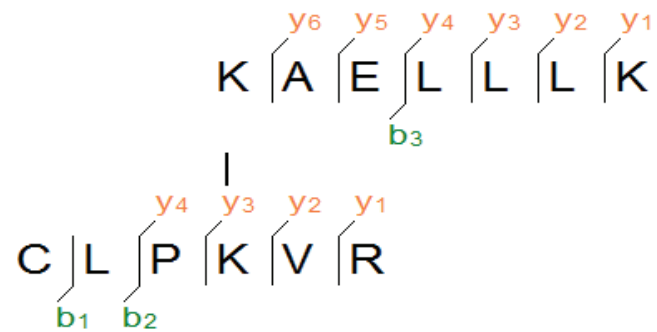

Seq: TIFFKDDGNYK-VNFKIR

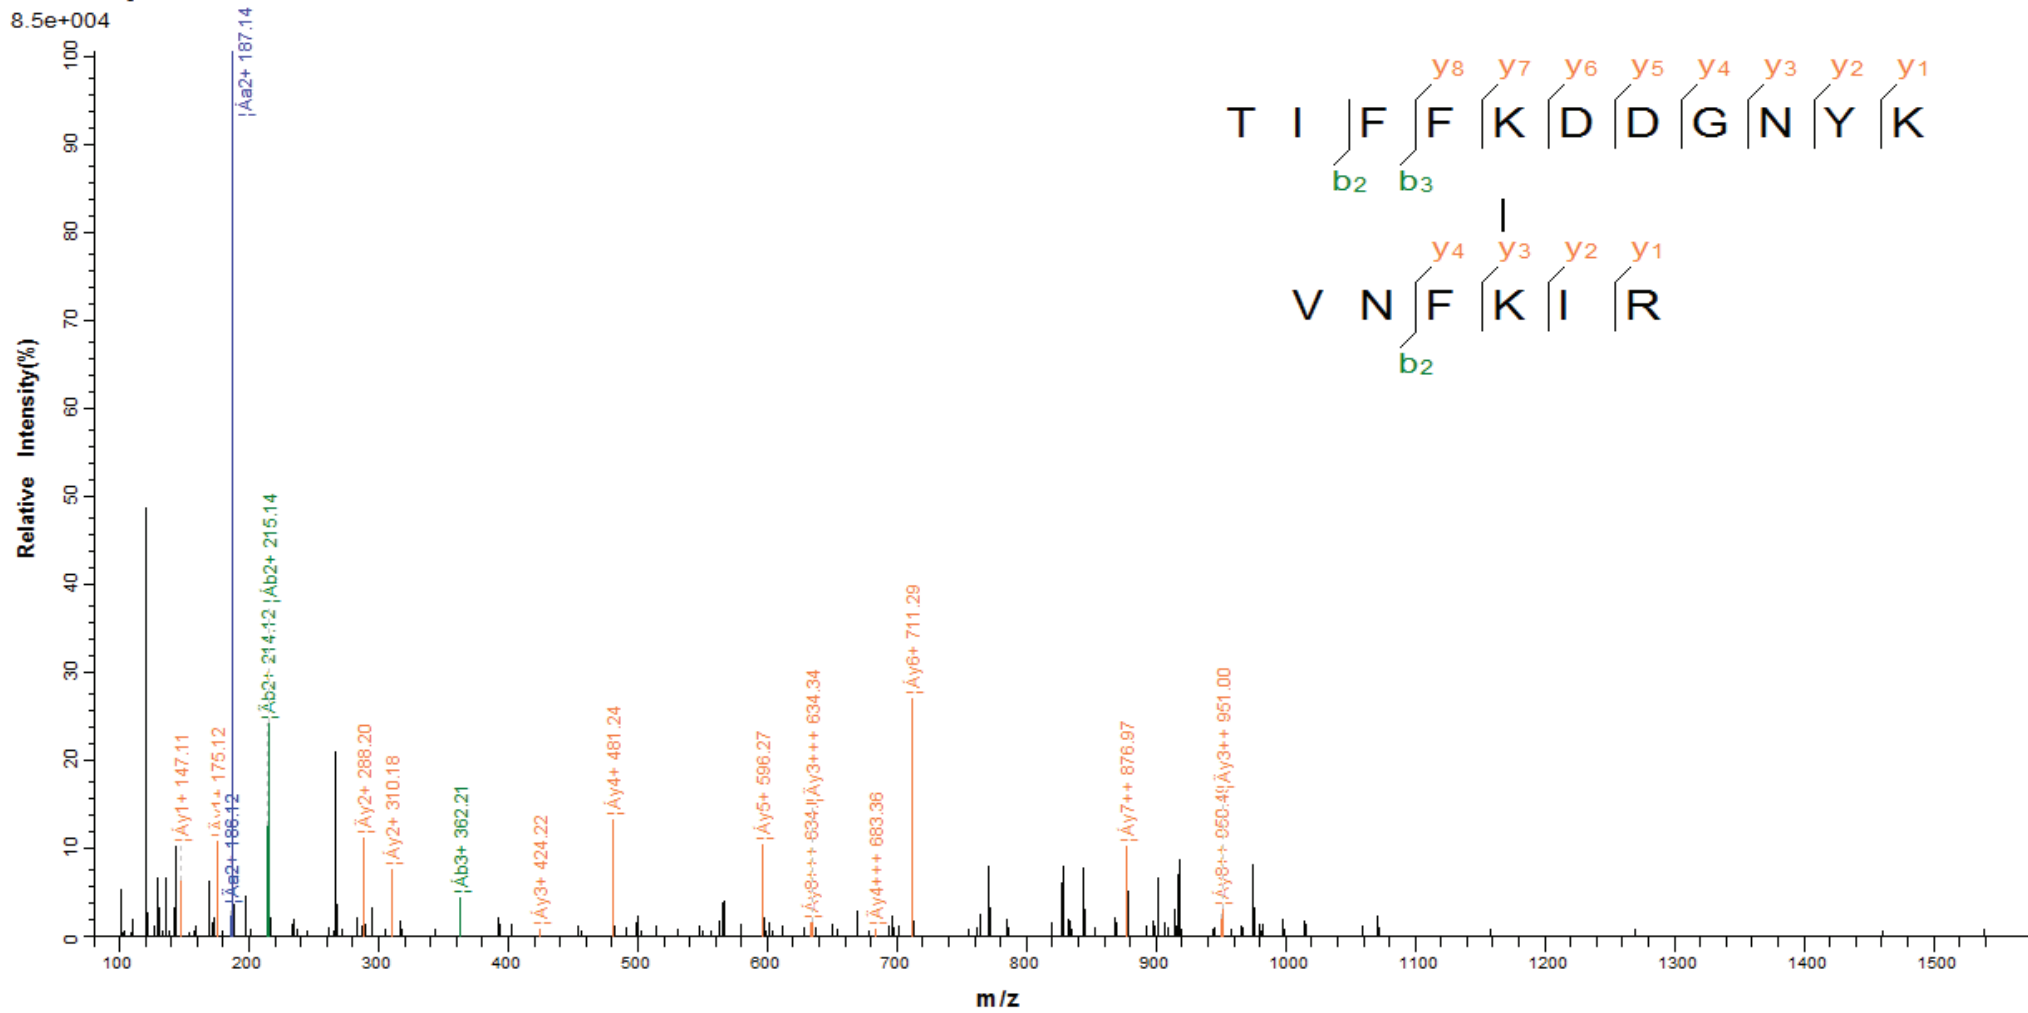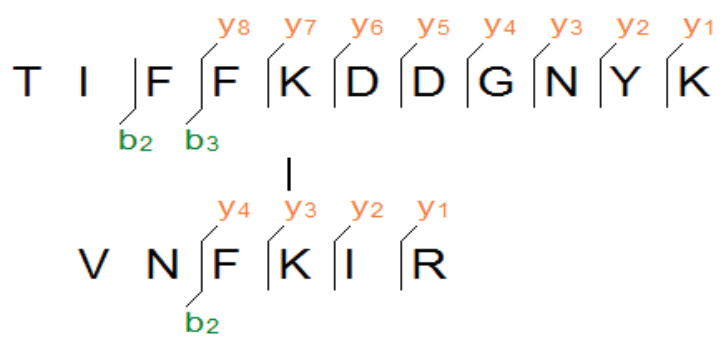

Seq: TIFFKDDGNYKTR-NGIKVNFK

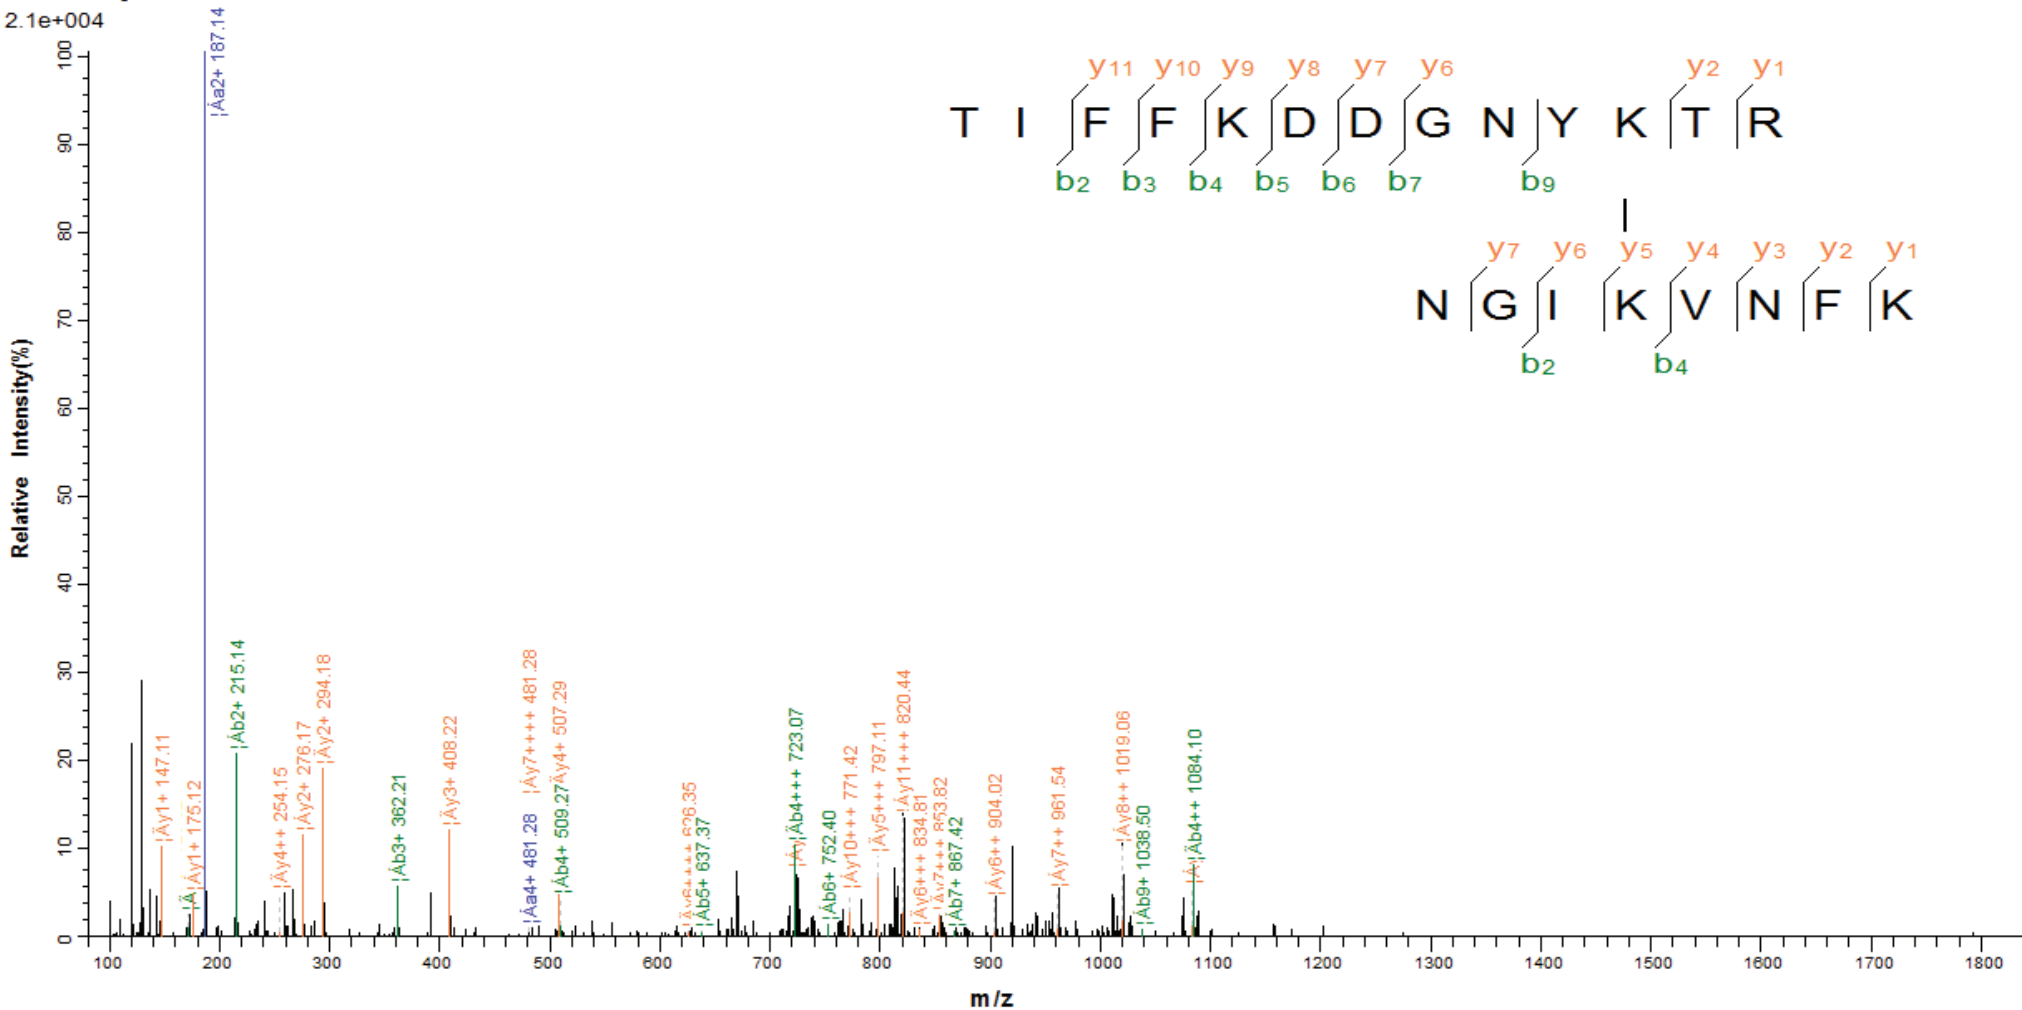

Seq: IELKGI<sup>DF</sup>KEDGNILG<sup>HK</sup>-TIFFKDDGNYKTR

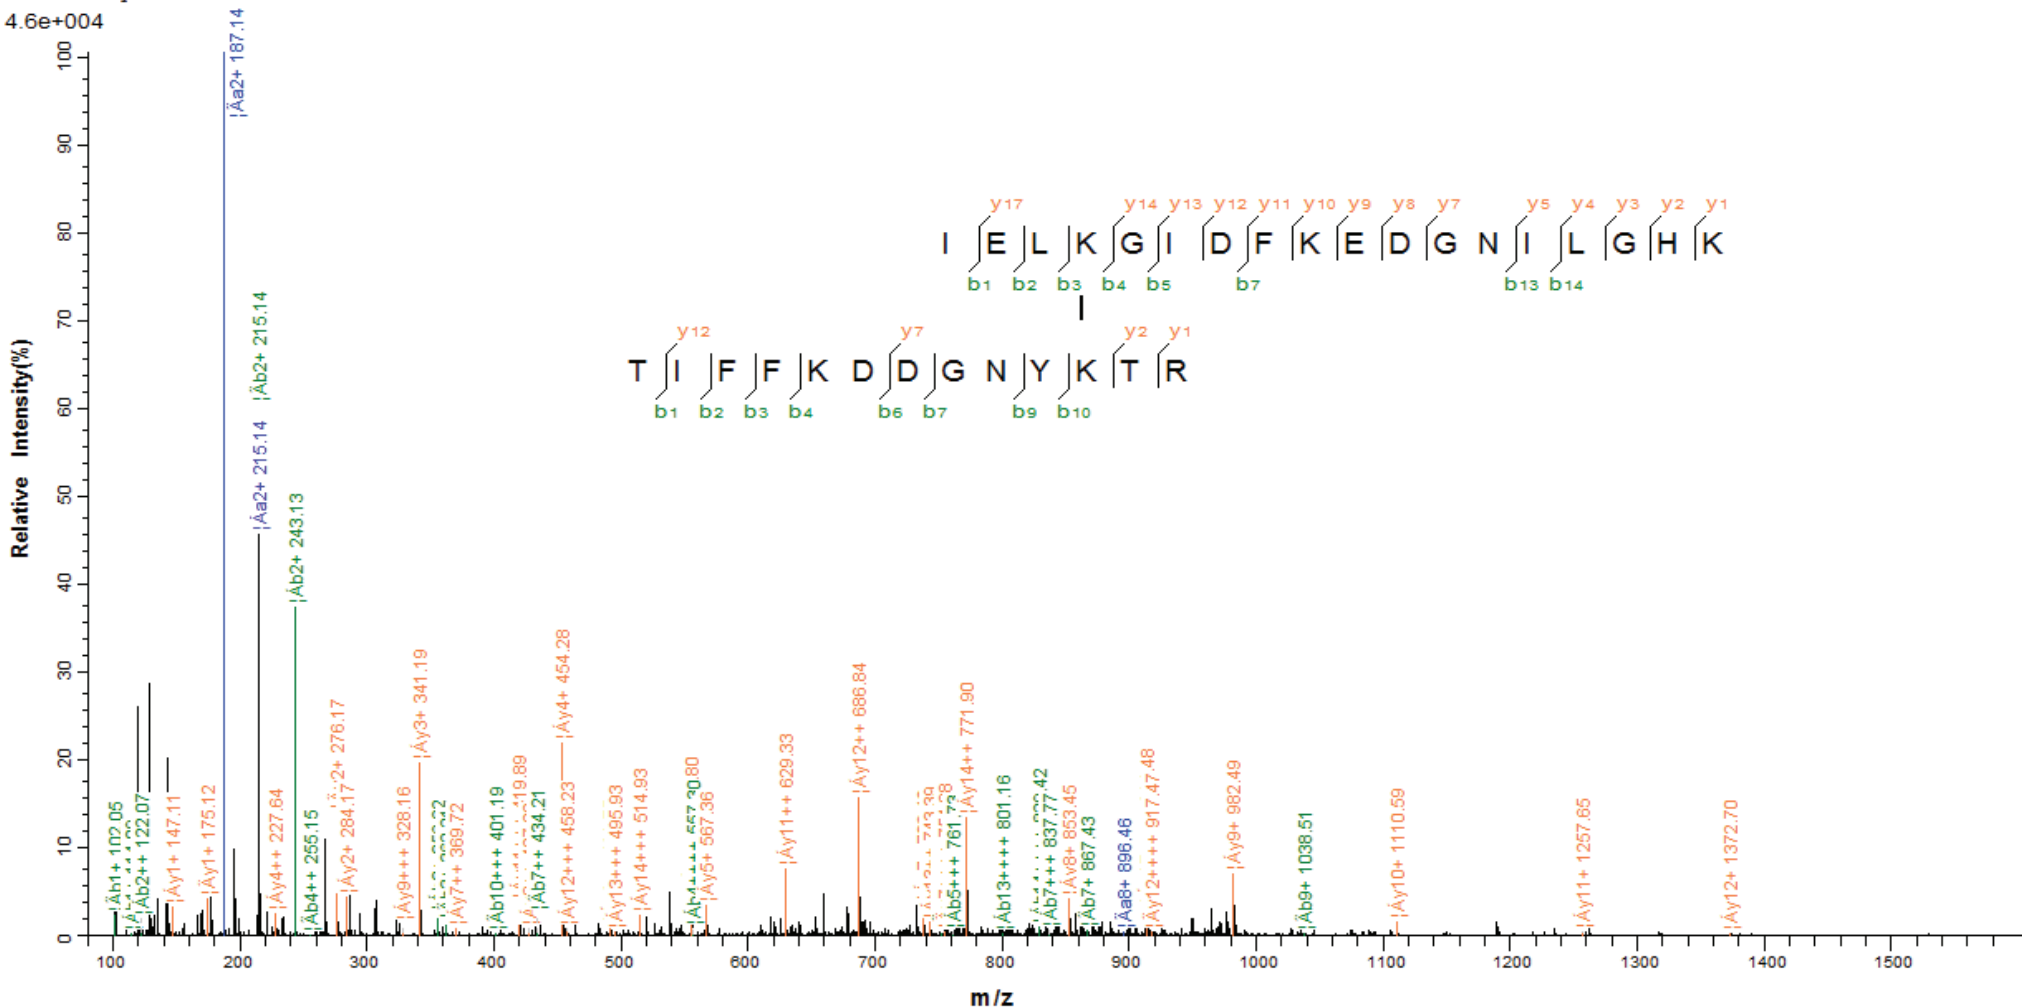



Seq: IELKGIDFK-DDGNYKTR

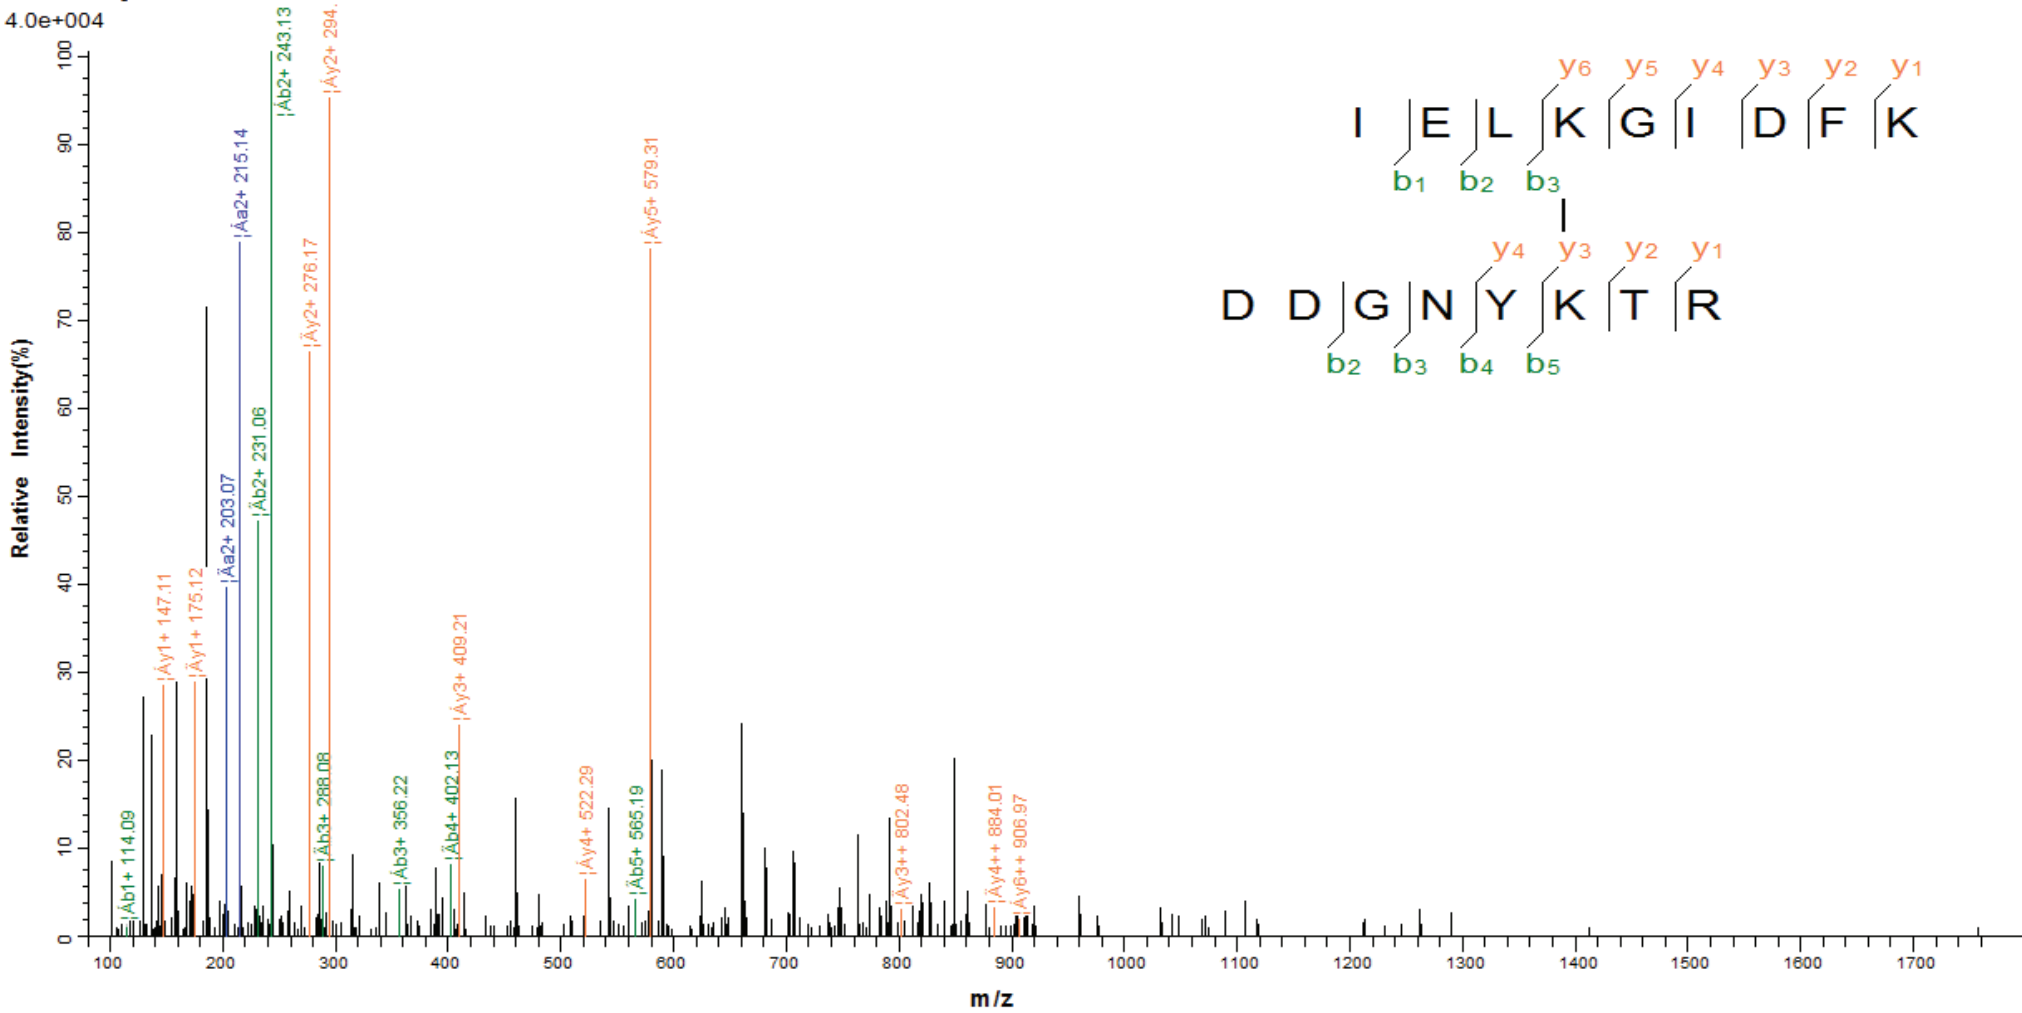

Seq: GIDFKEDGNILGHK-TIFFKDDGNYK

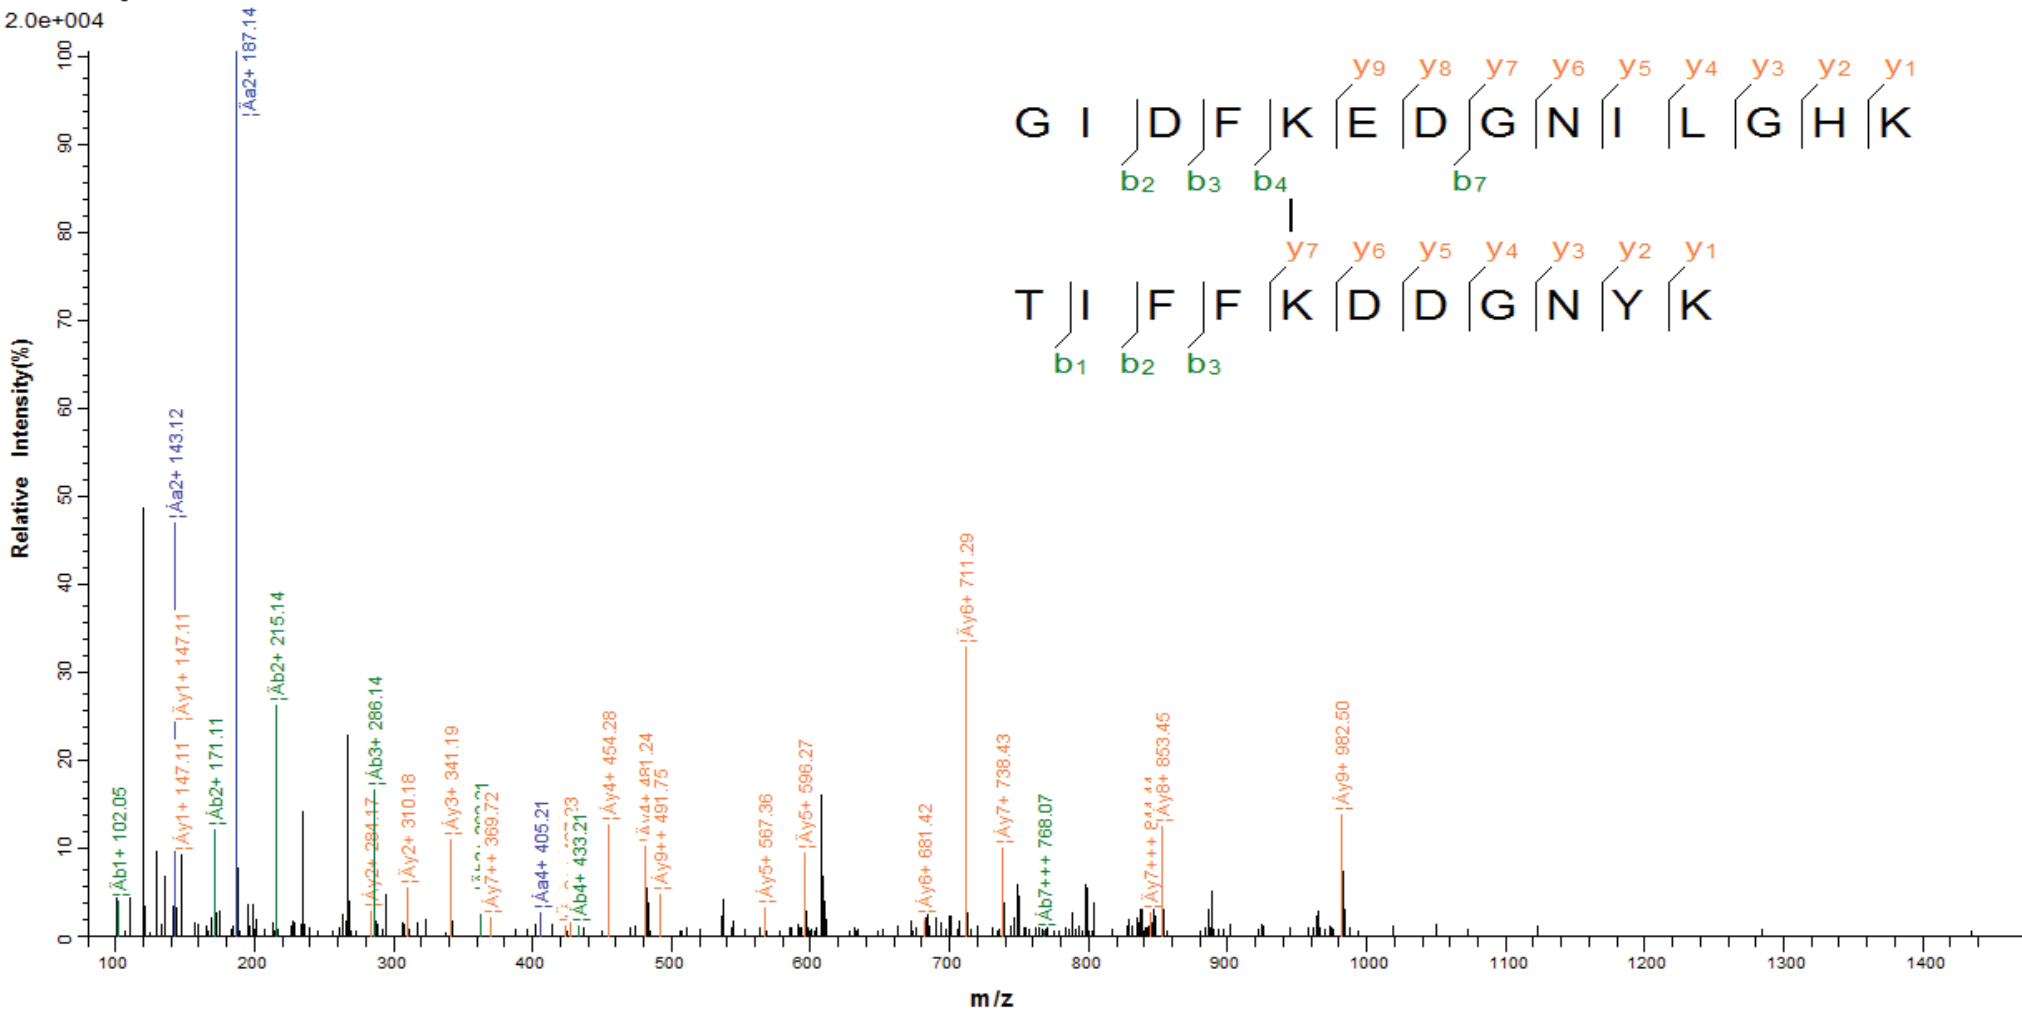

Seq: SNEKSQAEQEK-AKQYDNR

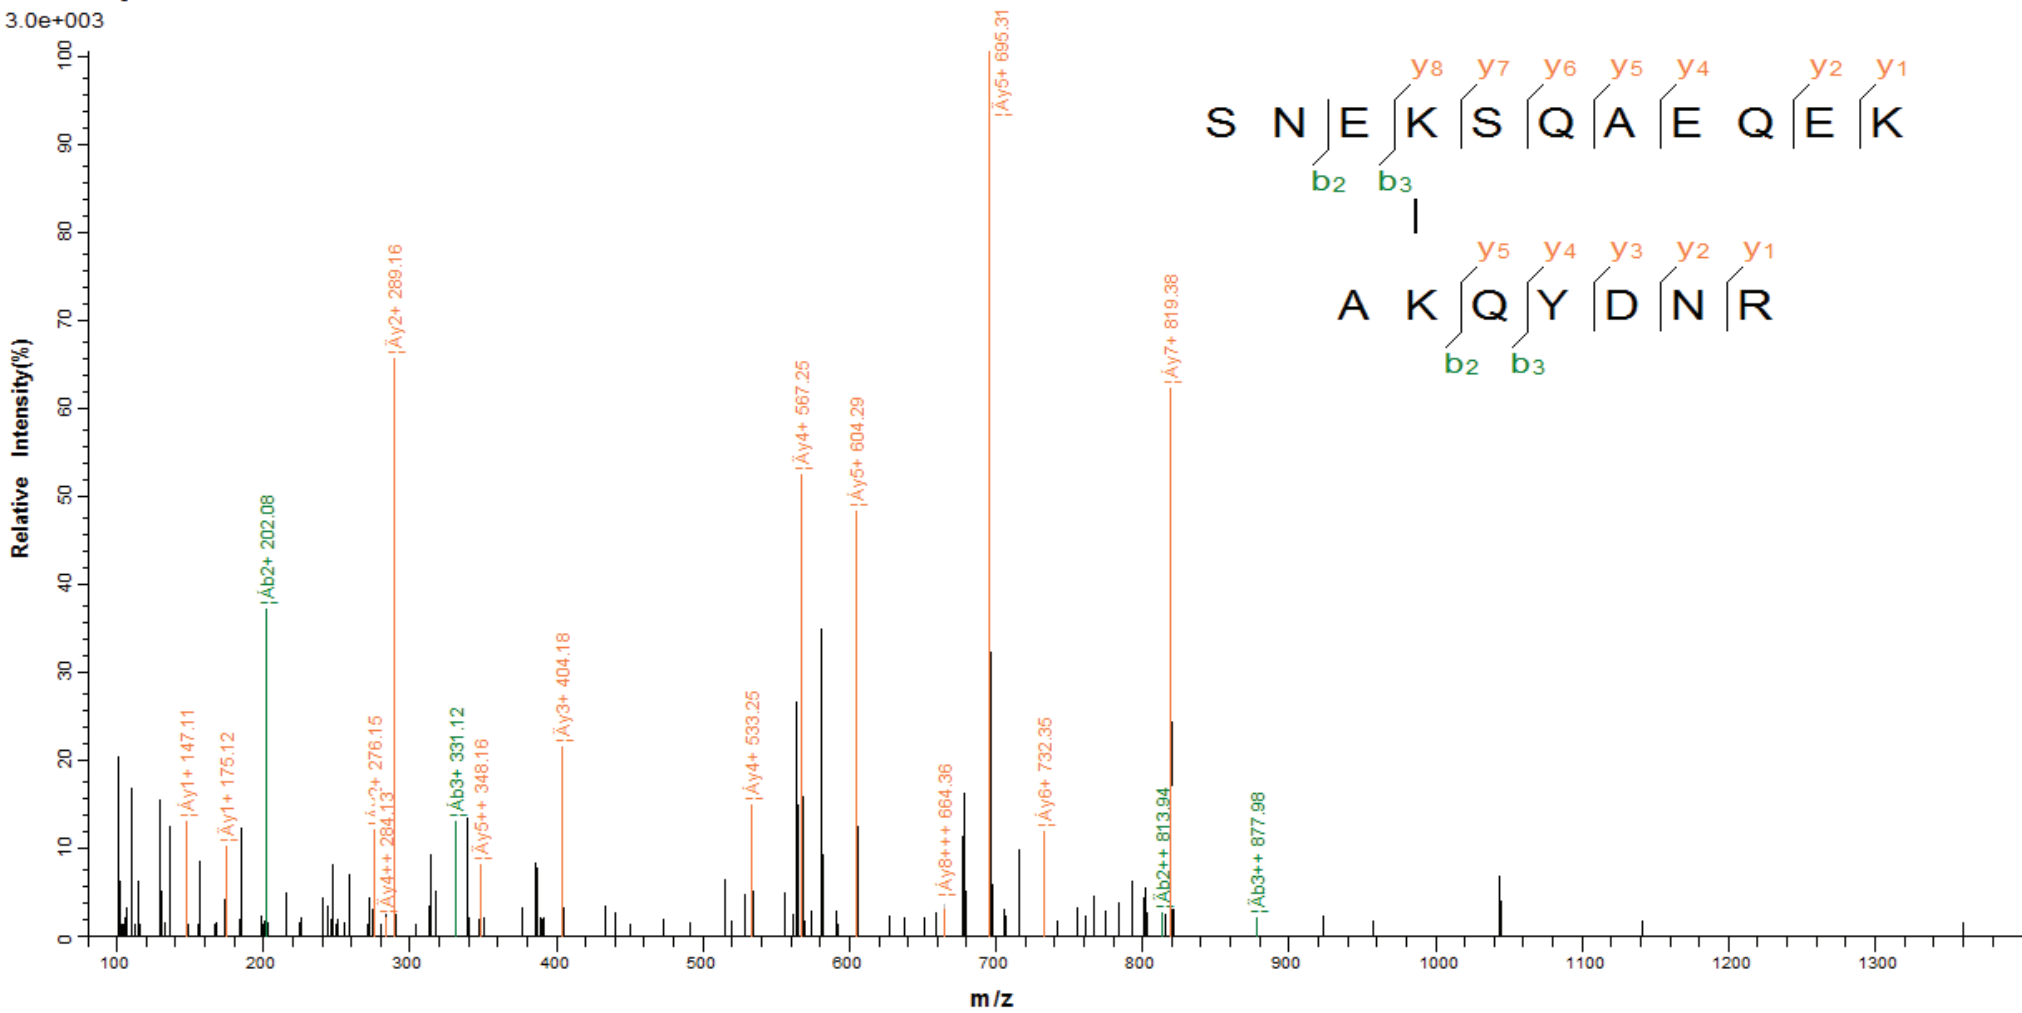

Seq: SQAEQEKAK-AKQYDNR

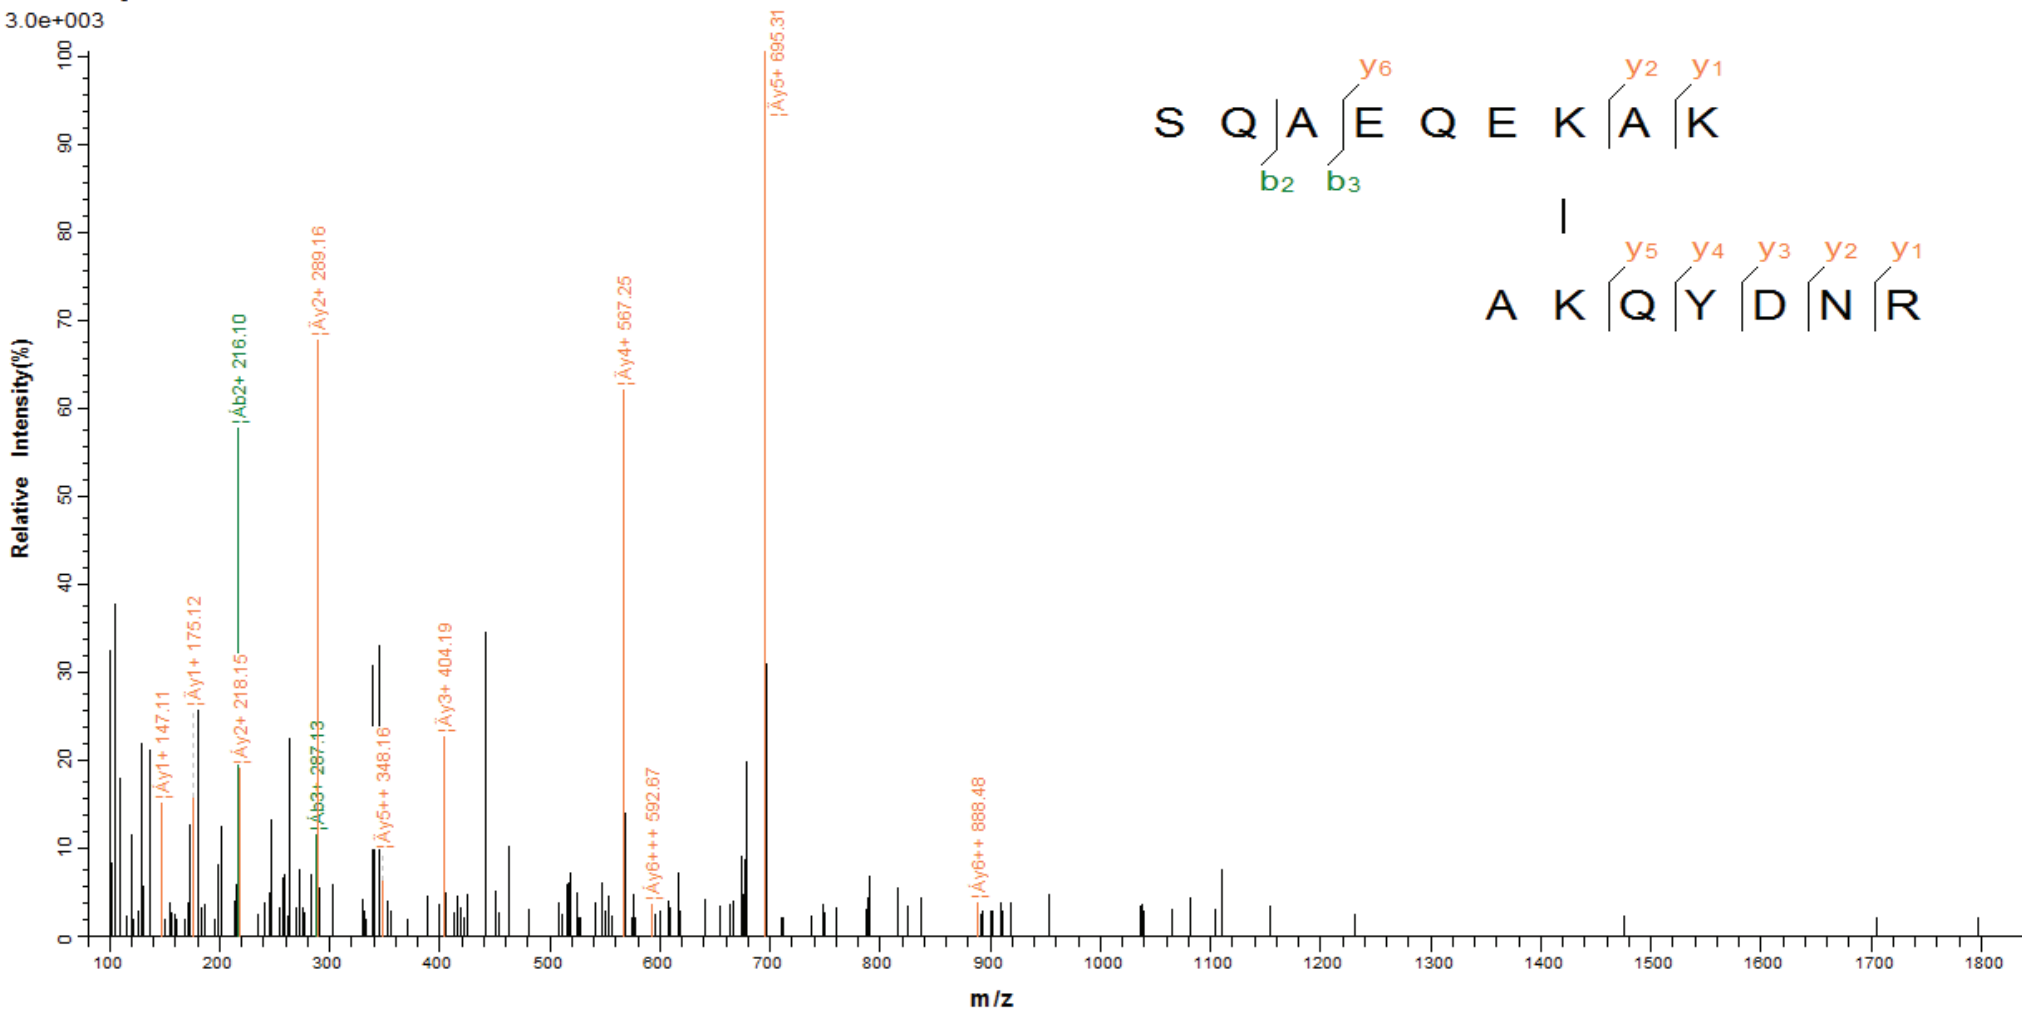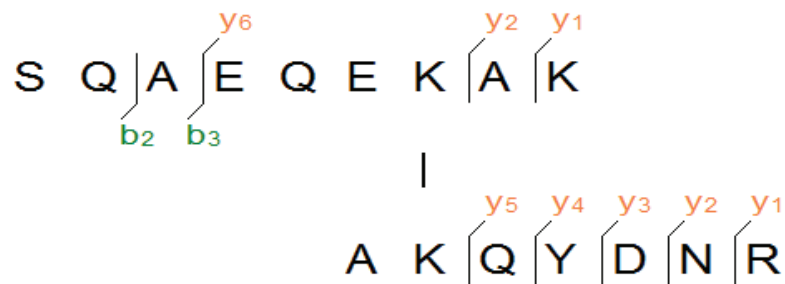

Seq: SQAEQEKAK-ITKSNEK

2.3e+003

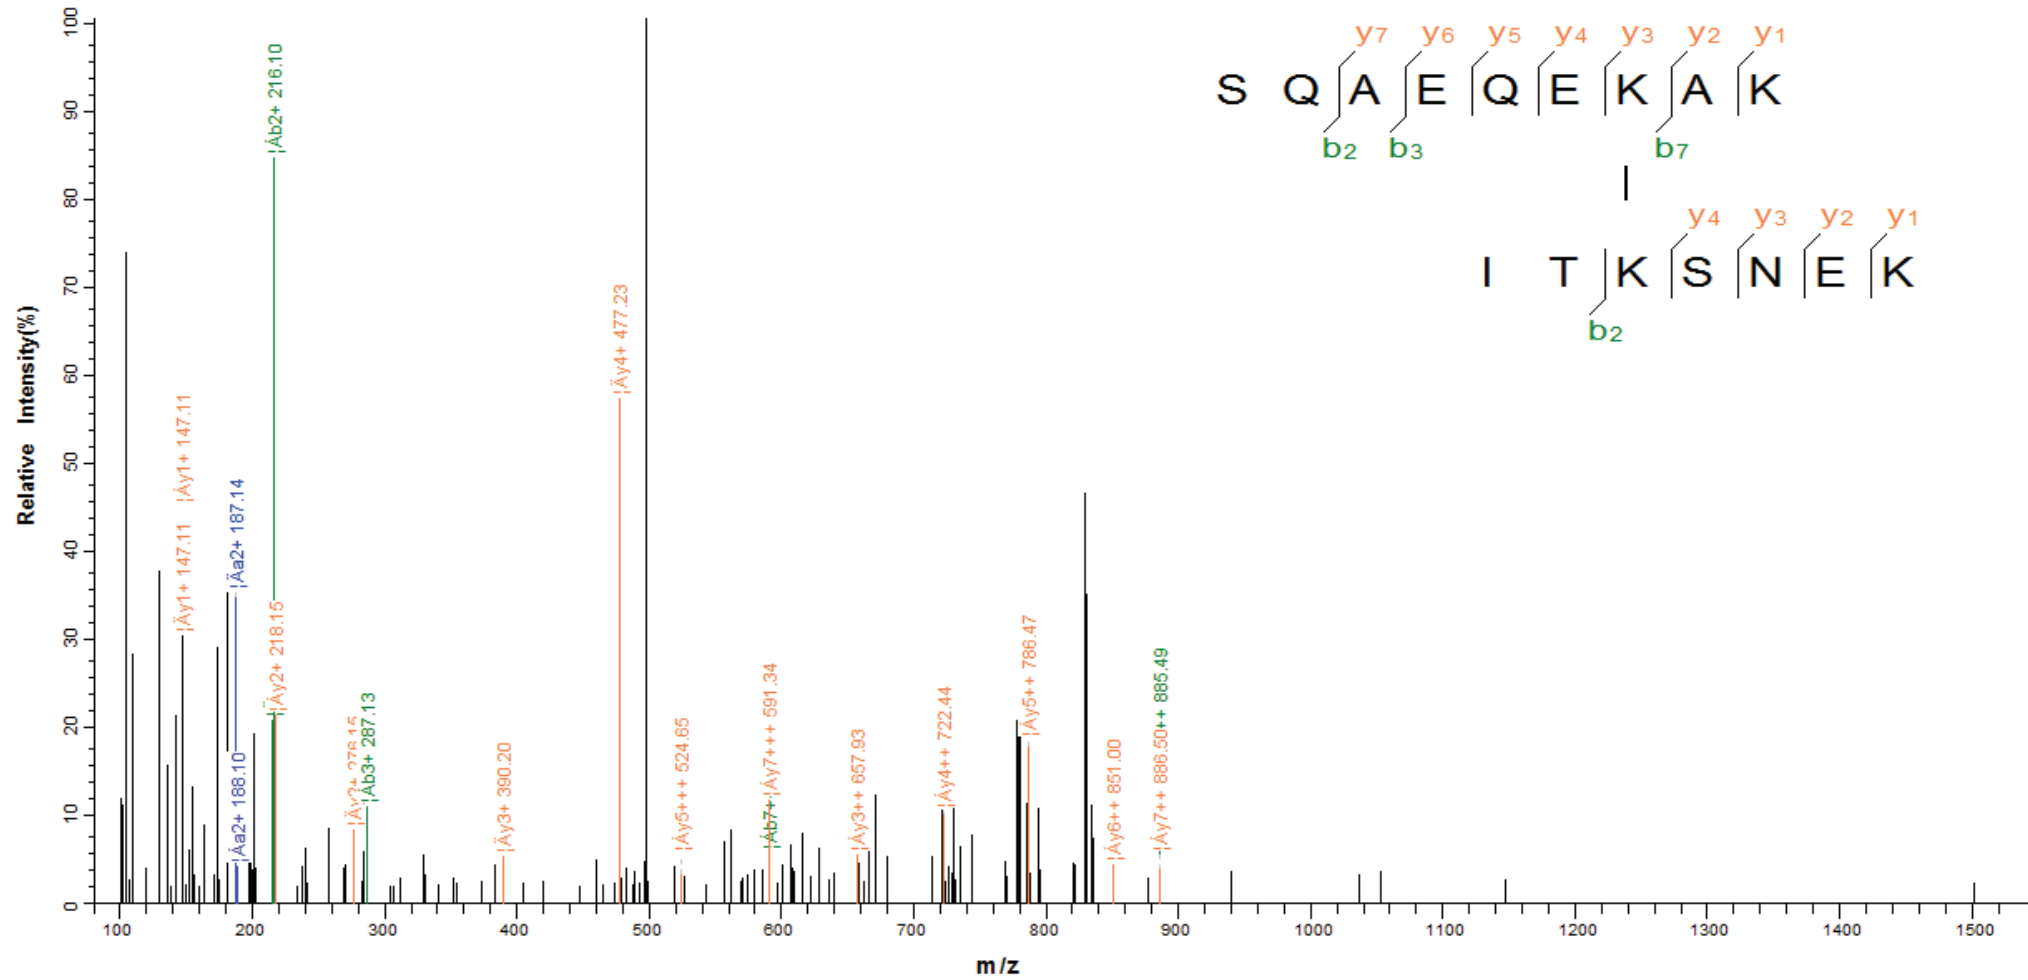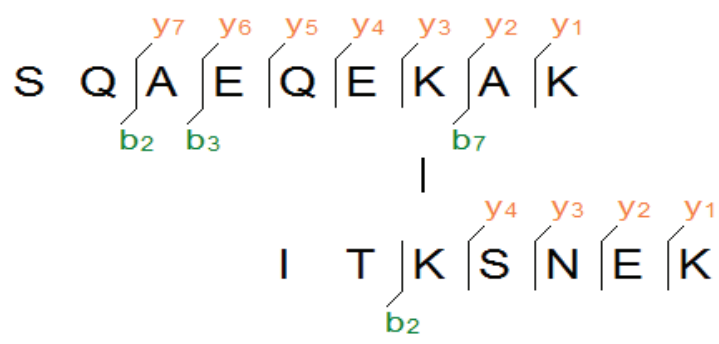

exosome\_A8\_1.005069.005069.4.dta Seq: AKNIISNVLDGNK-SNEKSQAEQEK

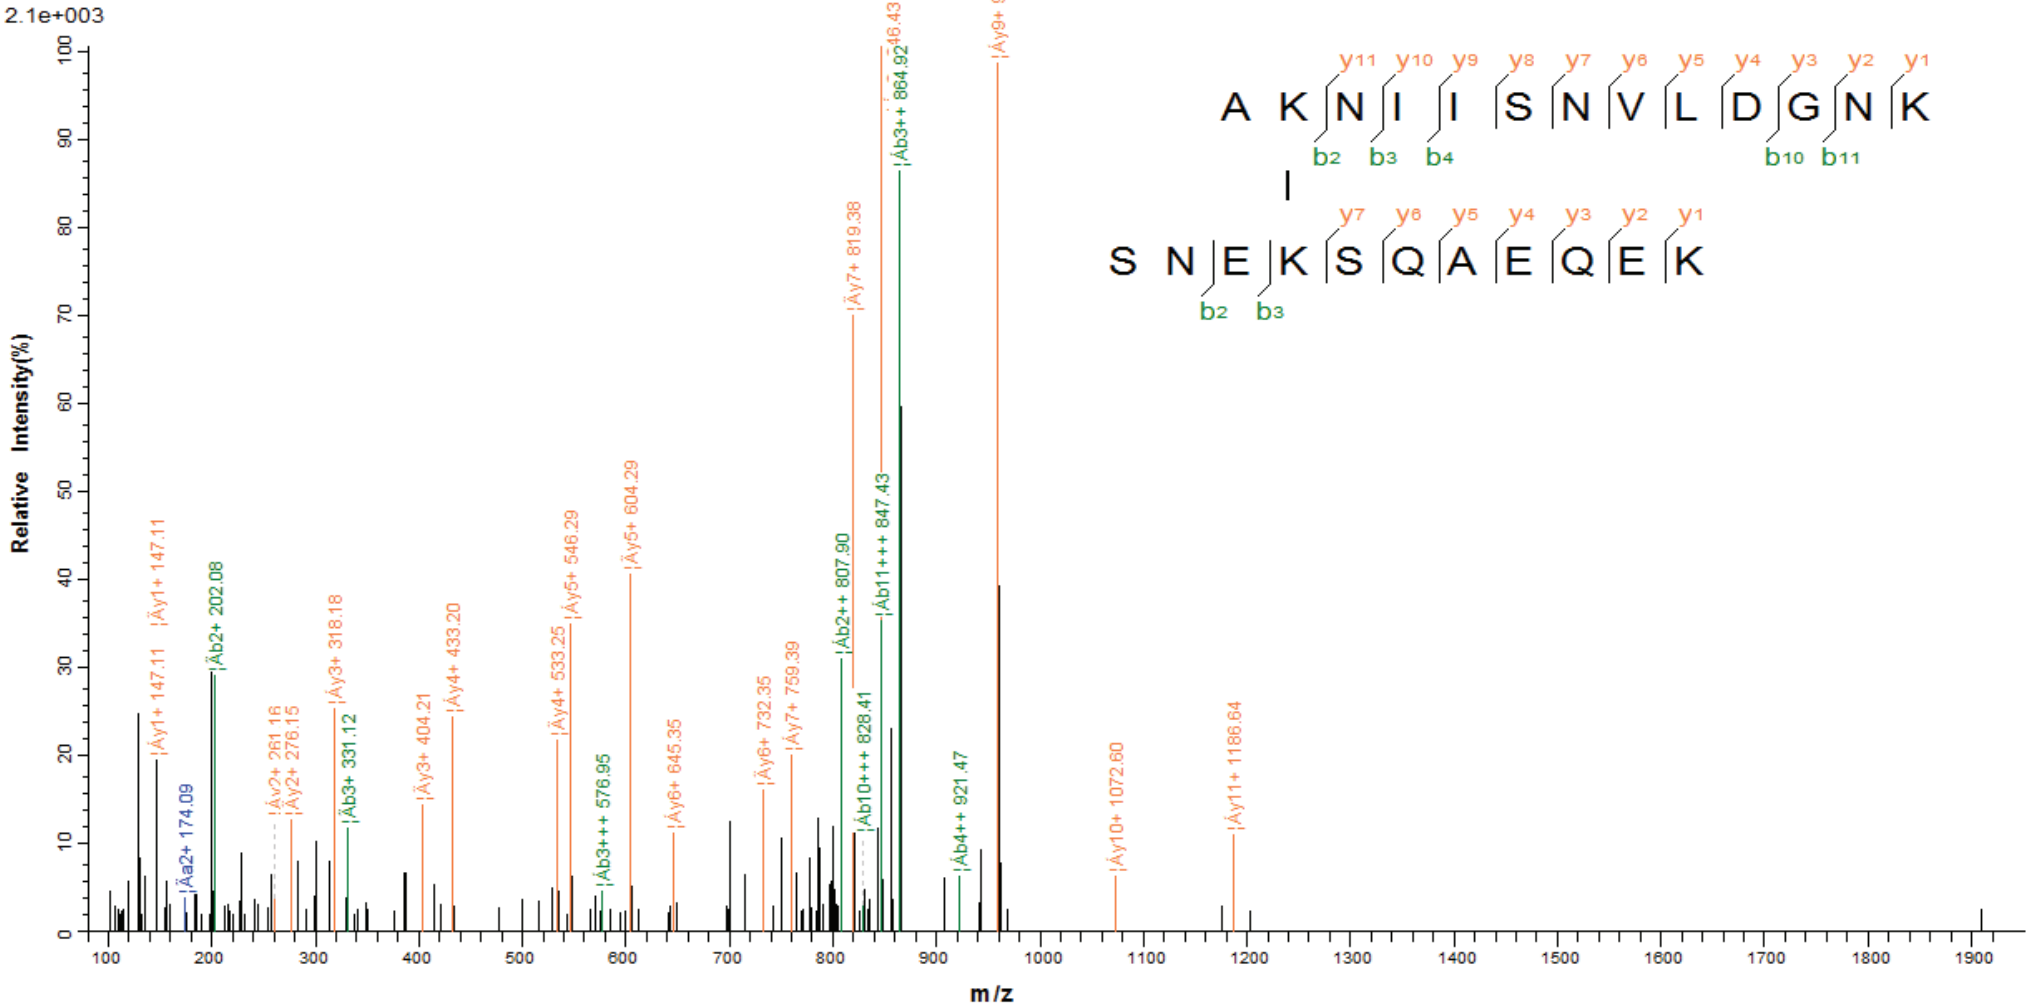

Seq: AKNIISNVLDGNK-AKQYDNR

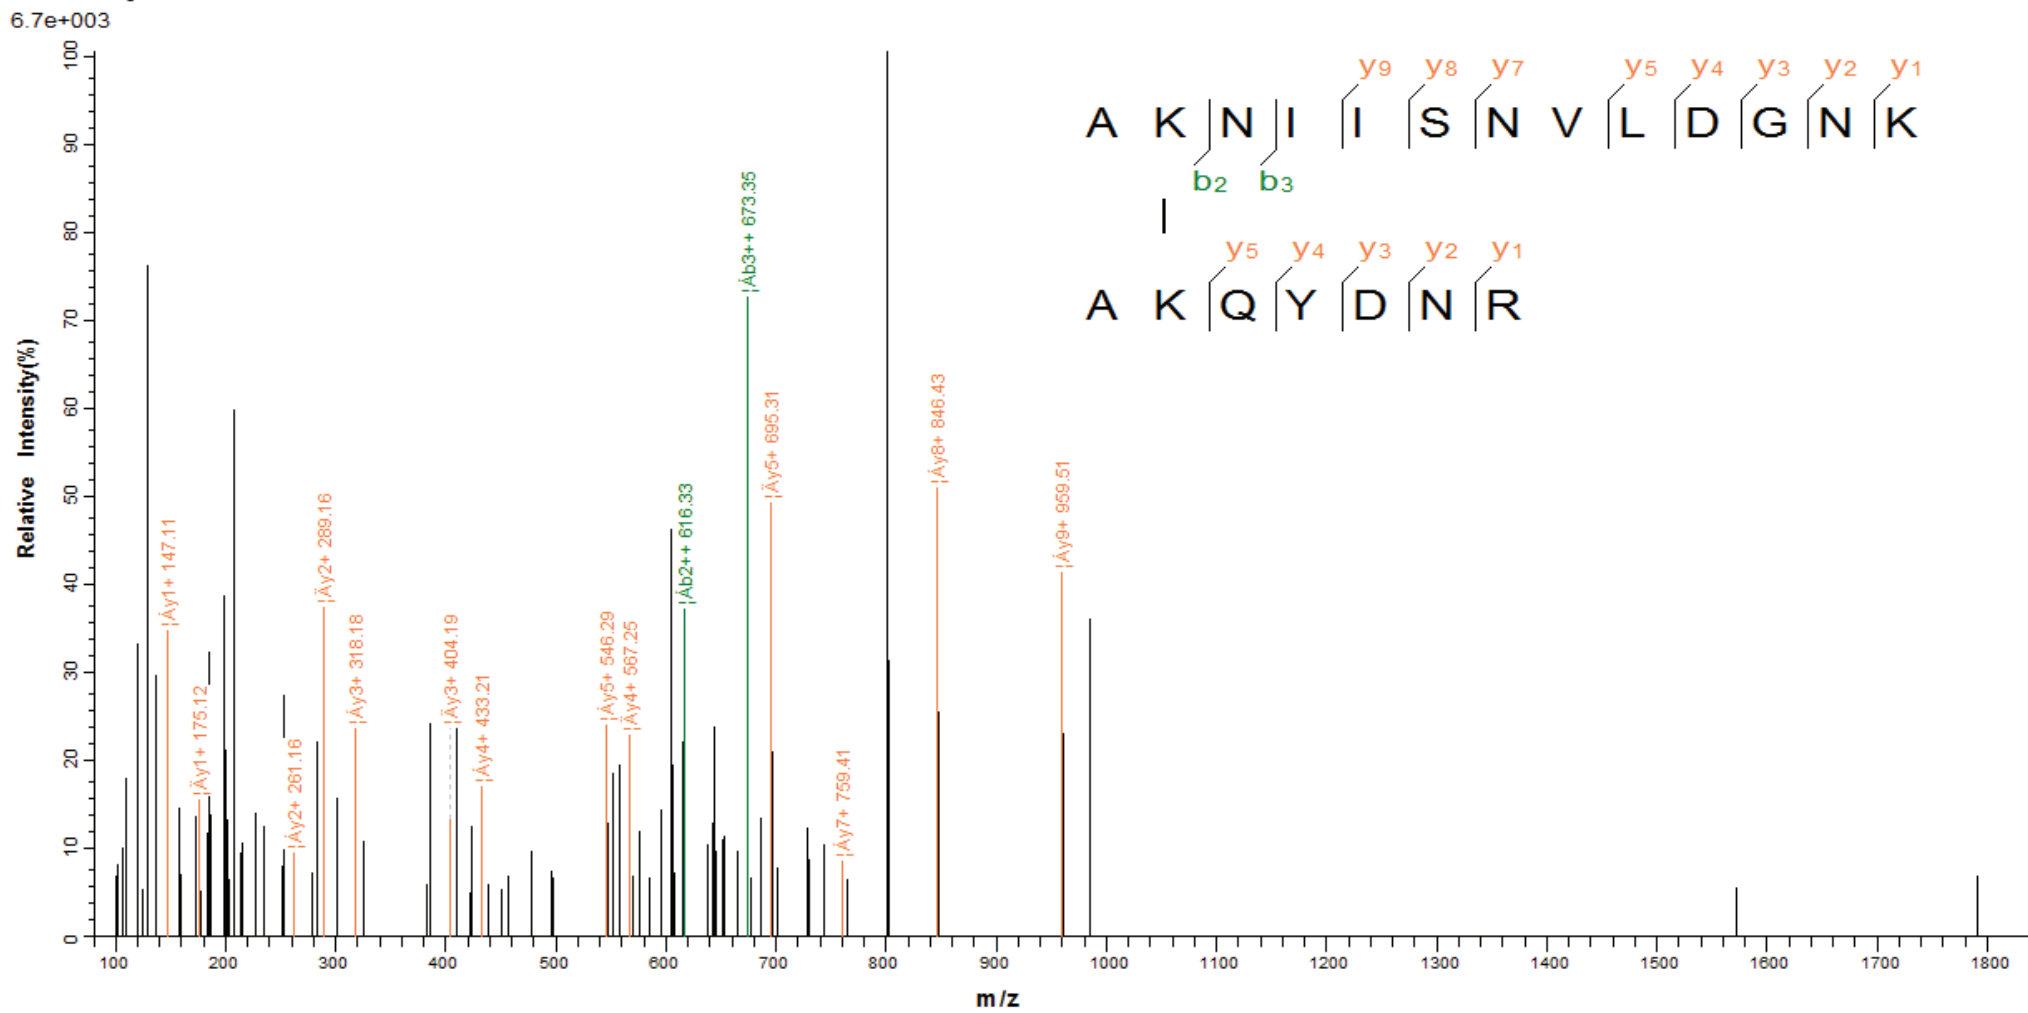

Seq: FENDELAESTTTKIIDSTDHIR-KASSK

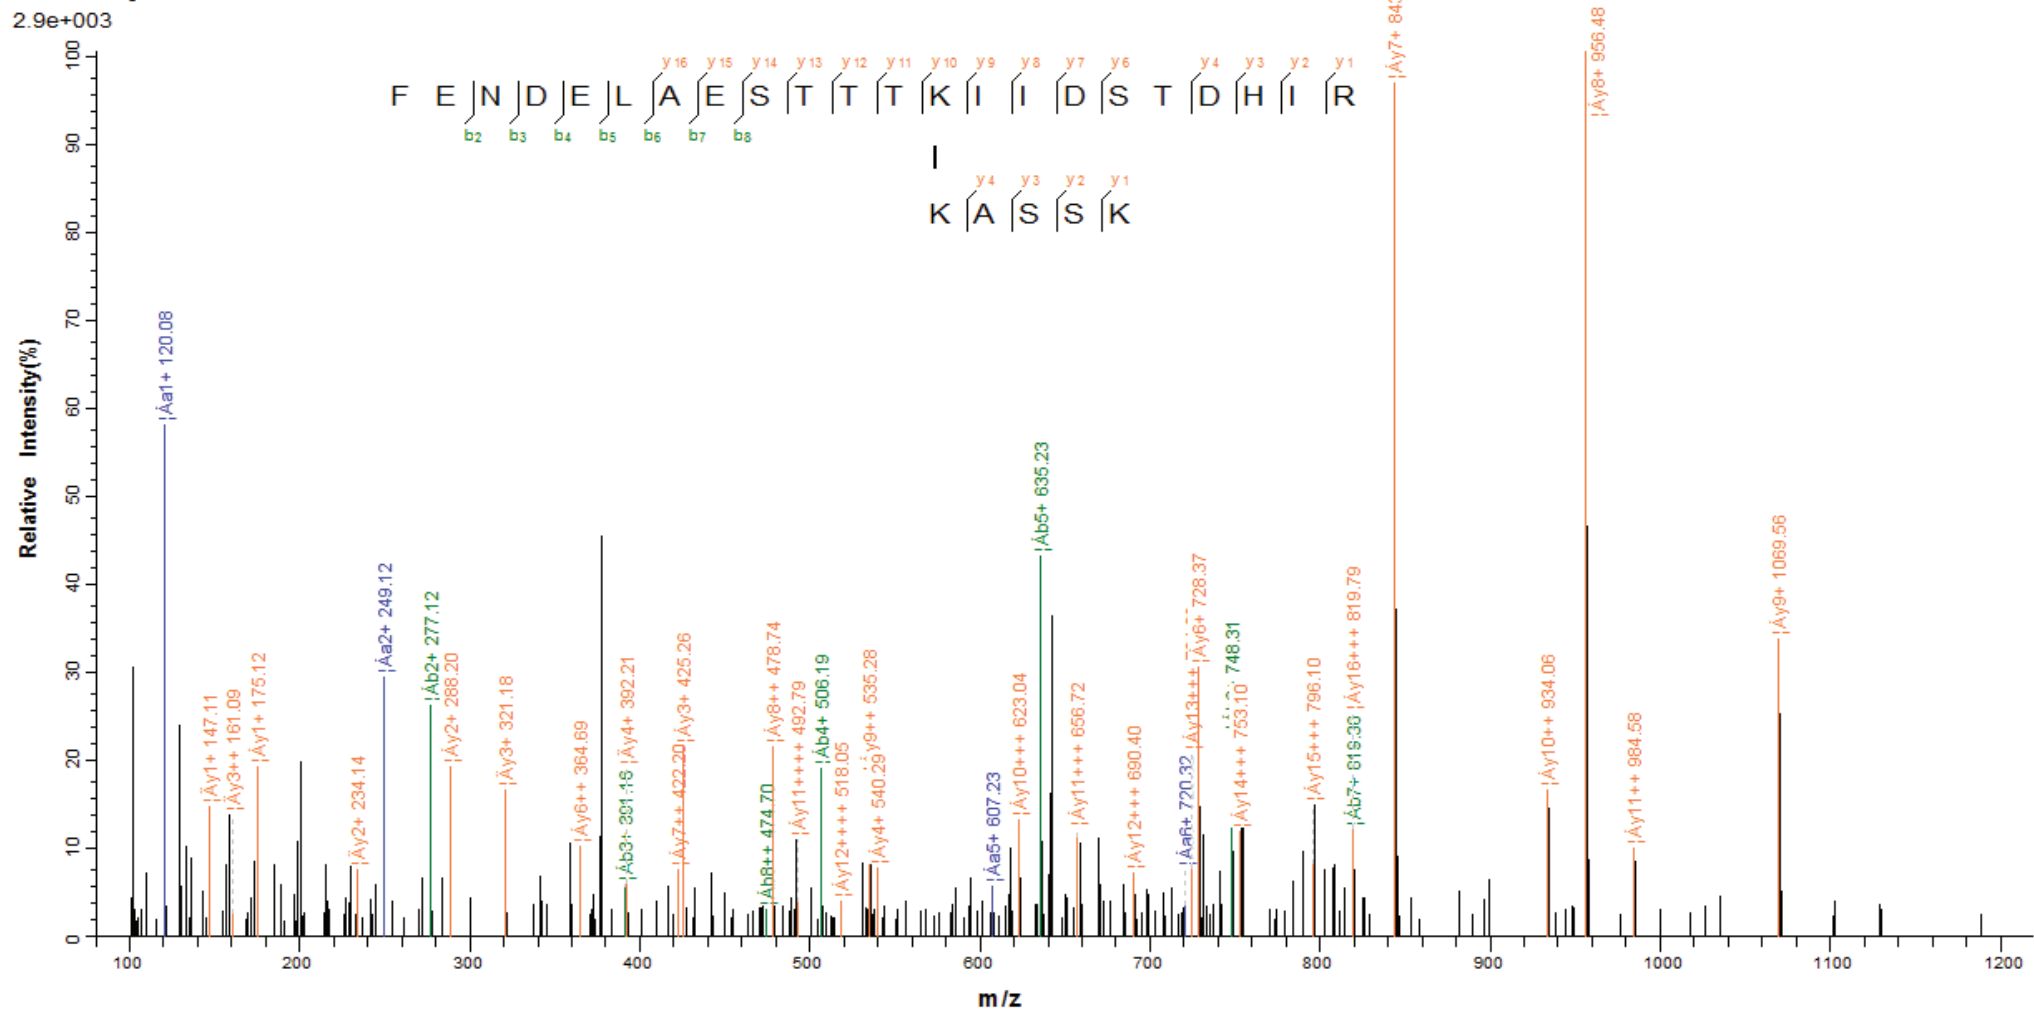



Seq: SFSKALDELKPEIEK-IKPYVR

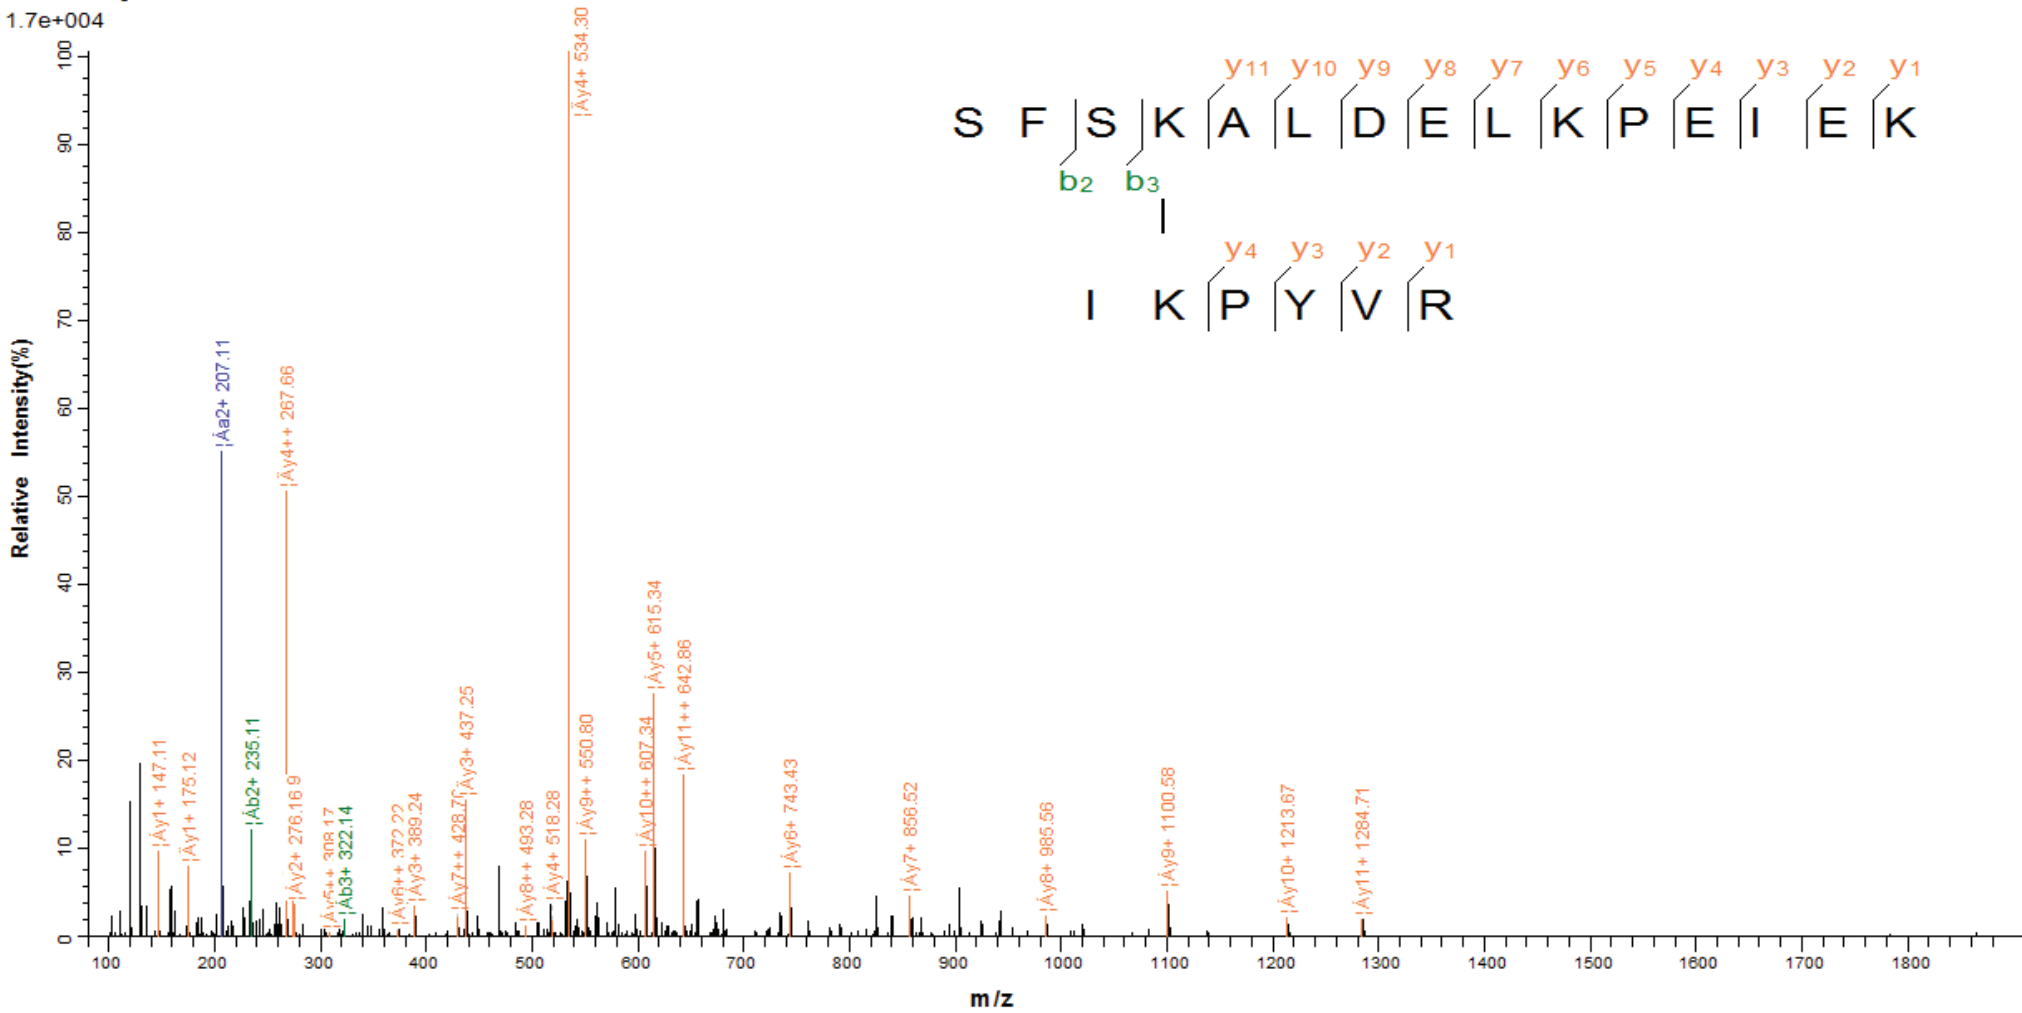

exosome\_A9\_140503145423.3556.3556.4.dta Seq: AKLELINR-IKPYVR

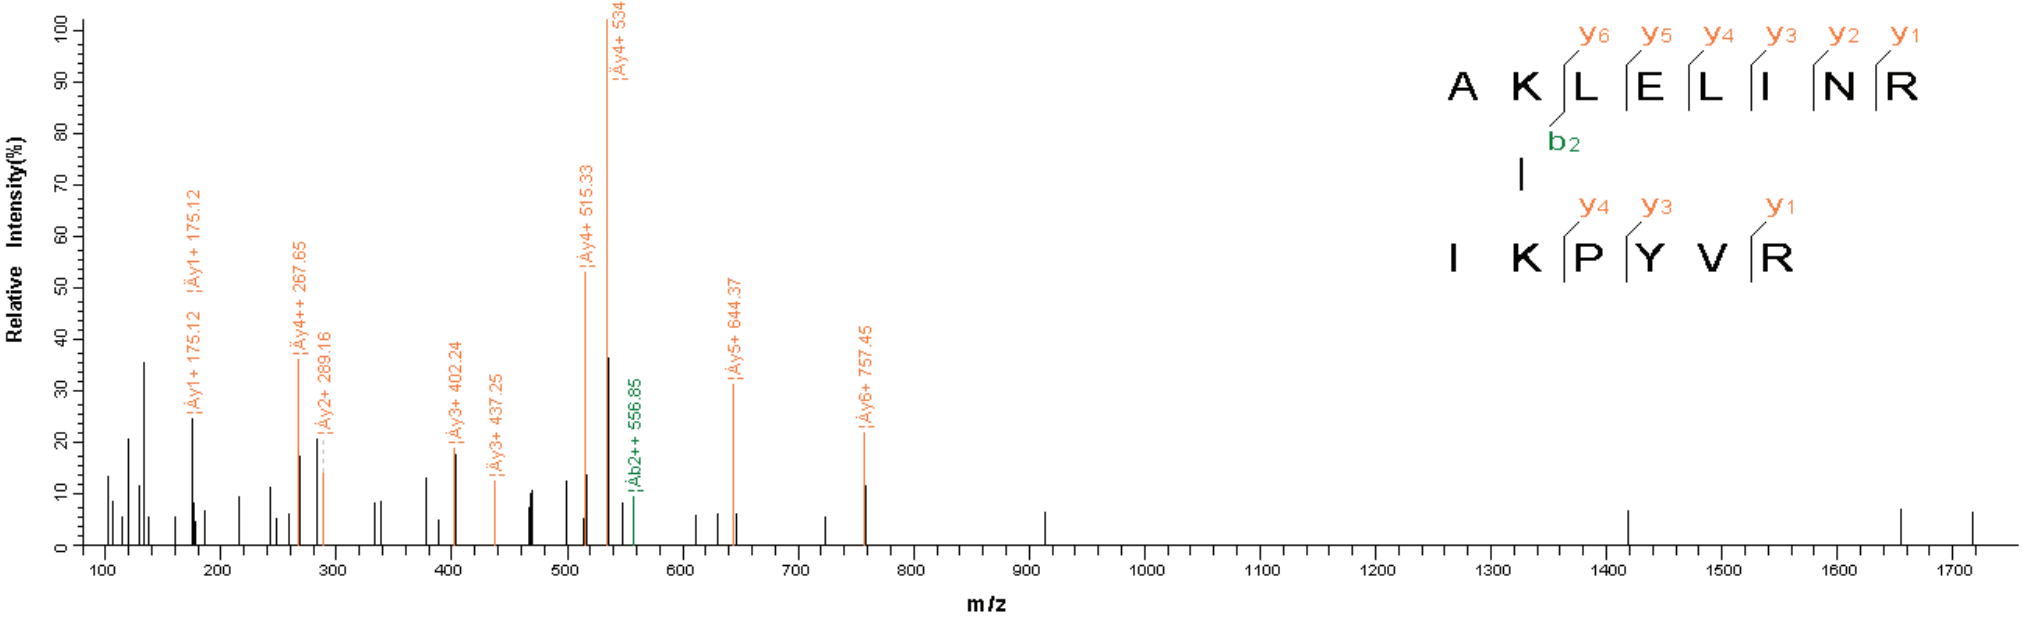

Seq: DMSPILGELKR-VKSYMDK Mod: 2, Oxidation\_M\_15.995

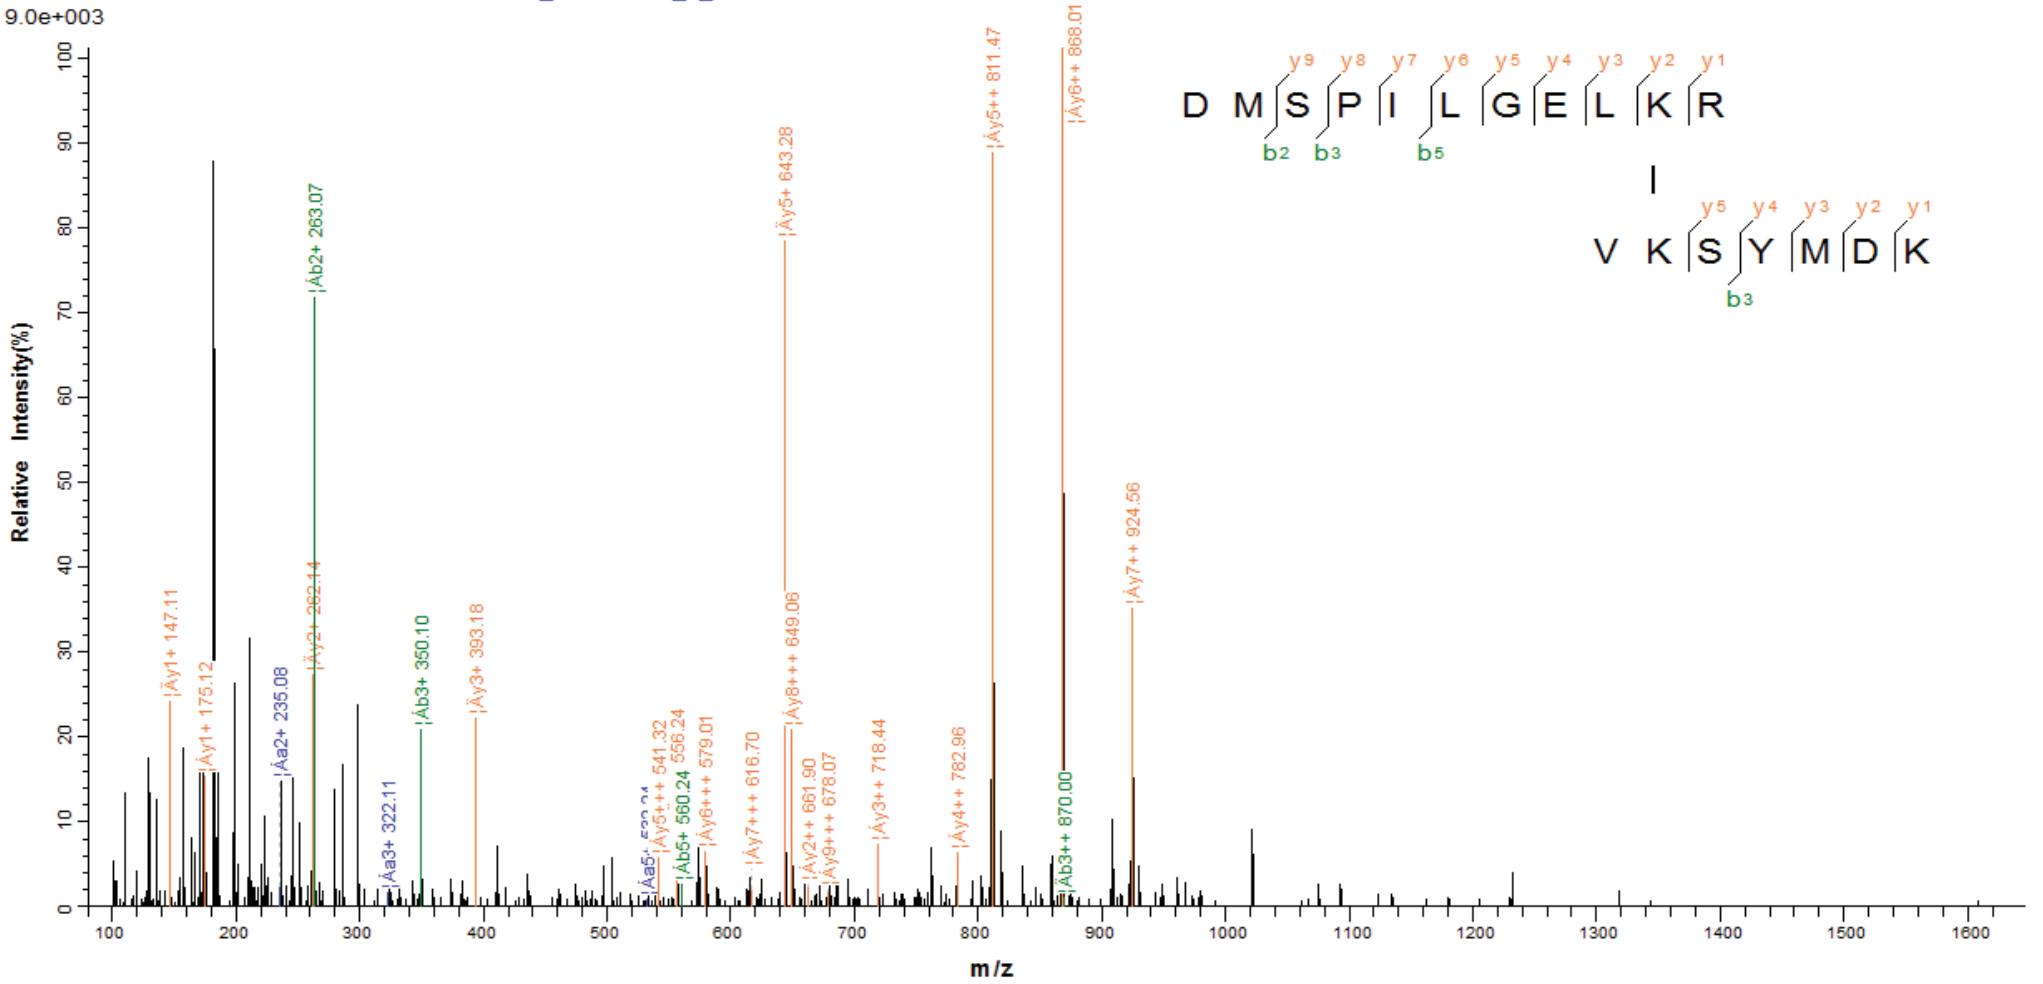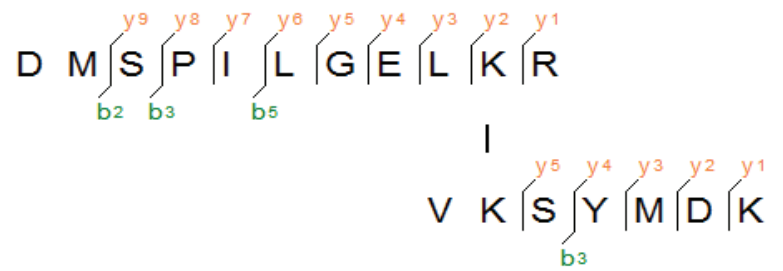

Seq: RVKSYMDK-AKQYDNR

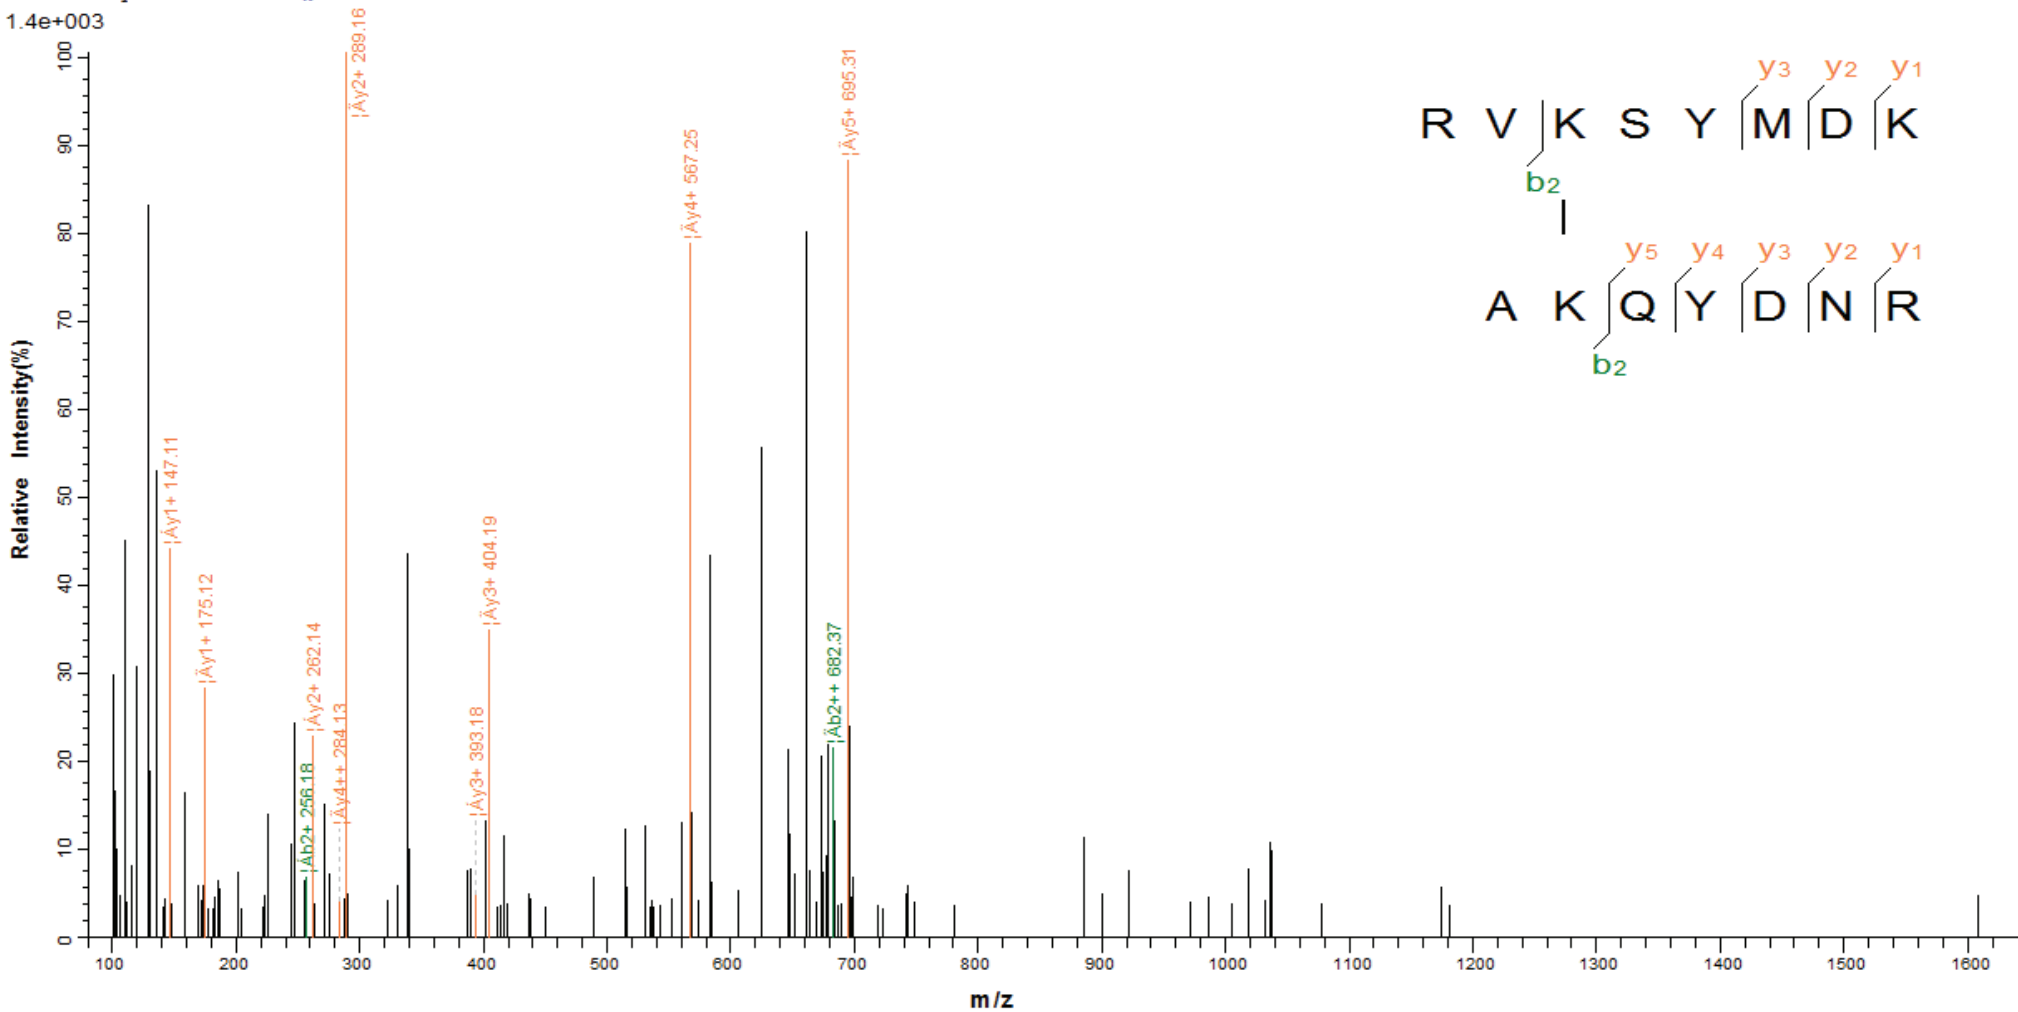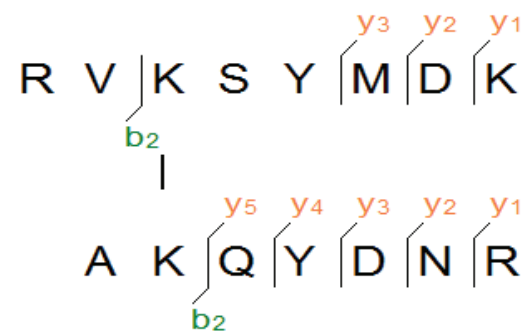

seq: AKQYDNR-VKSYMDK

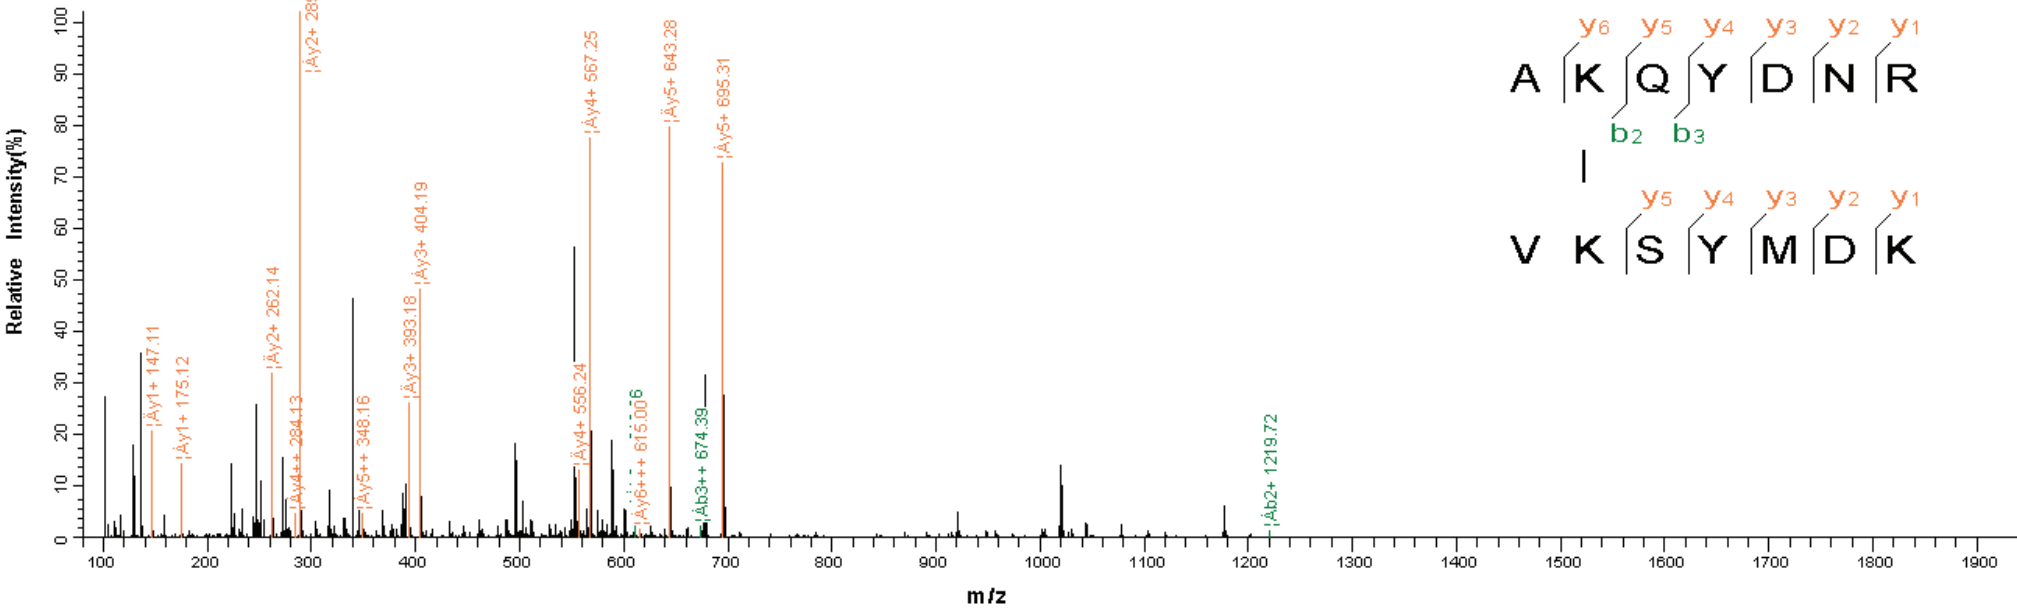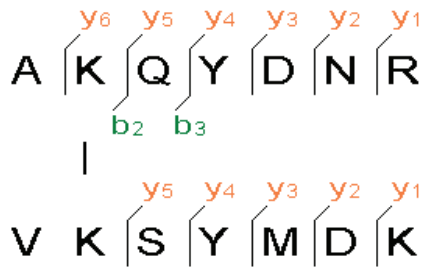

Seq: AKQYDNR-ITKSNEK

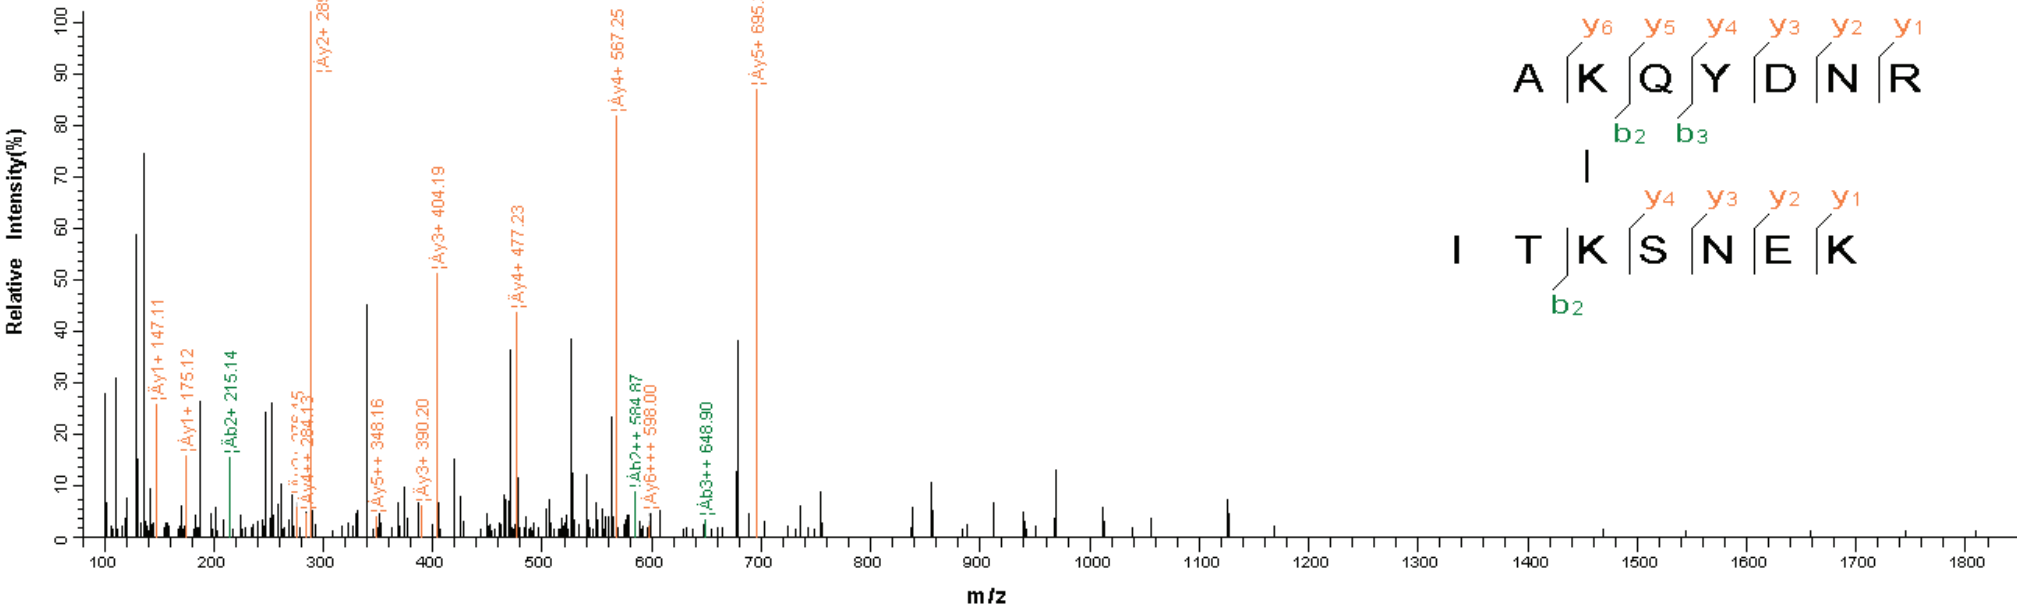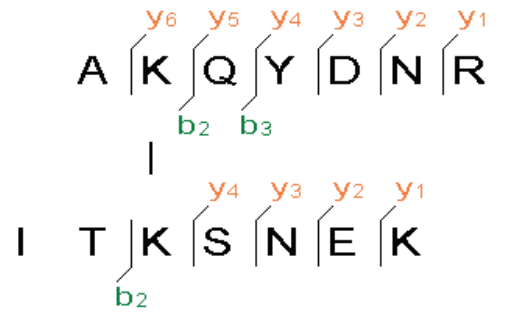

Seq: KTSQMDLAR-SLKYGK

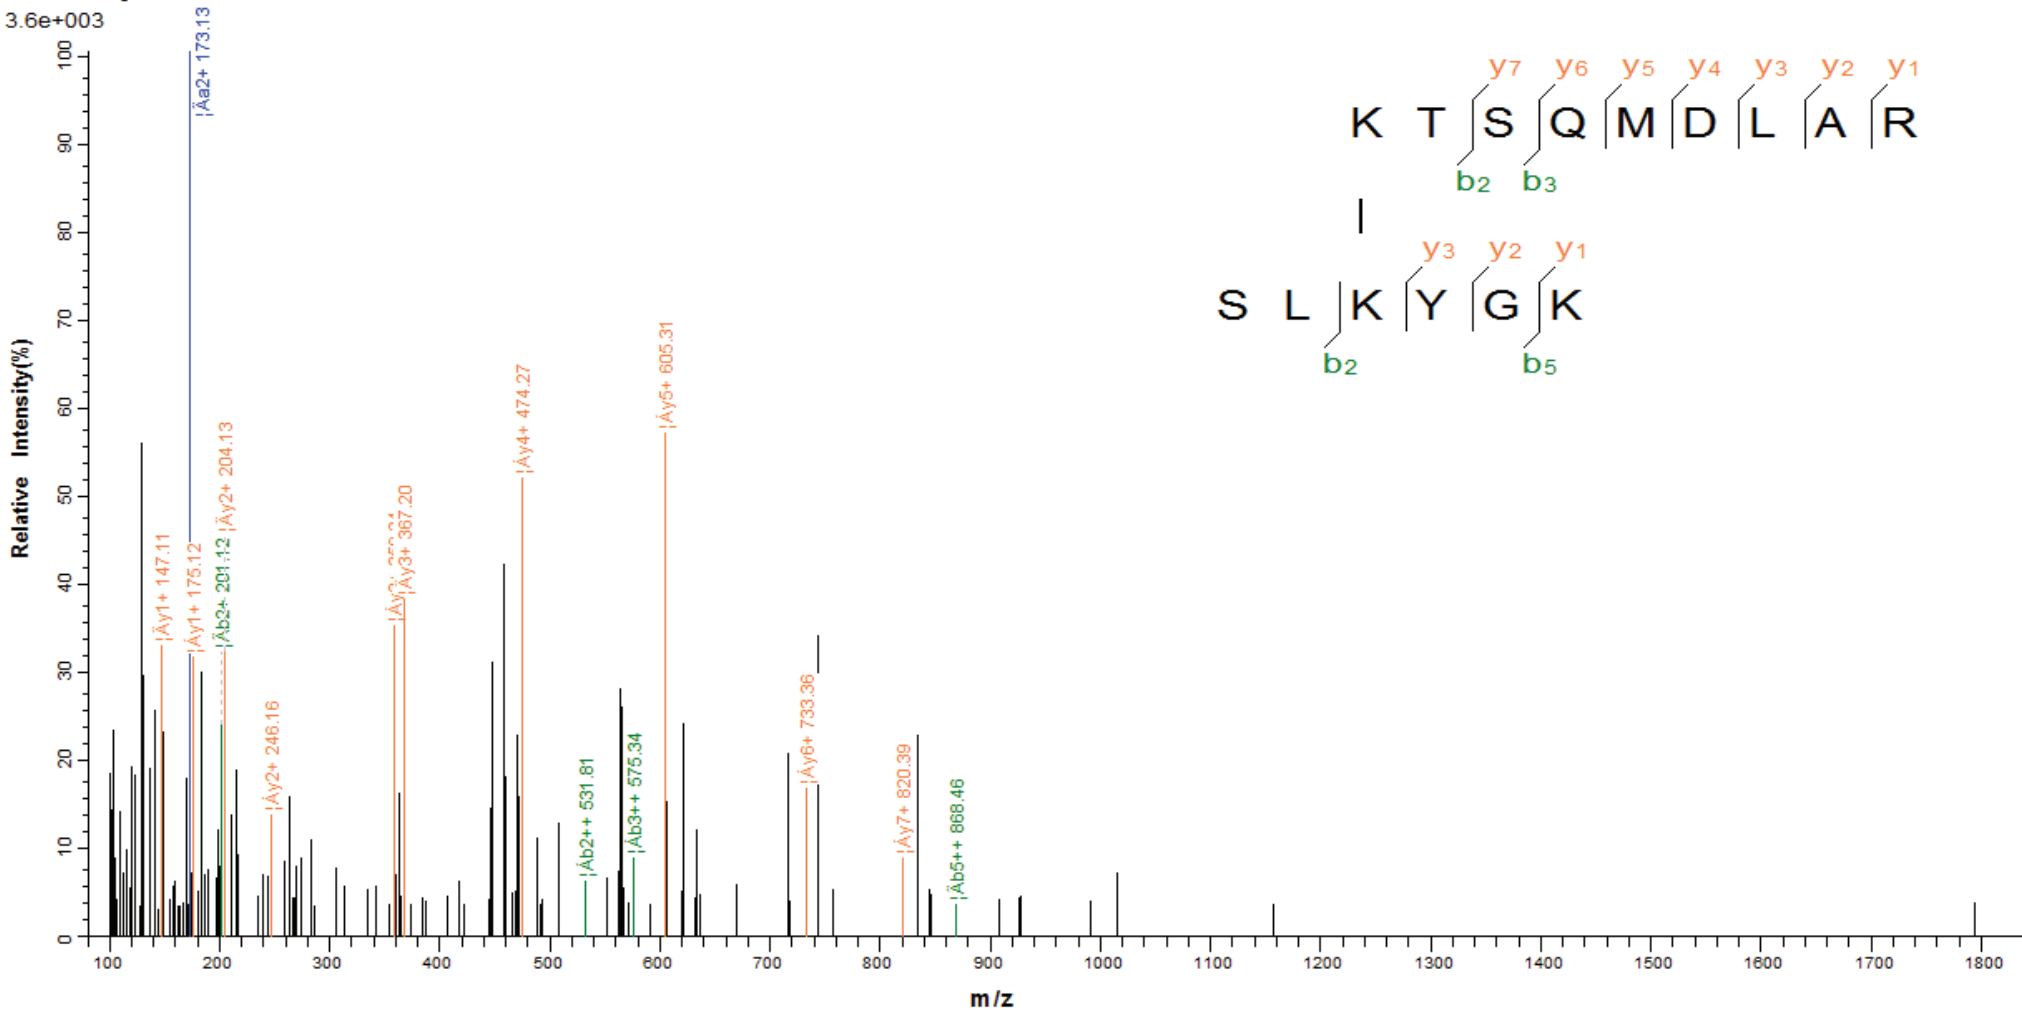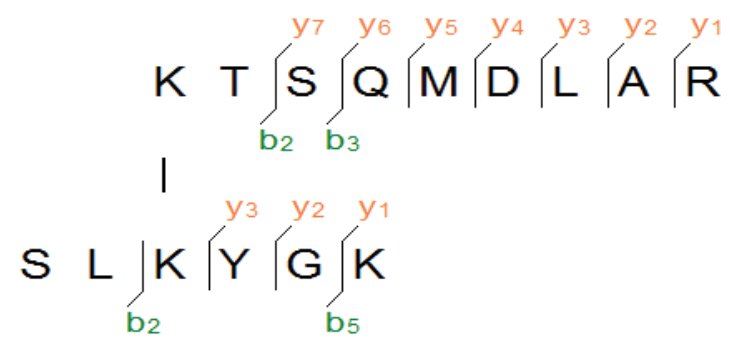

Exosome\_GFP\_test\_A78.002101.002101.5.dta Seq: LLGPAAAKPMAFSNTTTHVPEK-KSTDLTPK Mod: 10,\_Oxidation\_M\_15.995

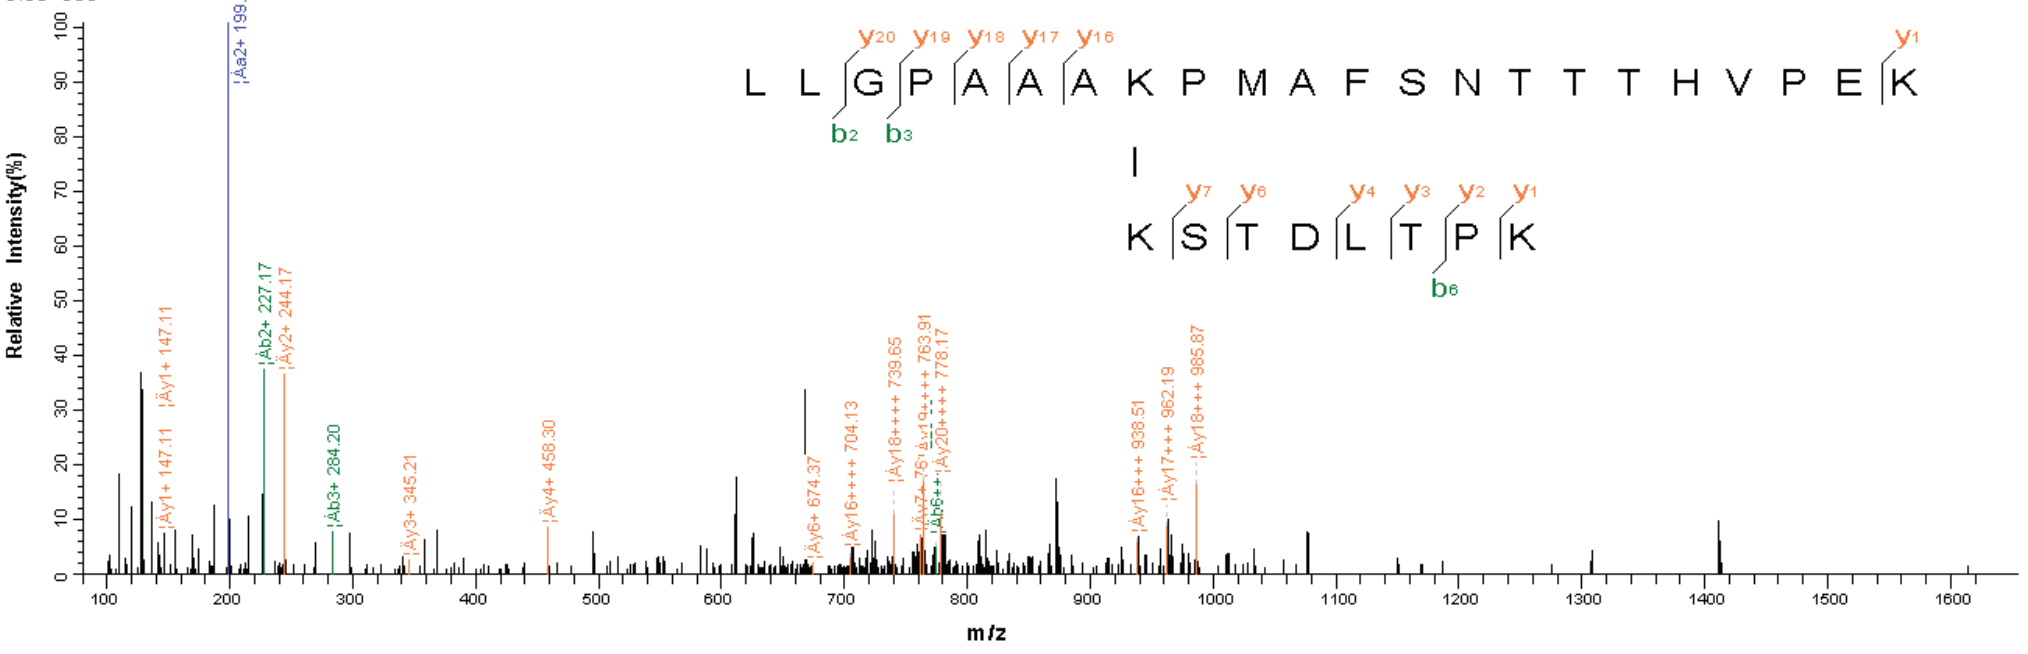



Seq: YSAKYAQDGAGIER-KAFTK

2.3e+003

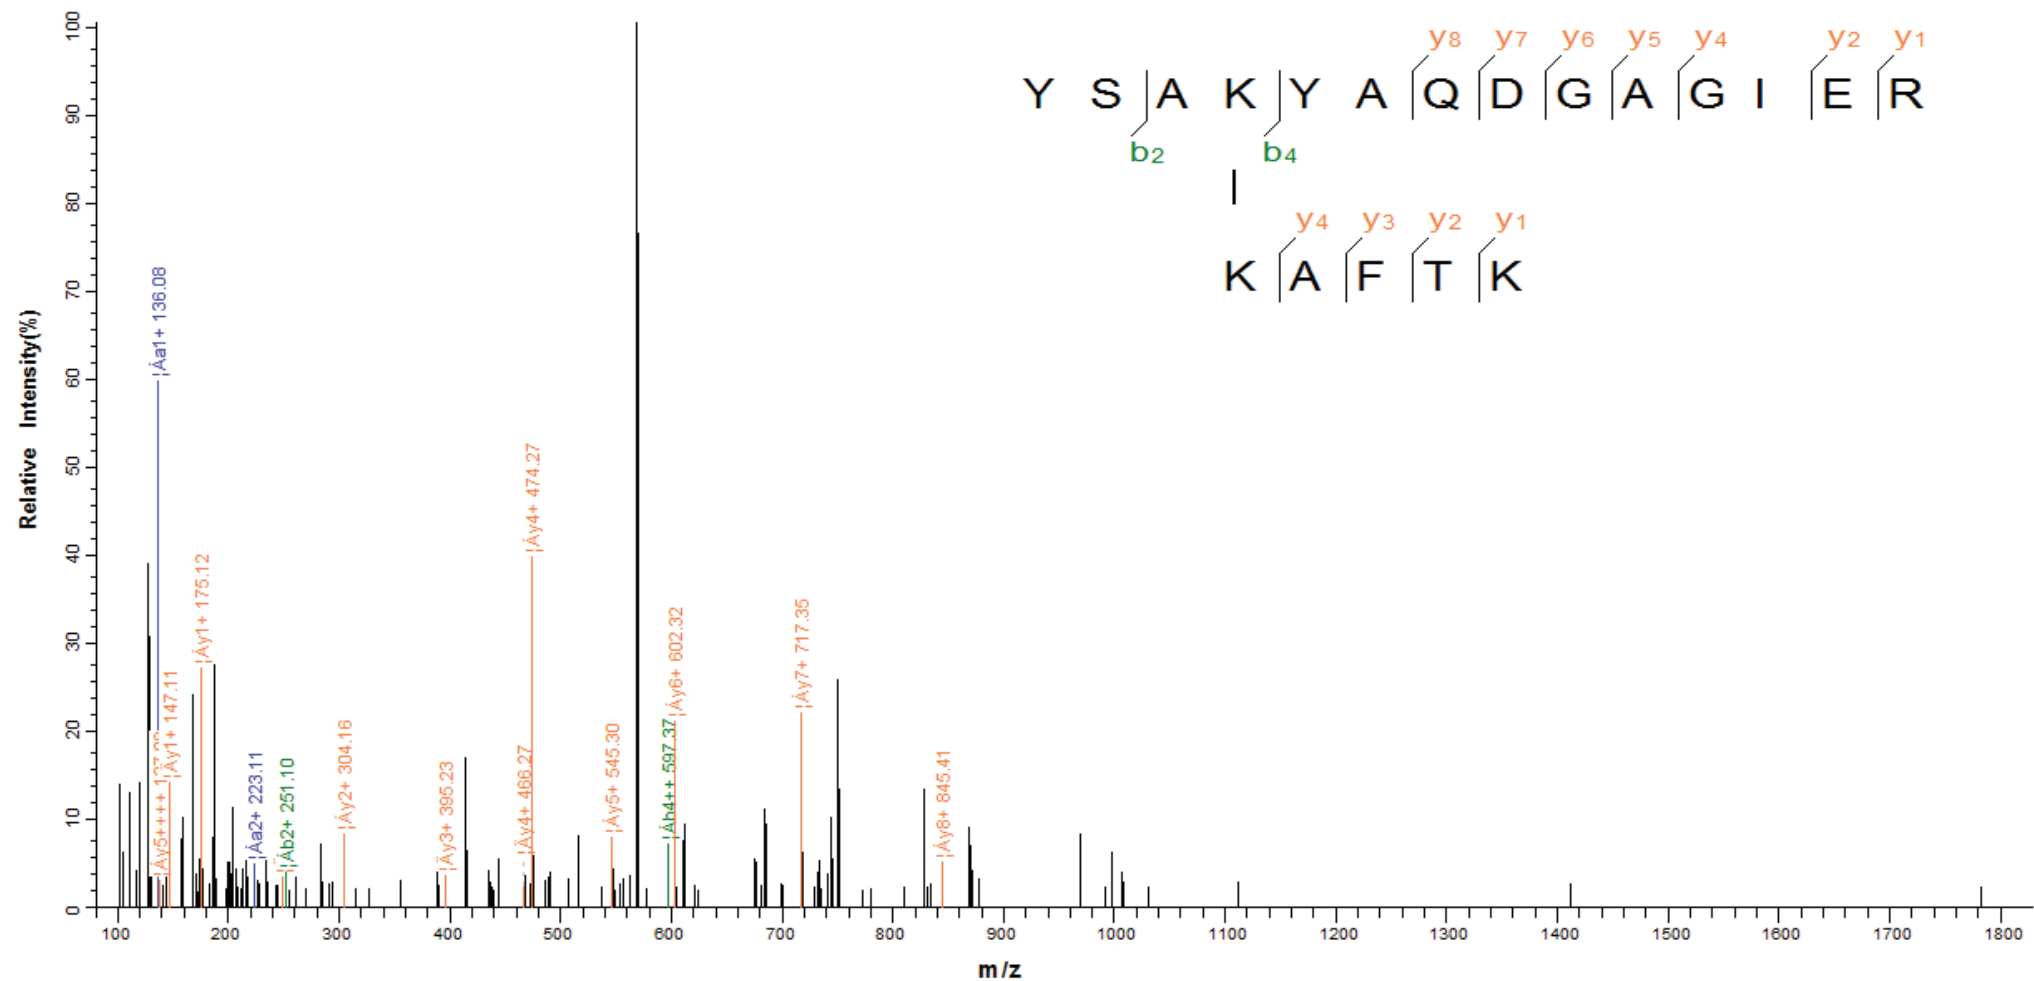

exosome\_A8\_140503145423.3697.3697.4.dta Seq: LLSVIPLKGR-IAEVGNKR

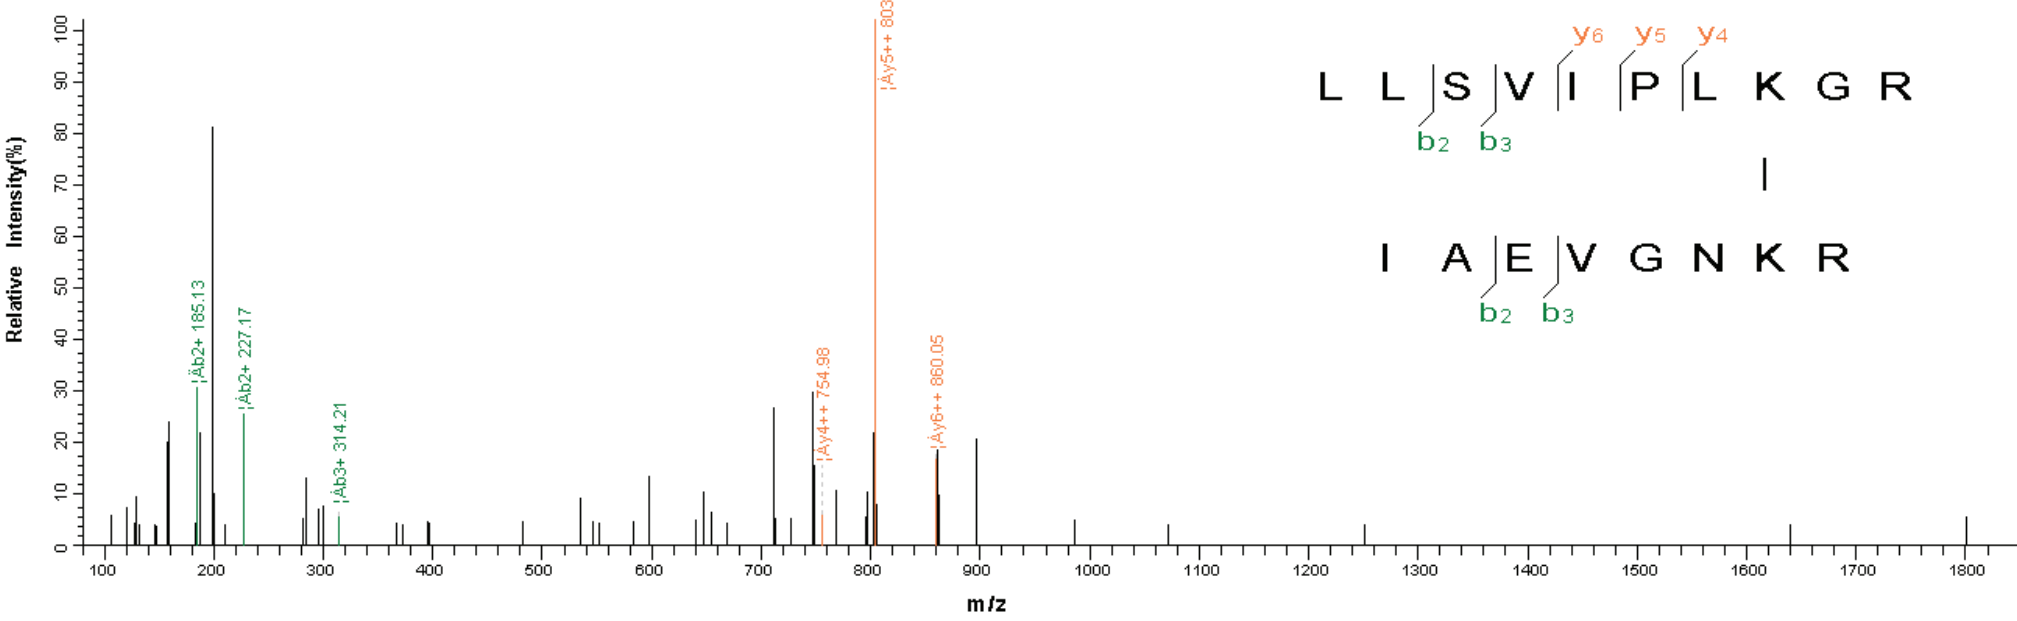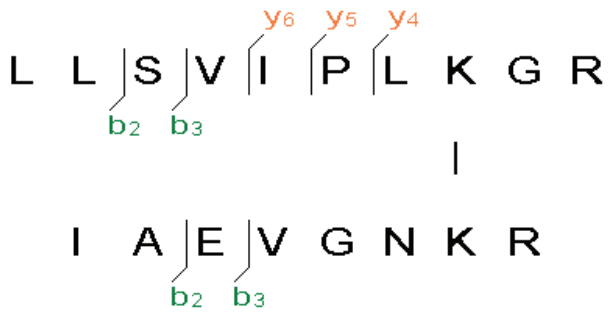

Seq: WKVDIGGK-IAEVGNKR

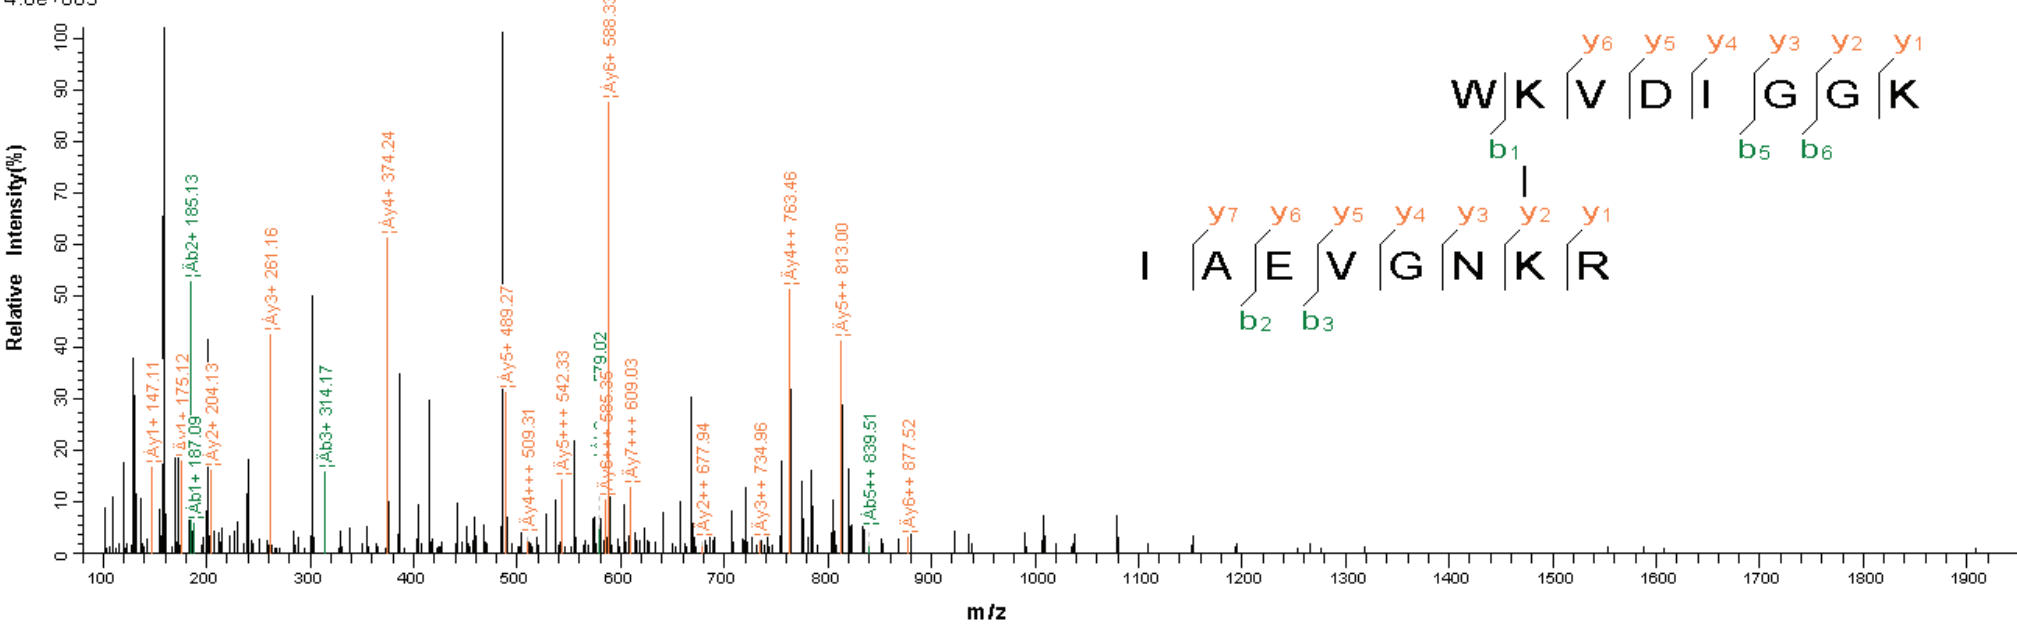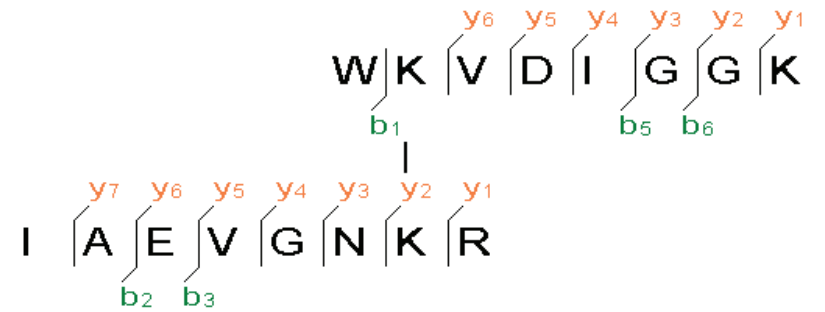

seq: KSESEDELQMR-IAEVGNKR Mod: 9,\_Oxidation\_M\_15.995

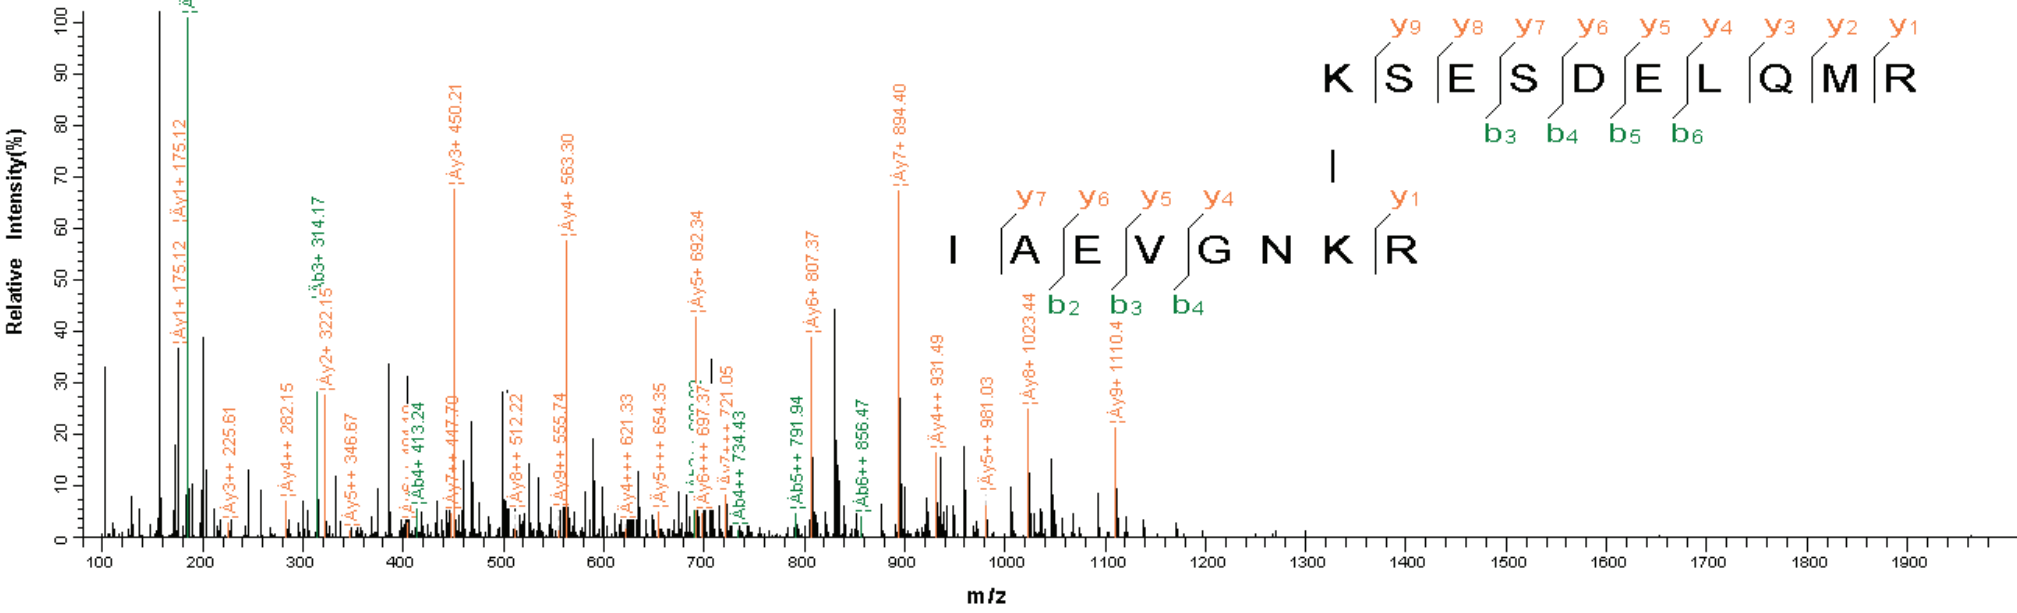

Seq: KSEDELQMR-SLKYGK

4.7e+002

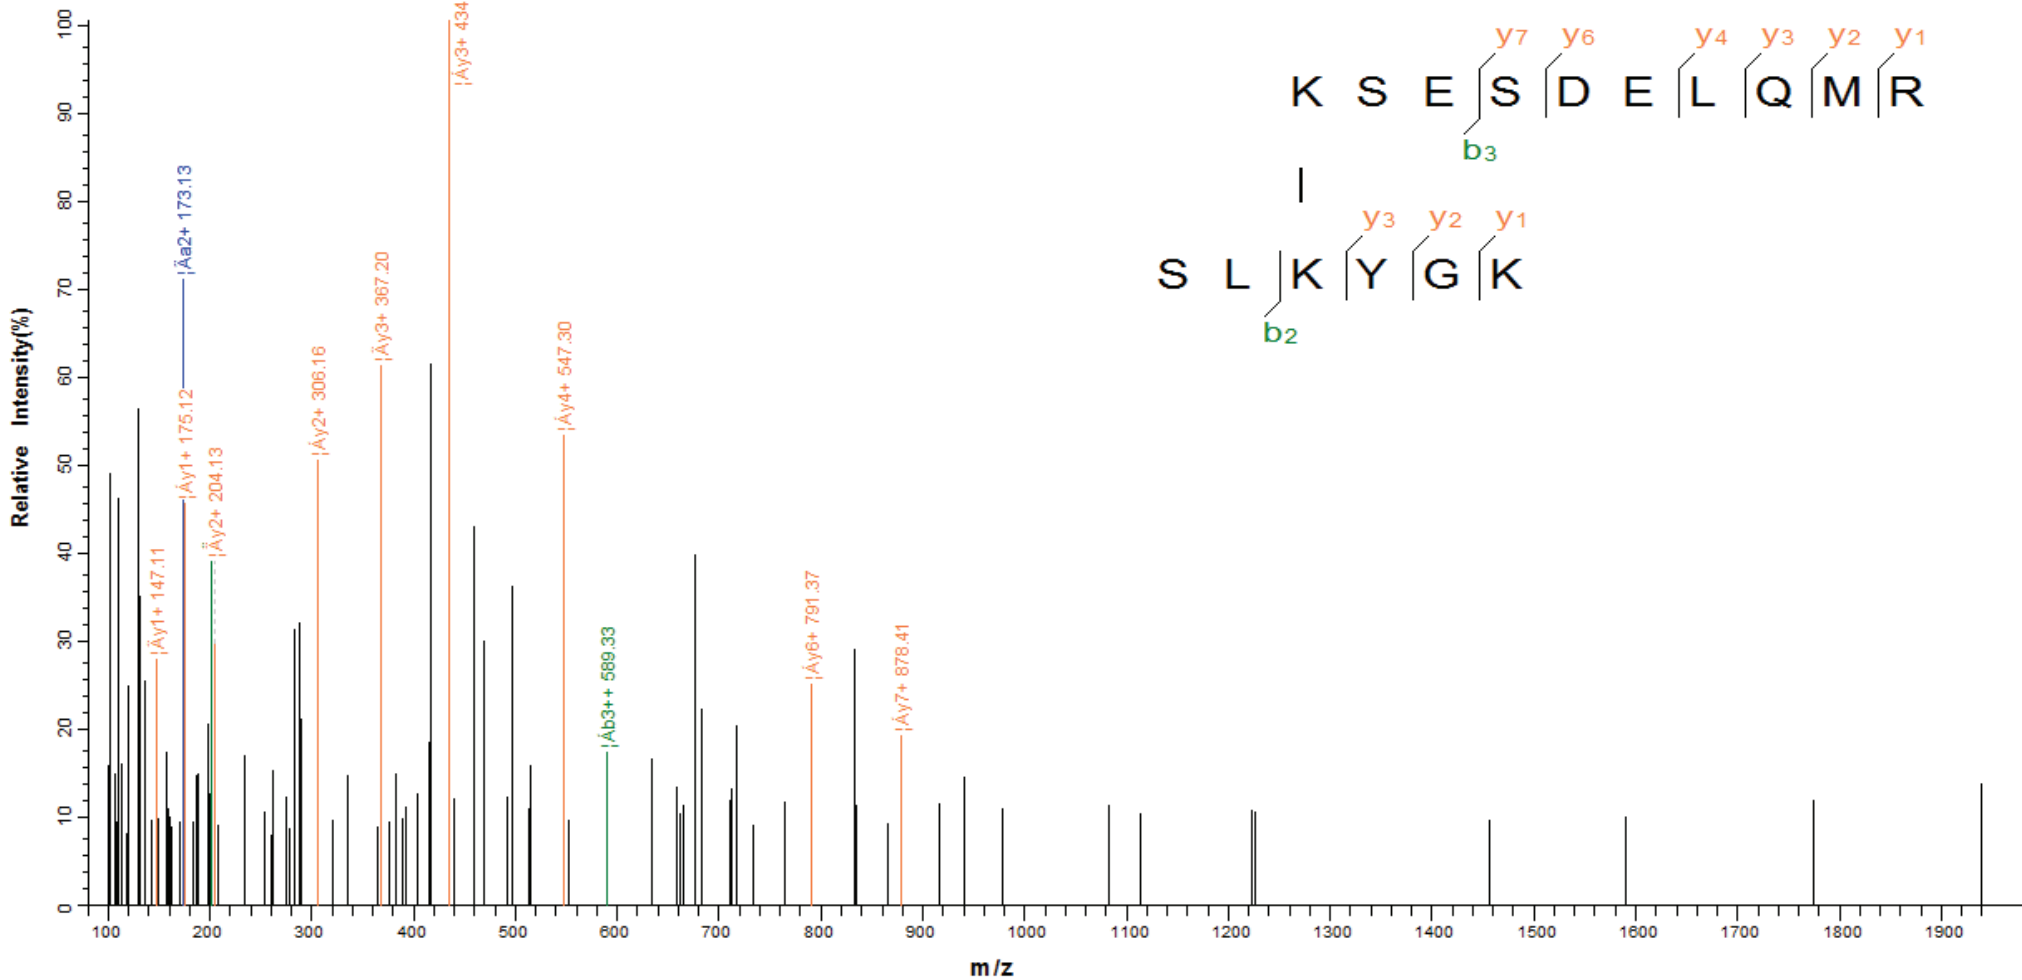

Seq: KTSQMDLAR-SLKYGK

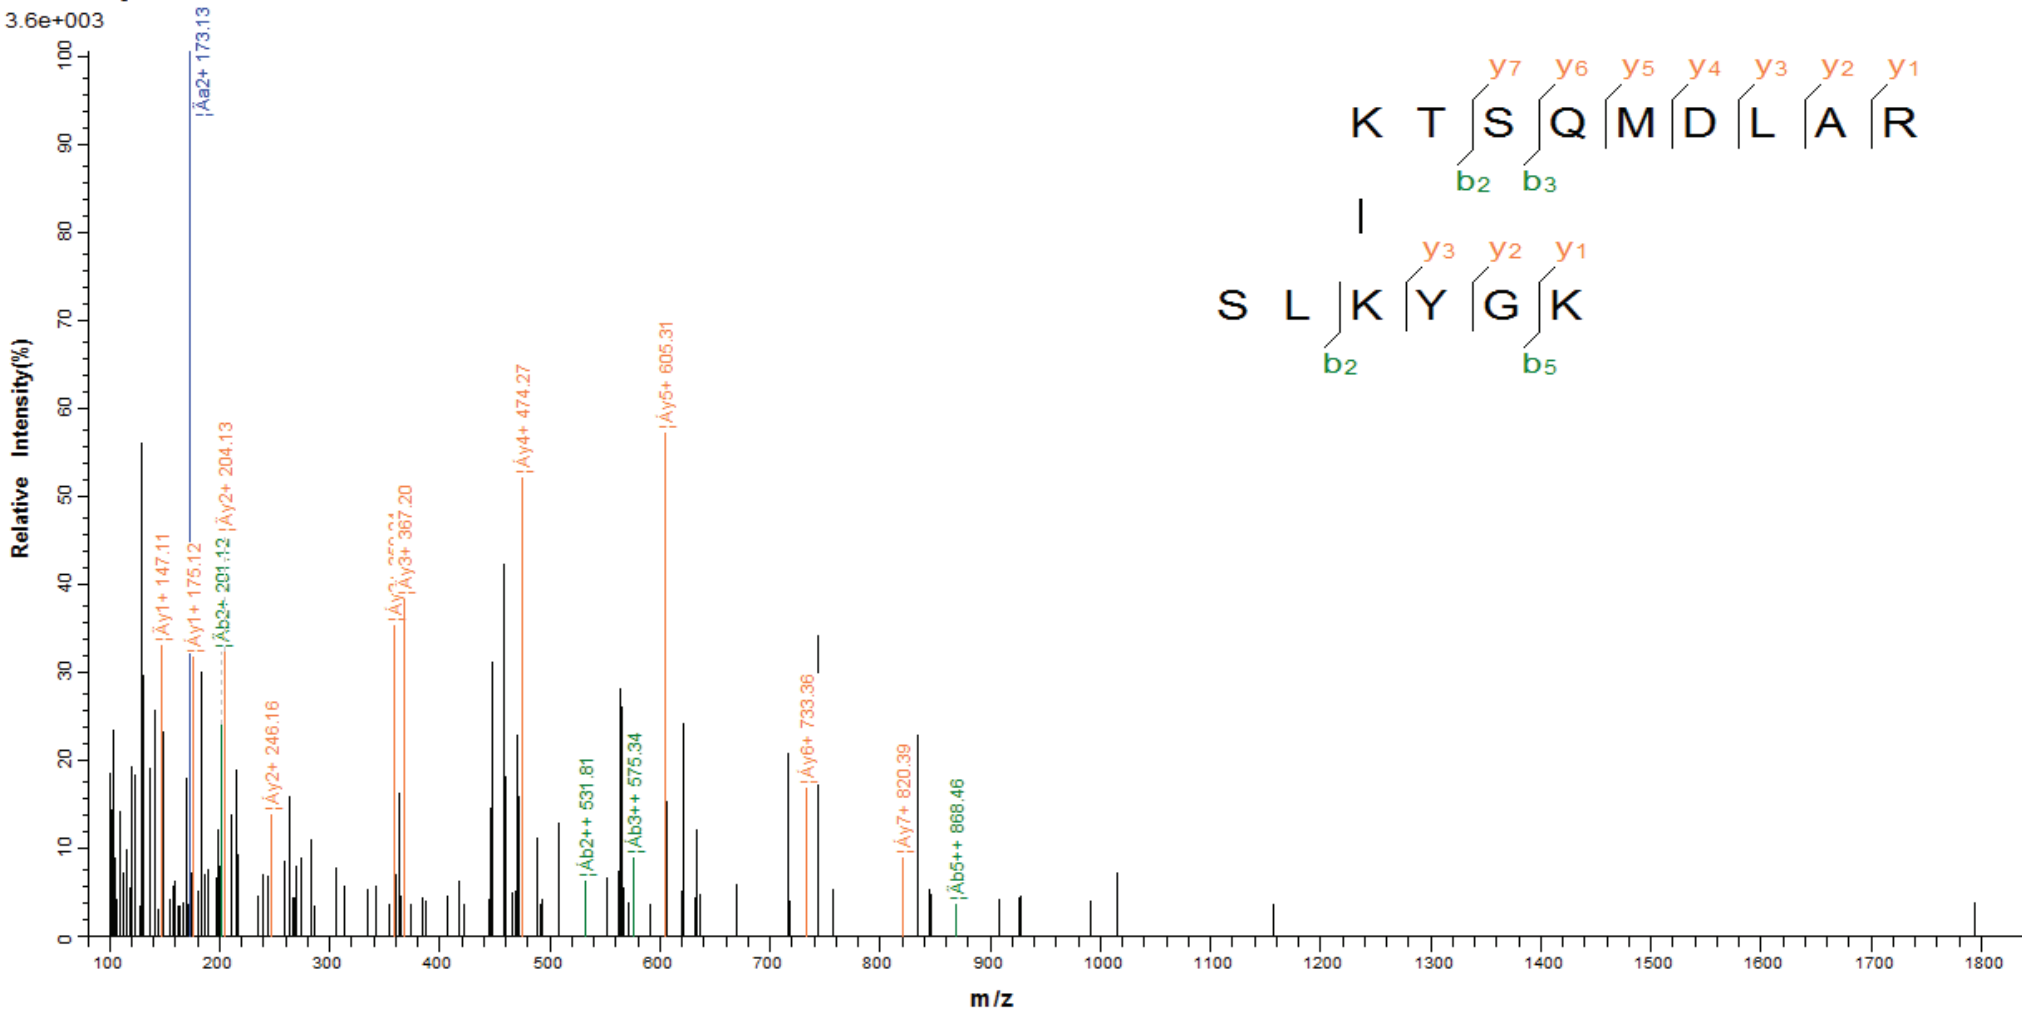

Seq: KTSQMDLAR-YGKLR

3.7e+003

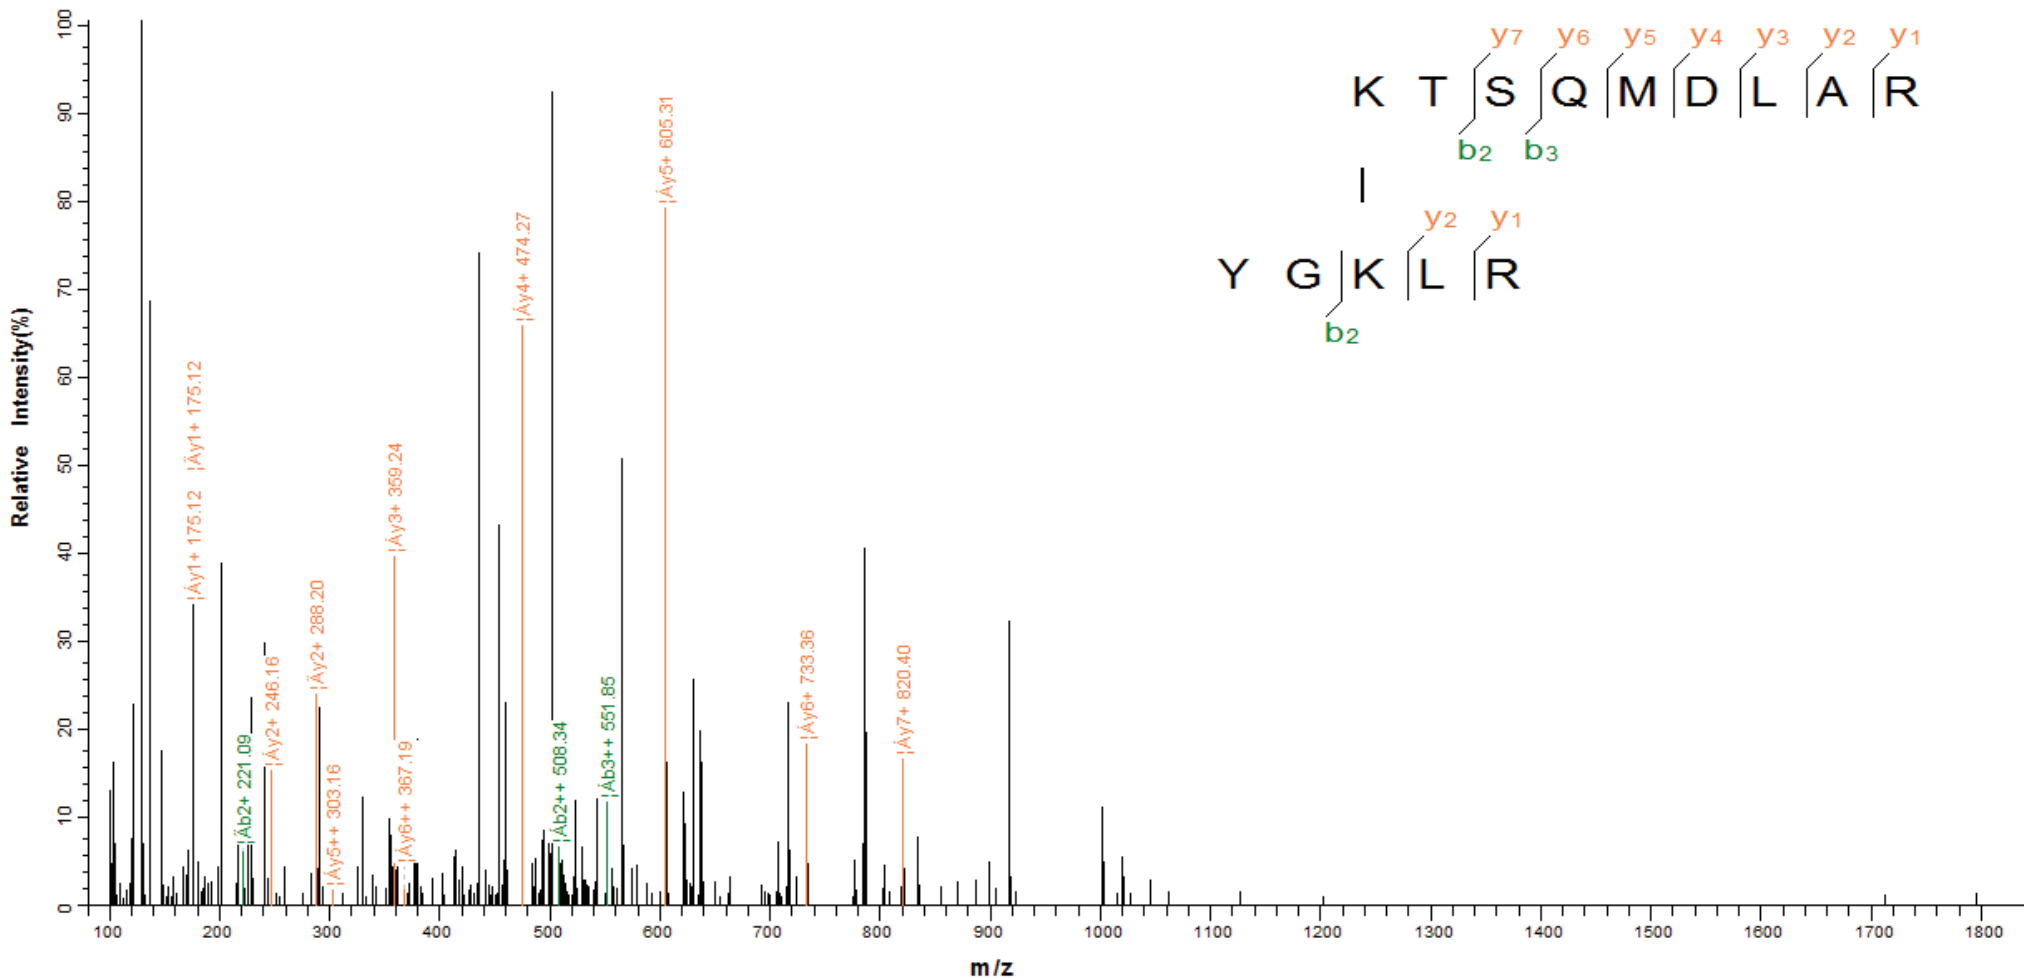

Seq: DTPSANNSSSIKSTGAVSLNPSITR-IAEVGNKR

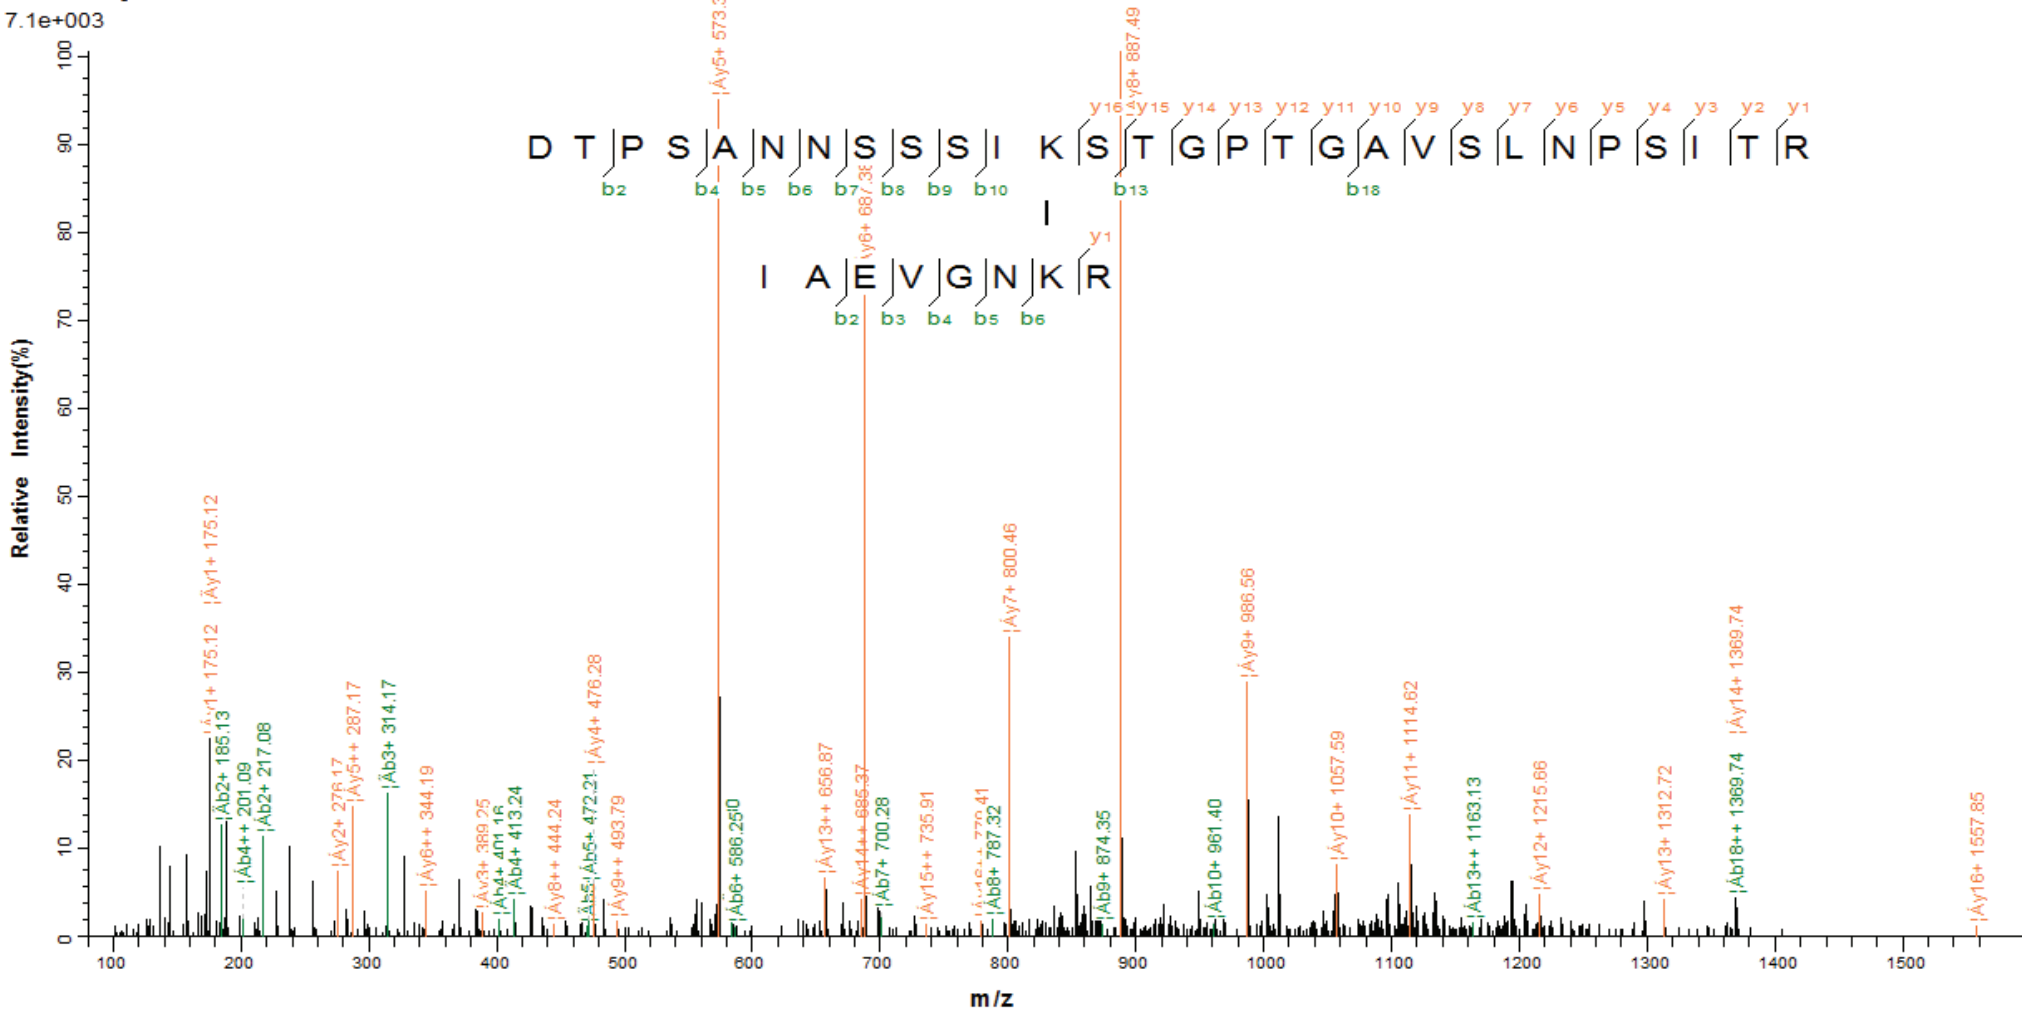



Seq: DTPSANSSSIKSTGPTGAVSLNPSITR-KSEDELQMR

2.6e+003

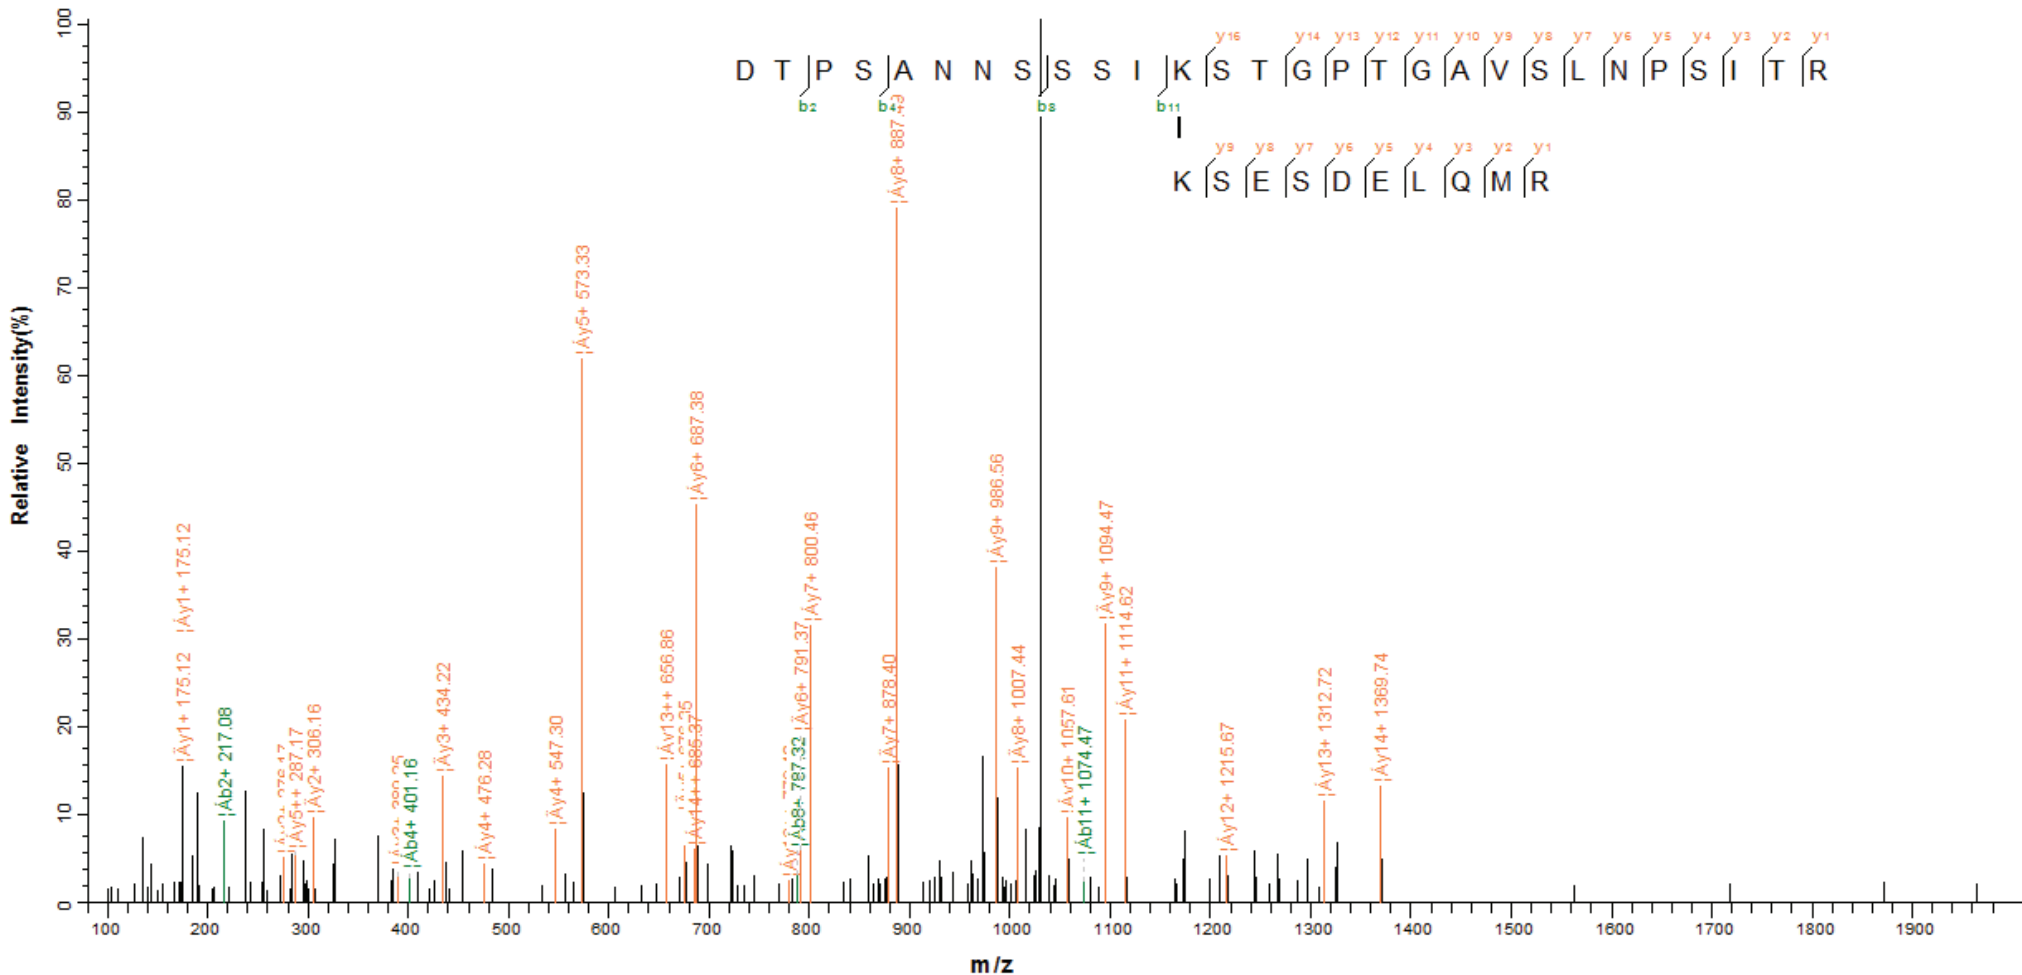

Seq: DTPSANNSSSIKSTGPTGAVSLNPSITR-KTSQMDLAR

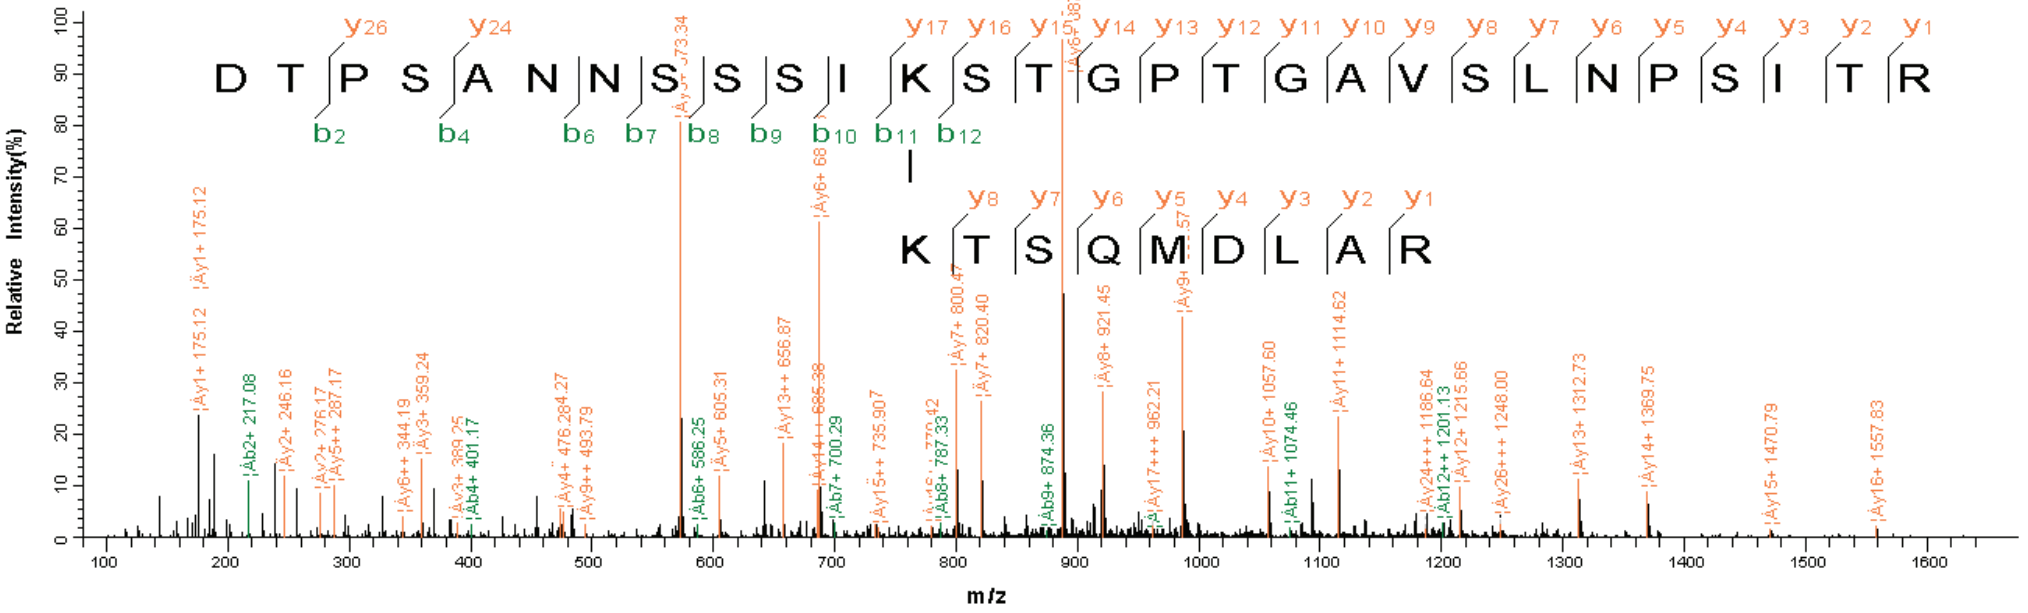

seq: KNRPTLQVGLVYAR-IAEVGNKR

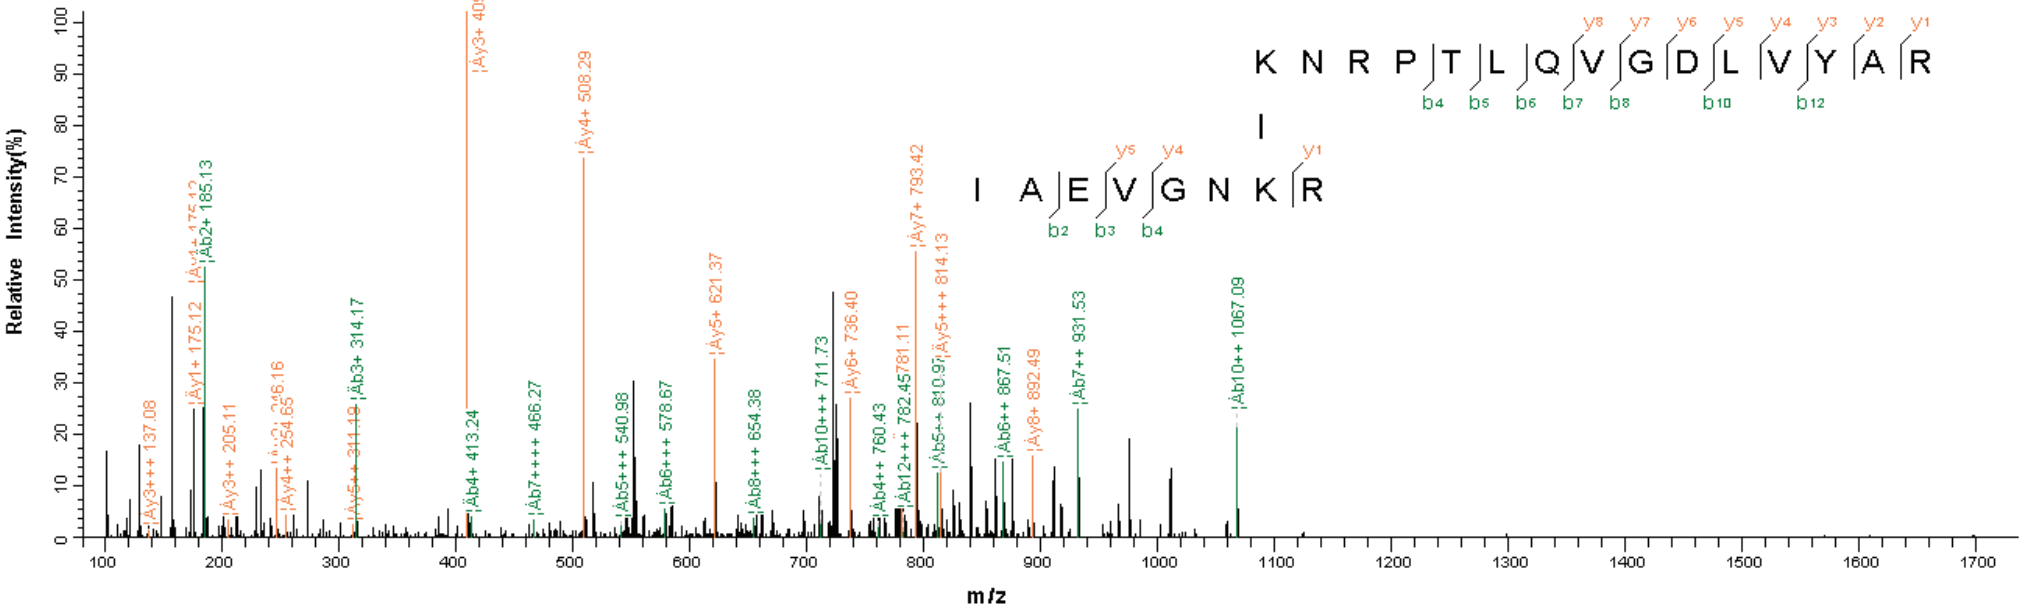

Seq: QLLFNNDFFLLKVLAAHTK-NDTAAFKDIAK

1.3e+004

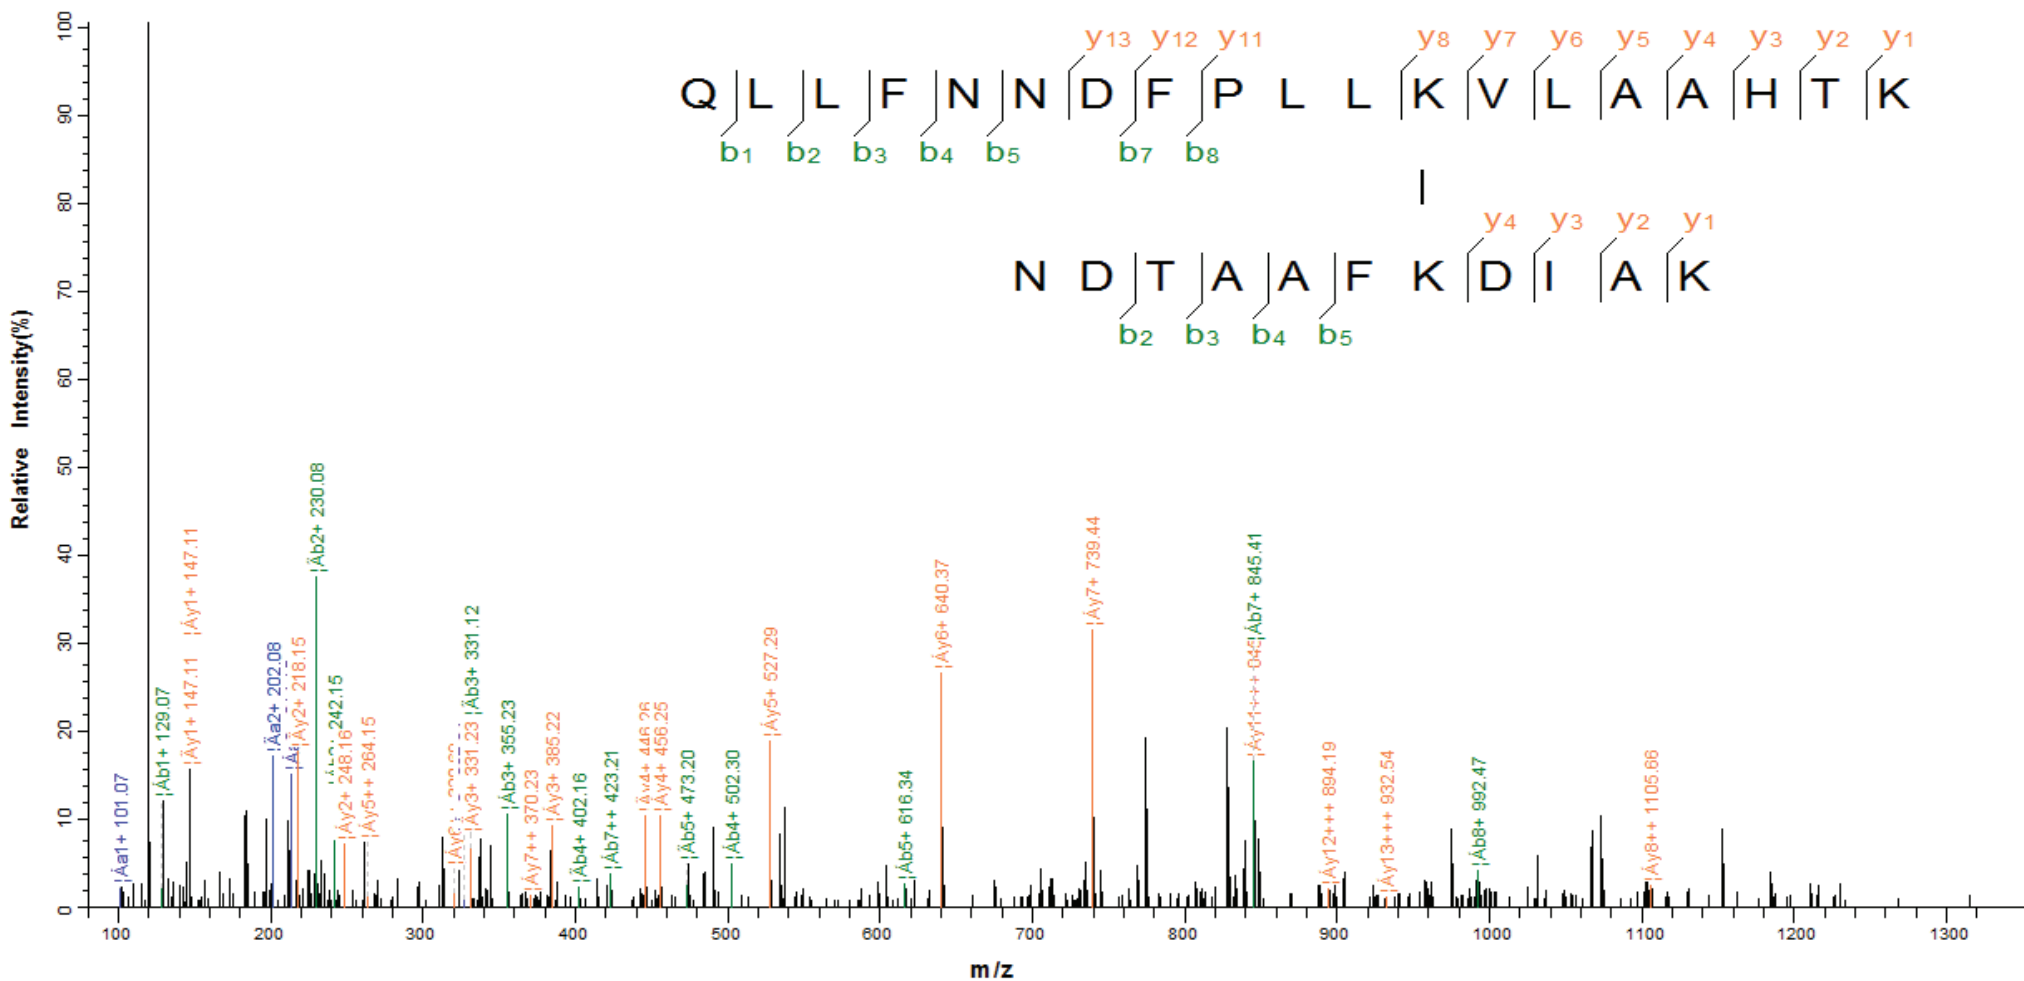

Seq: TIMECCQKNDTAAFK-DIAKR Mod: 5,C\_57 6,C\_57

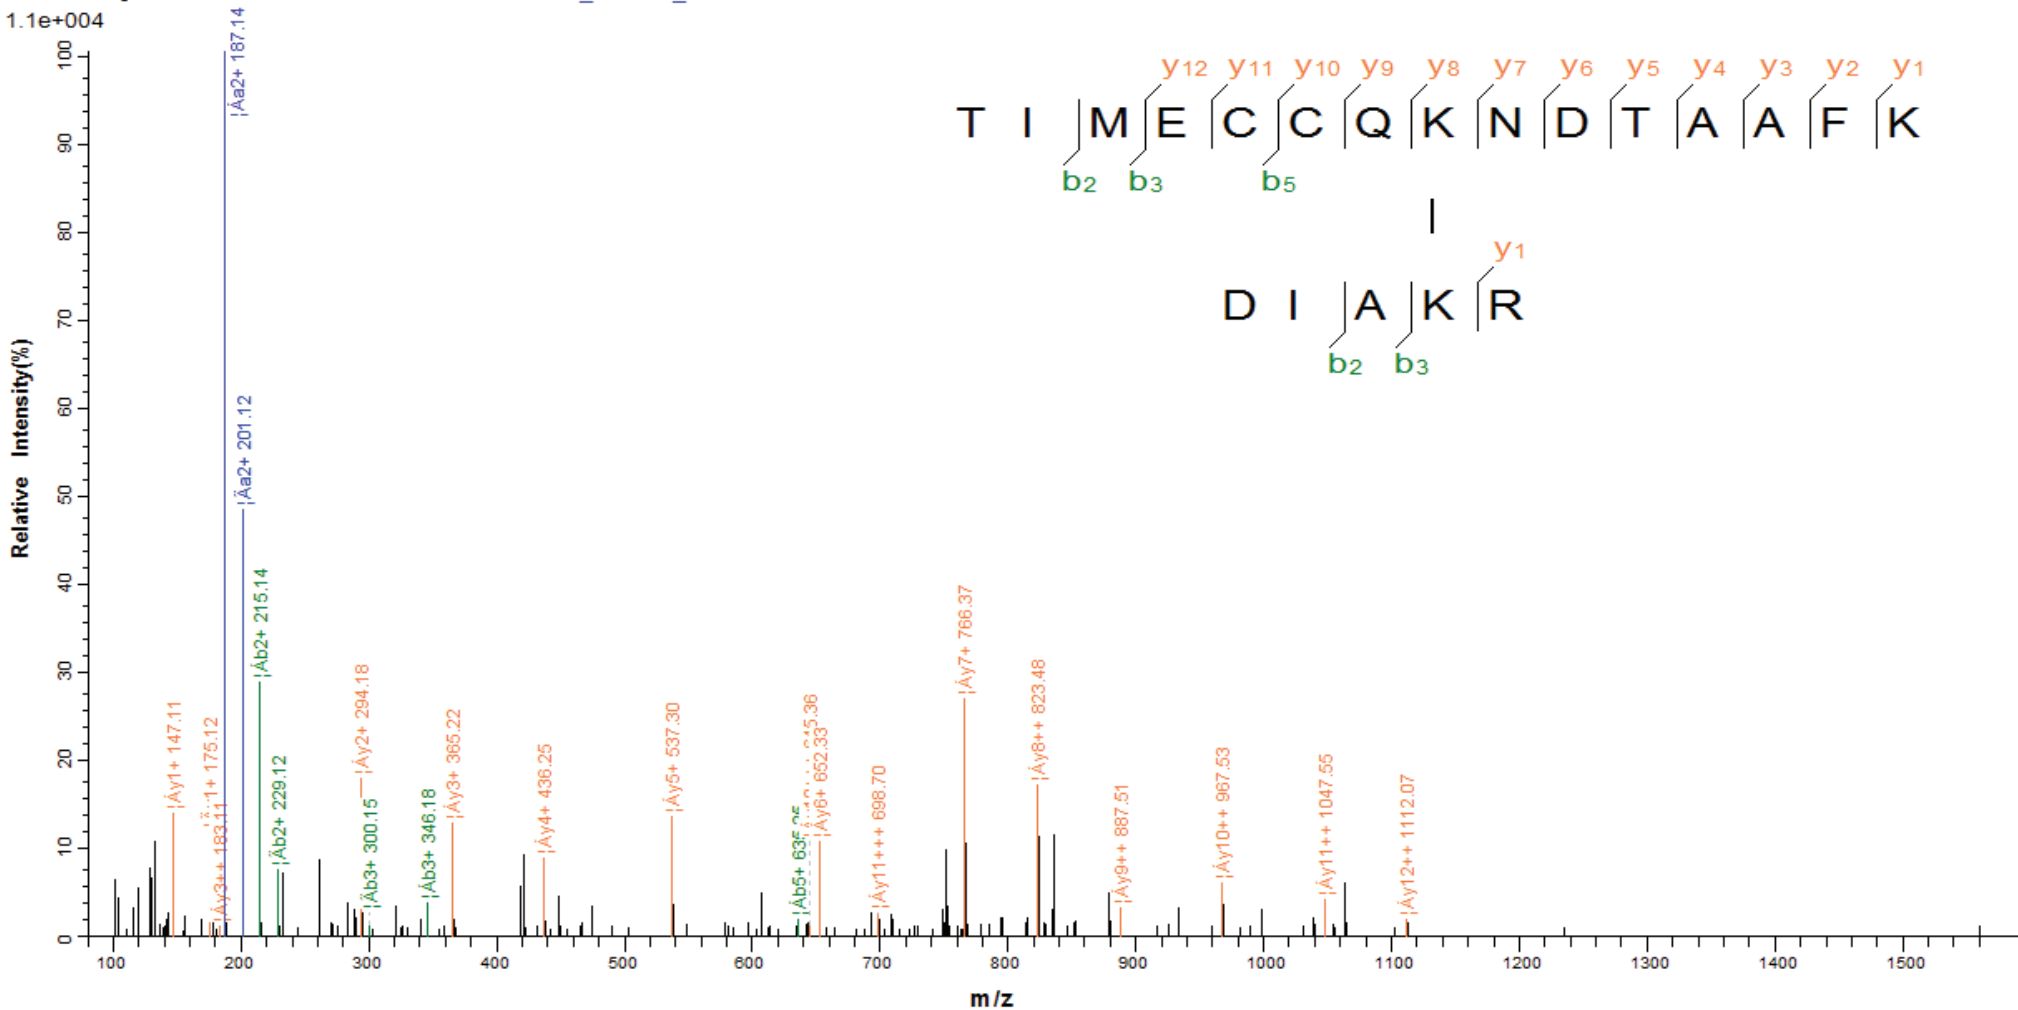

Seq: QFKEILTVKKE-DIAKR

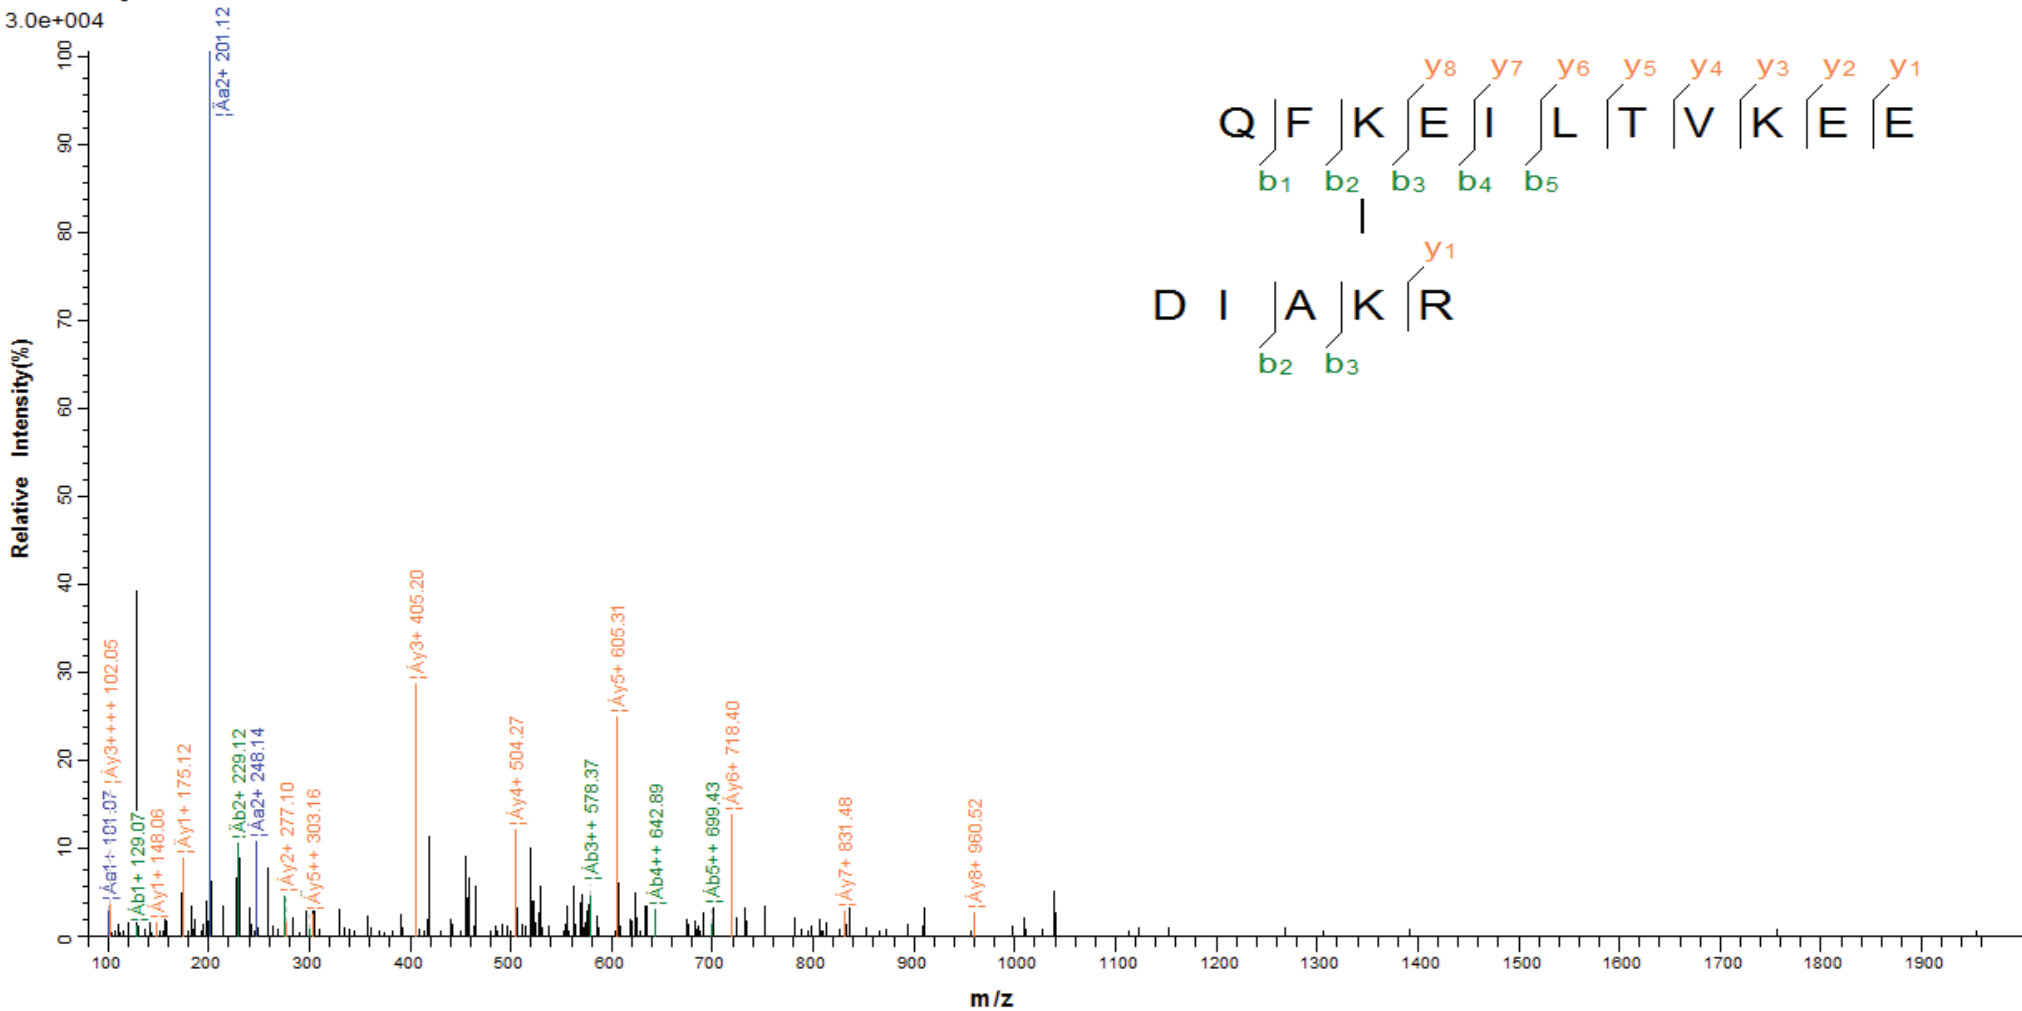

Seq: SANEDGTFVLYPDELDDTLNETNLKMK-VKAGVR

5.0e+003

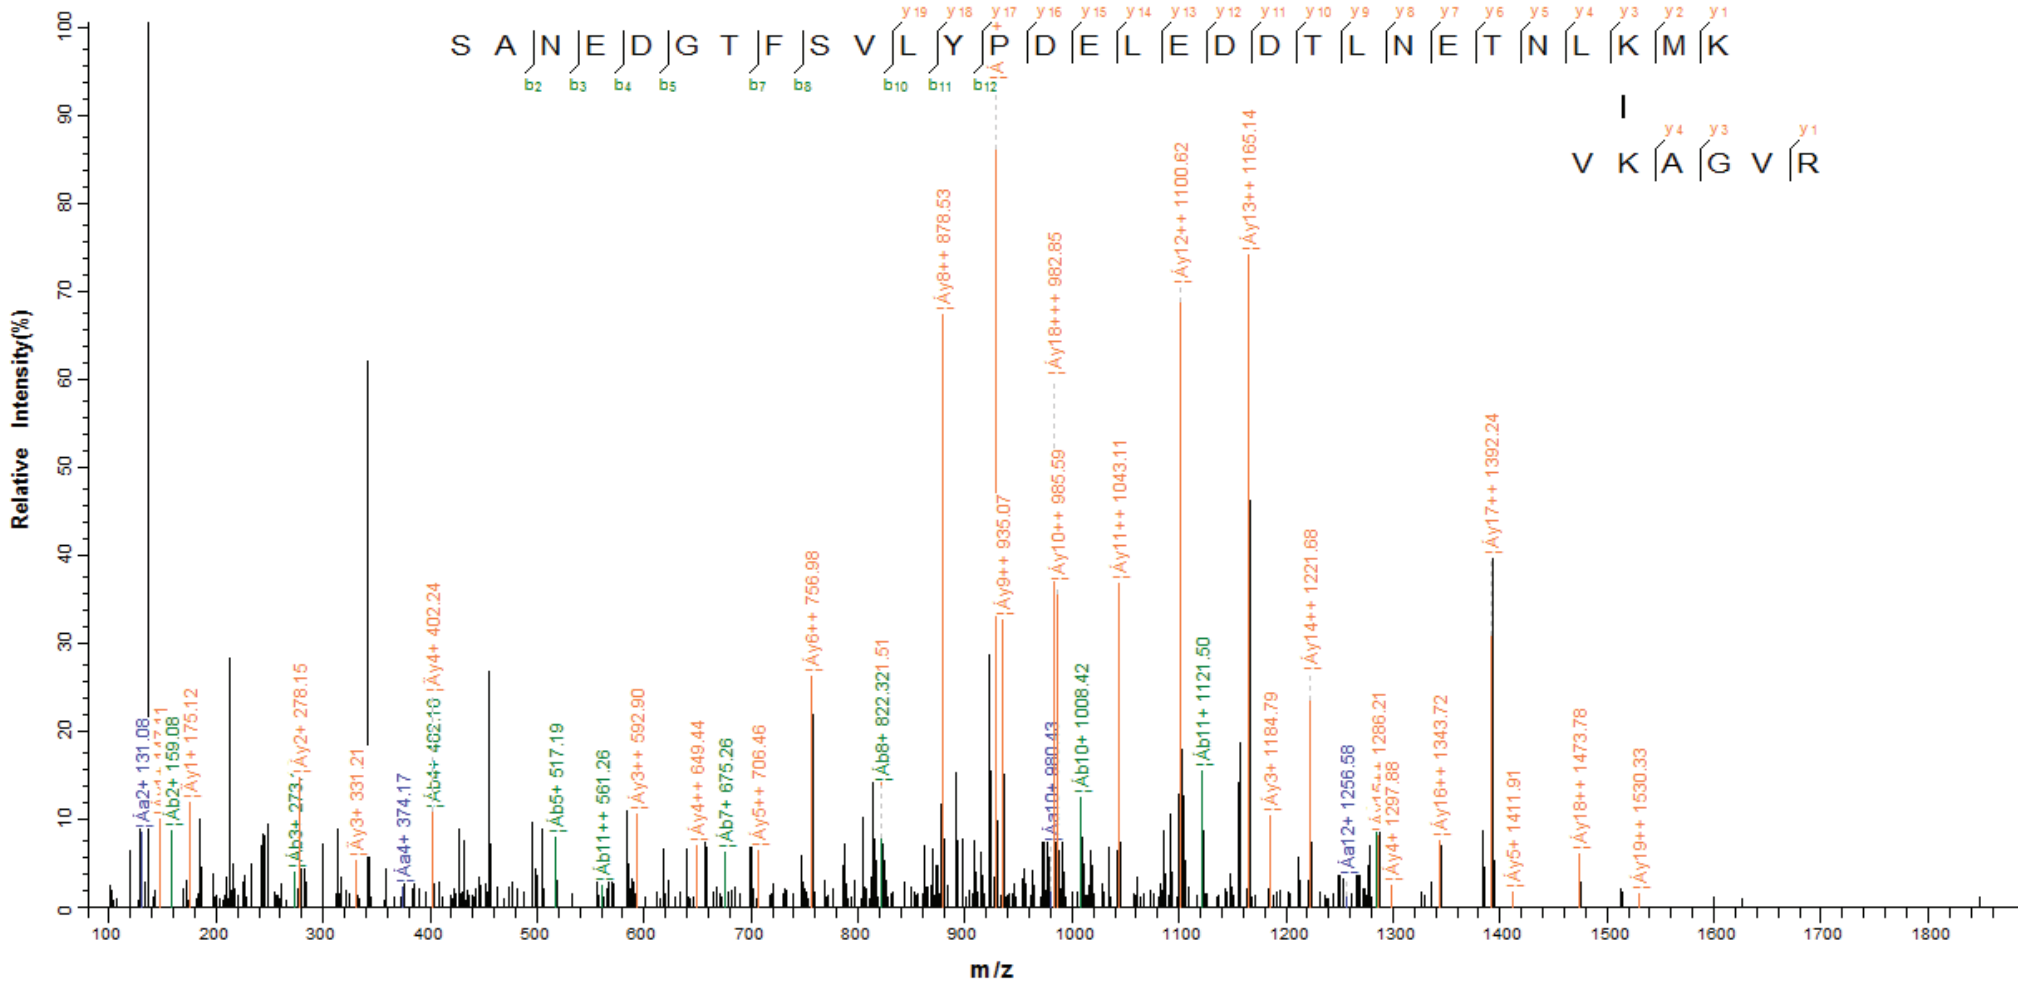

Seq: KWSYVLYAK-VKAGVR

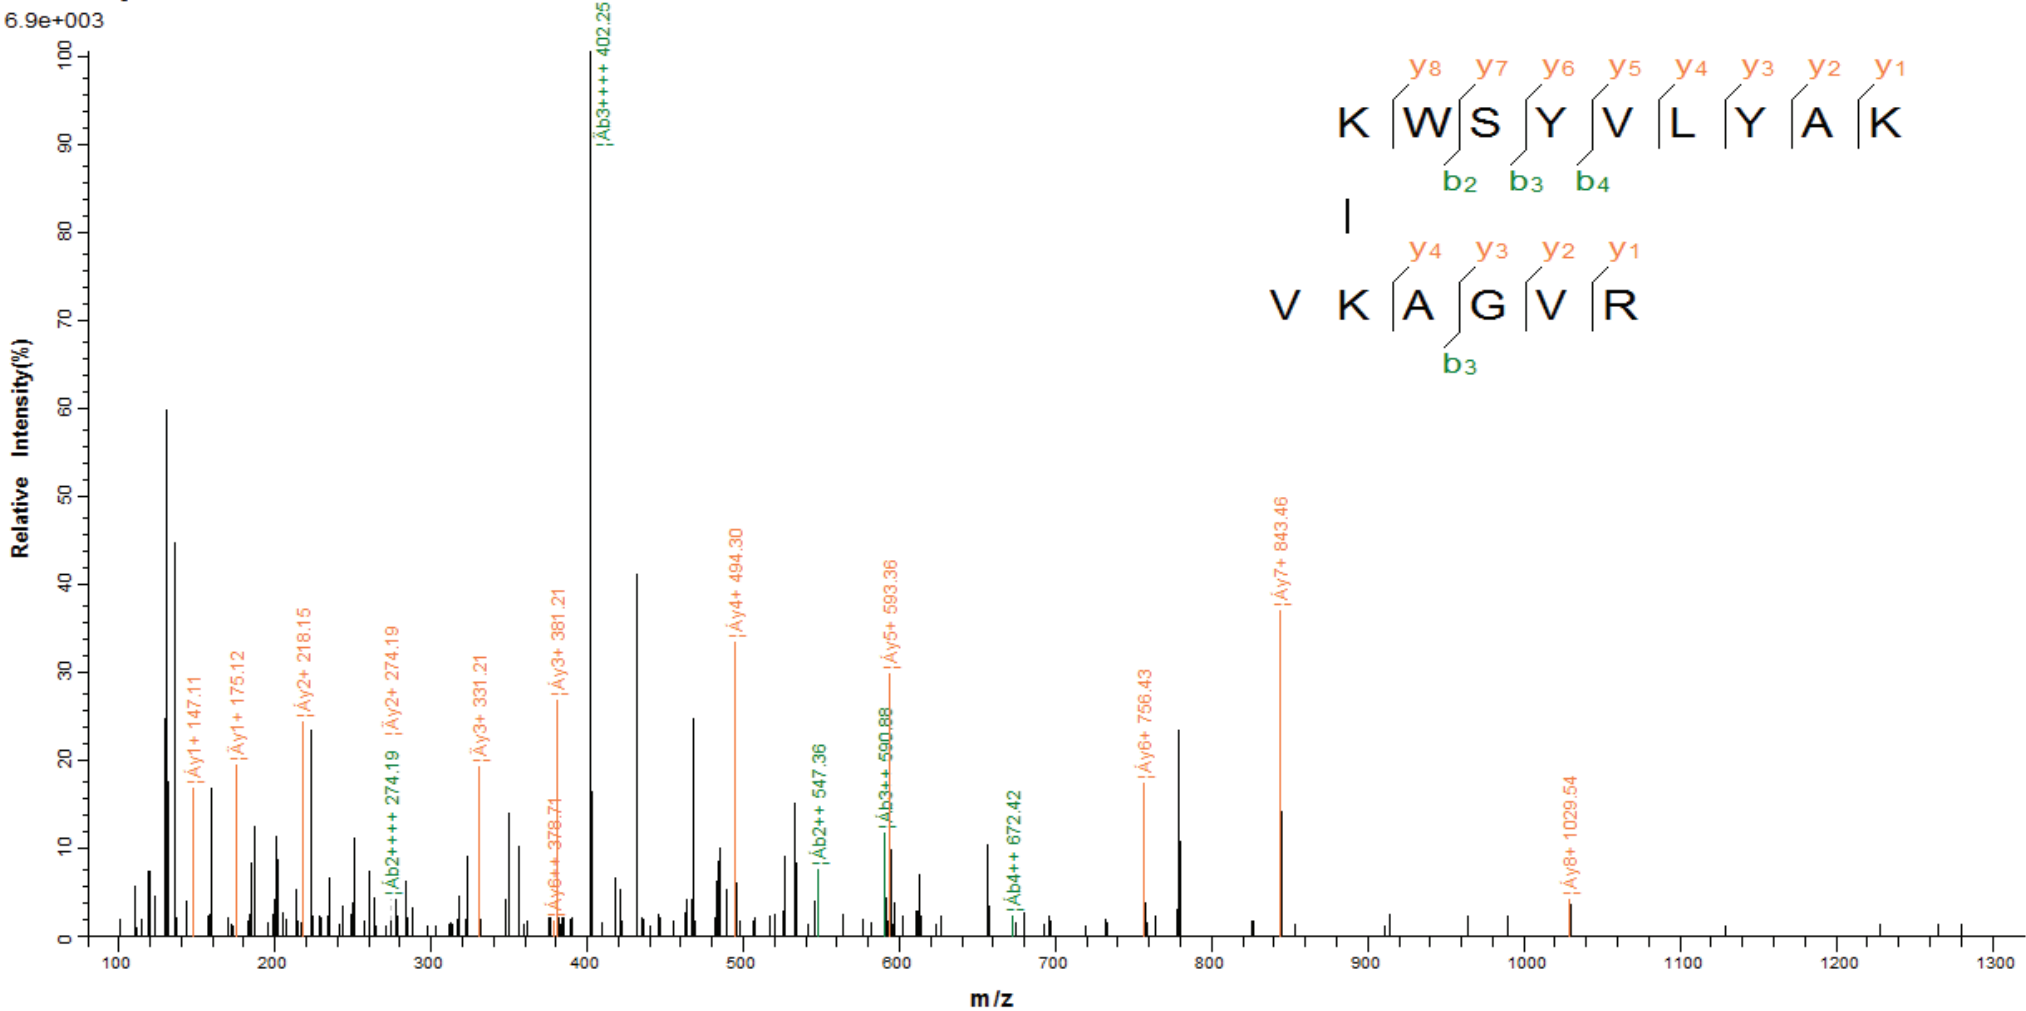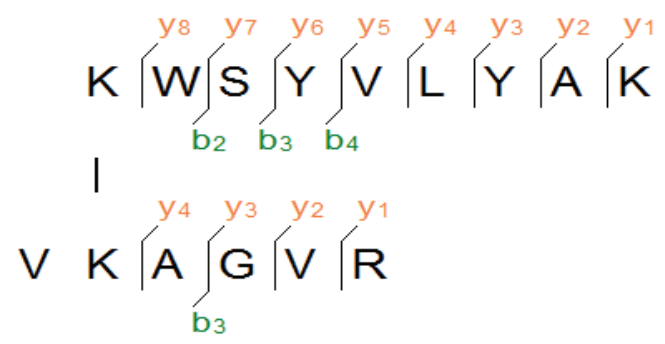



Seq: ETYEII CDQTKSVPLMINAK-VKAGVR Mod: 7,C\_57

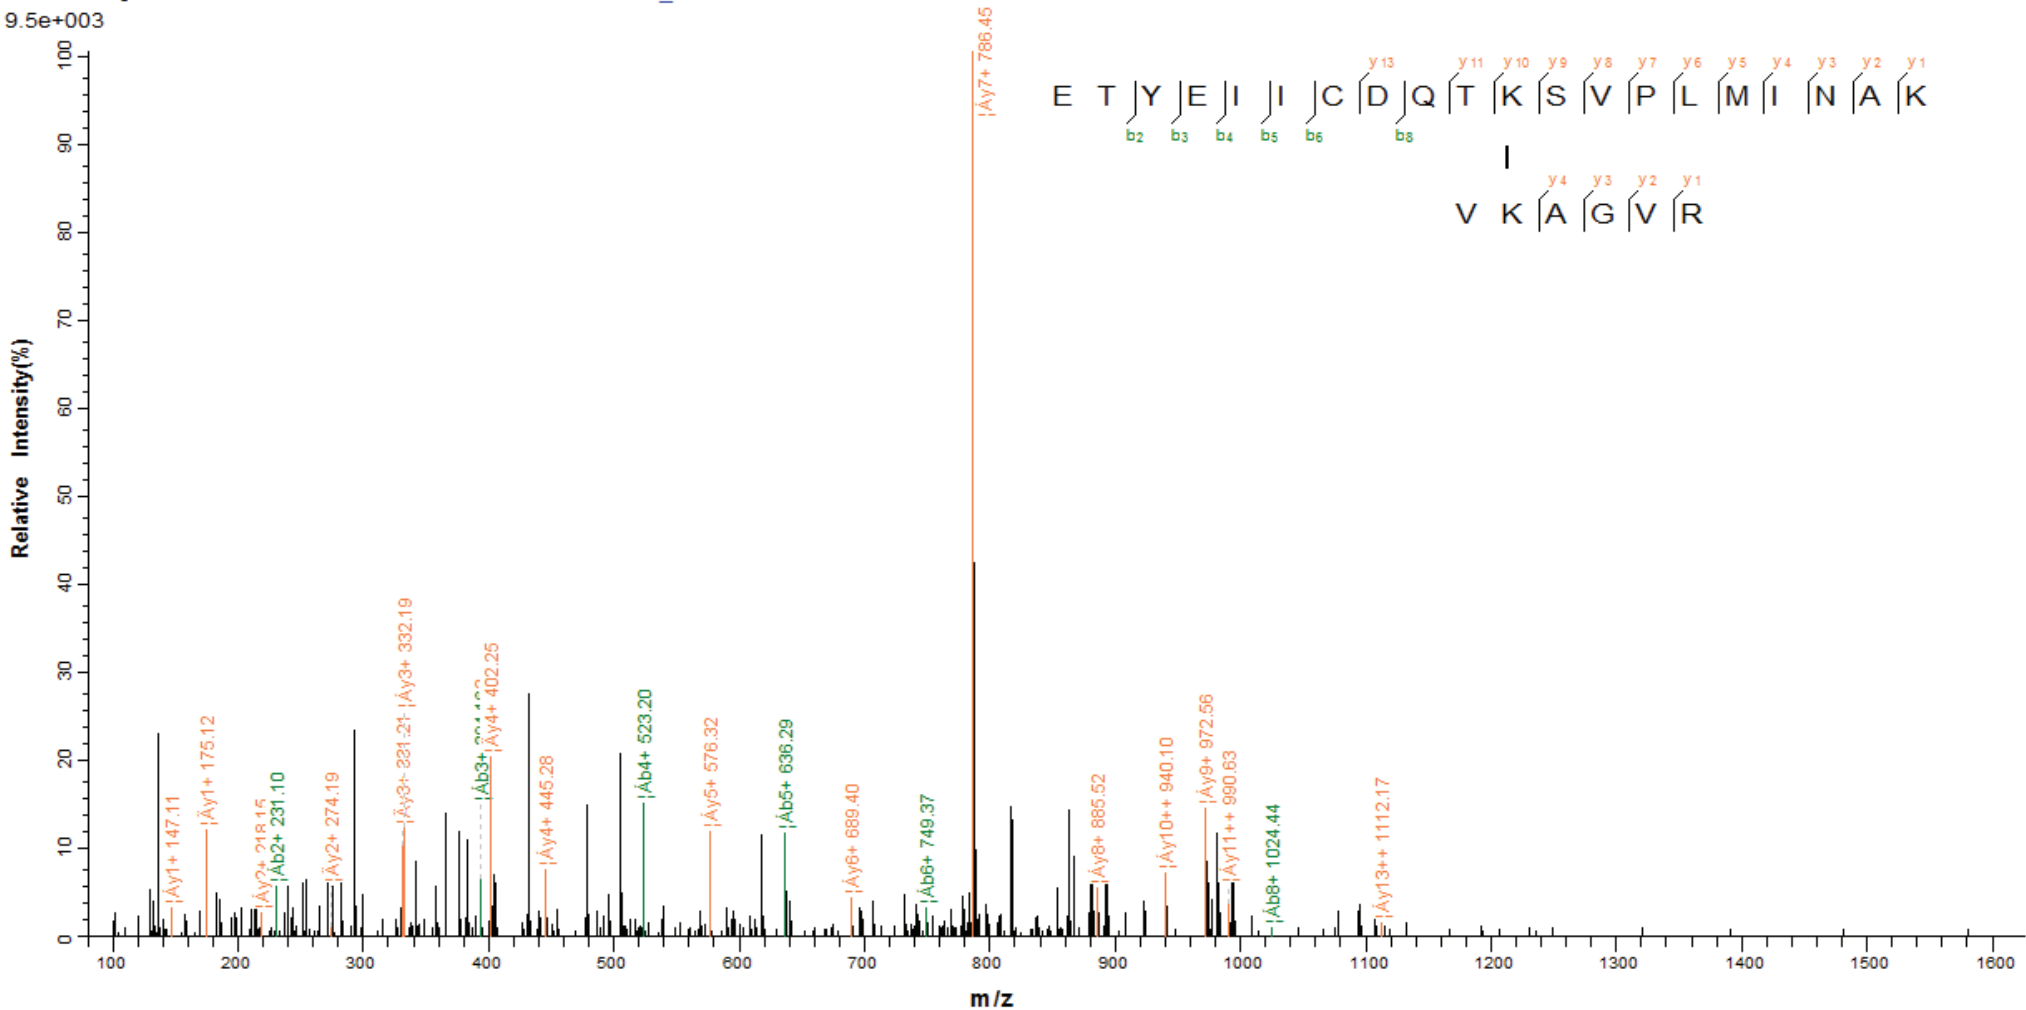

Exosome\_GFP\_test\_A78.003576.003576.5.dta Seq: ITDQLQLLKEDSEK-DGVLTVTLNKR

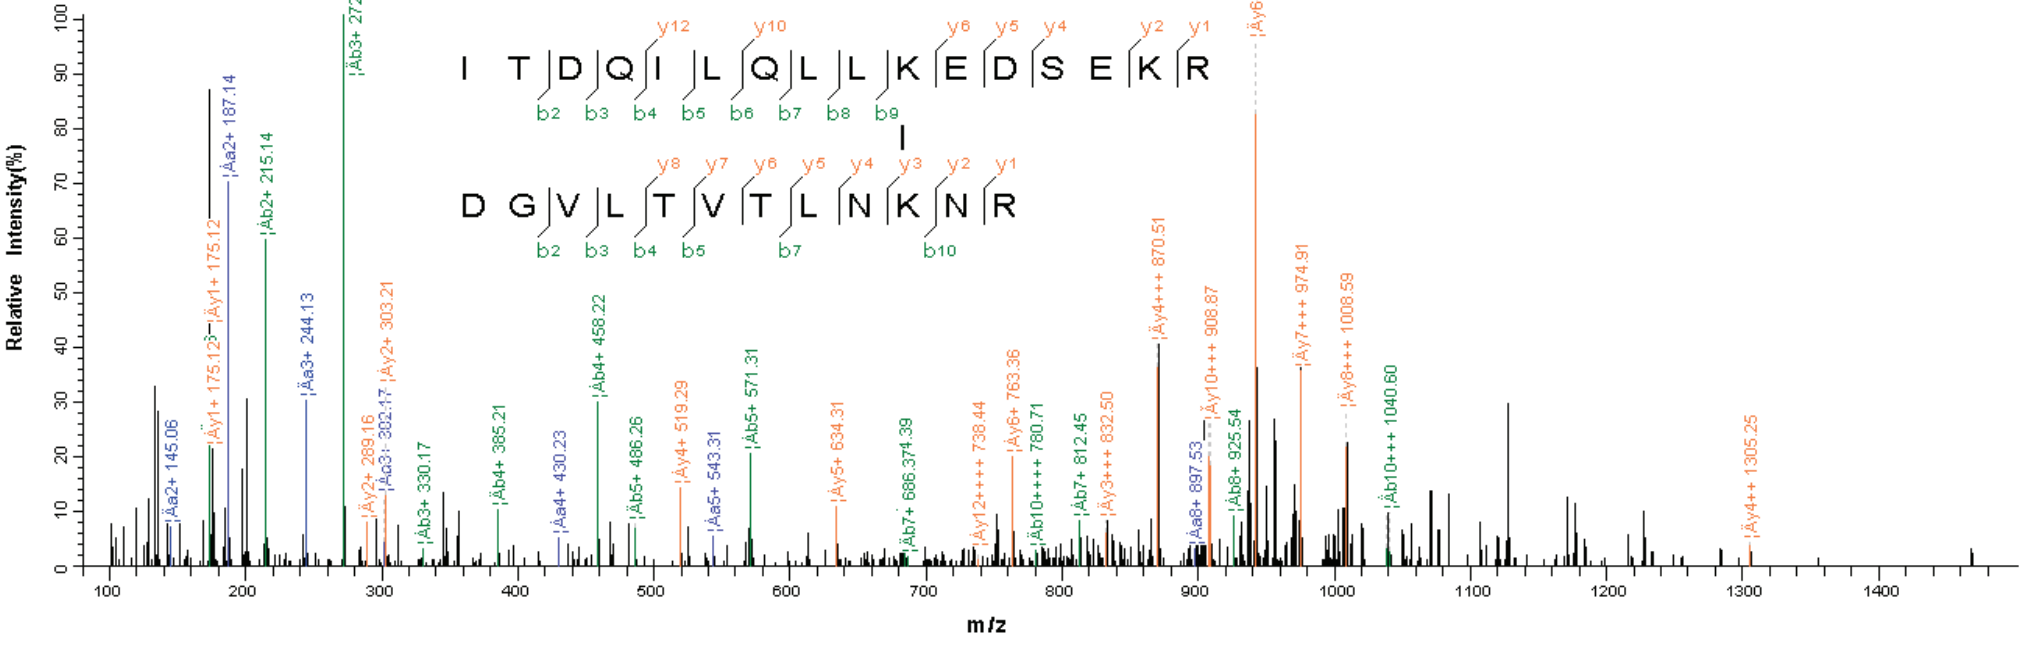

Exosome\_GFP\_test\_A78.003074.003074.5.dta Seq: ITDQILQLLKEDSEKRNKYAAMLTSENAK Mod: 25,\_Oxidation\_M\_15.995

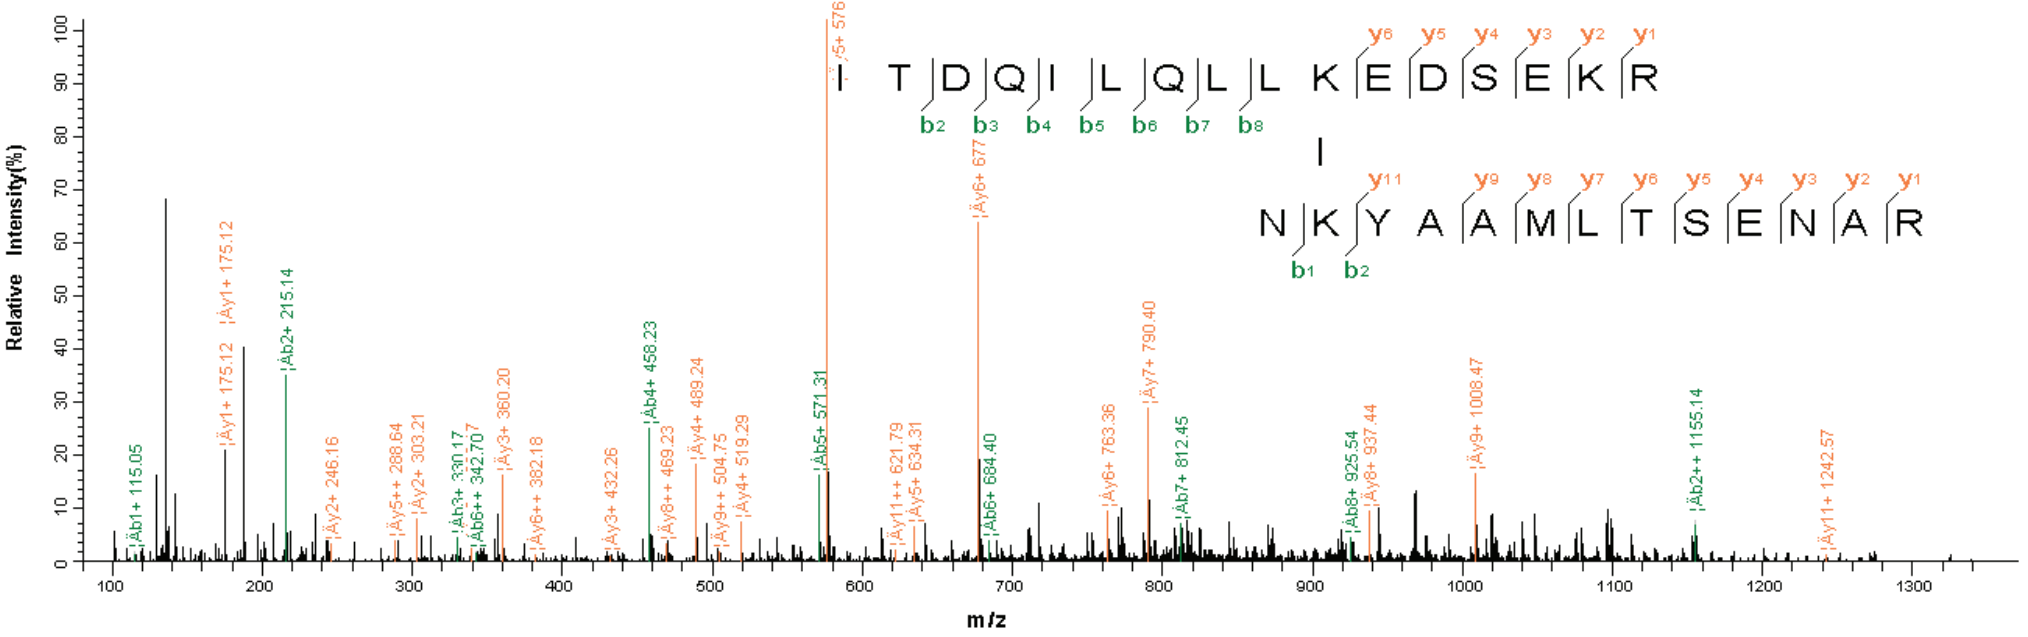

exosome\_A9\_140503145423.2037.2037.4.dta Seq: PAKGVATTR-EKVLEDK

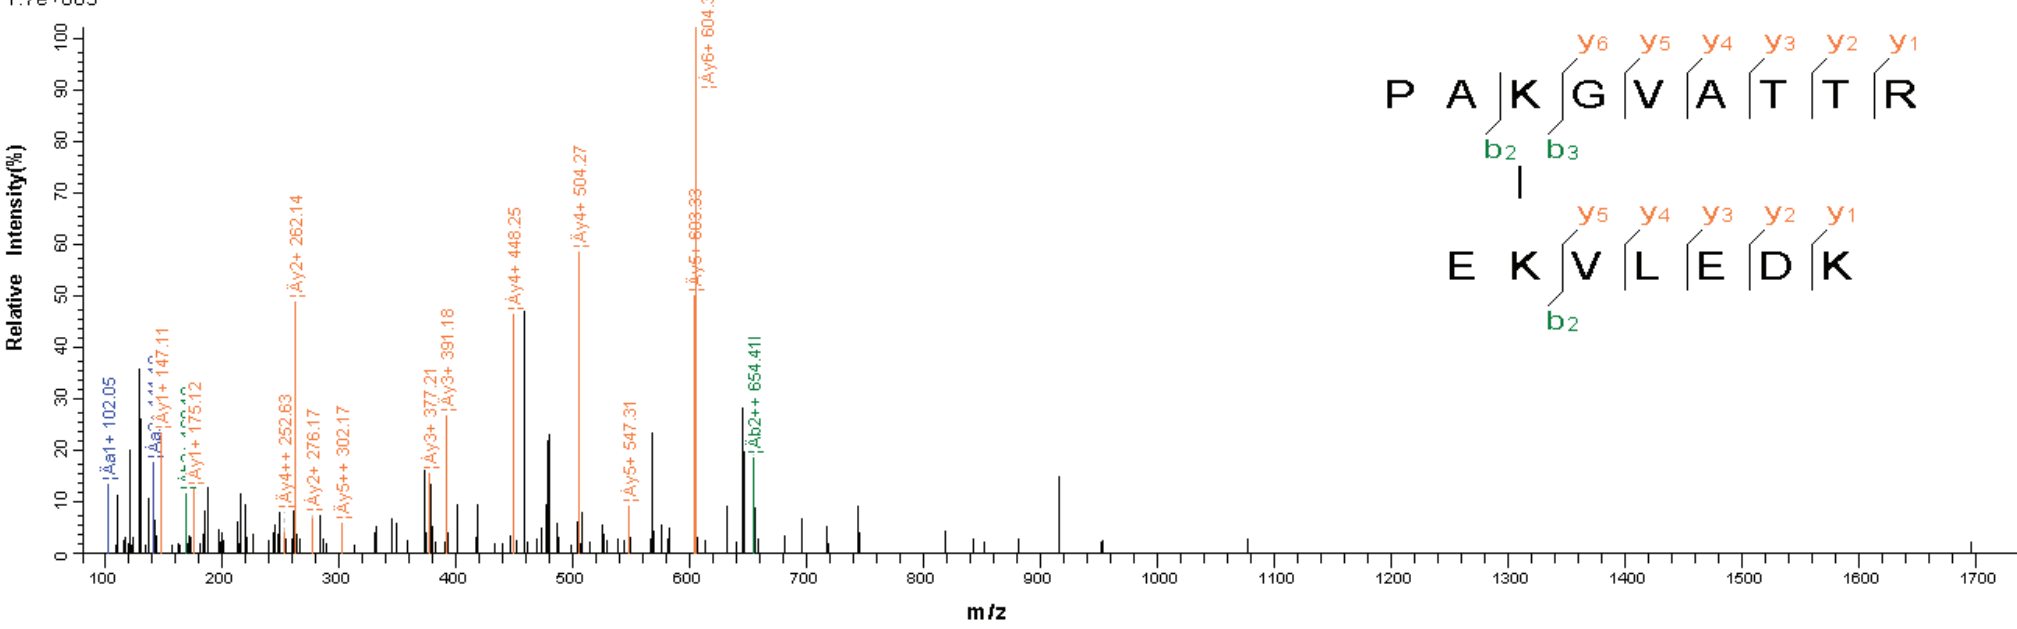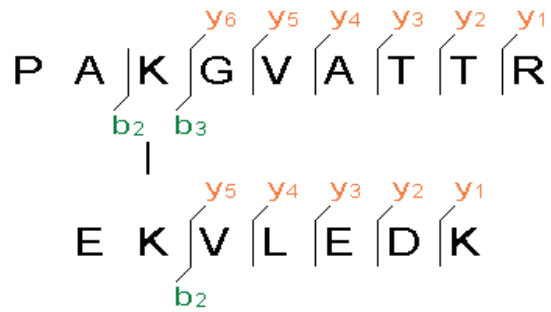

5.2e+002 exosome\_A8\_140503145423.2332.2332.5.dta Seq: EKVLEDKLR-PAKGVATTR

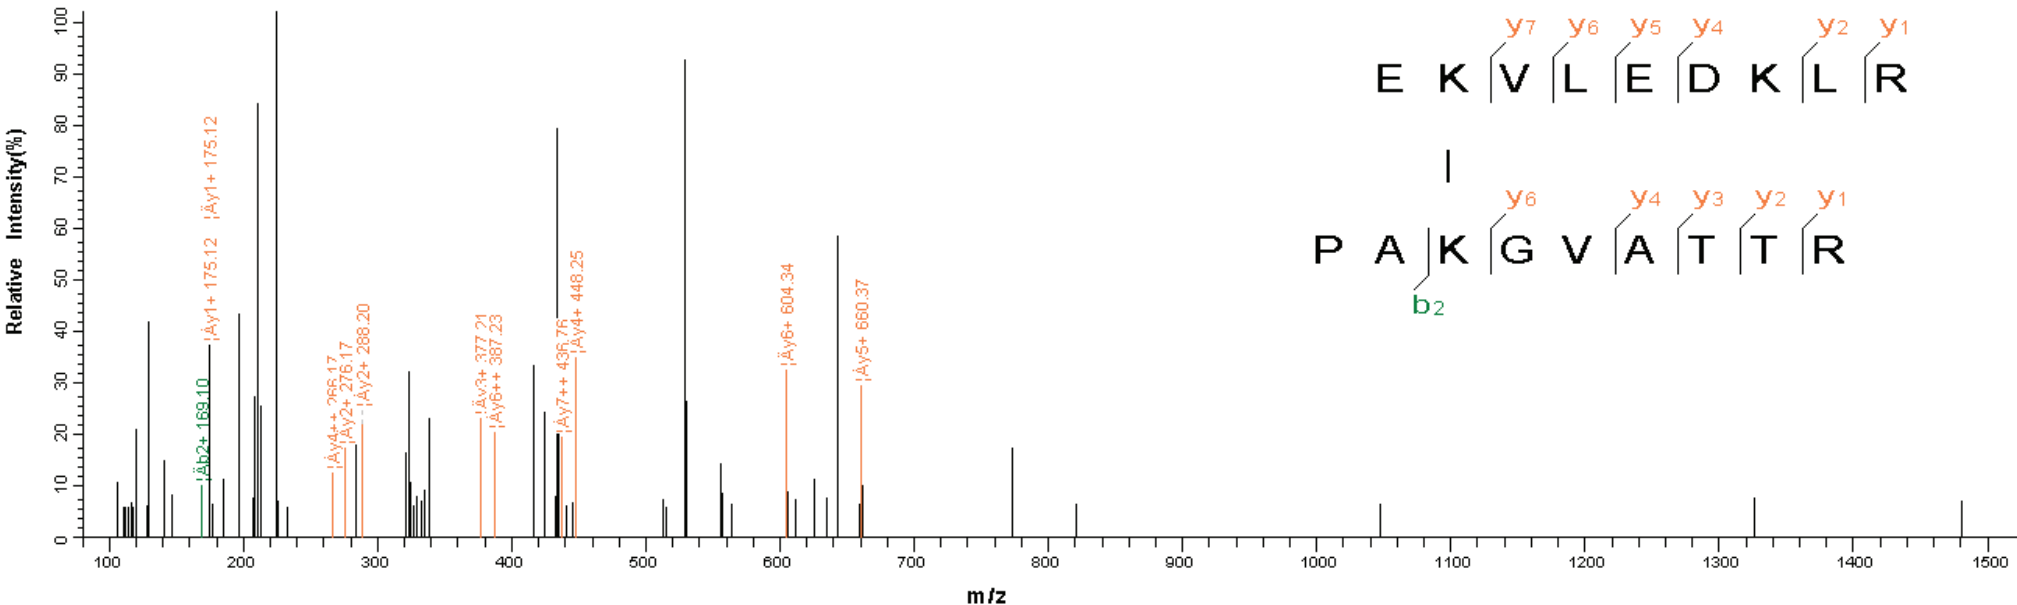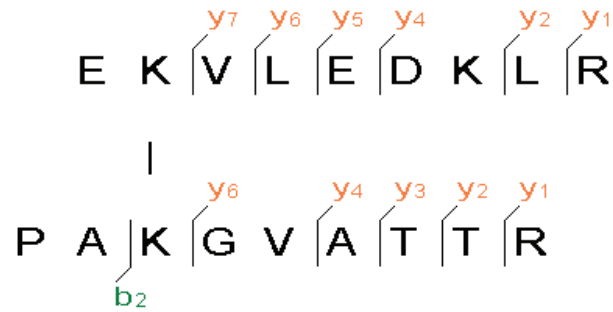

Seq: GSDLQYLGEFSGKNFSPK-KYQLADWR

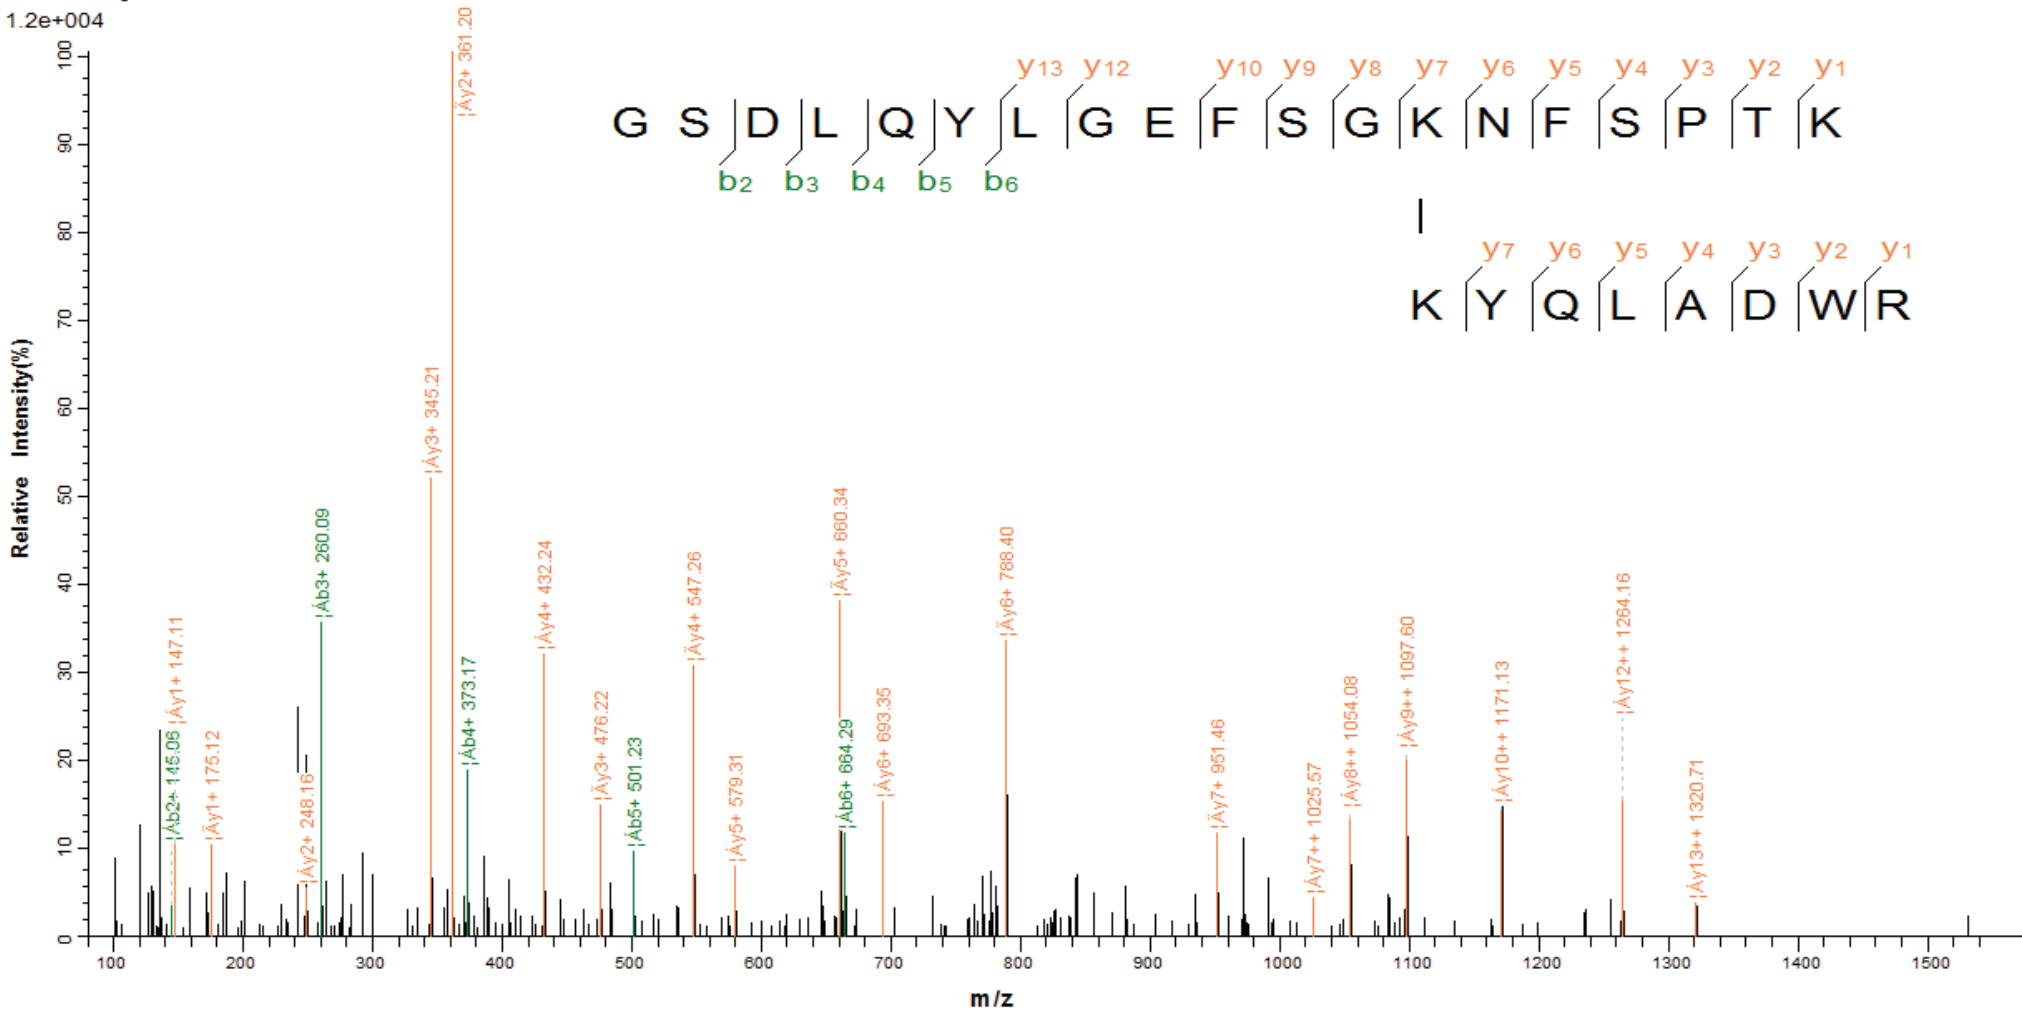

Seq: NFSPTKR-VEKPOLK

5.6e+003

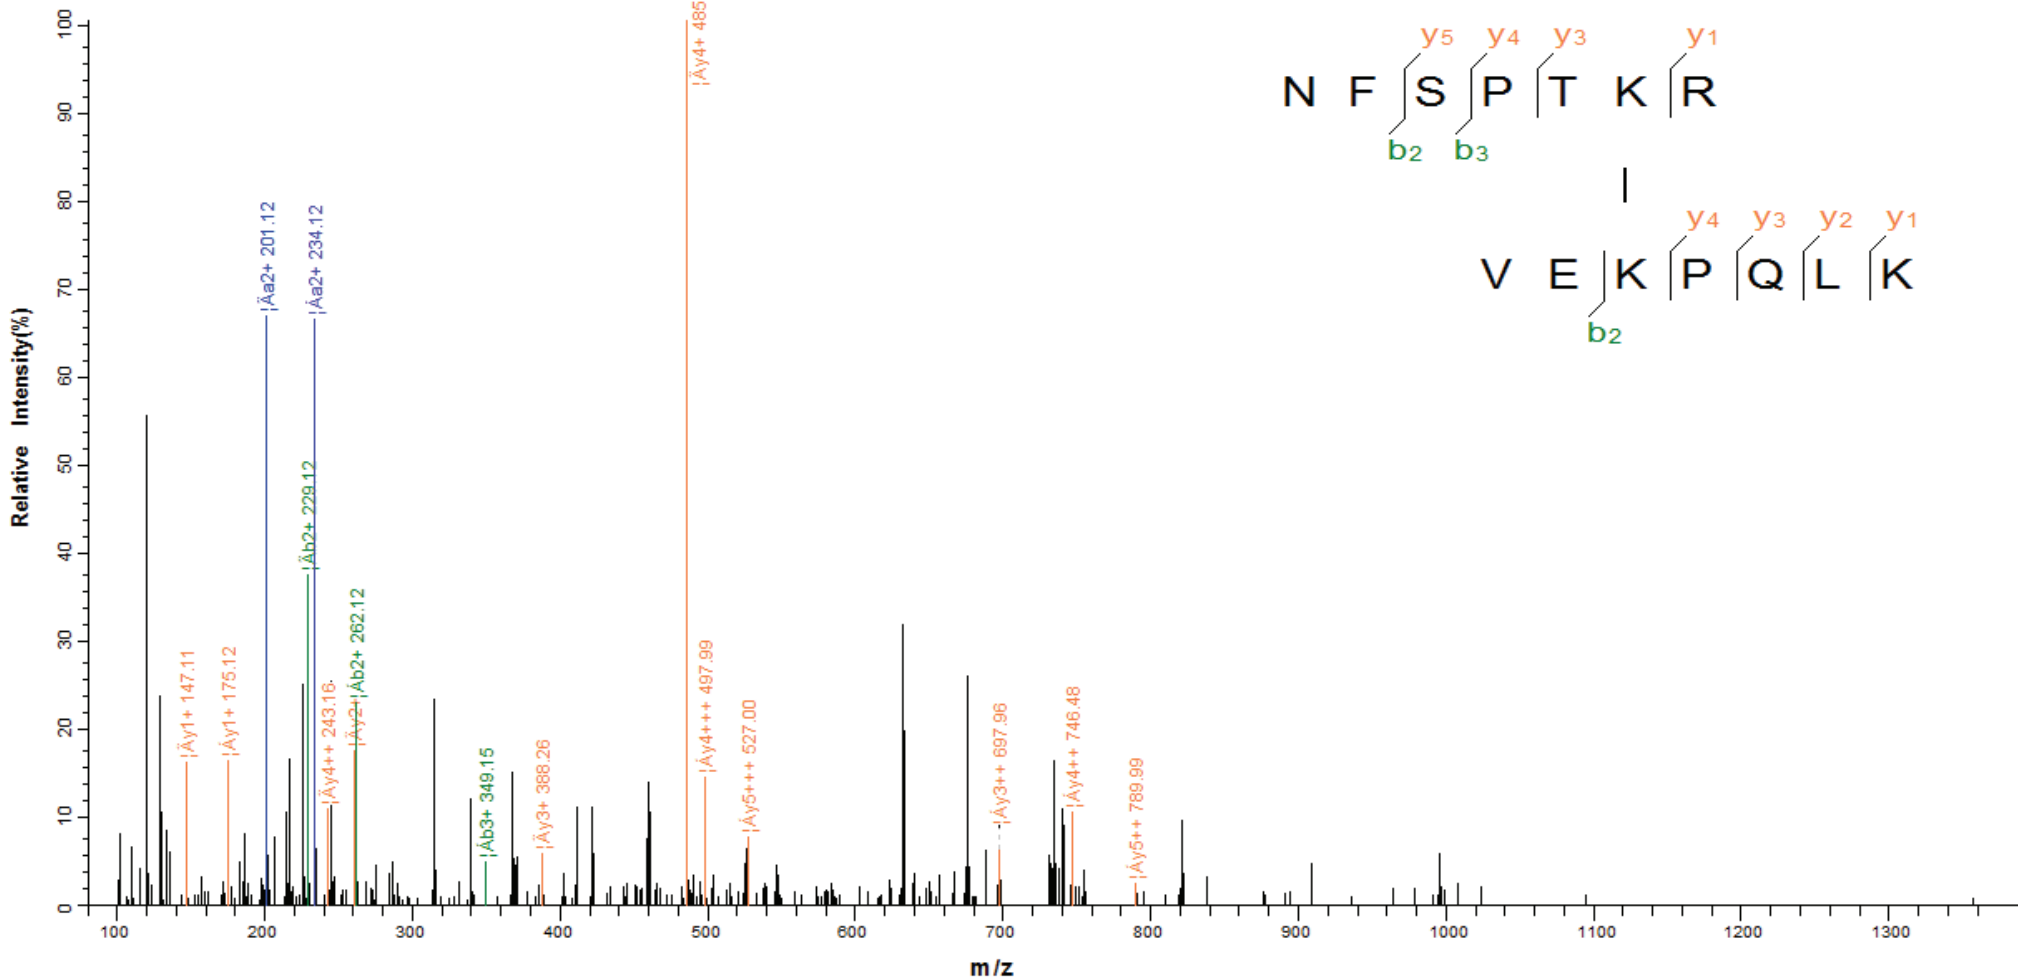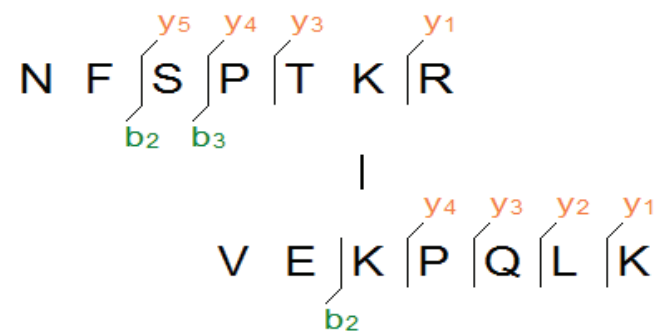

Seq: VEKPKLQK-NFSPTKR

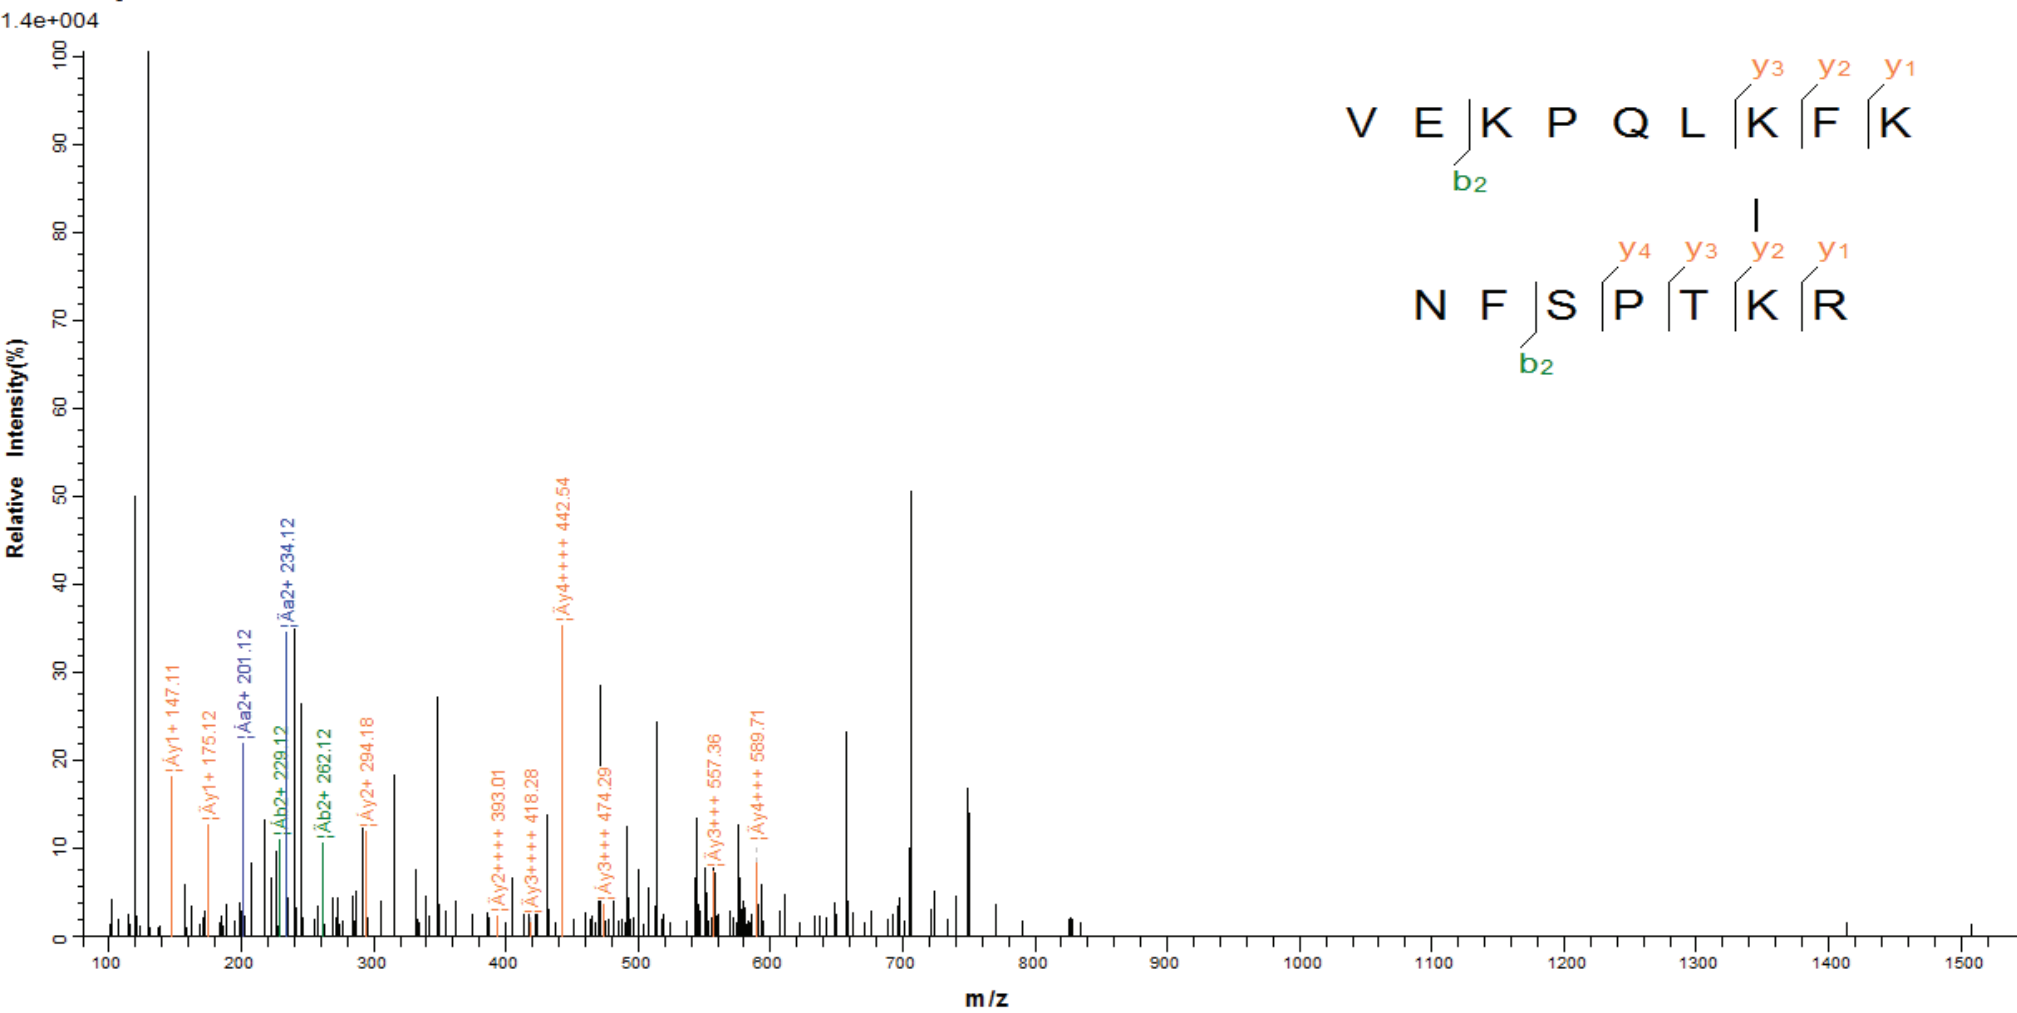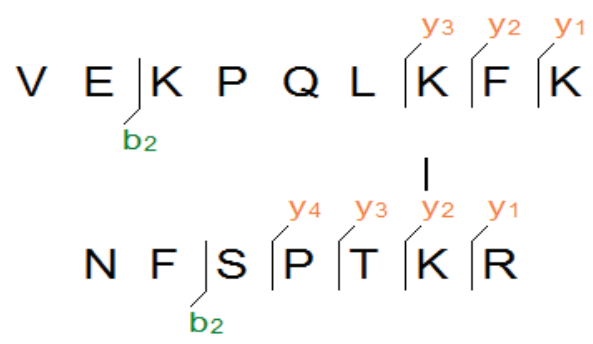



Seq: FKSPIDNSESHPFIPLLK-VEKPQLK

1.3e+003

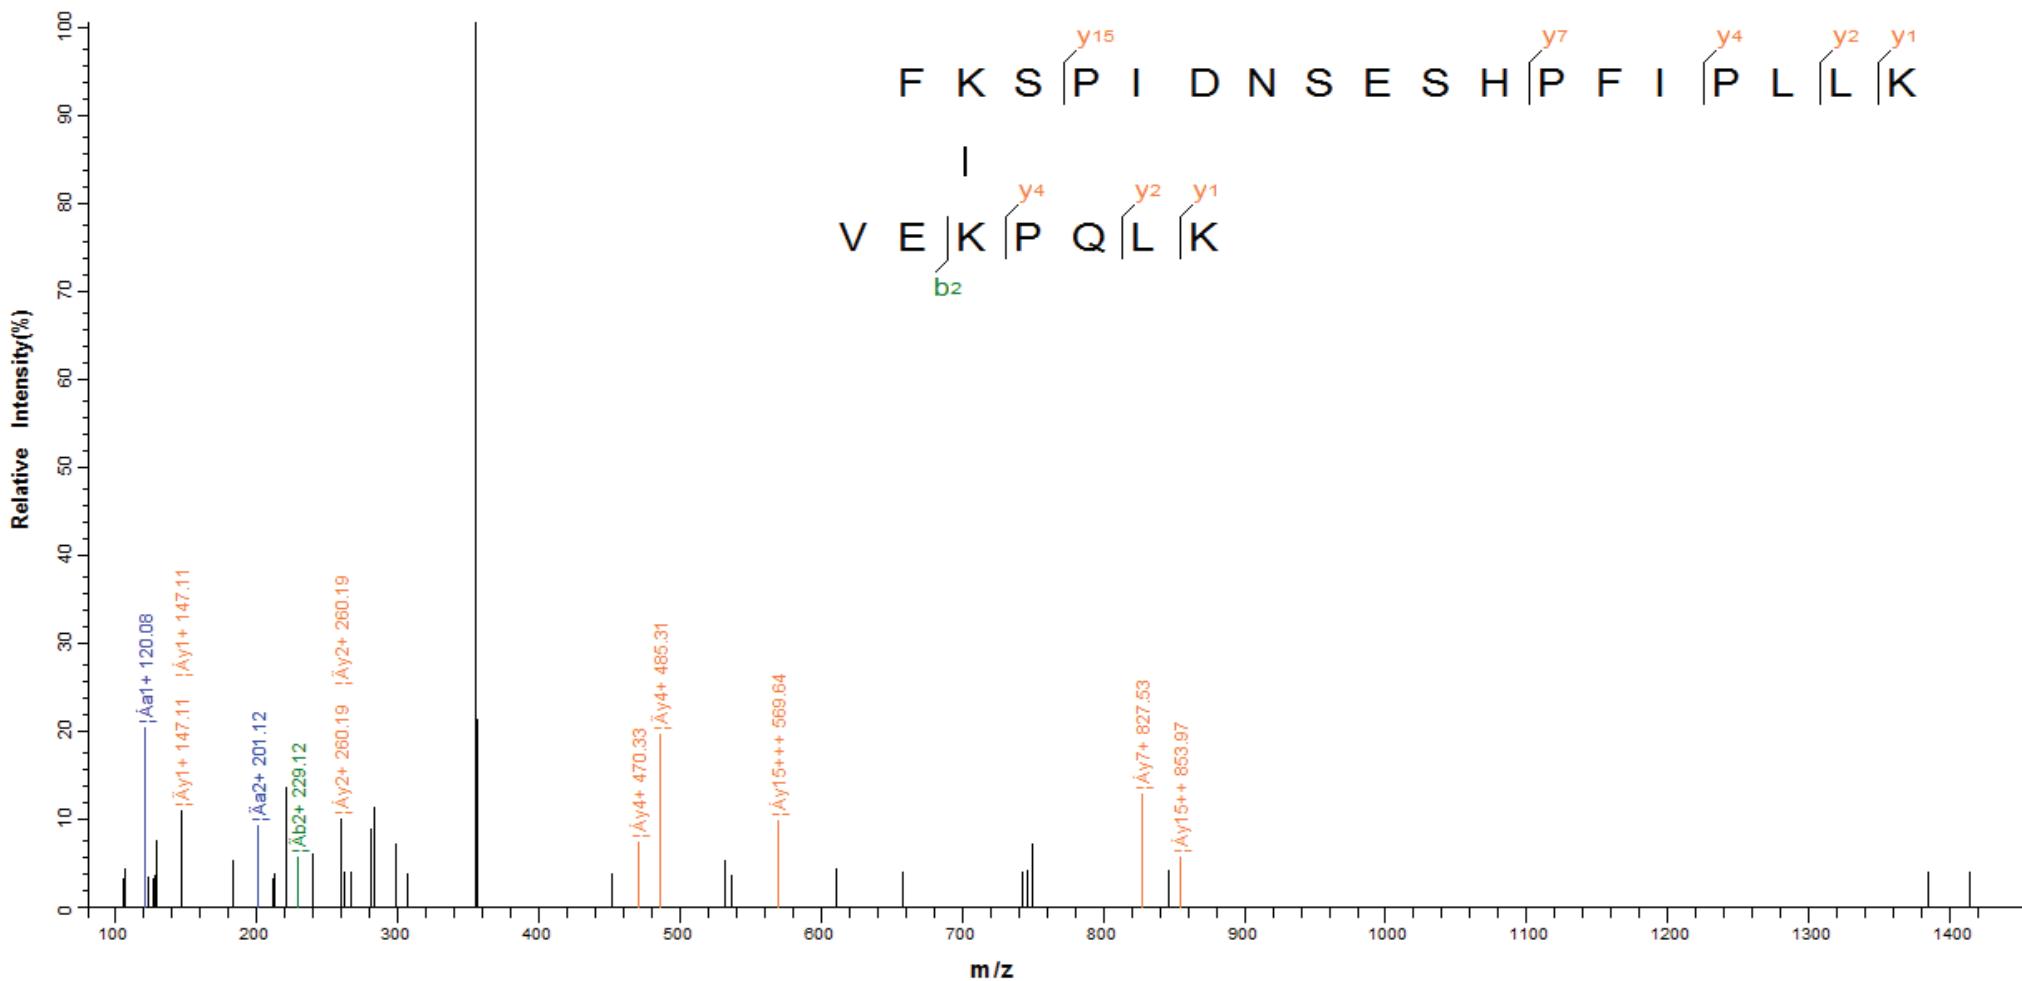

Exosome\_GFP\_test\_A78.003426.003426.6.dta Seq: FKSPIDNSESHPFIPLK-ERDYLVDTLKLR

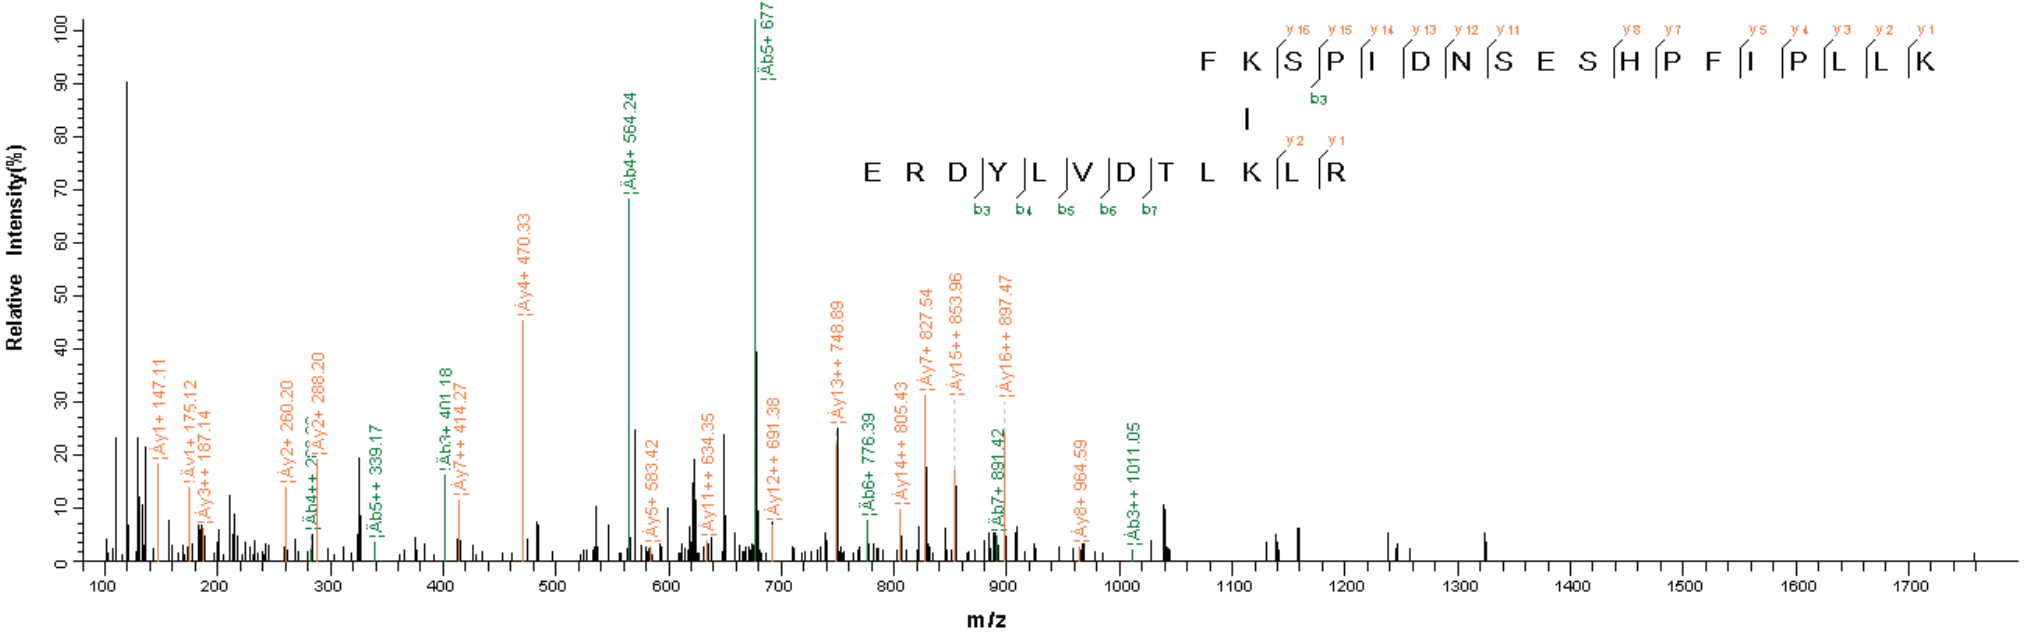

F K S P I D N S E S H P F I P L L K  
 I  
 E R D Y L V D T L K L R  
 b3 b4 b5 b6 b7 y16 y15 y14 y13 y12 y11 y8 y7 y5 y4 y3 y2 y1

Seq: SPIDNSESHPFIPLLKEK-EKPNALKPLSESLR

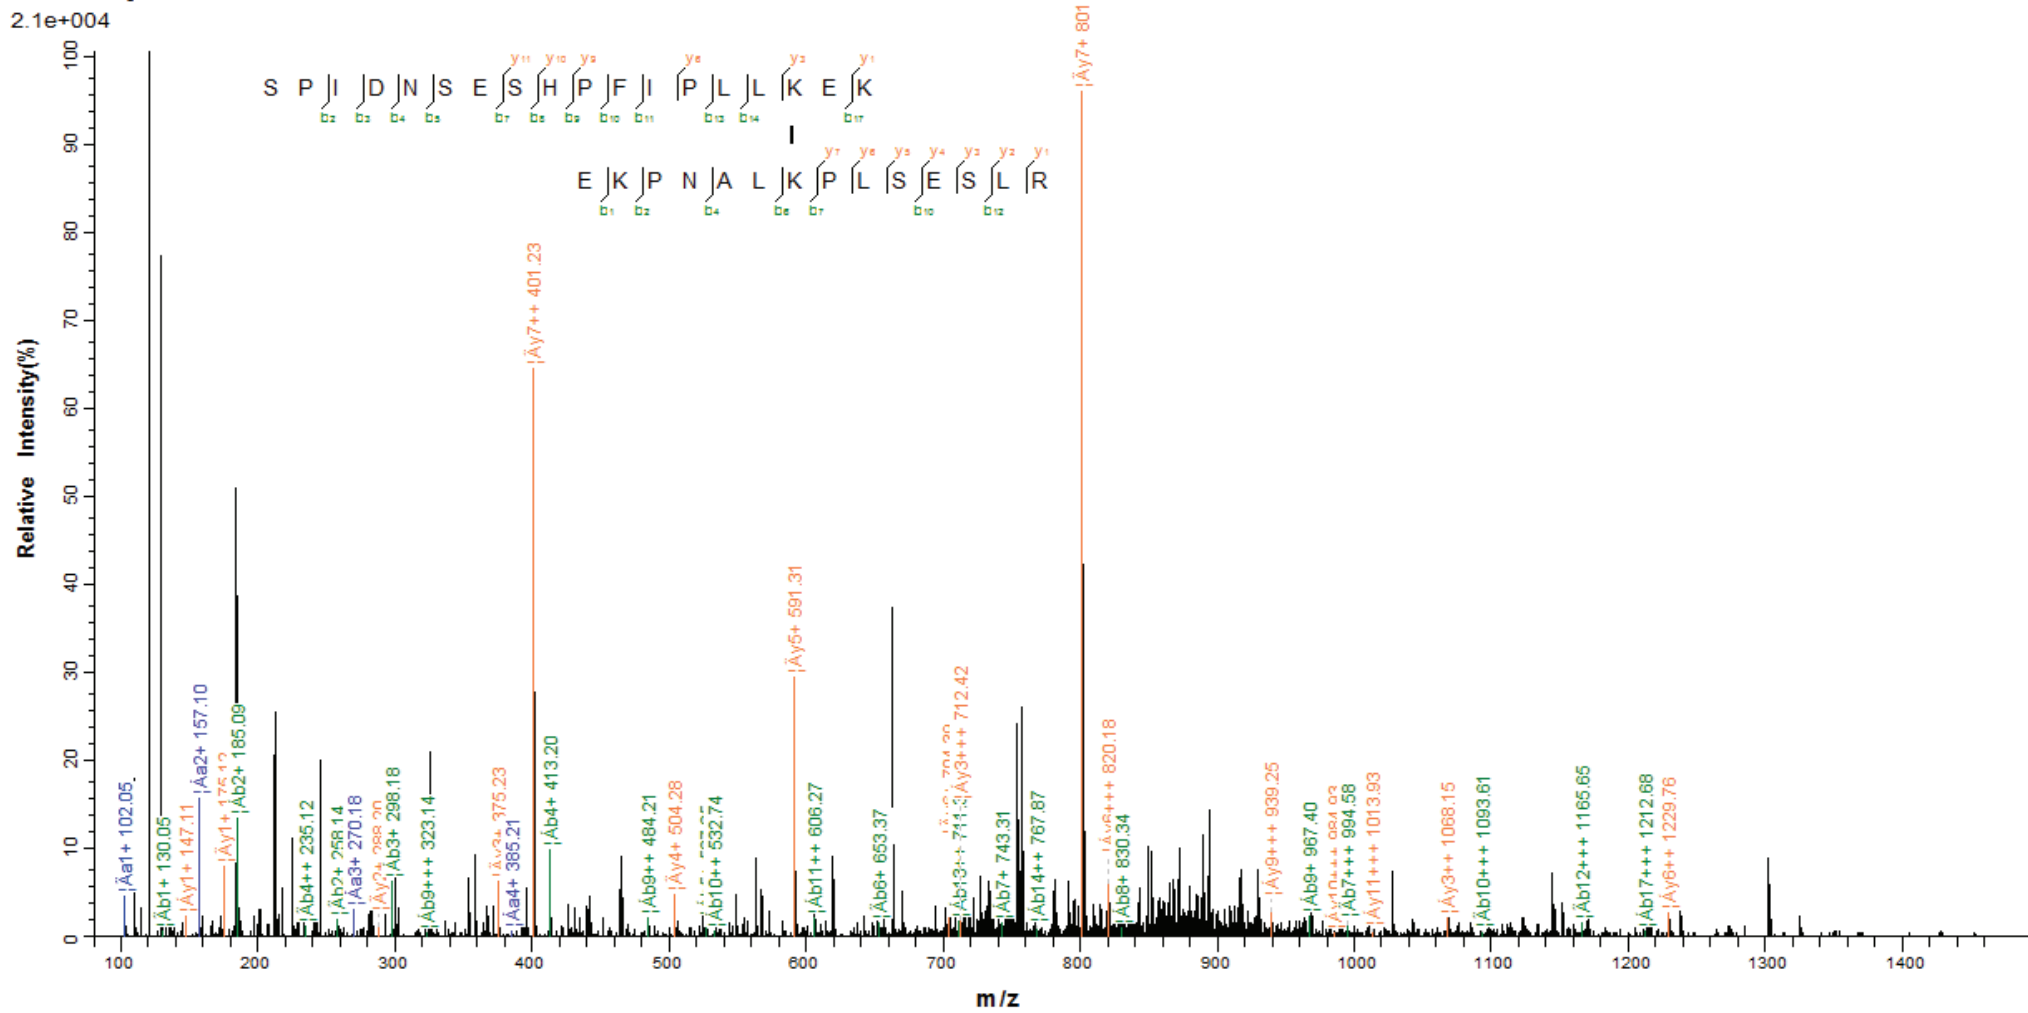

Exosome\_GFP\_test\_A78.003200.003200.5.dta Seq: SPIDNSESHPFIPLLKKEK-PNALKPLSESLR

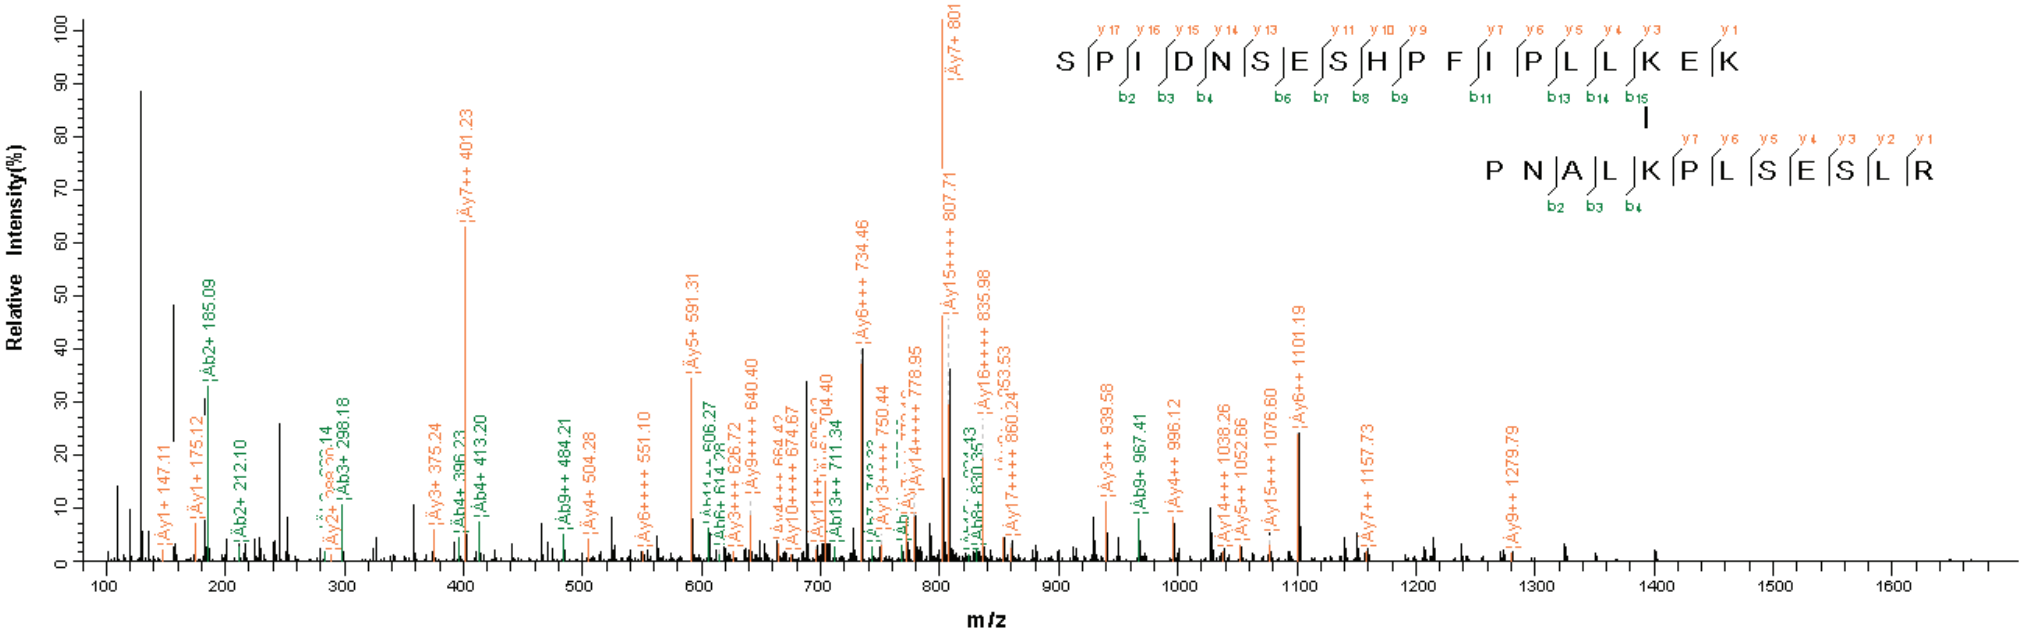

Exosome\_GFP\_test\_A78.002838.002838.4.dta Seq: AASSLASQDVFYKLNLDLRFYKNDLR

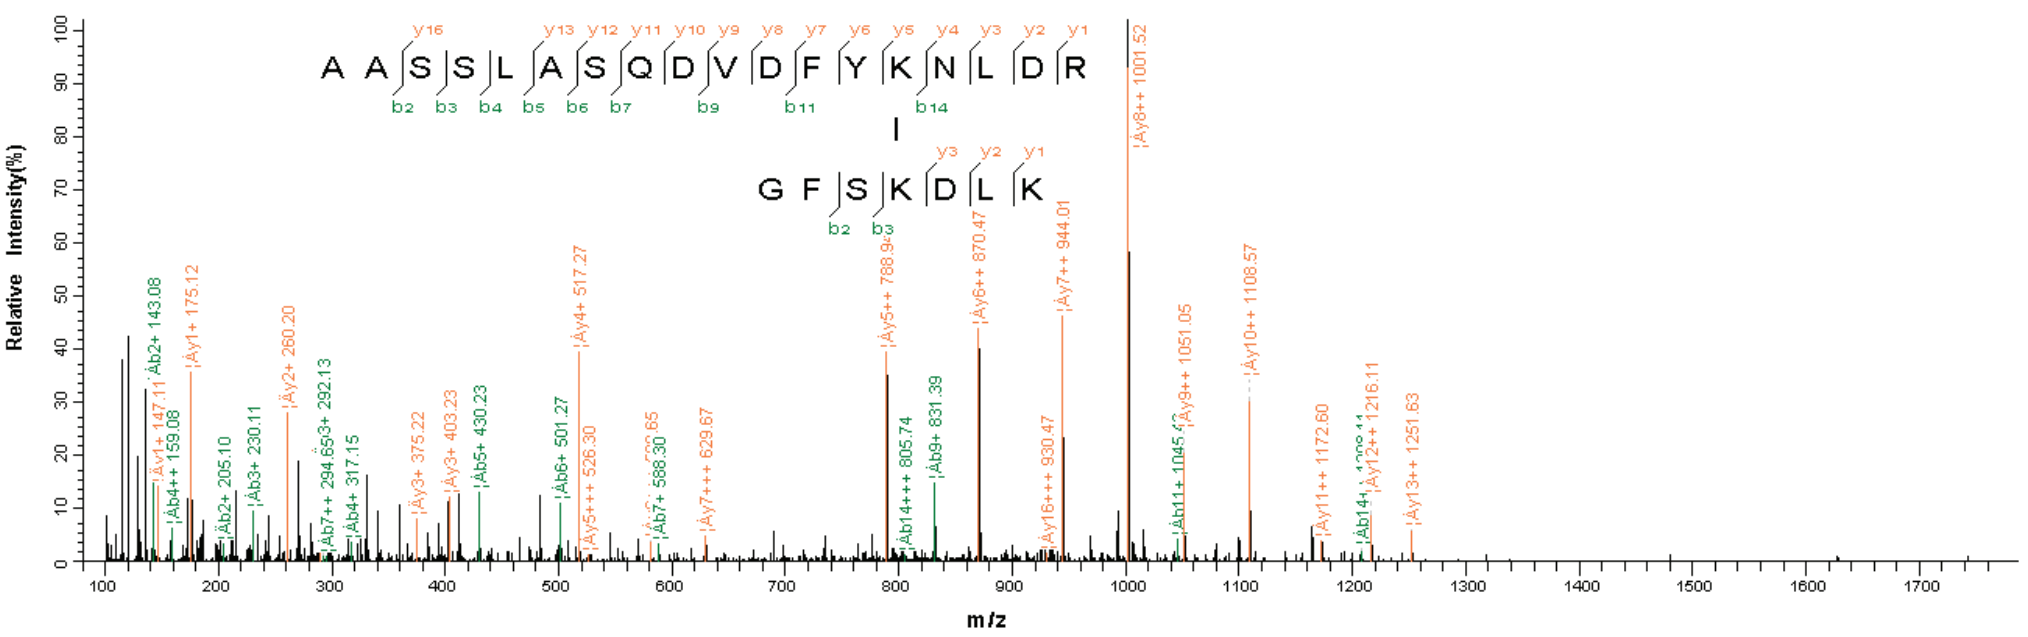

Seq: AASSLASQDVDFYKNLDR-DLKSK

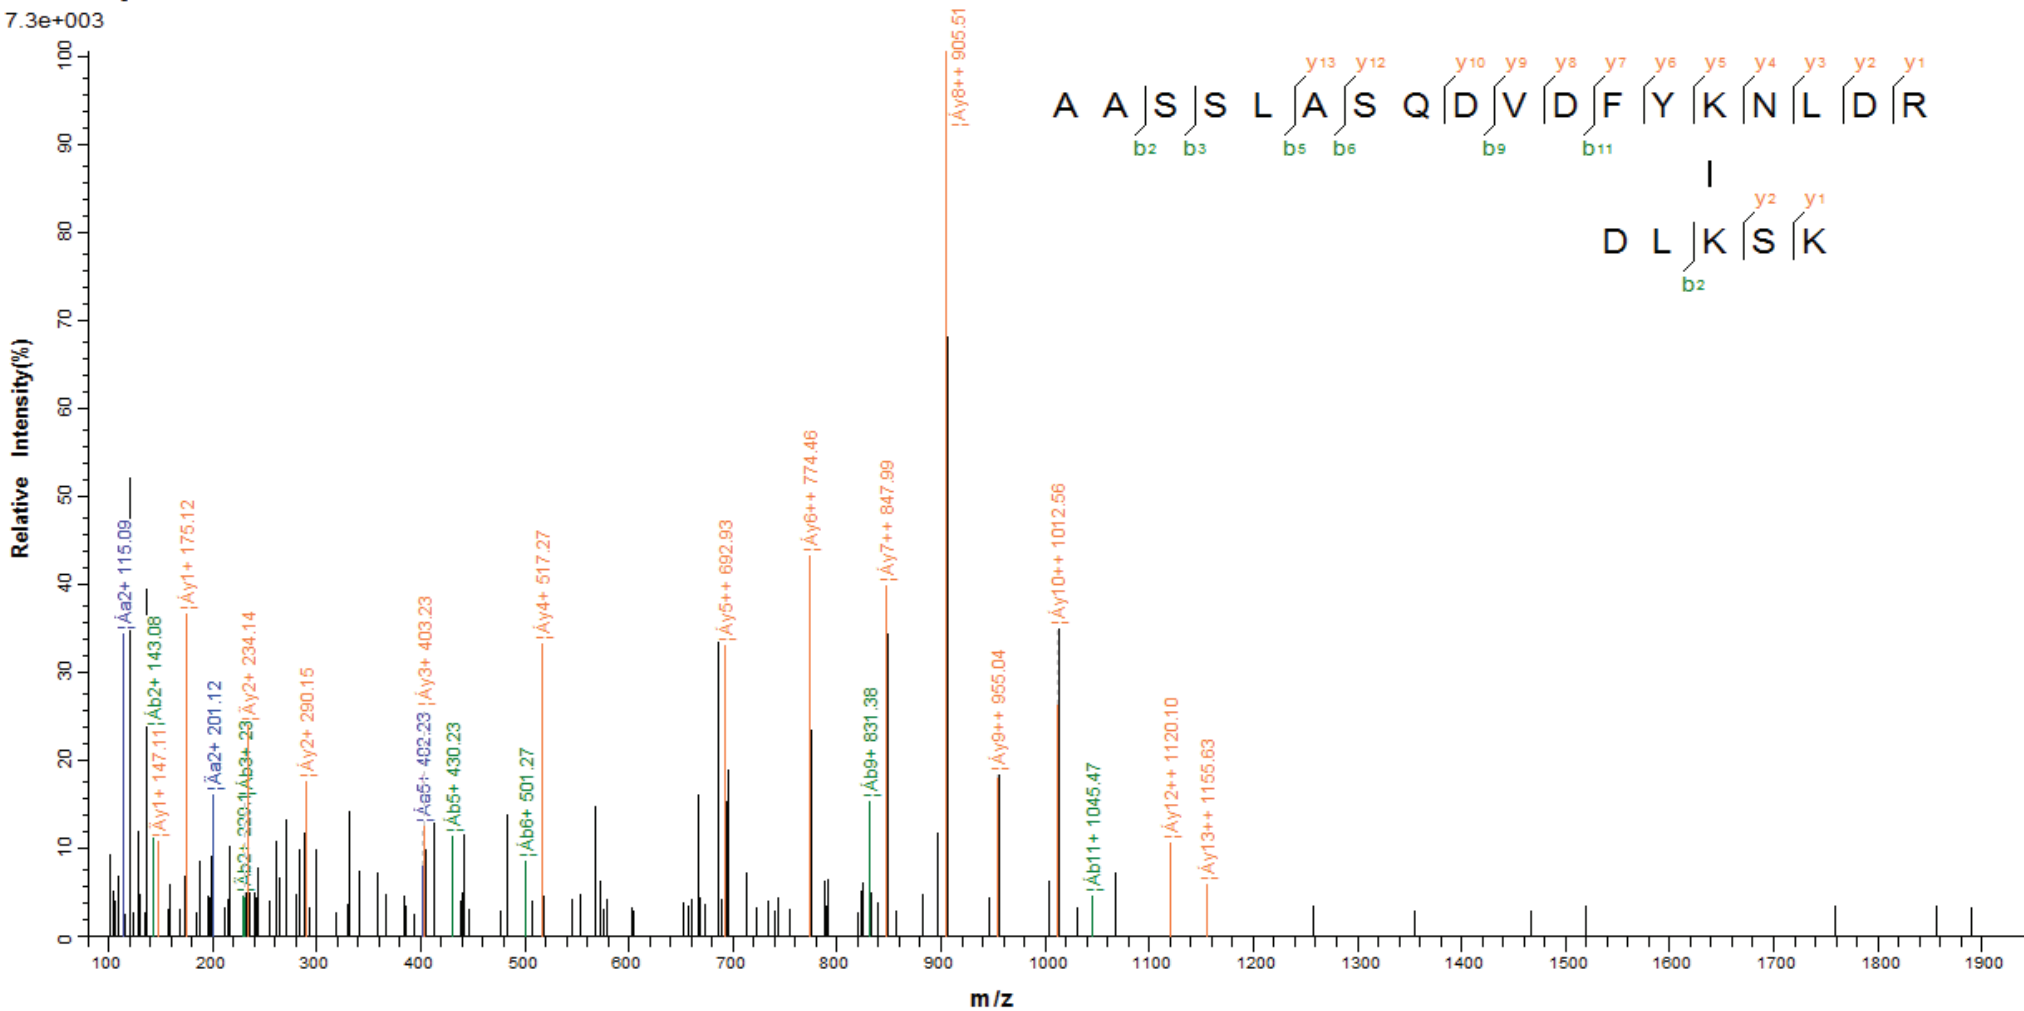

Seq: HSLAYLLENFANFKTSK-KYQLADWR

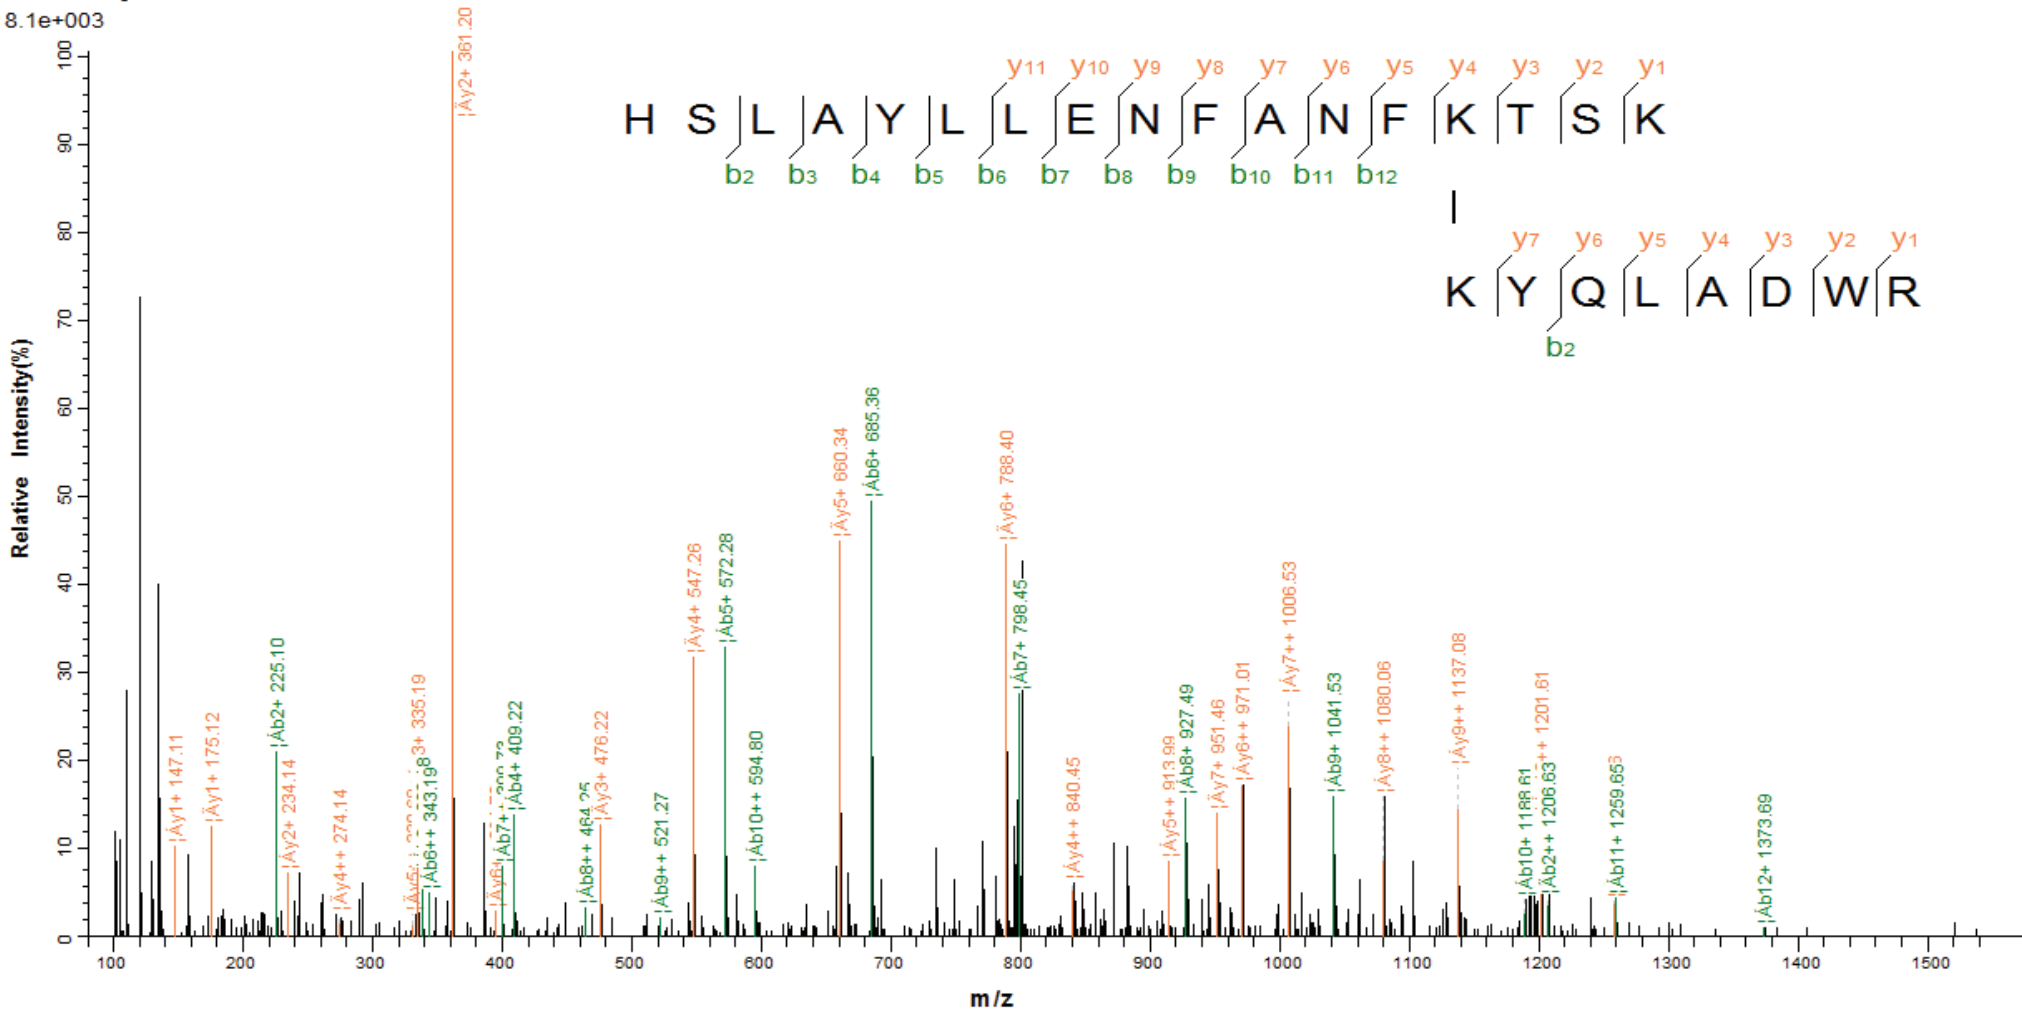

Seq: KYQLADWR-NFSPTKR

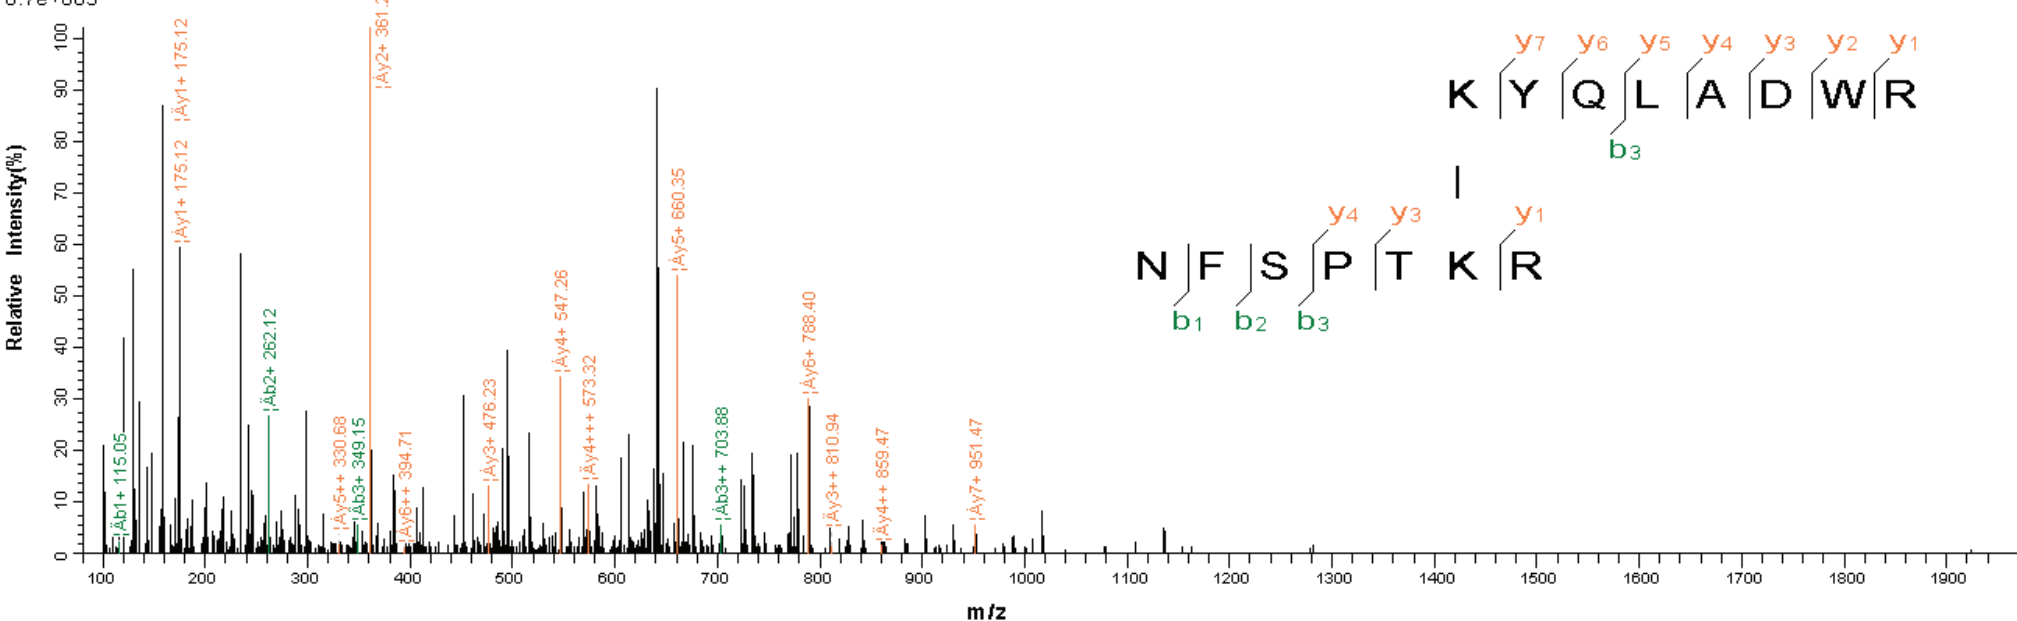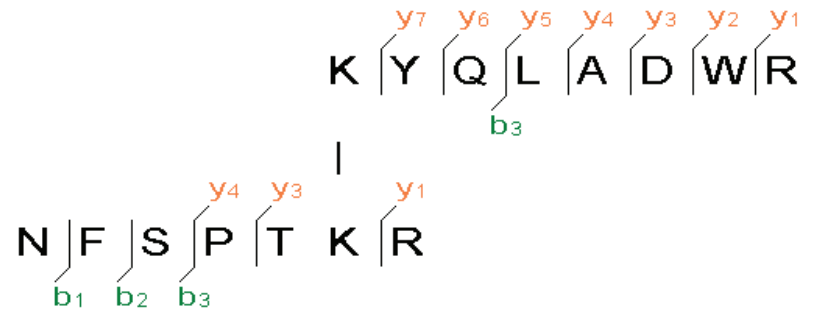



Seq: IRPLSKPMTAYAR-KYQLADWR Mod: 8,\_Oxidation\_M\_15.995

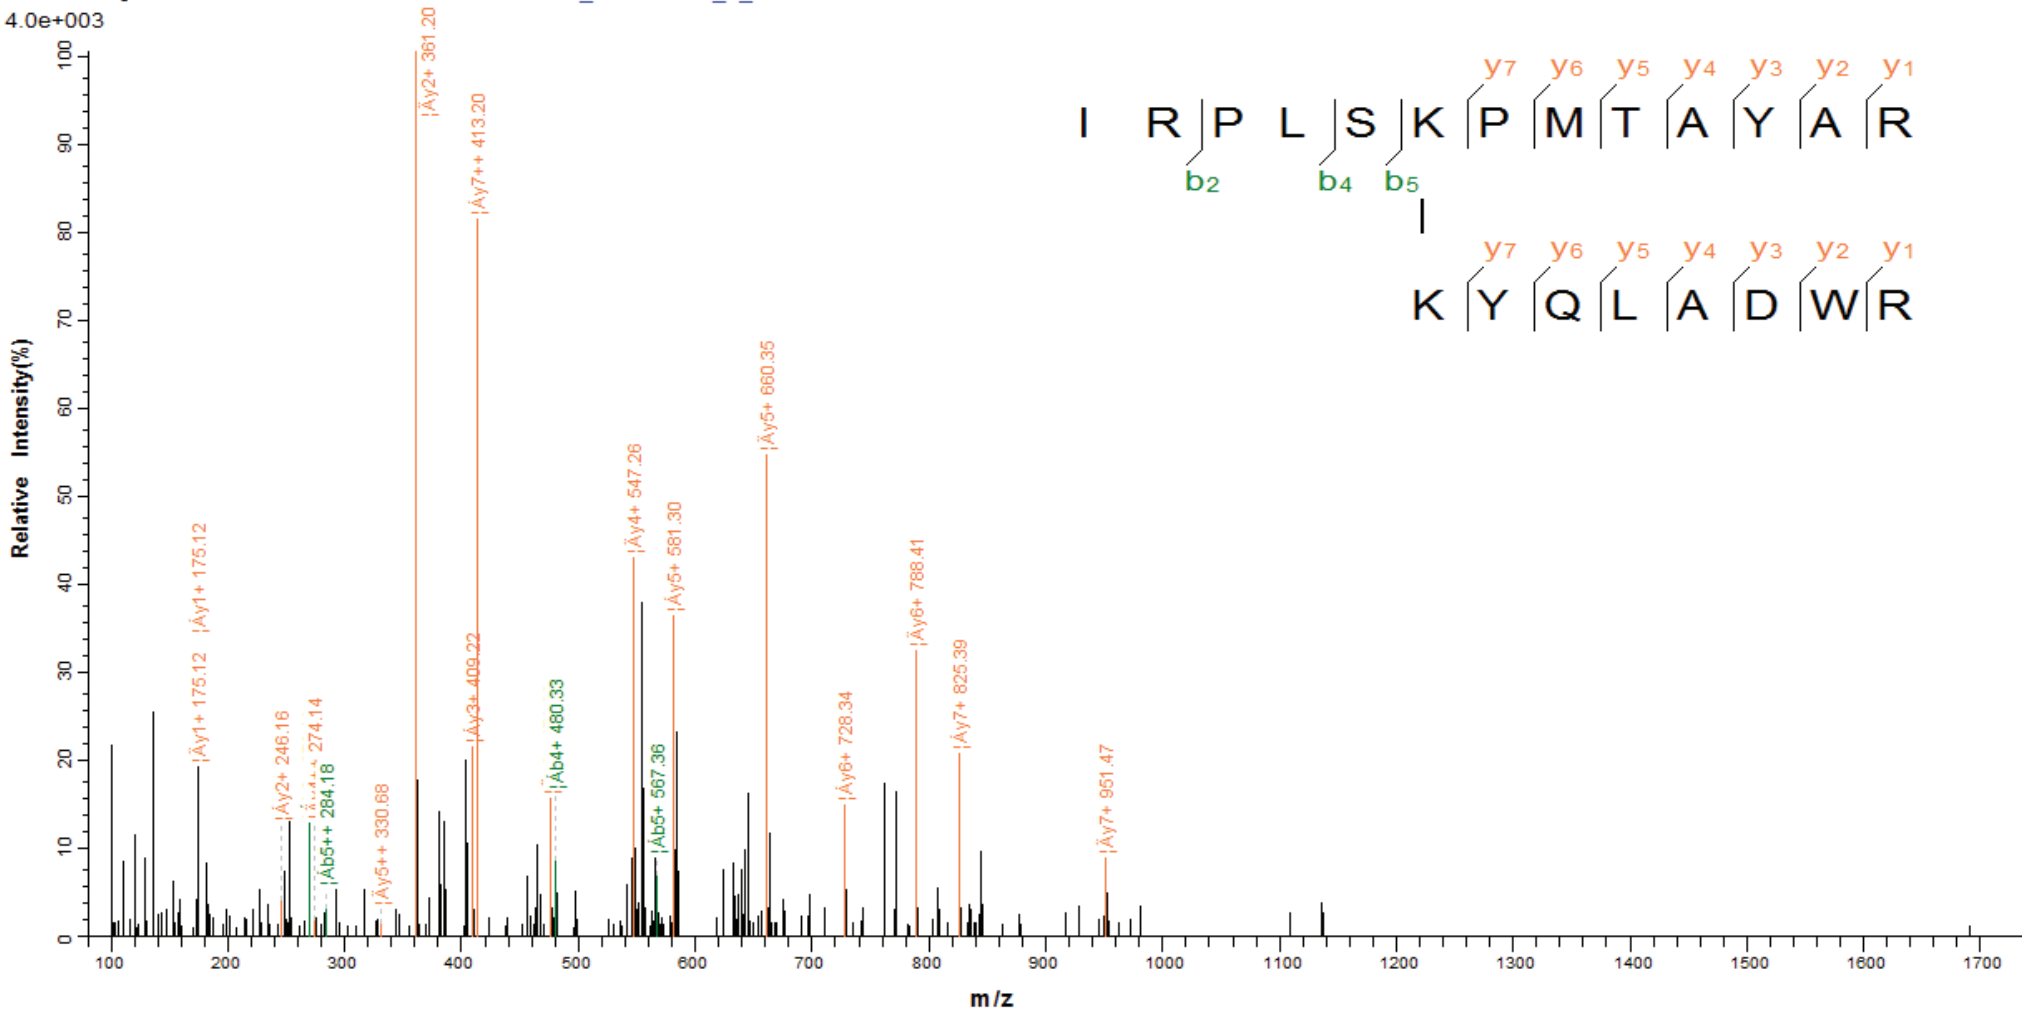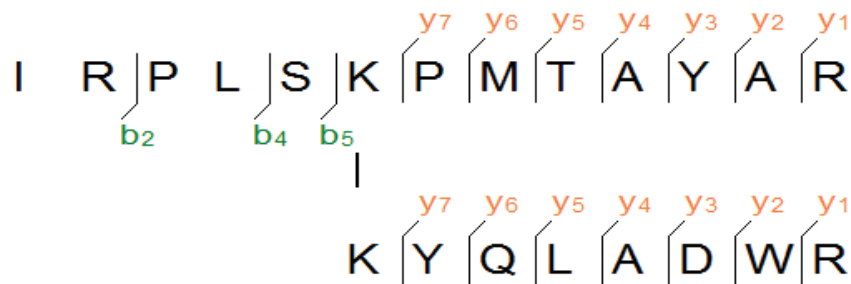

seq: GFSKDLK-SKADK

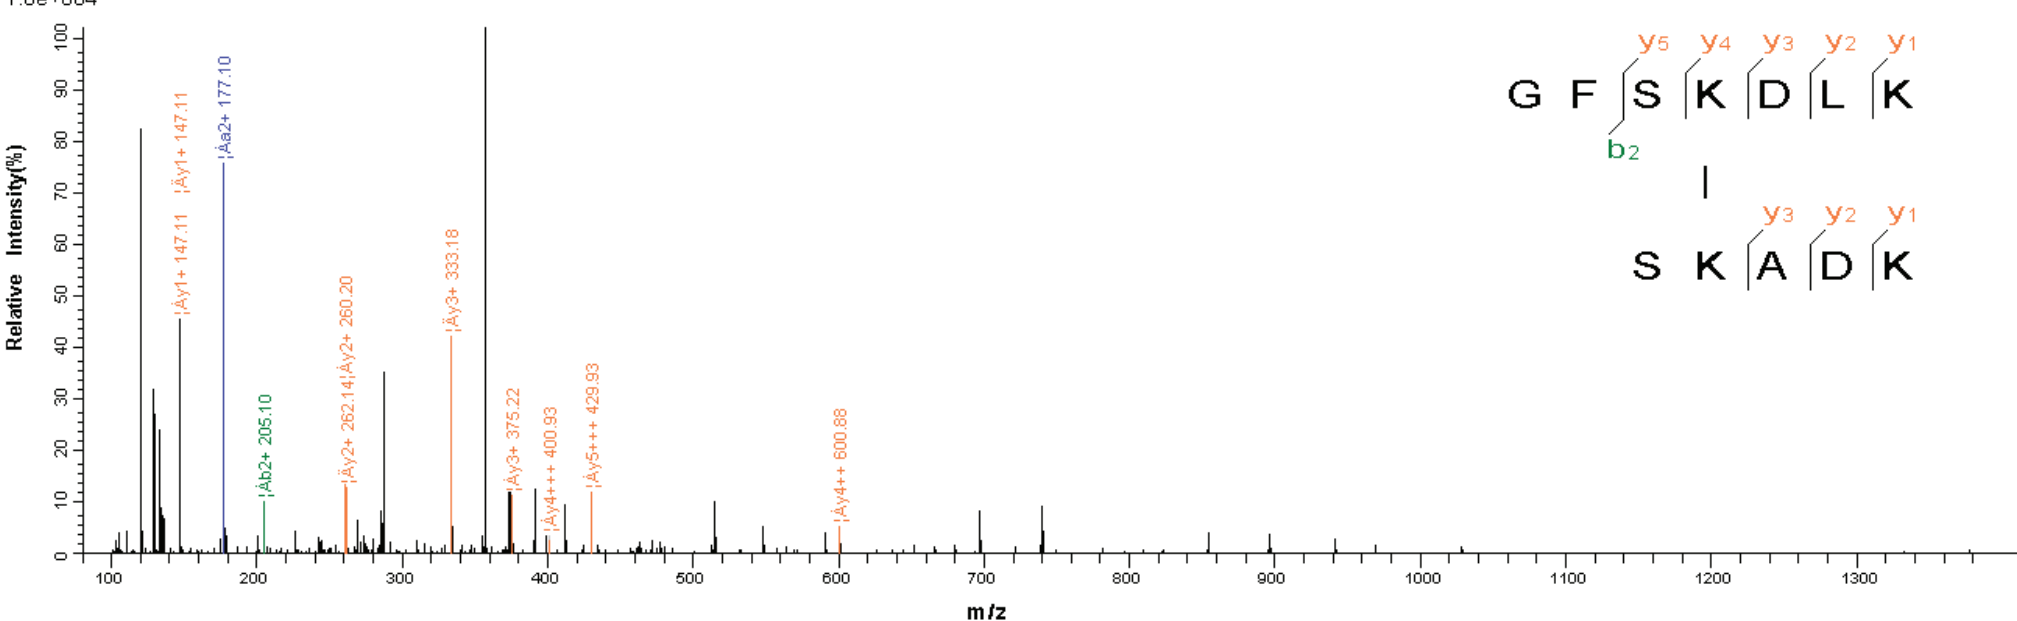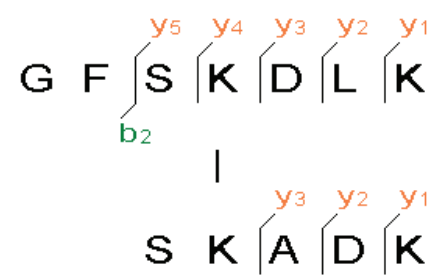

Seq: FSVLCNSNISKSR-AKPVTNSSILLGK Mod: 5,C\_57

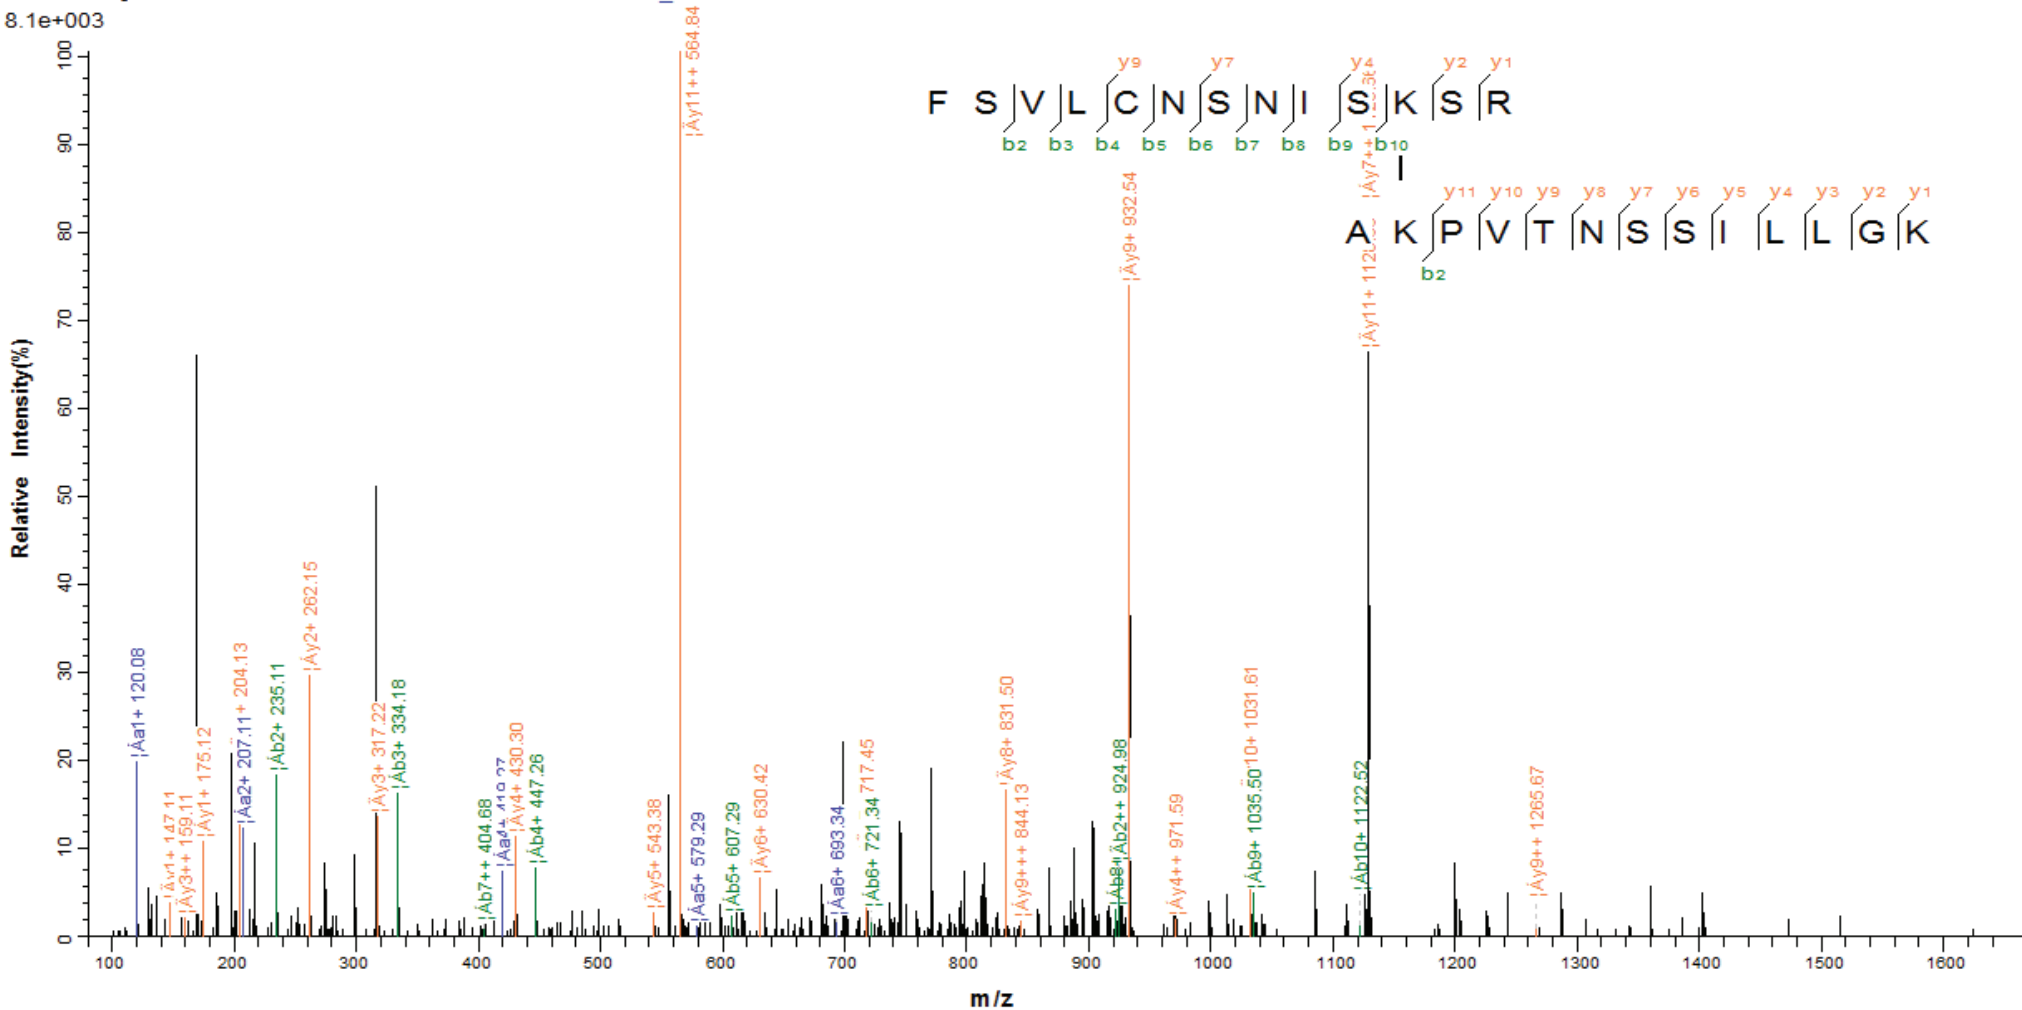

Seq: EEHDIAYSKDGLPNK-VKTEDIR

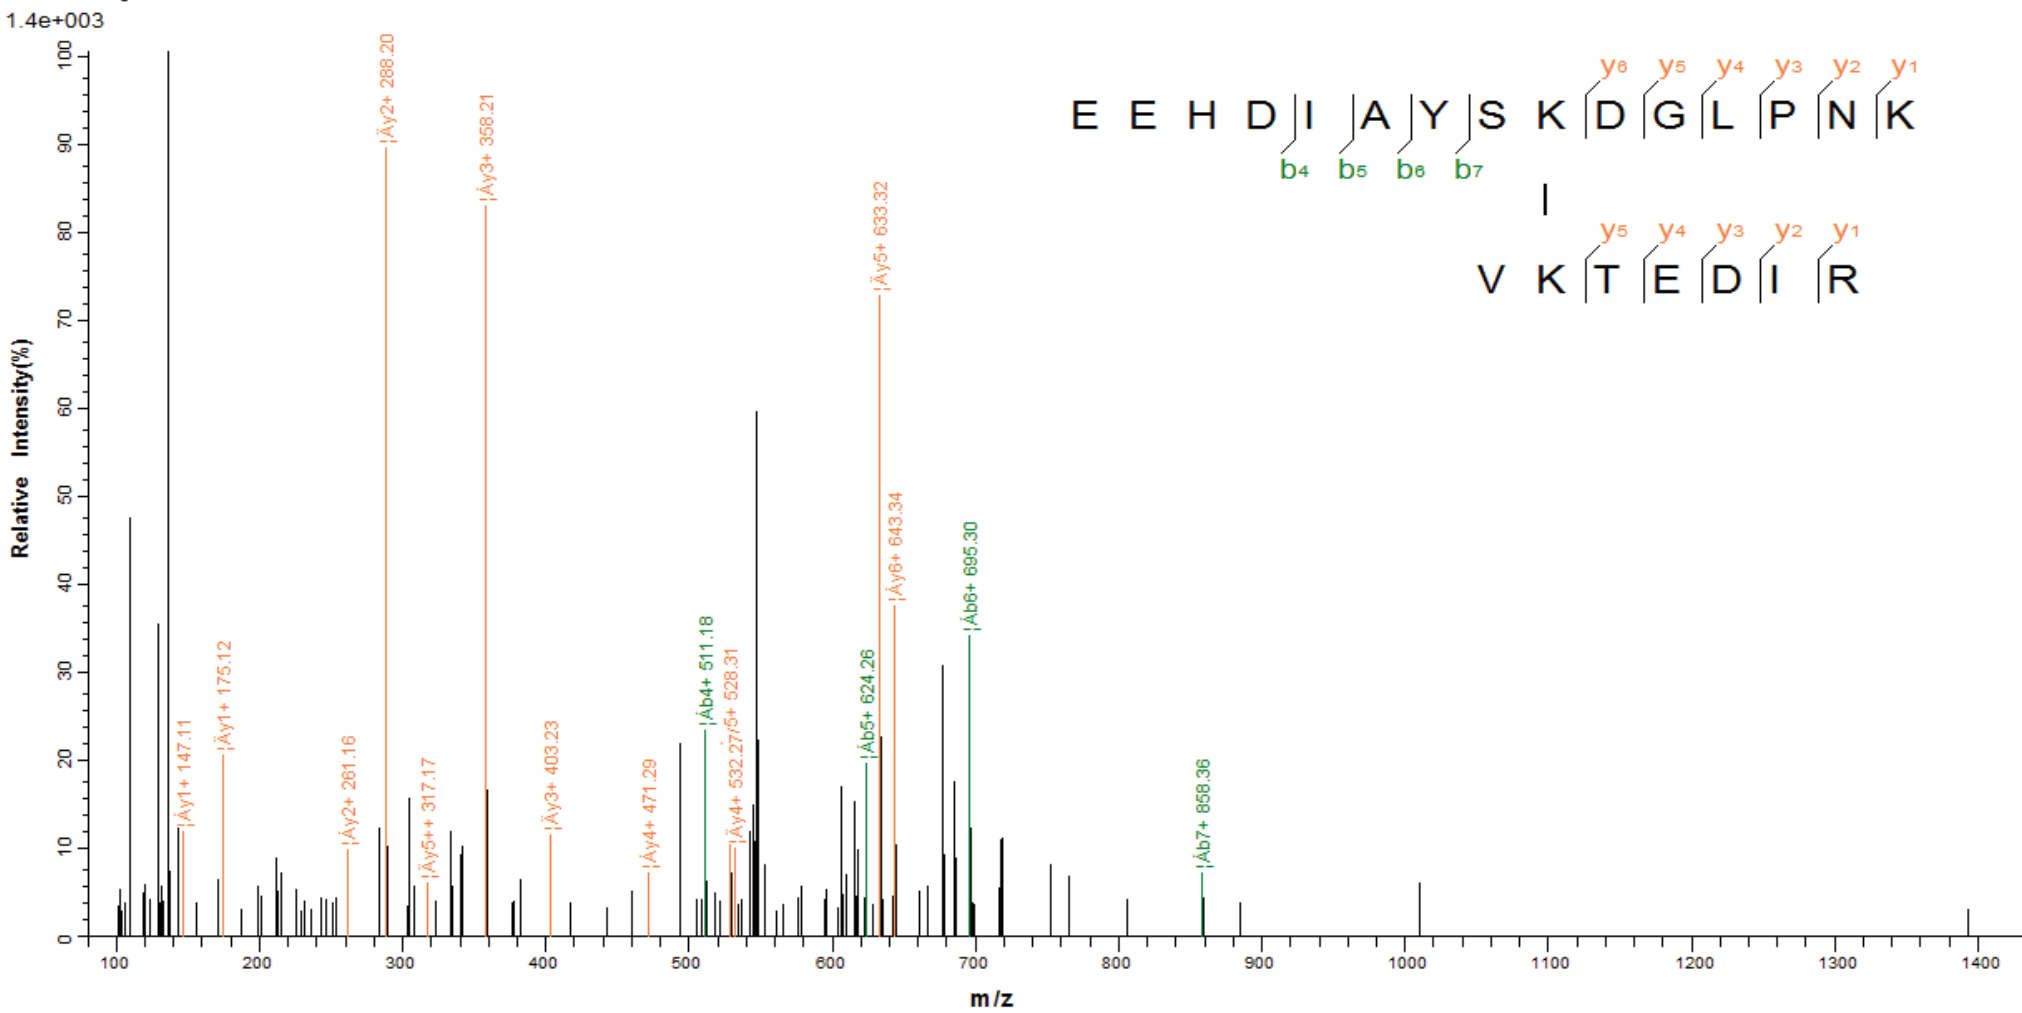

Seq: TVDPASAPNHSPEIDNLDLVVLKK-KNIQK

2.3e+004

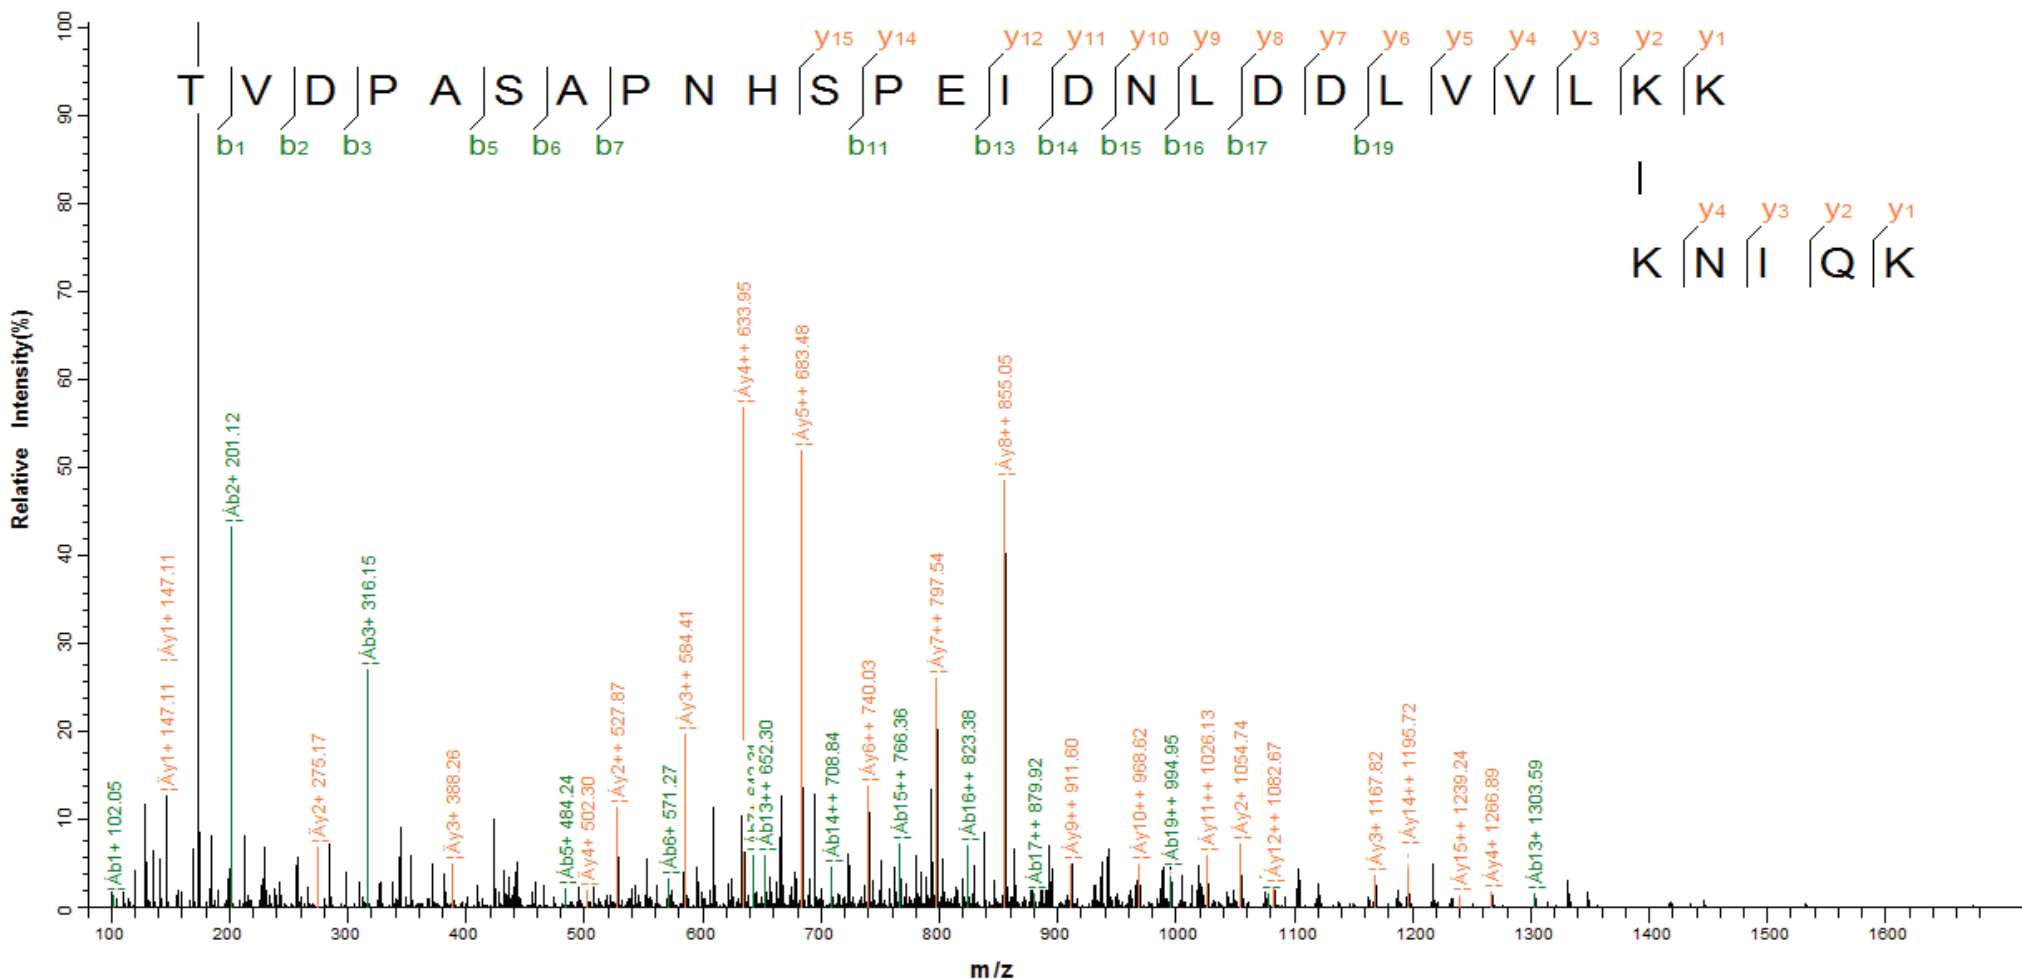

Seq: IPNILSNKPGQNNR-GVTEKDAVDYSK

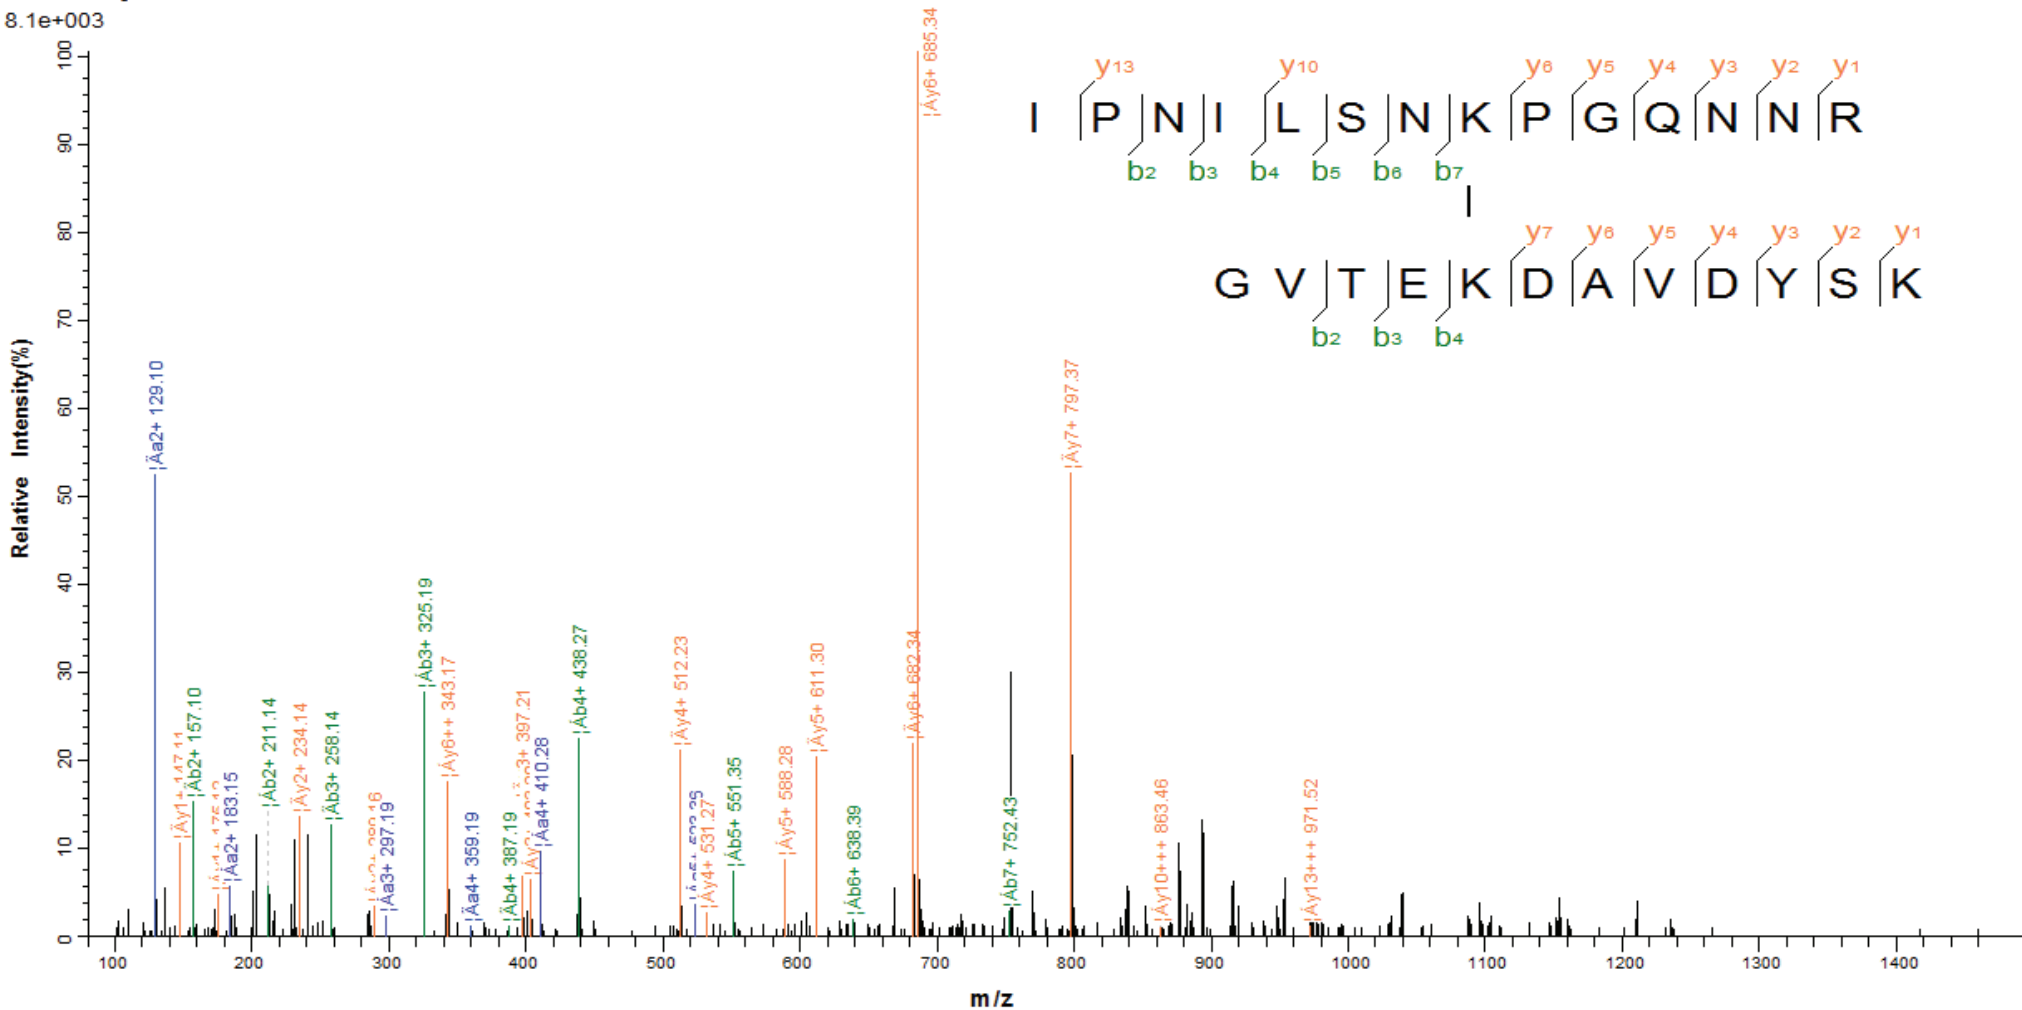

Seq: TVDPASAPNHSP E I D N L D D L V V L K K

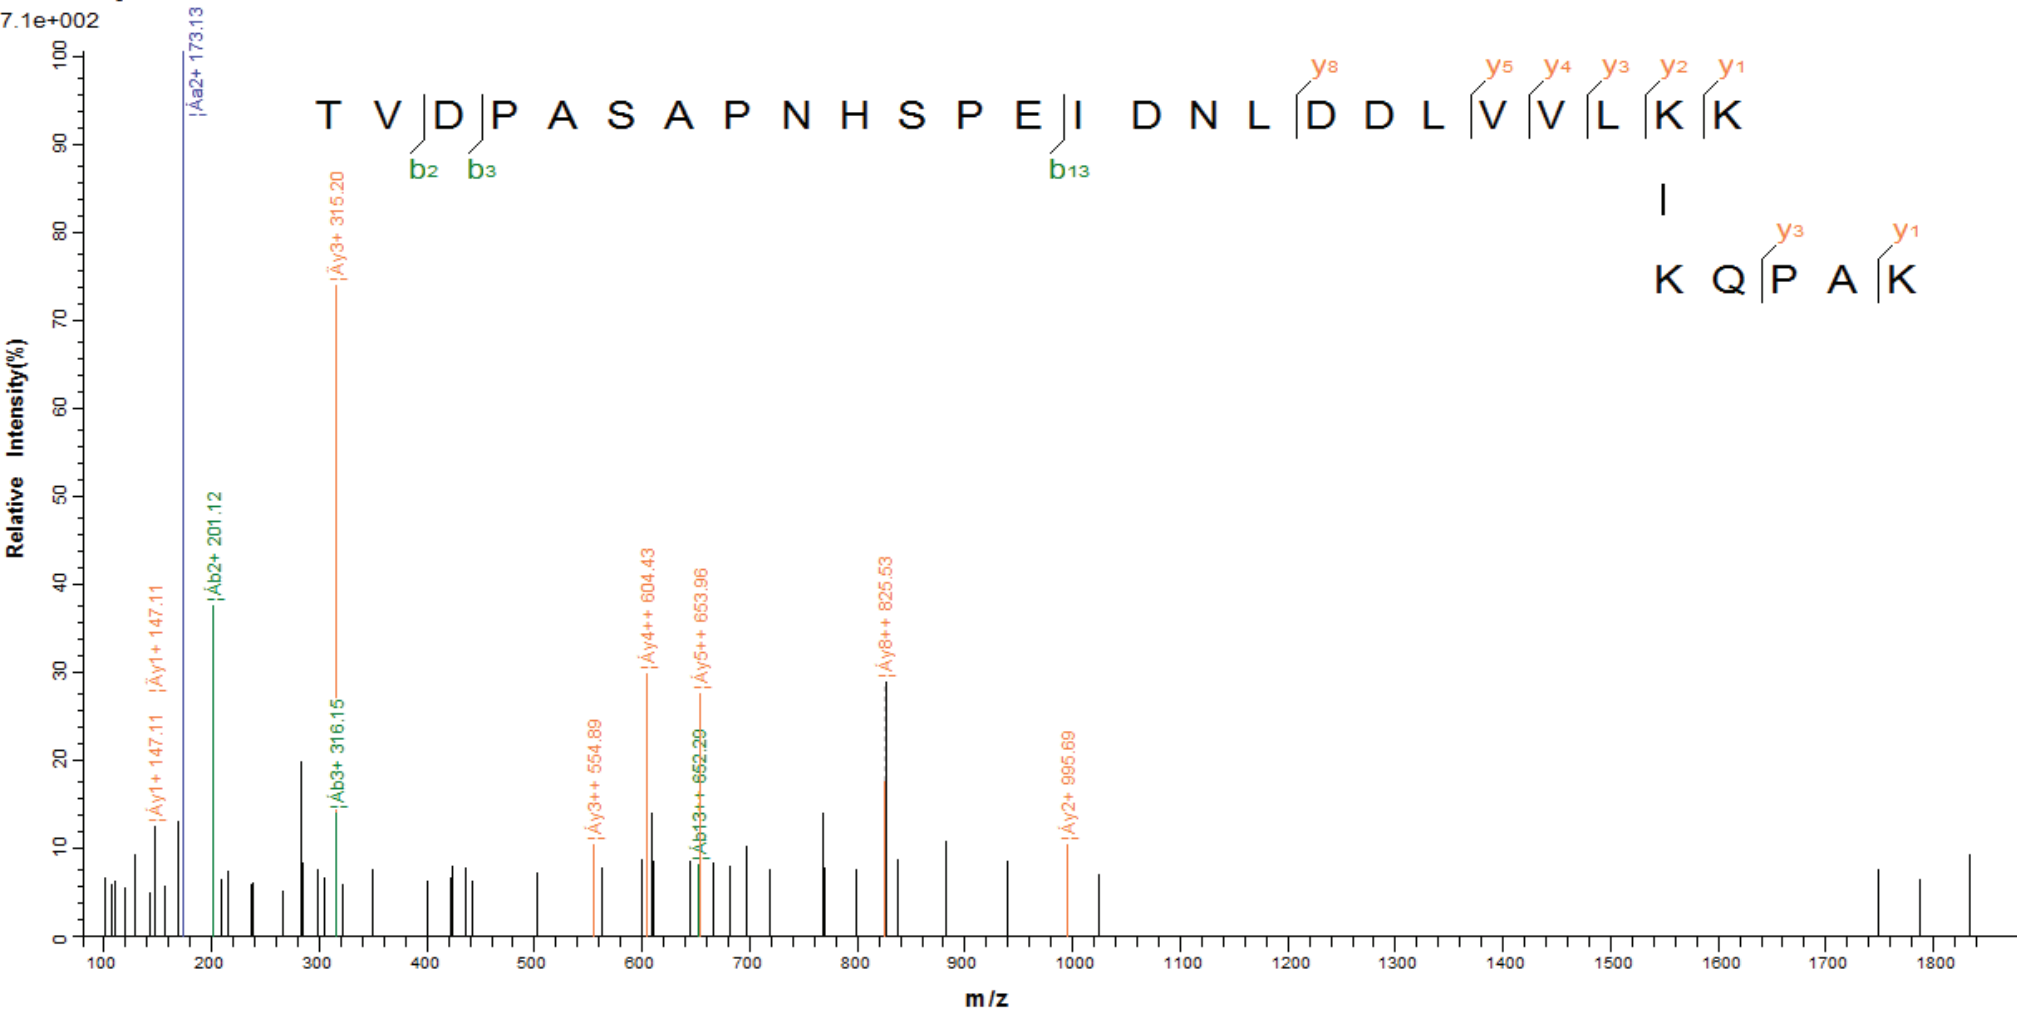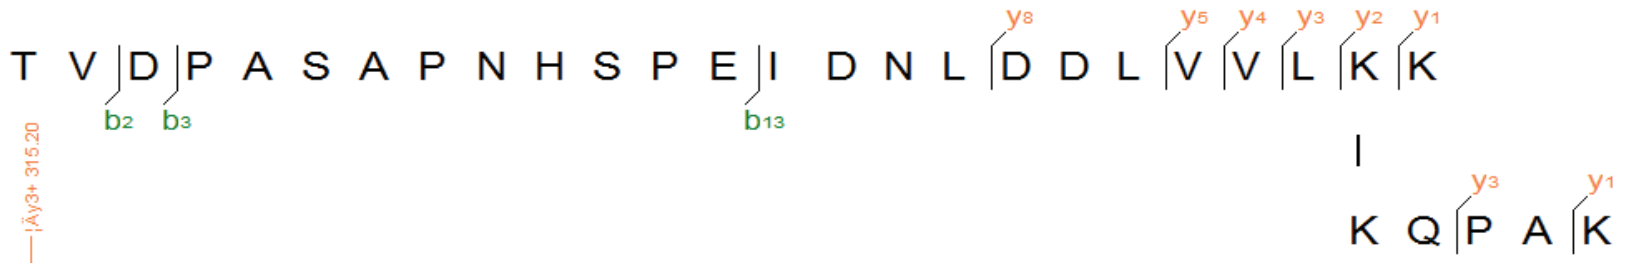

Seq: E K G V T E K D A V D Y S K

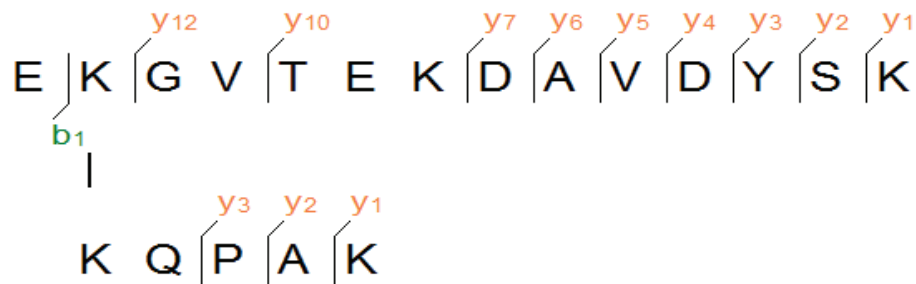

2.2e+003

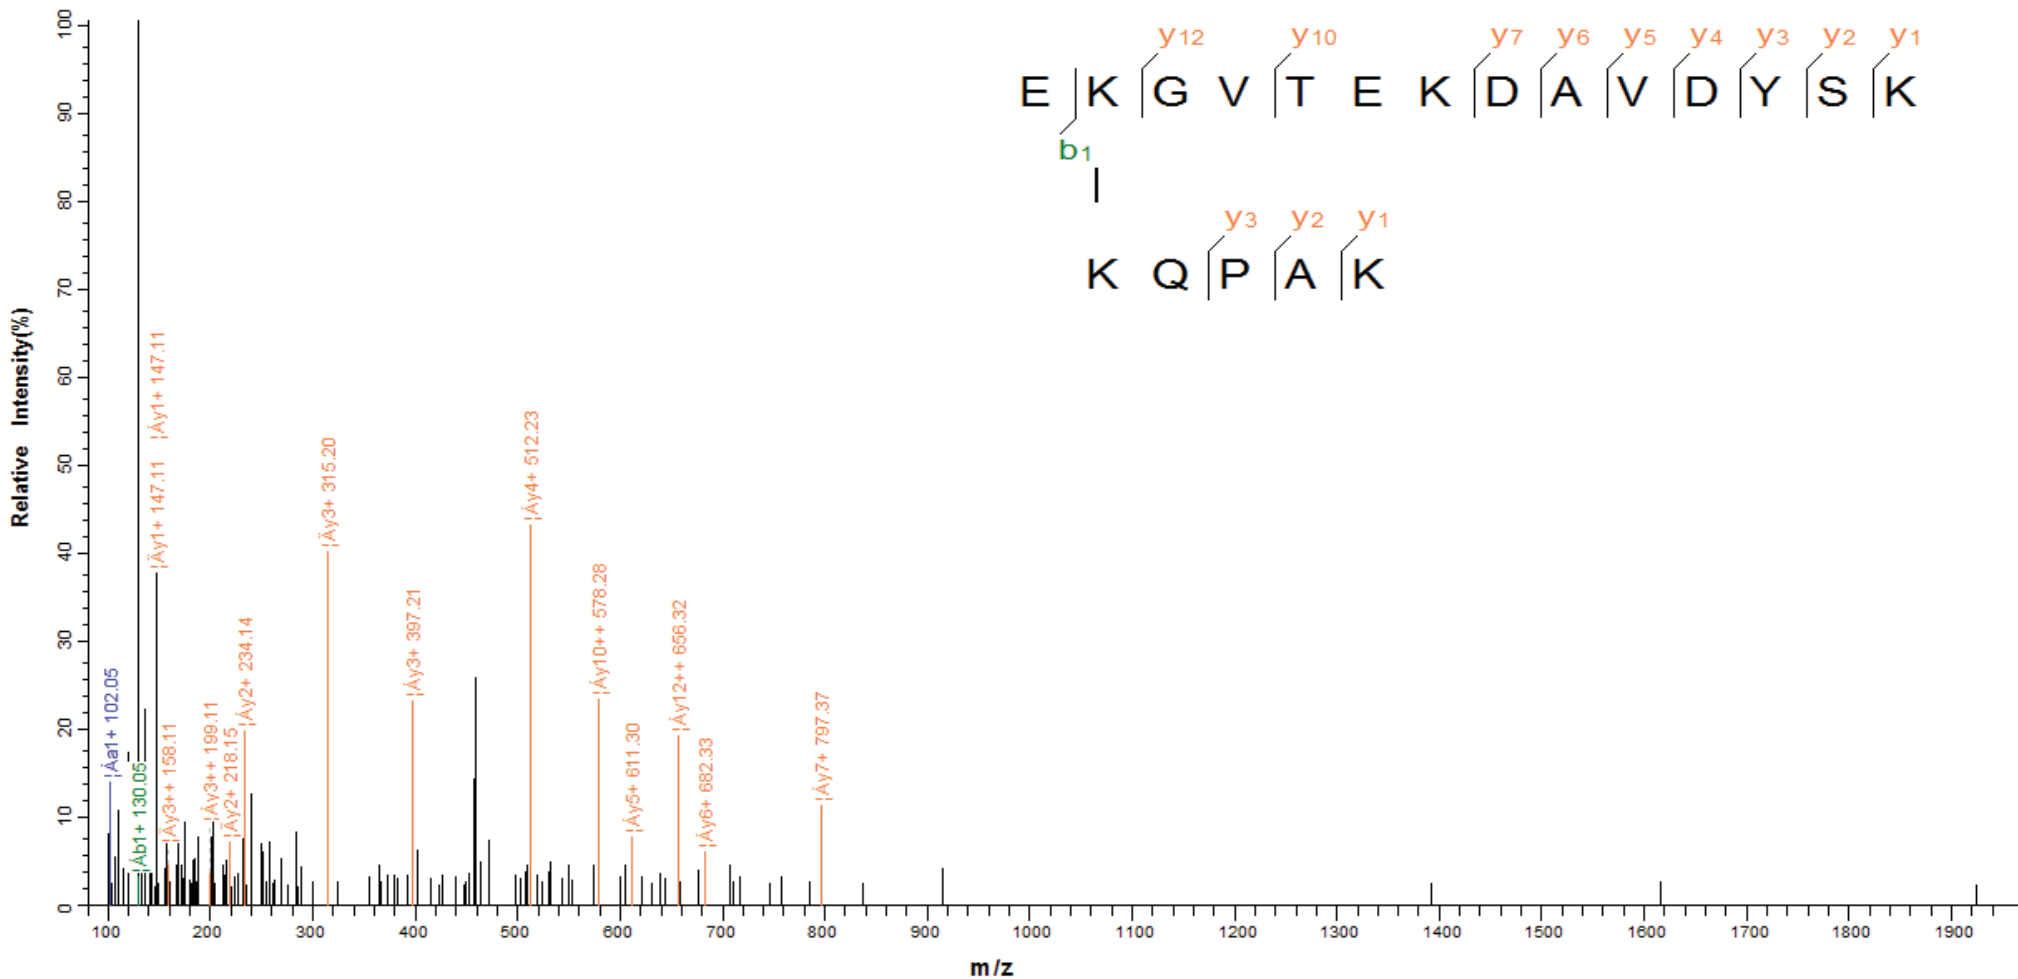



Seq: GVTEKDAVDYSK-KQPAK

5.8e+003

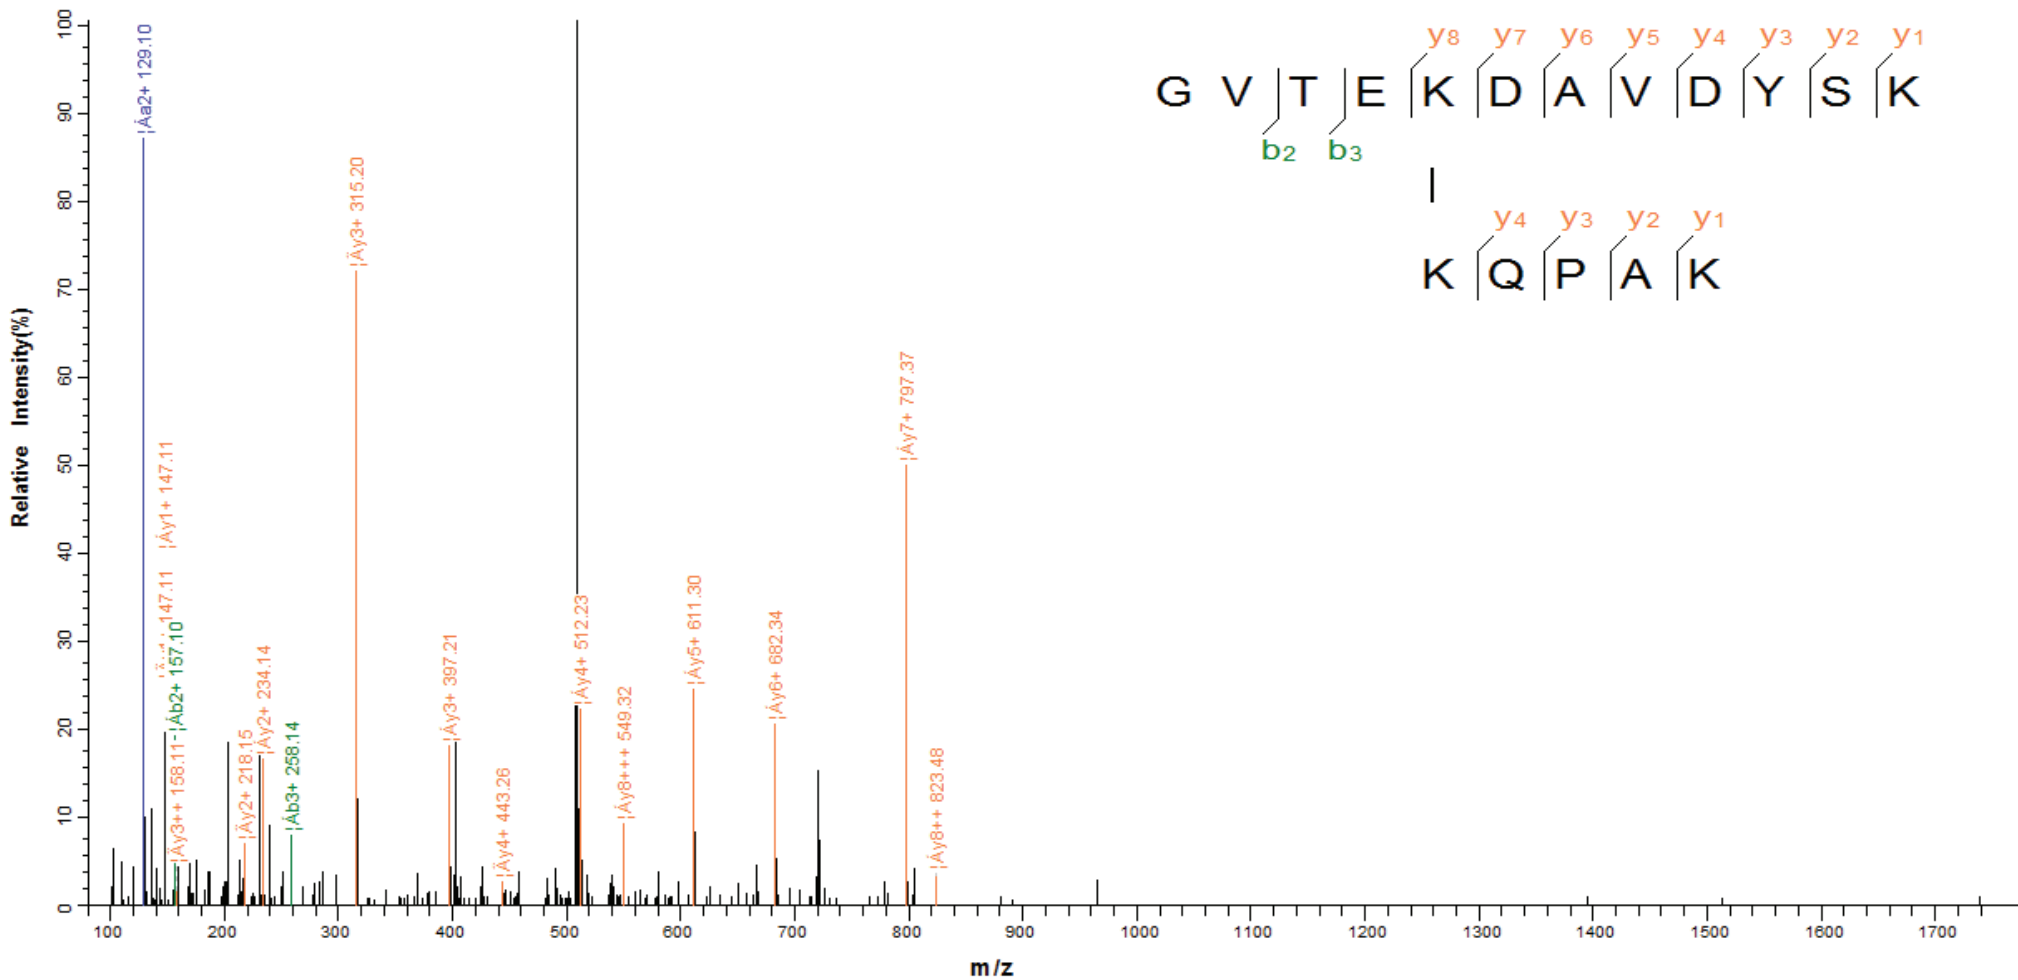

Seq: IPNILSNKPGQNNR-GVTEKDAVDYSK

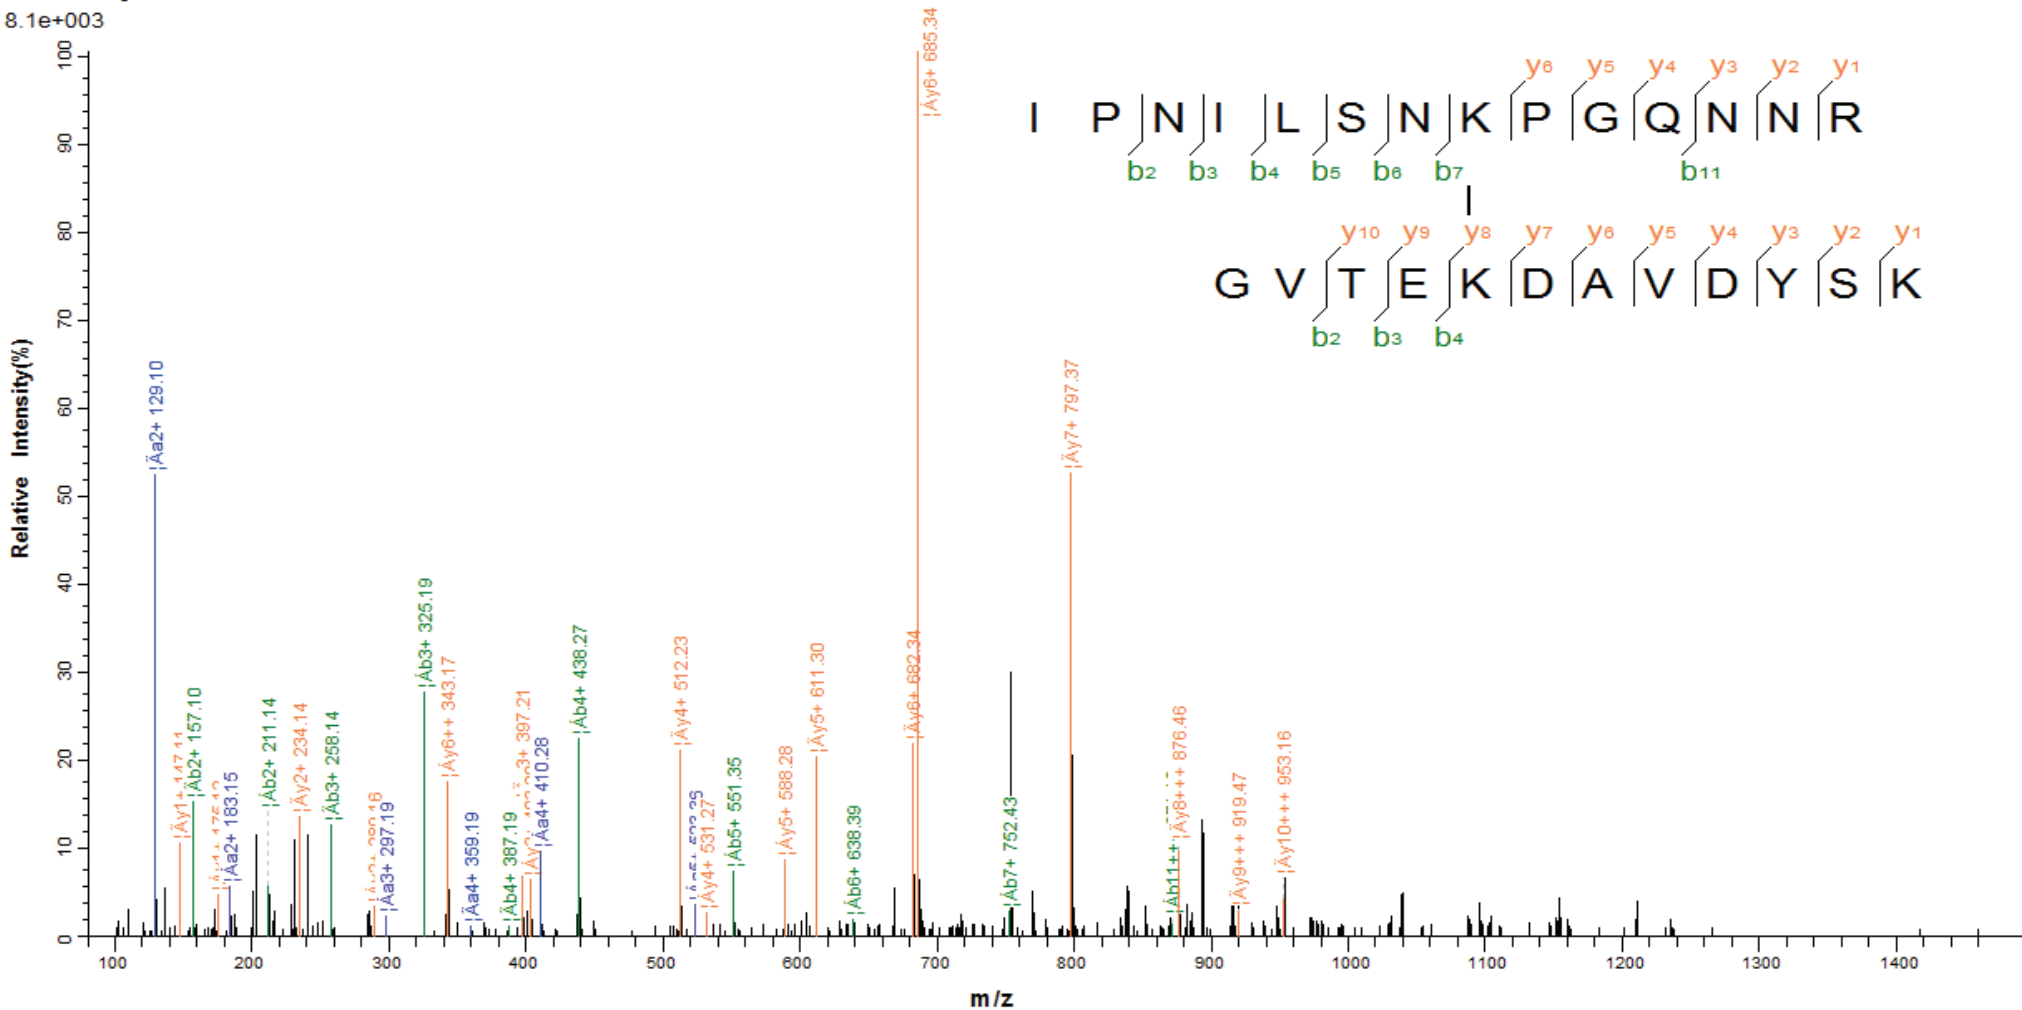

Seq: NLSFKR-RPAAKGK

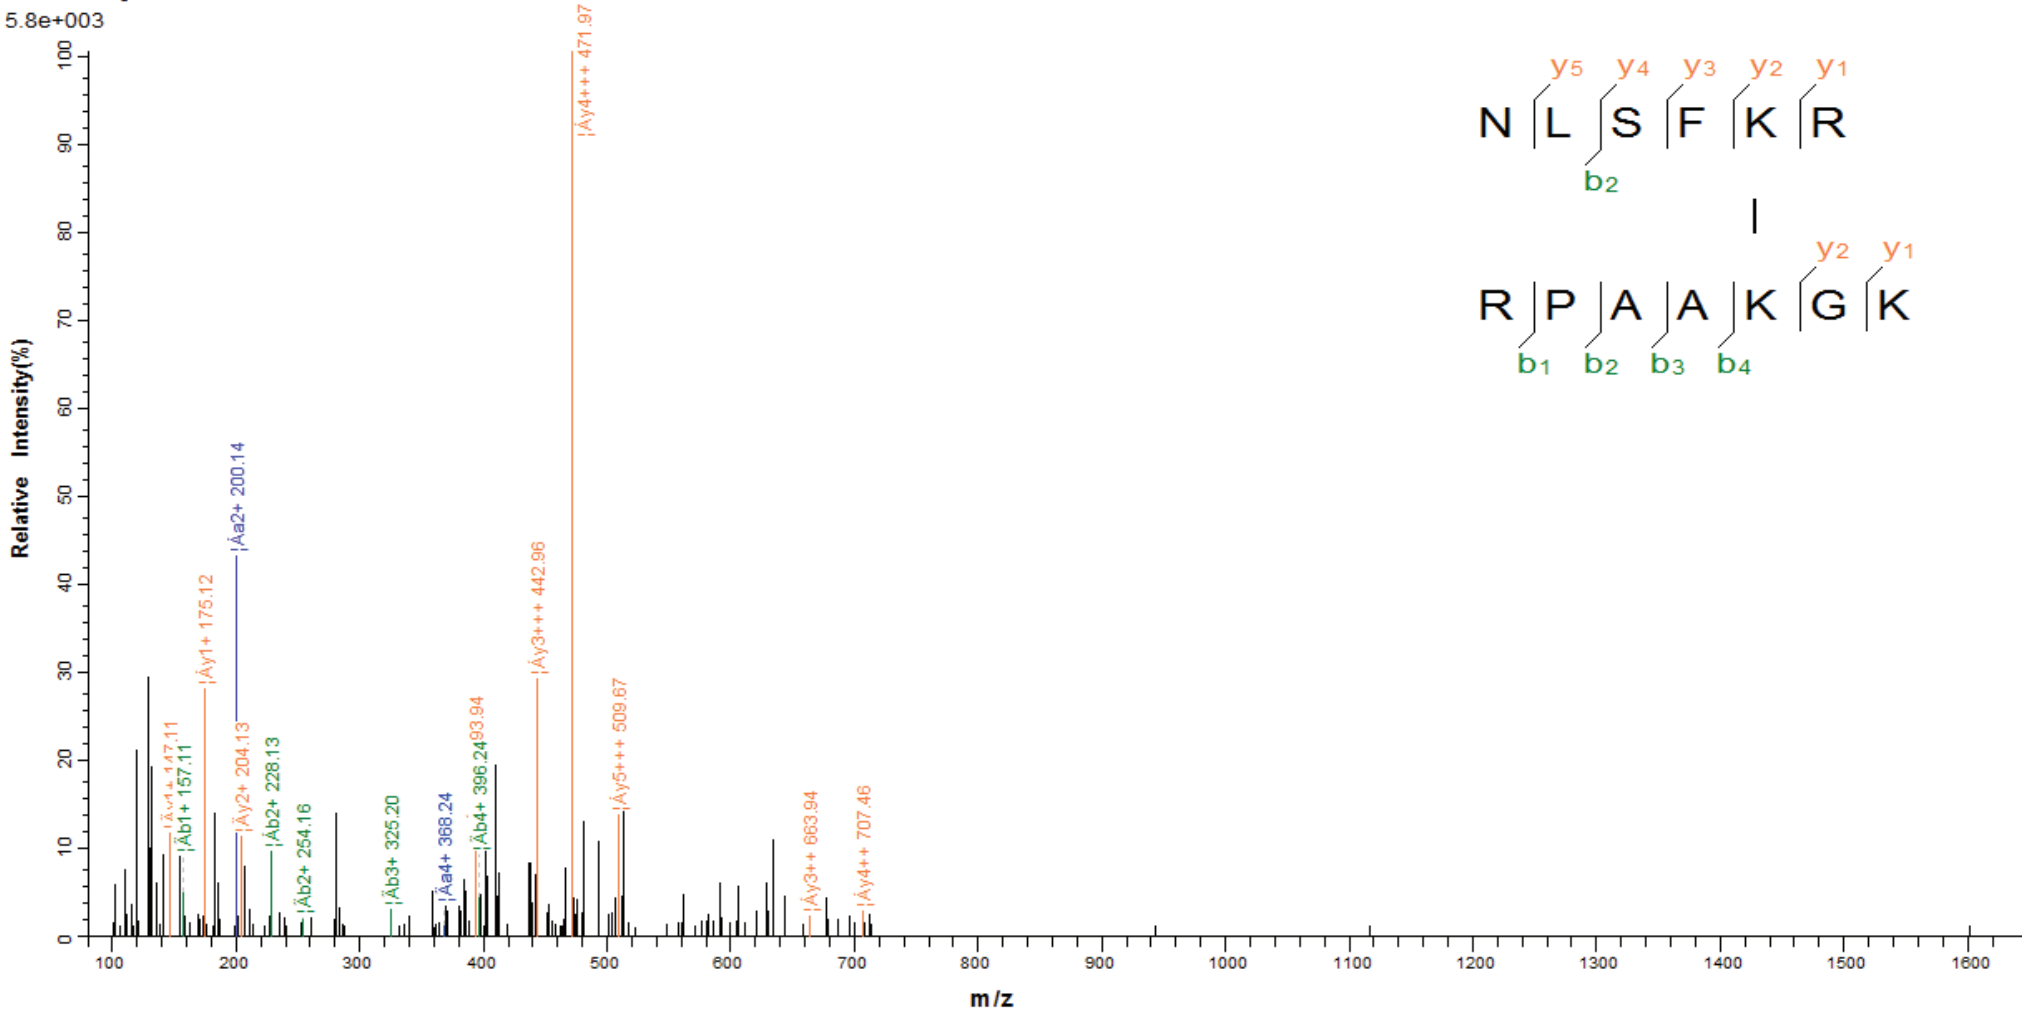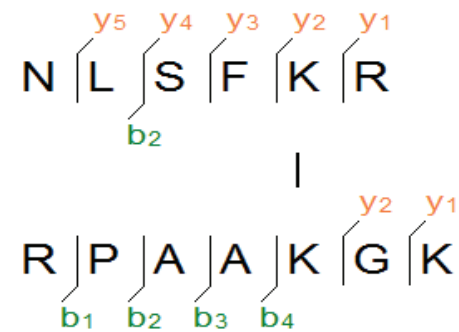

exosome\_A8\_140503145423.2856.2856.4.dta Seq: LKSQMDTSK-IITLVKGP

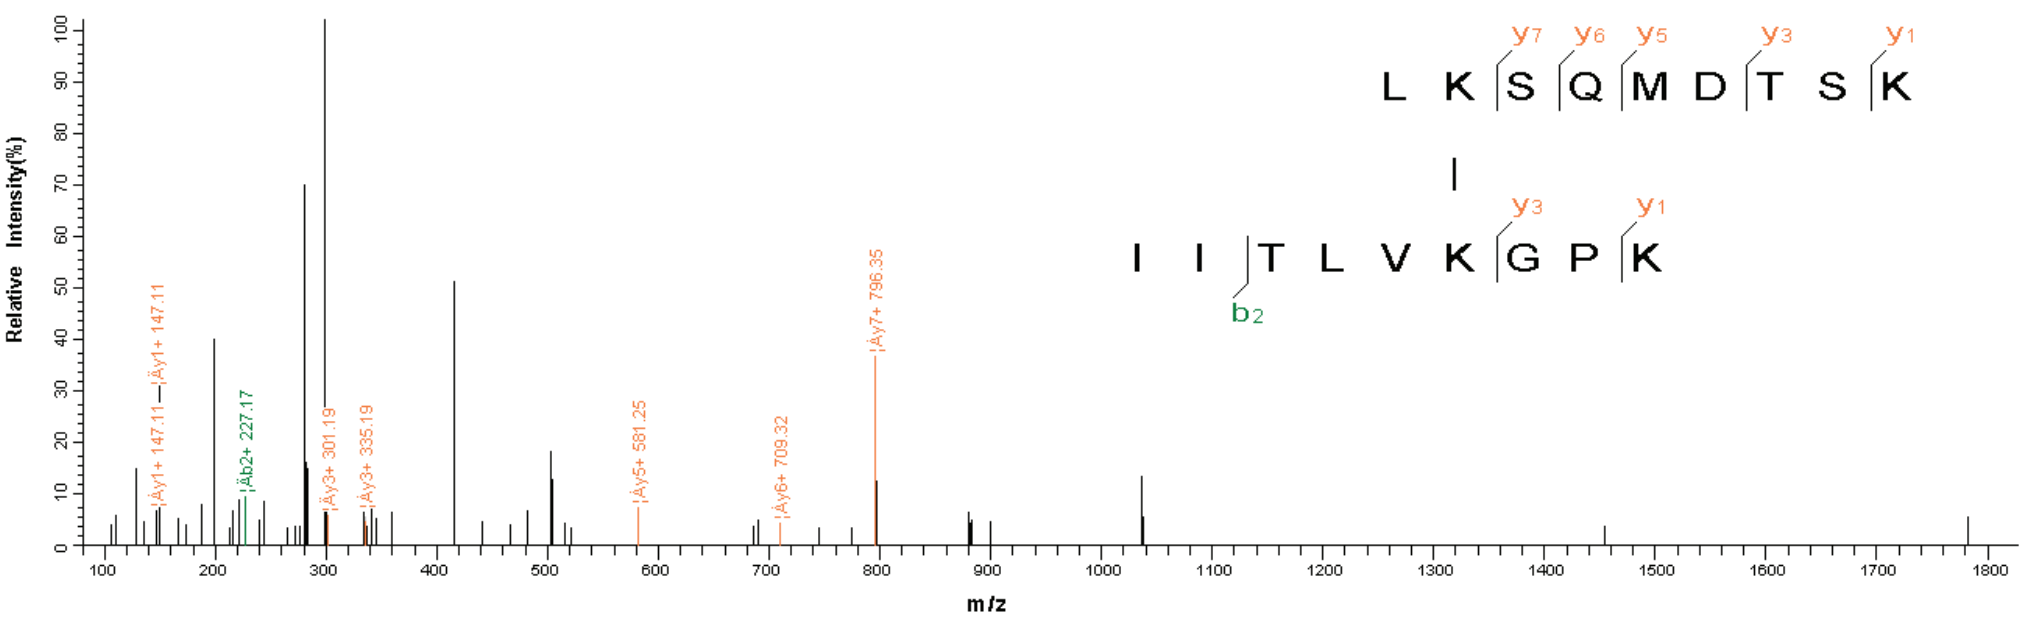

Seq: LKSQMDTSK-GPKEPR Mod: 5, Oxidation\_M\_15.995

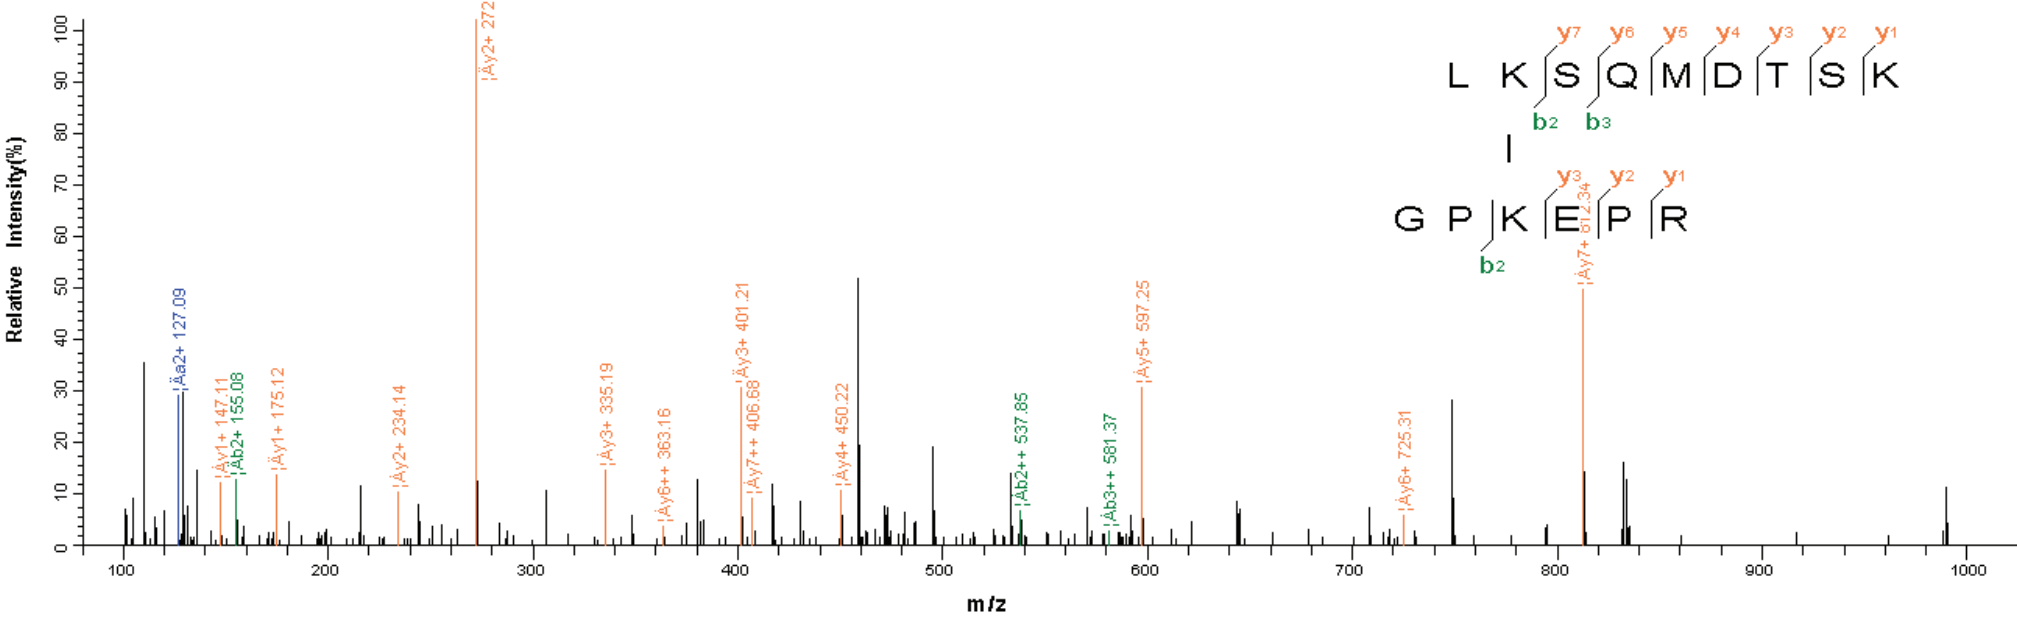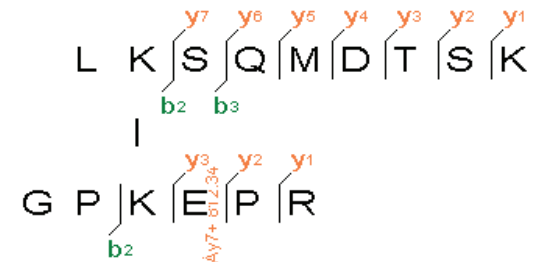

Seq: FSKFER-SKSSHK

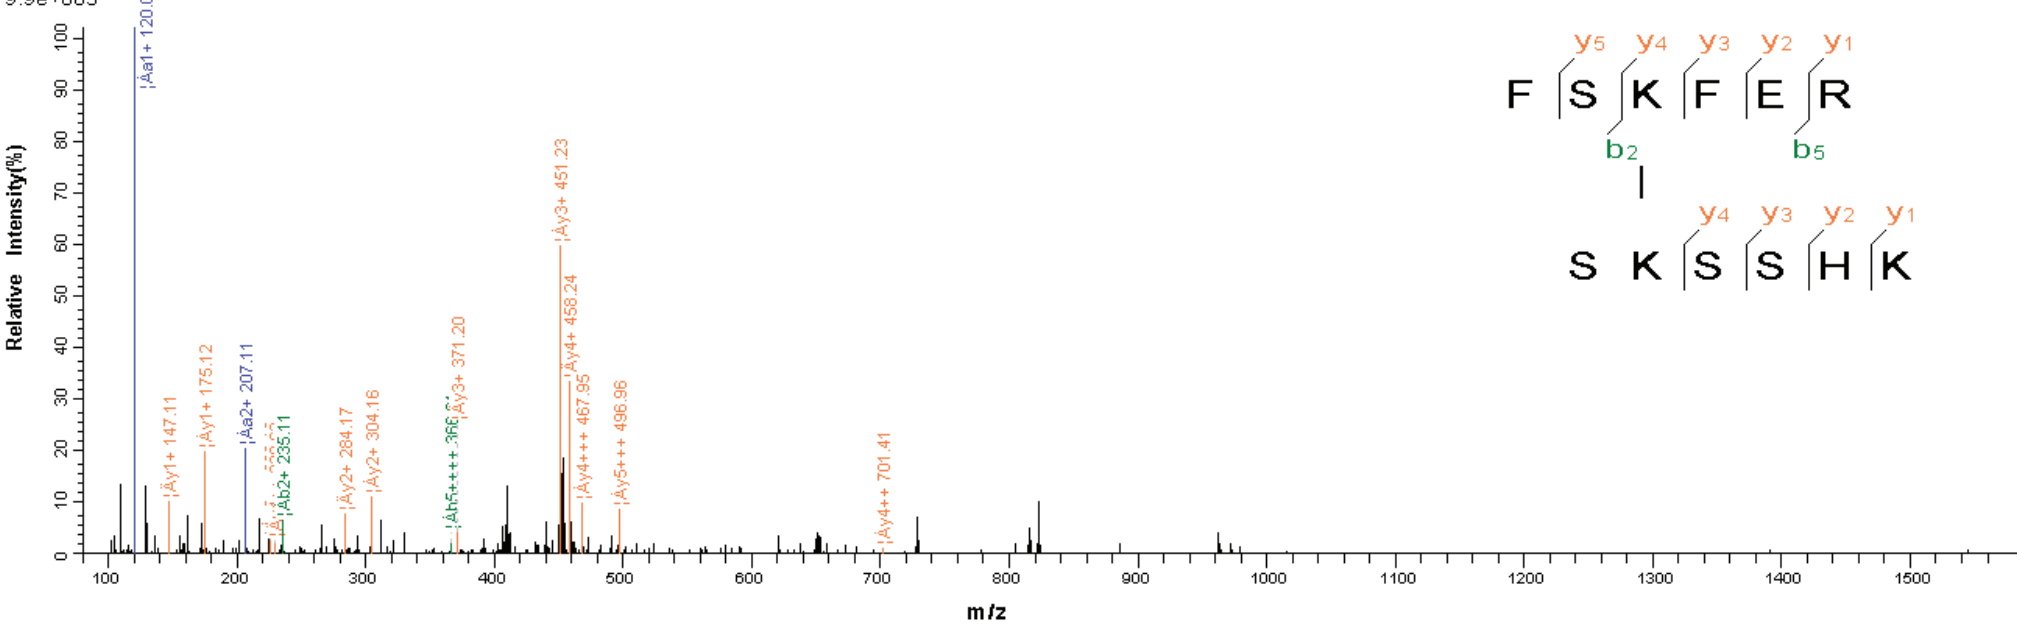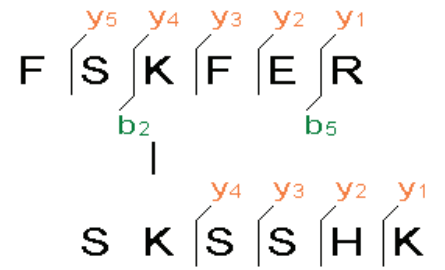

exosome\_A9\_140503145423.292.292.4.dta Seq: SKSSHKNER-FSKFER

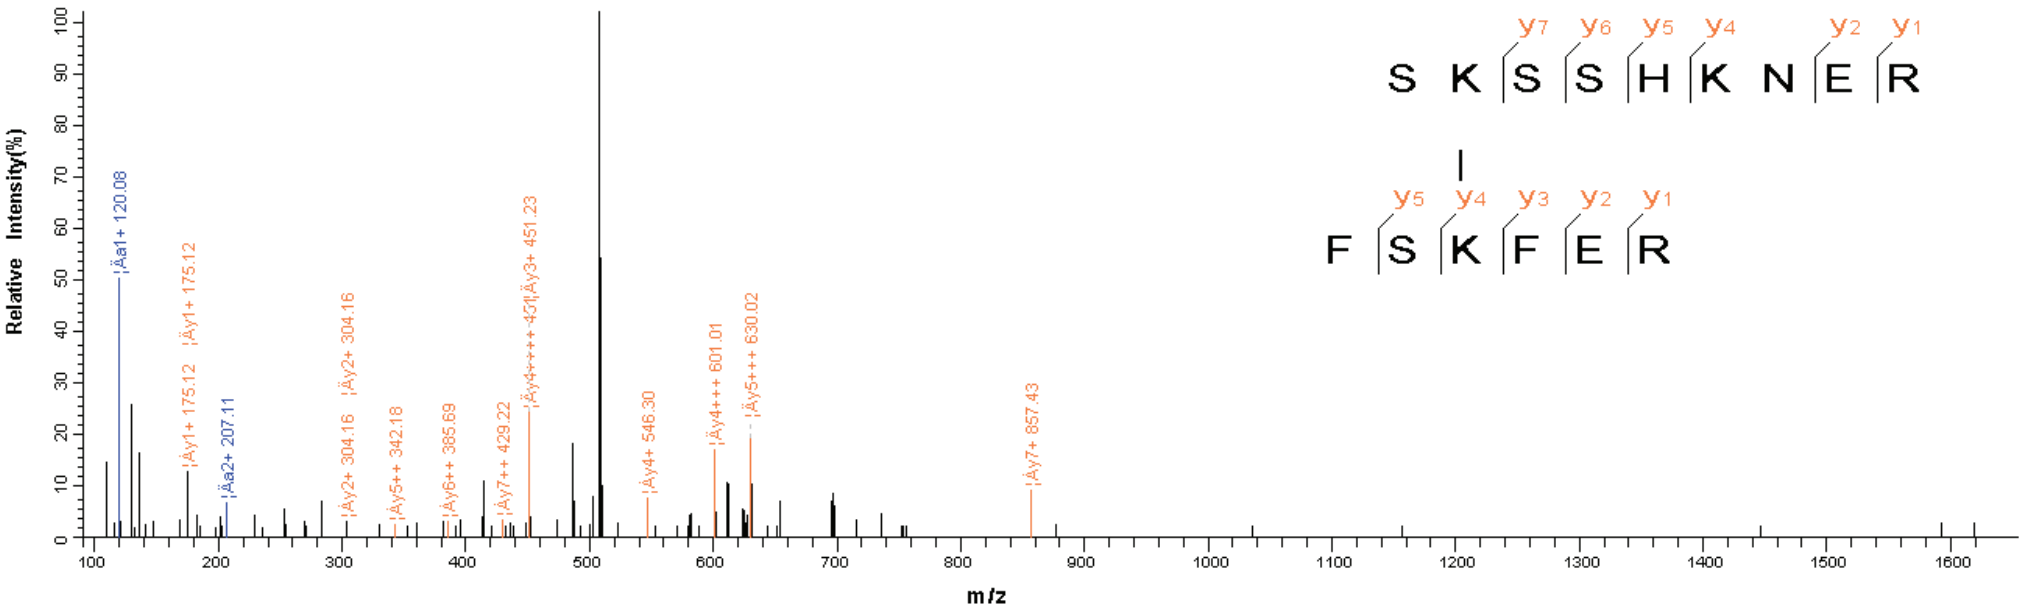

Seq: SSKHNER-PSKFER Score: 7.44e-007

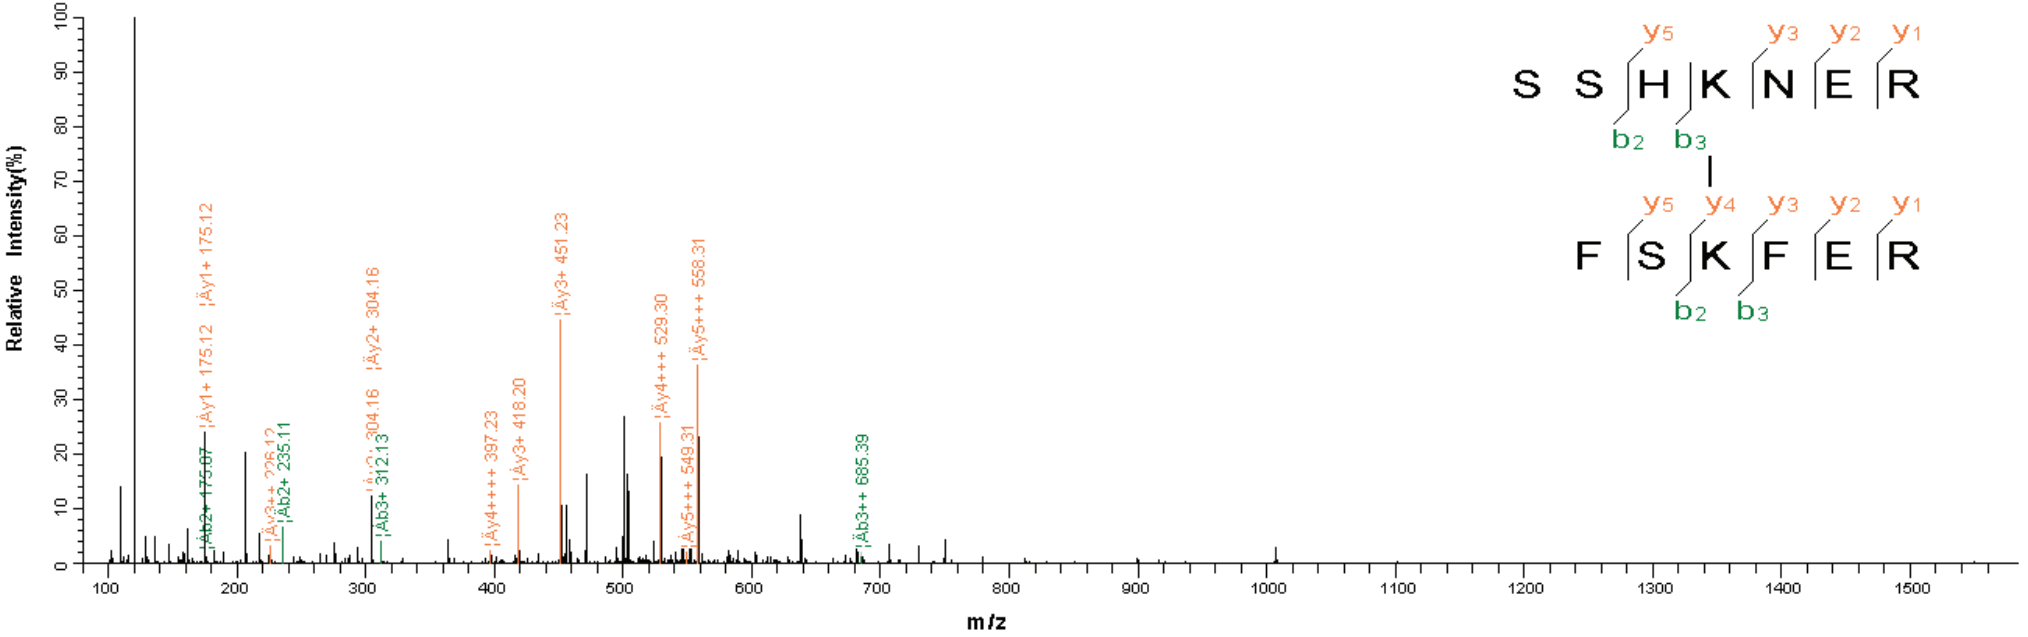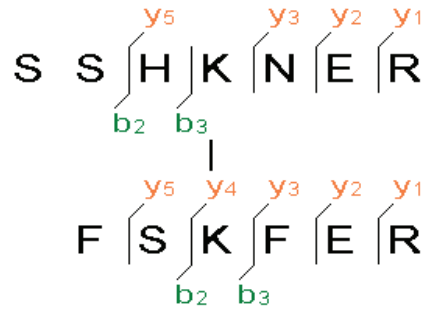



Seq: SVTLDSKENELPTK-KTSQMDLAR

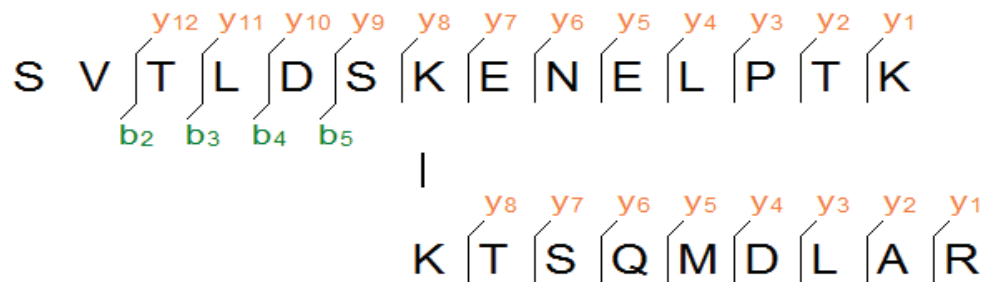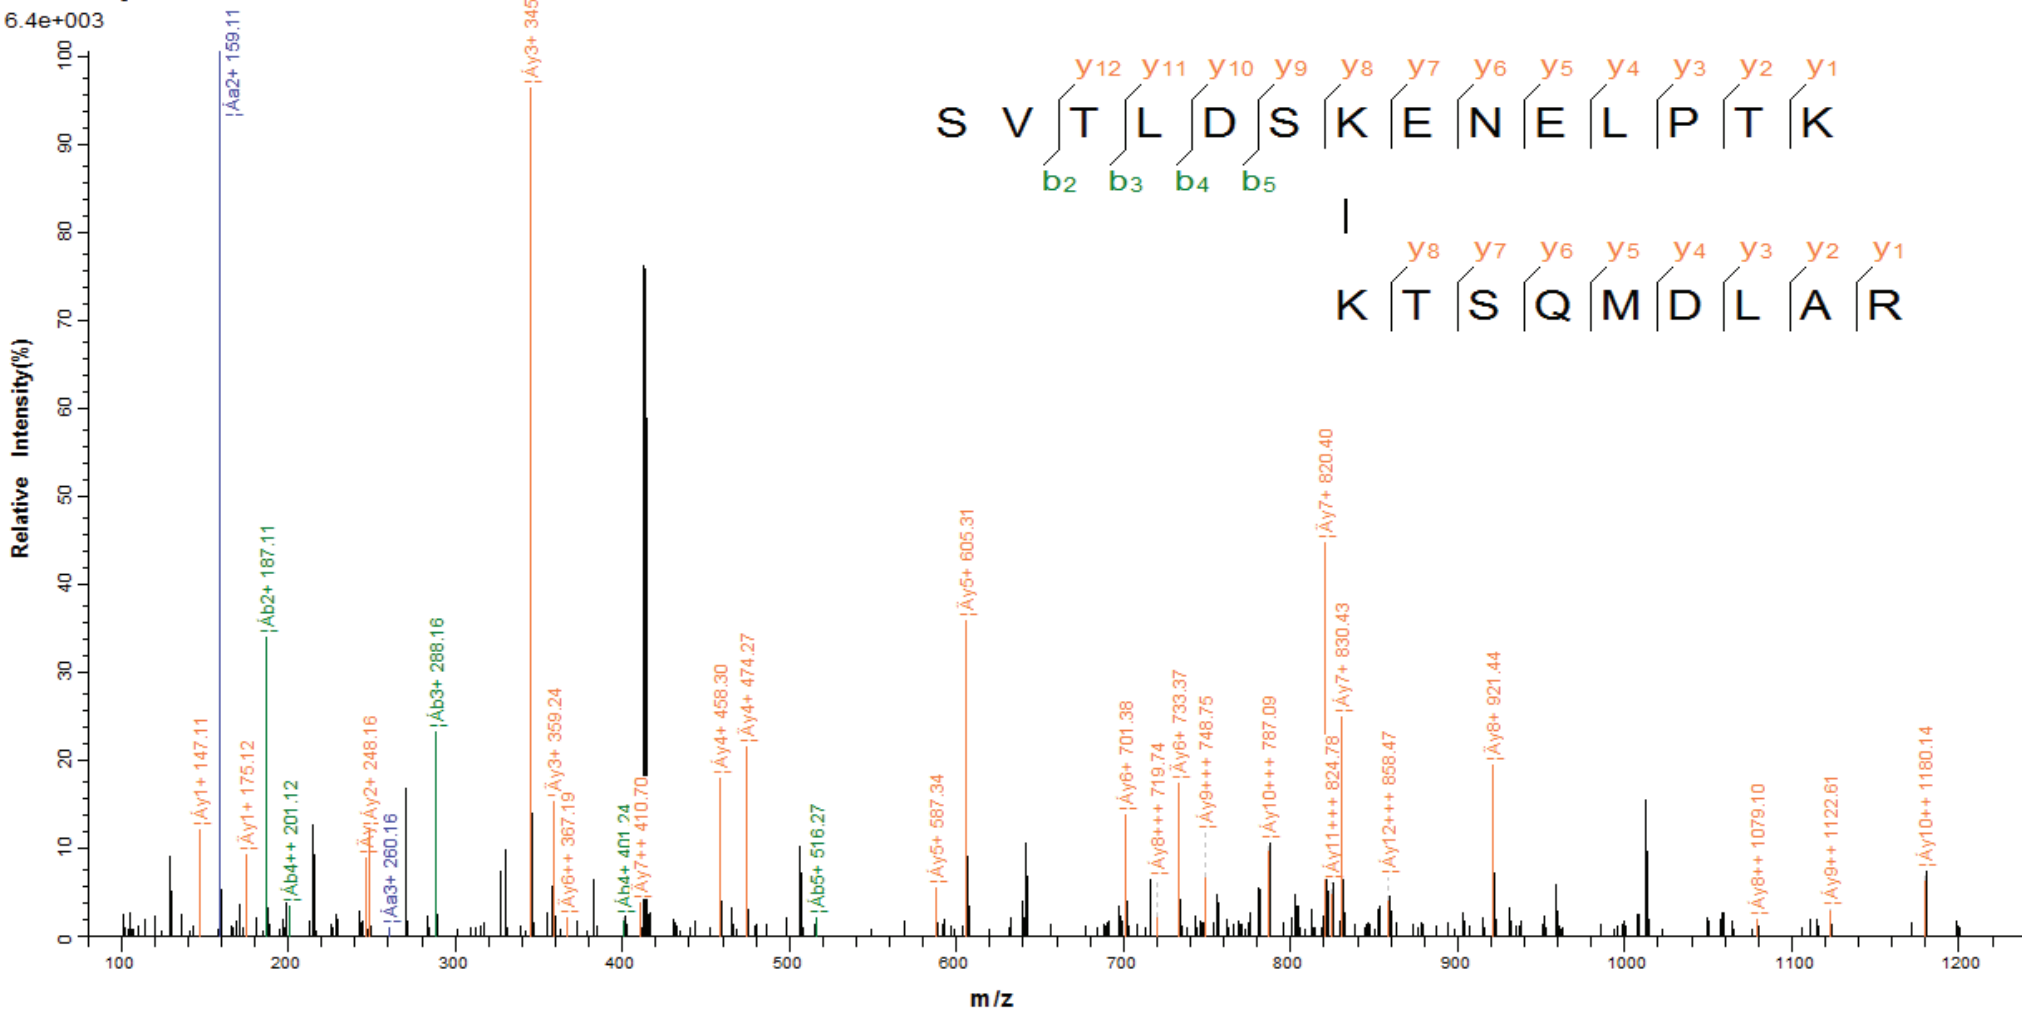

Seq: SVTLDSKENELPTK-SNSDLEKQGK

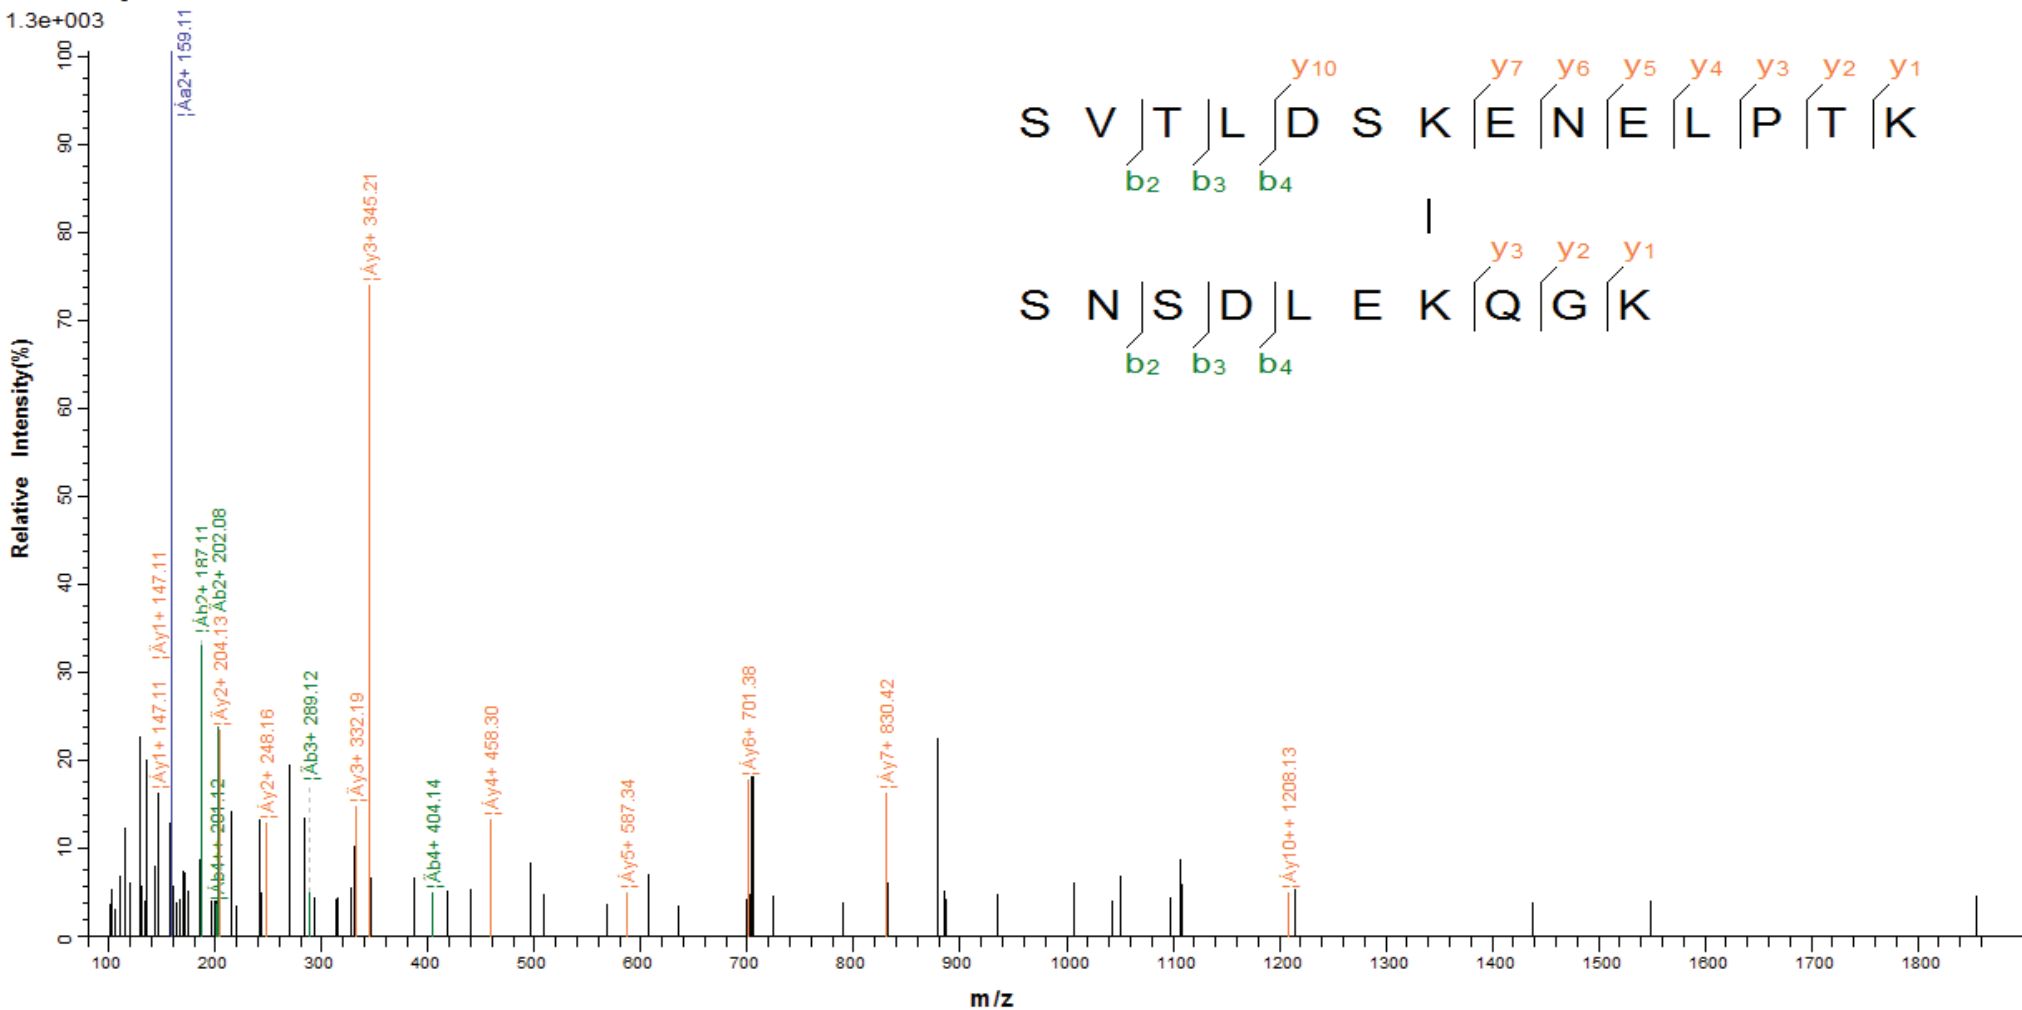

Seq: ENELPTKR-KSPDDK

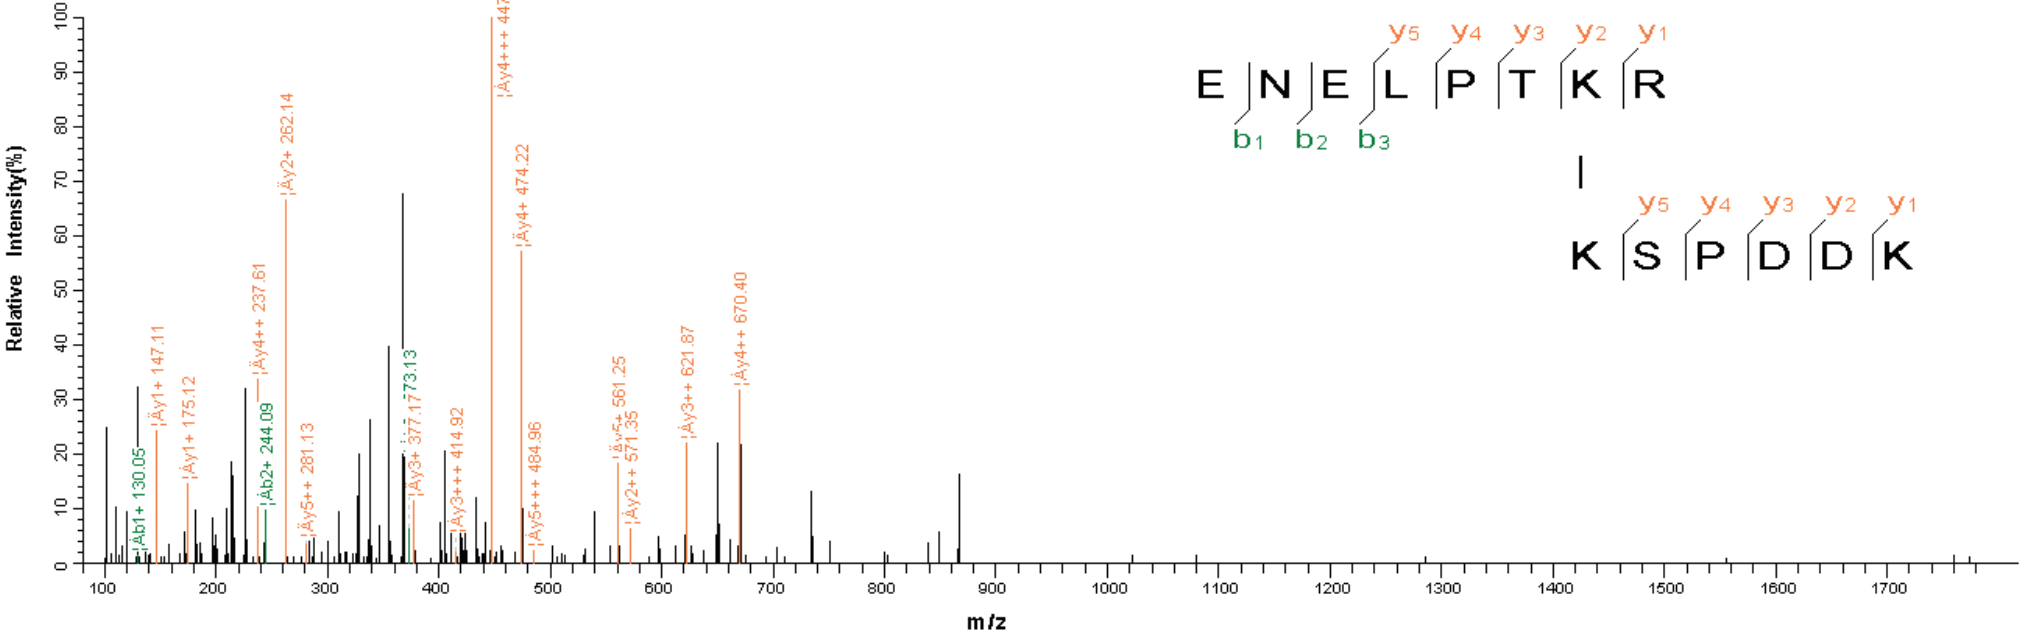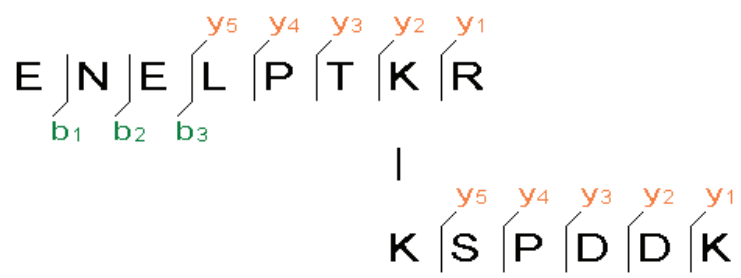

Seq: ENELPTKR-KSNSDLEK

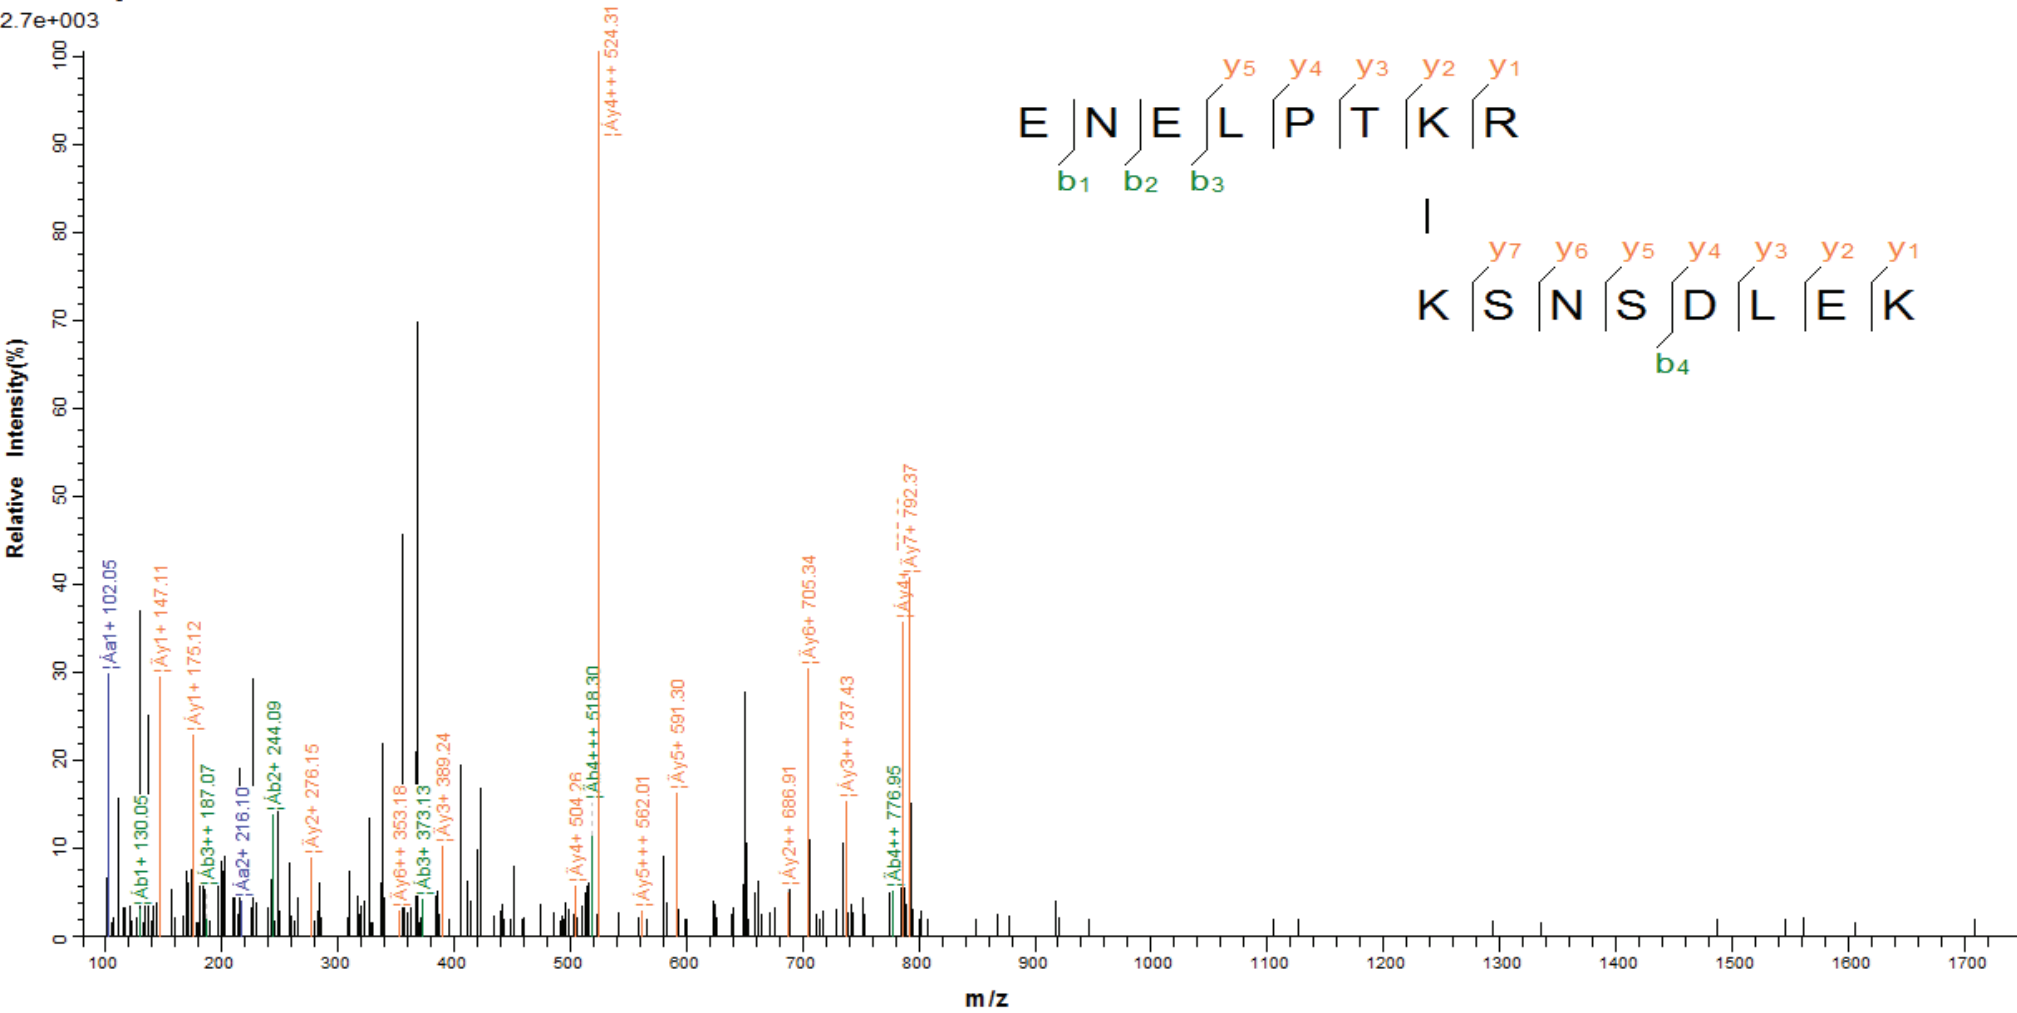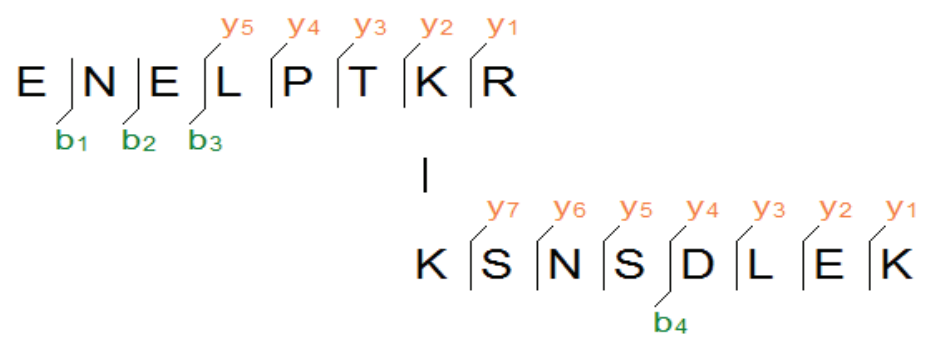

Seq: KSPDDKLNLEESWK-ENELPTKR

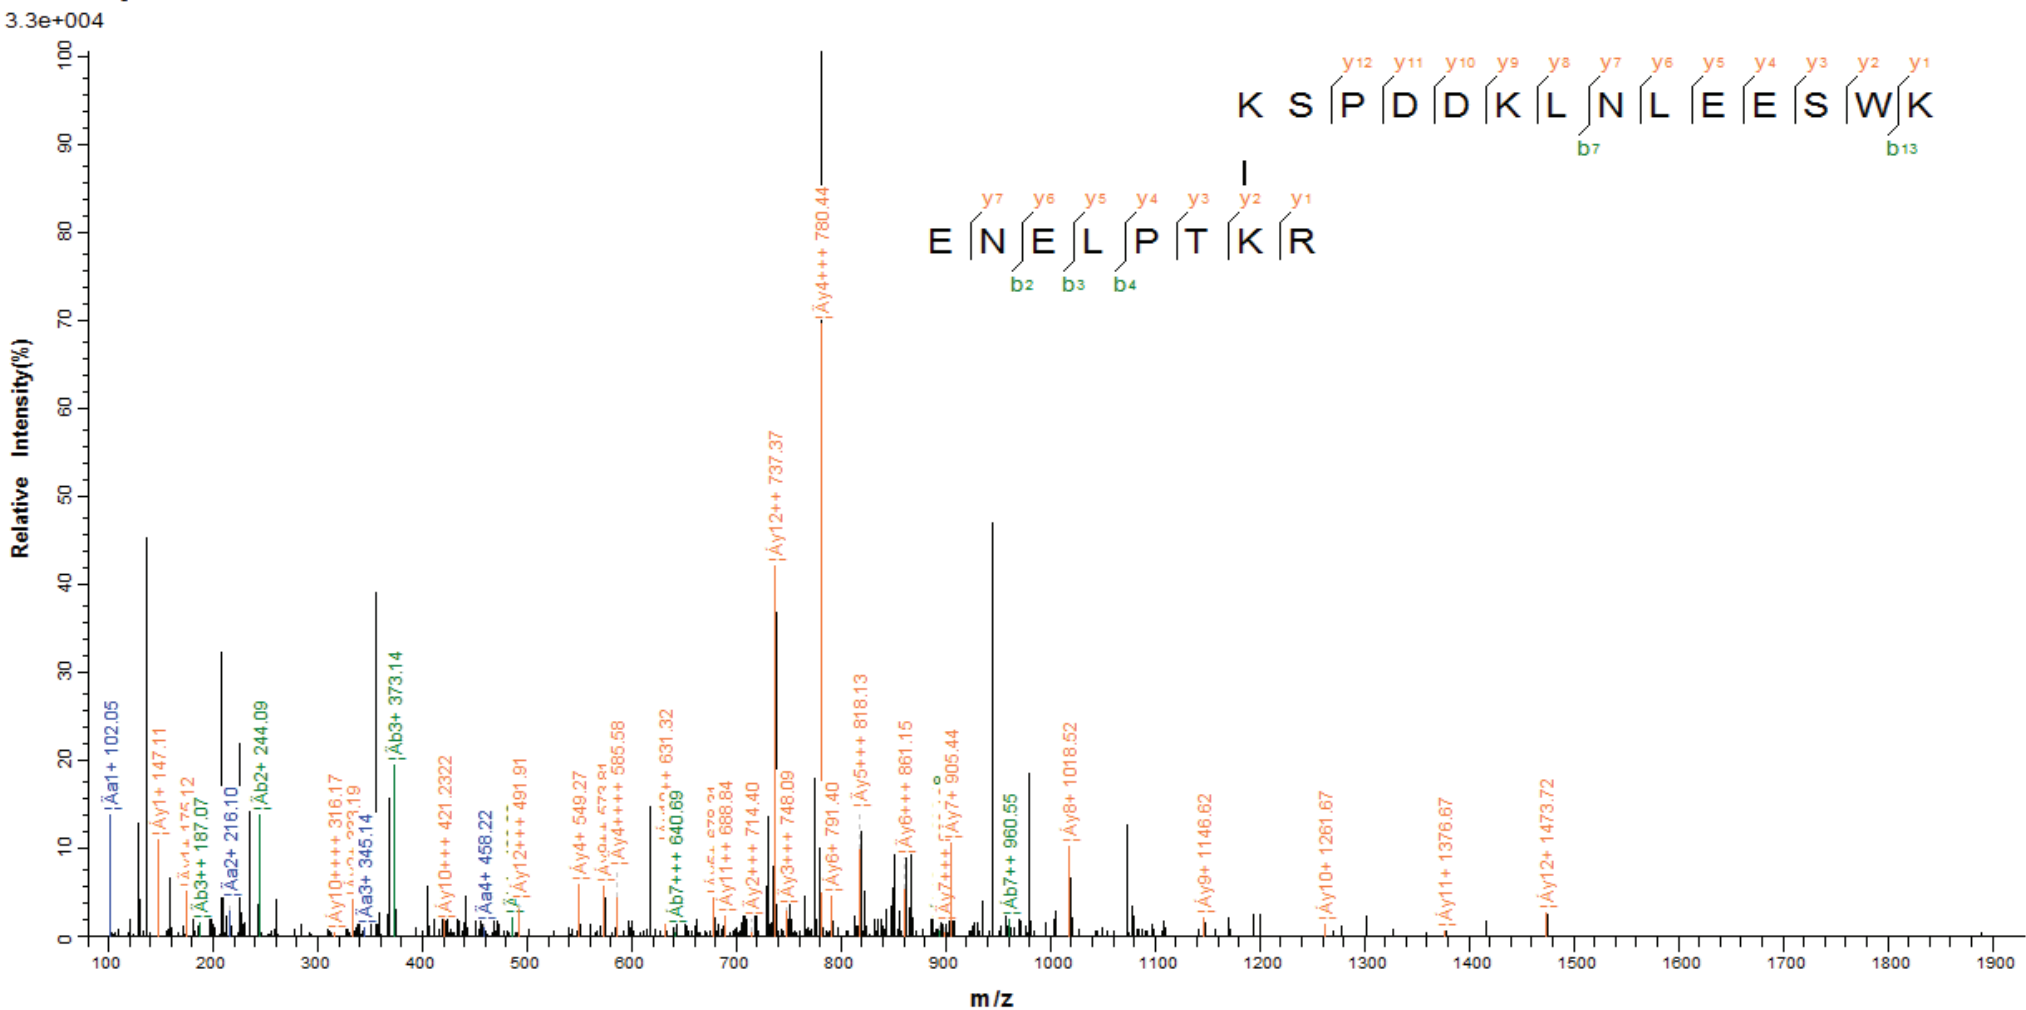

Seq: KSPDDKLNLEESWK-ENELPTKR

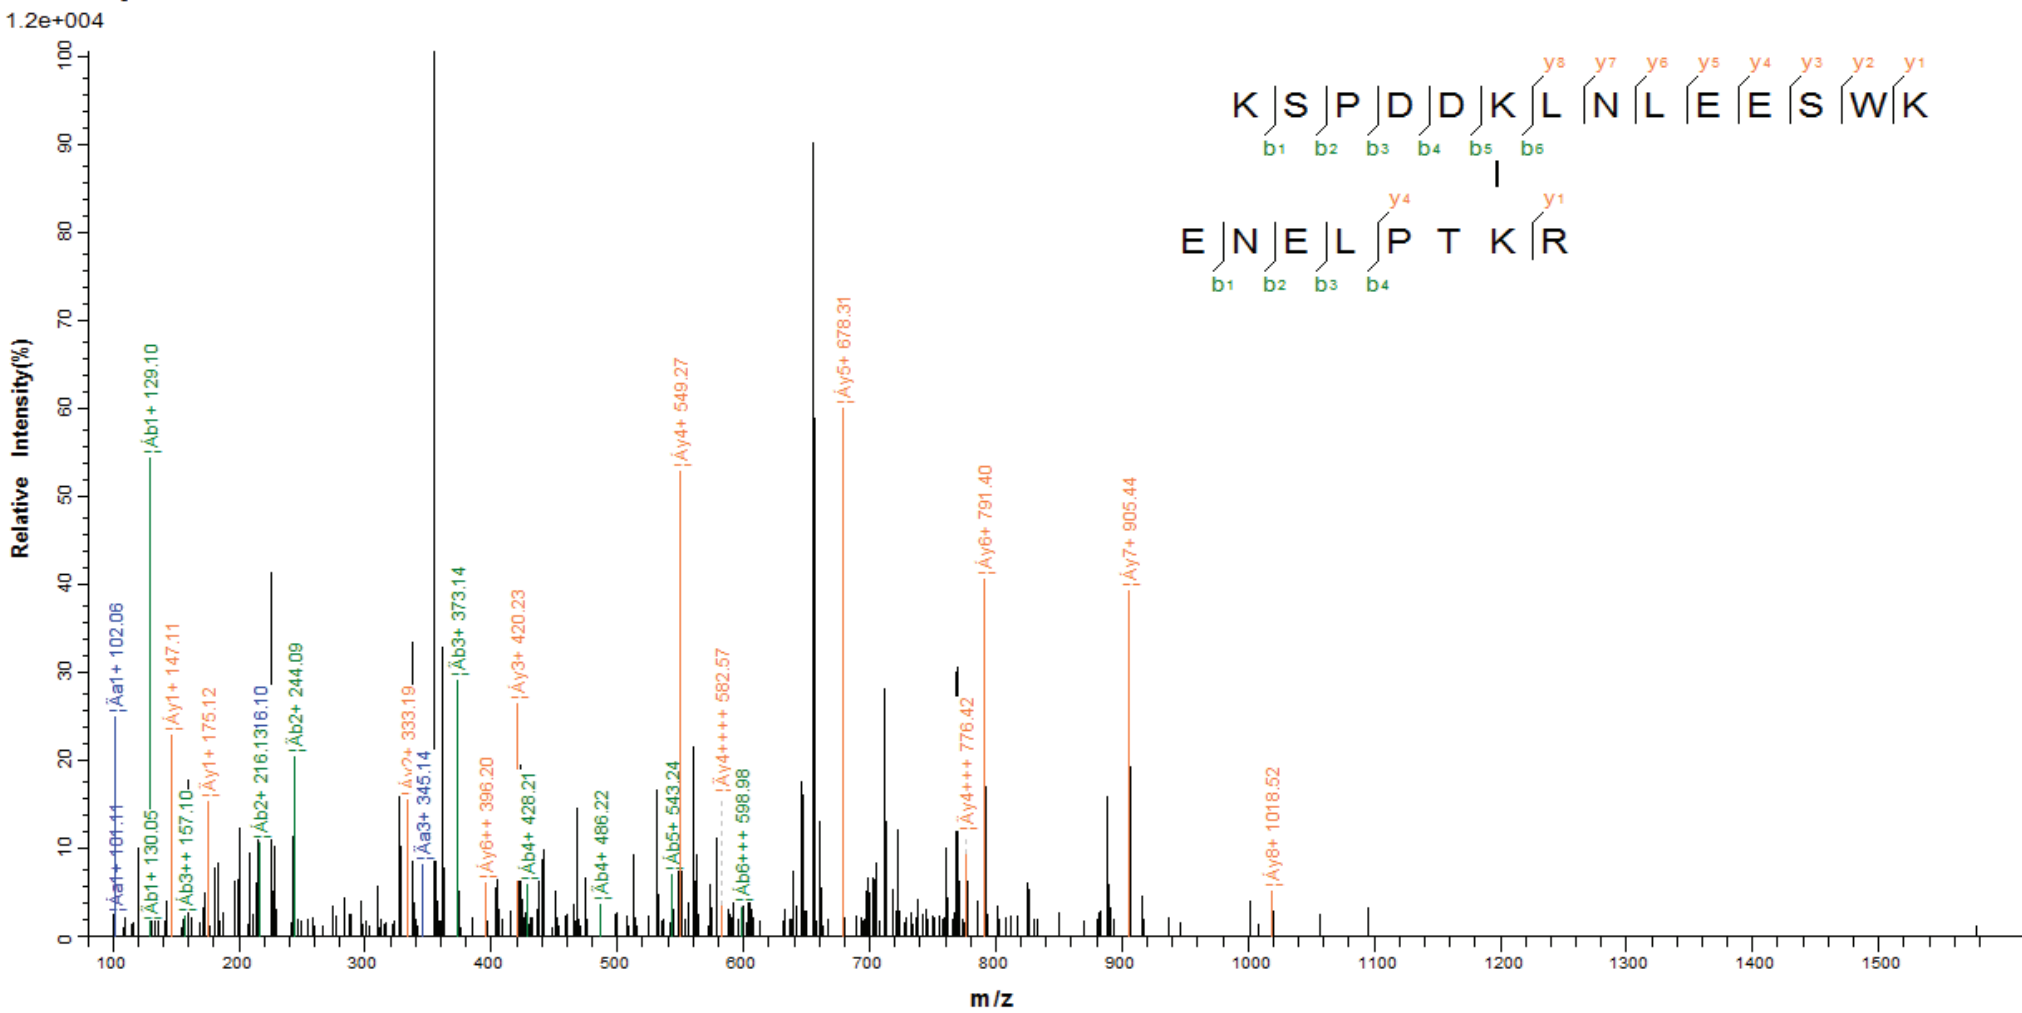

Seq: SKGLLSADQSHSTSK-ETKDNNAETK

5.6e+002

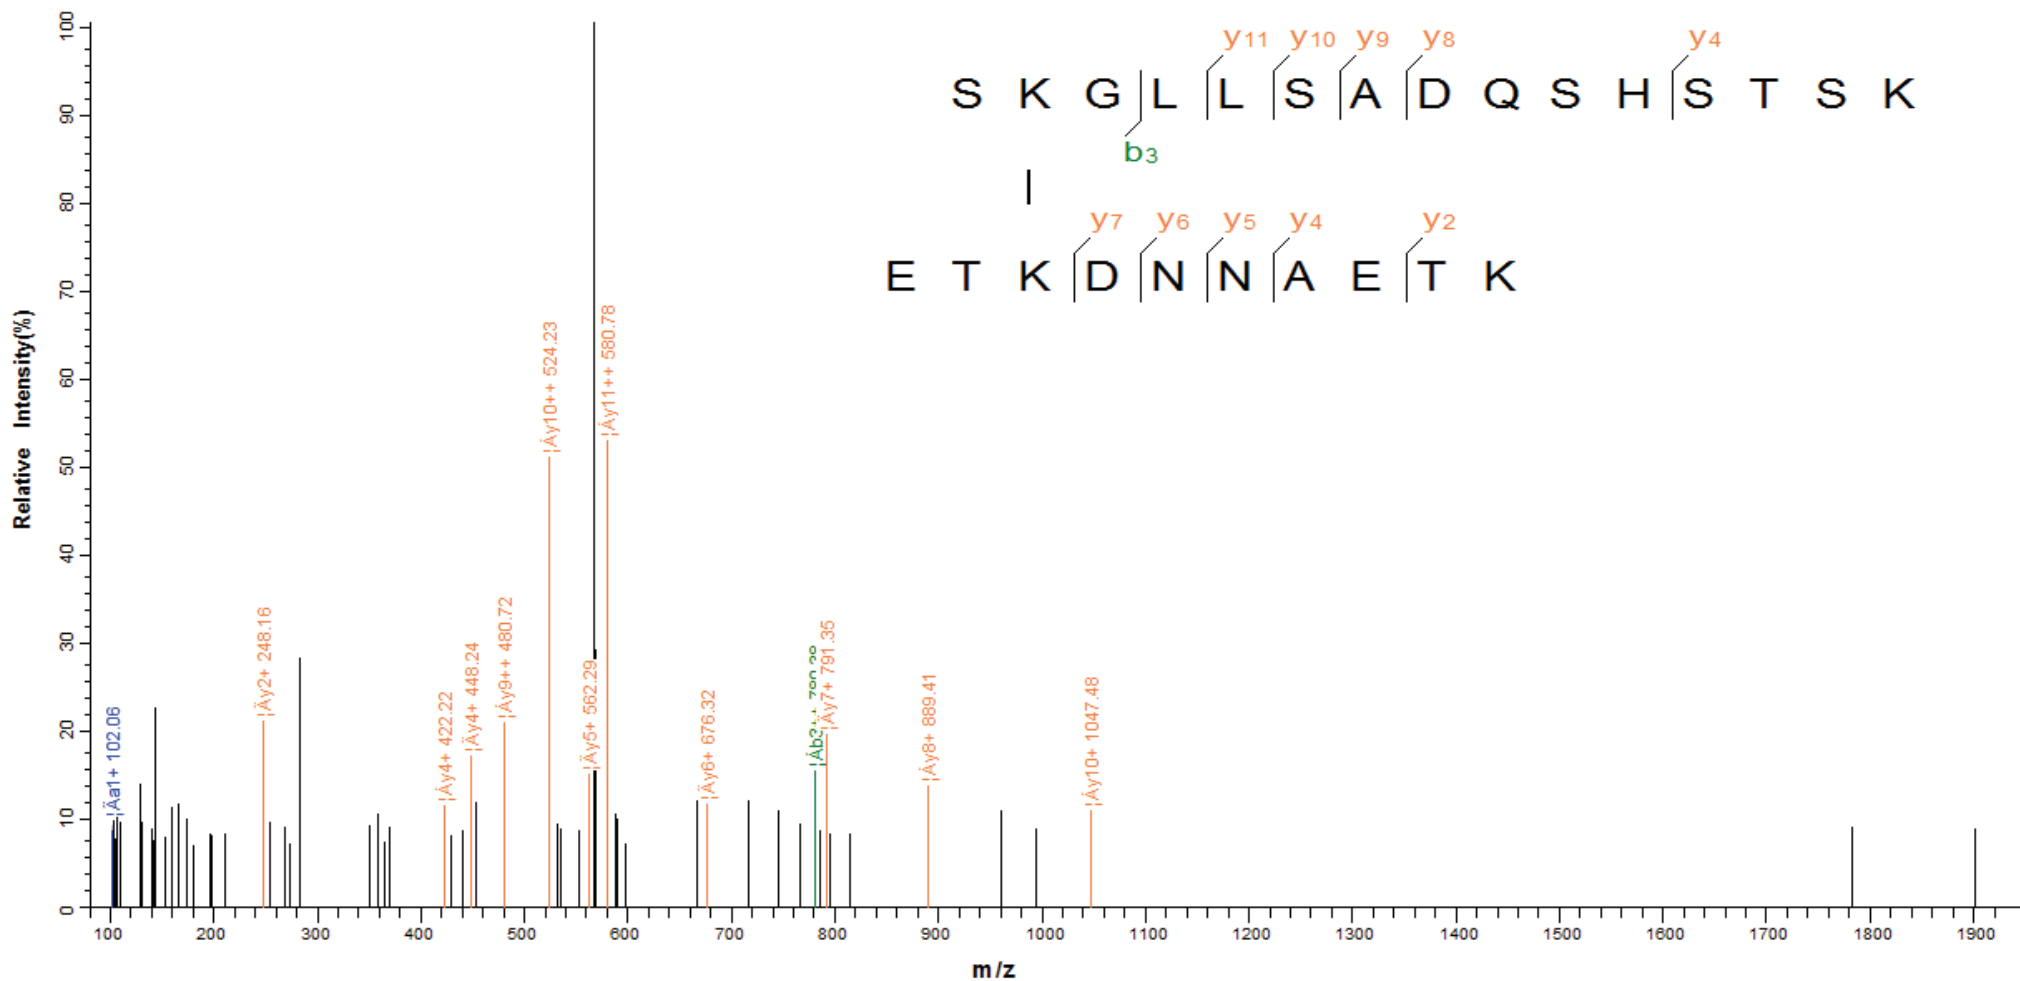

seq: GLLSADQSHSTSKSASLLER-IEKSK

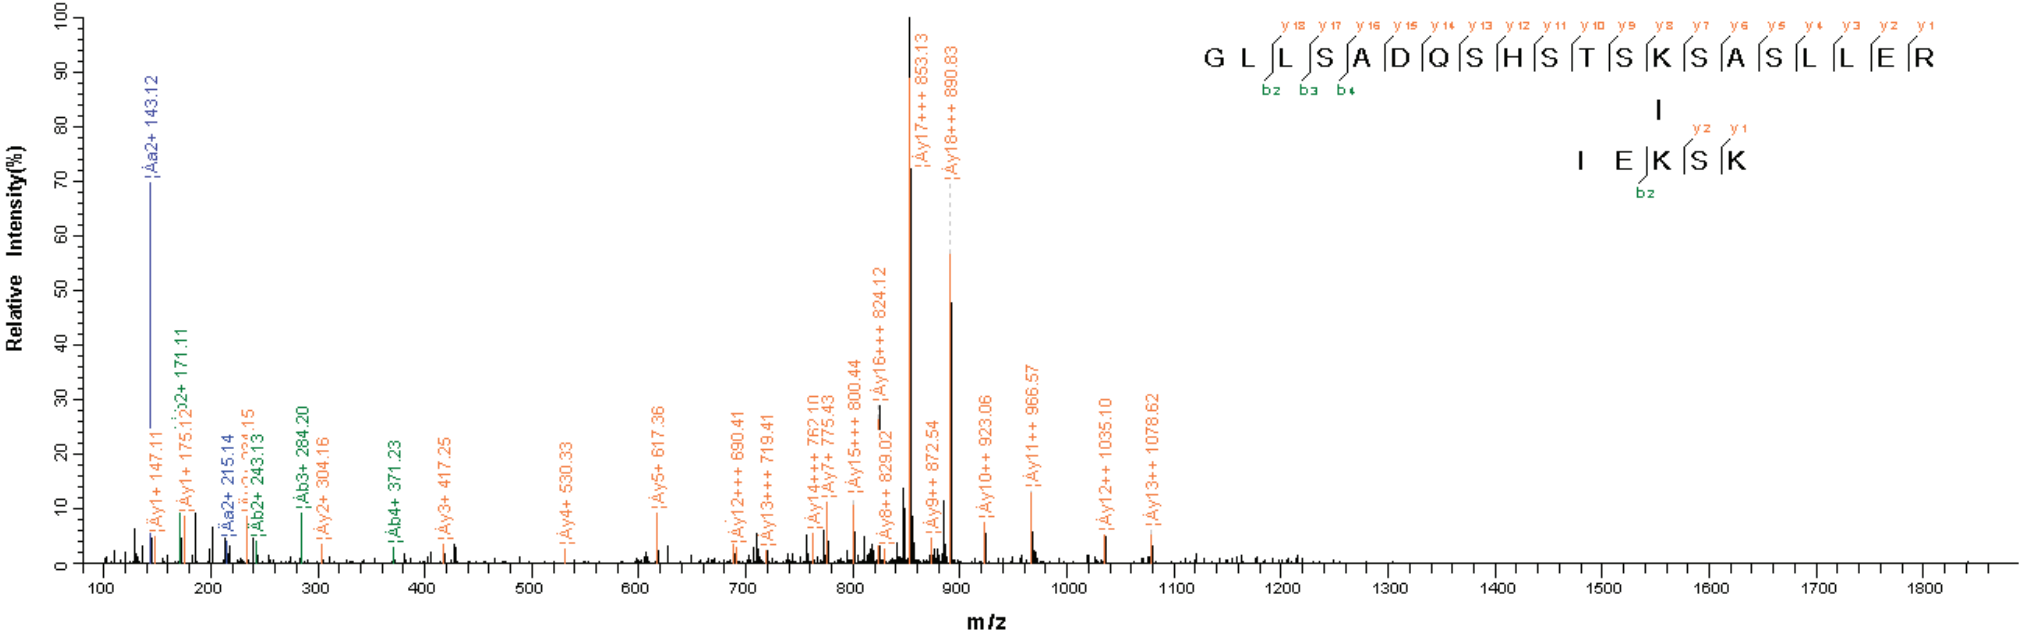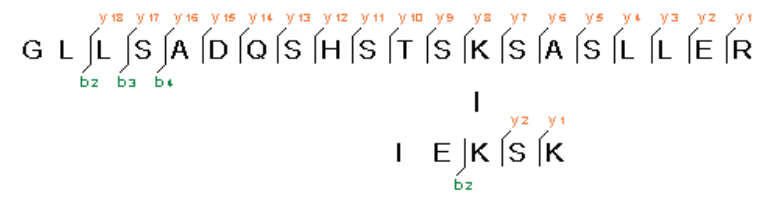



Seq: GLLSADQSHSTSKSASLLER-LHKNR

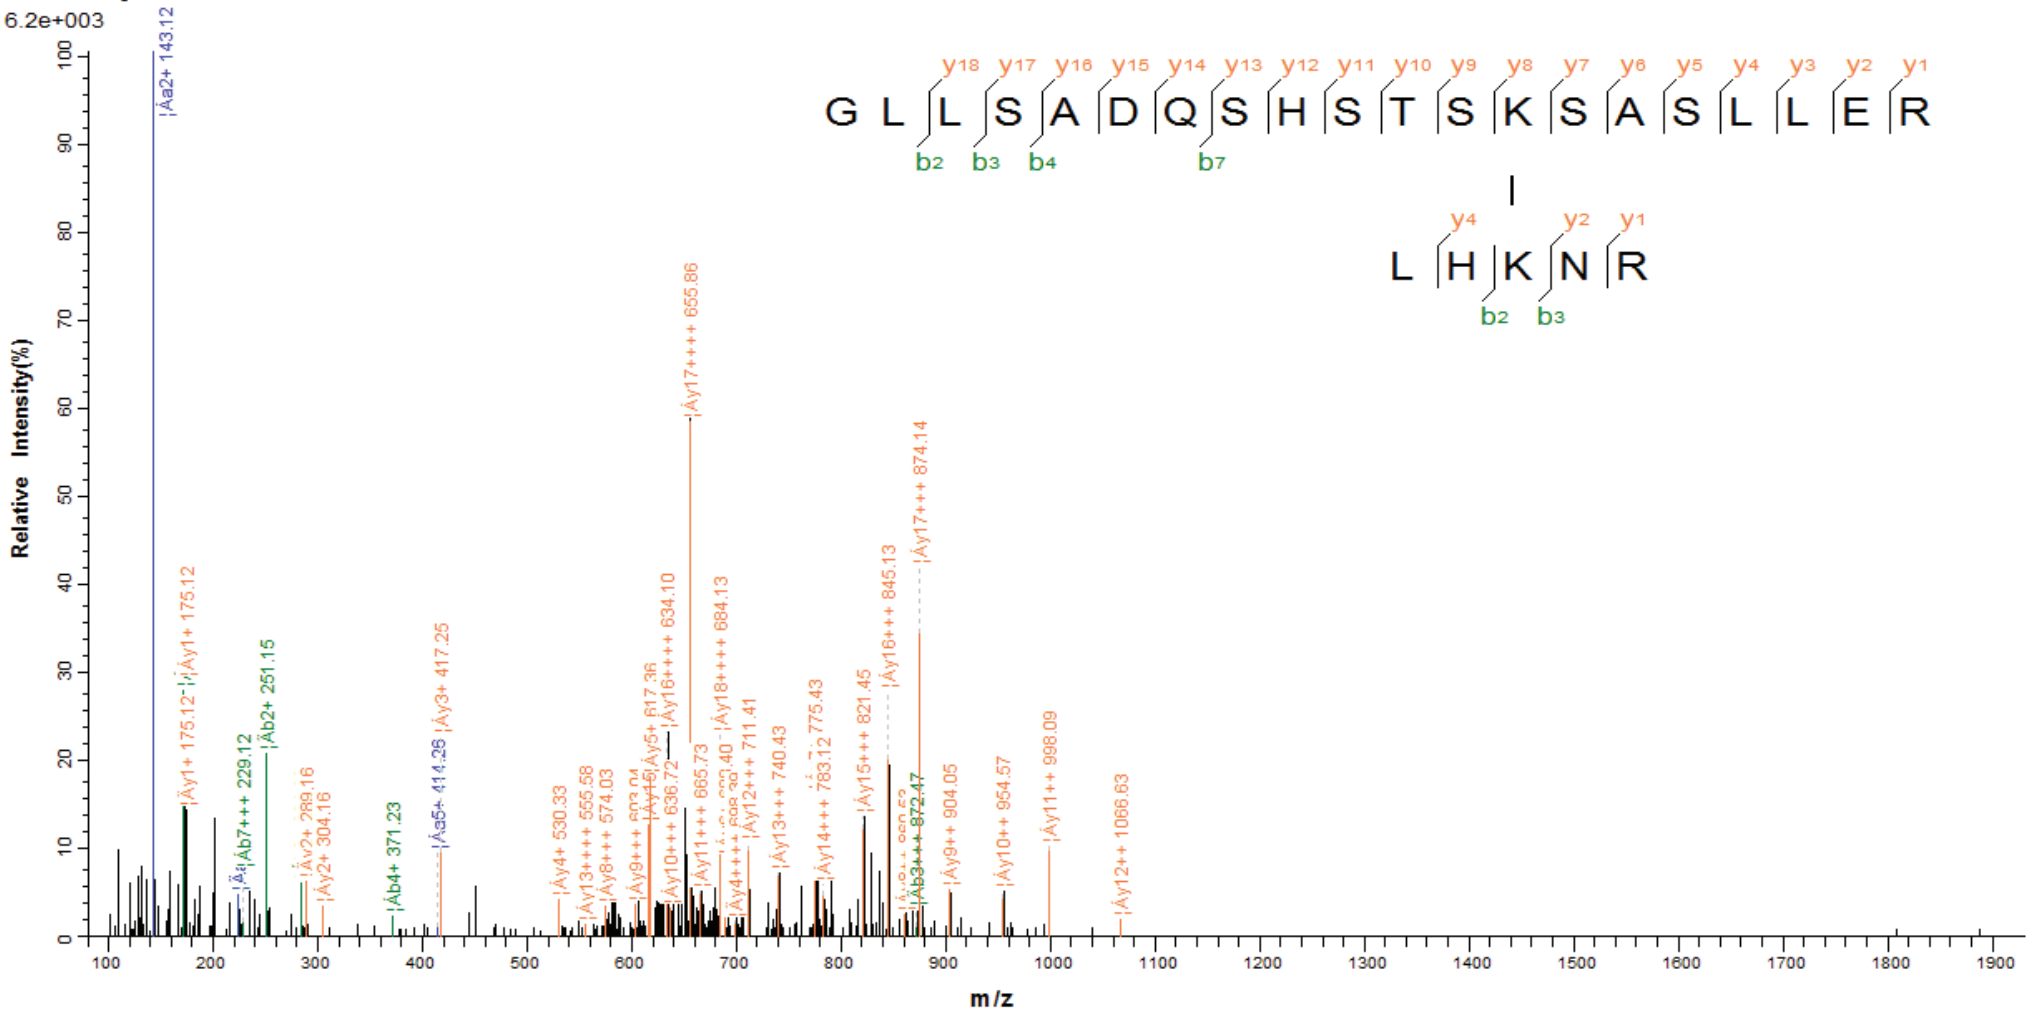

3.7e+003 seq: GLLSADQSHSTSKSASLLER-ETKDNNAETK

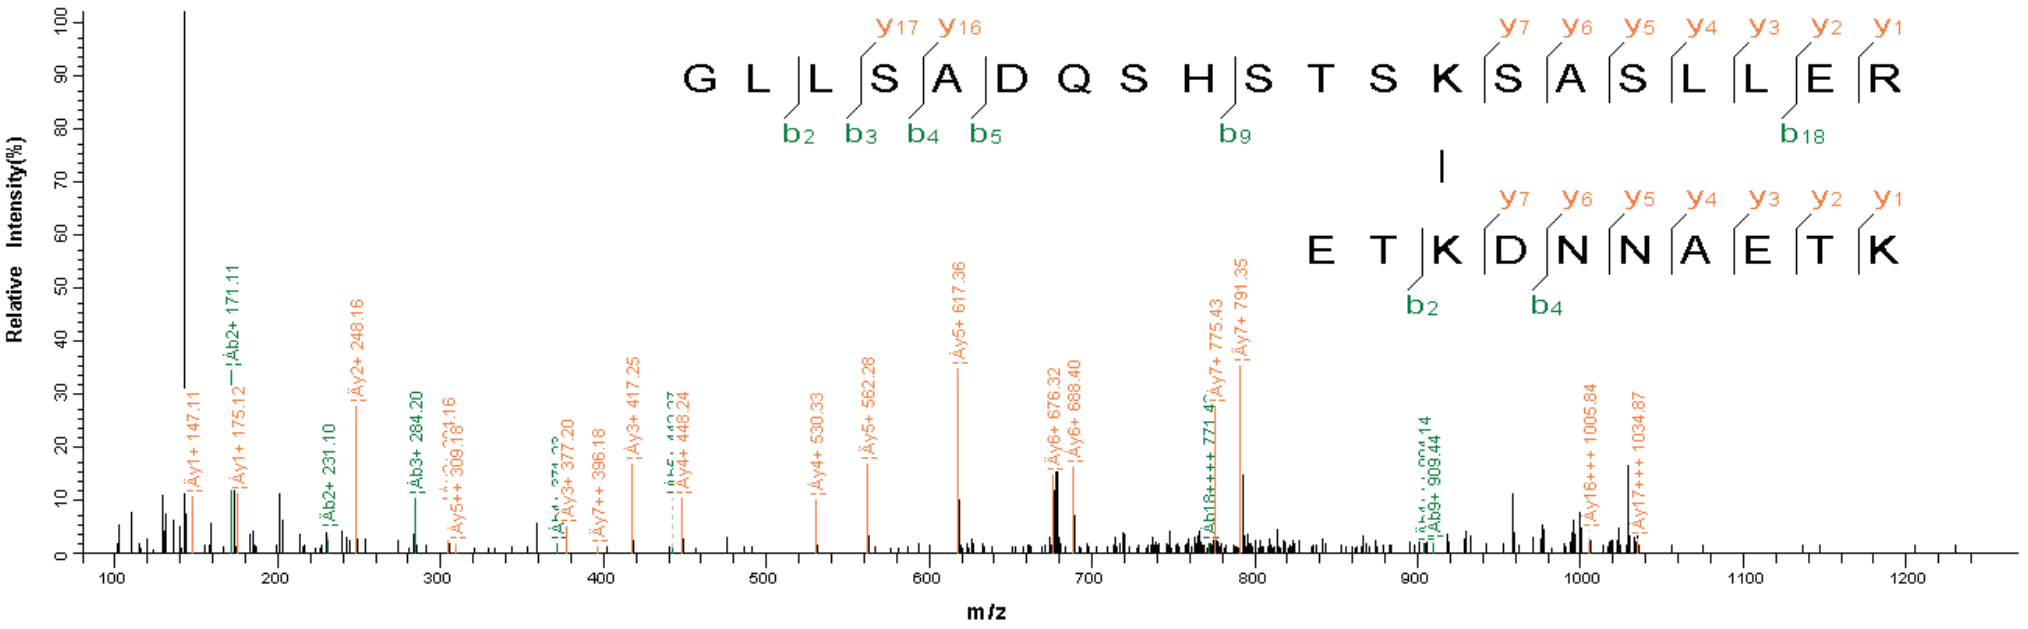

Seq: GLLSADQSHSTSKSASLLER-DNNAETKR

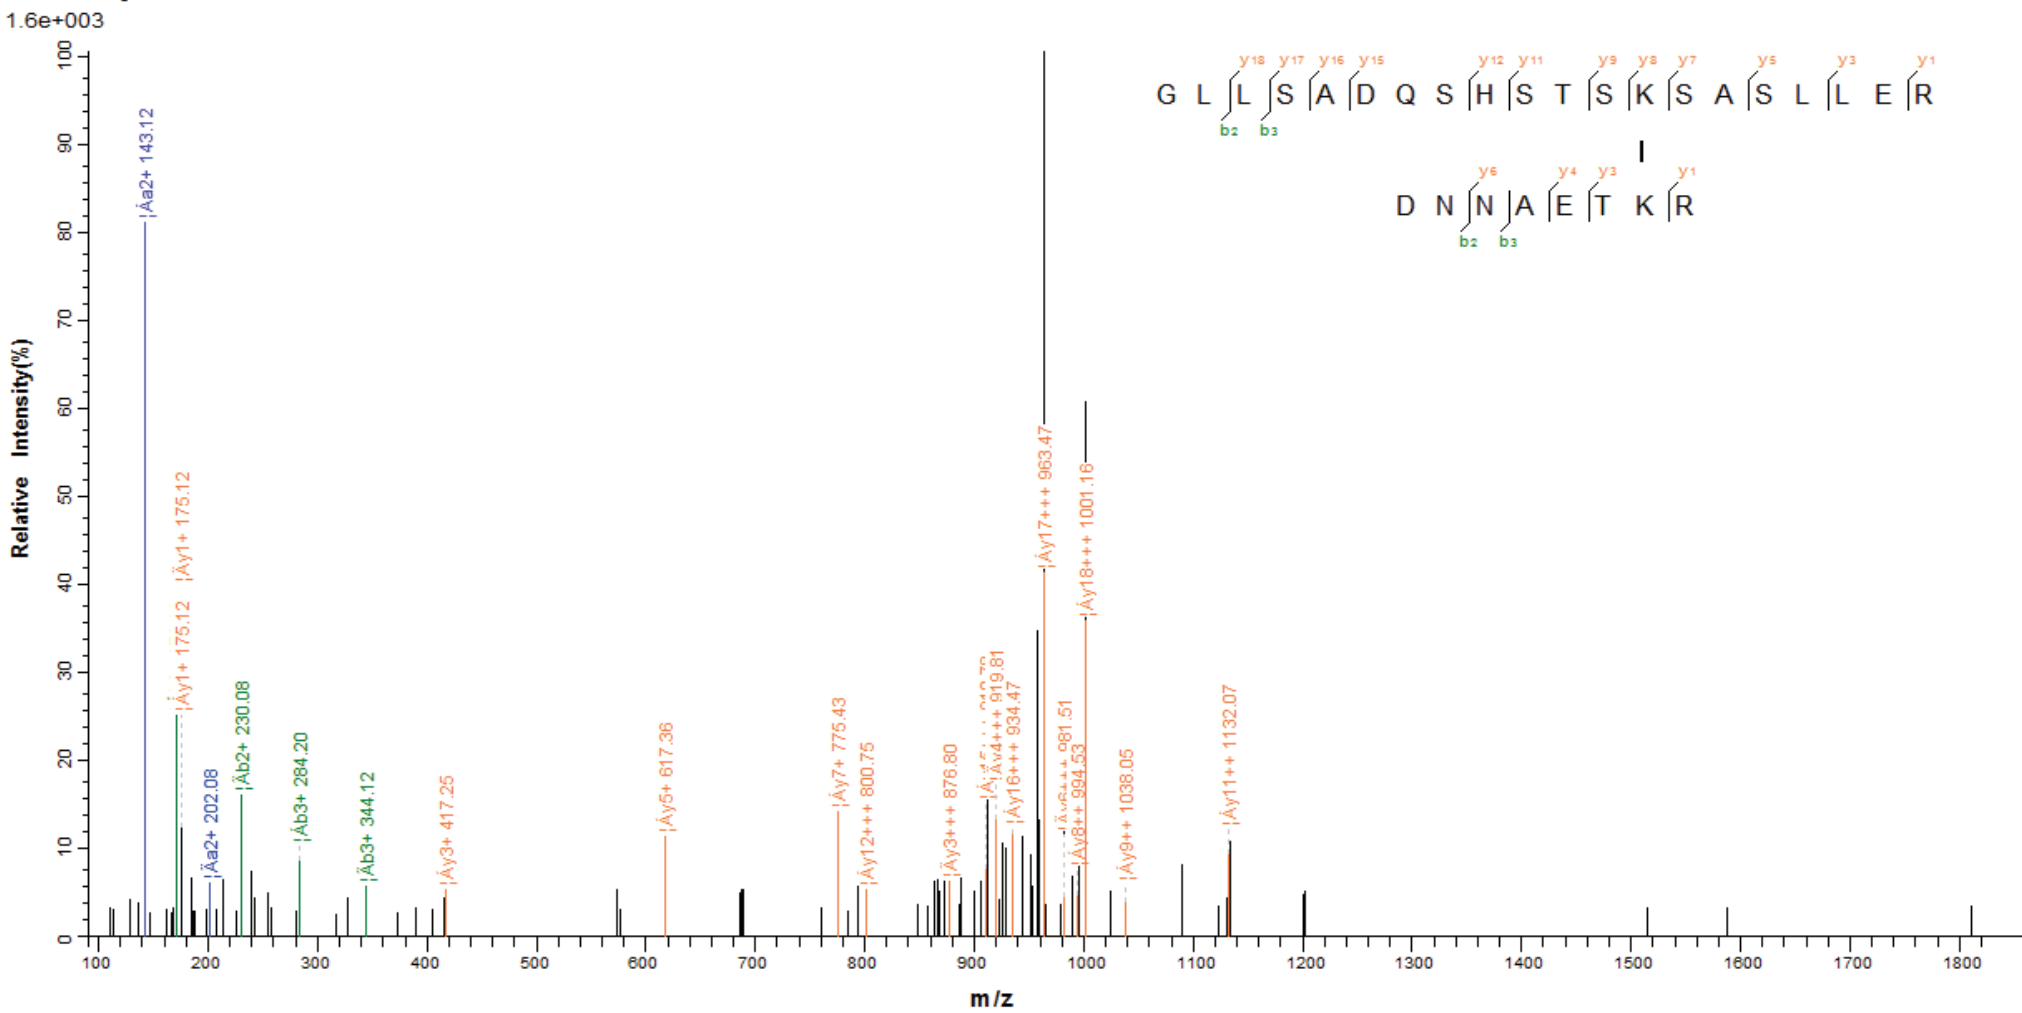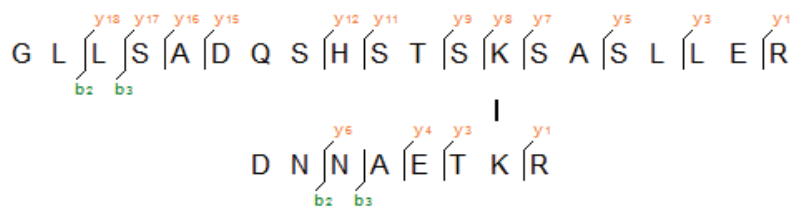

Seq: KSSNLDPSSNSFK-VILDNTKTER

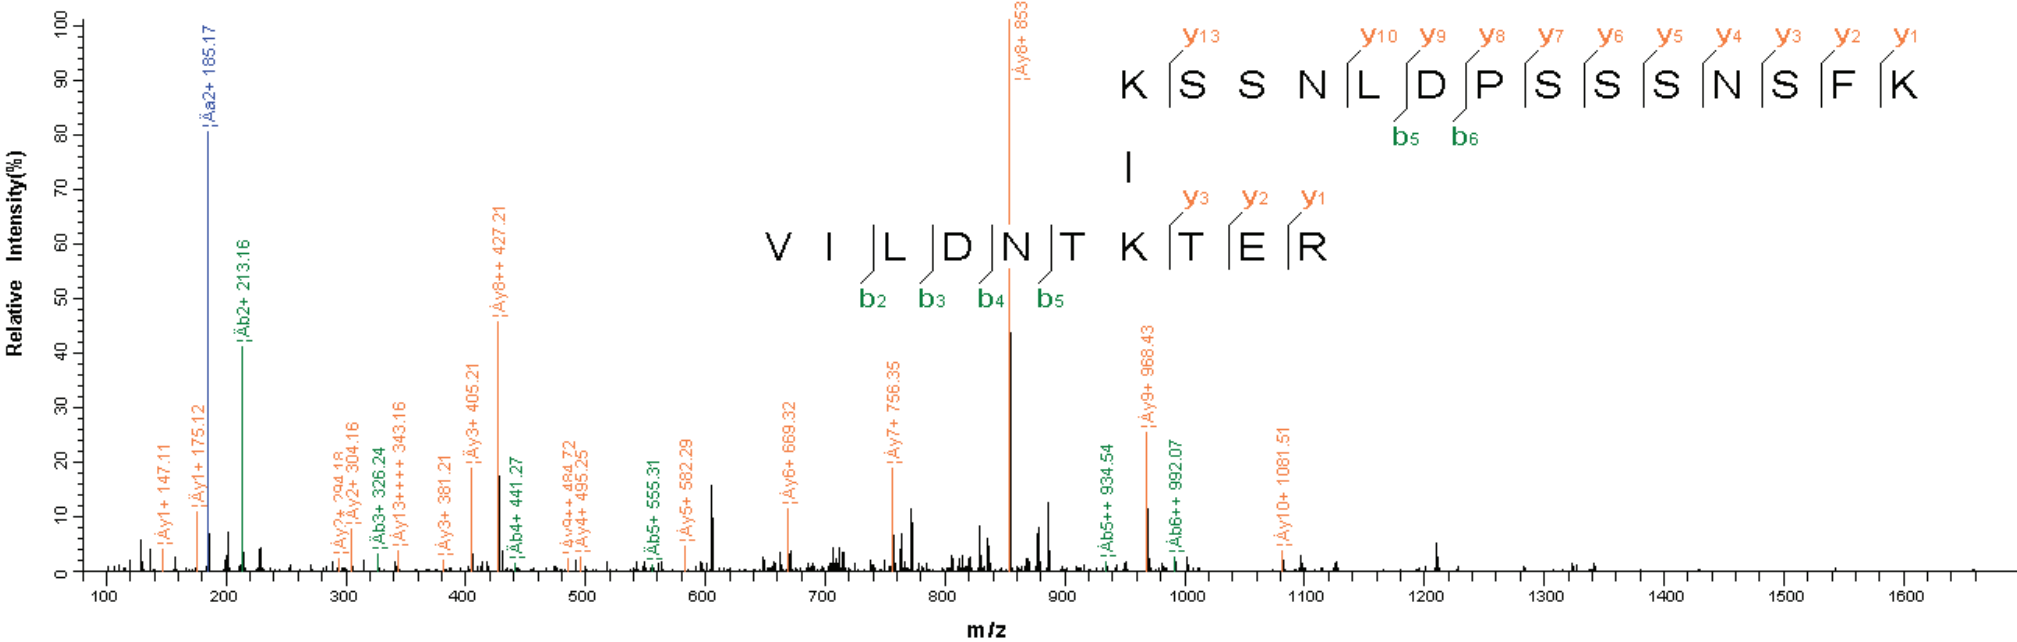

Seq: KSSNLDPSSSNSFK-NSKQILETNTK

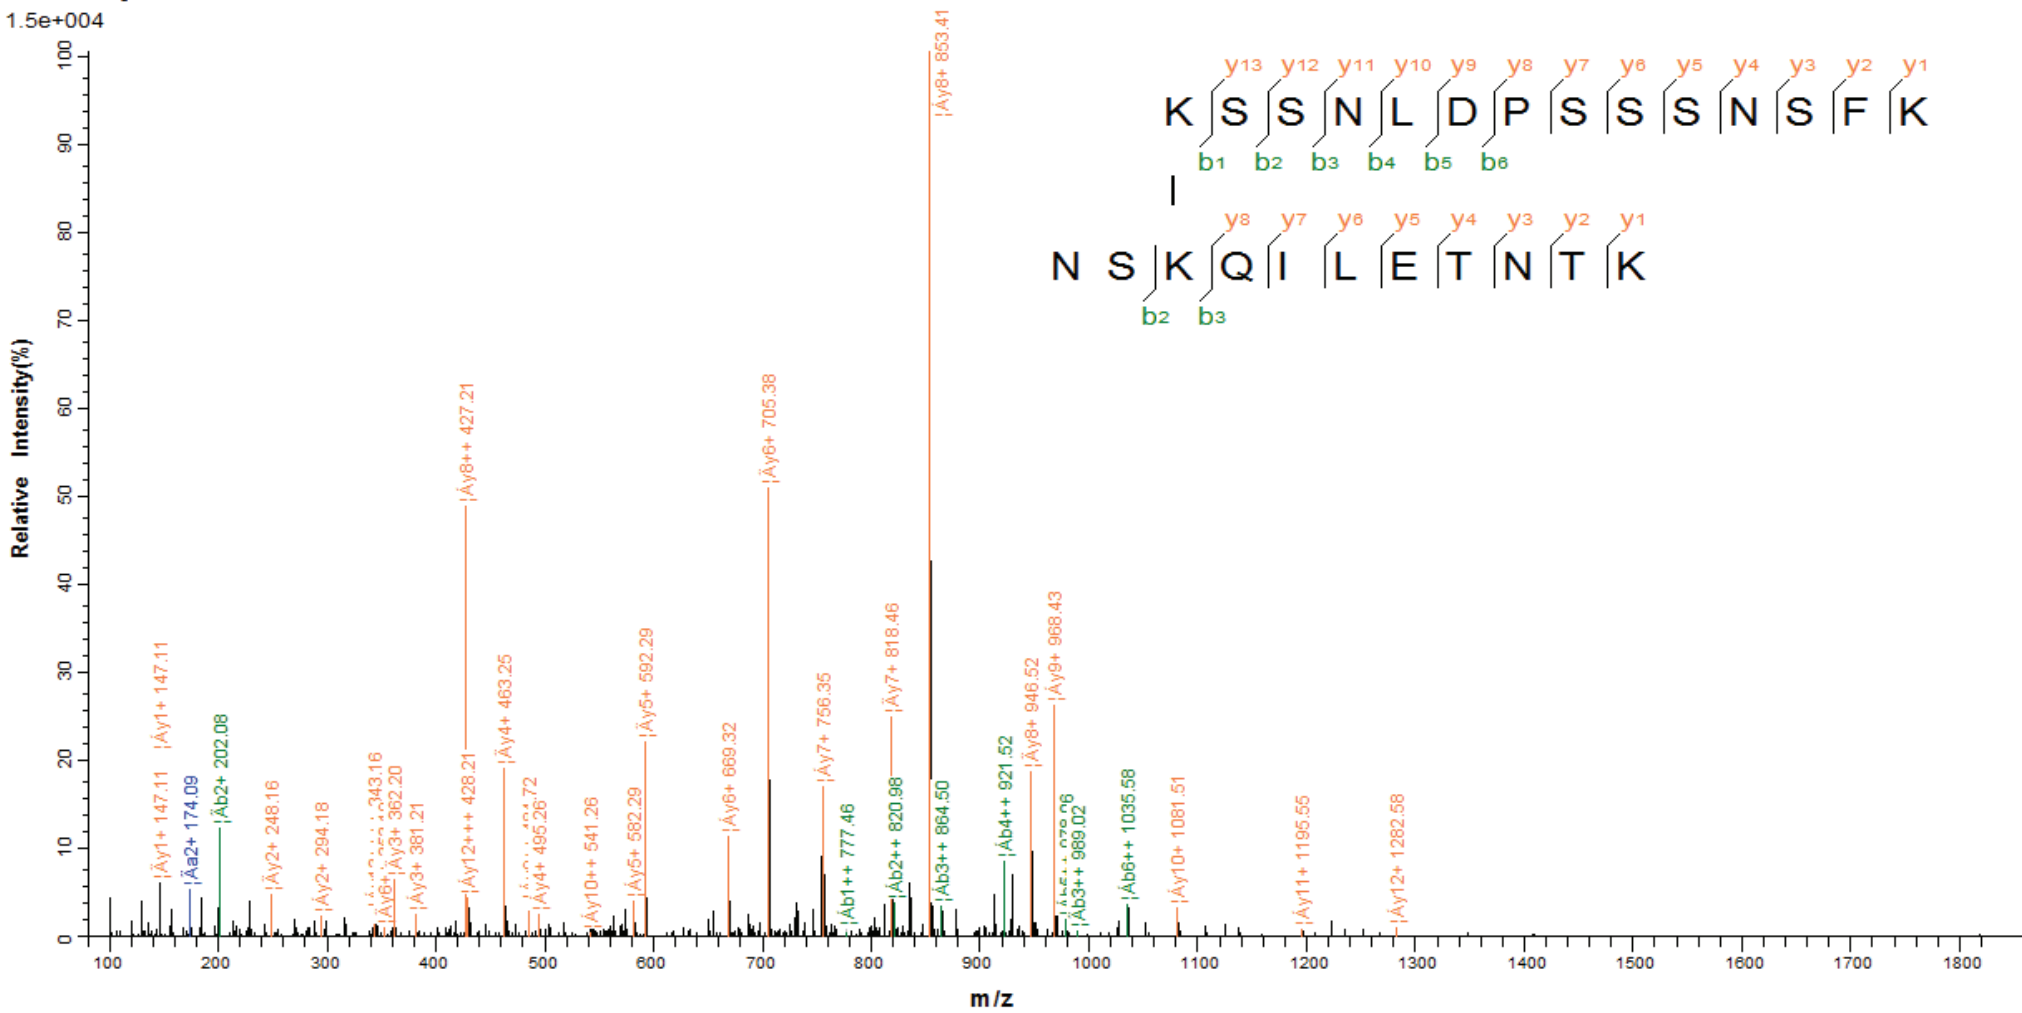

exosome\_A9\_140503145423.2392.2392.4.dta Seq: VILDNTKTER-ELQKK

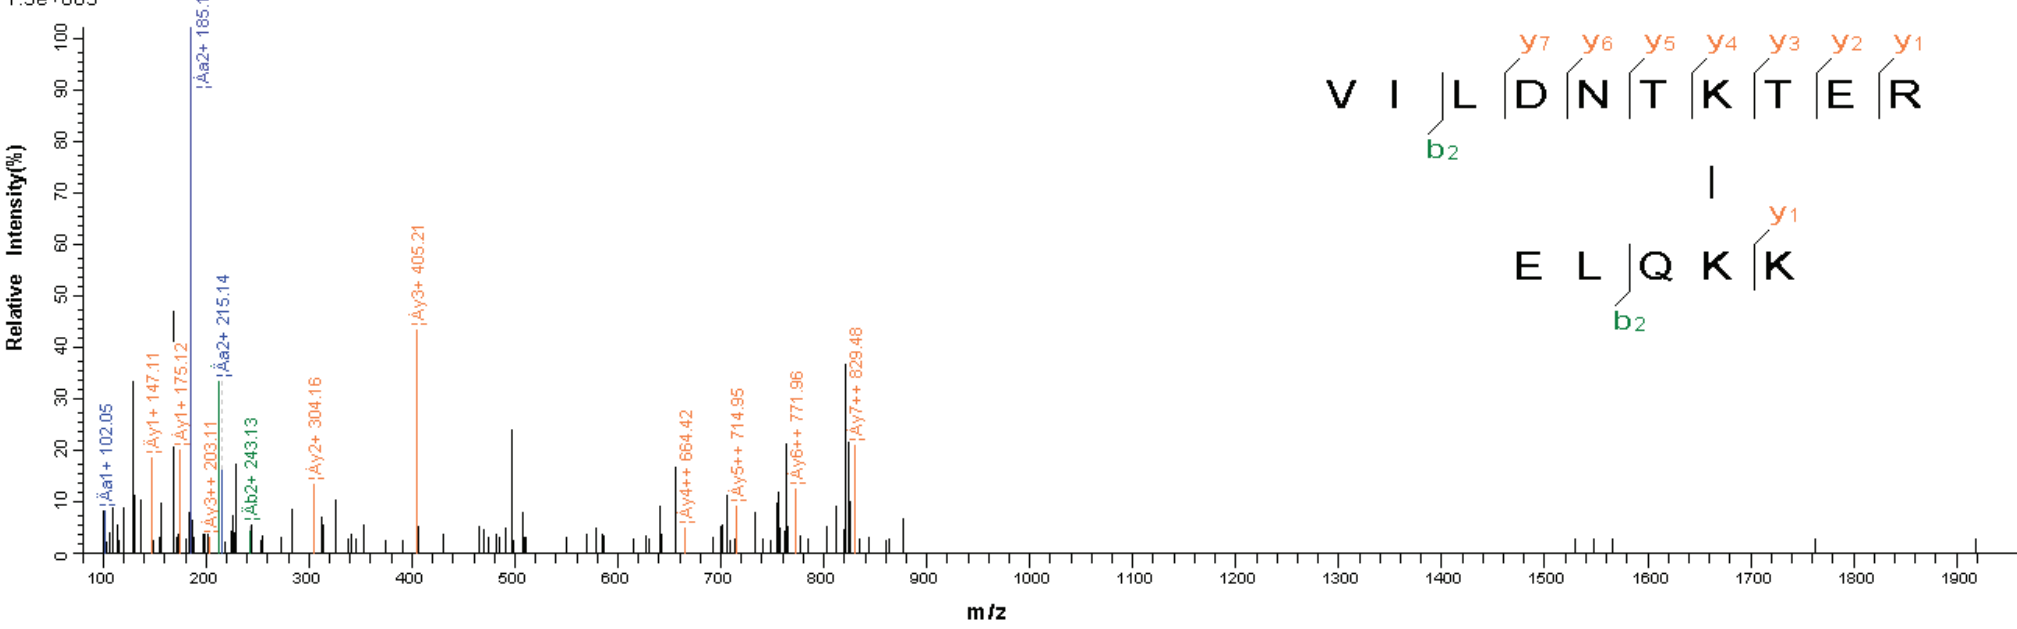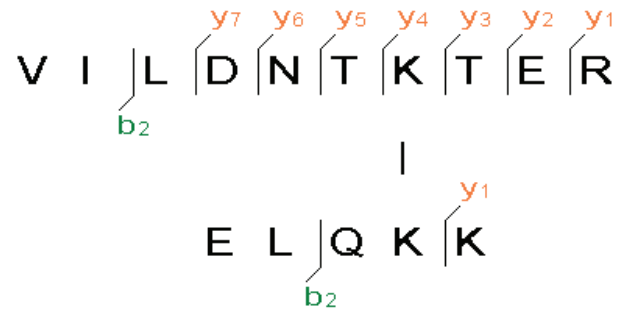

Seq: VILDNTKTER-KGDIIHSR

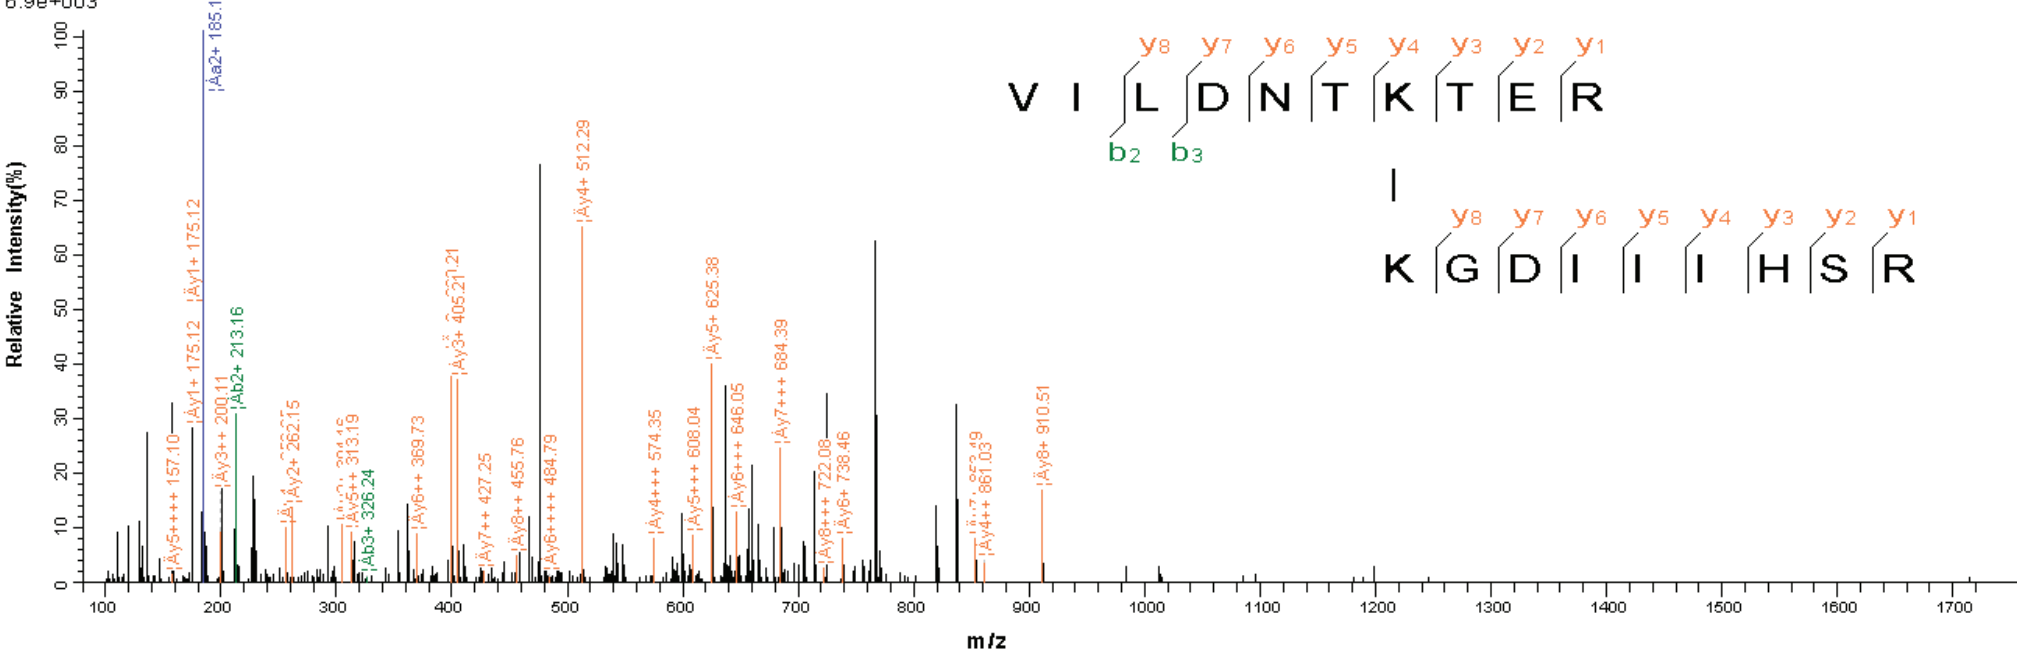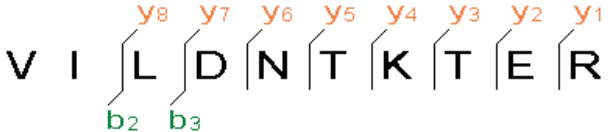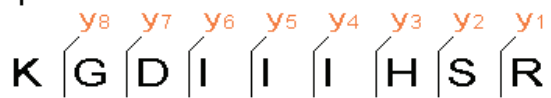

Seq: TERENGFNSMFKK

3.3e+003

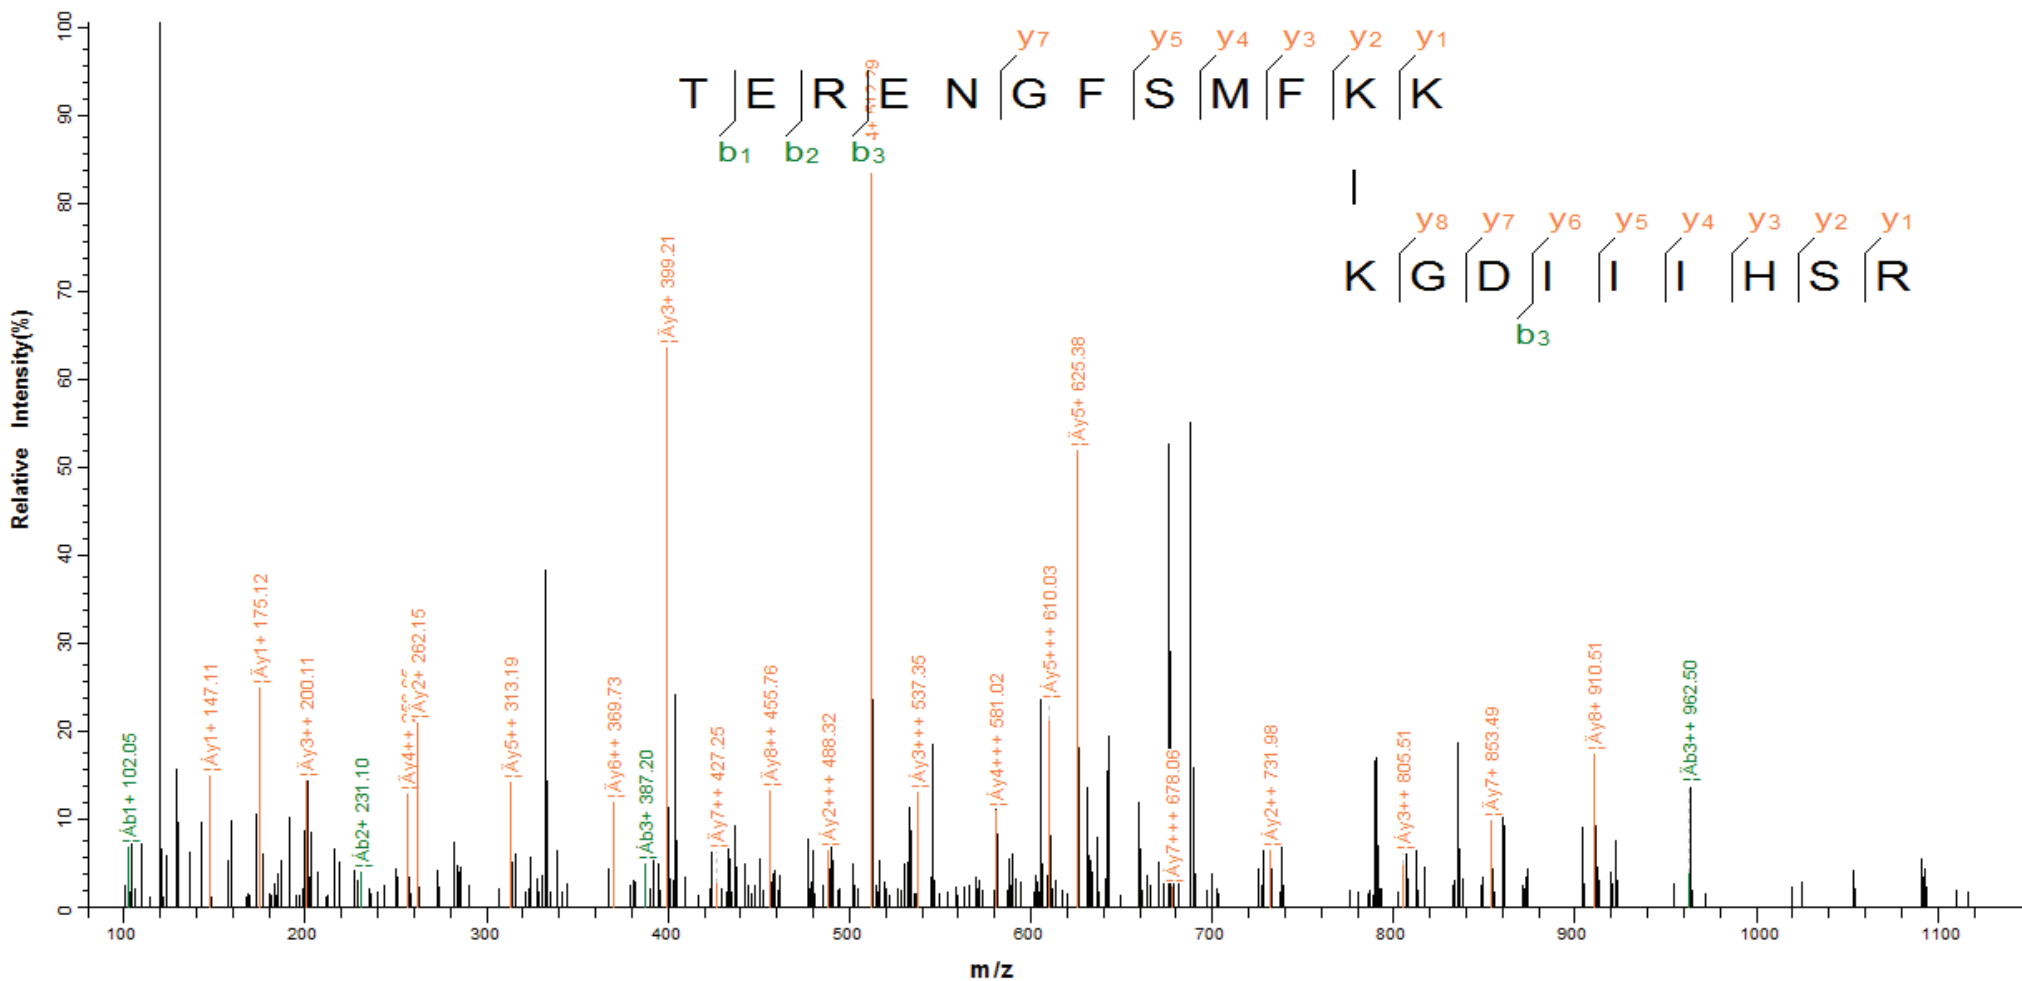







Seq: DNNAETKR-LHKNR

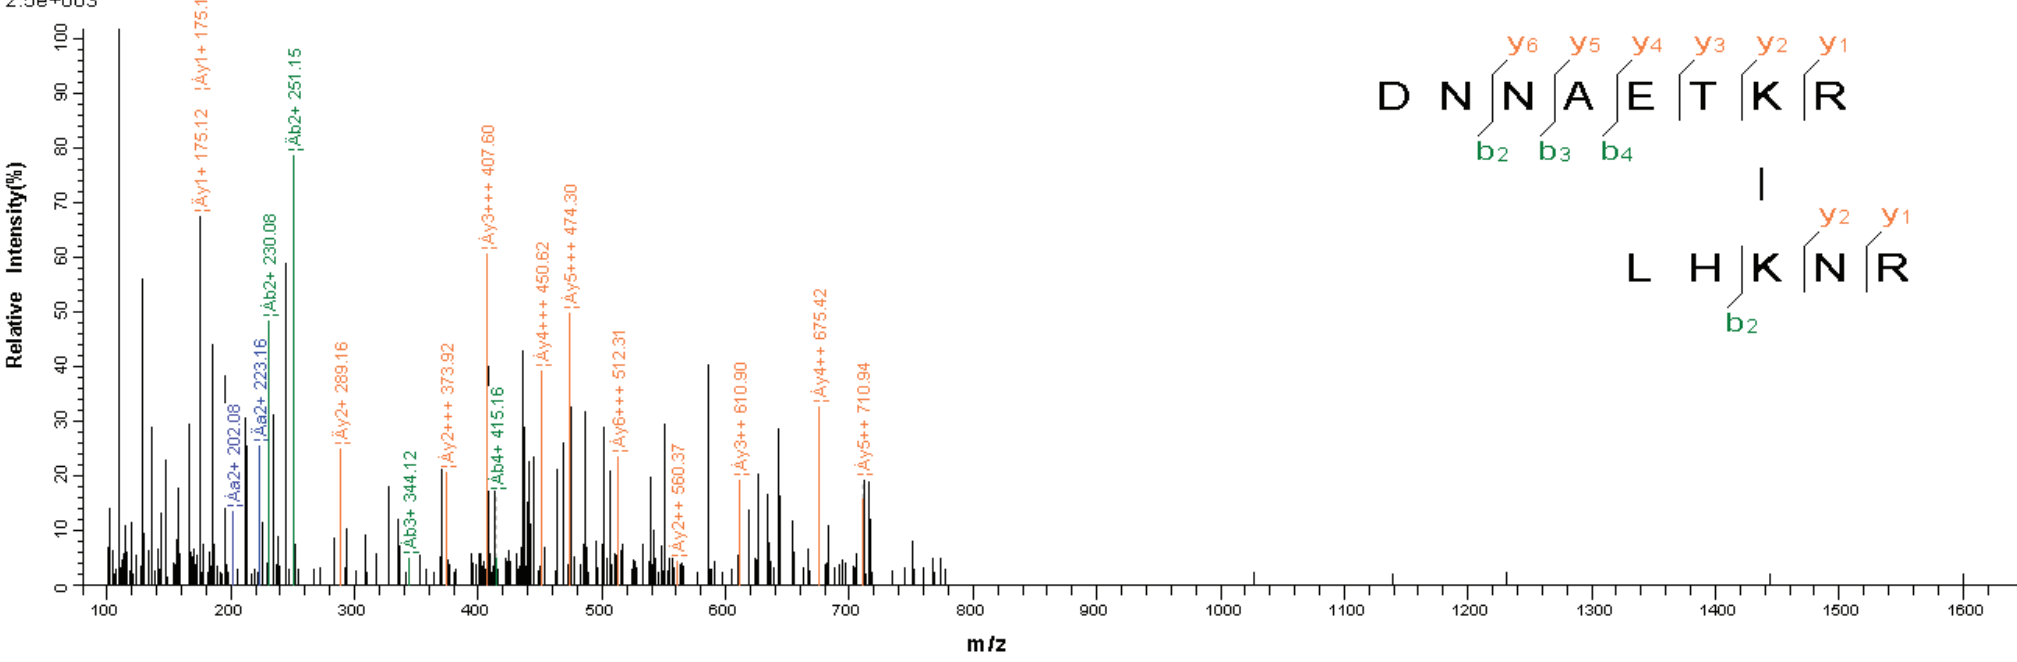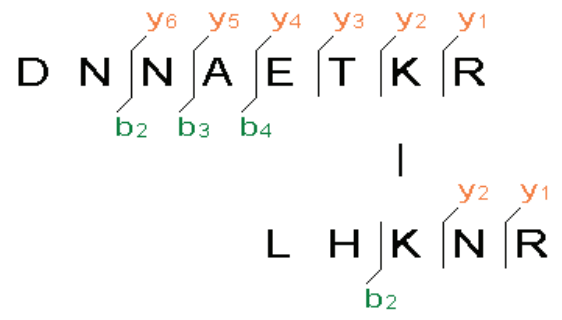

Seq: DNNAETKR-DLKTLLAK

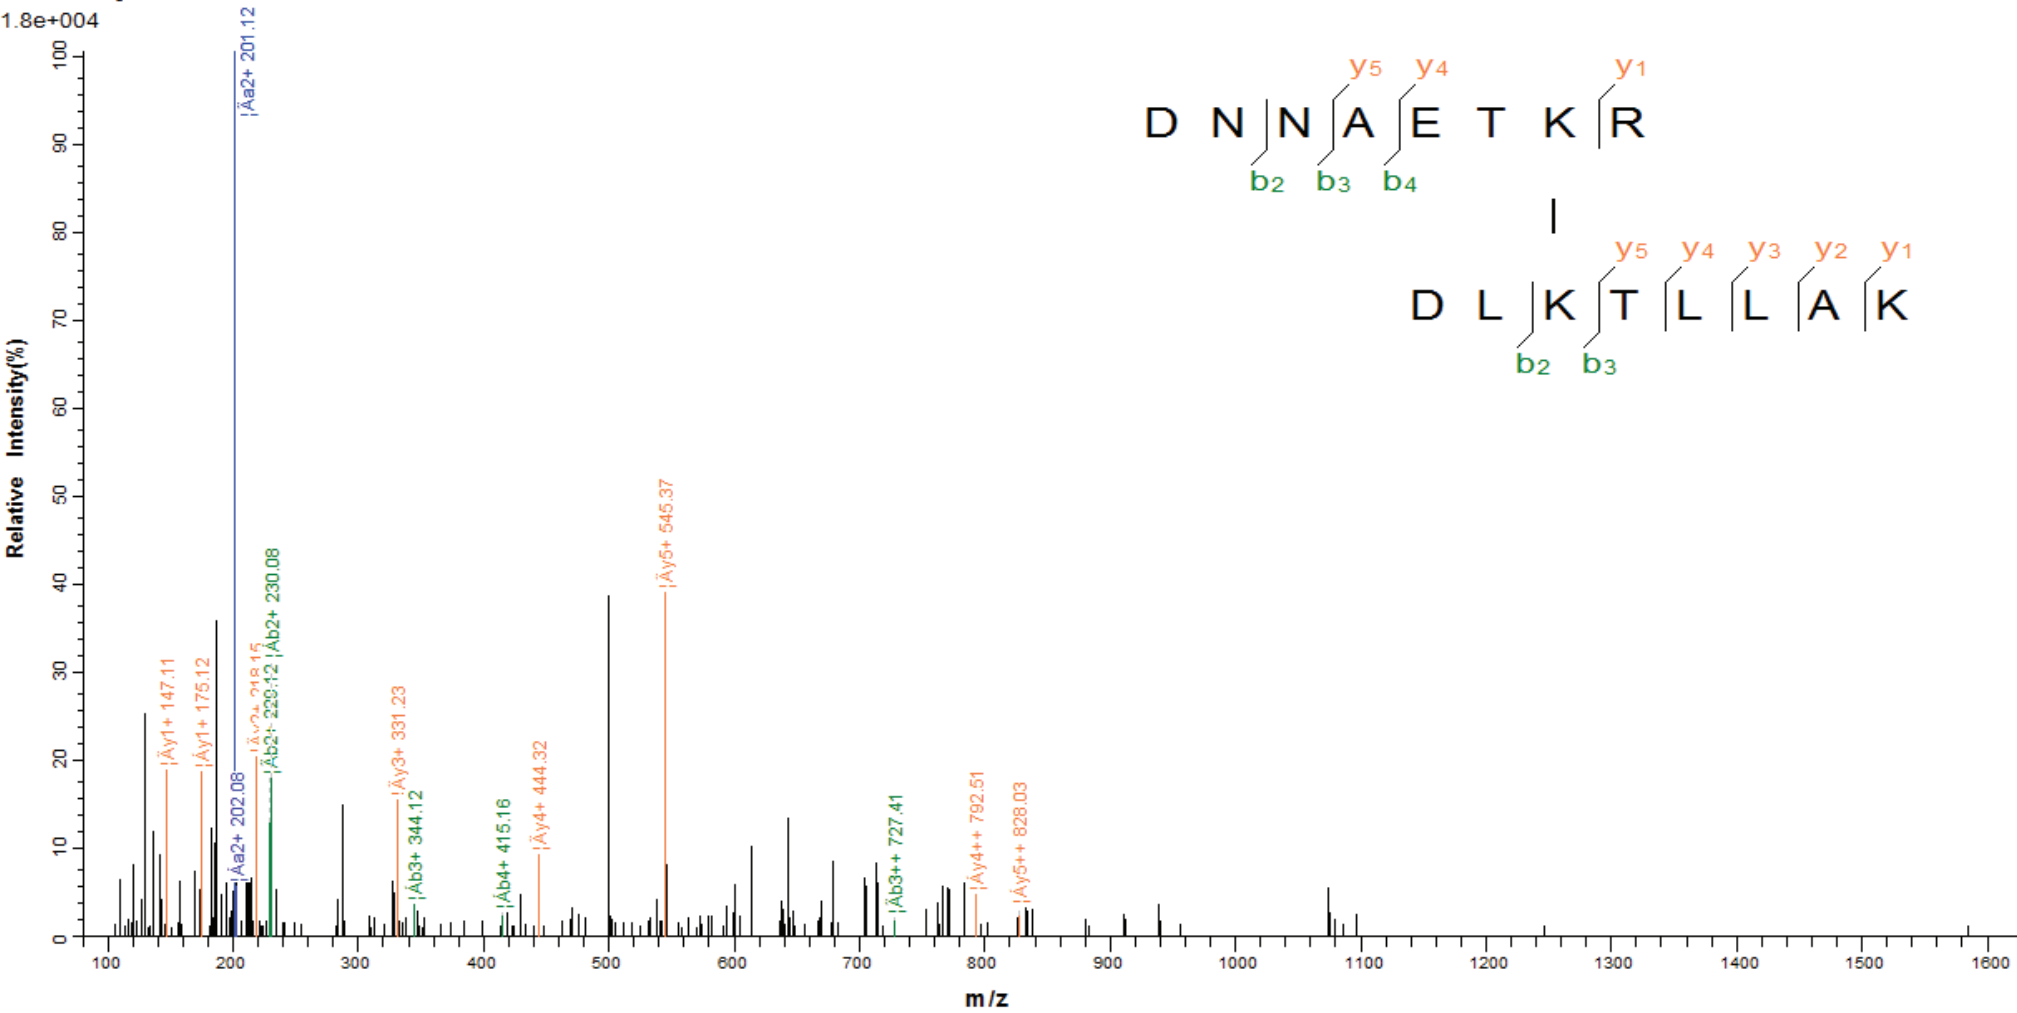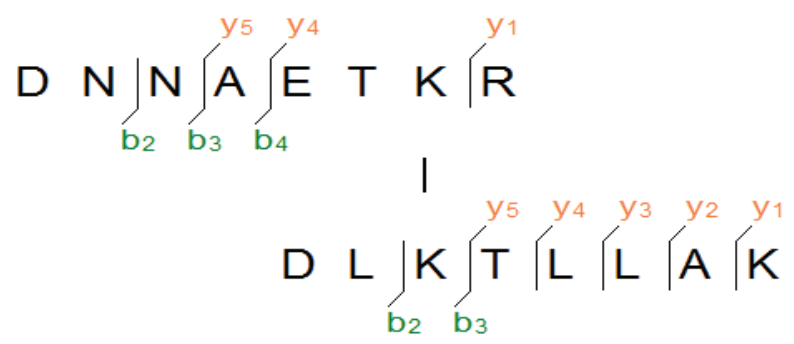

exosome\_A9 140503145423.2027.2027.4.dta Seq: DNNAETKR-TLLAKDK

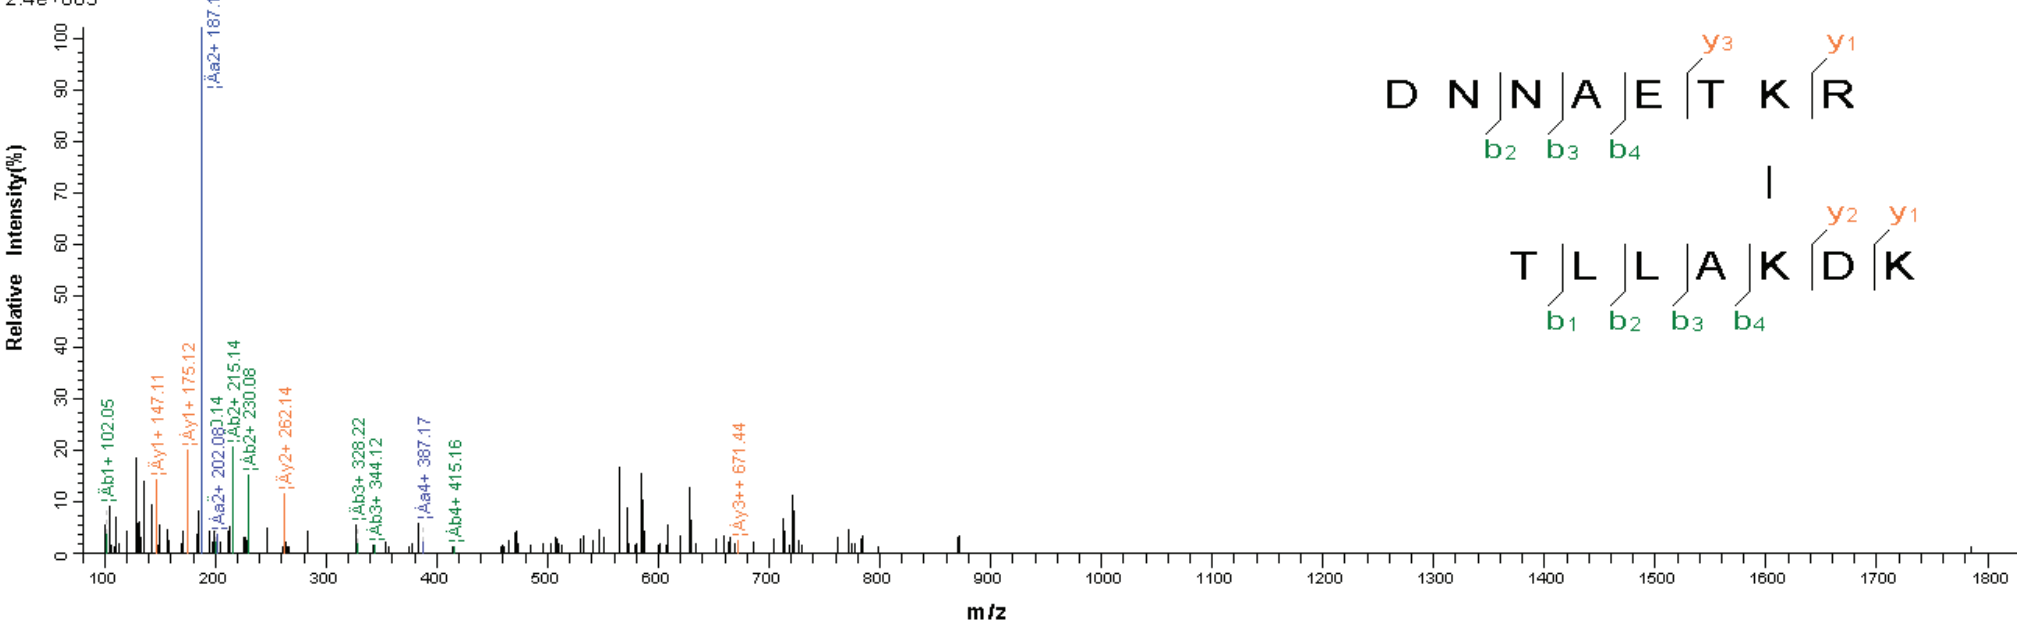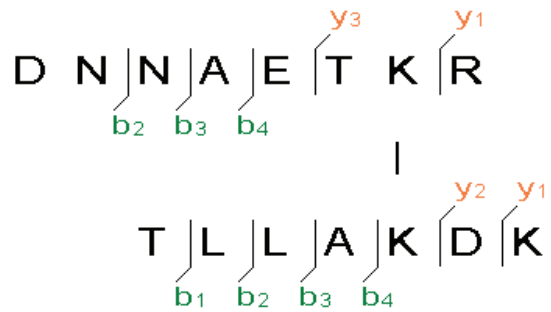

Seq: NSKQILETNTK-VILDNTKTER

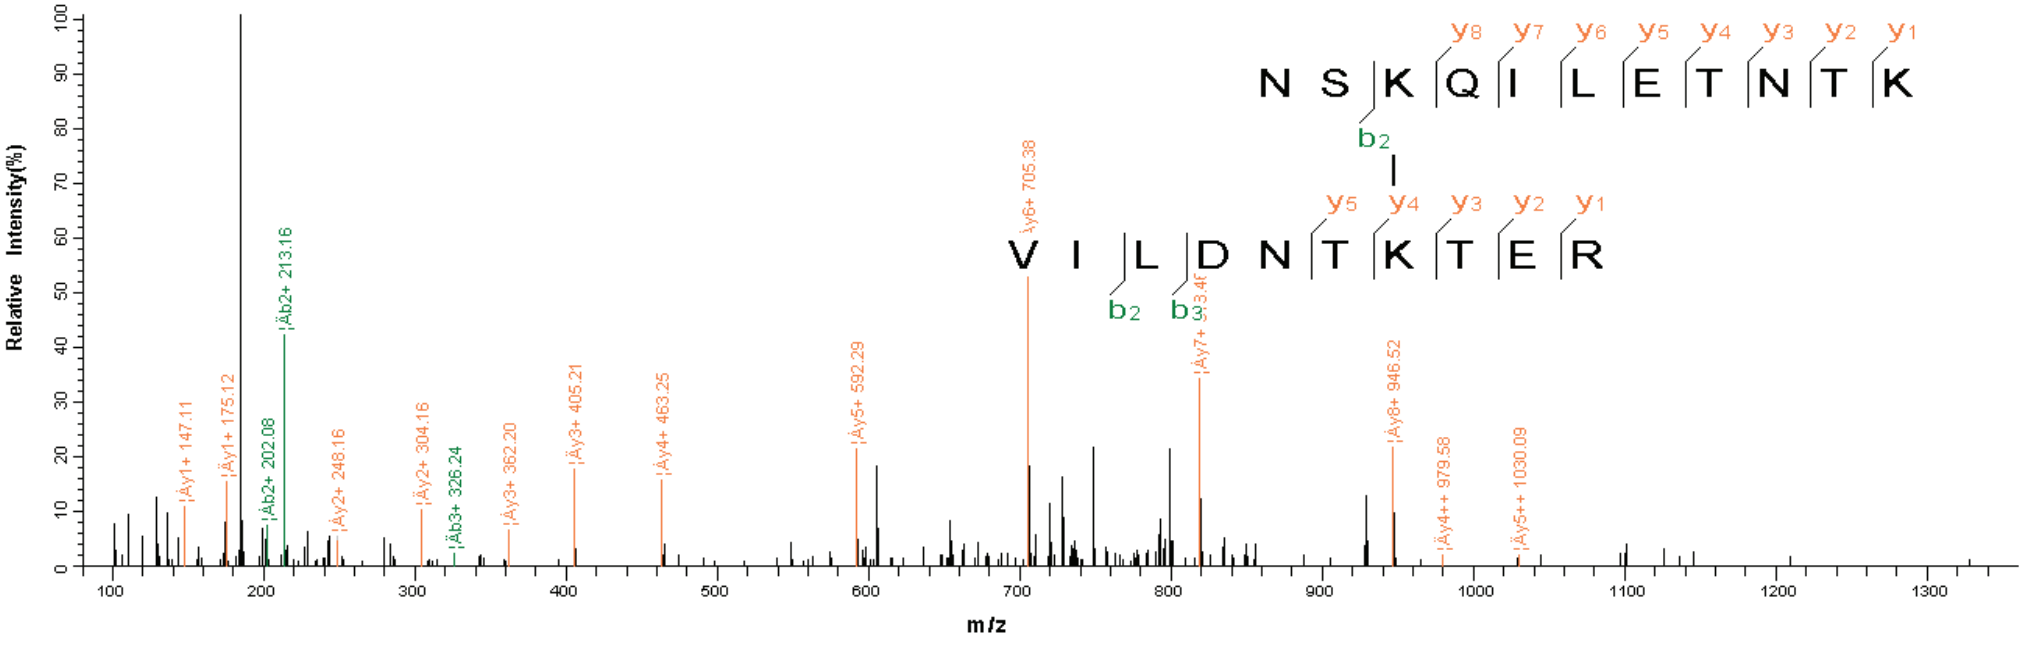

Seq: NSKQLLETNTK-KGDIIHSR

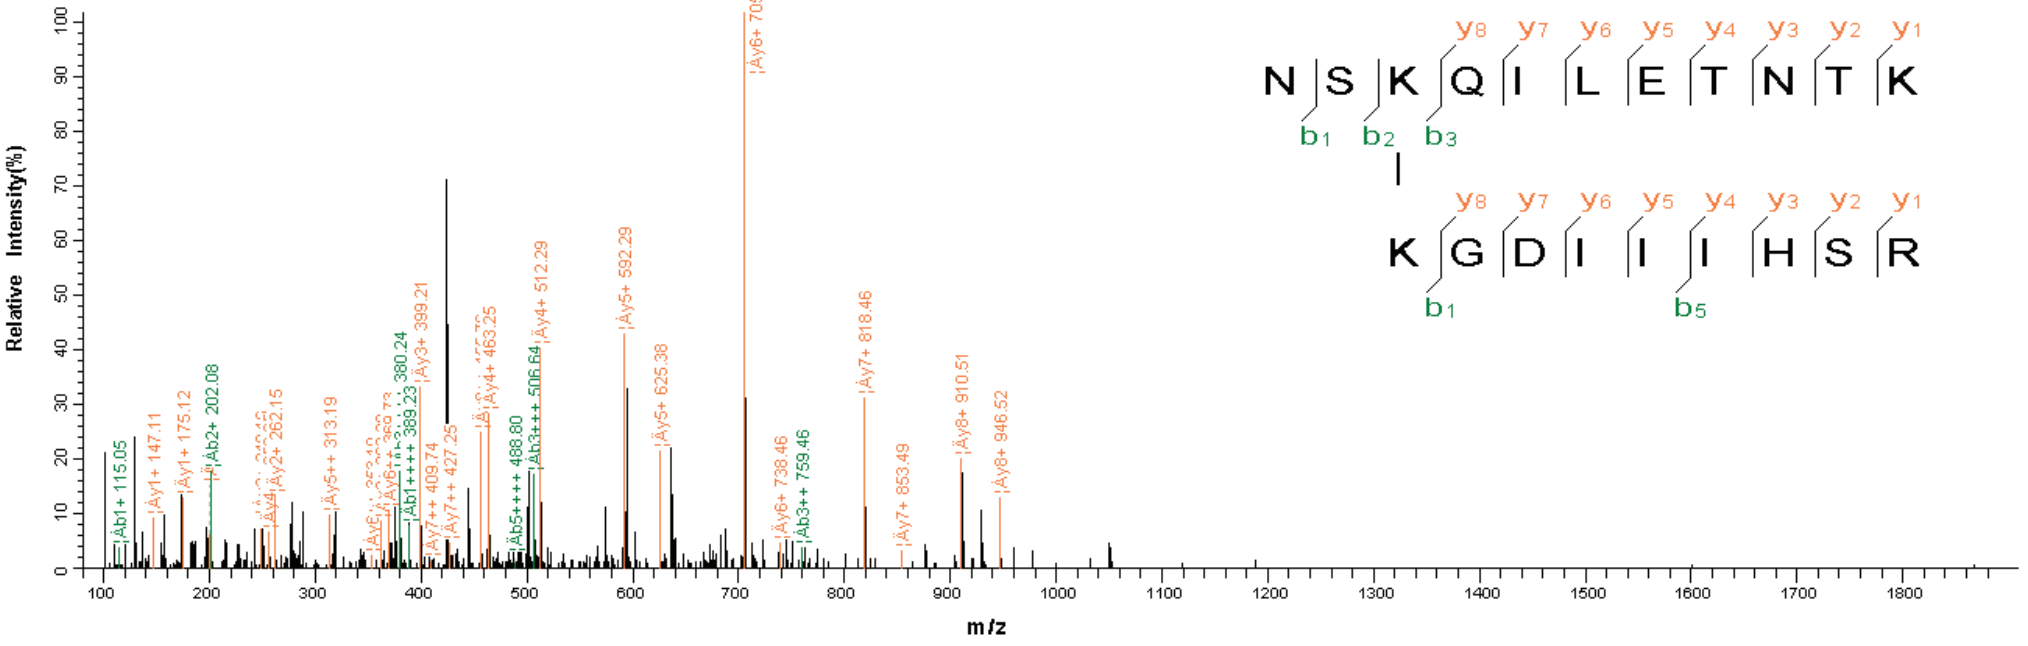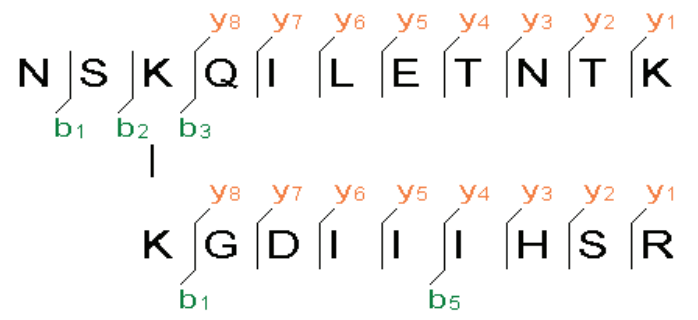

Seq: TLLAKDK-LHKNR

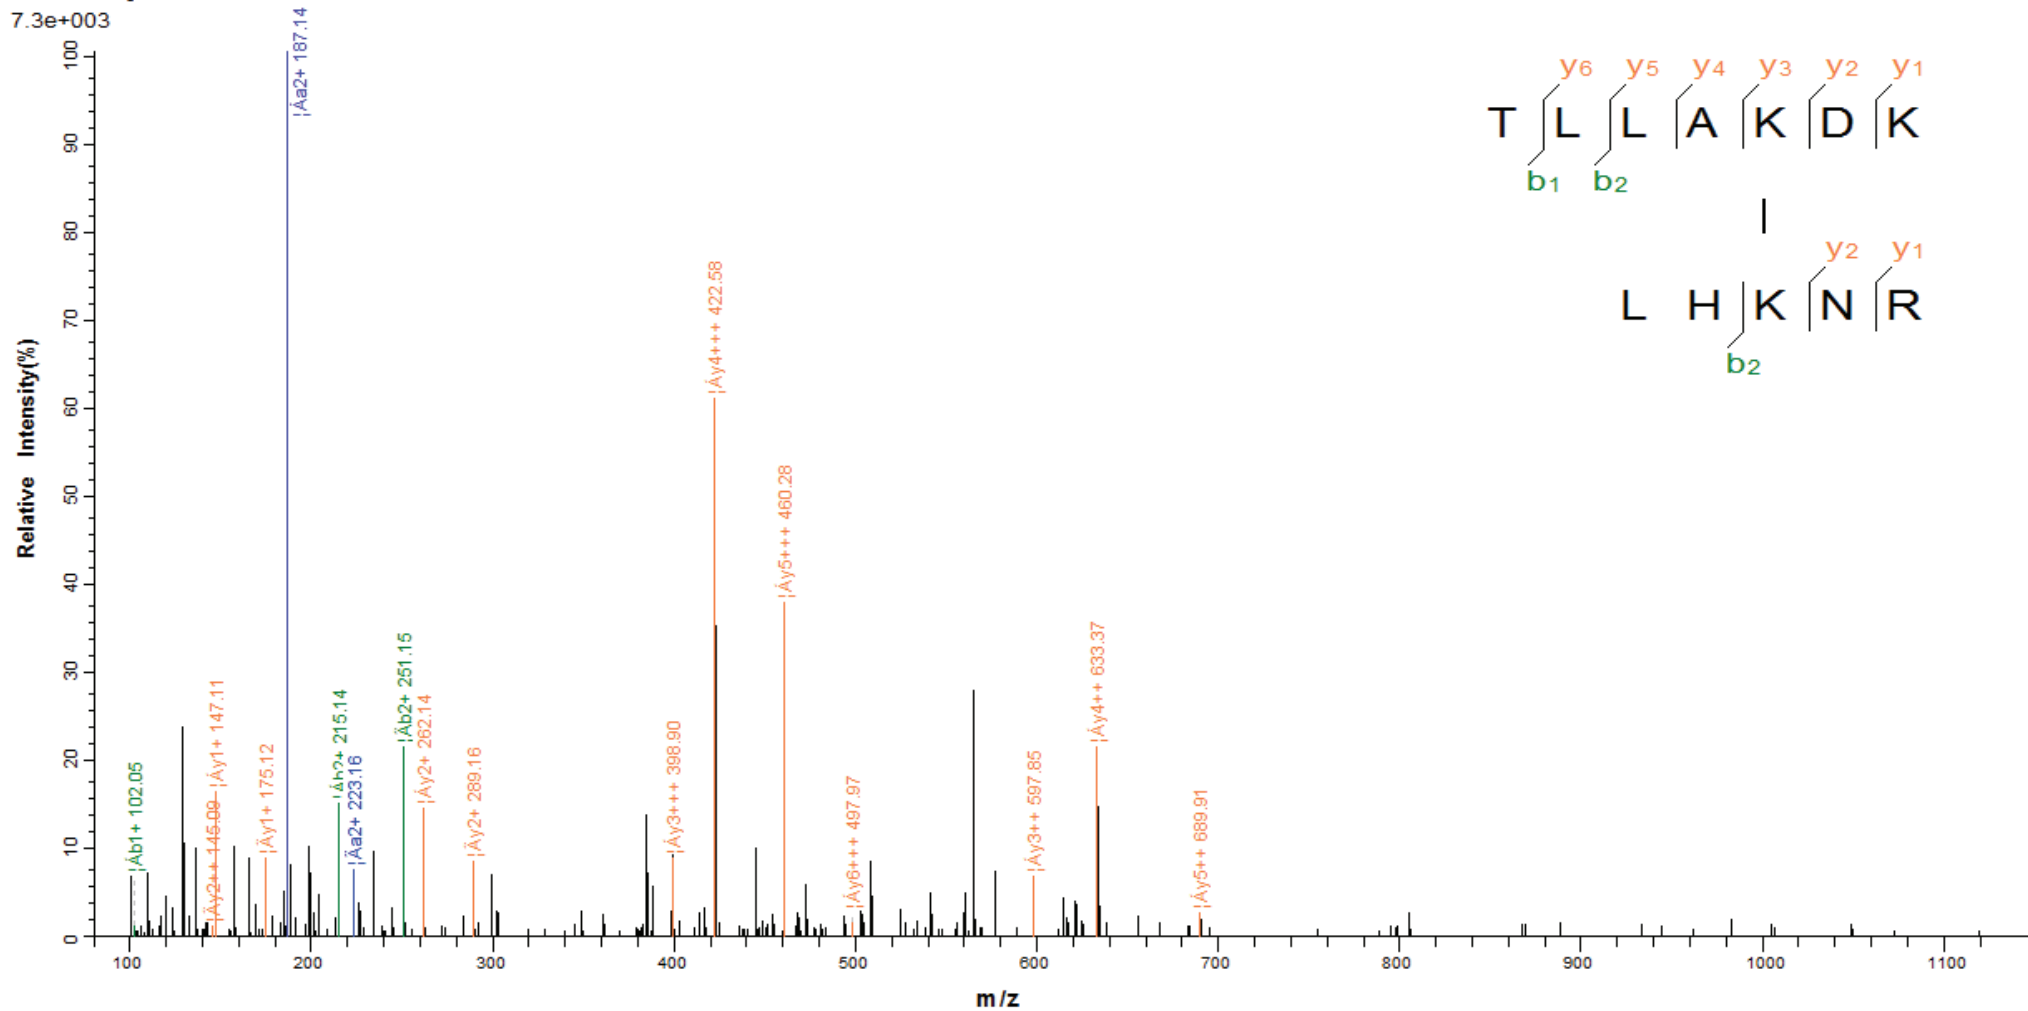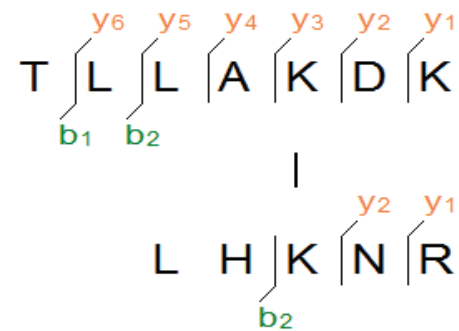



seq: TLLAKDK-RKDLK

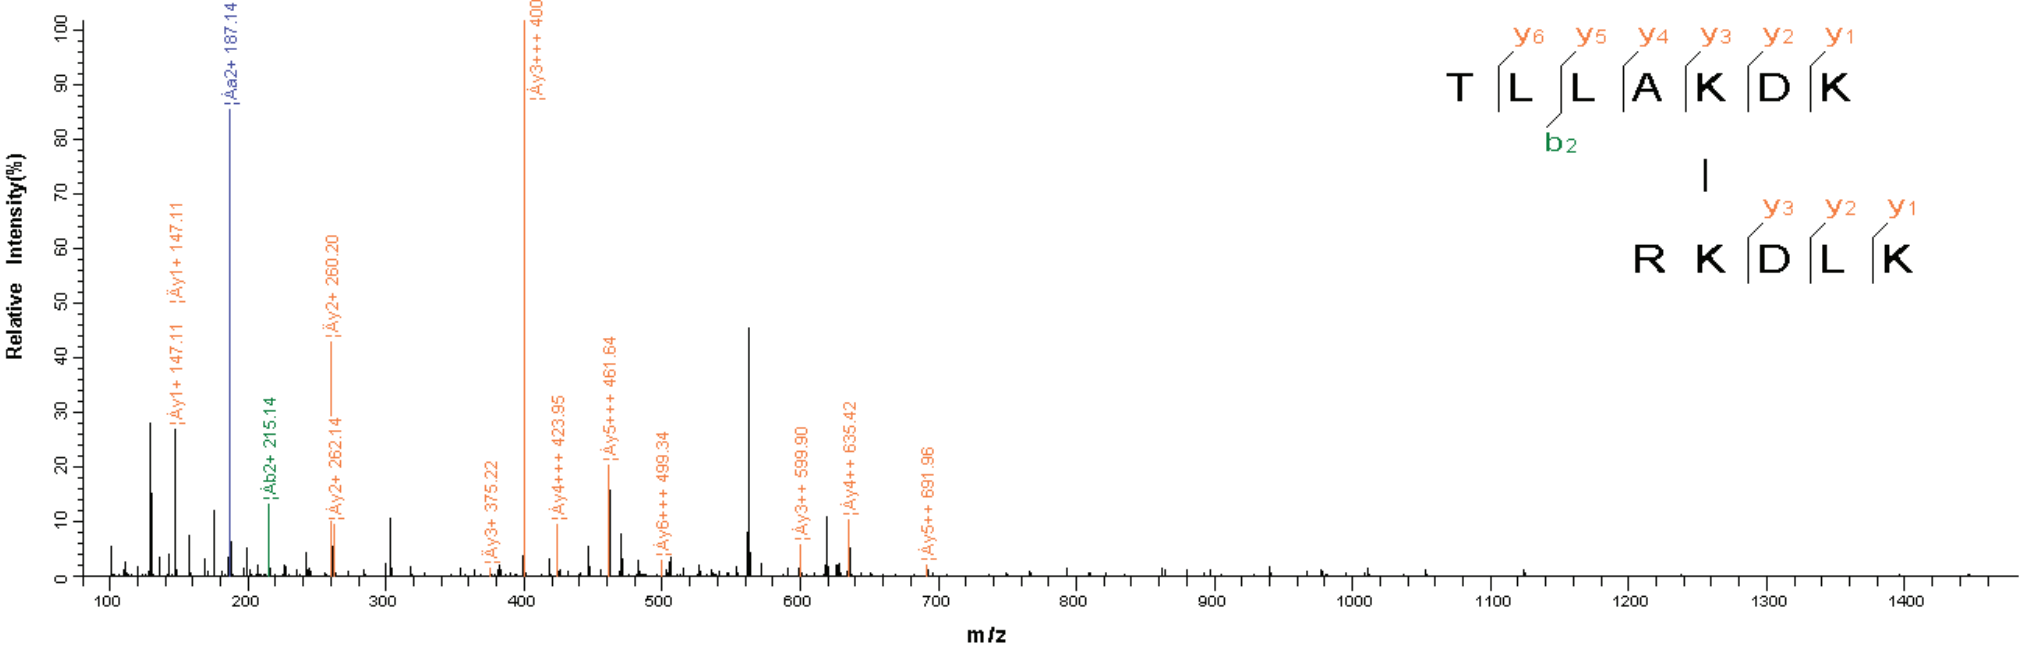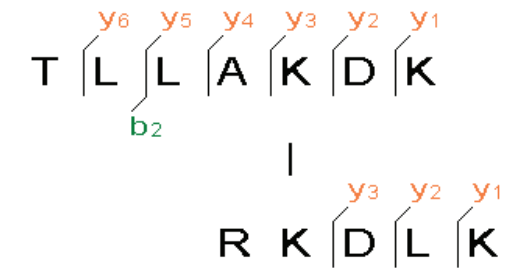



Seq: SNSDLEKQK-LSALKK

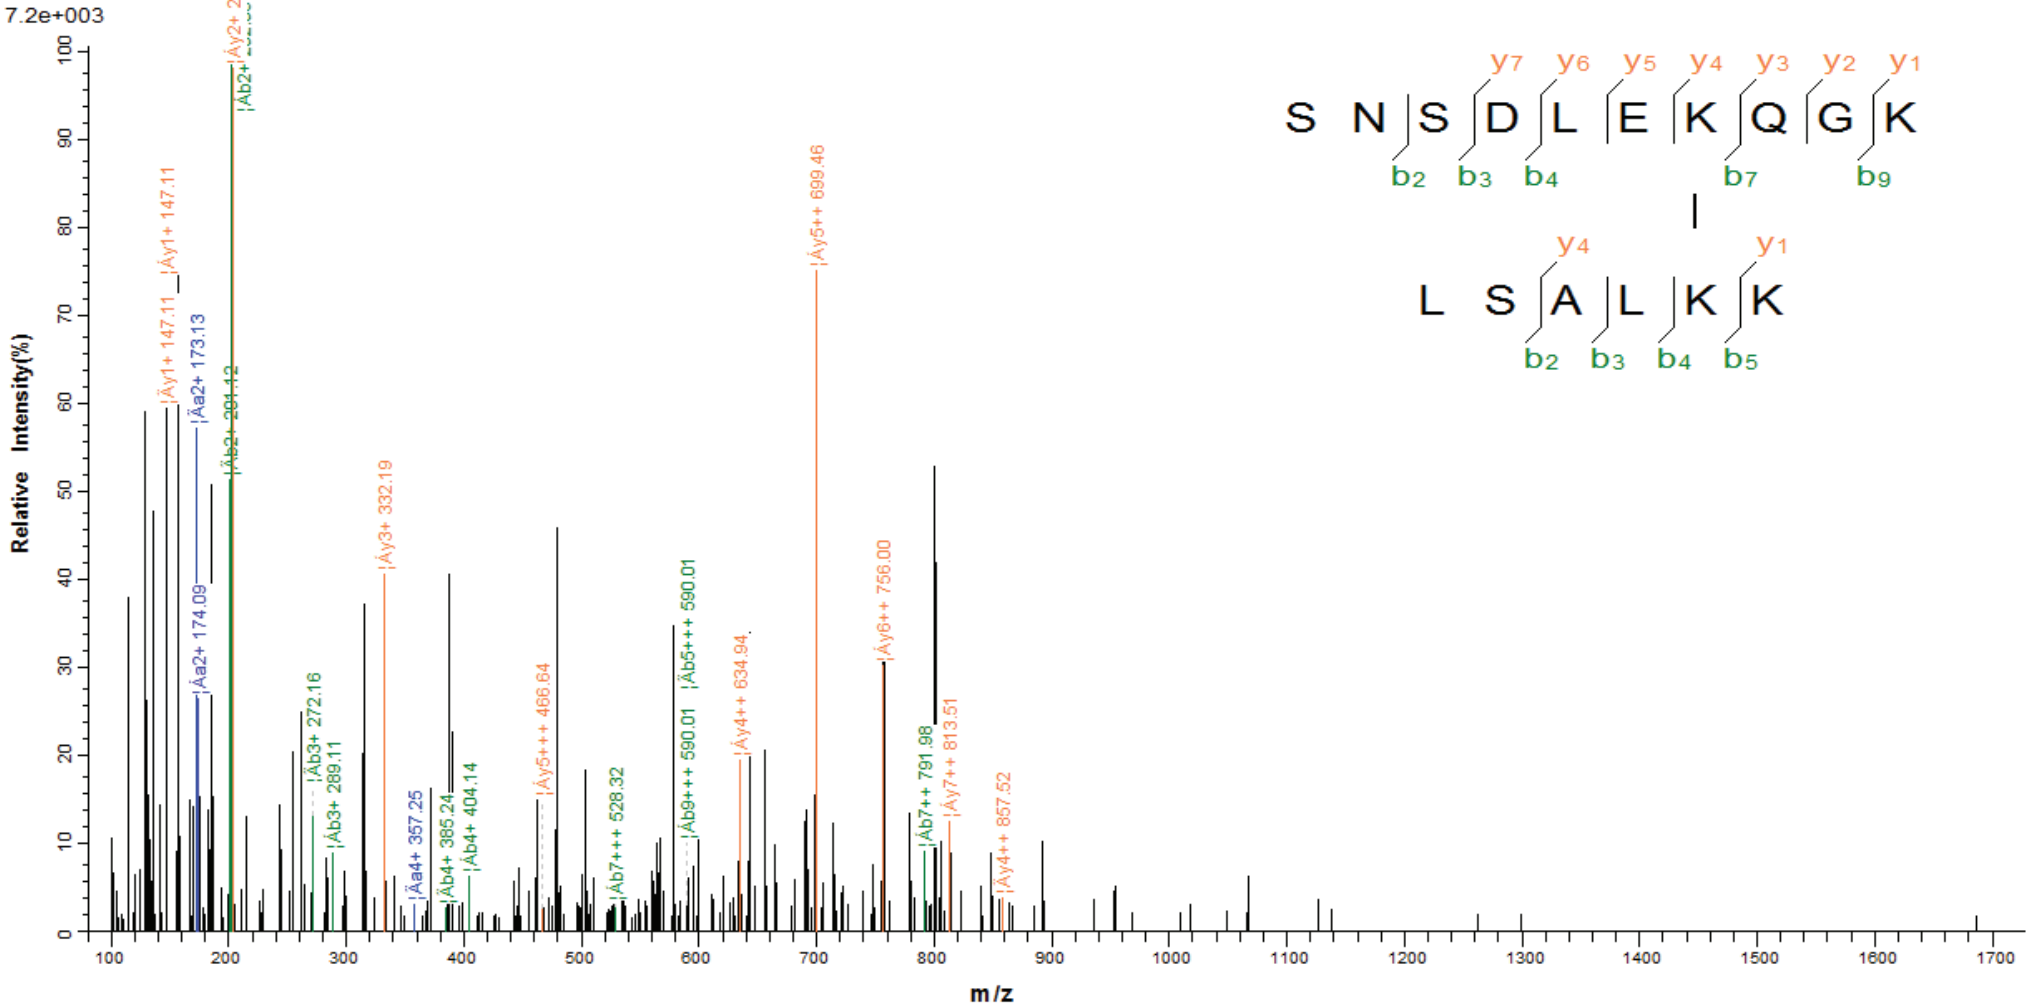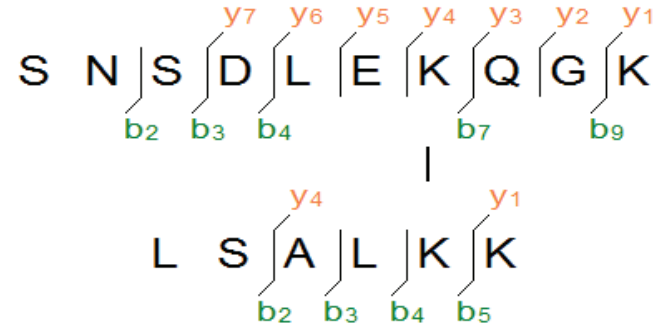

Seq: QGKSVTLDSK-ENELPTRK

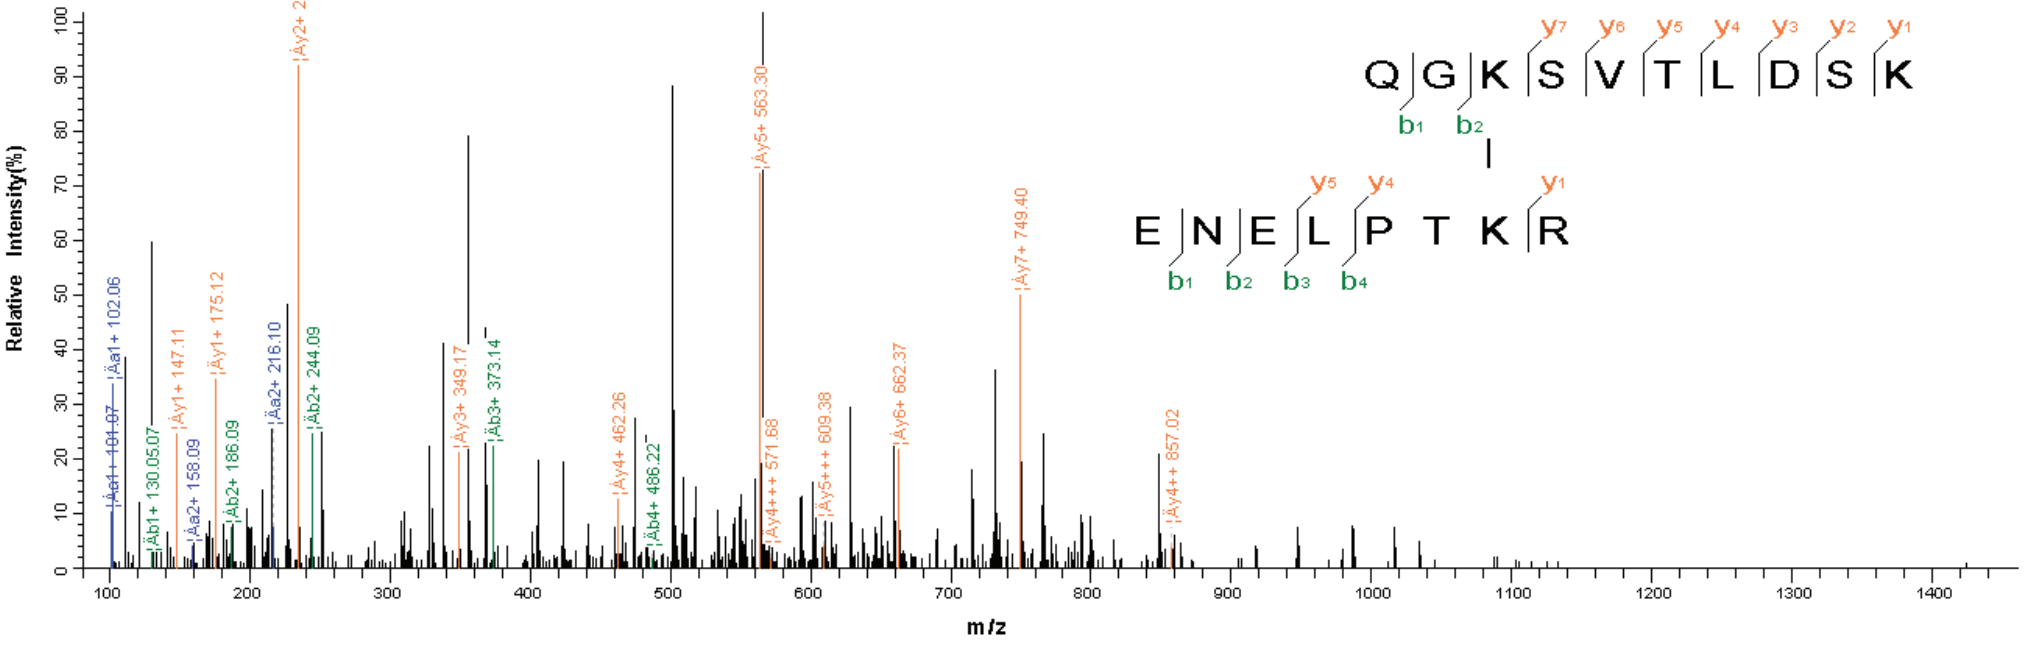

Seq: QGKSVTLDSK-KNSDLEK

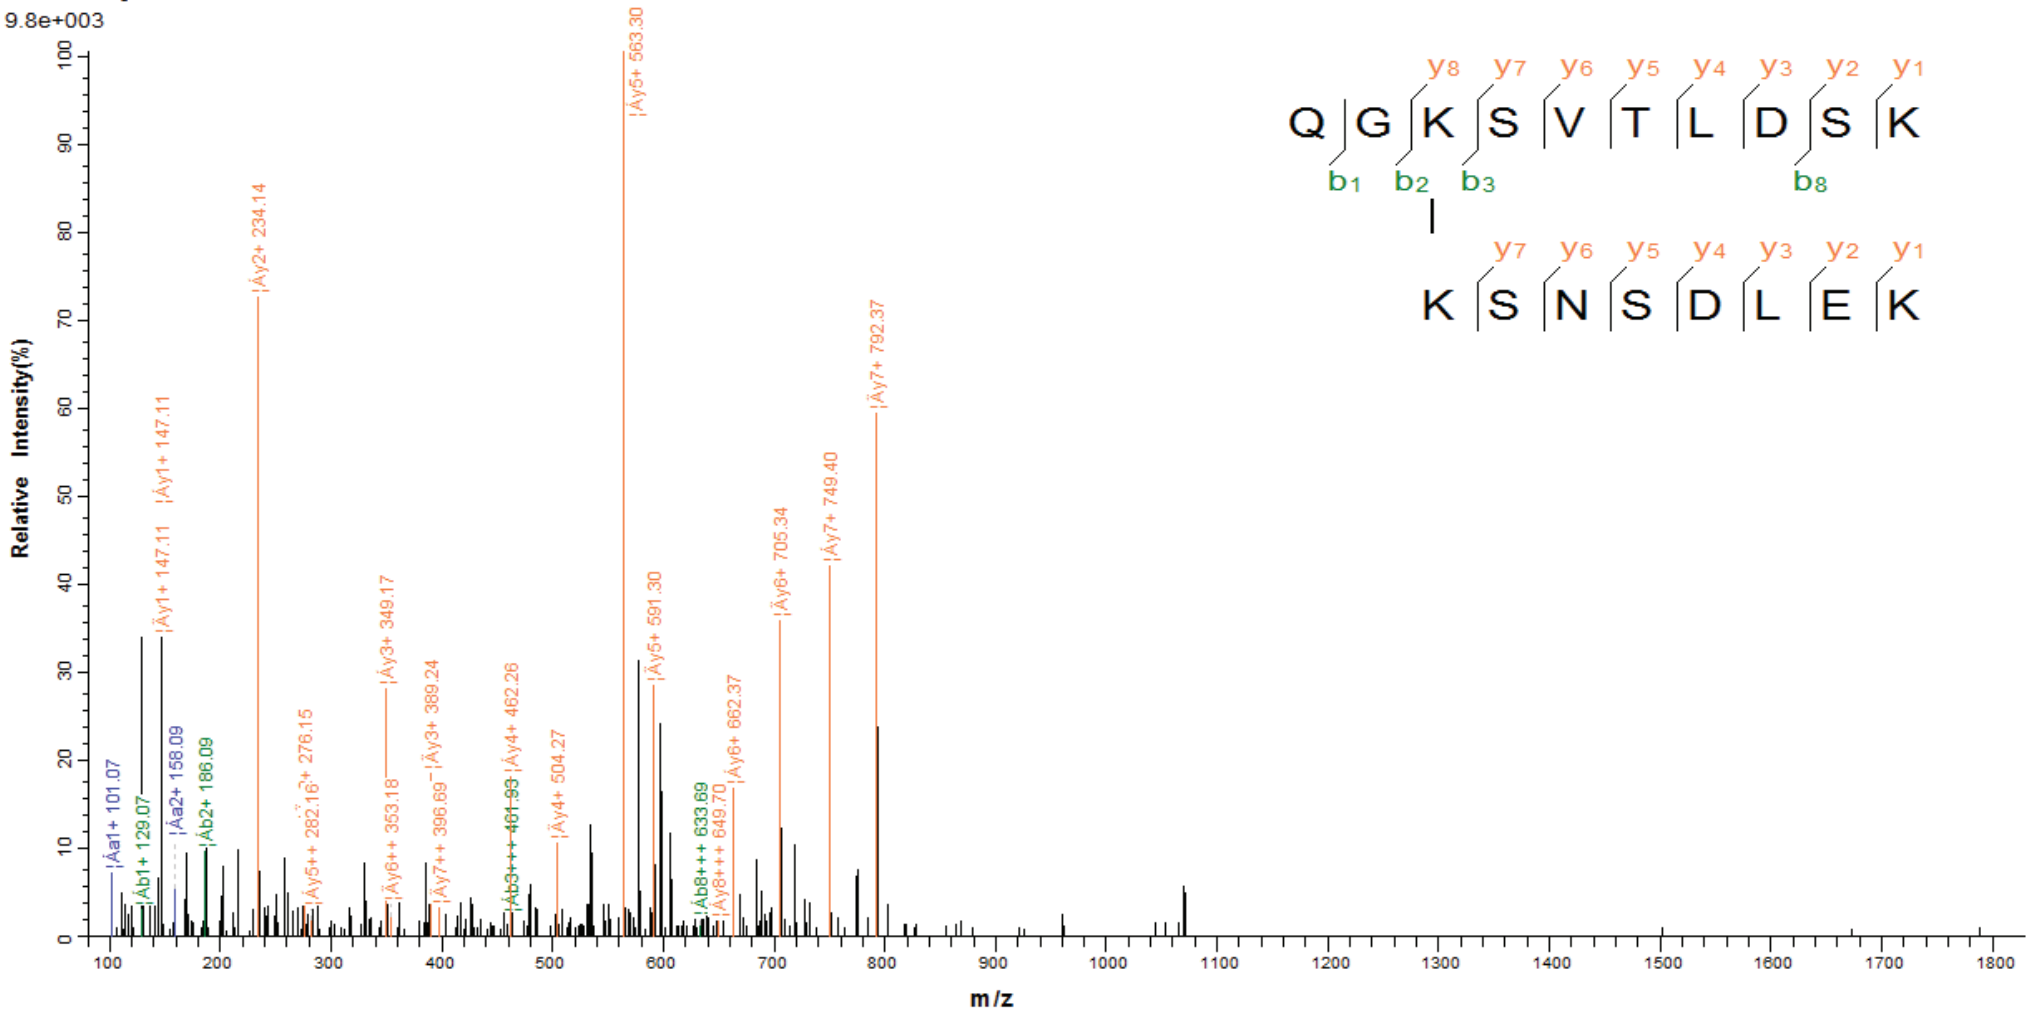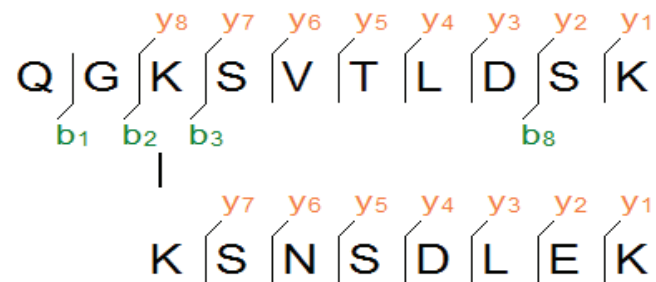

Fig. S18

Annotated high-resolution HCD spectra  
of crosslink peptides of Beclin1 complex

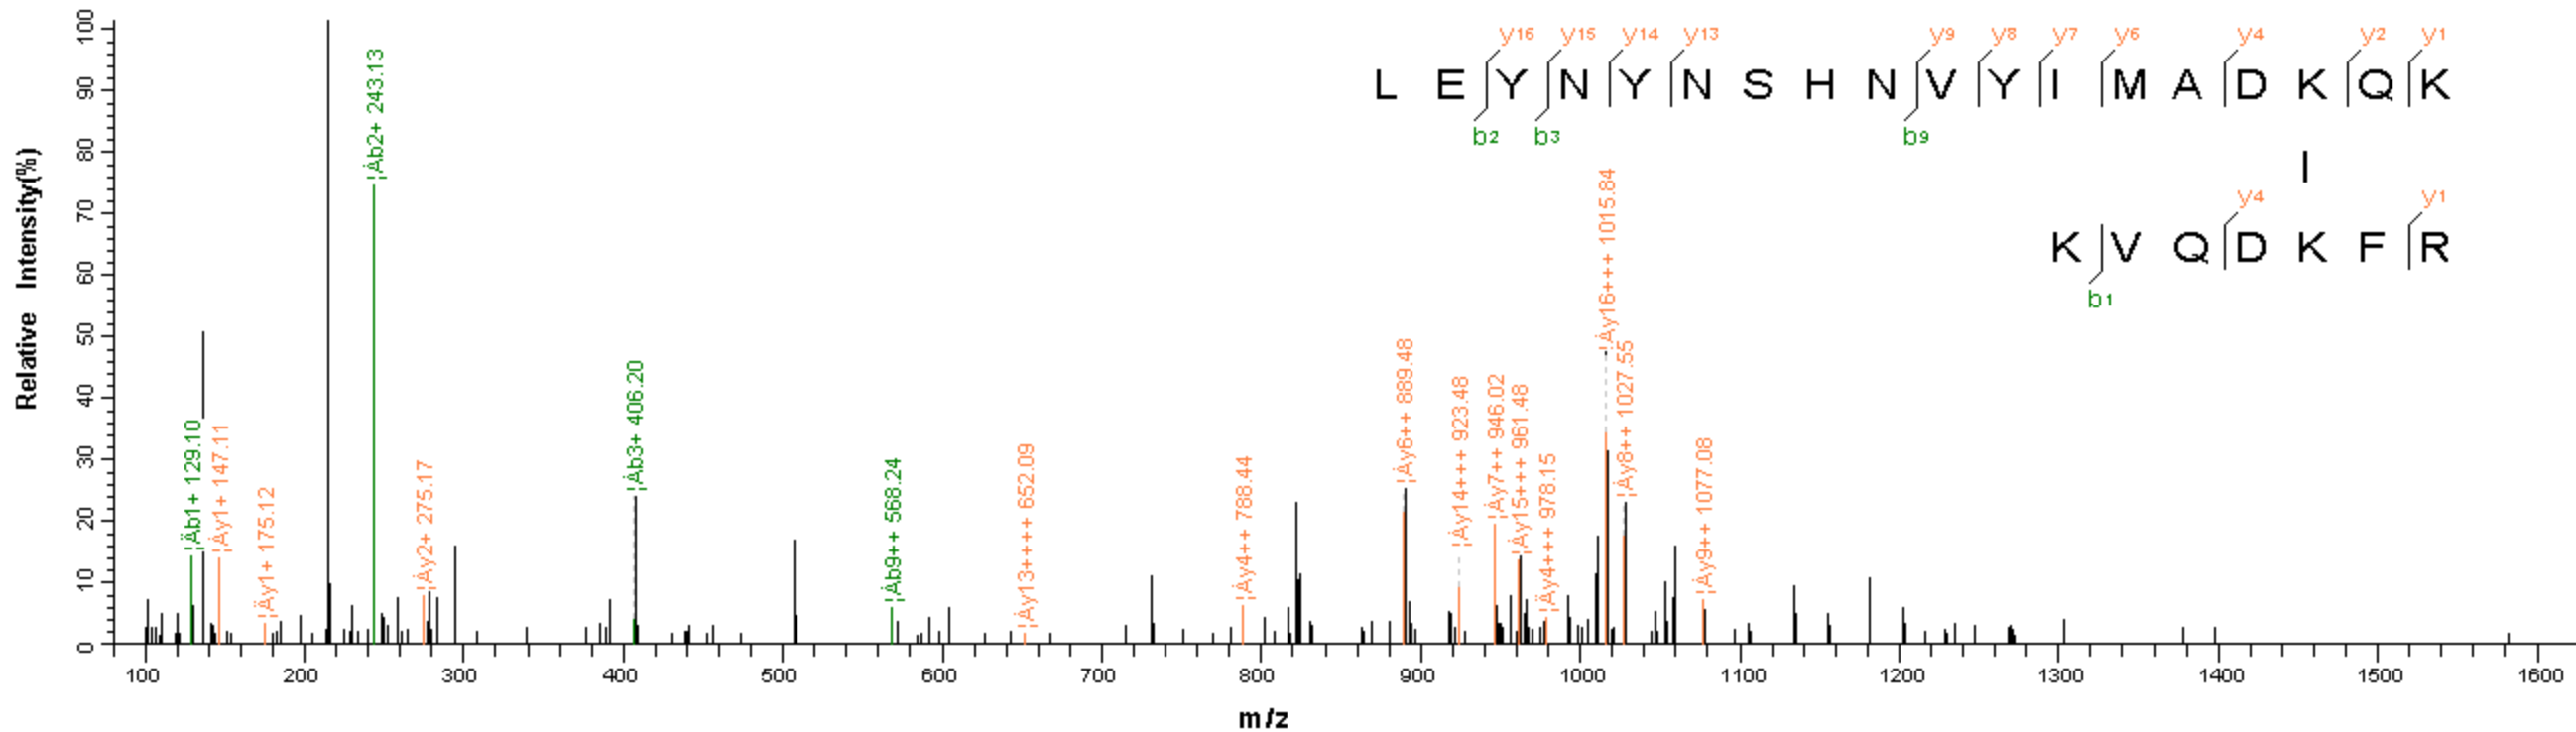

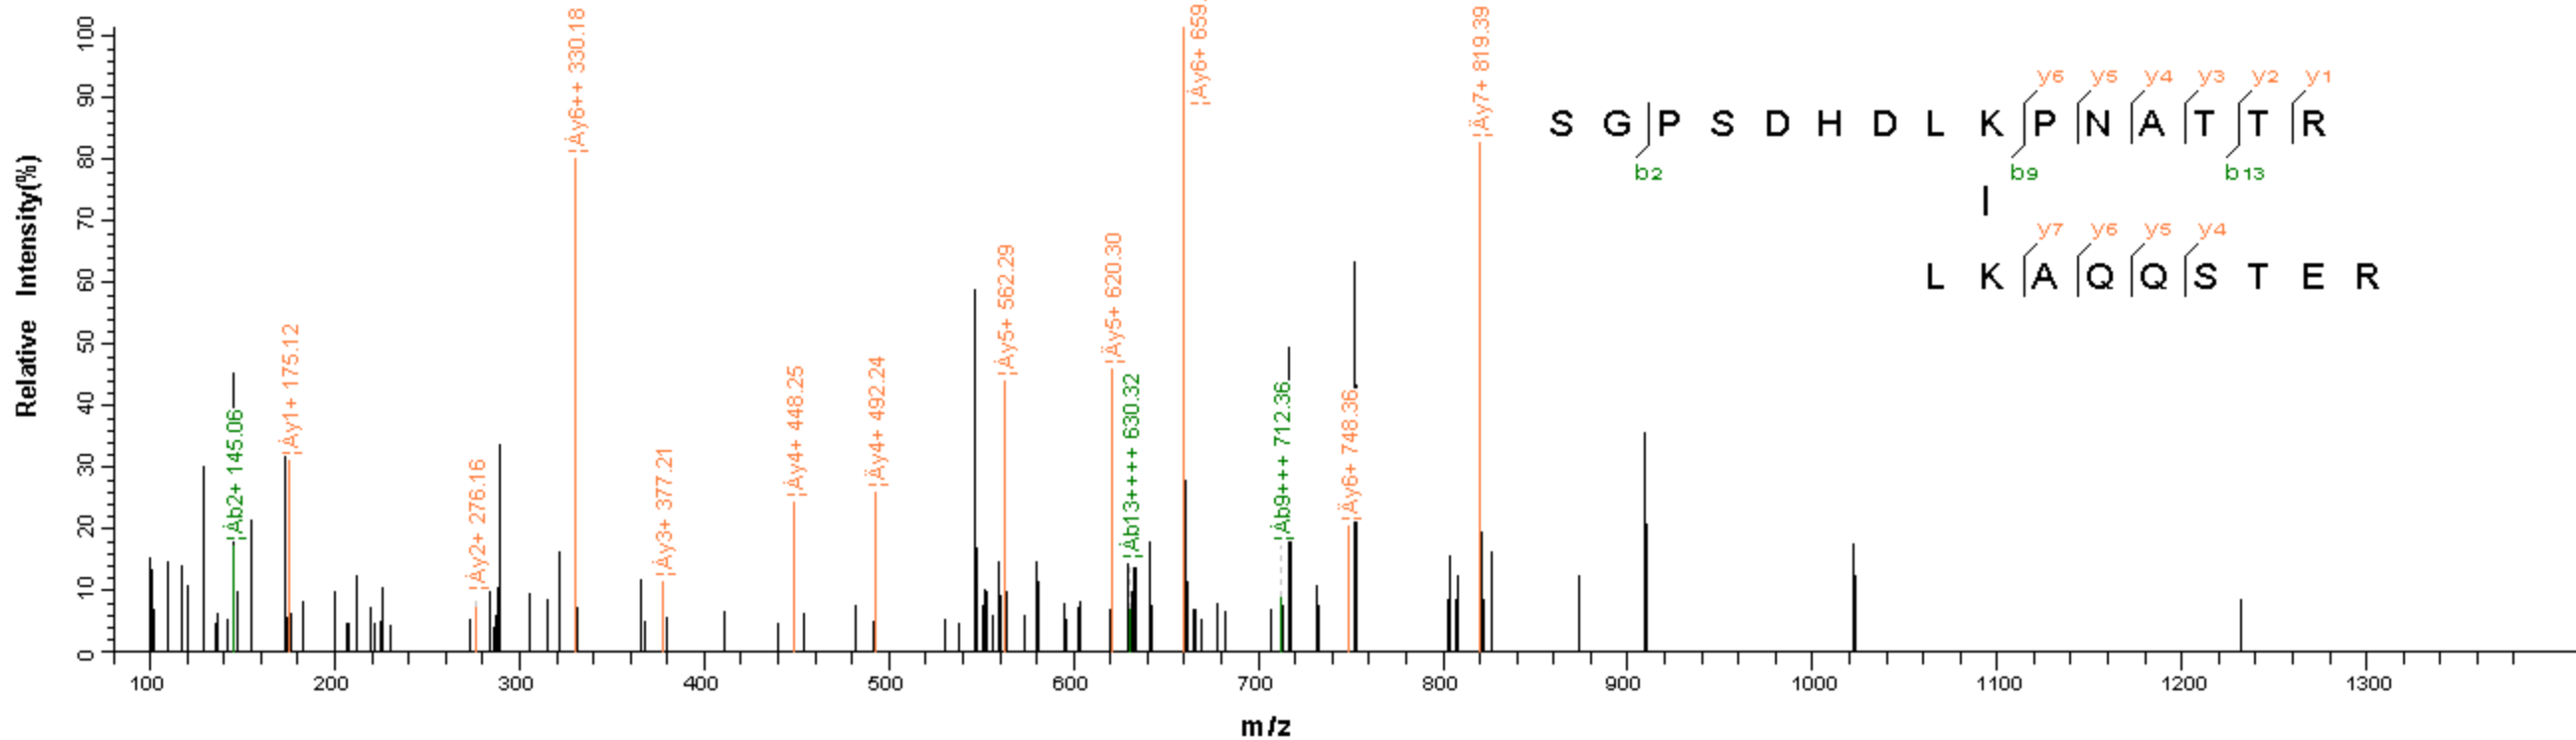



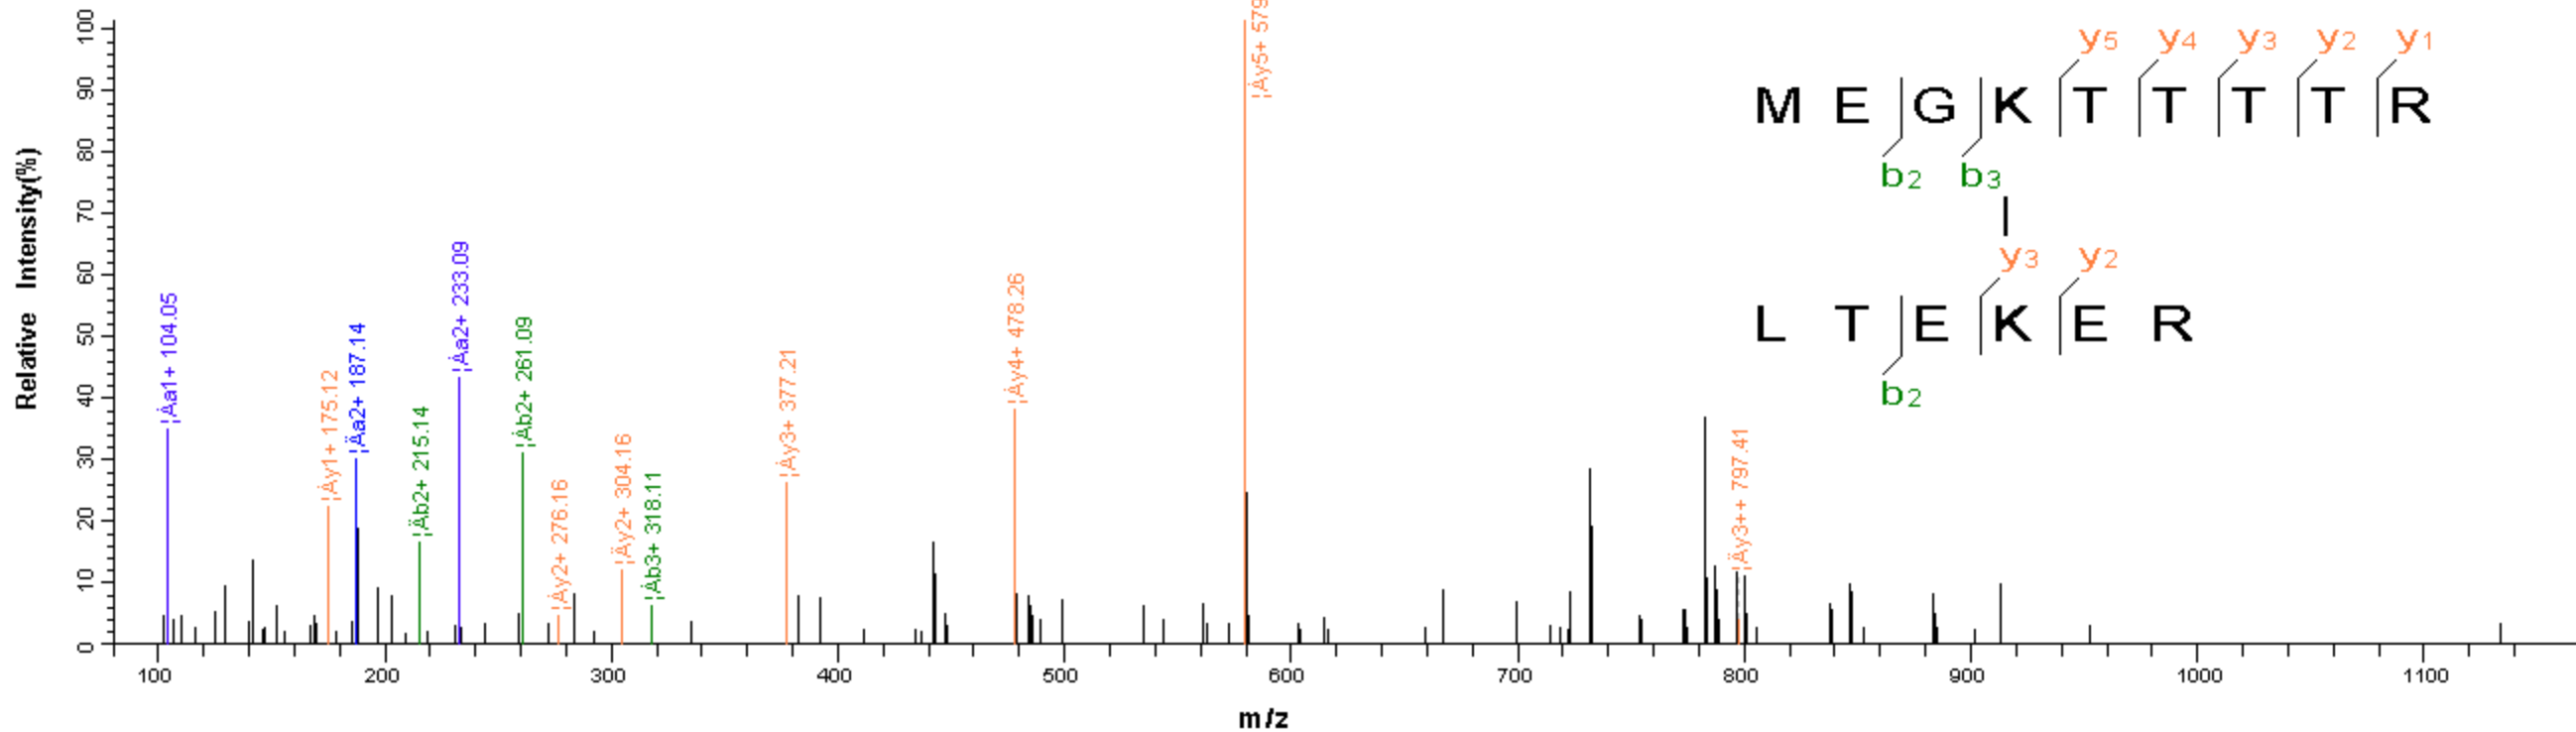

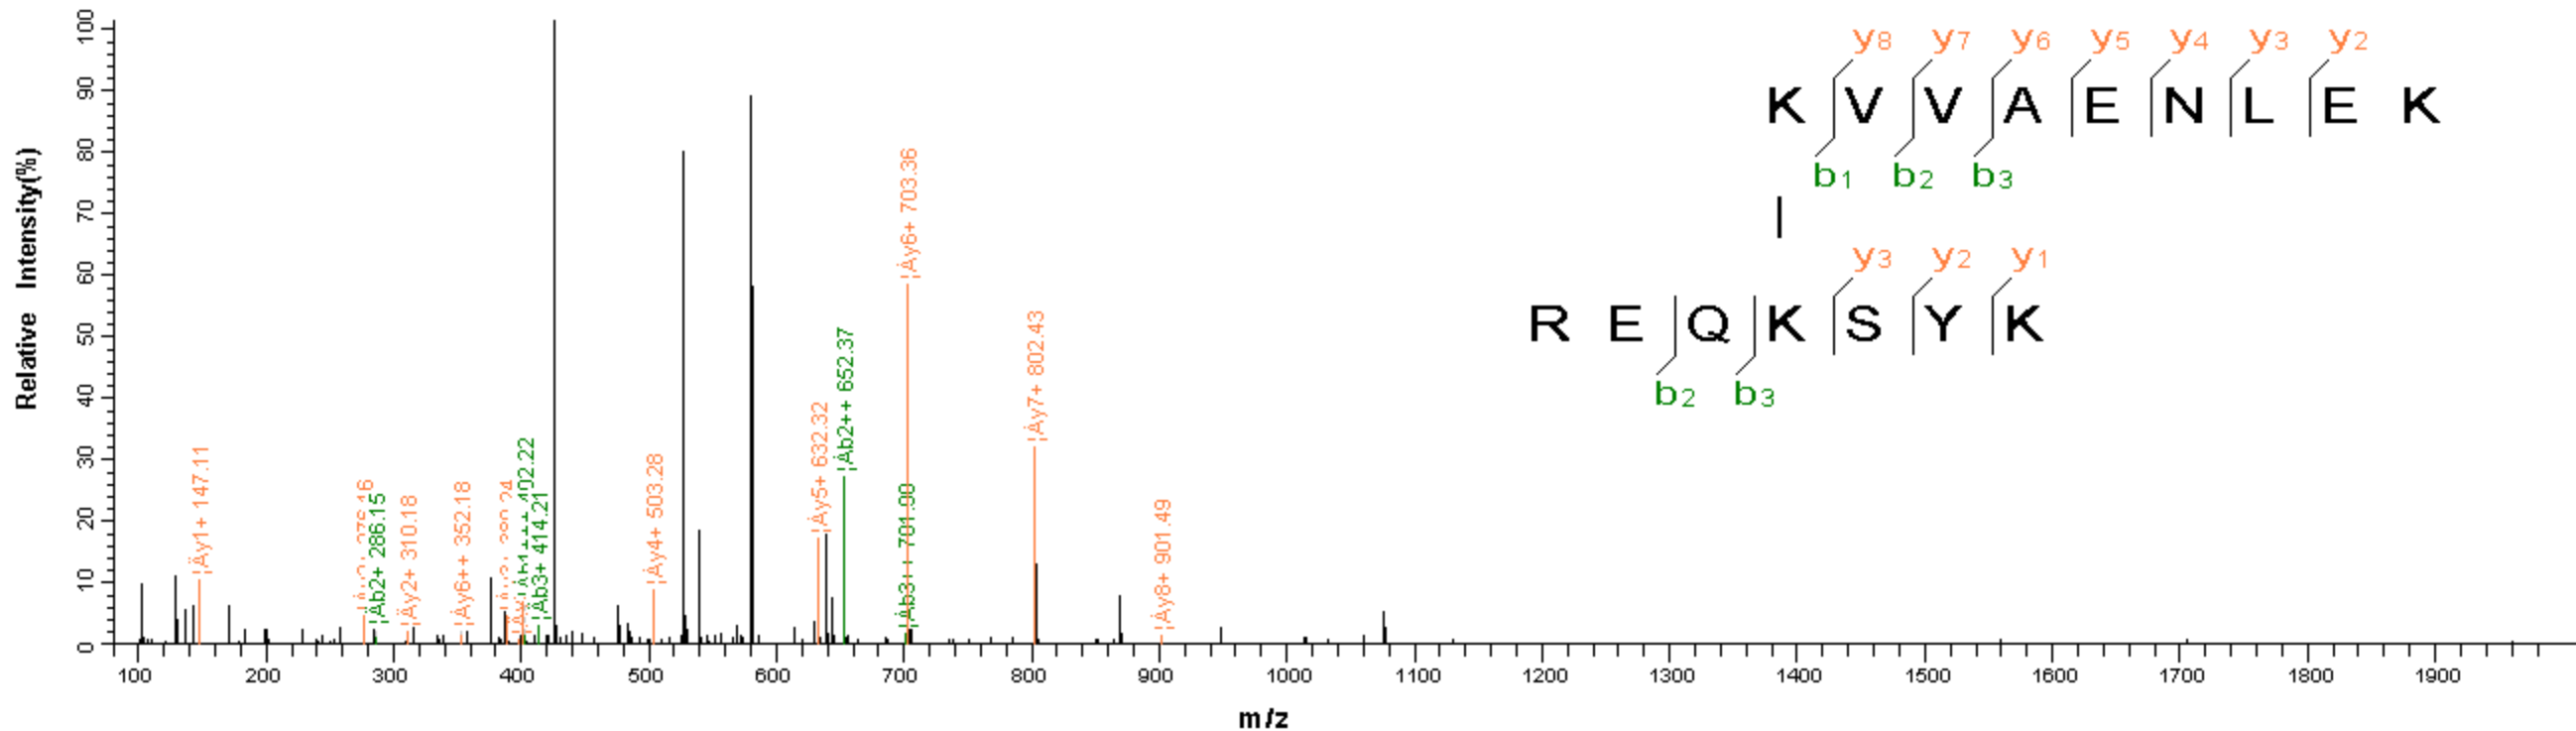

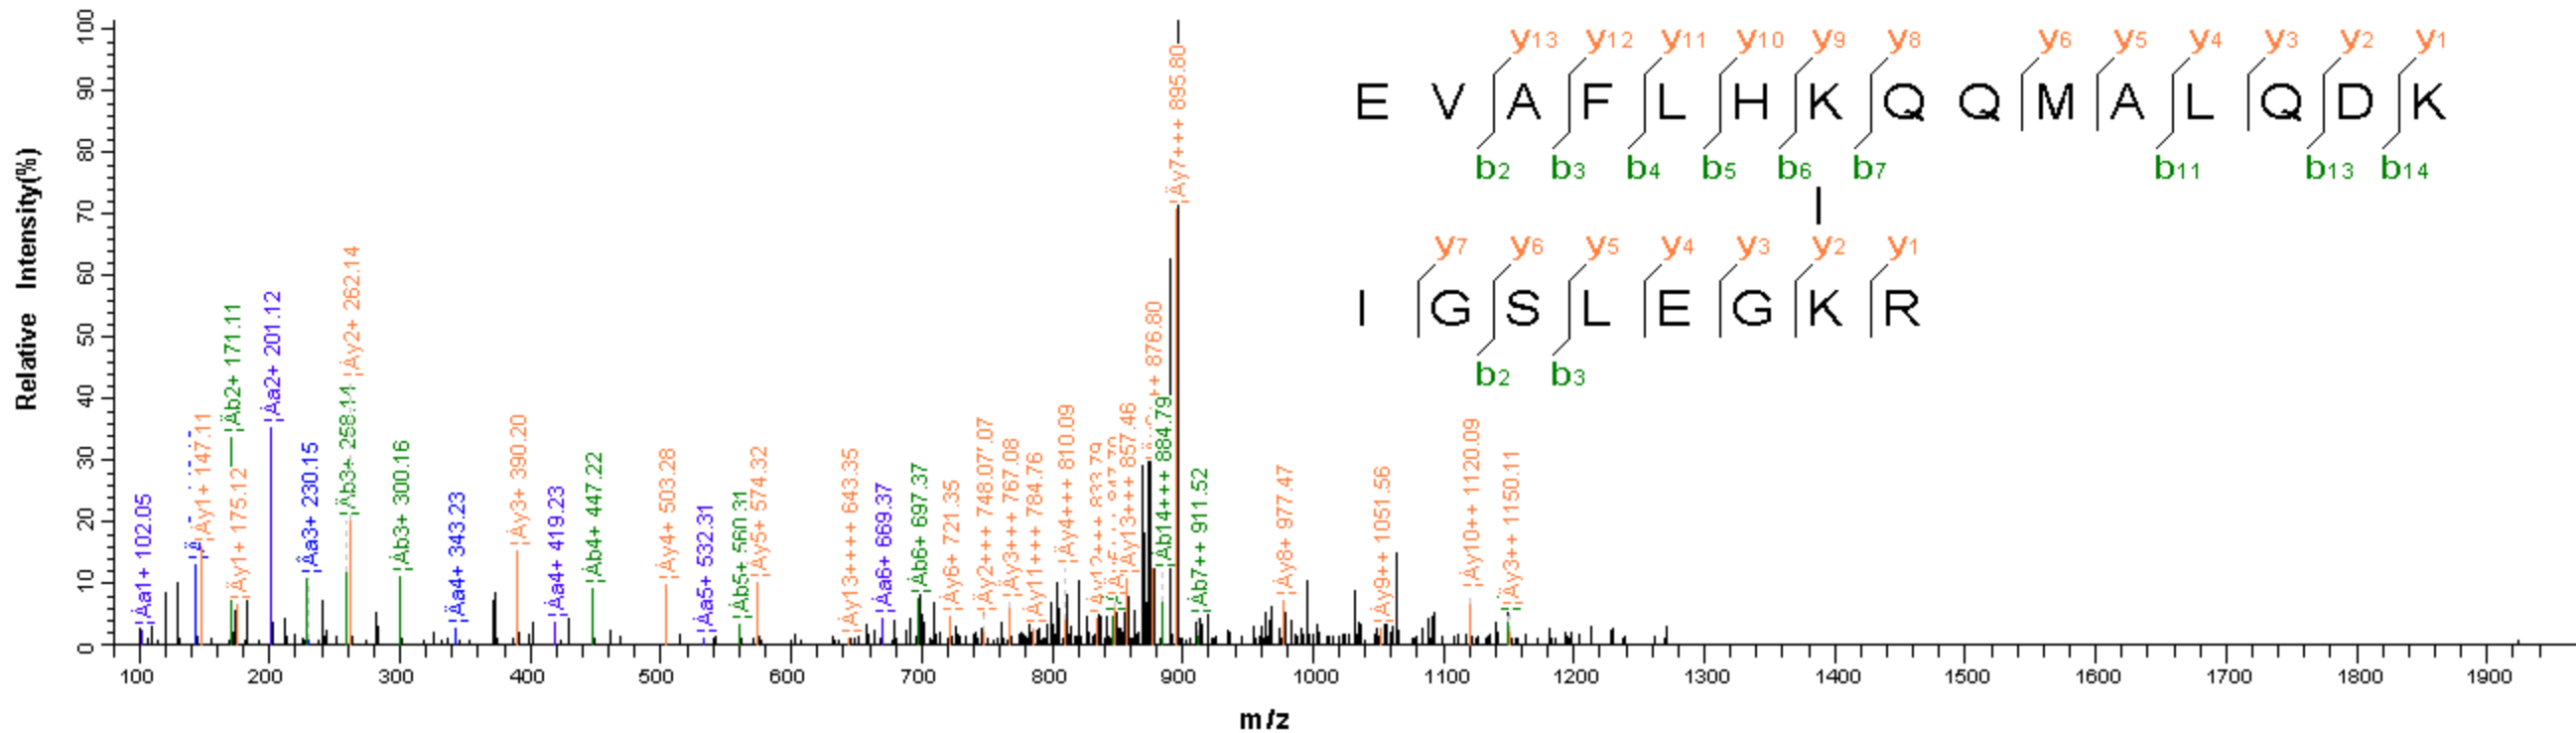

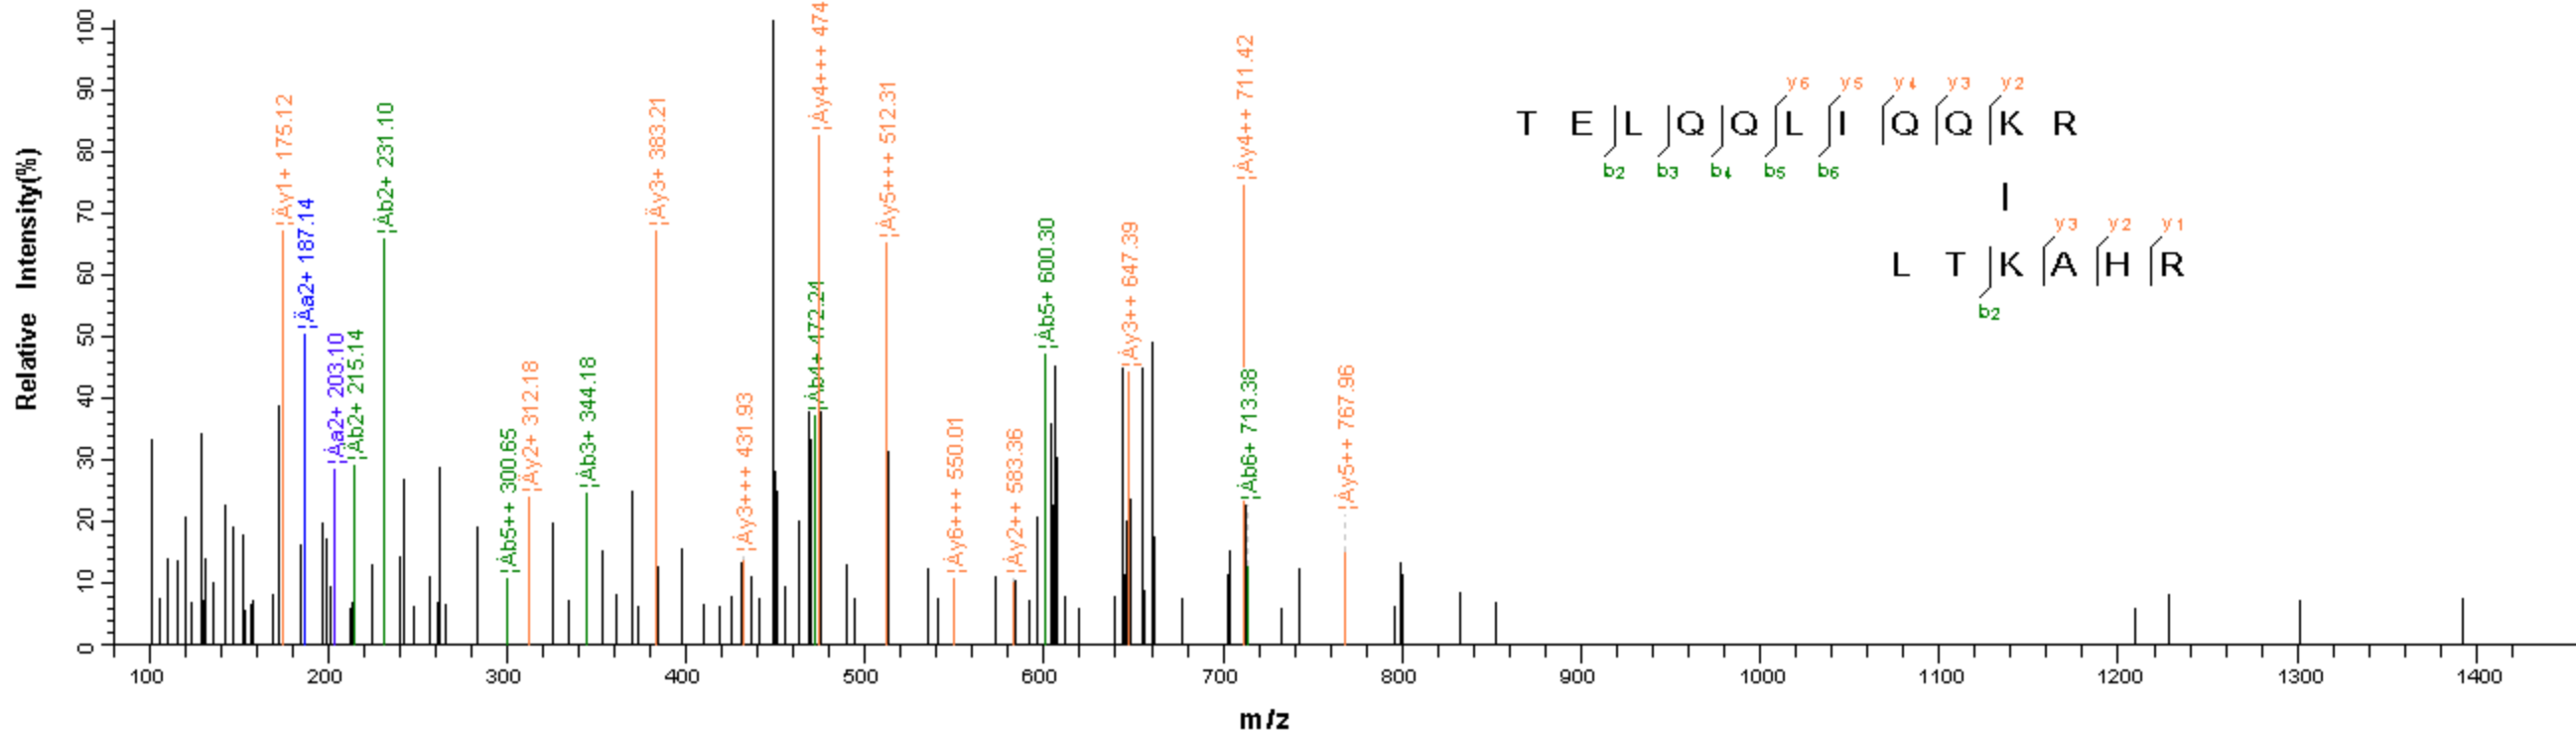

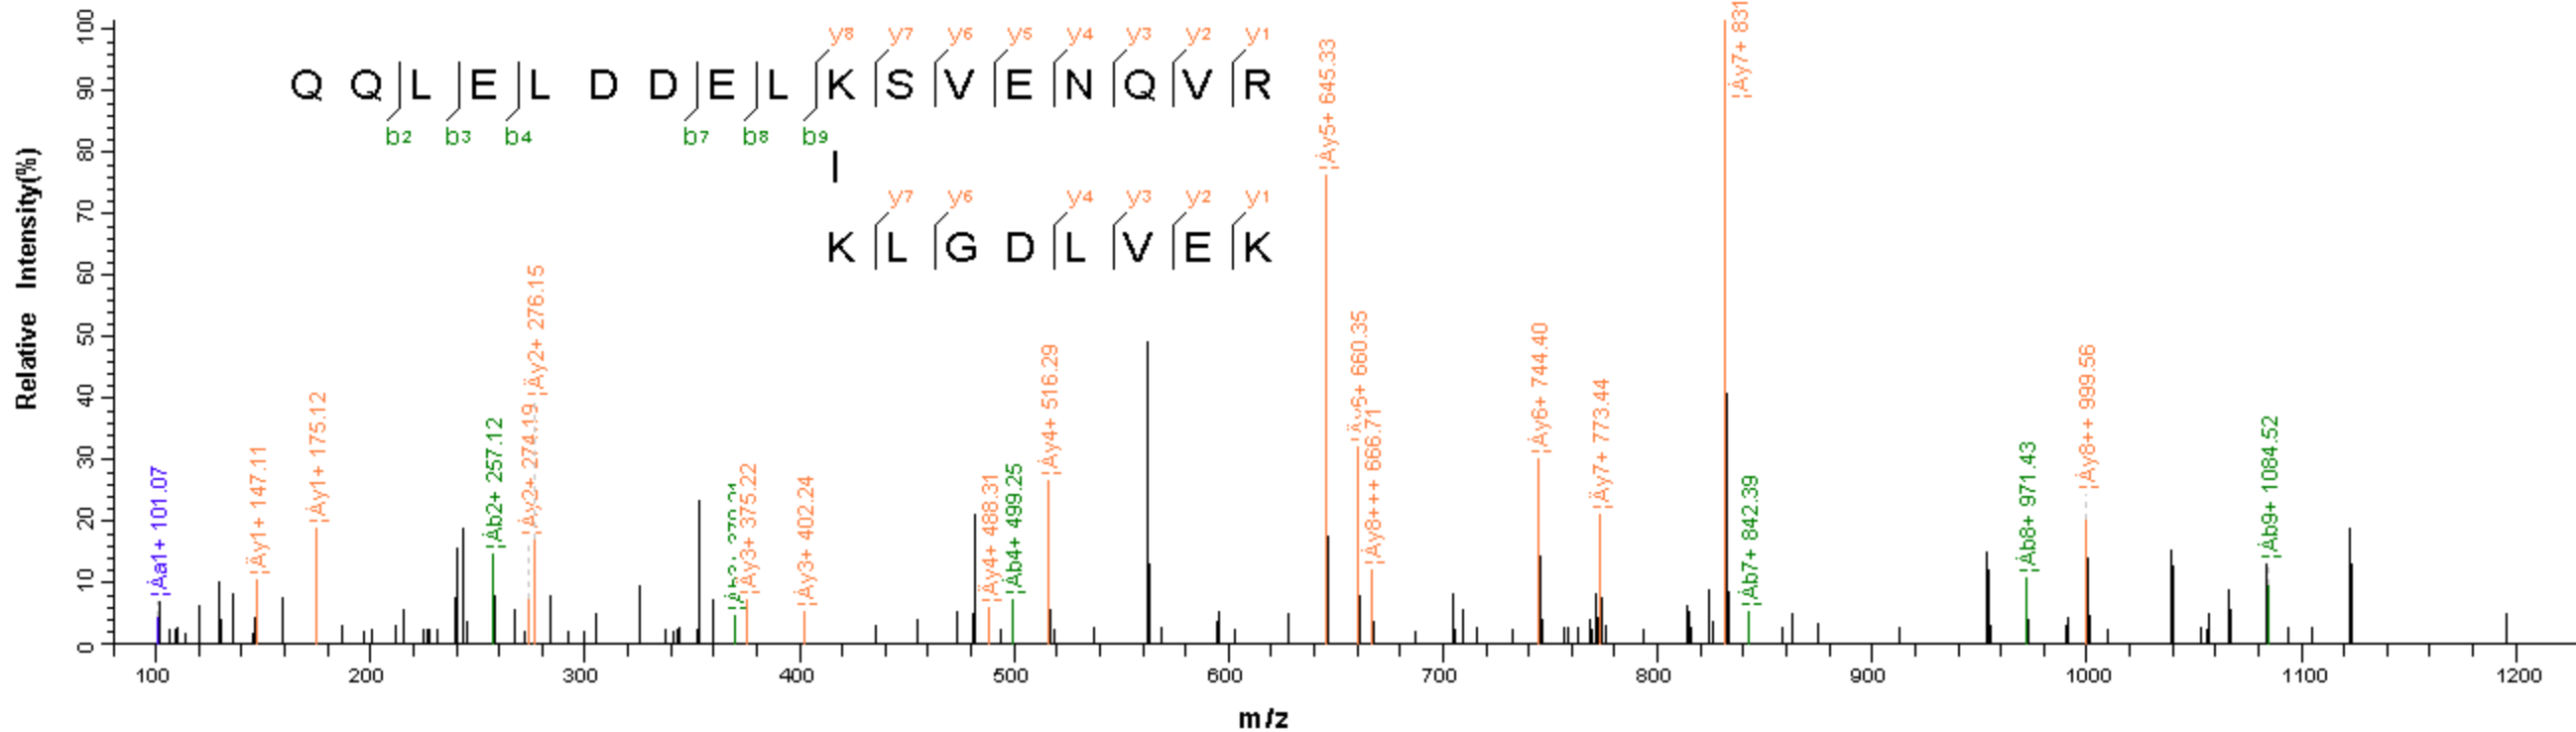

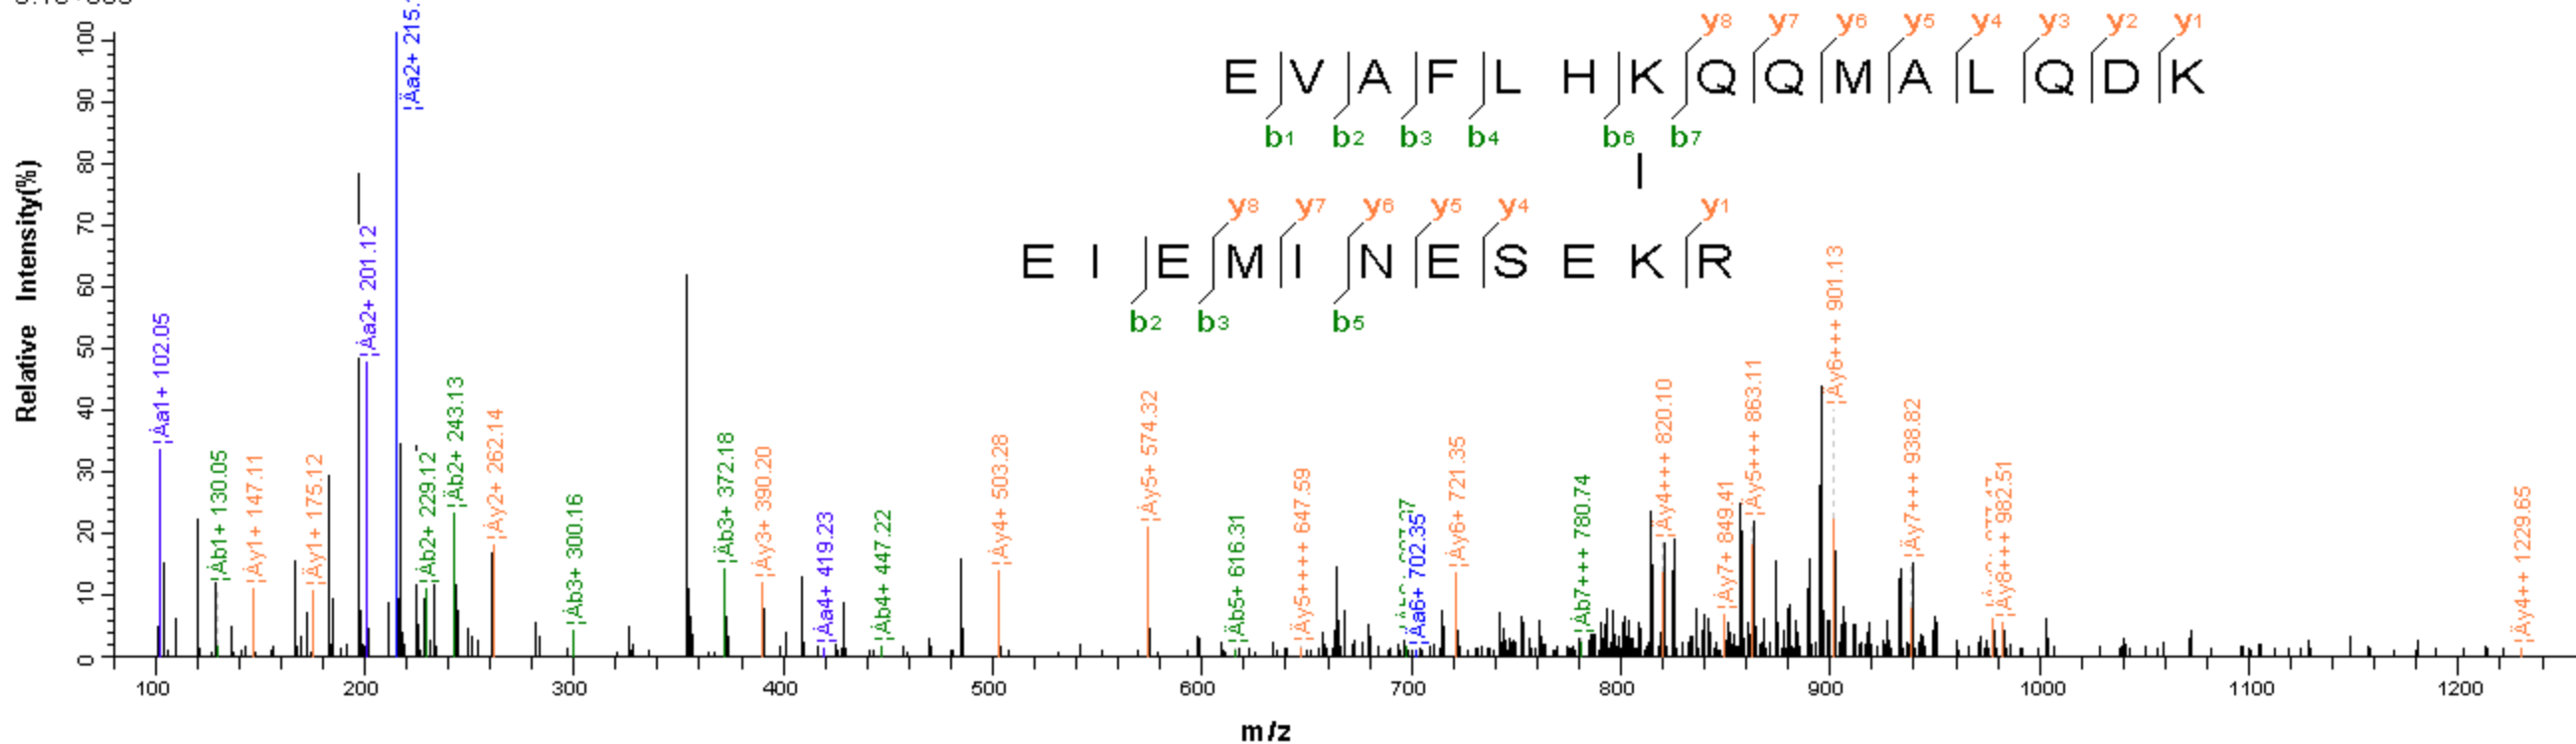

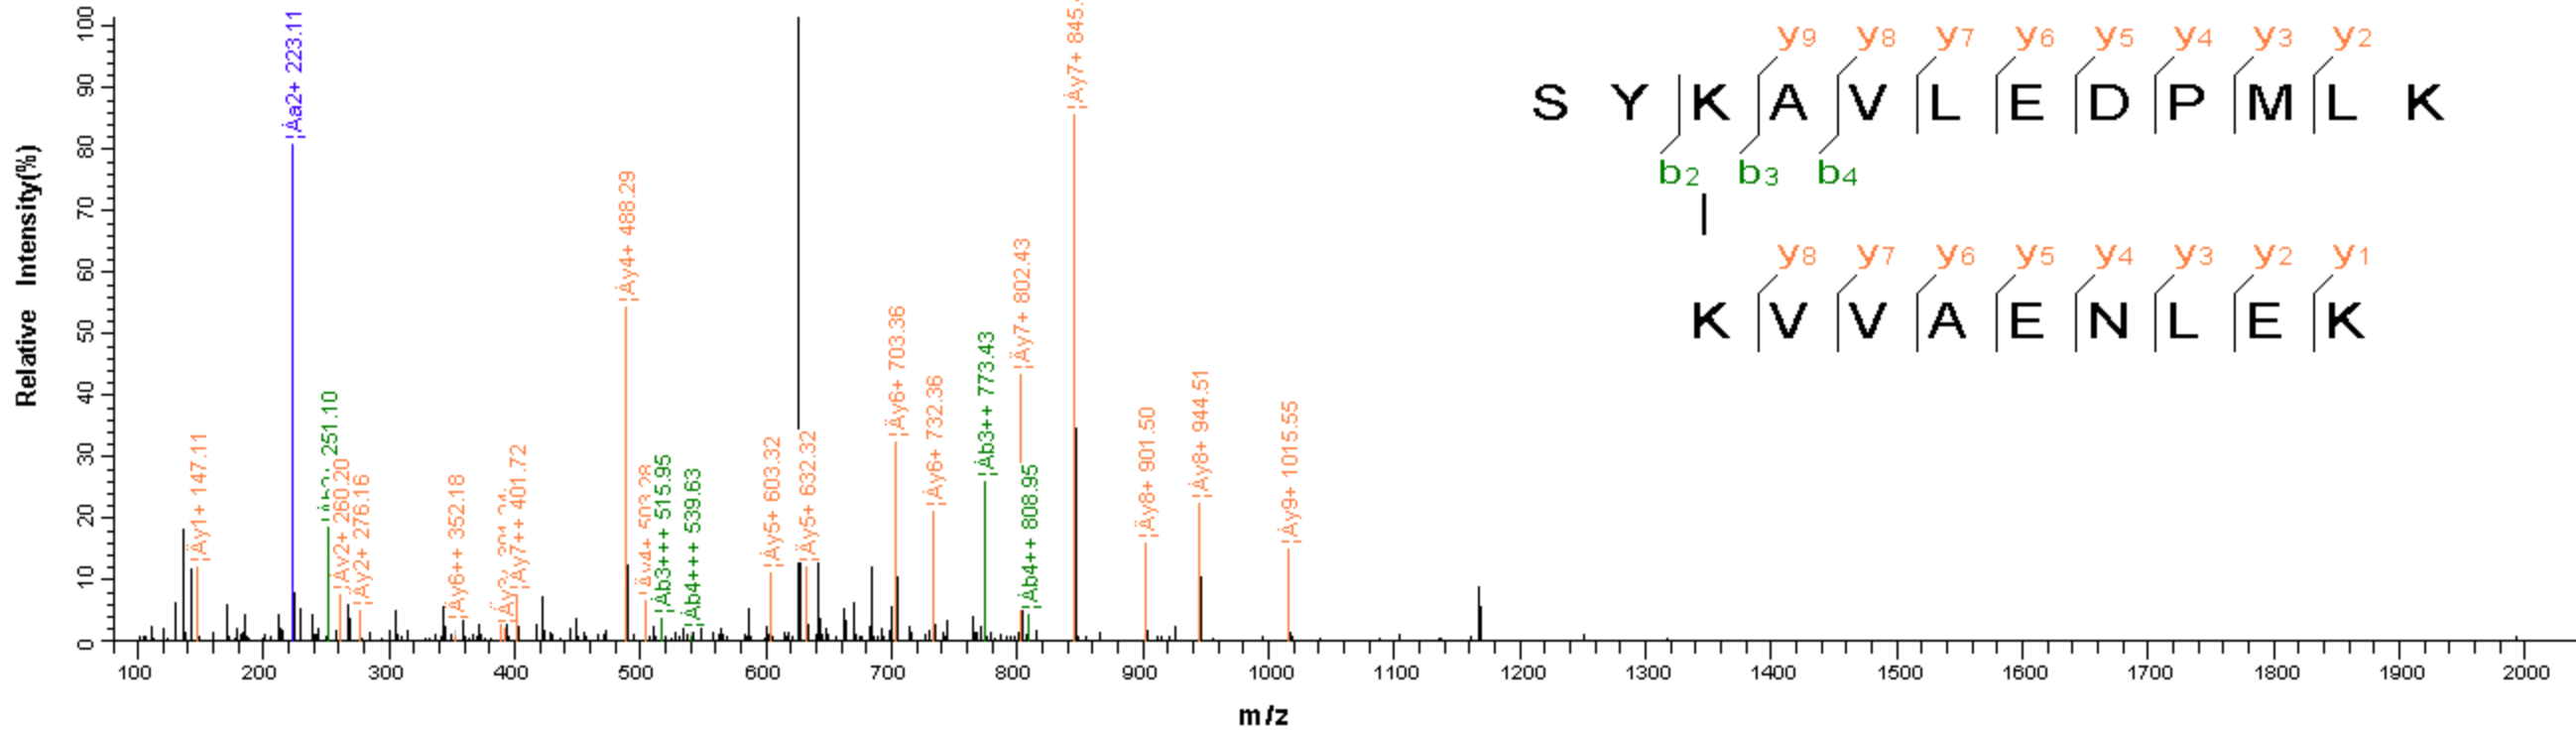

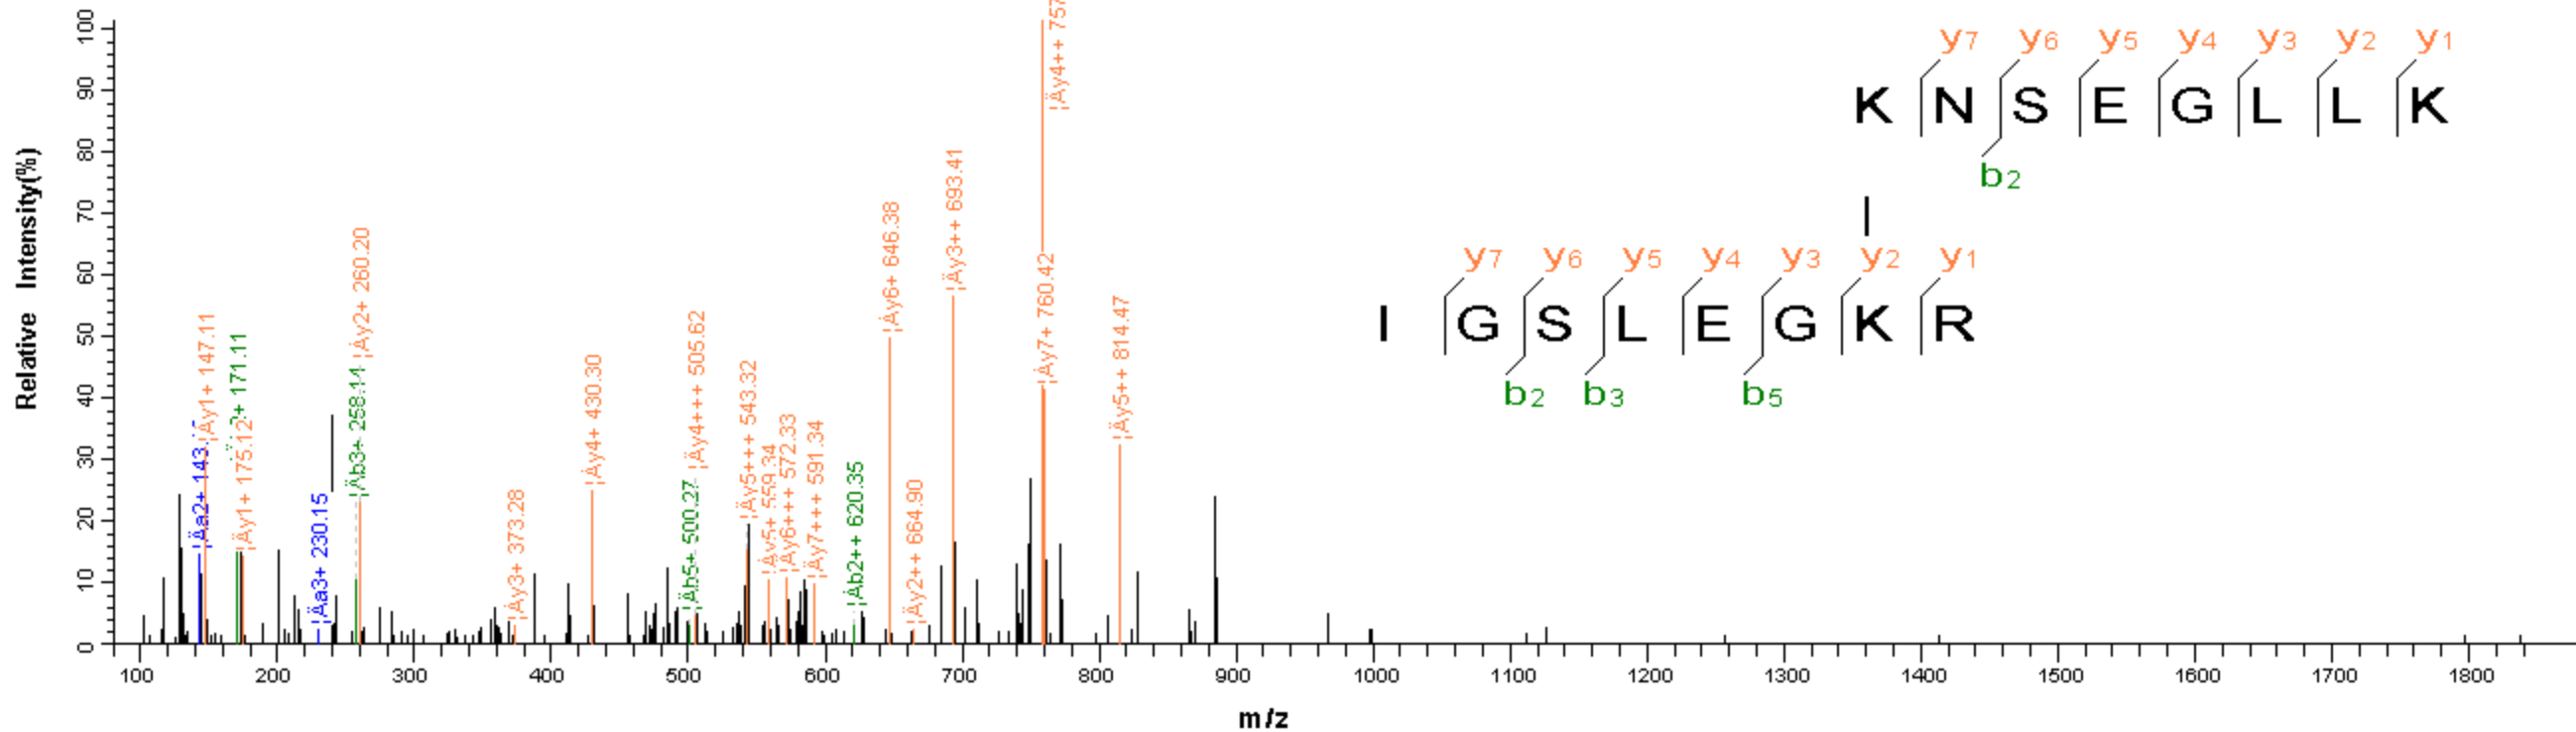



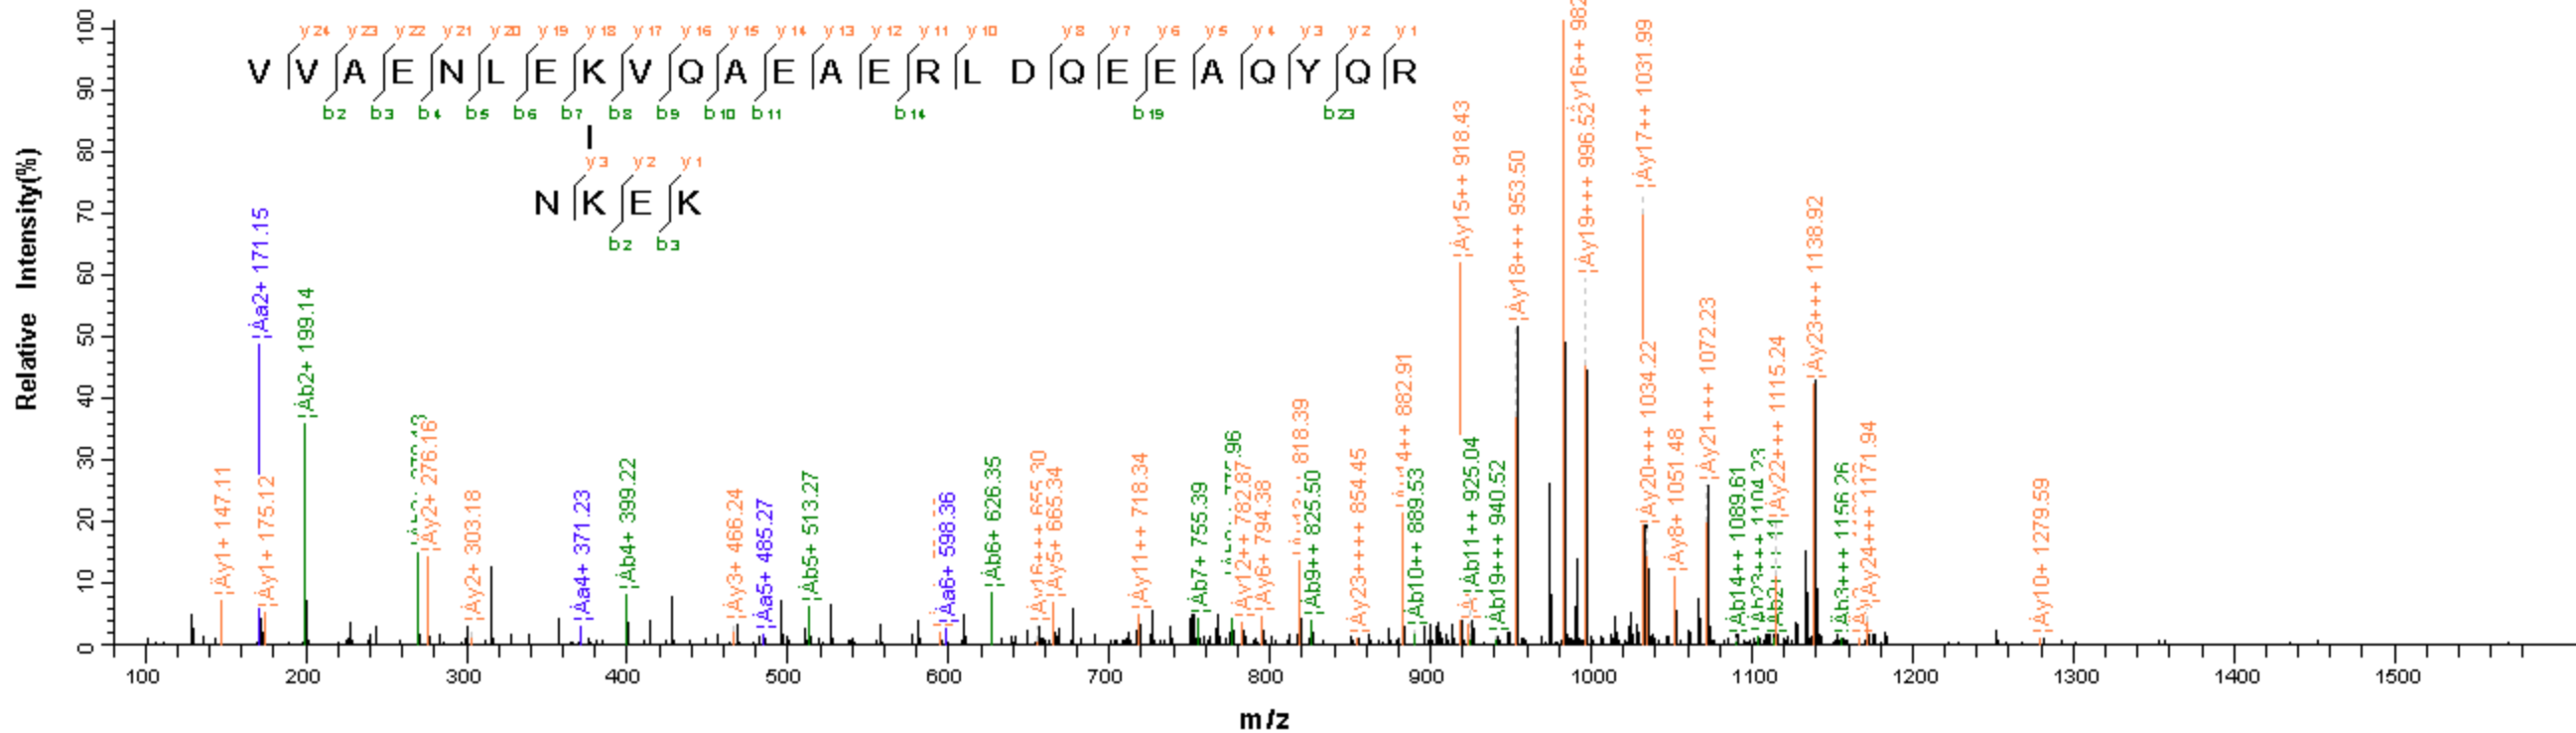

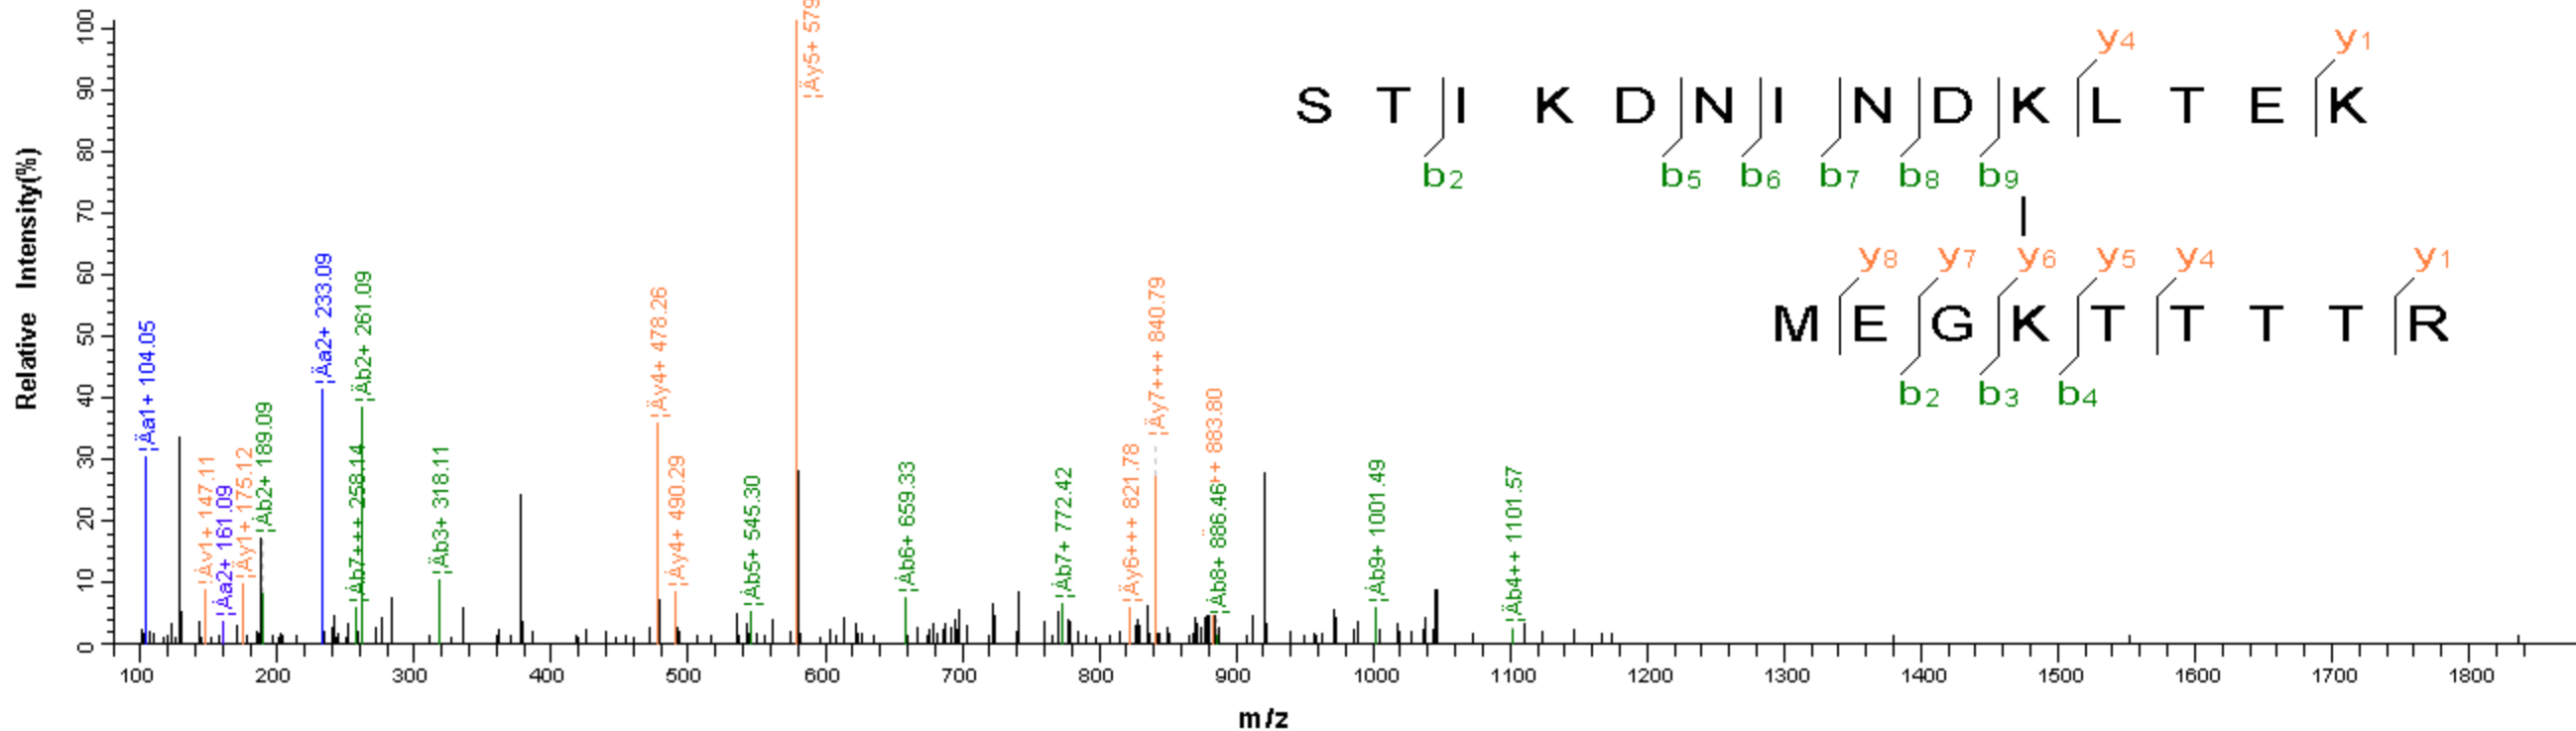

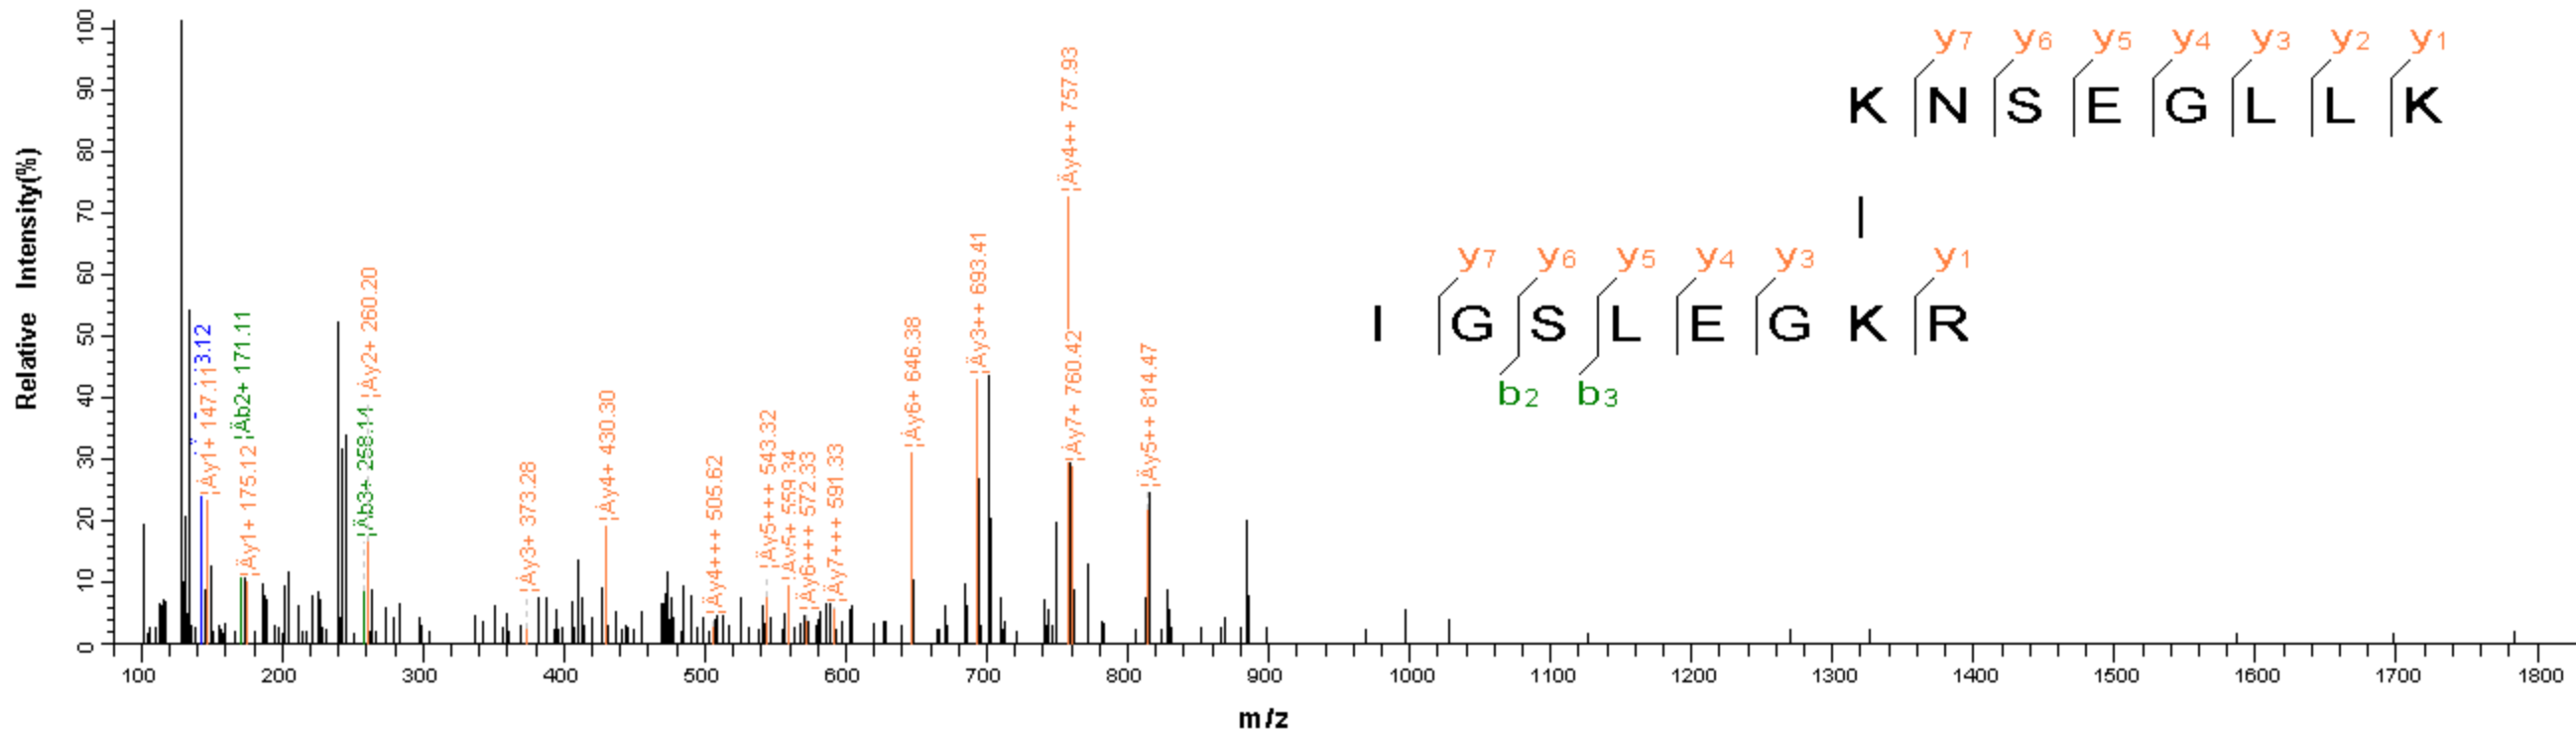

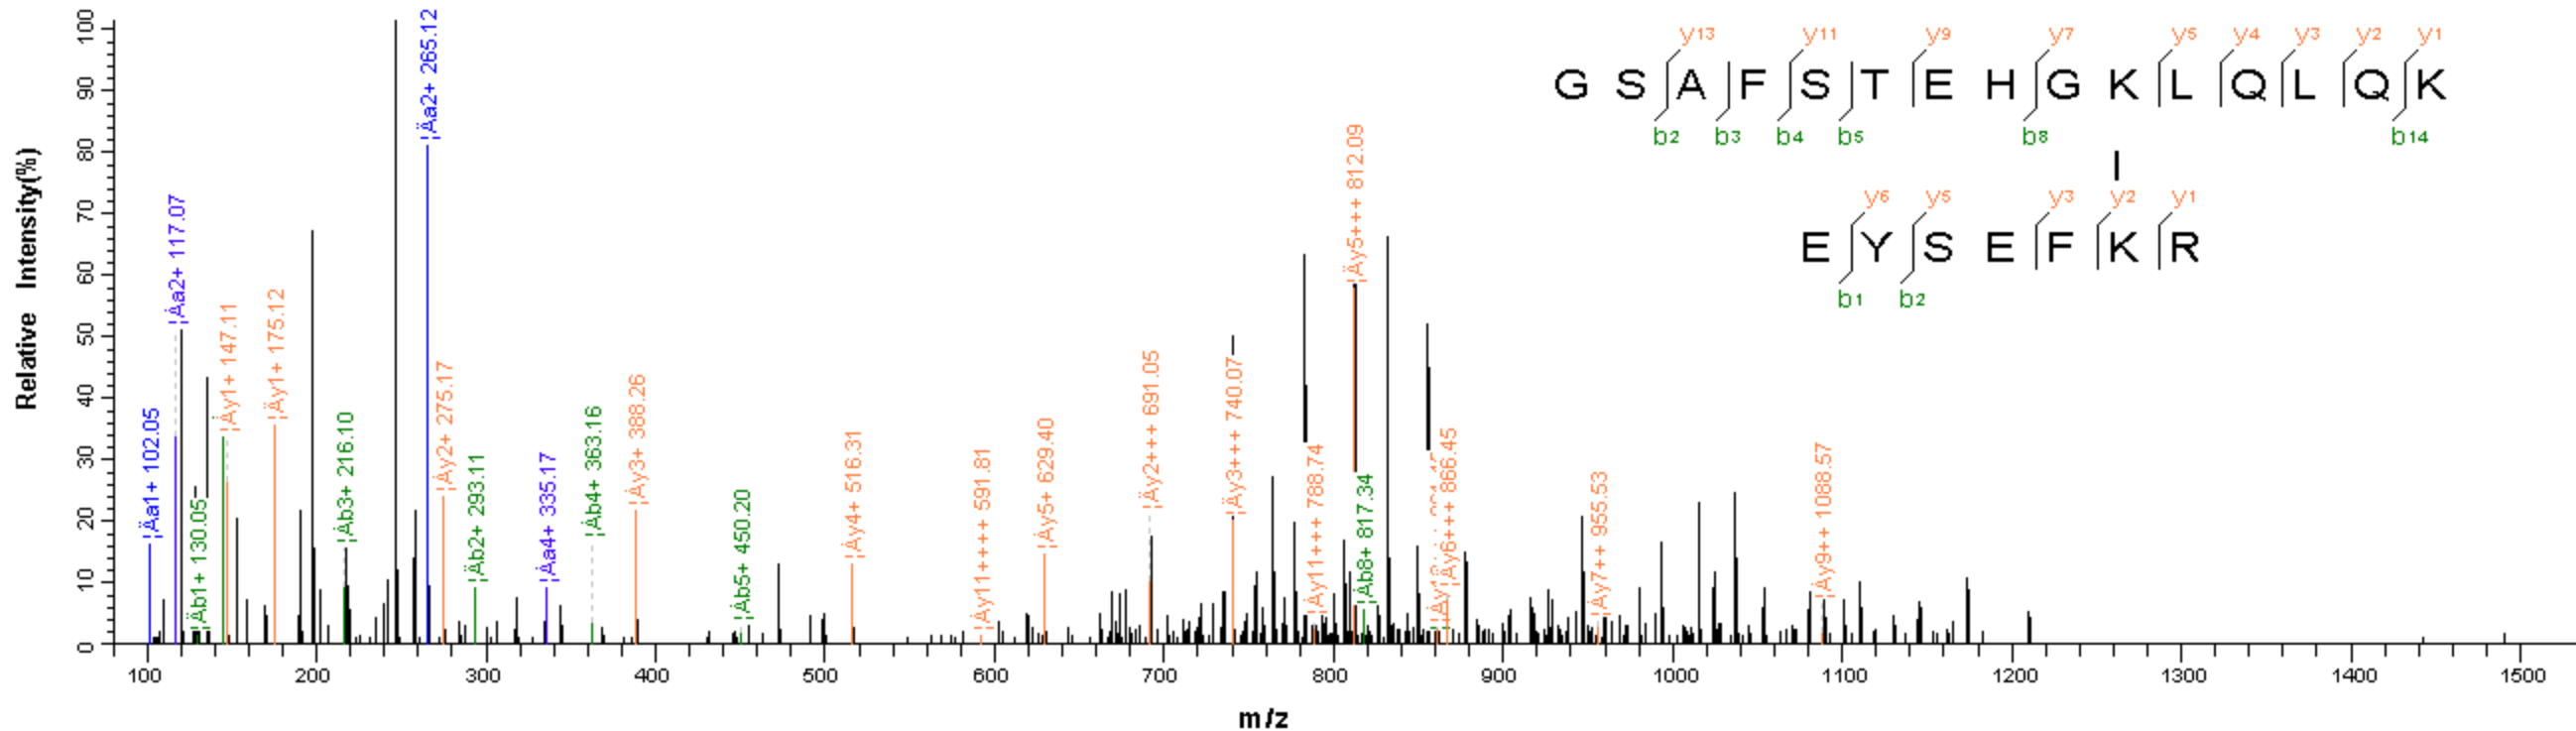

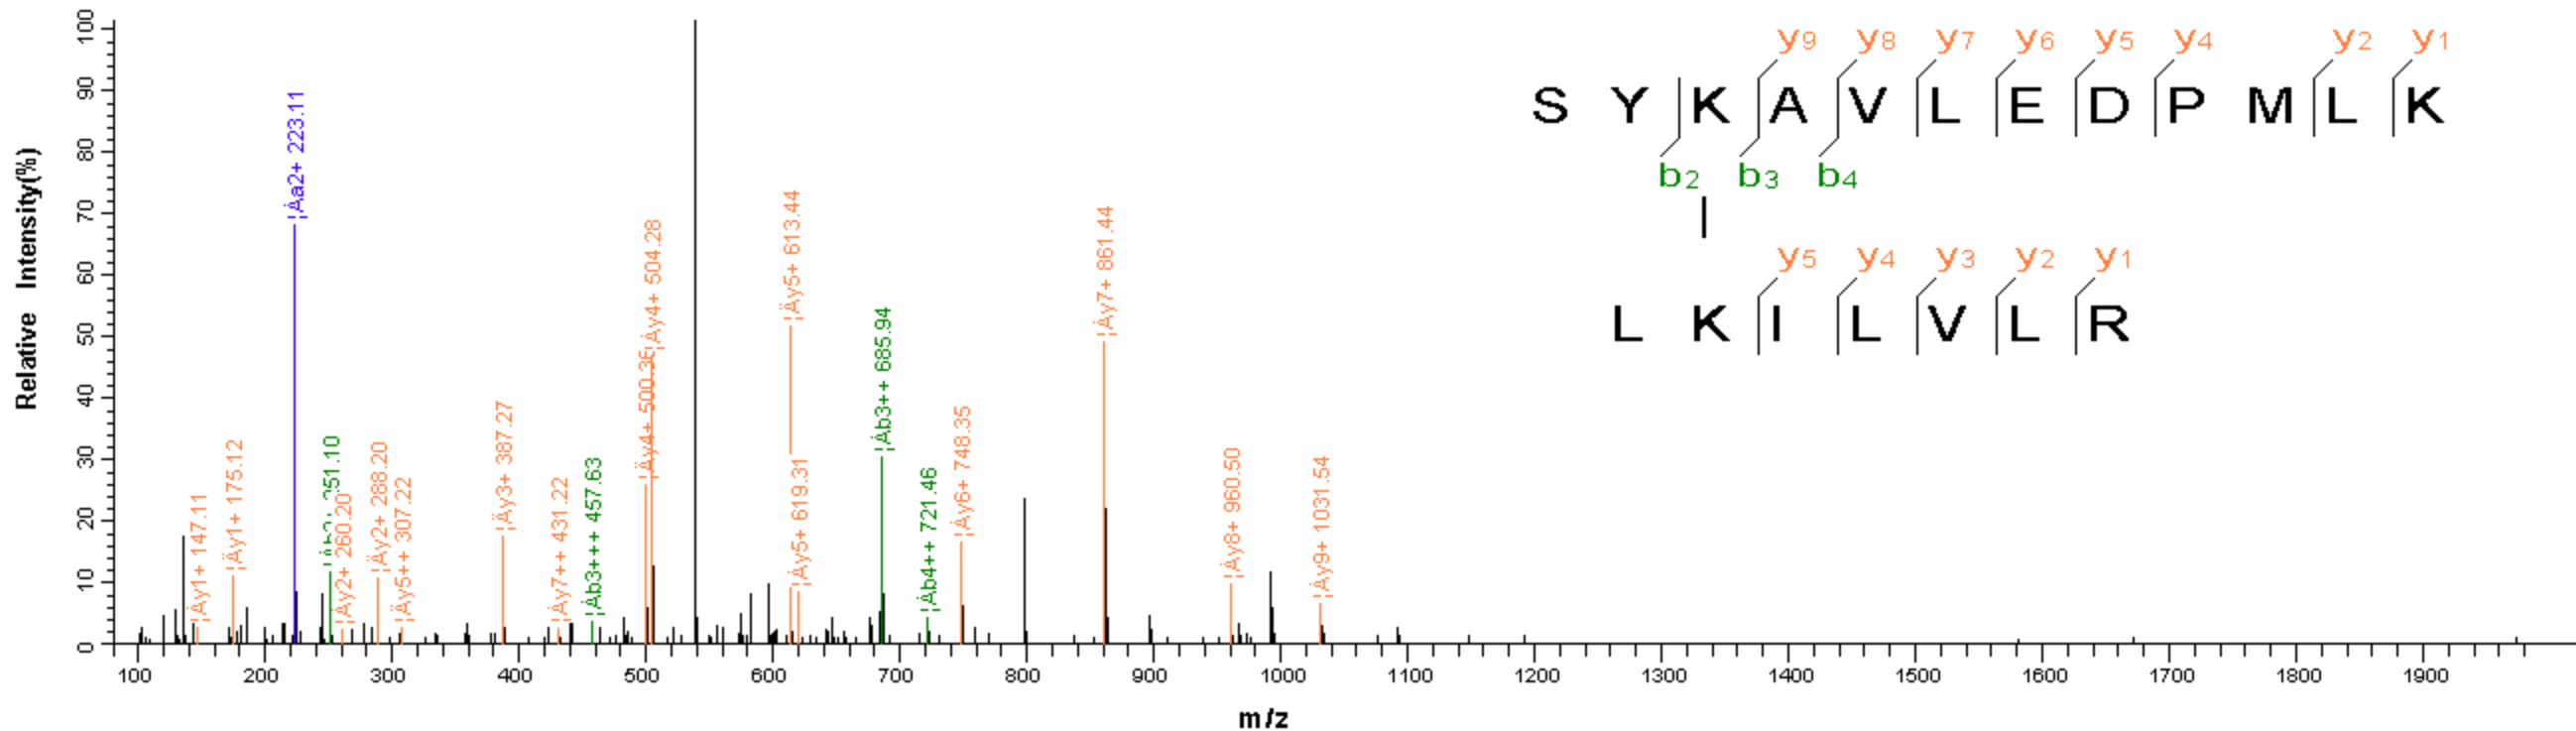

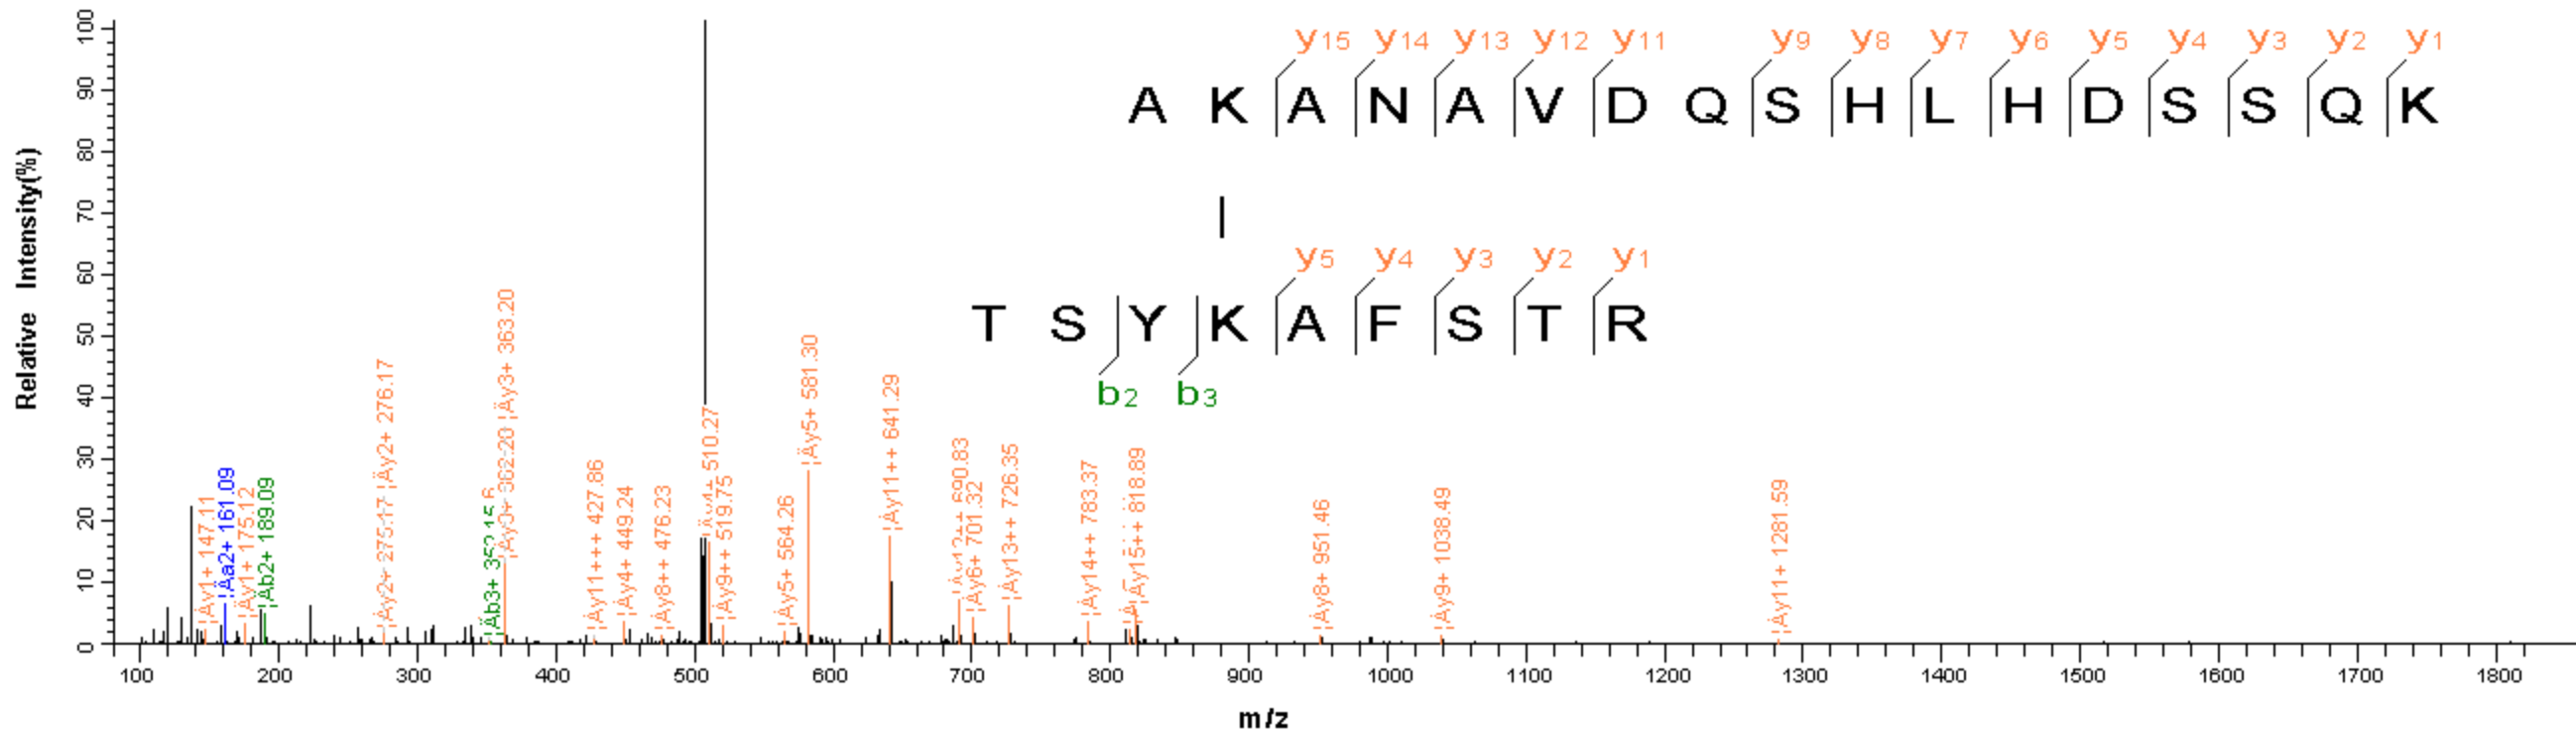

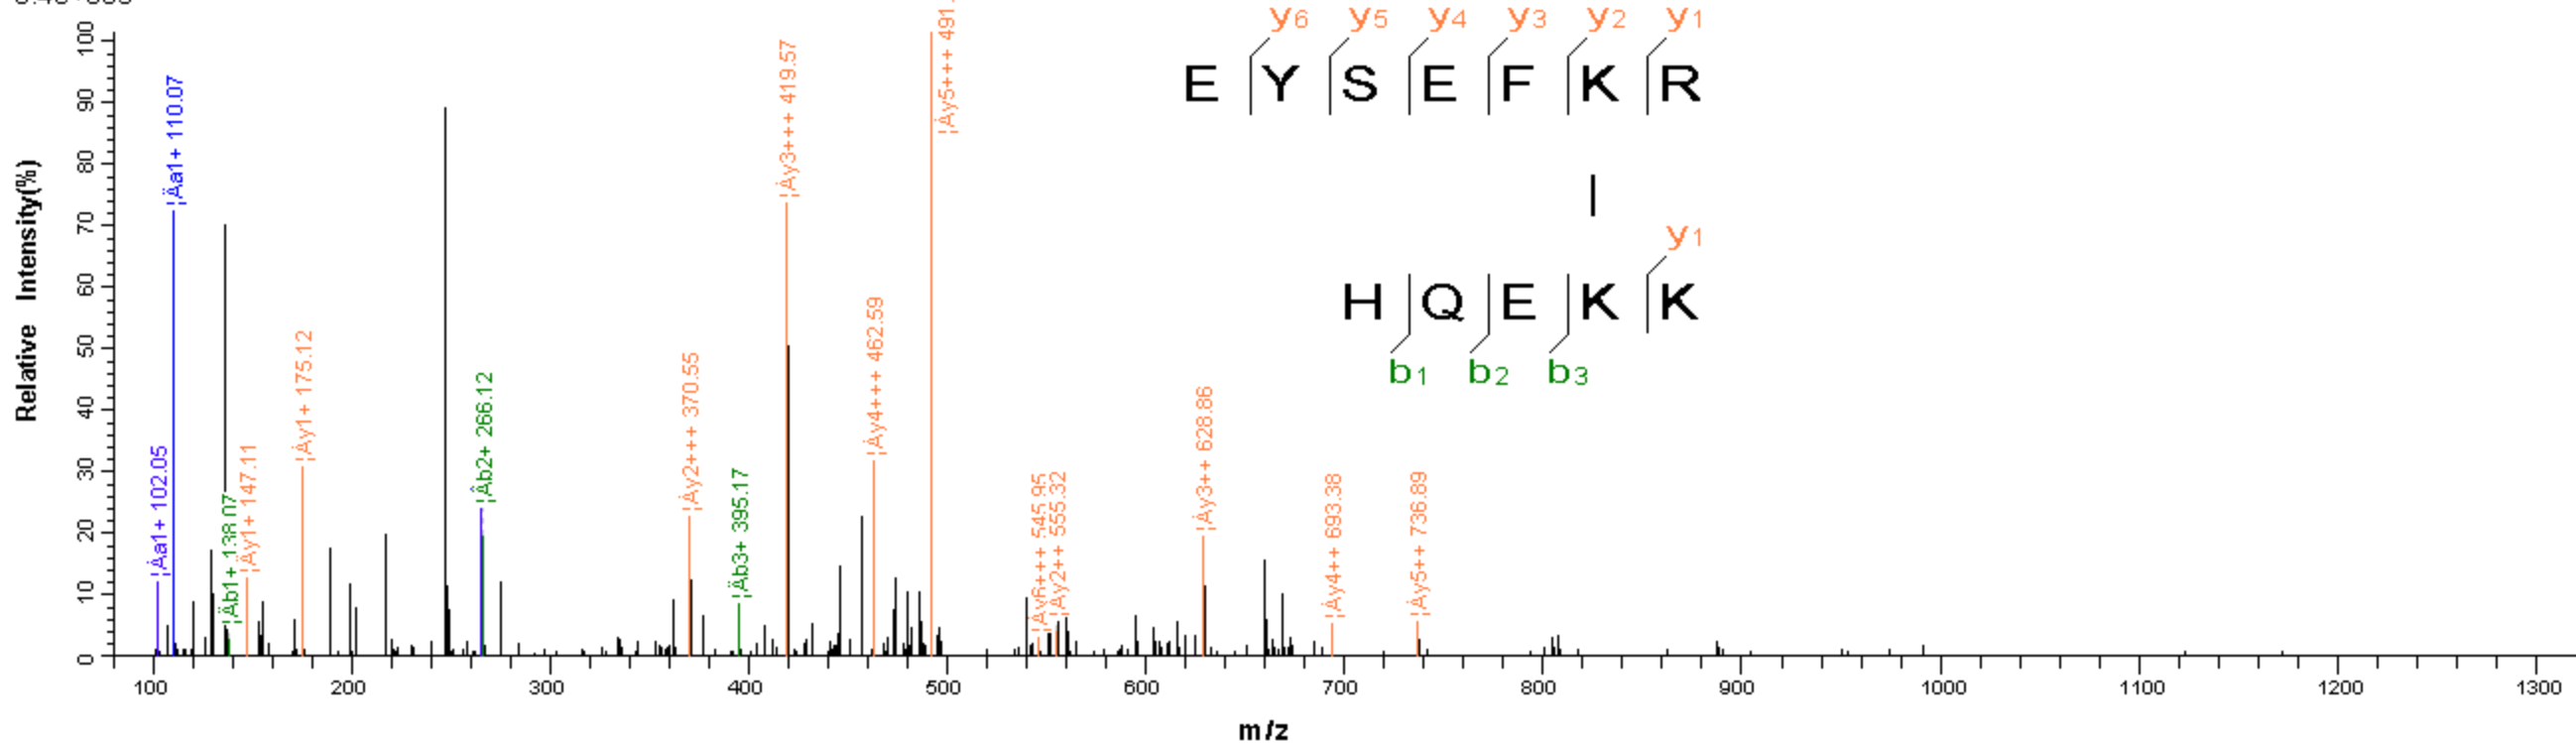

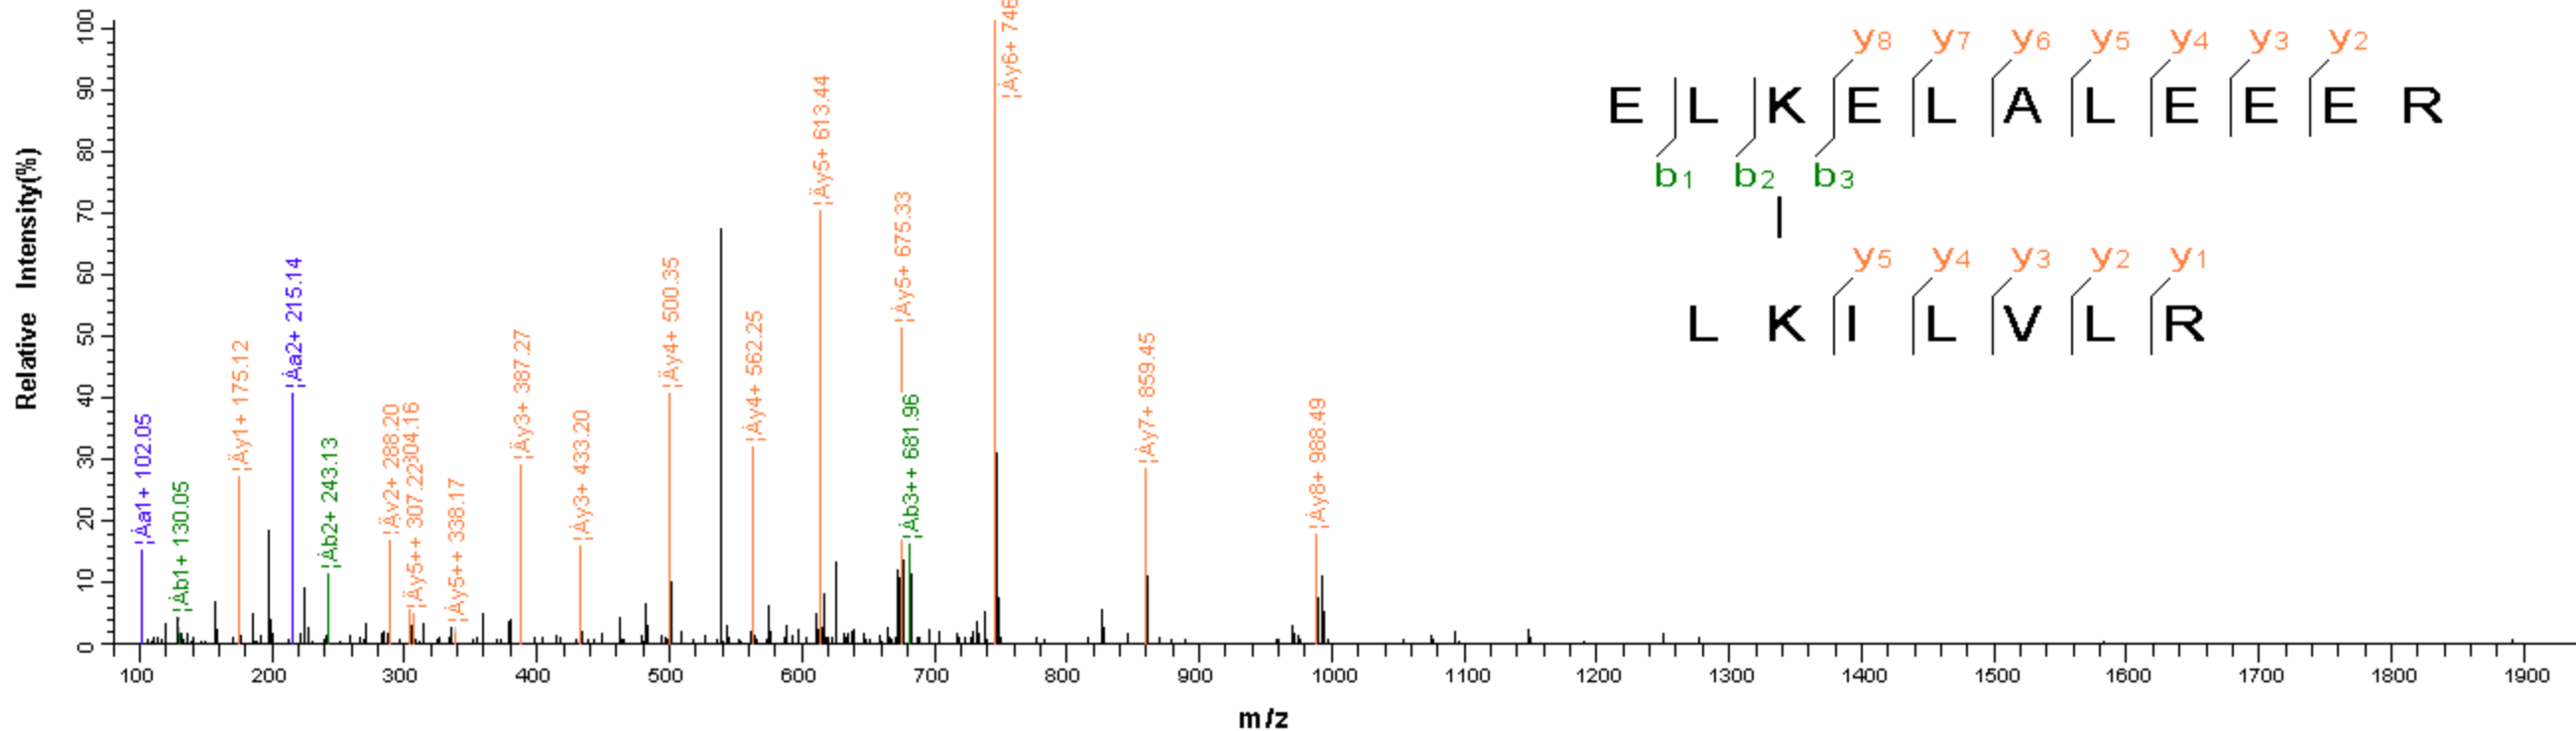



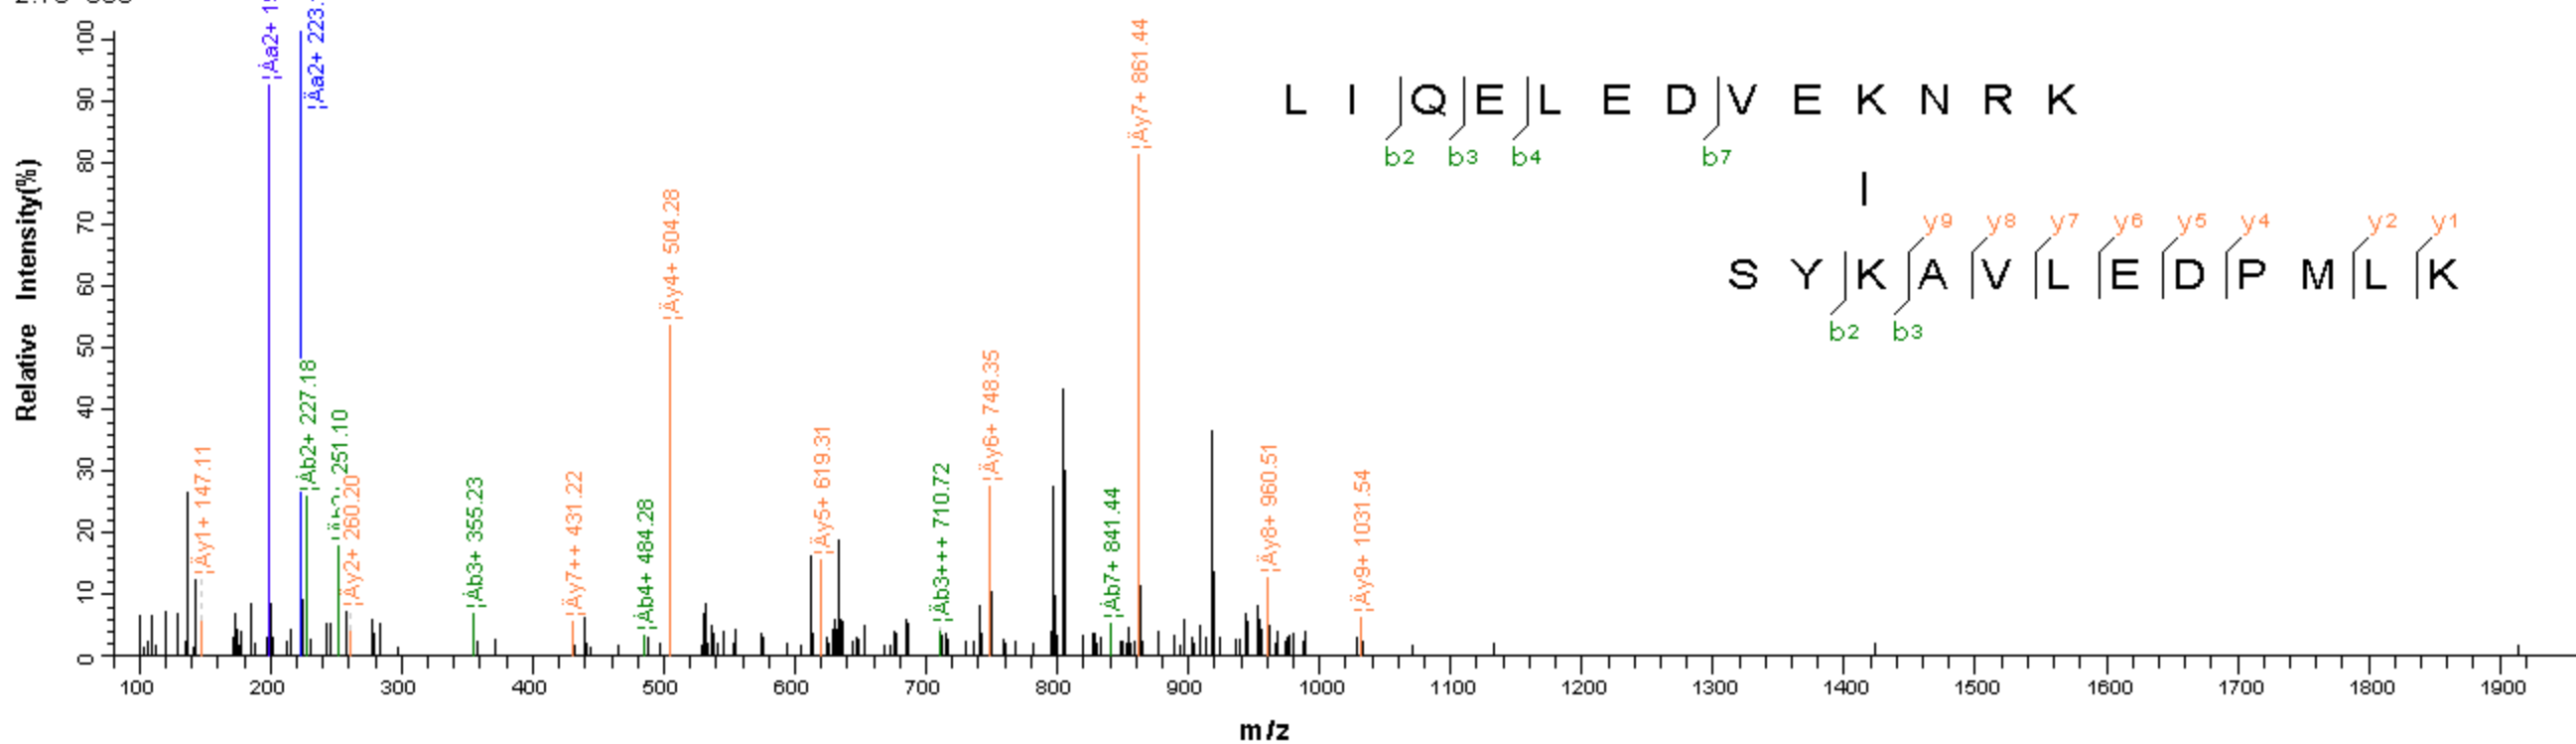

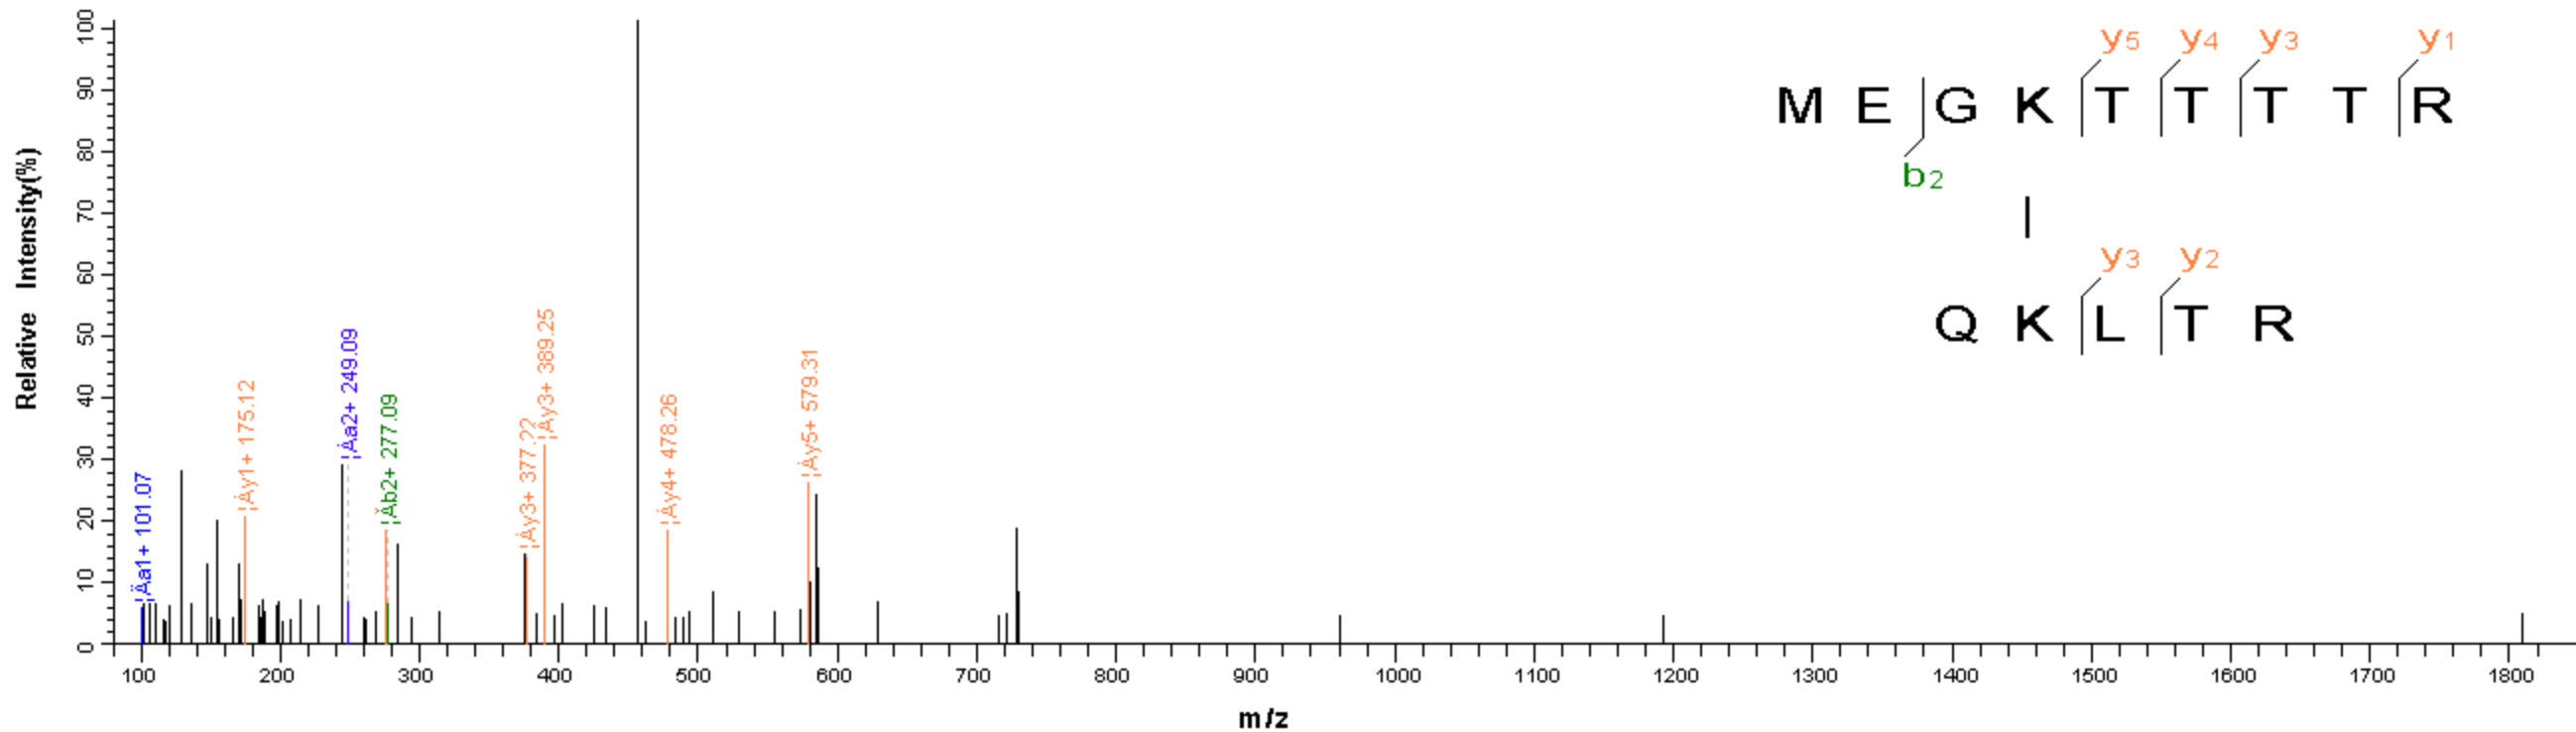

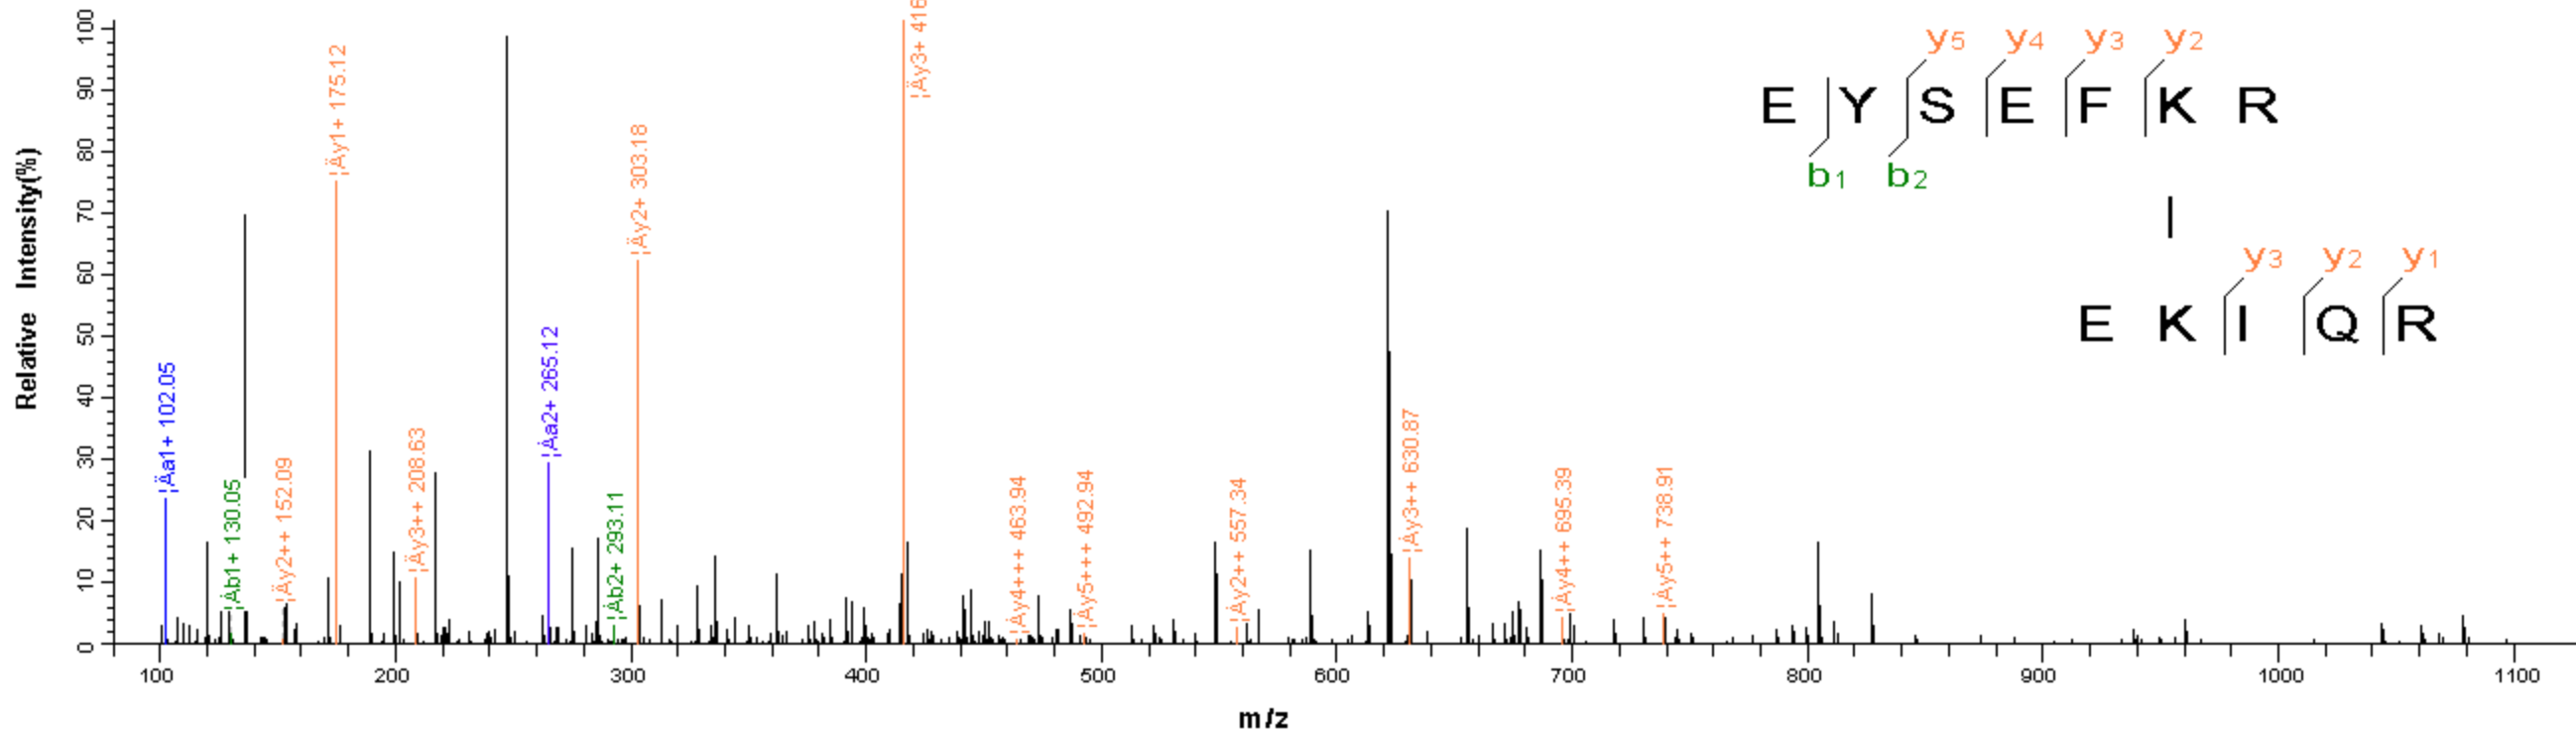

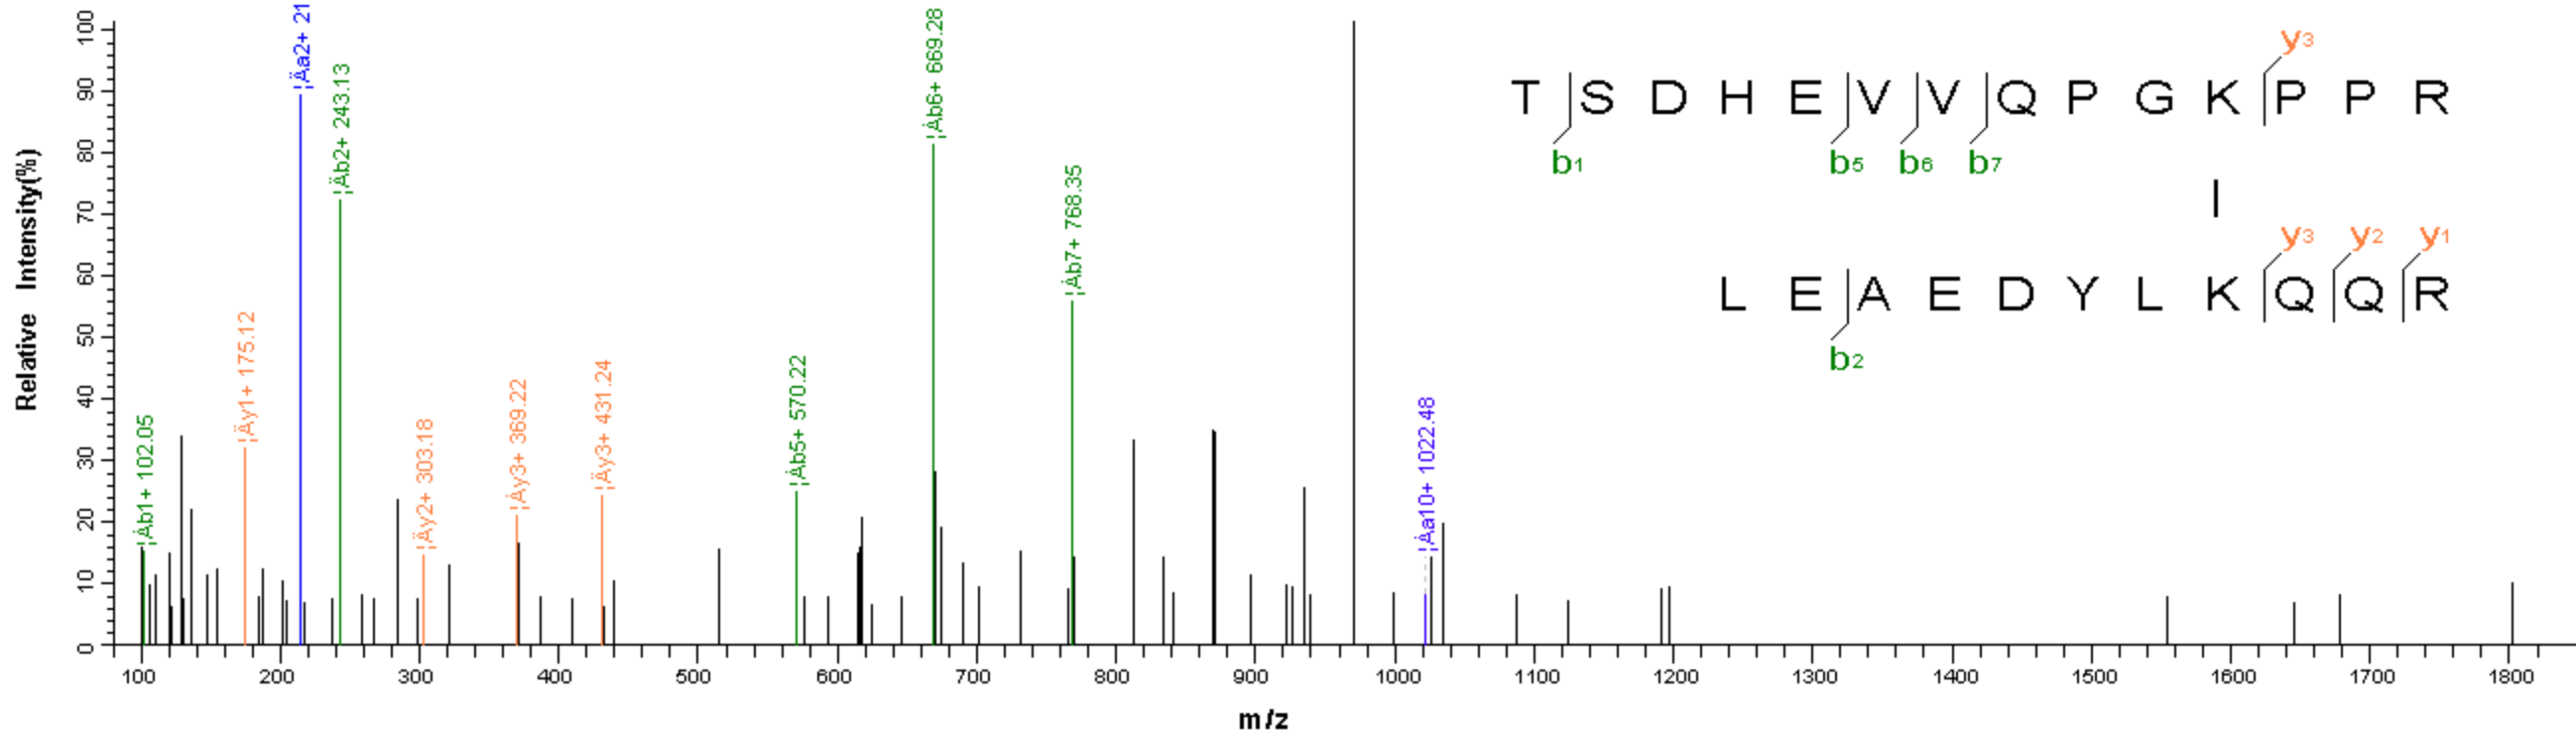

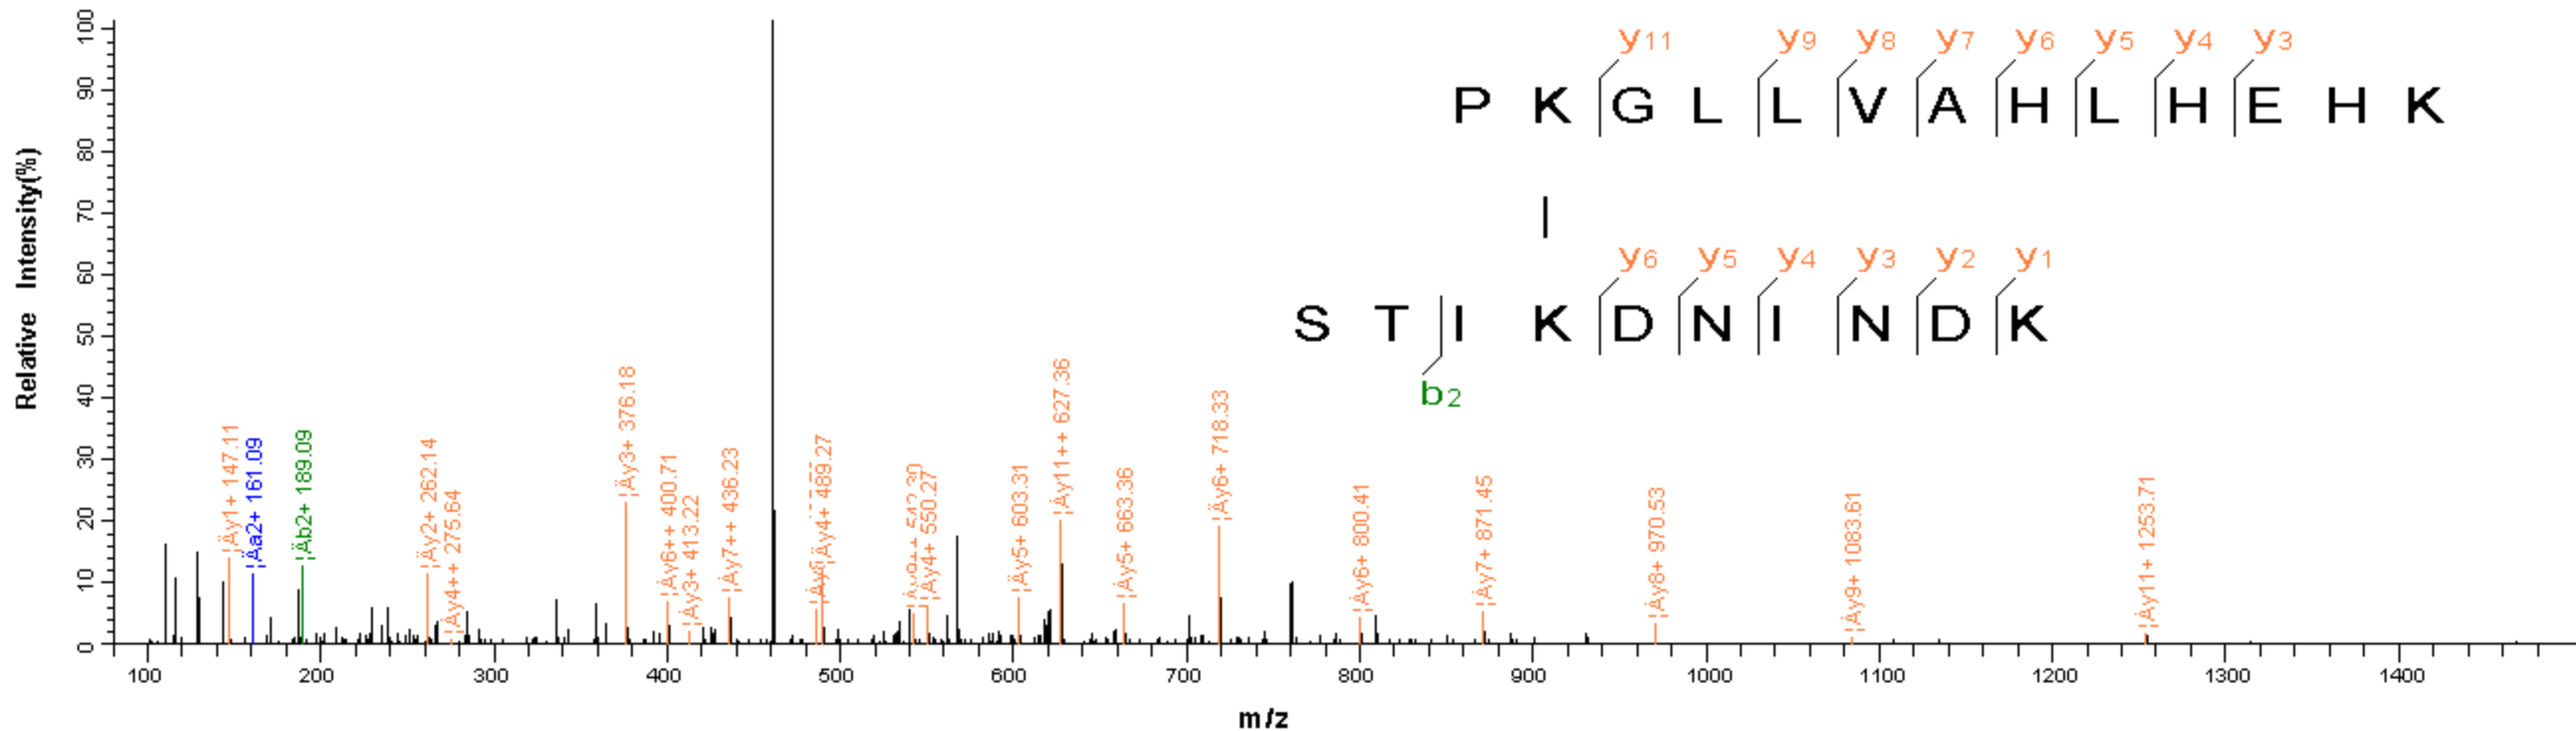

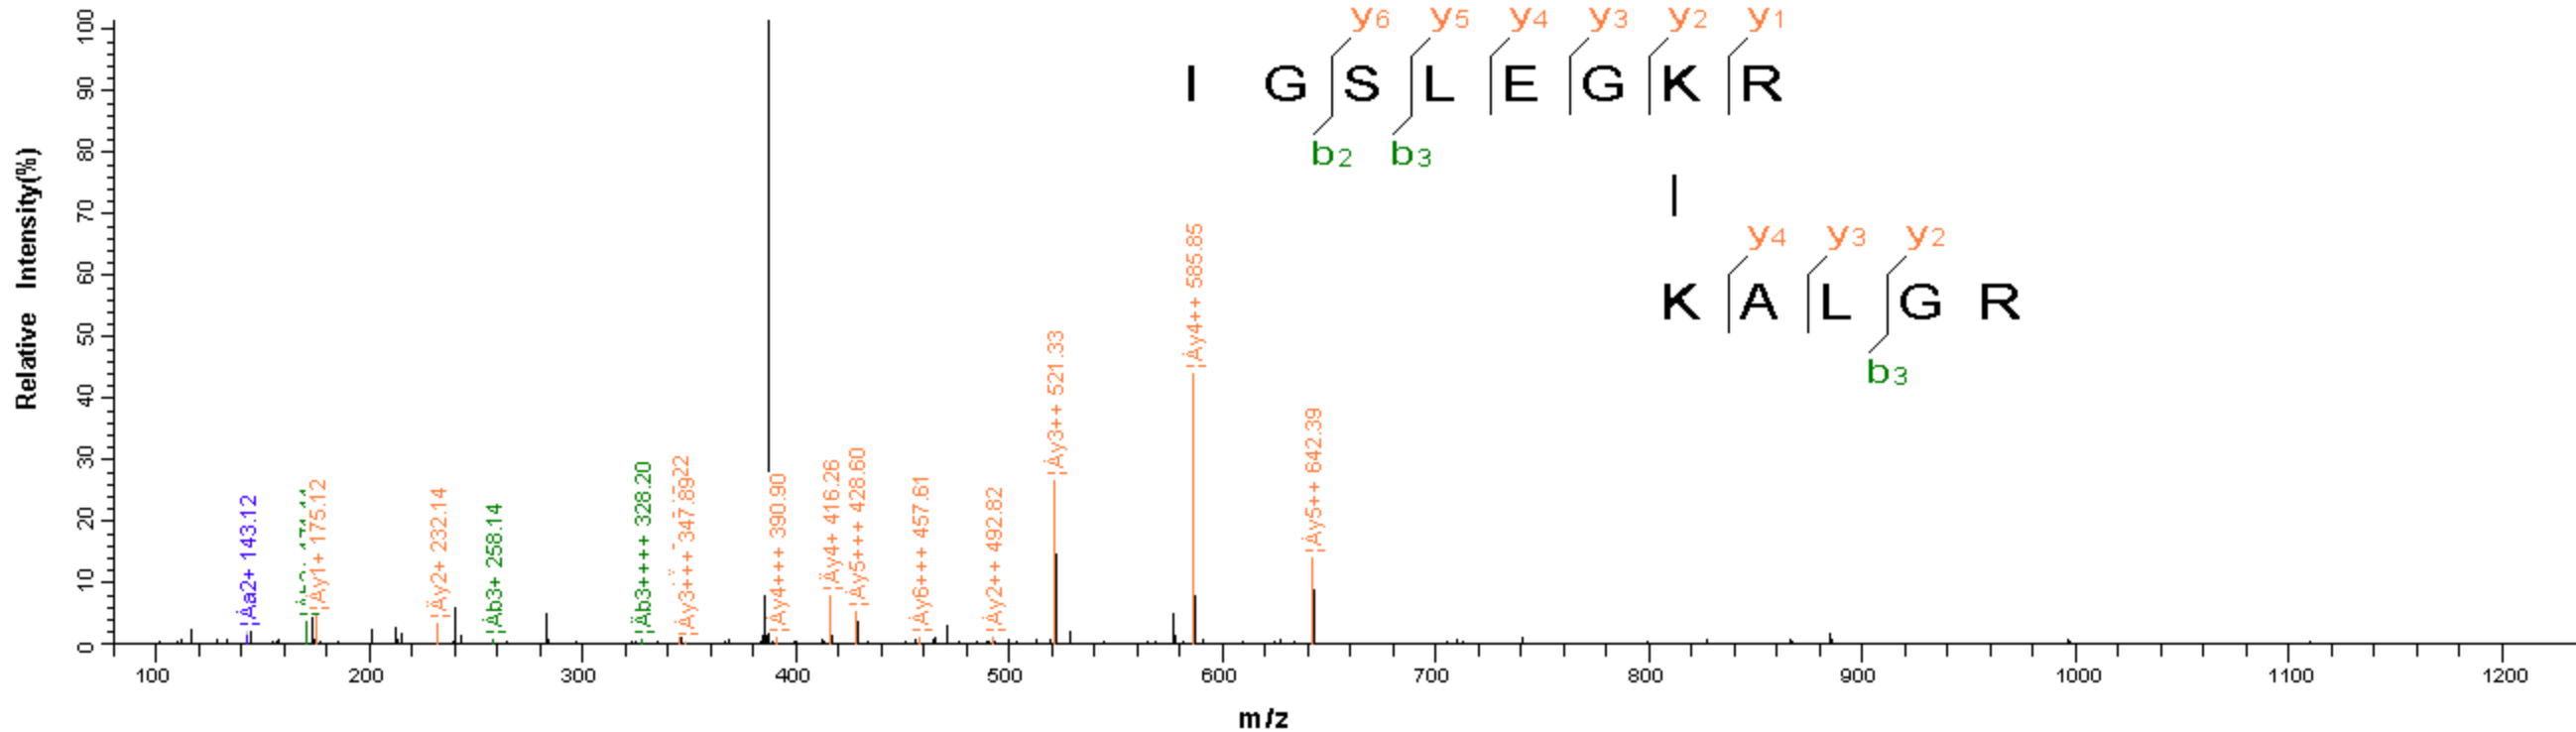

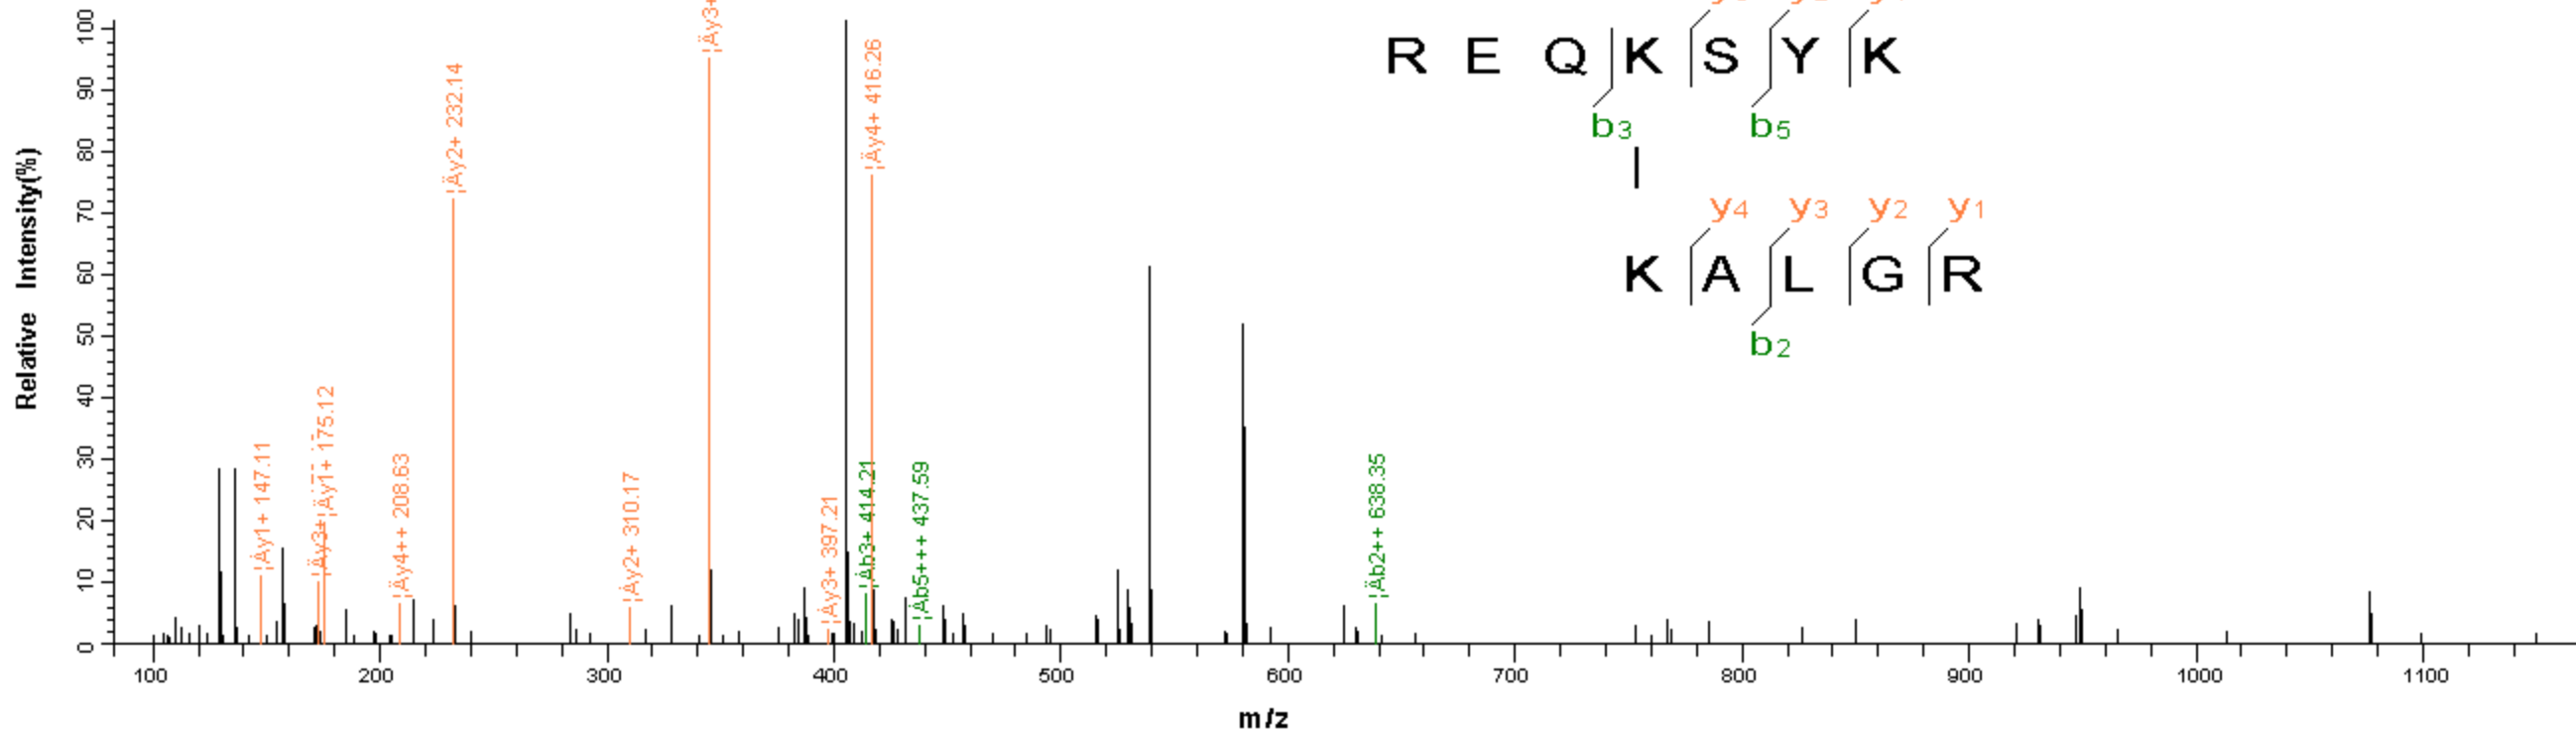

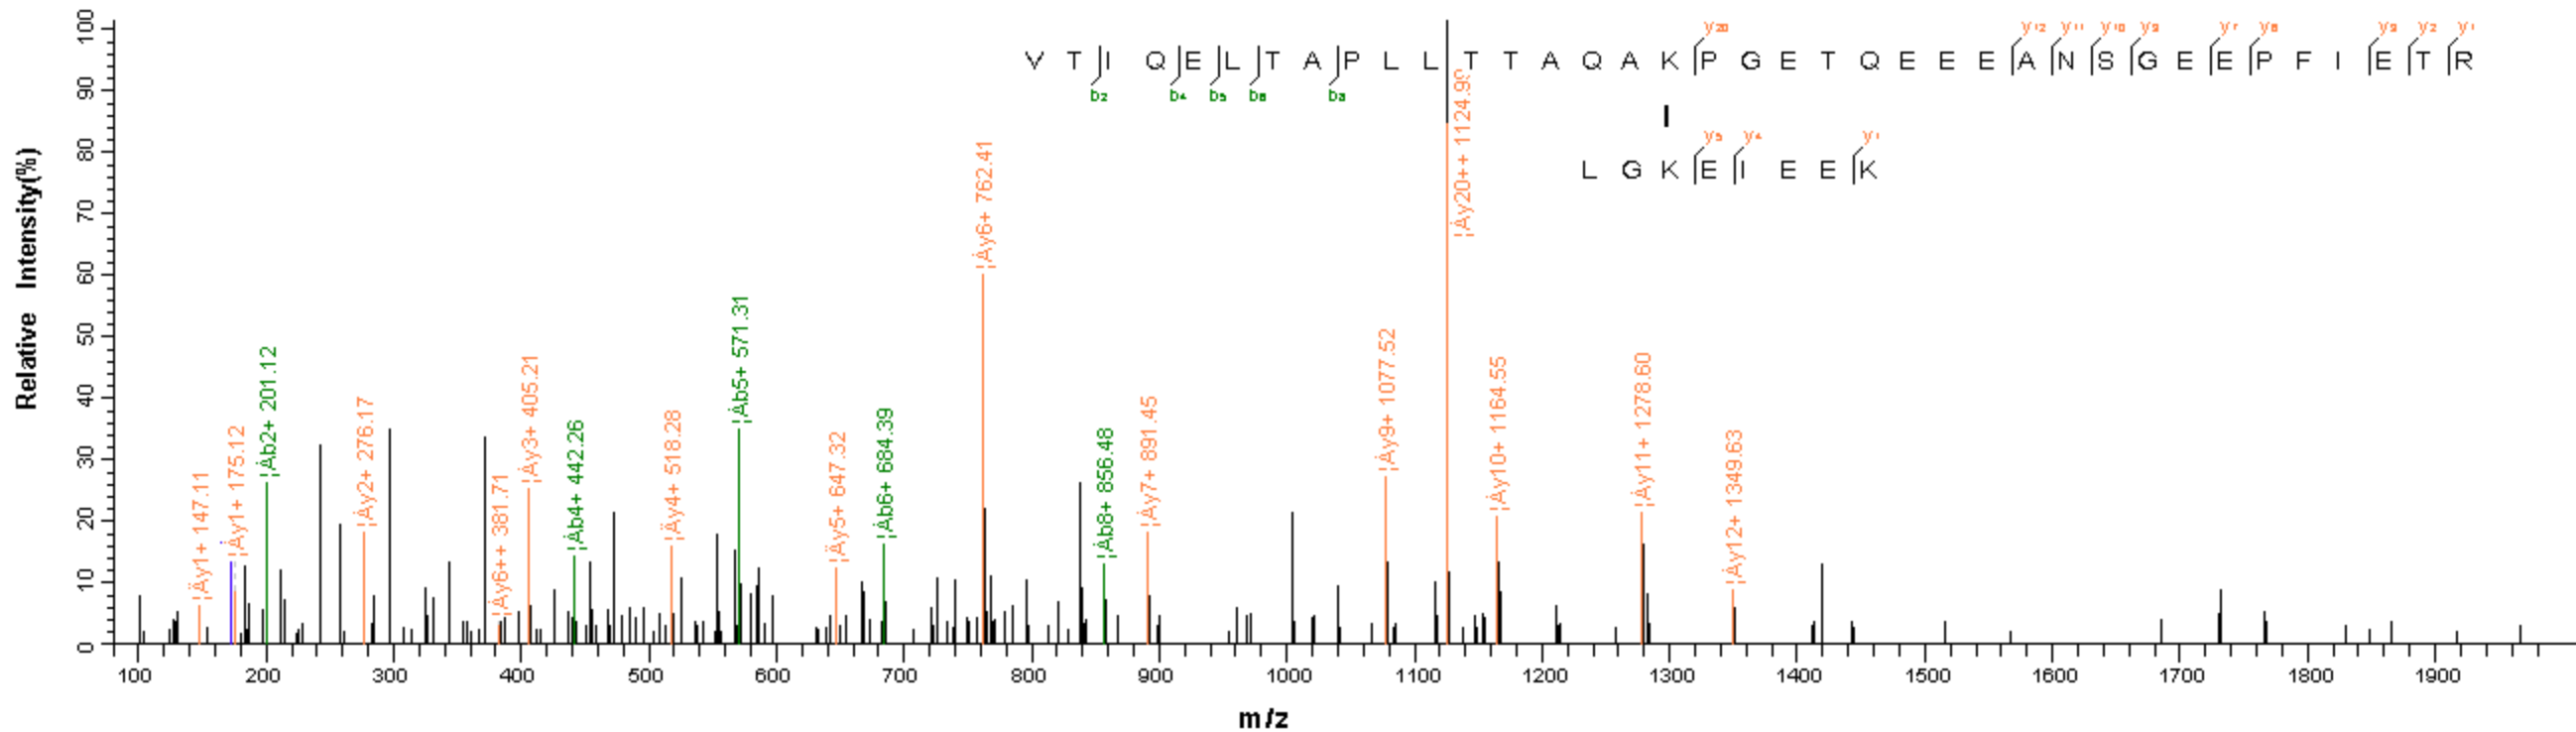



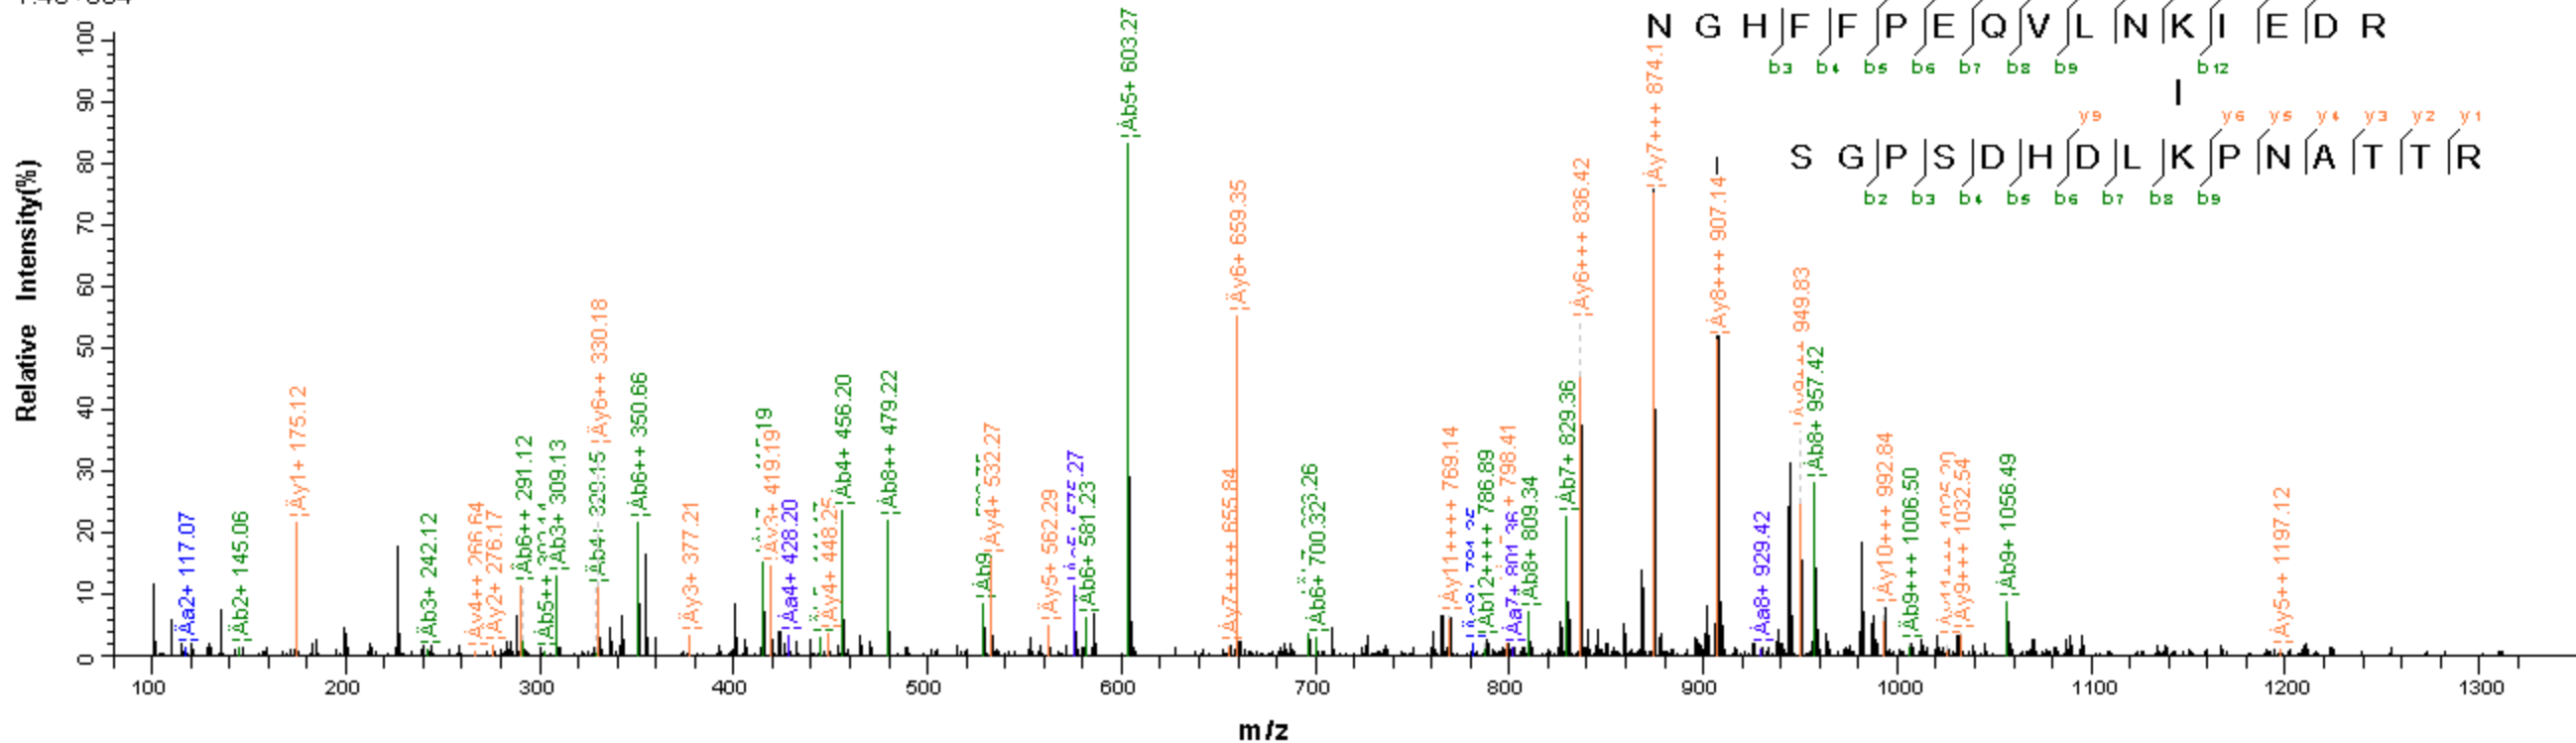

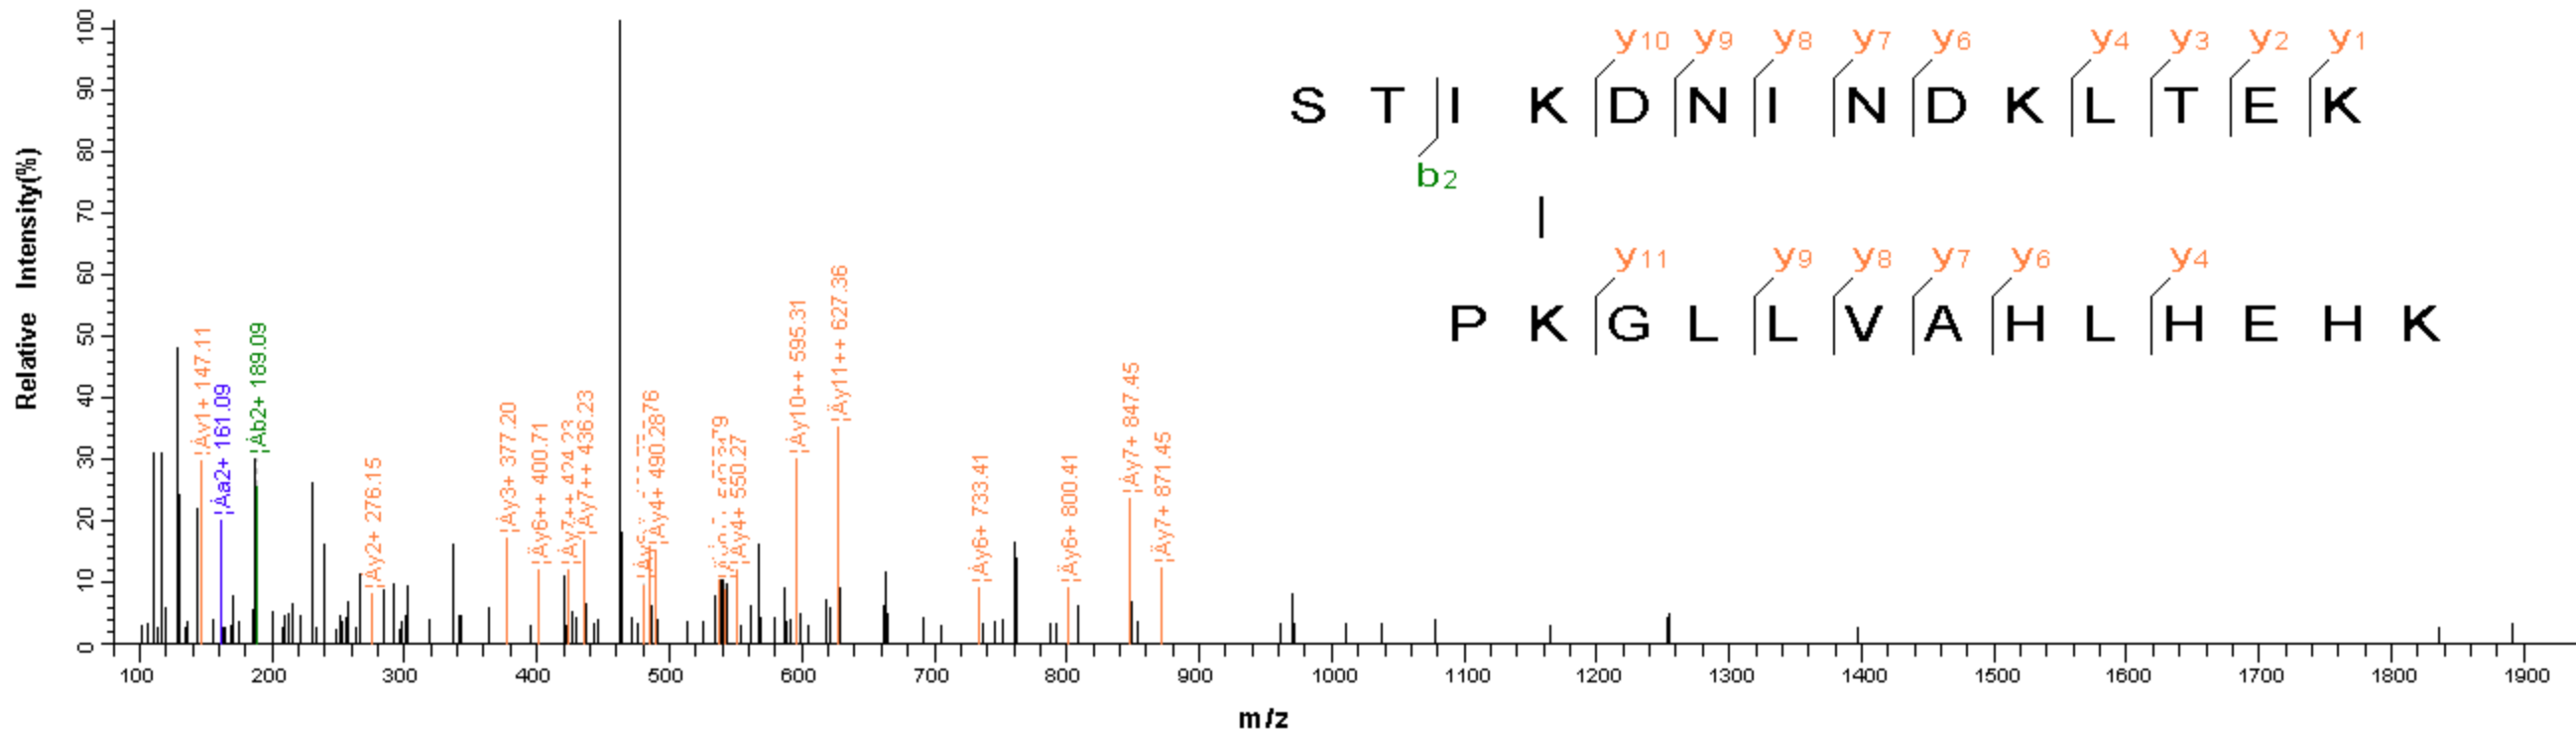

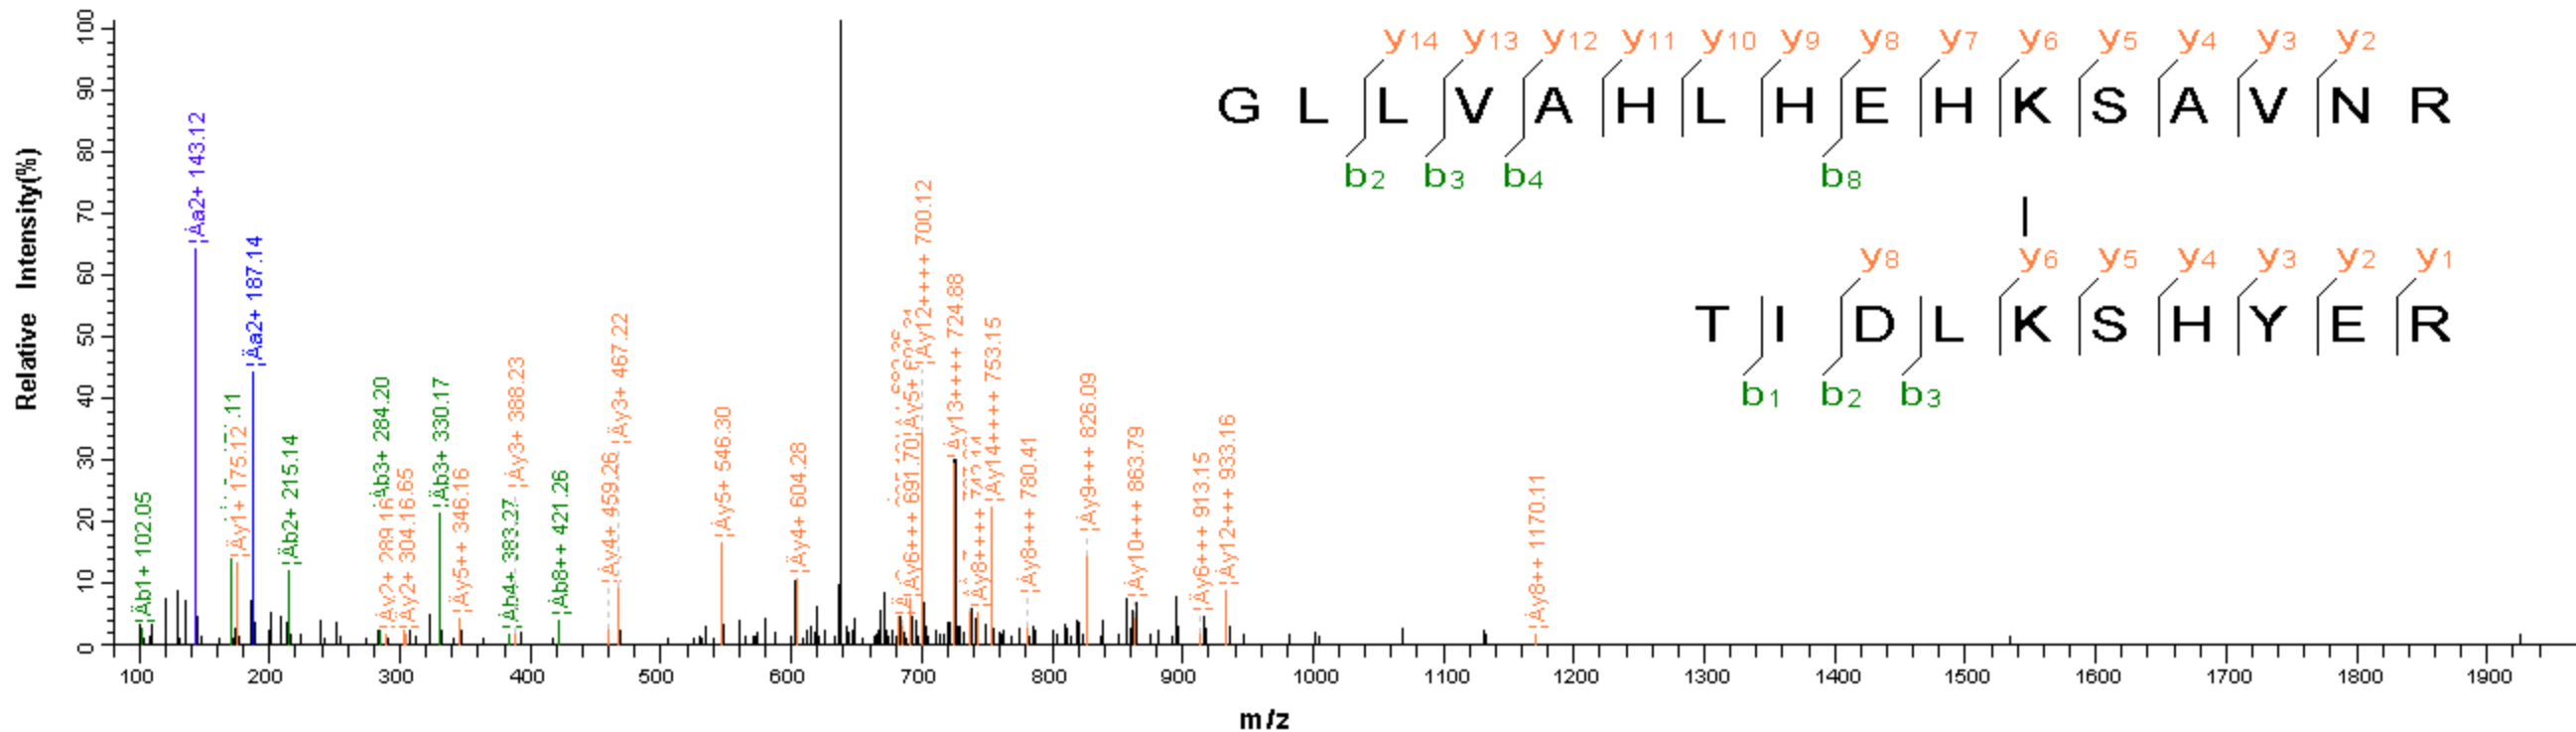



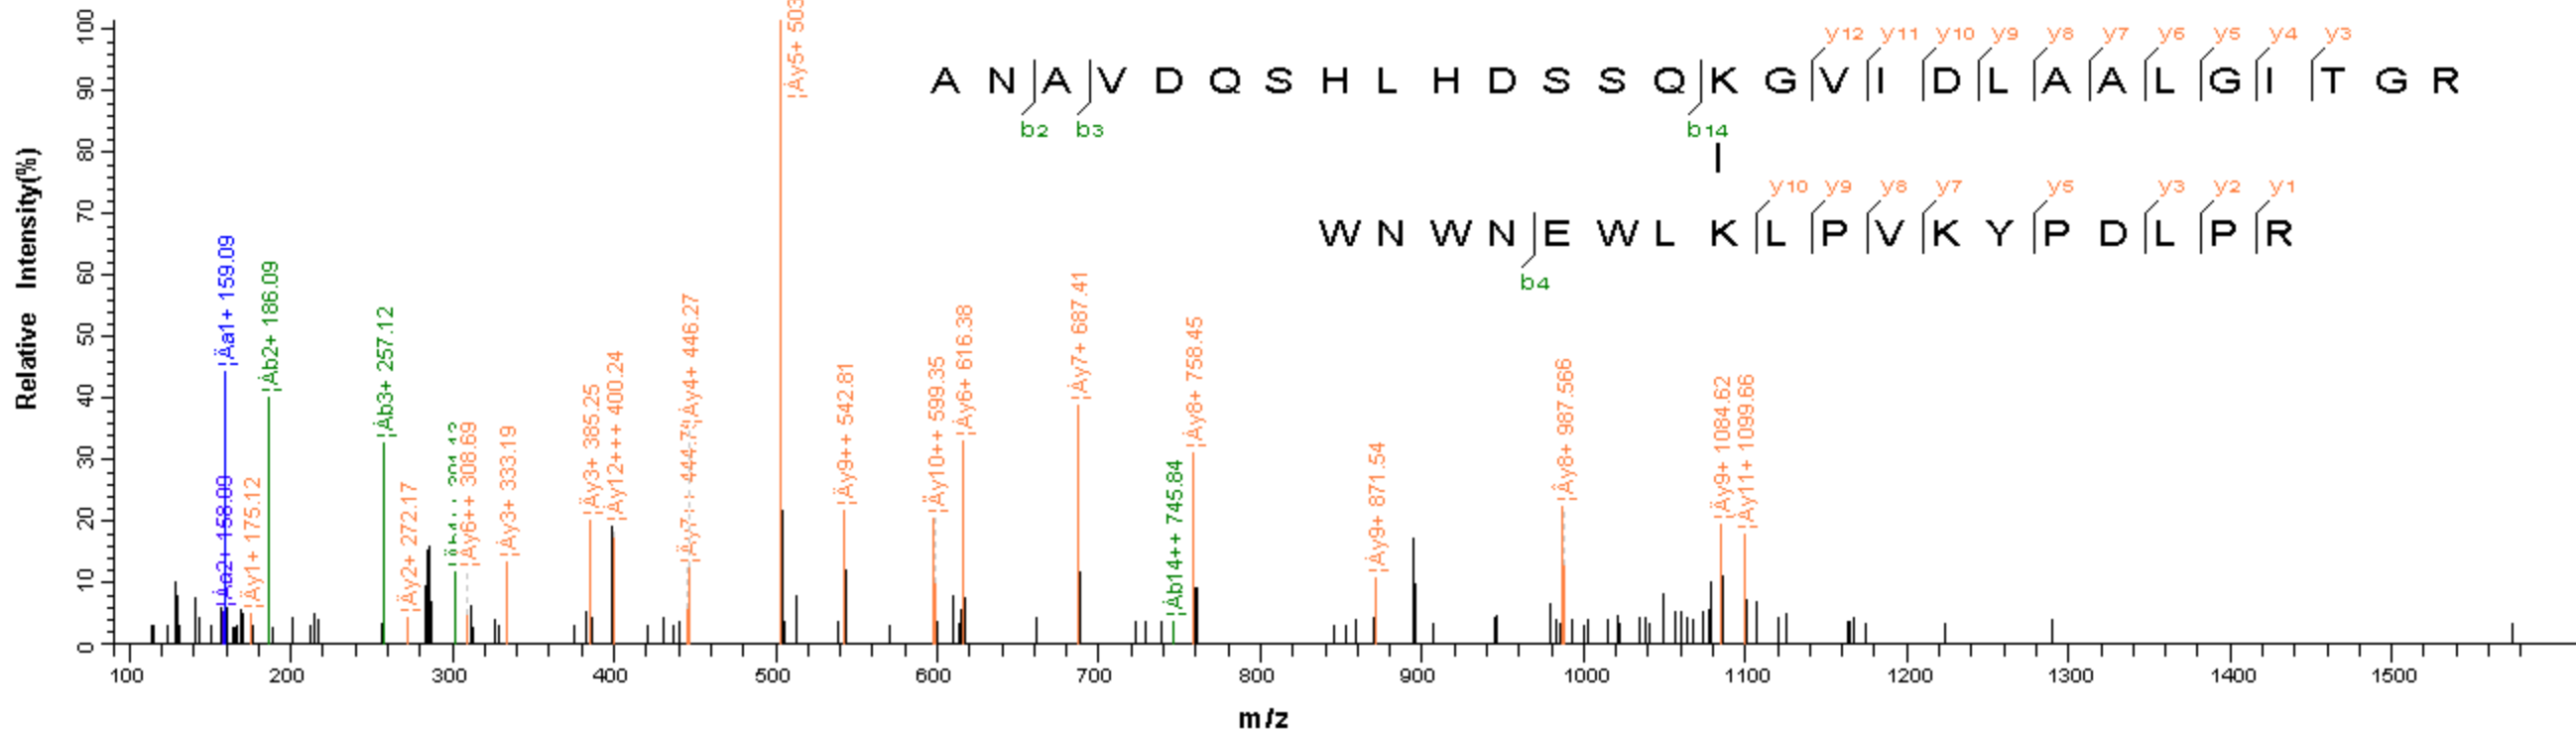

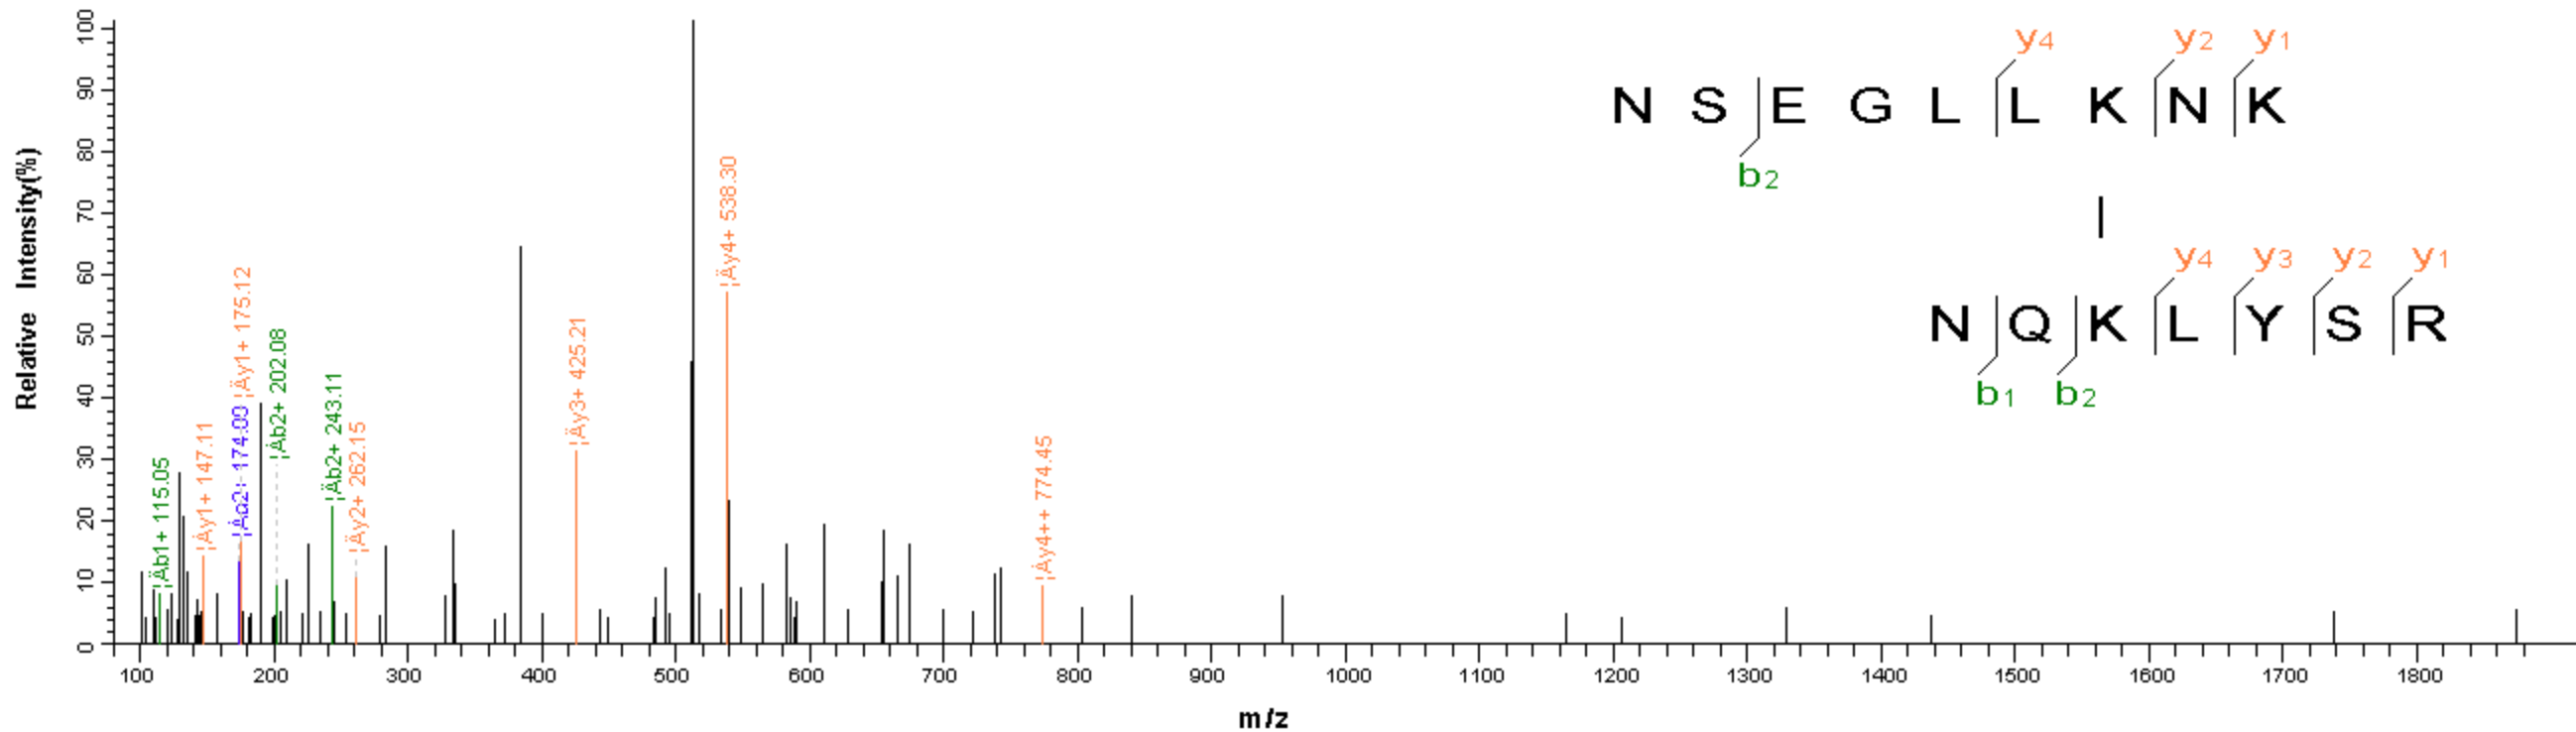

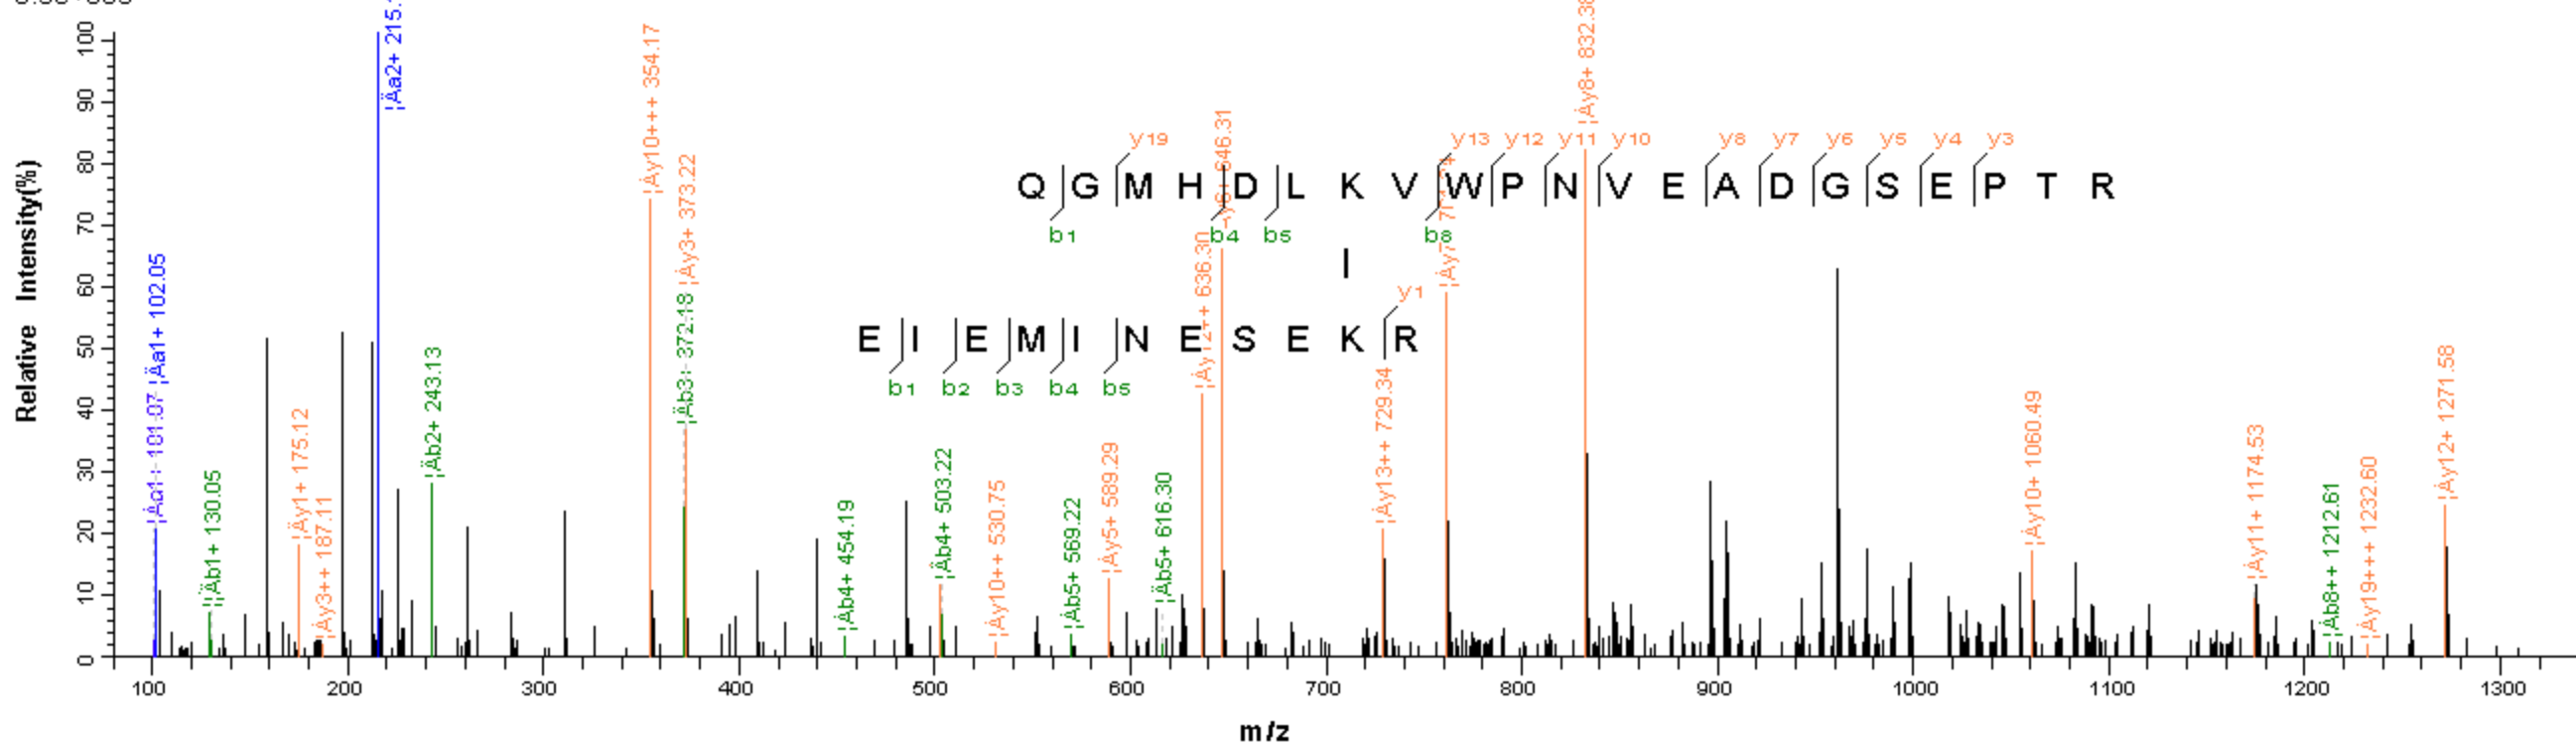

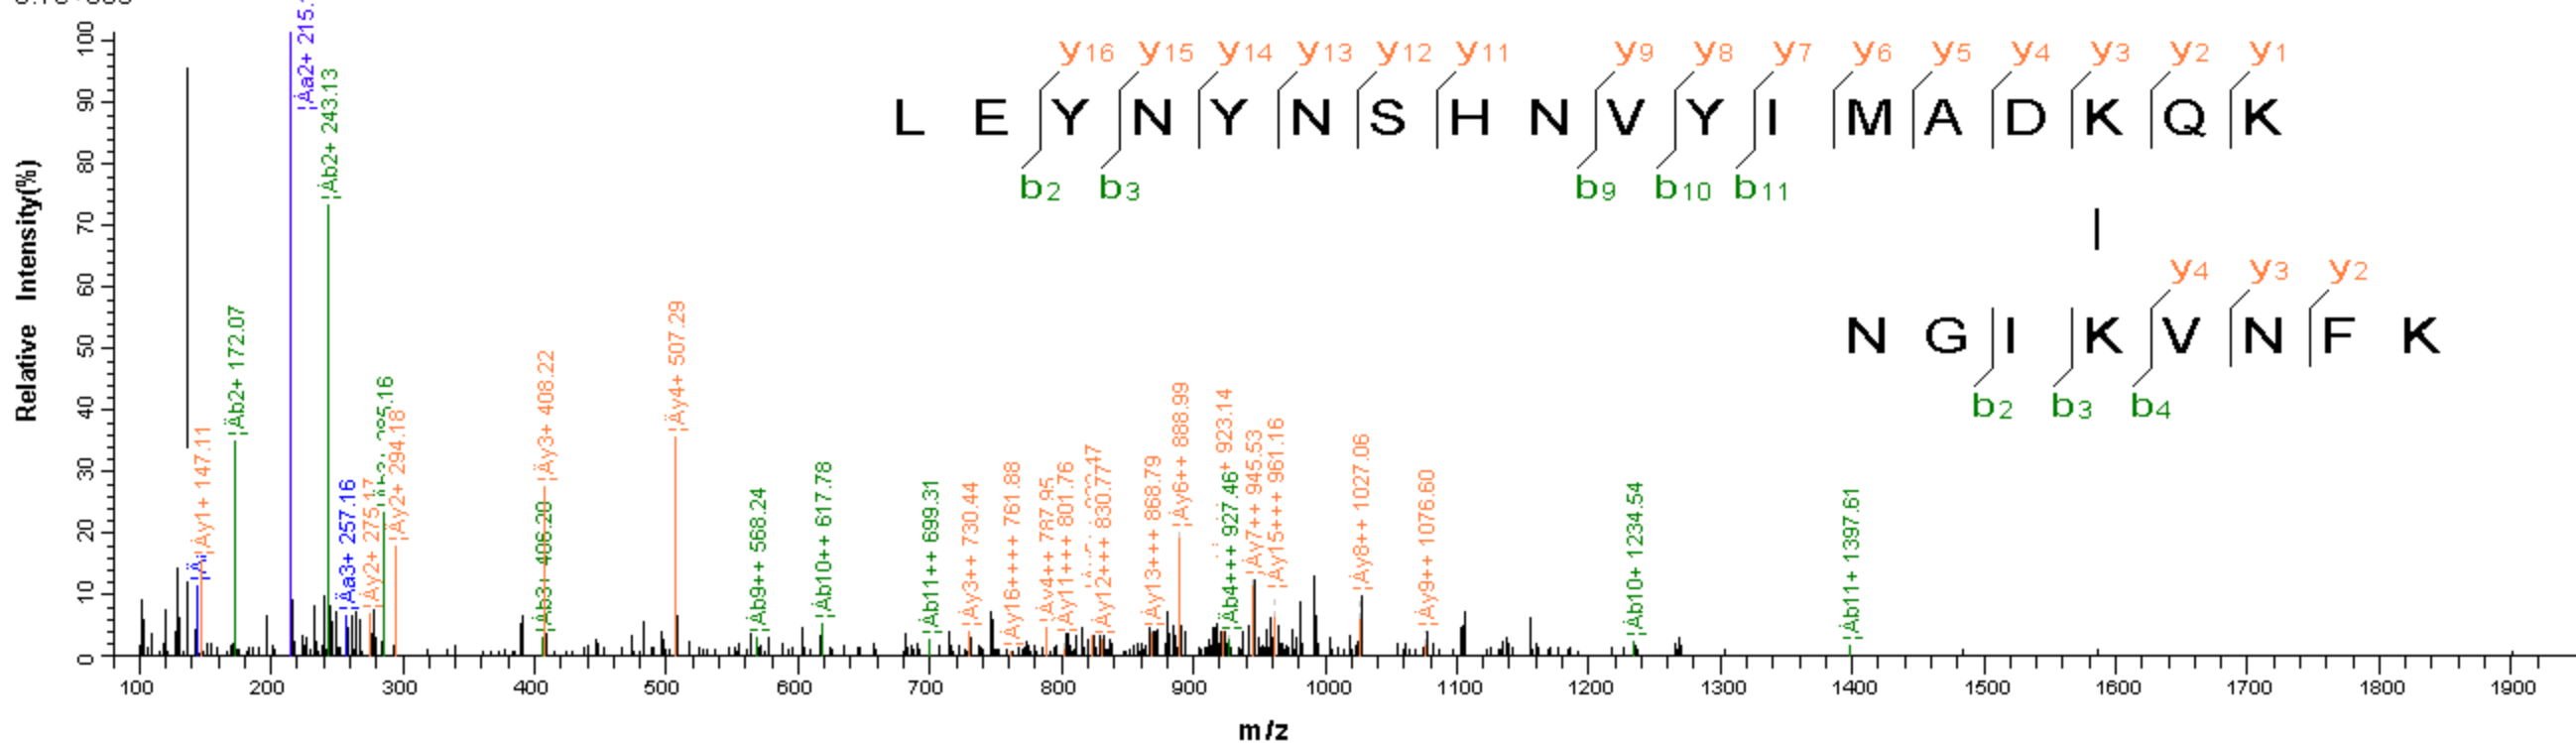



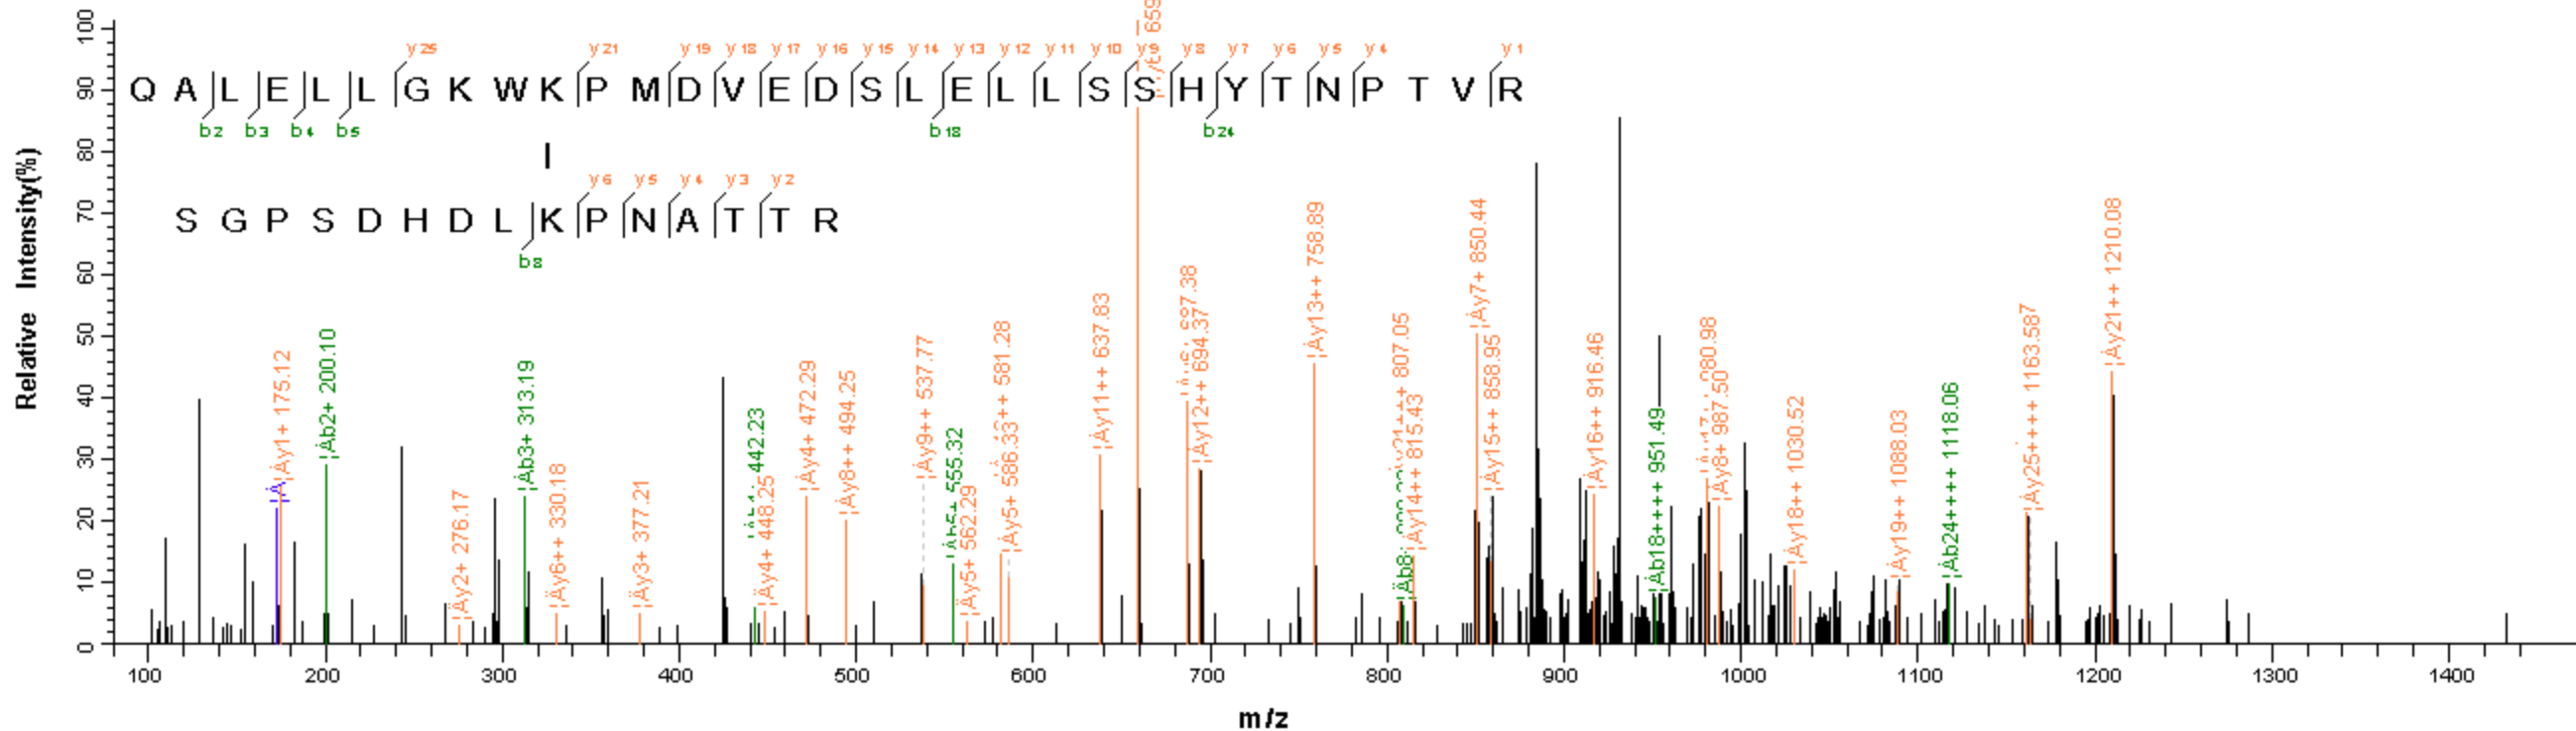

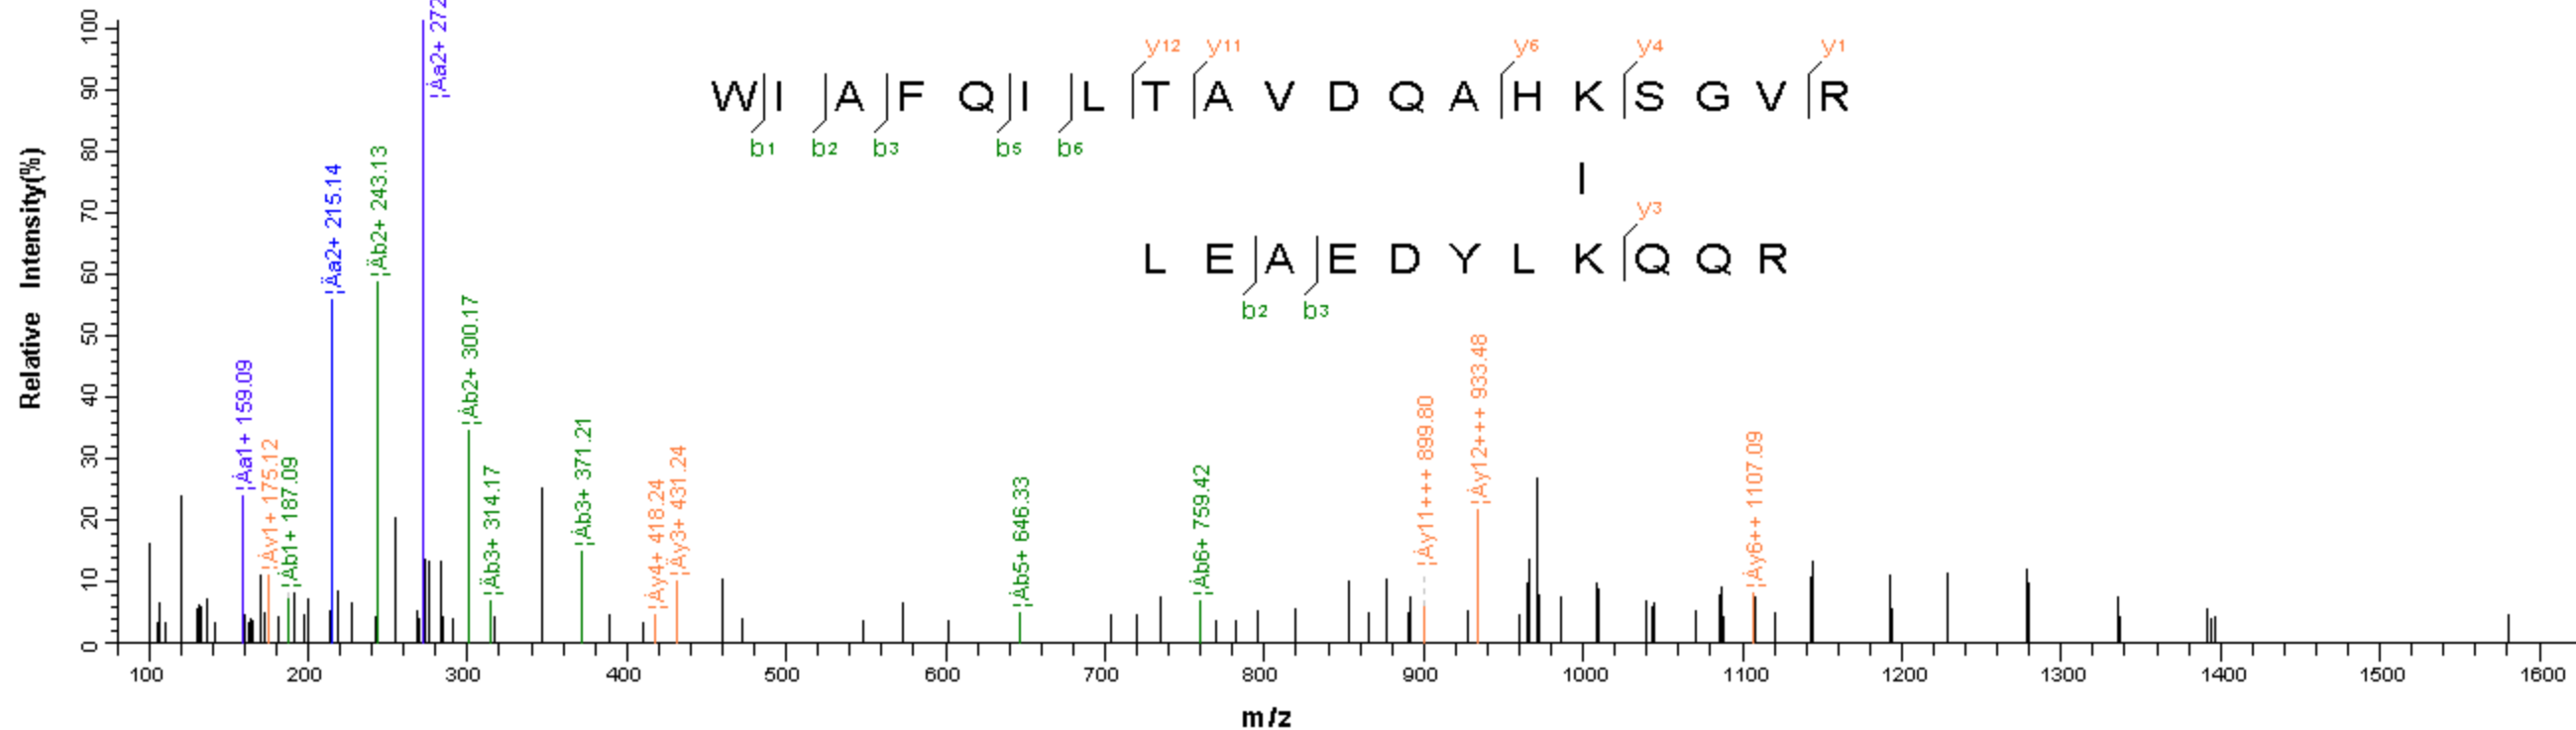

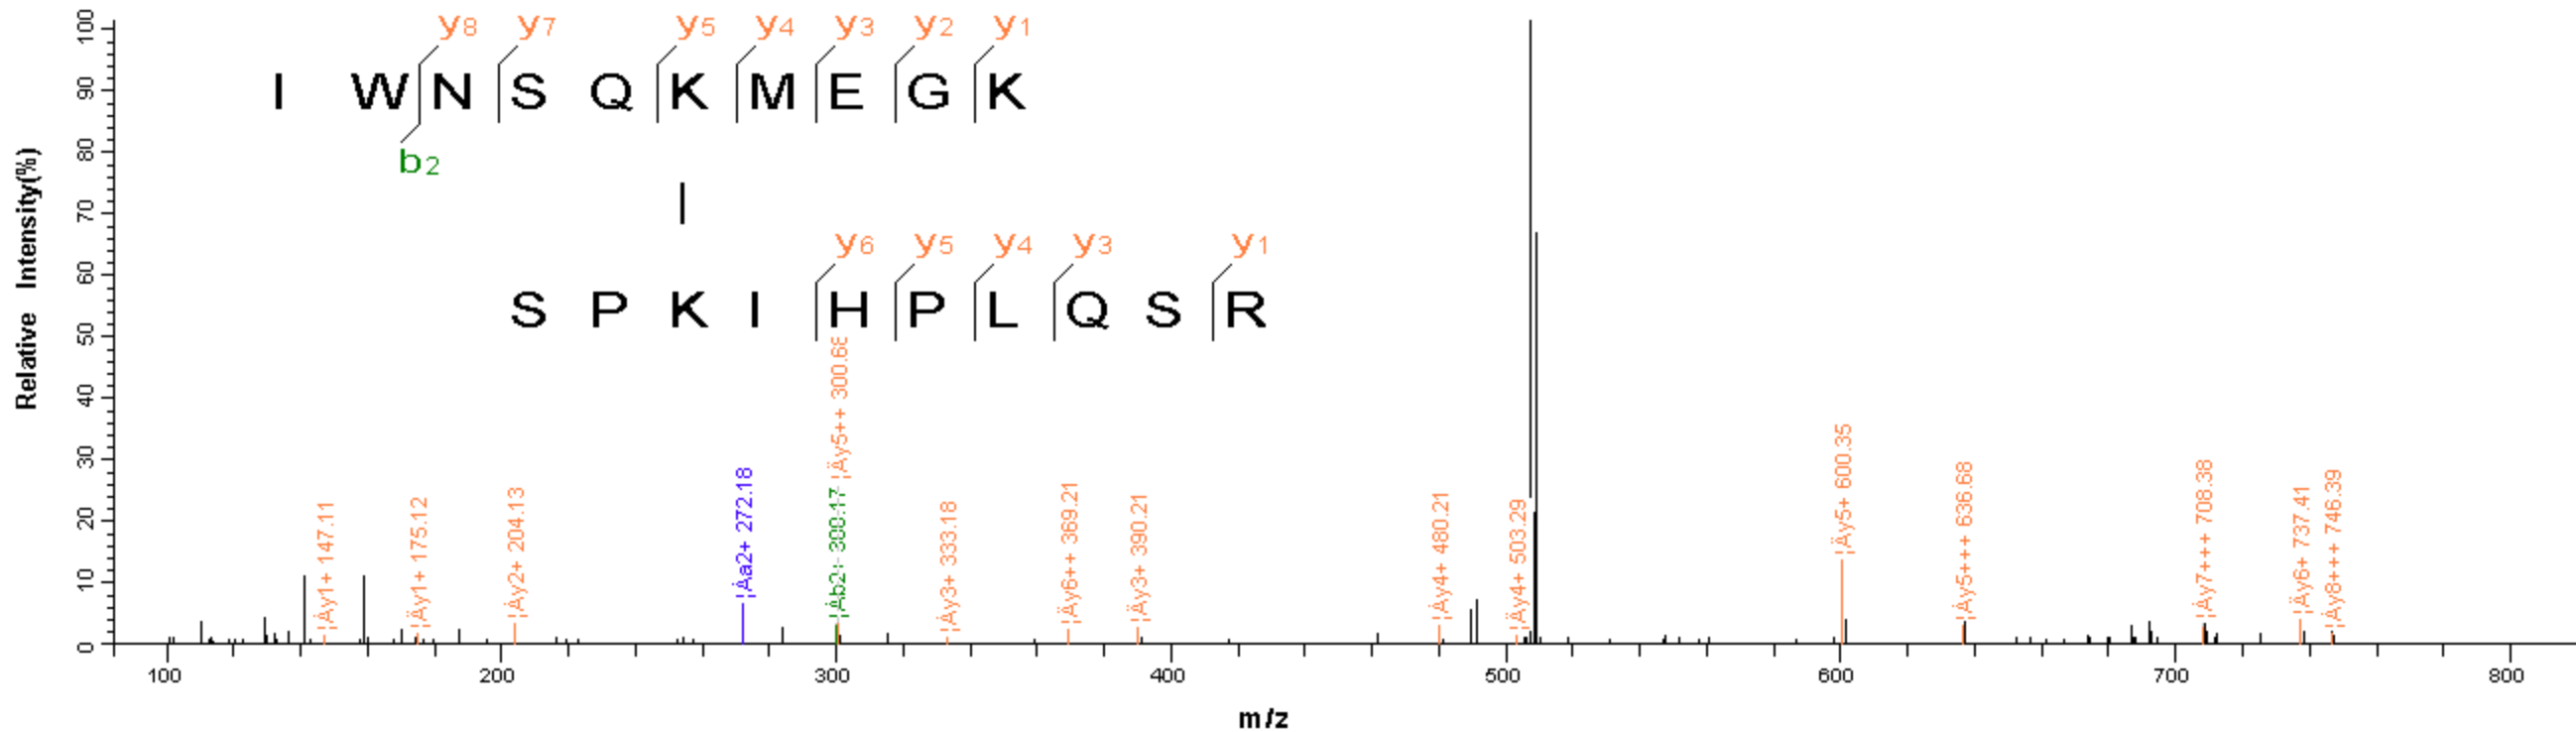

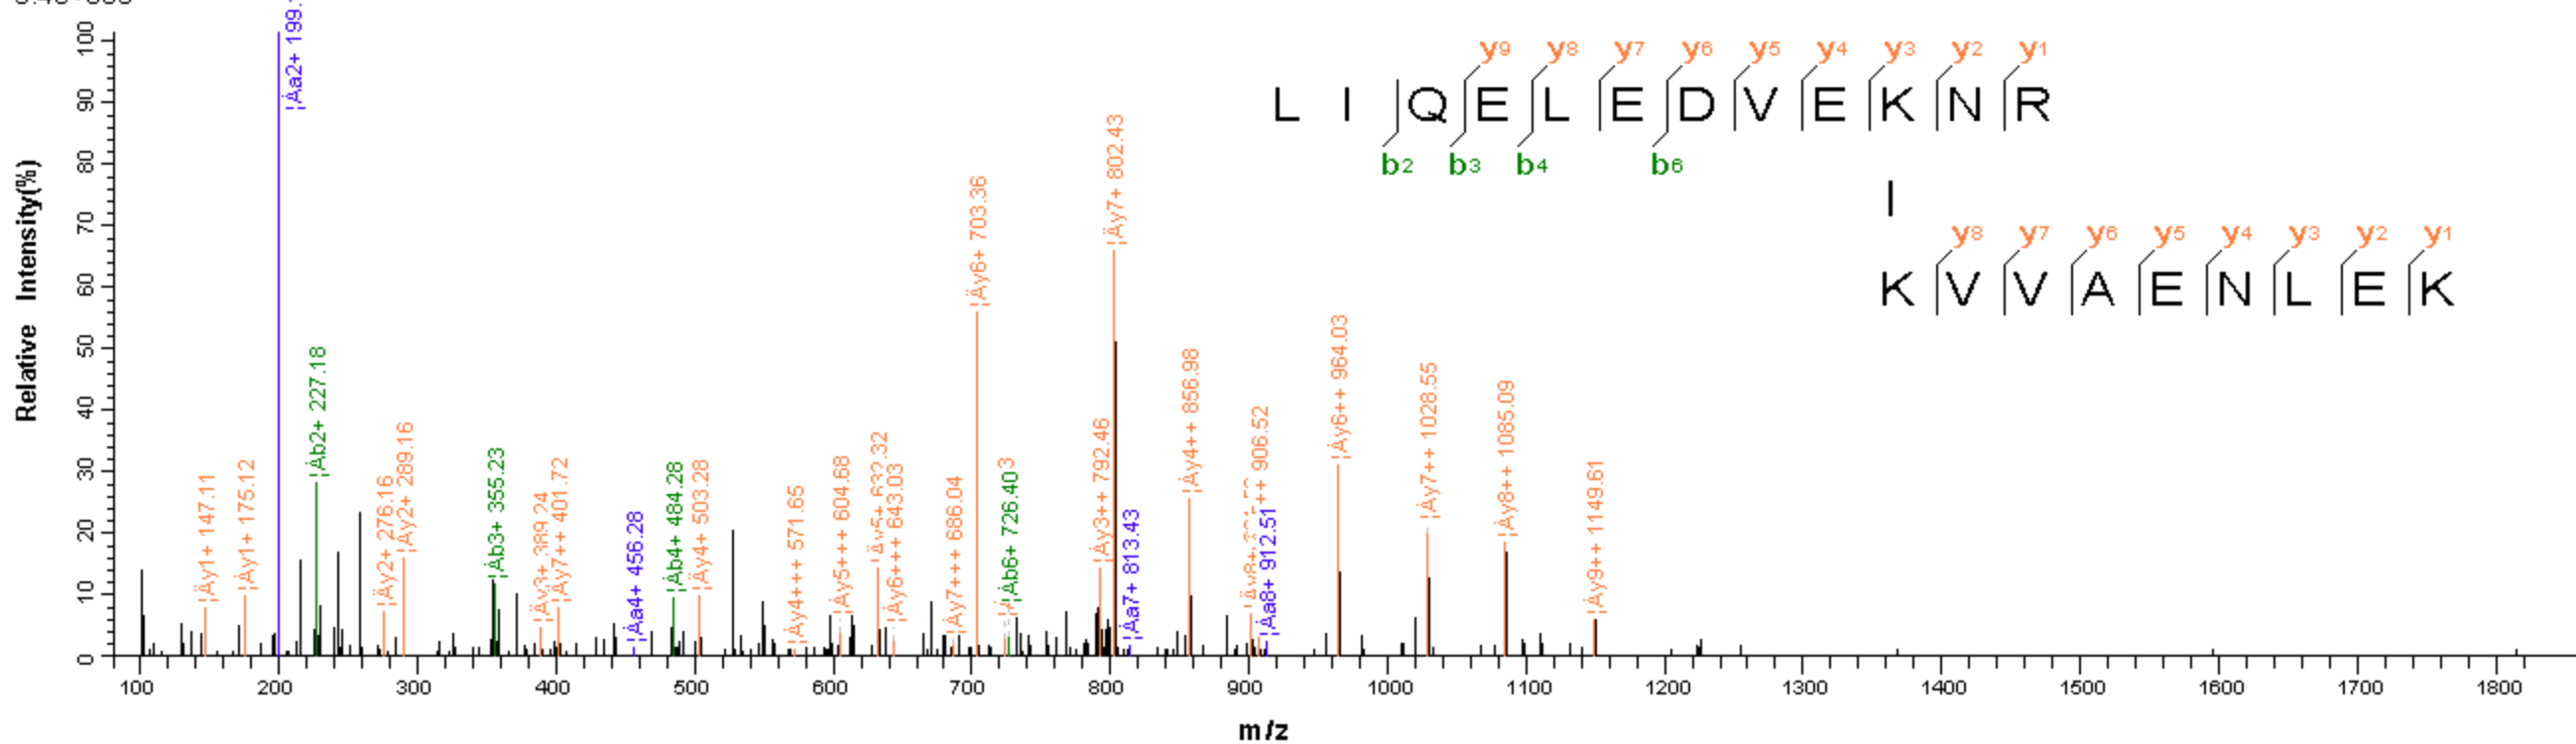

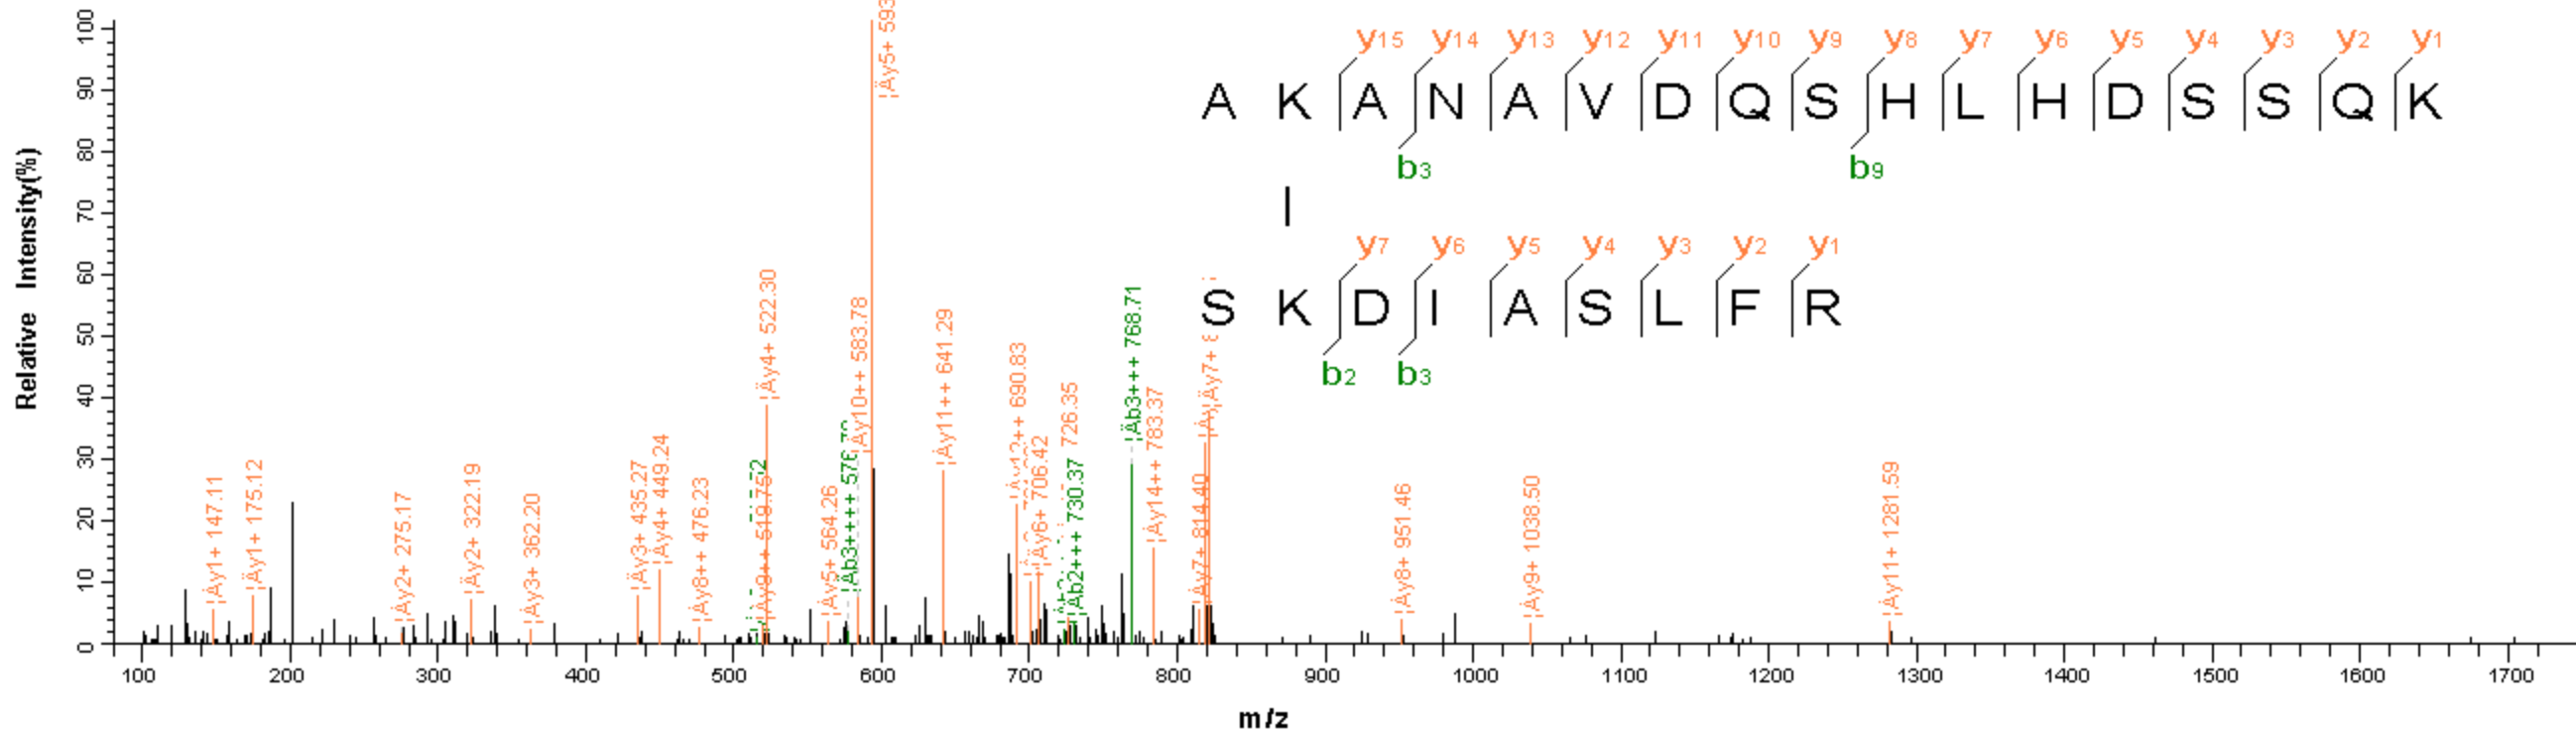

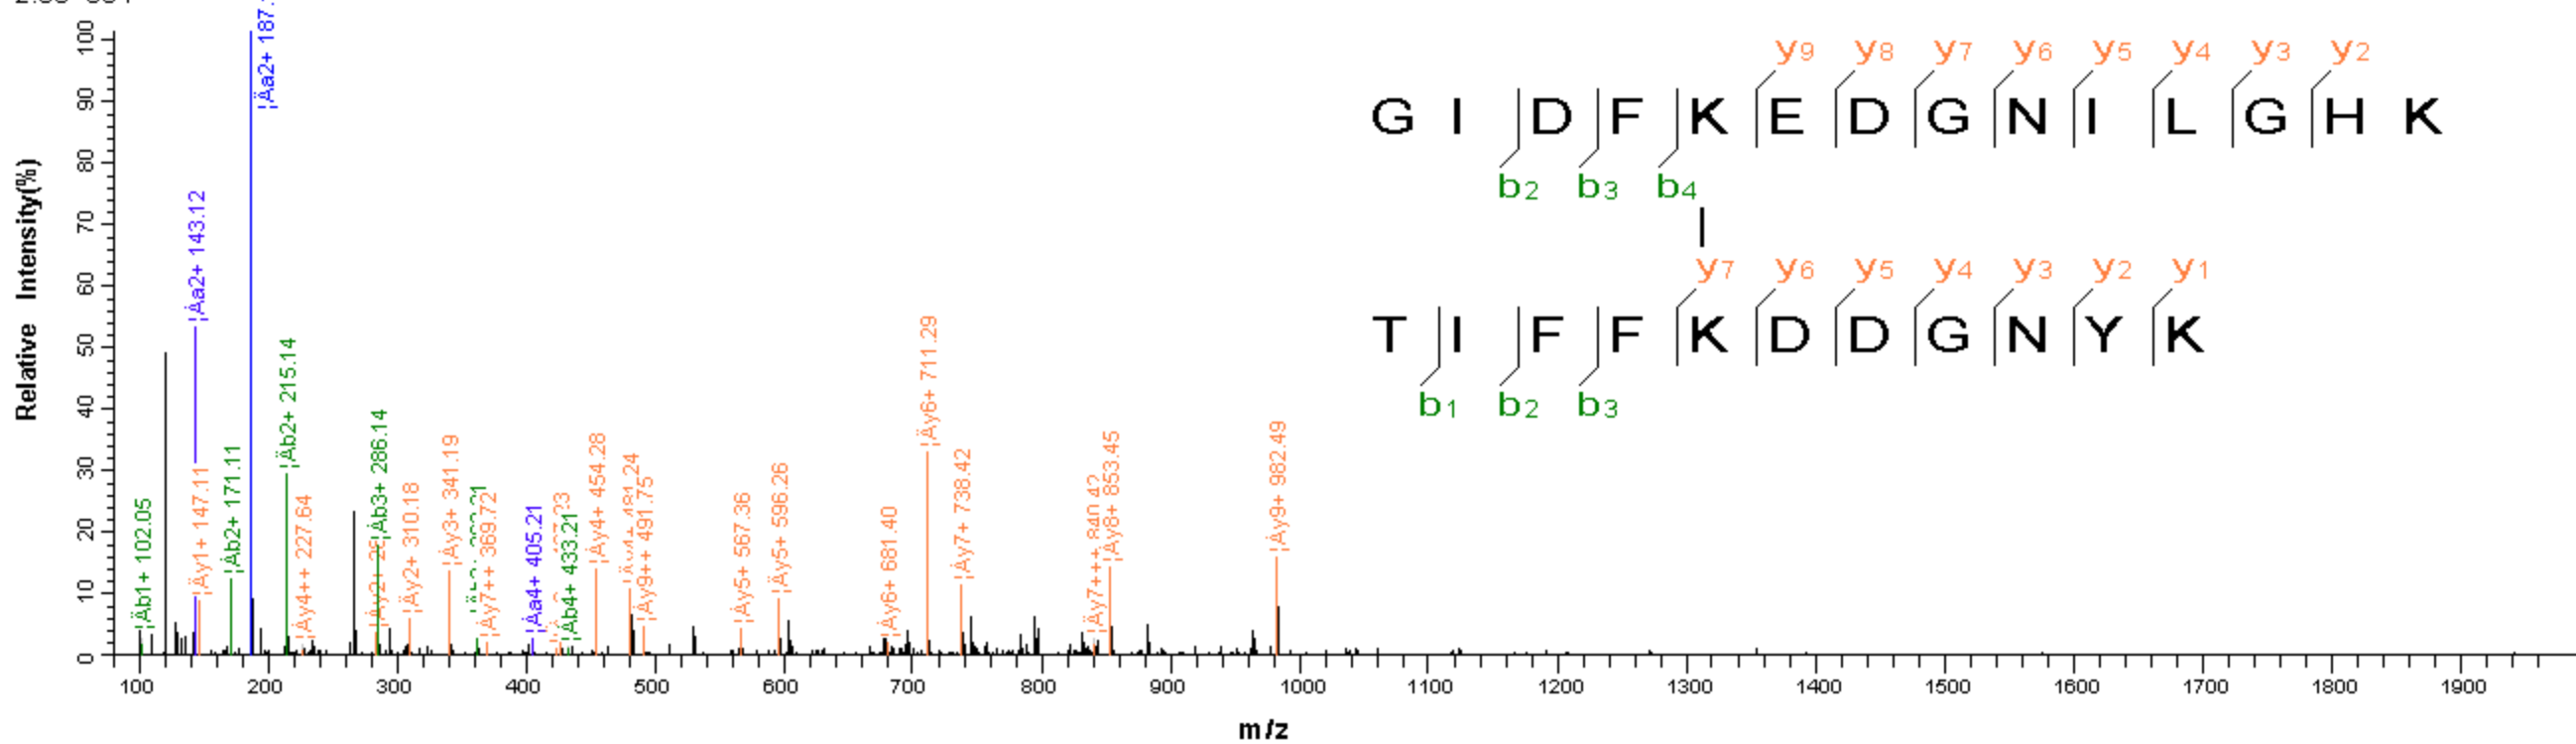

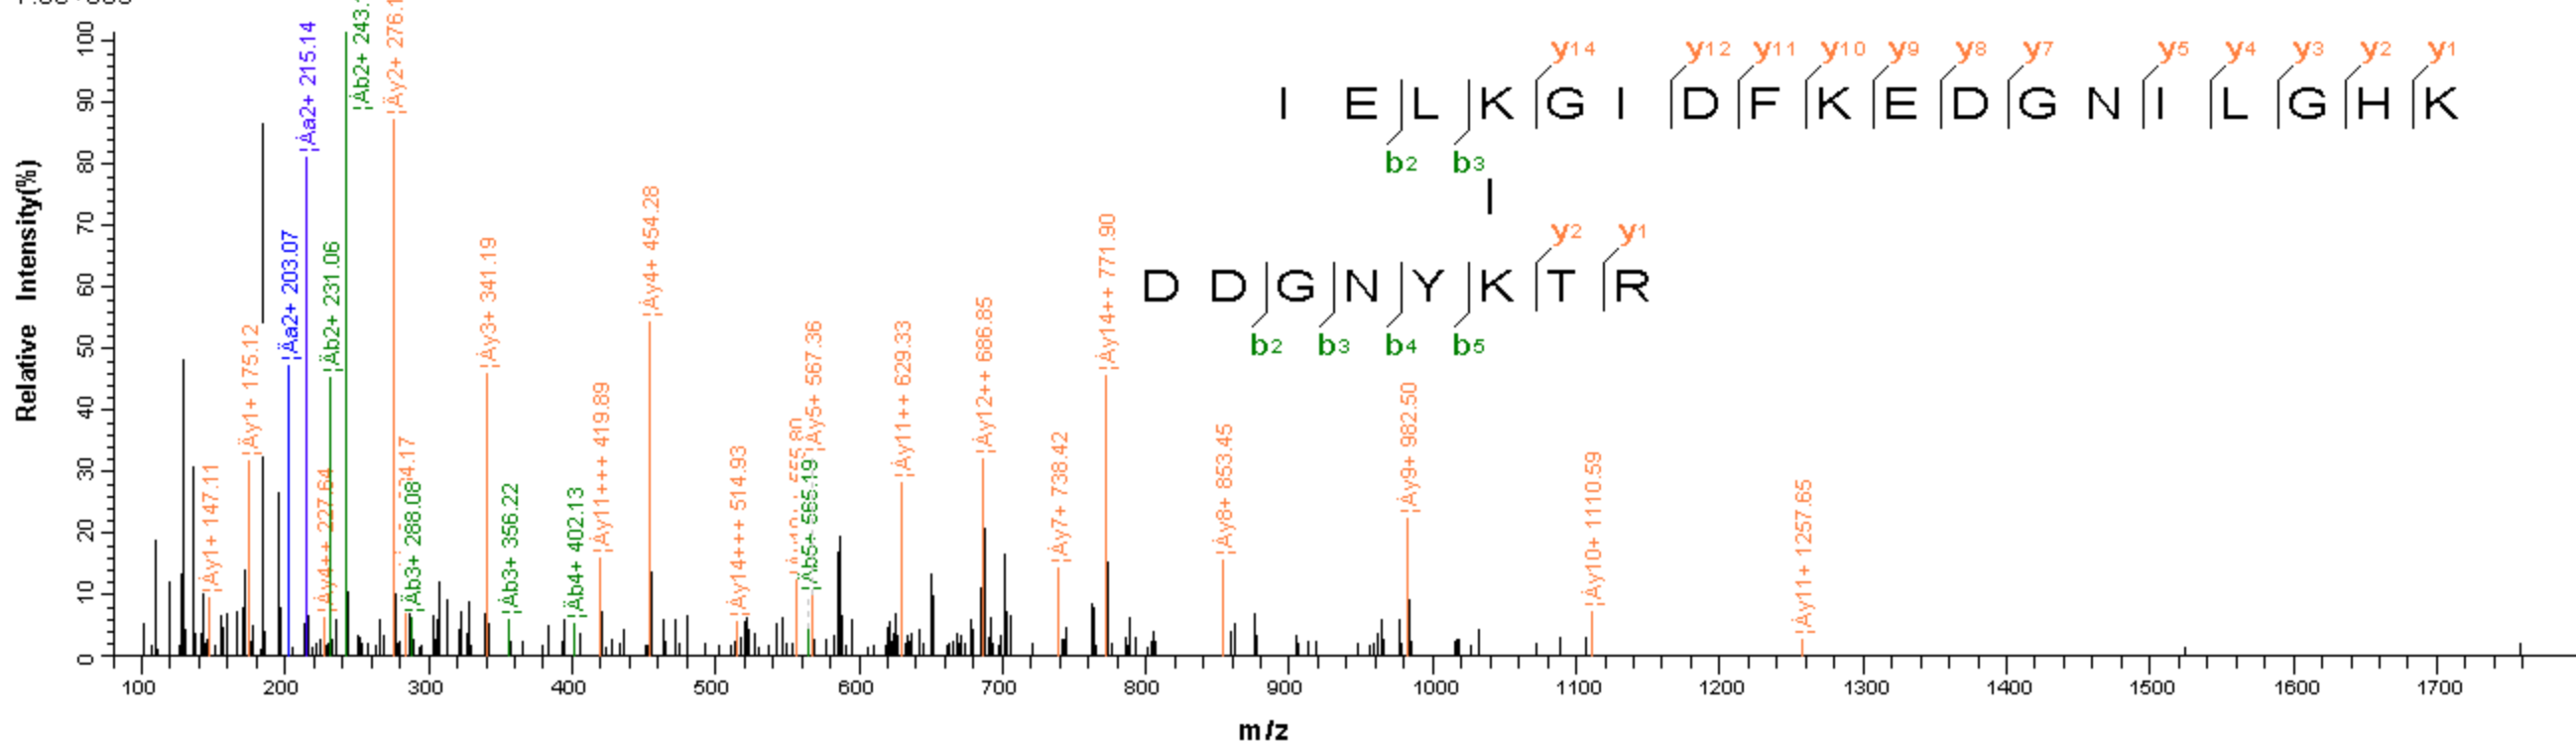

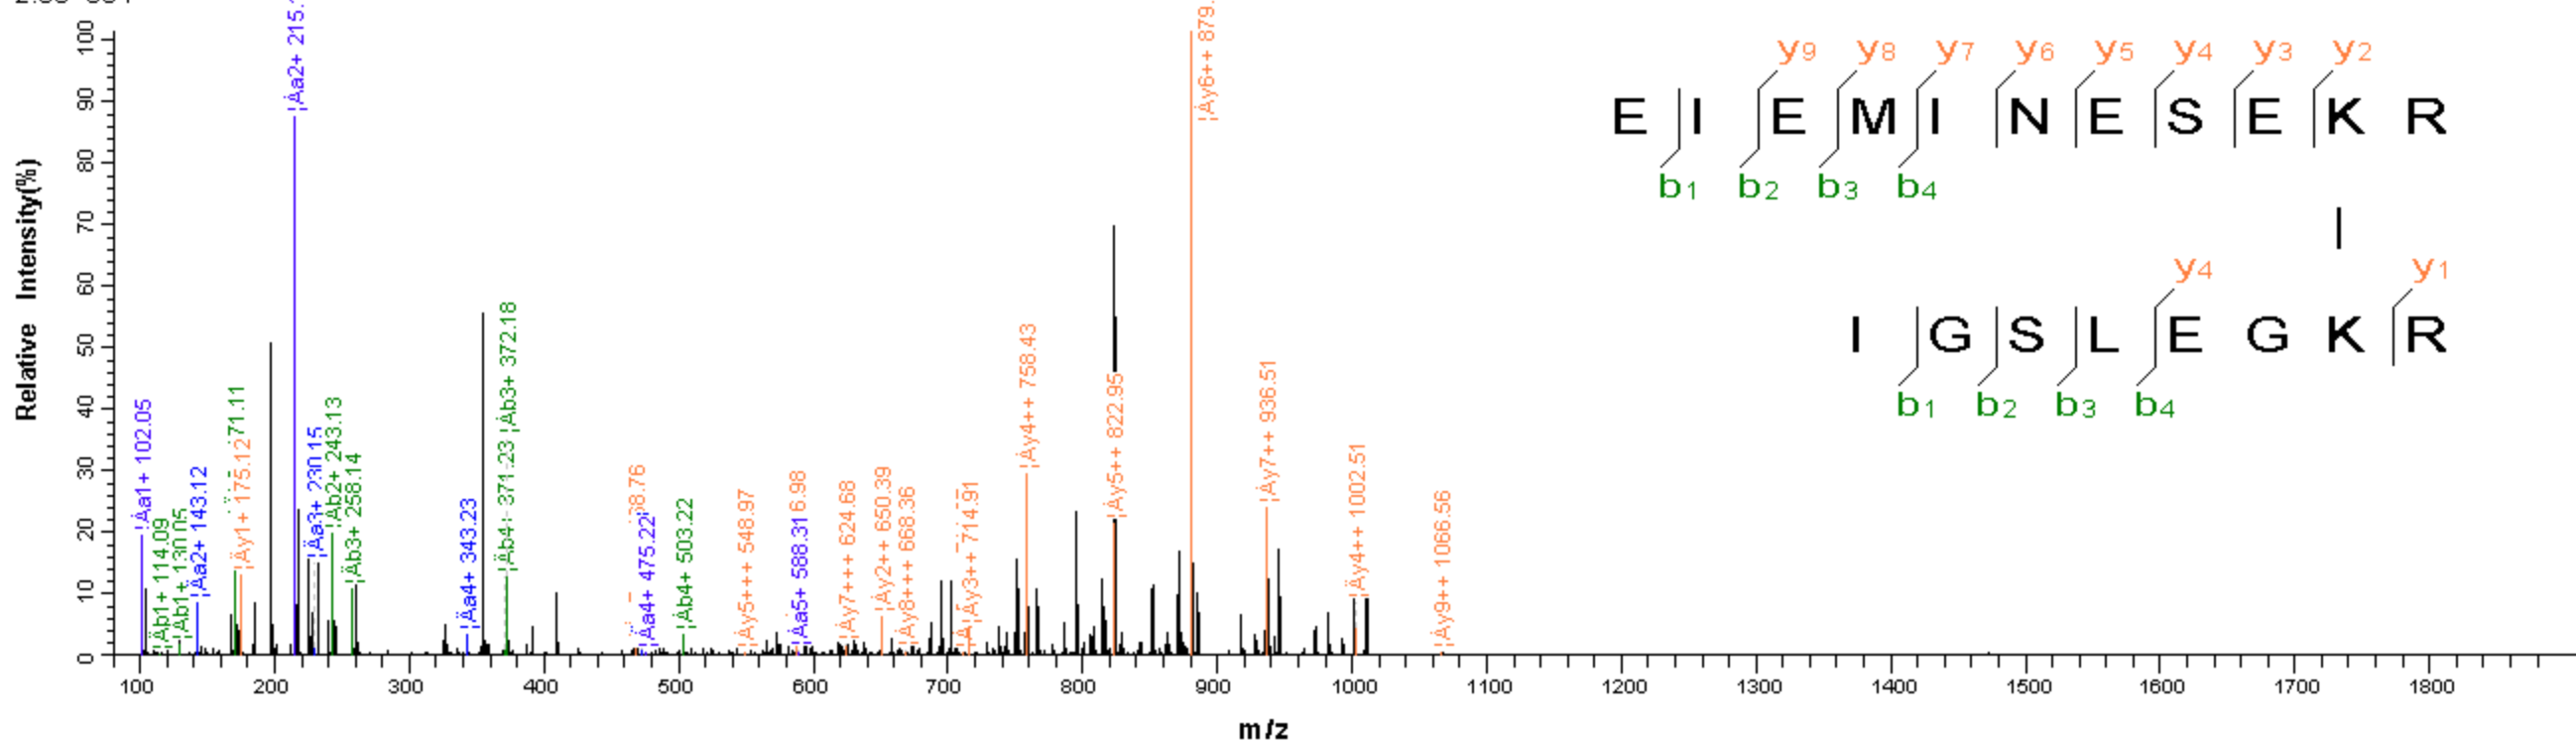



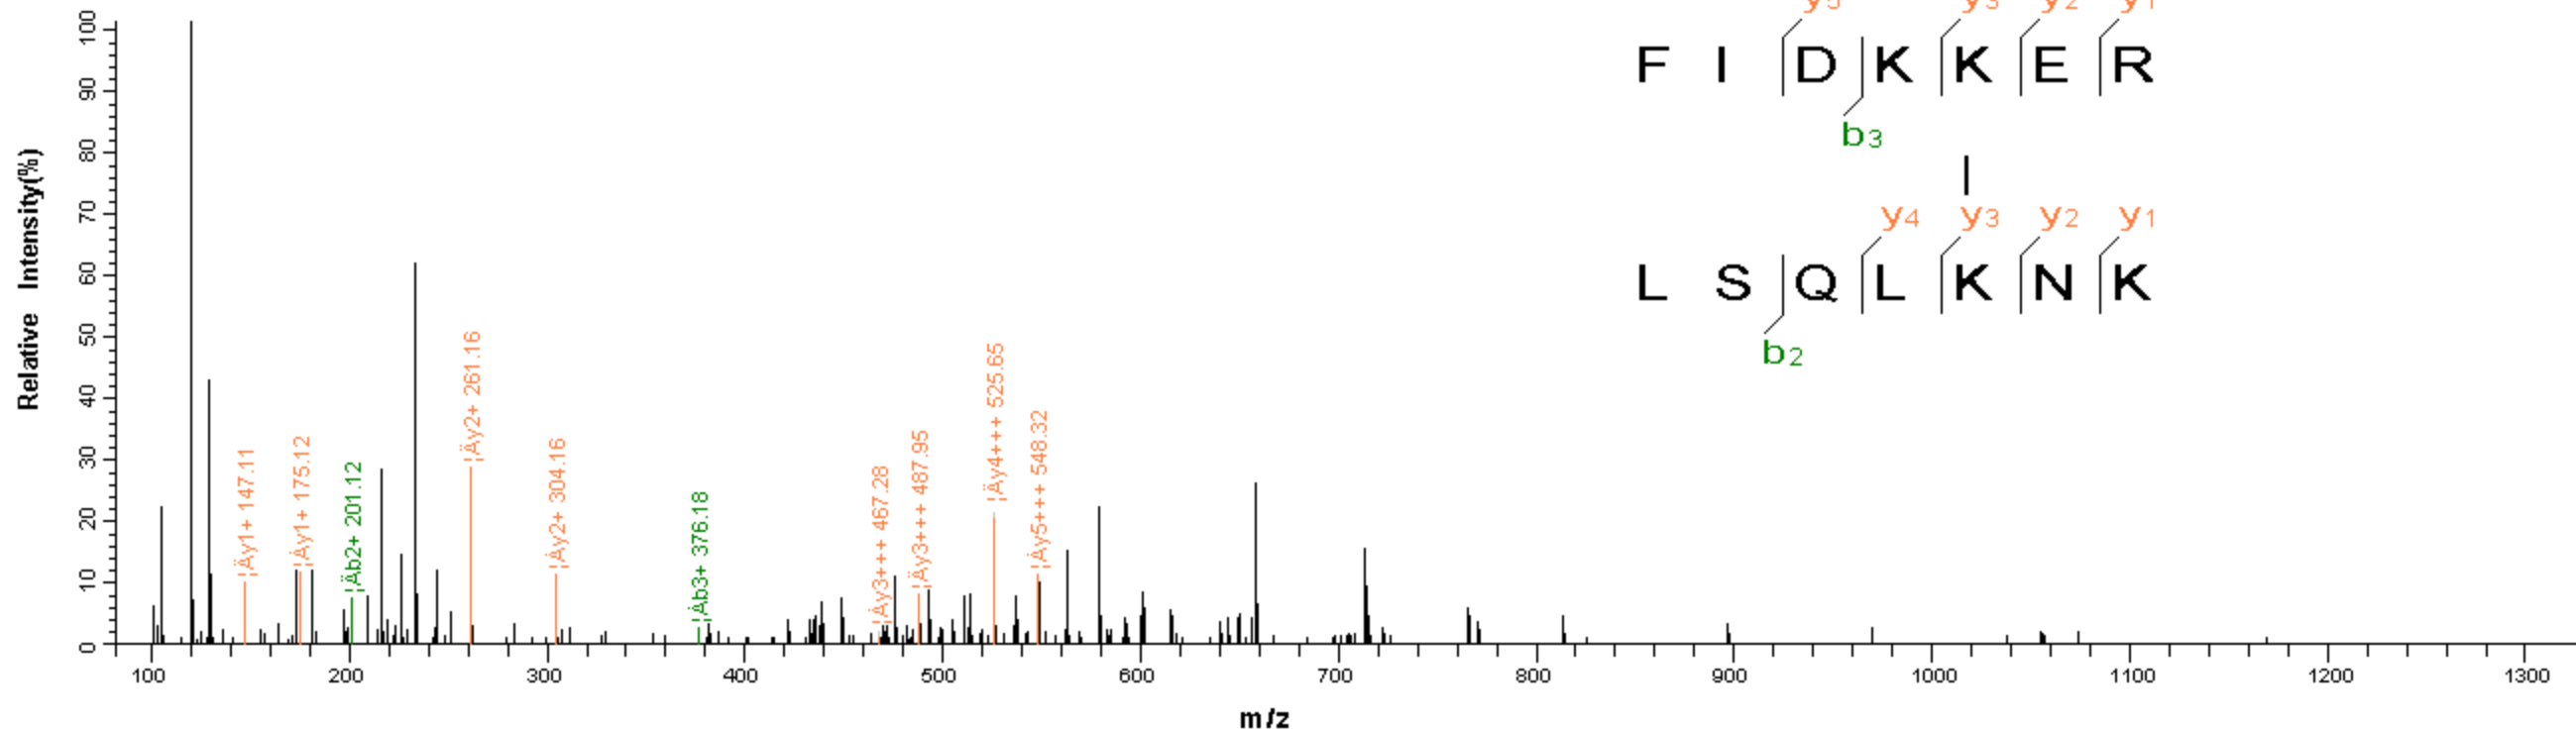

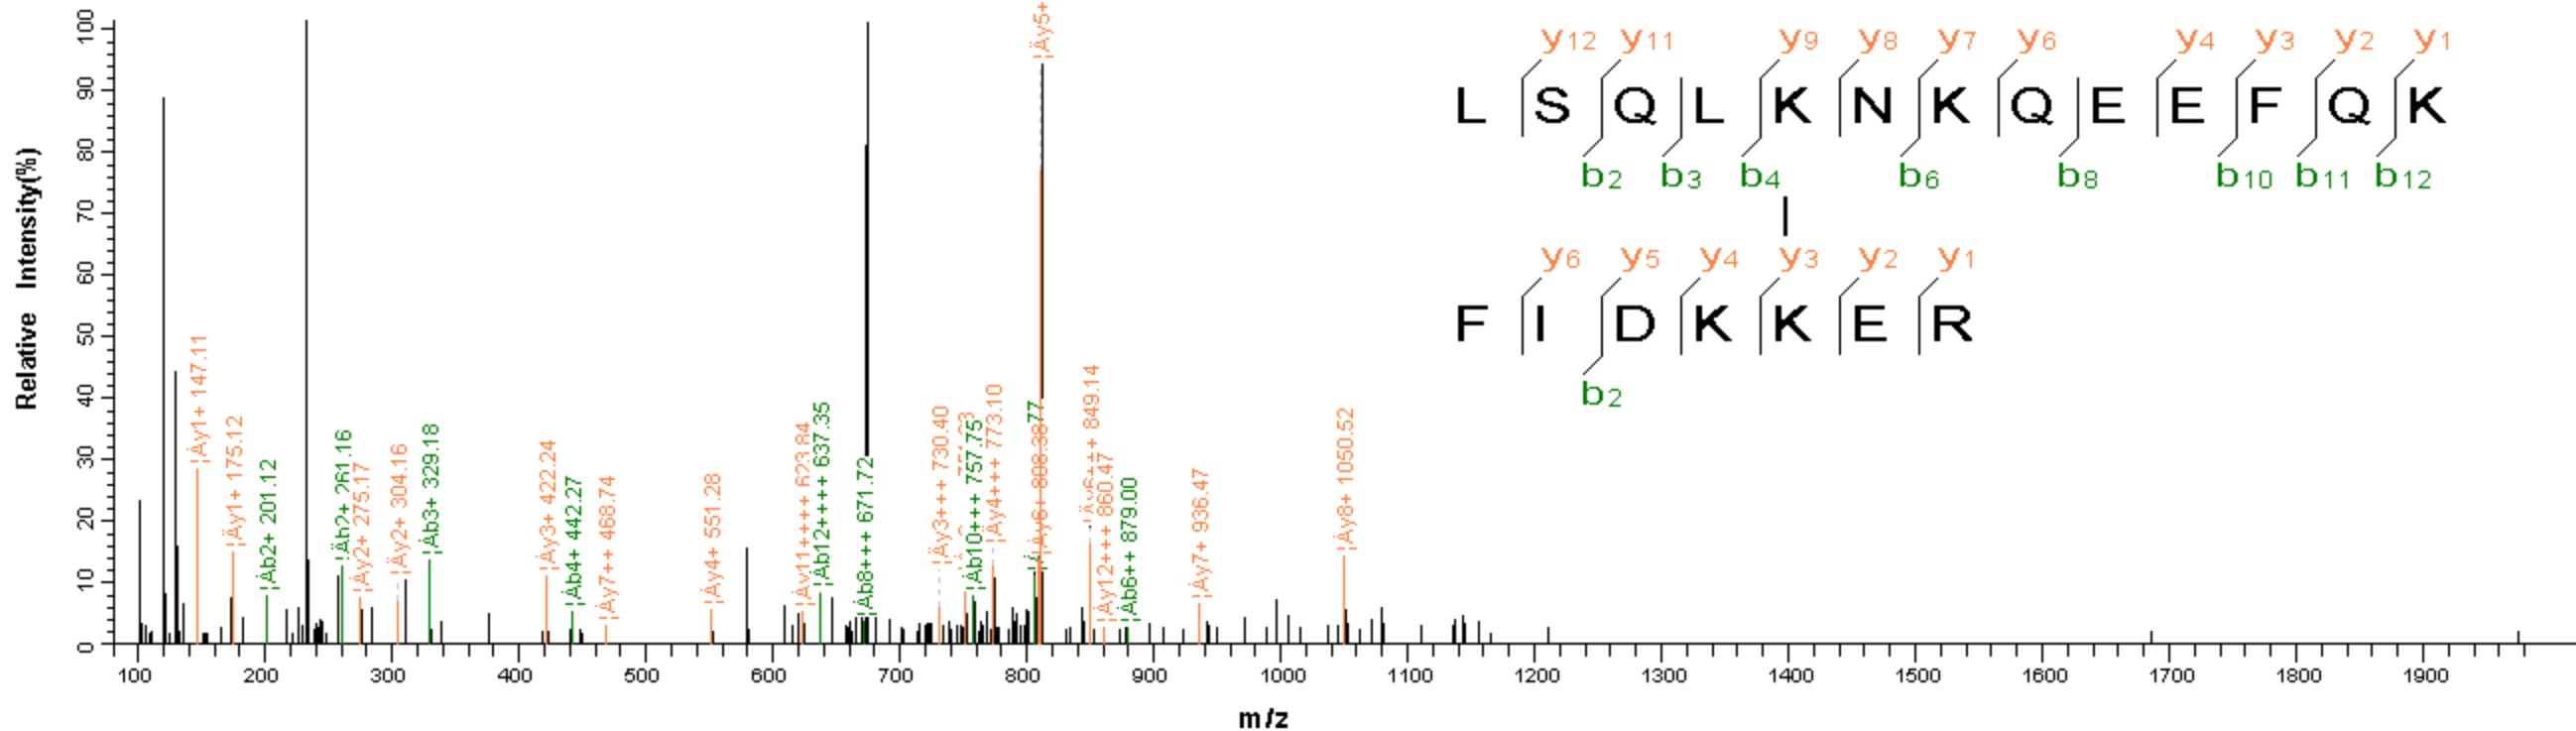

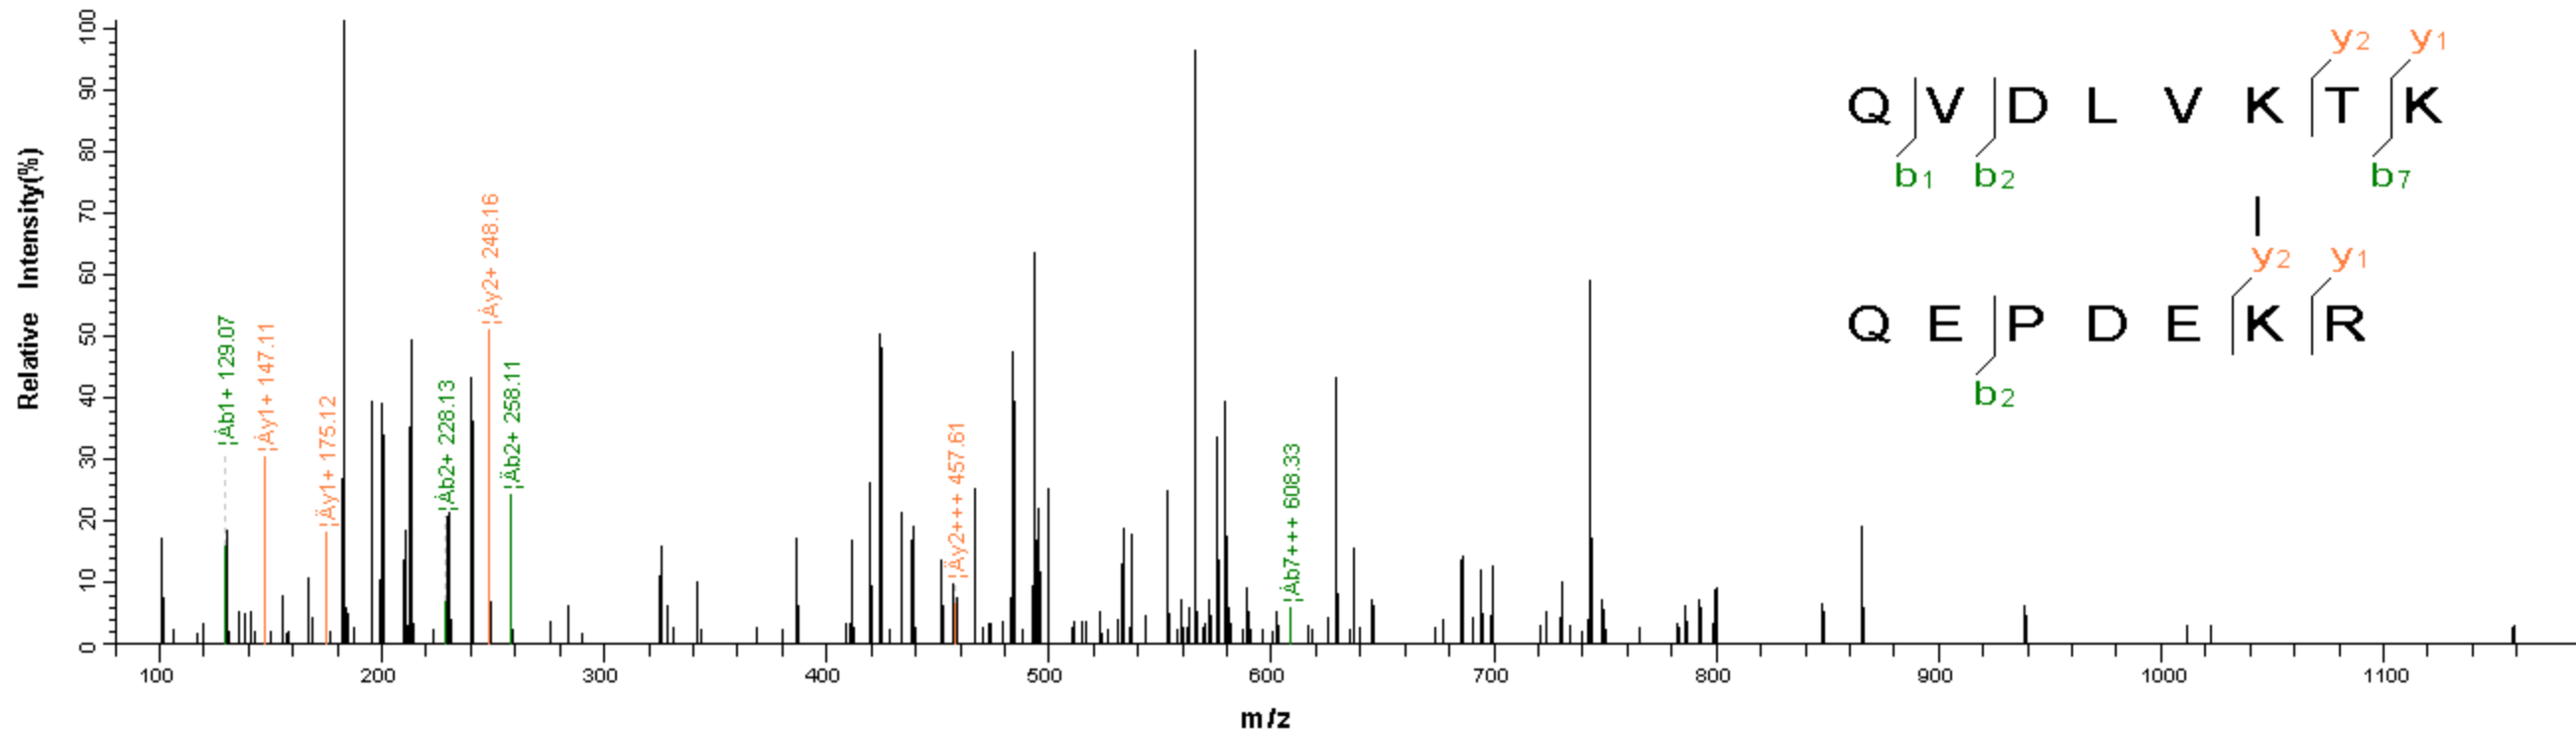

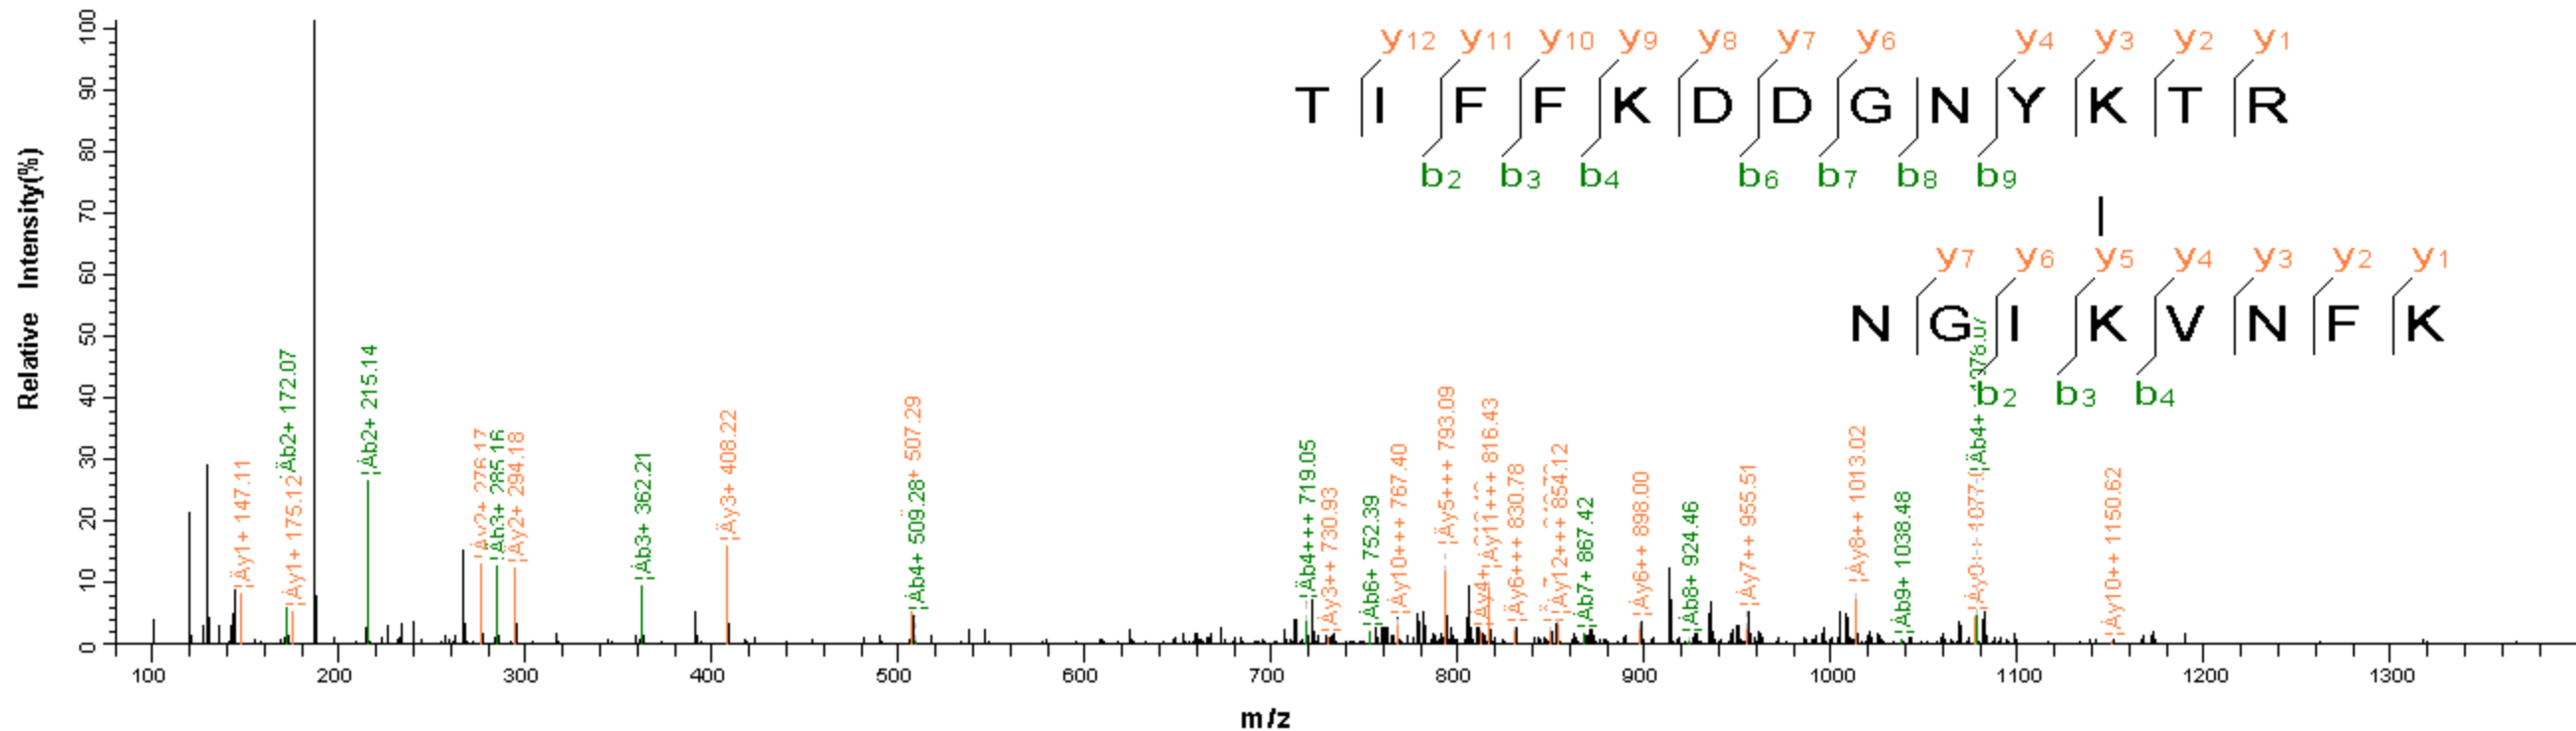

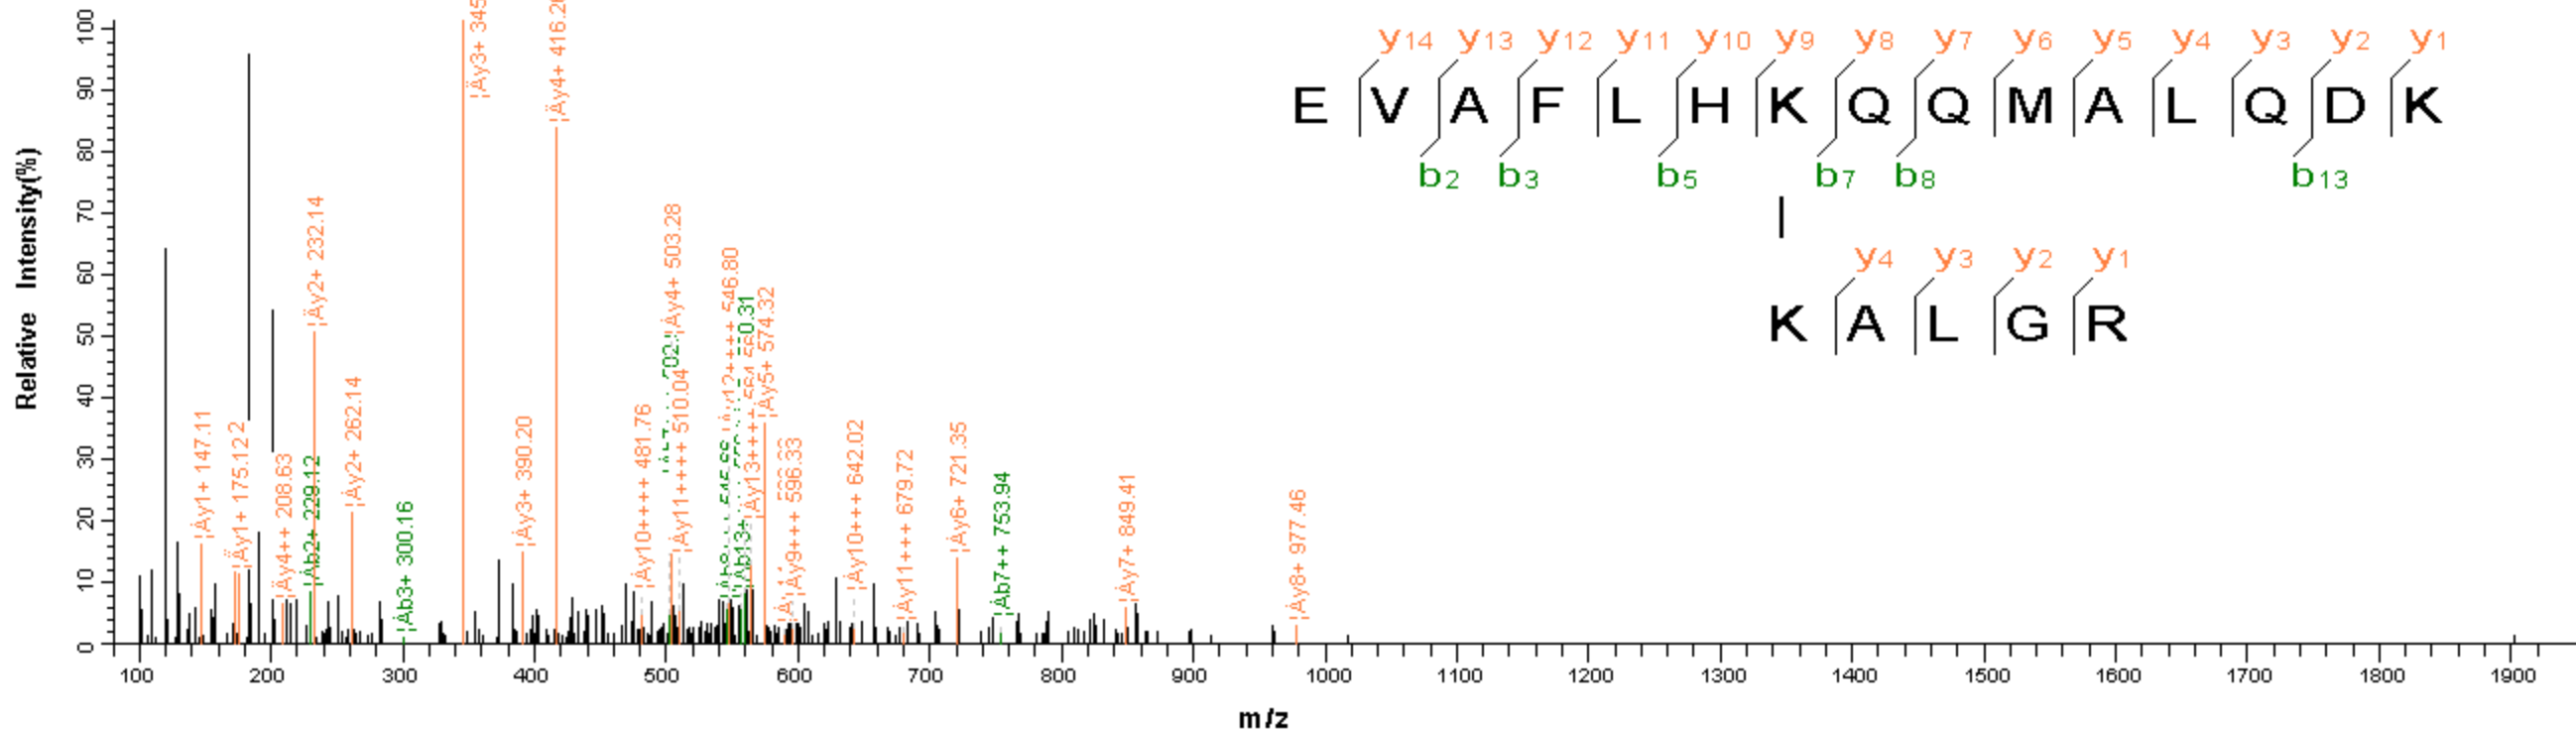

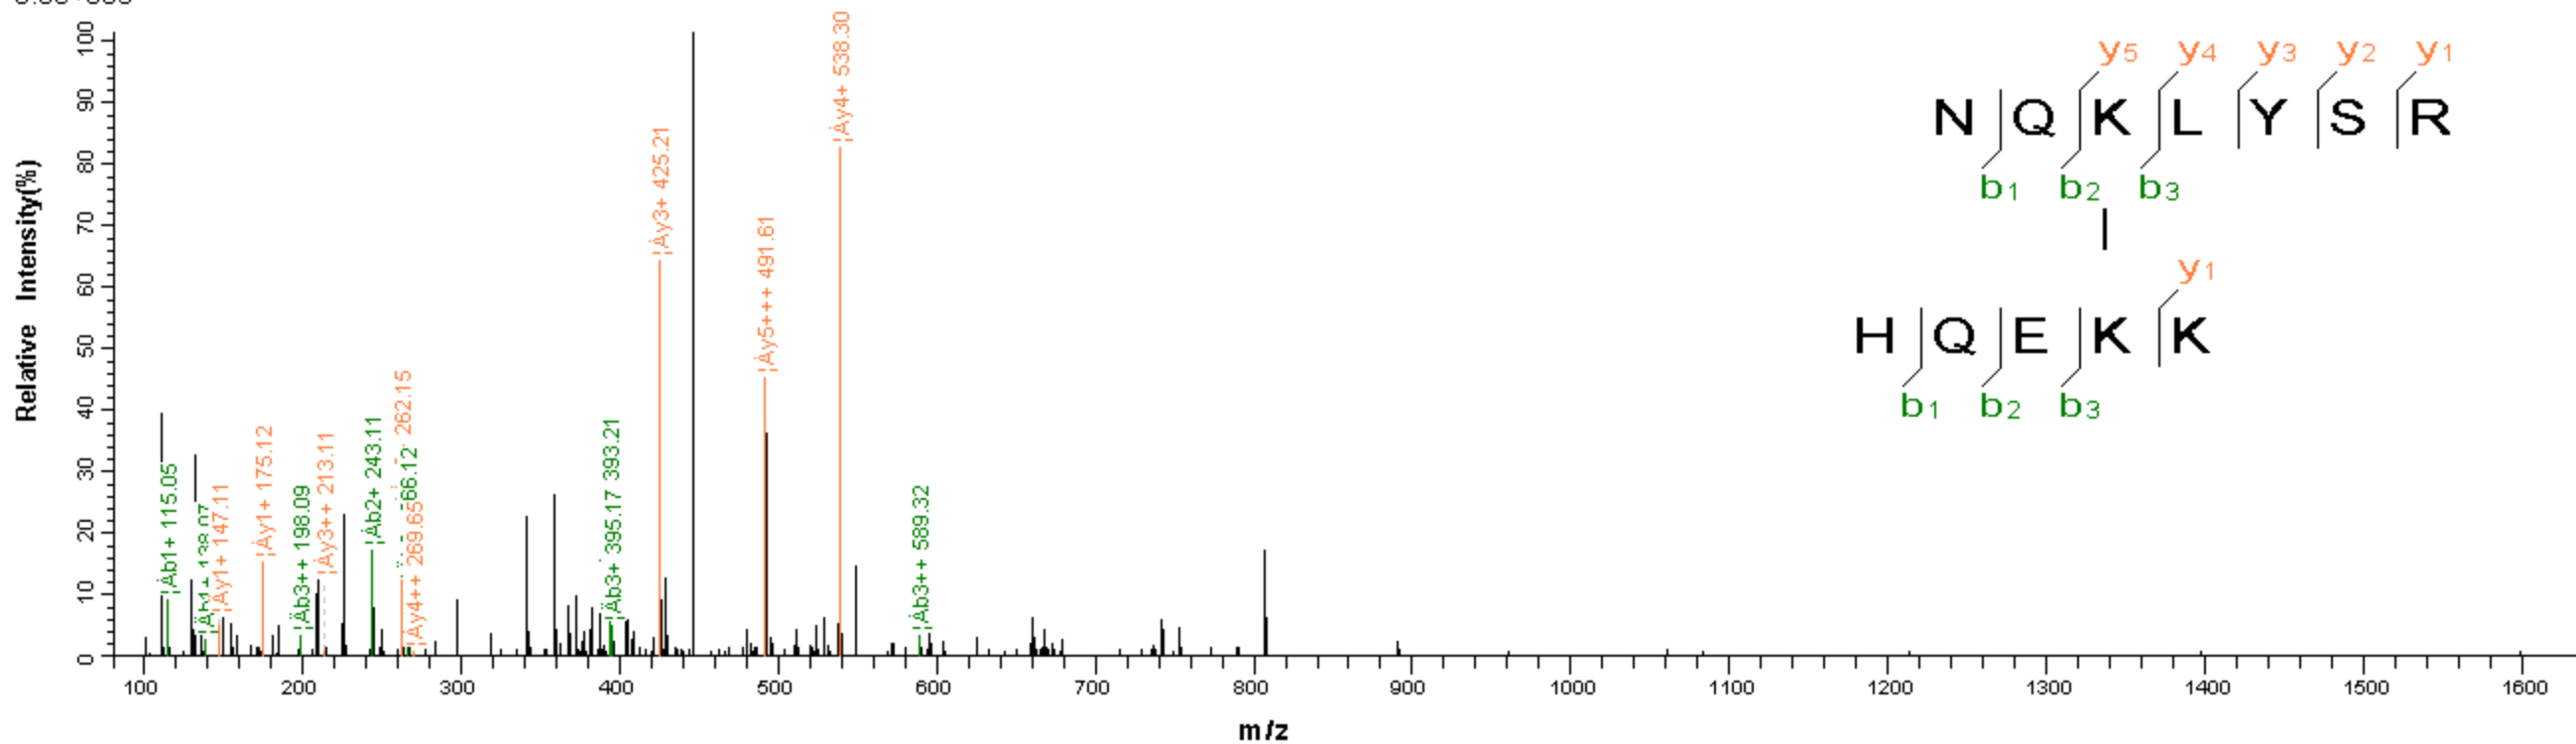

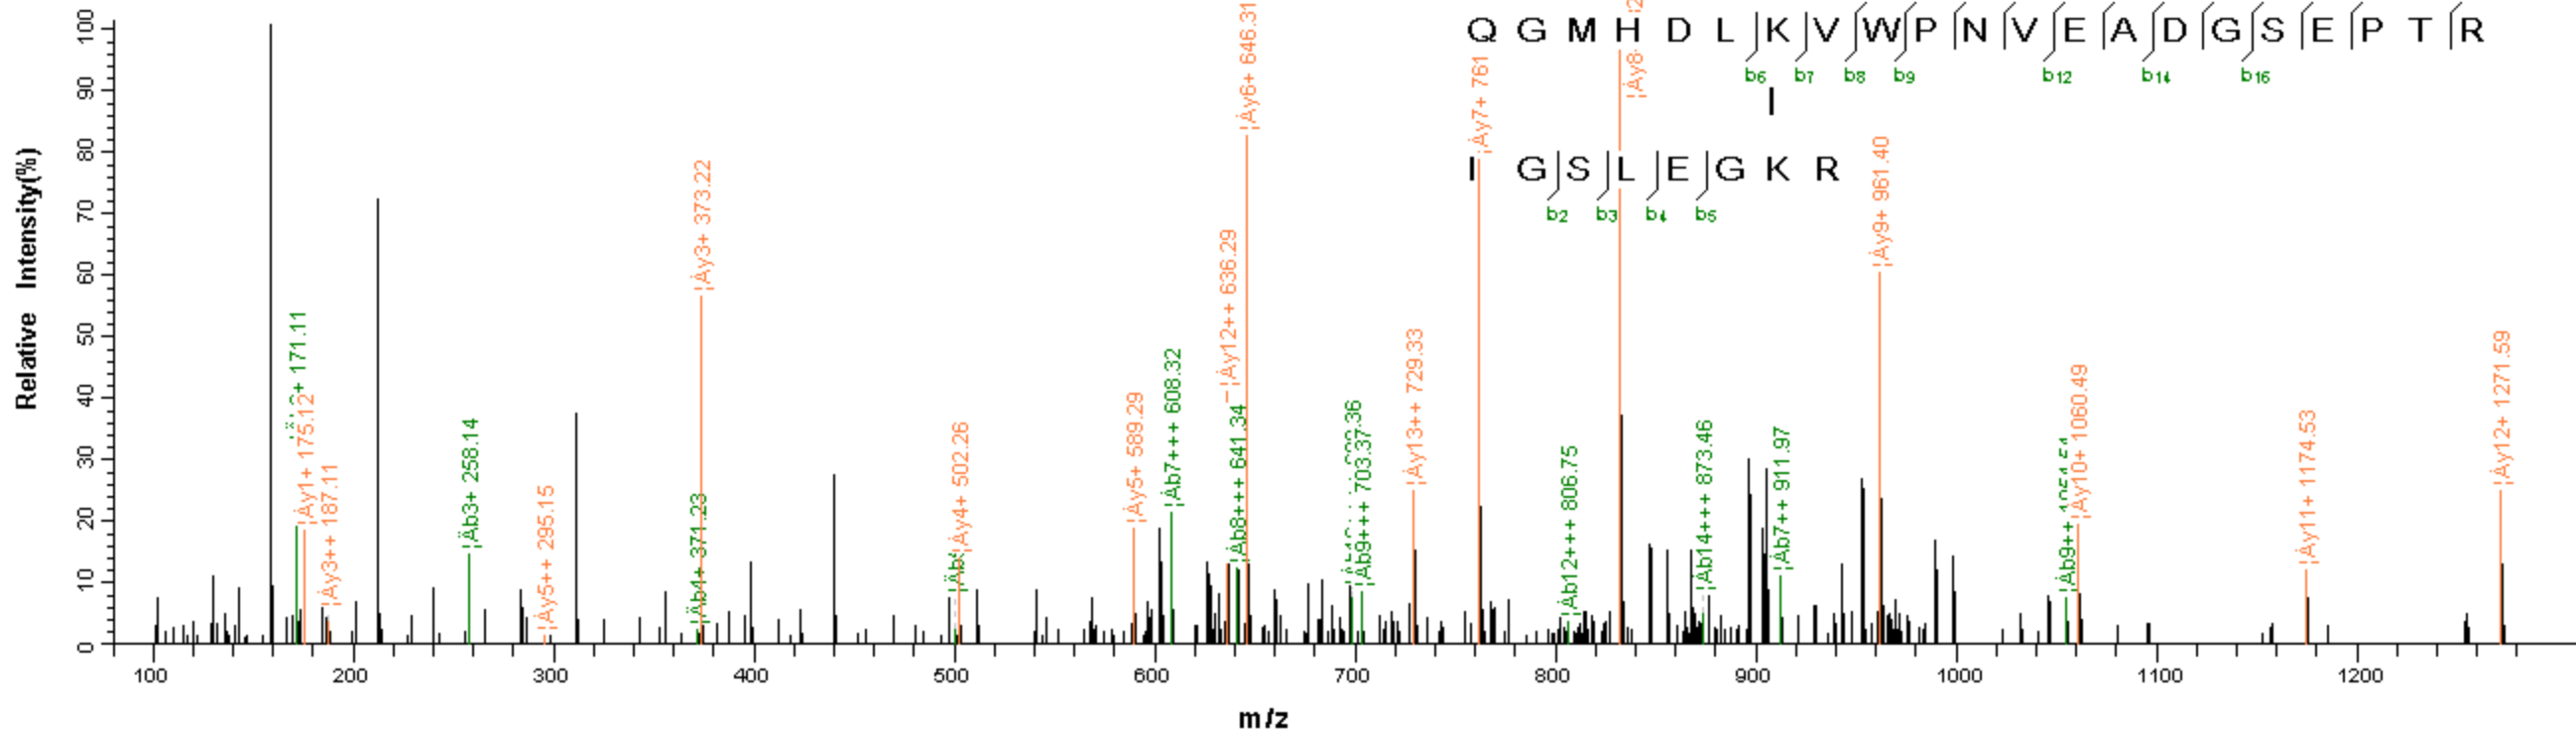

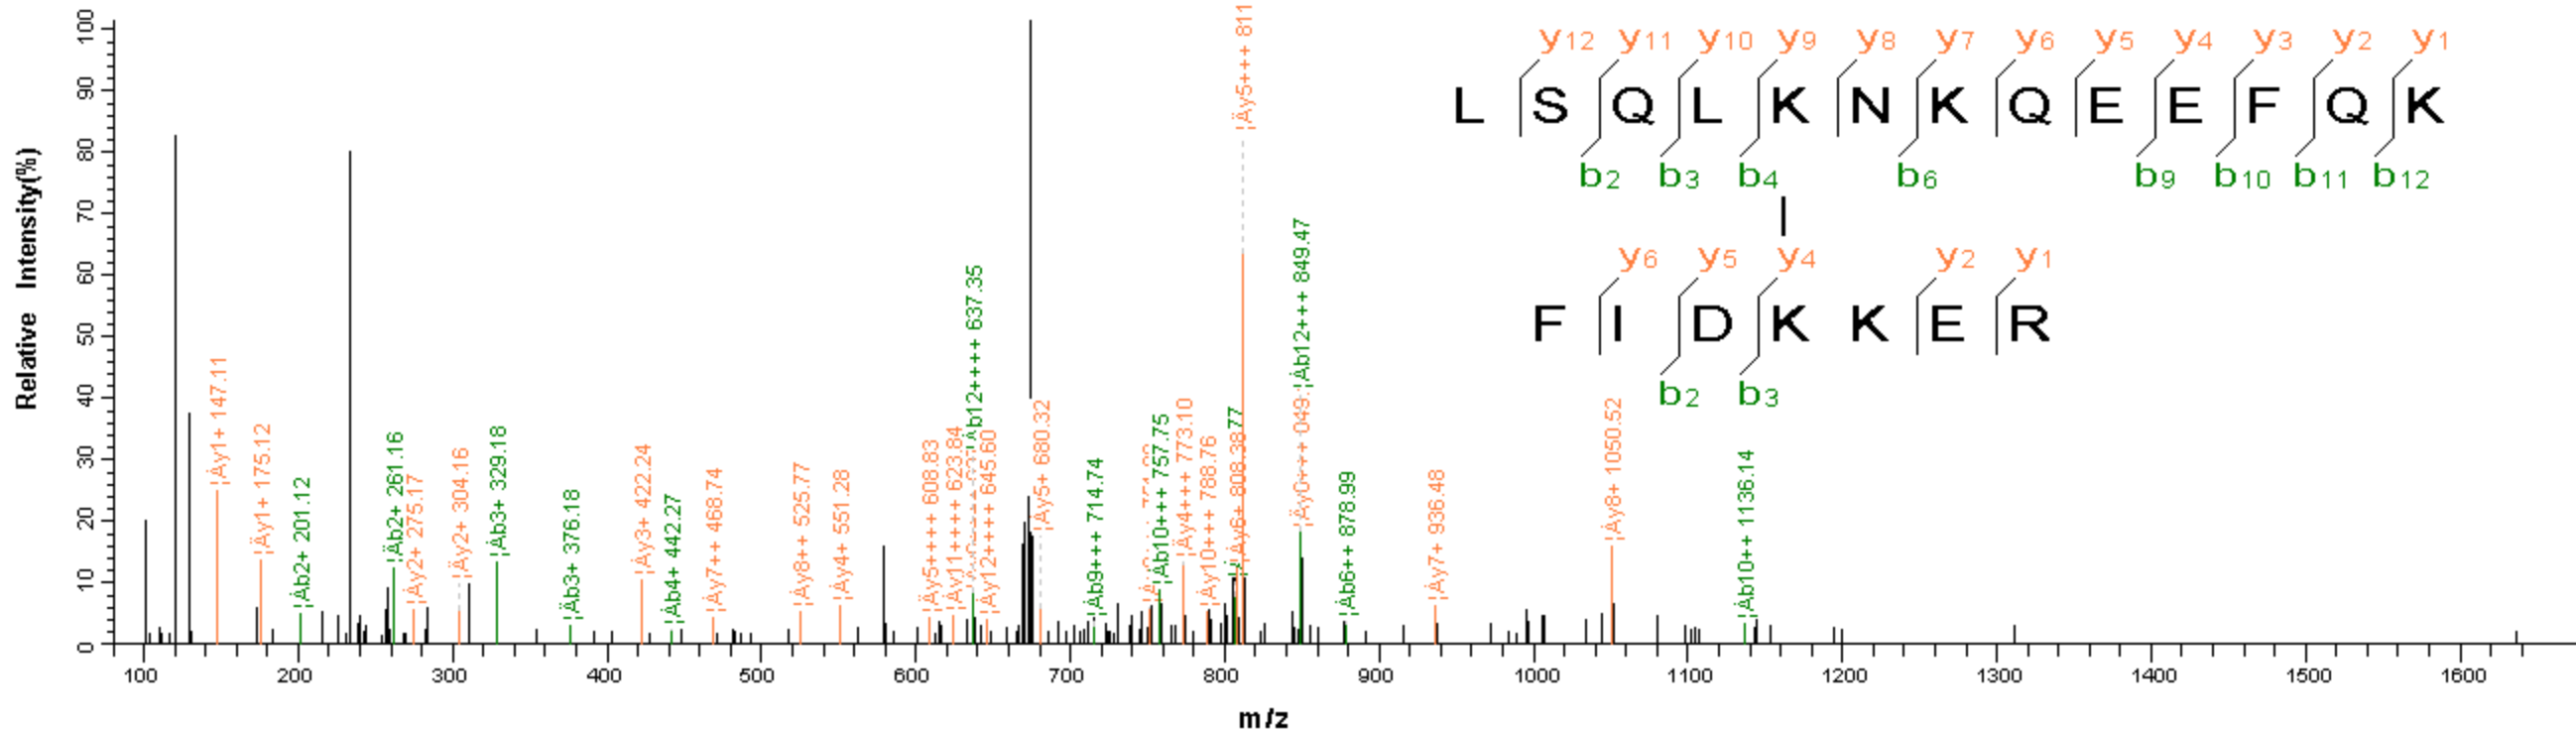



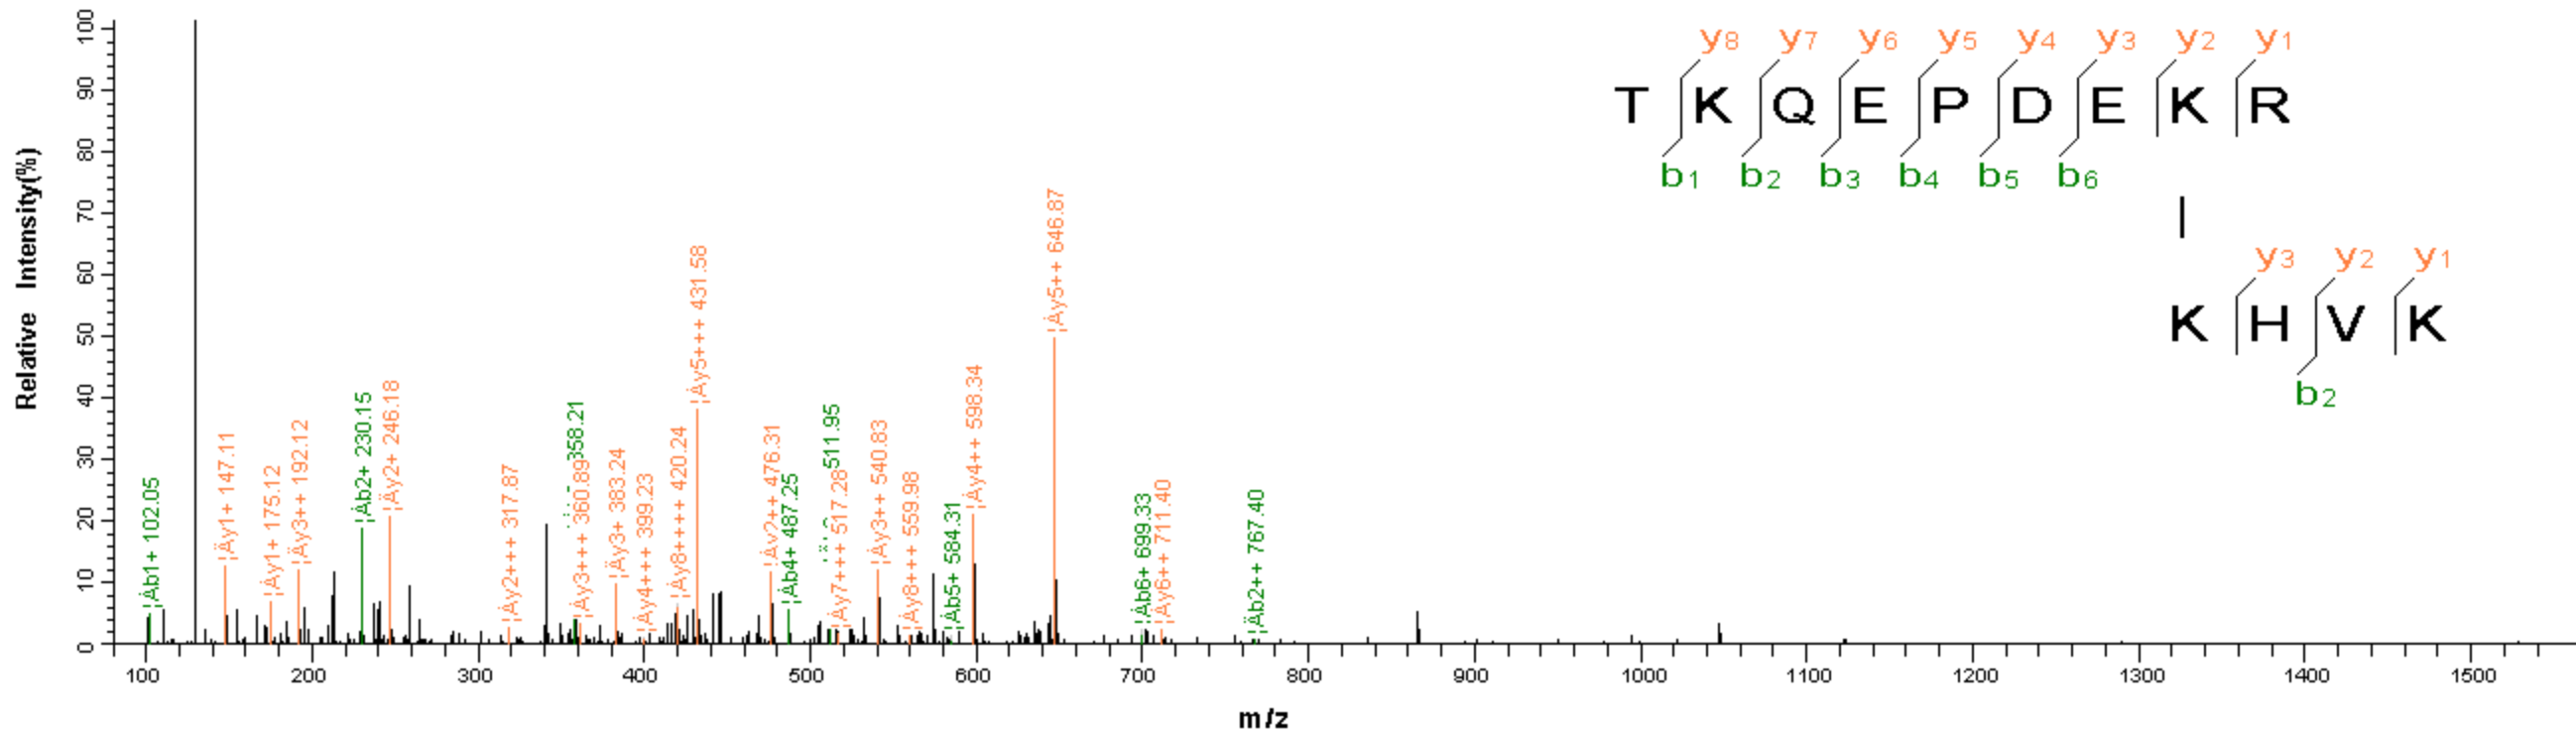

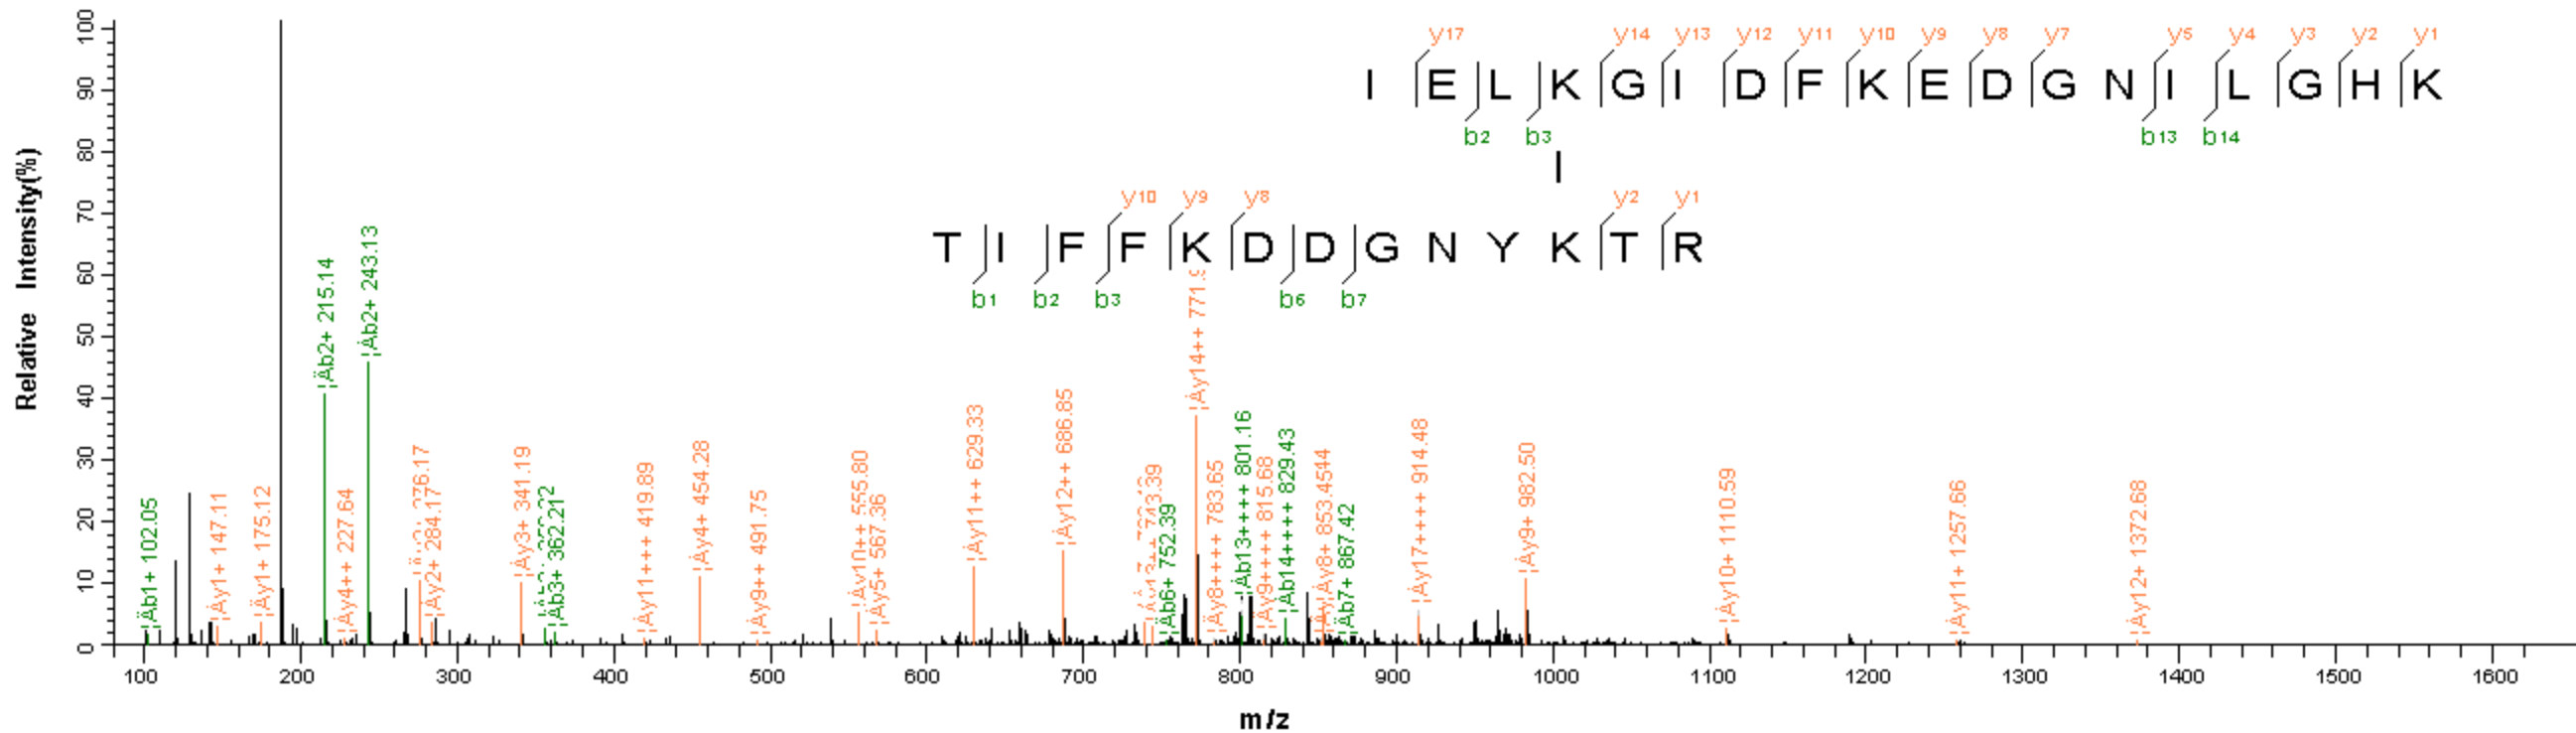

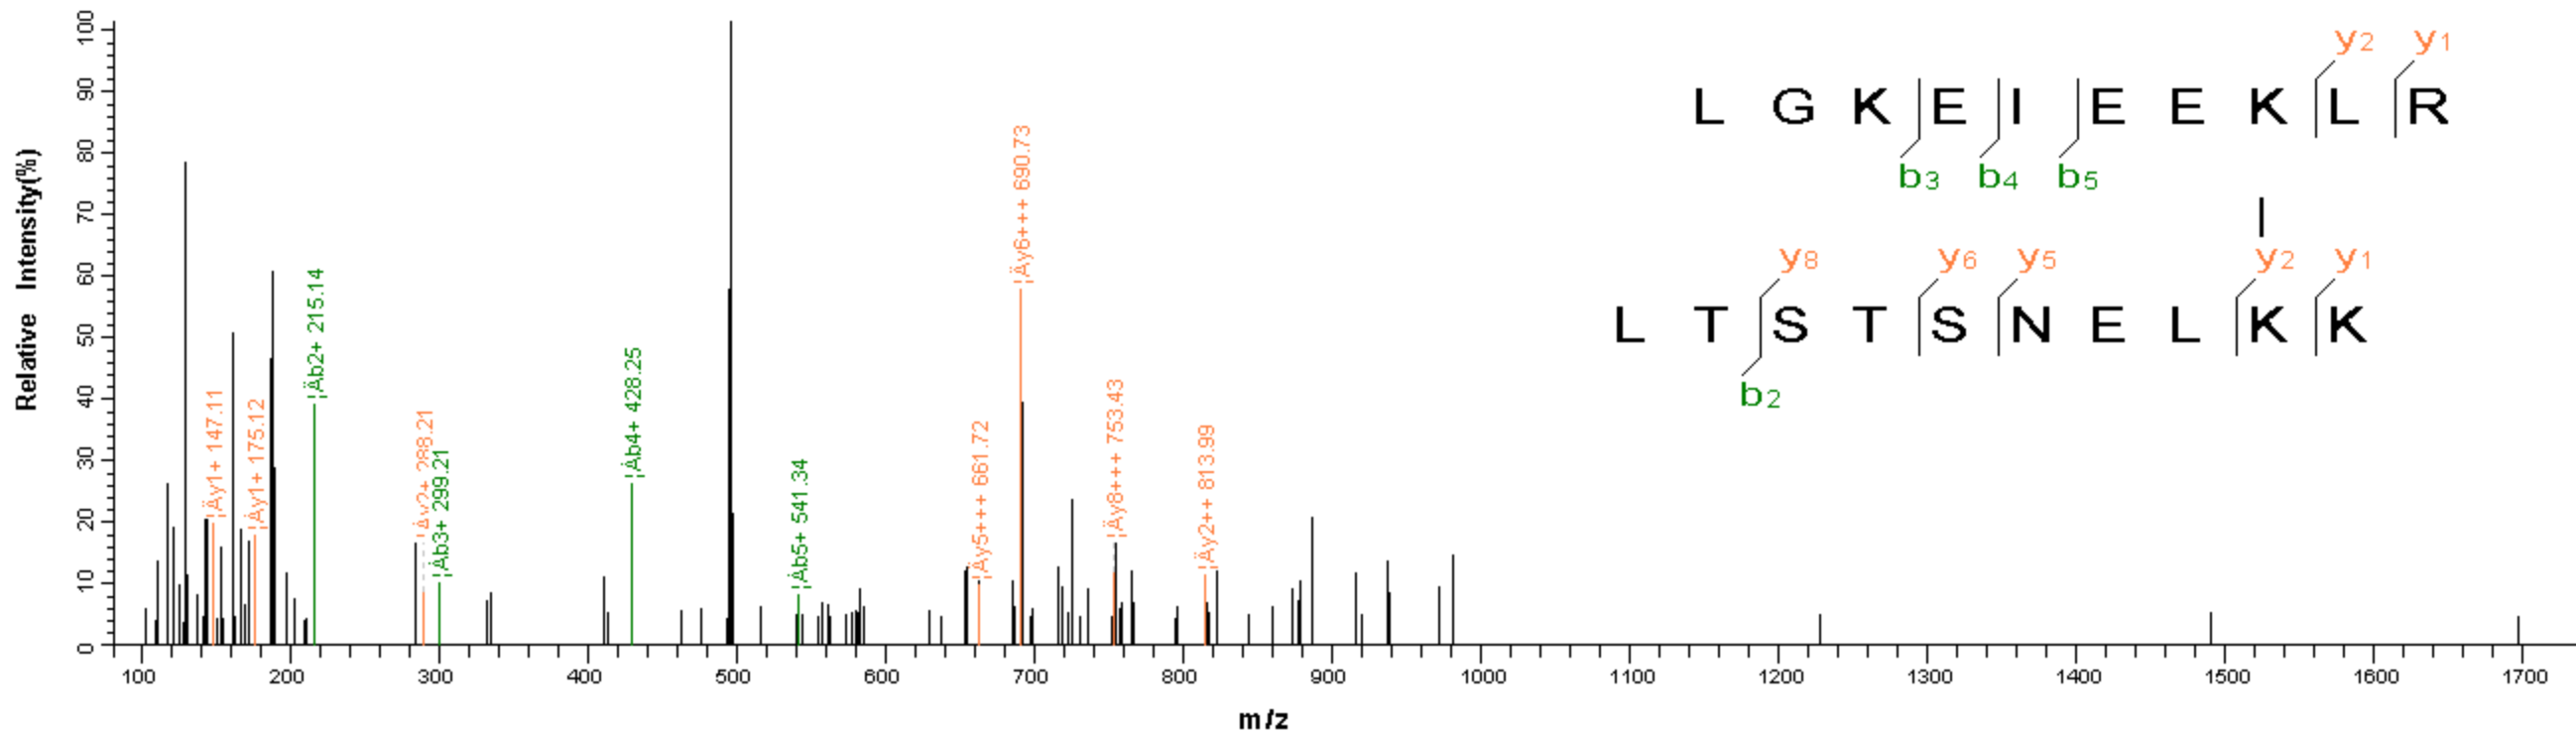

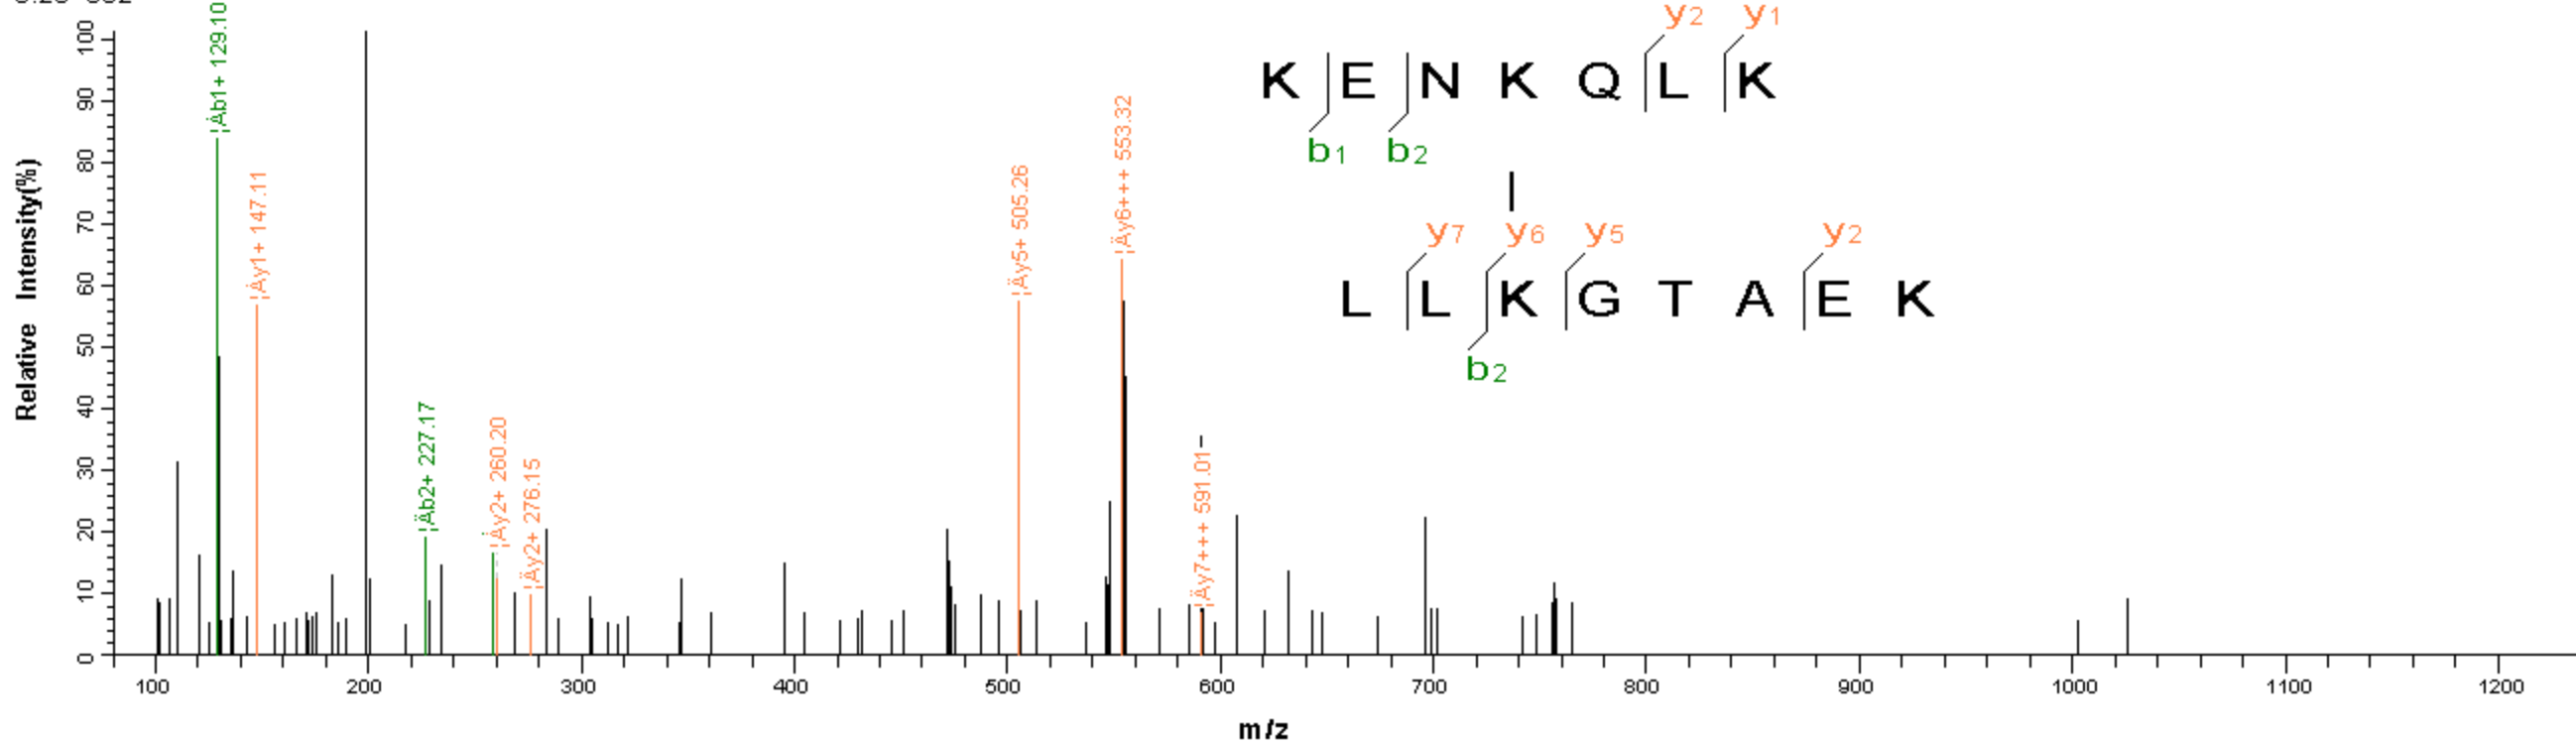

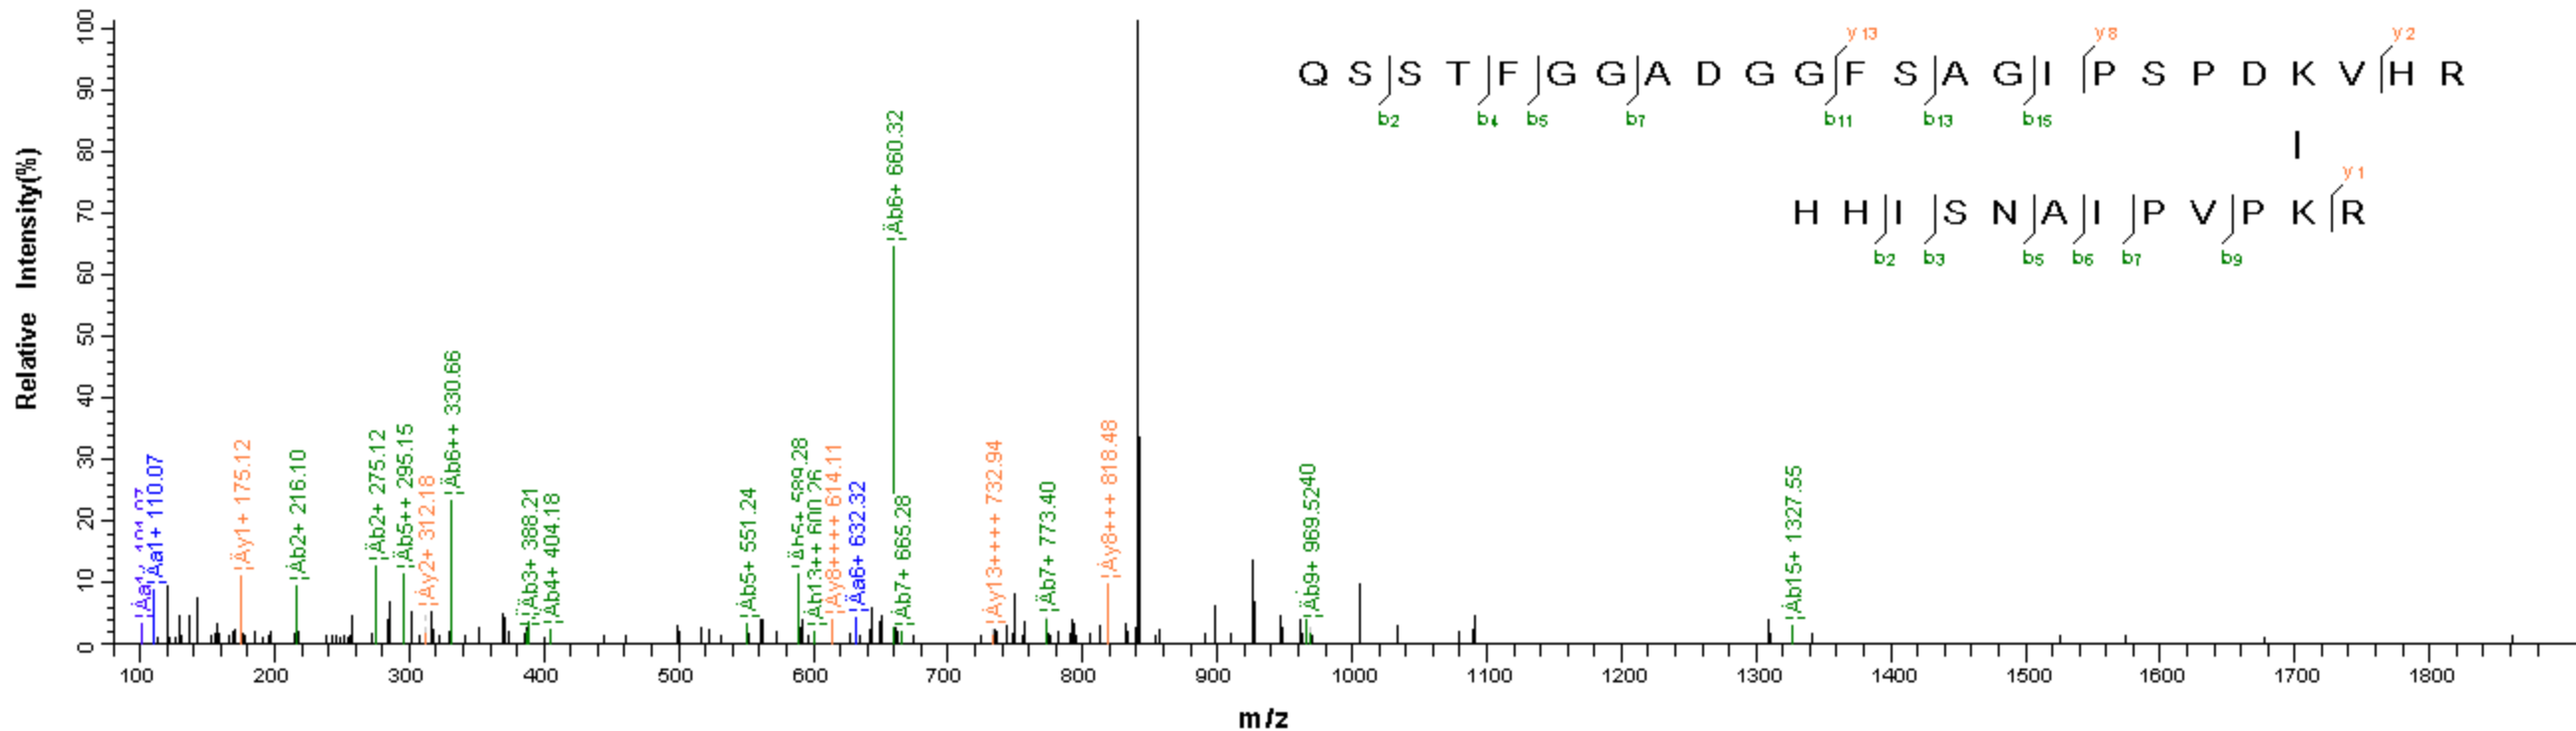

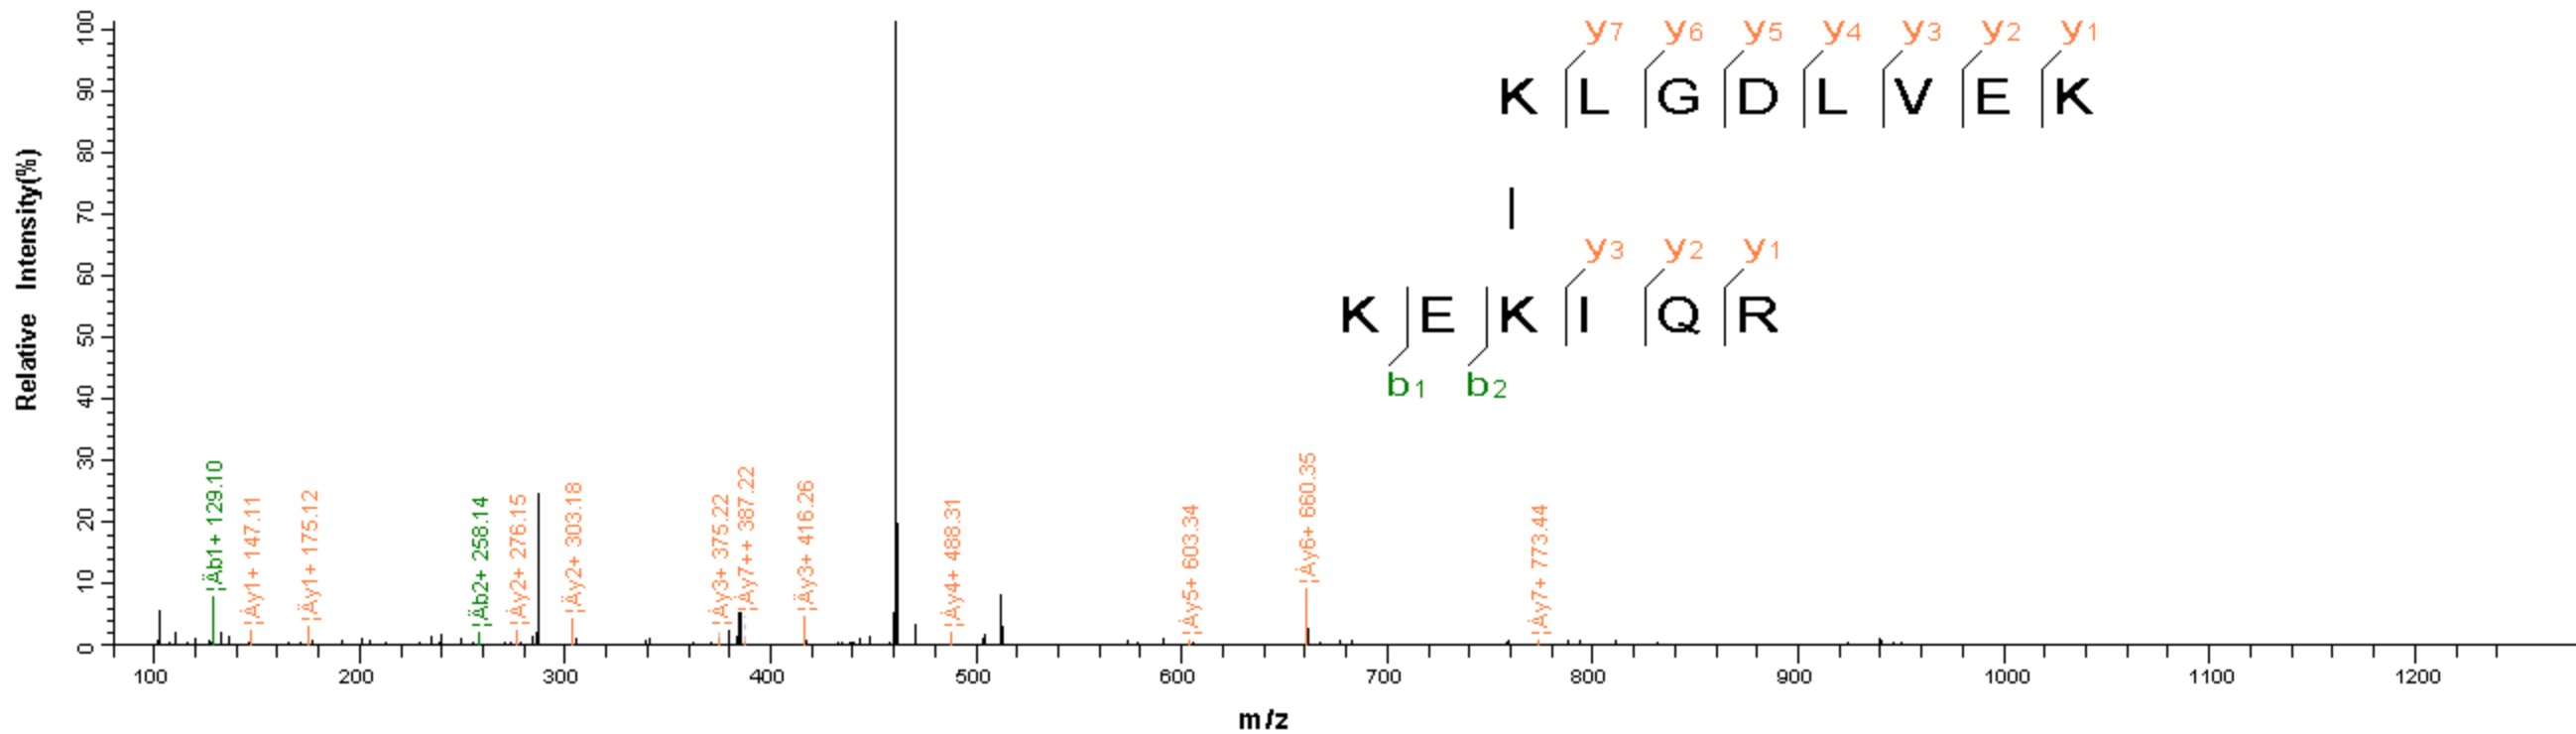

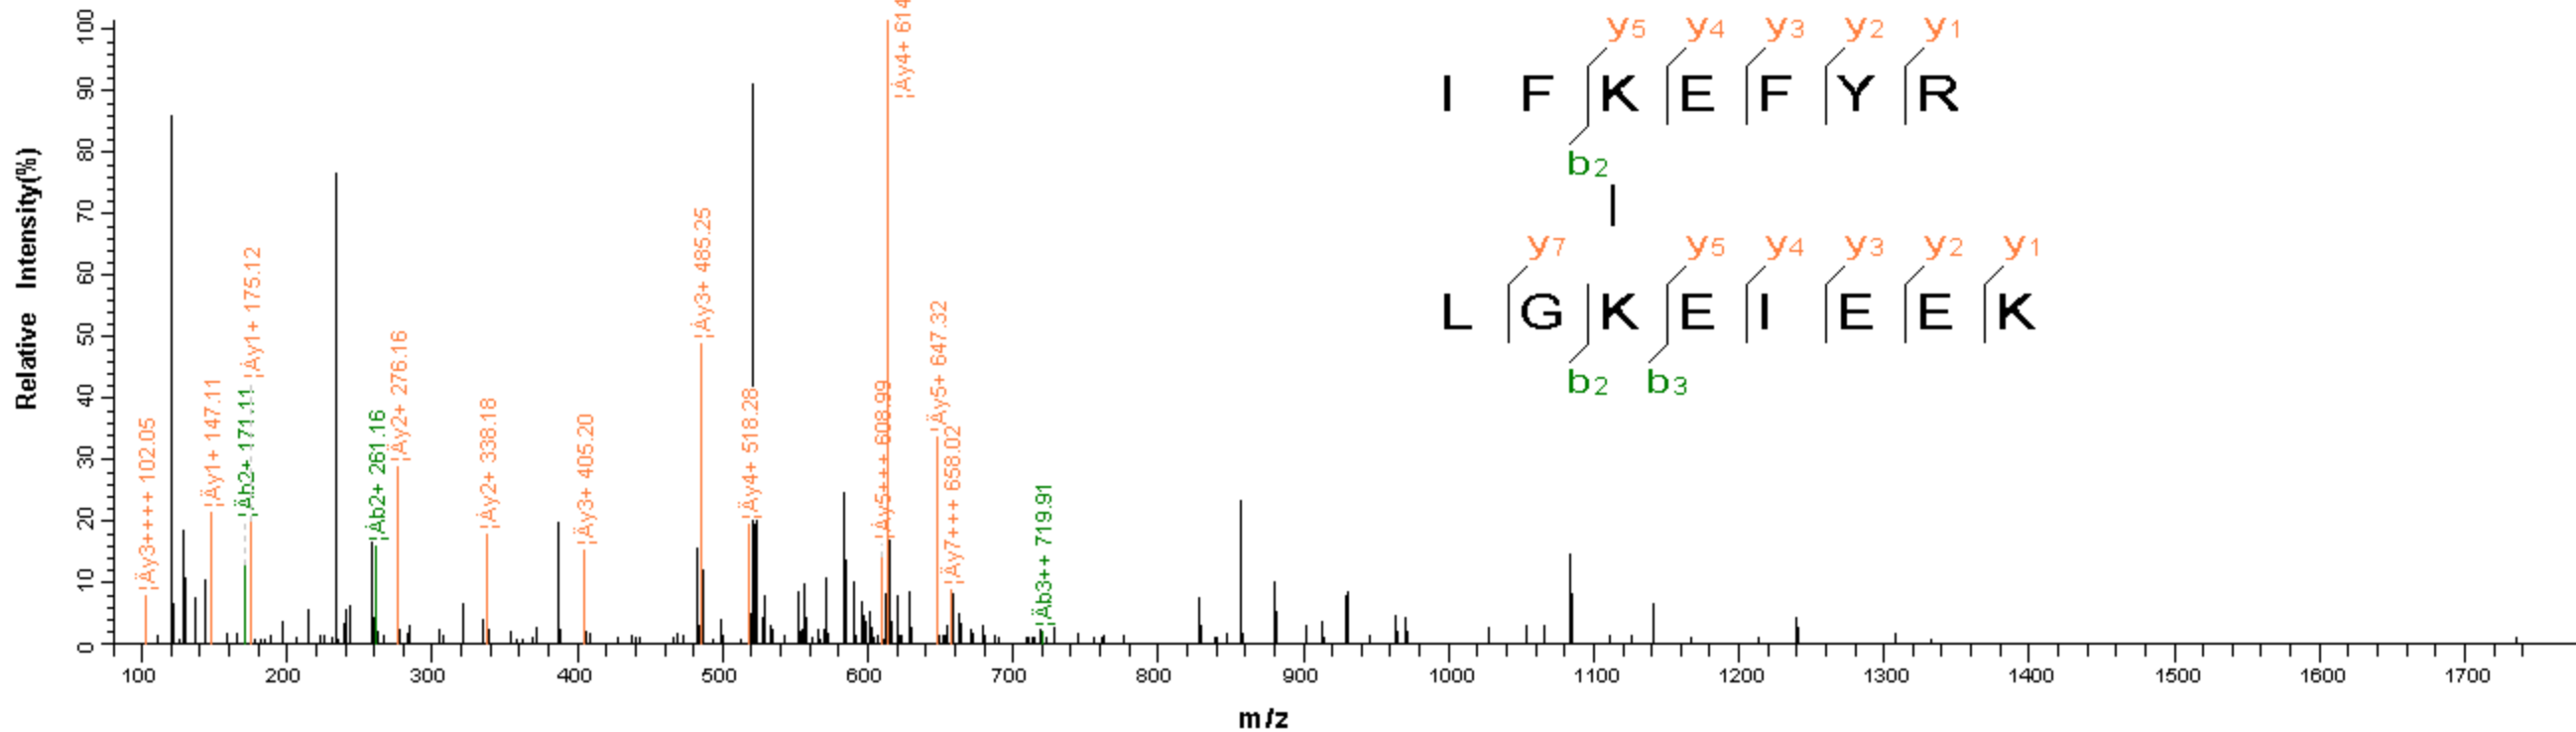

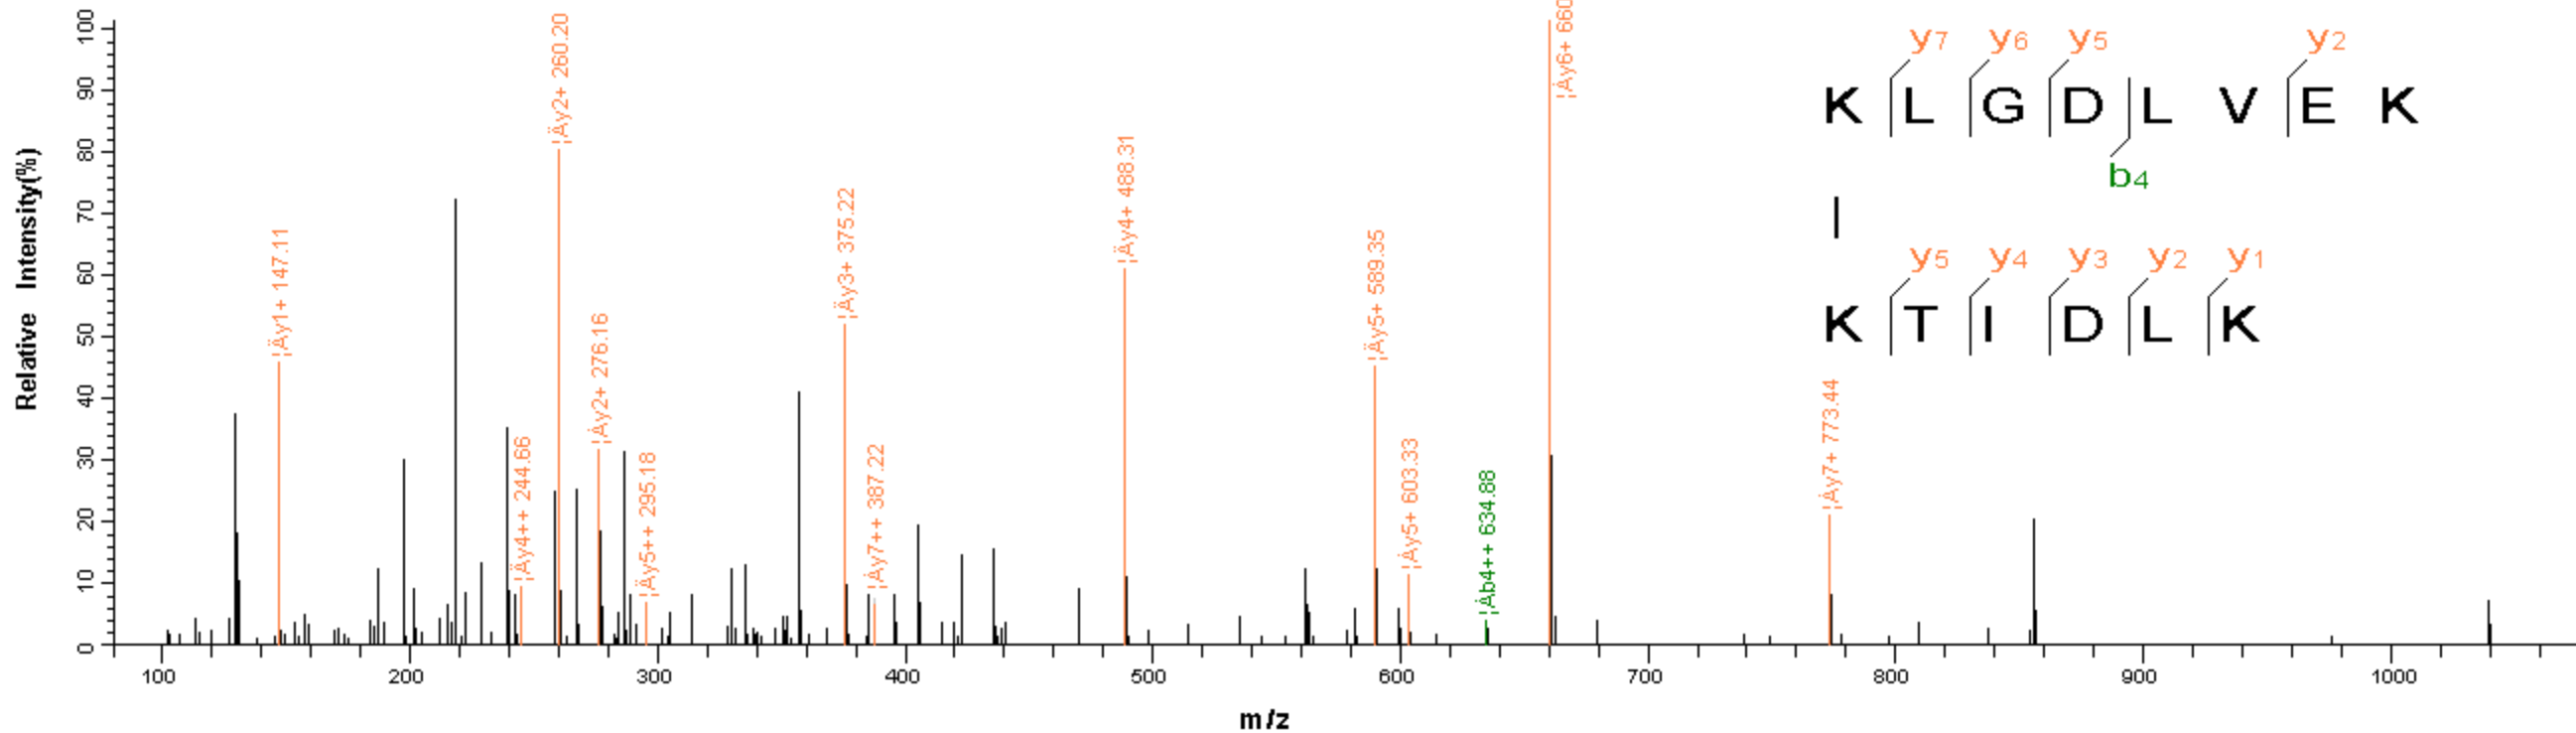



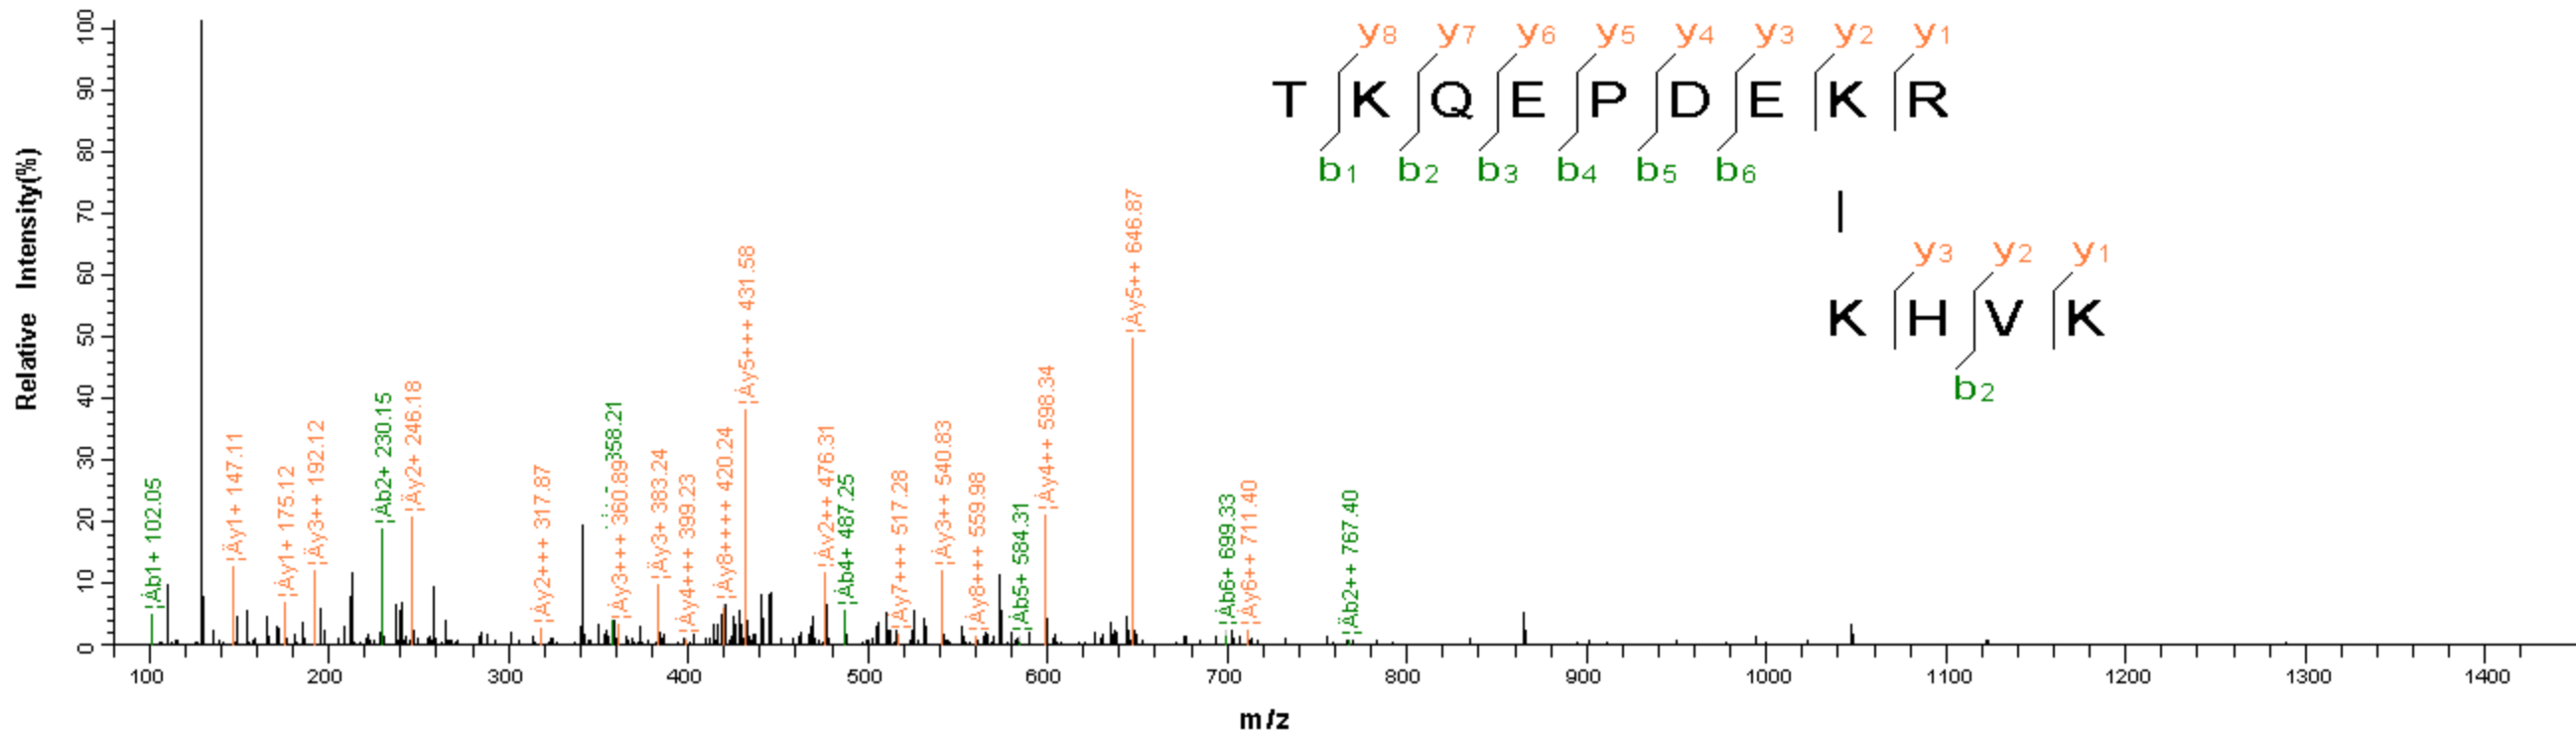

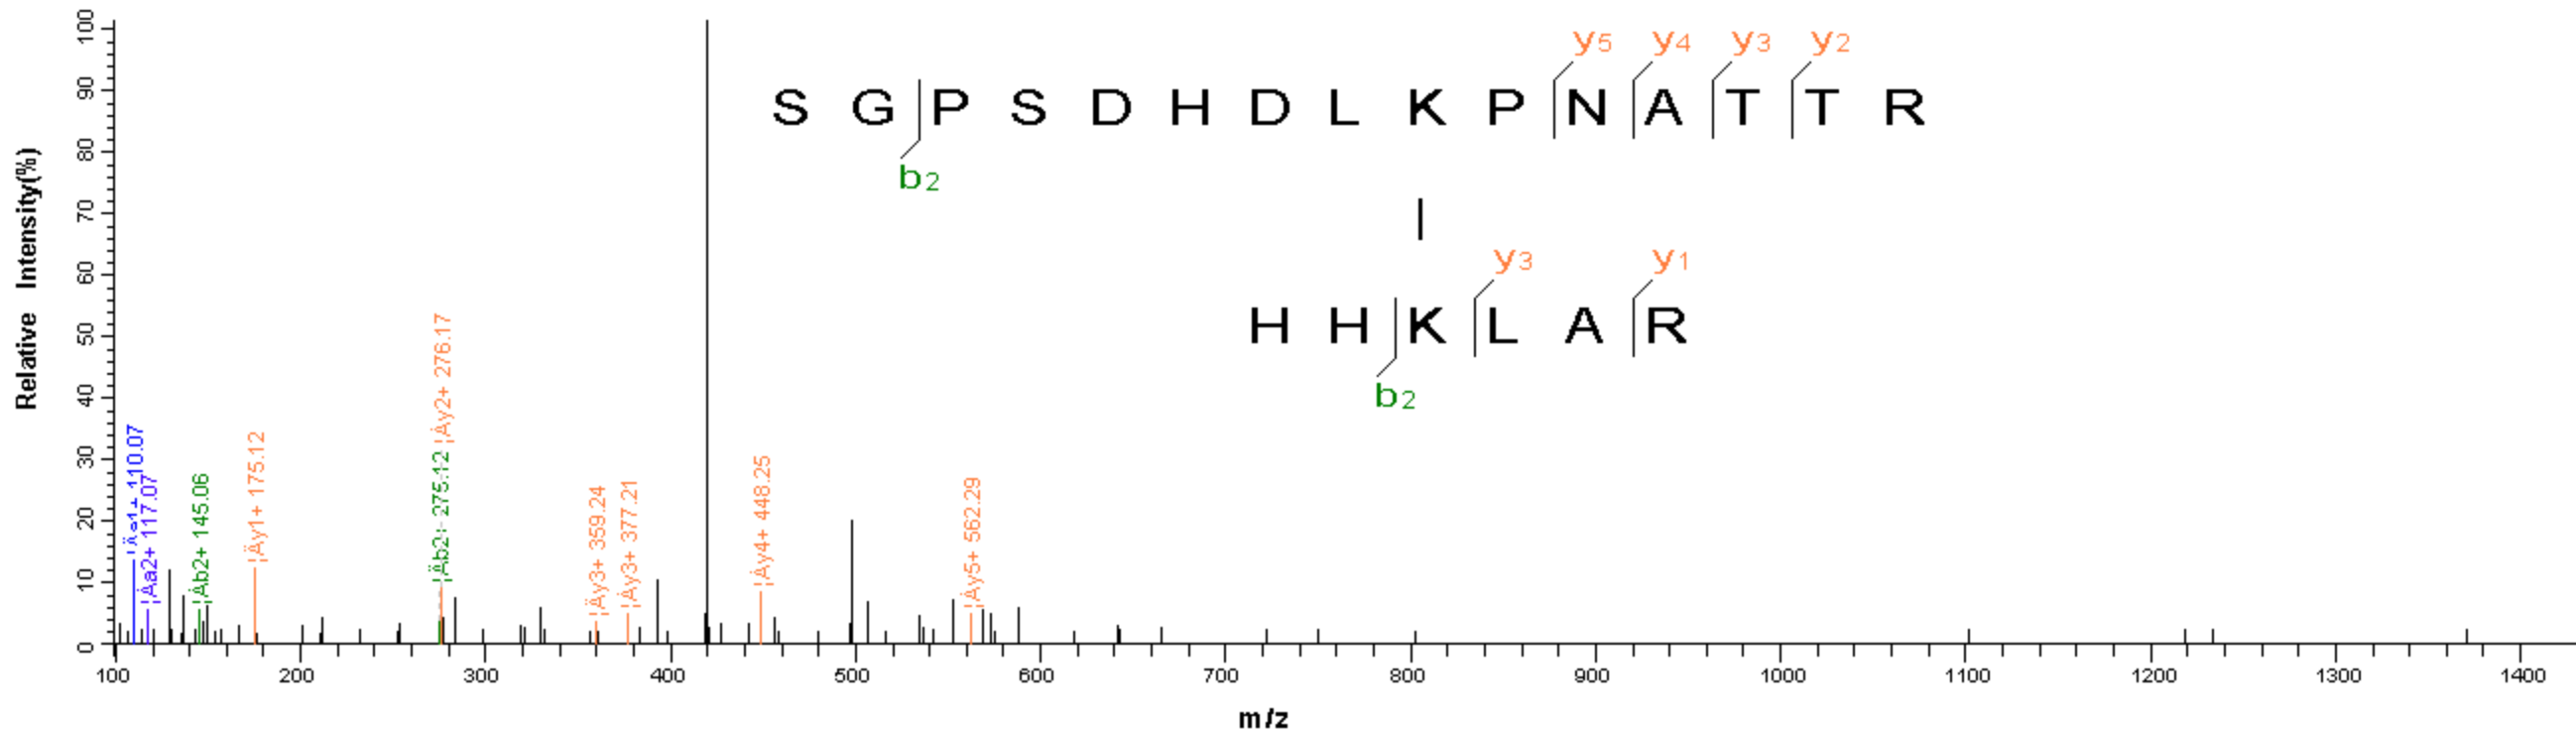

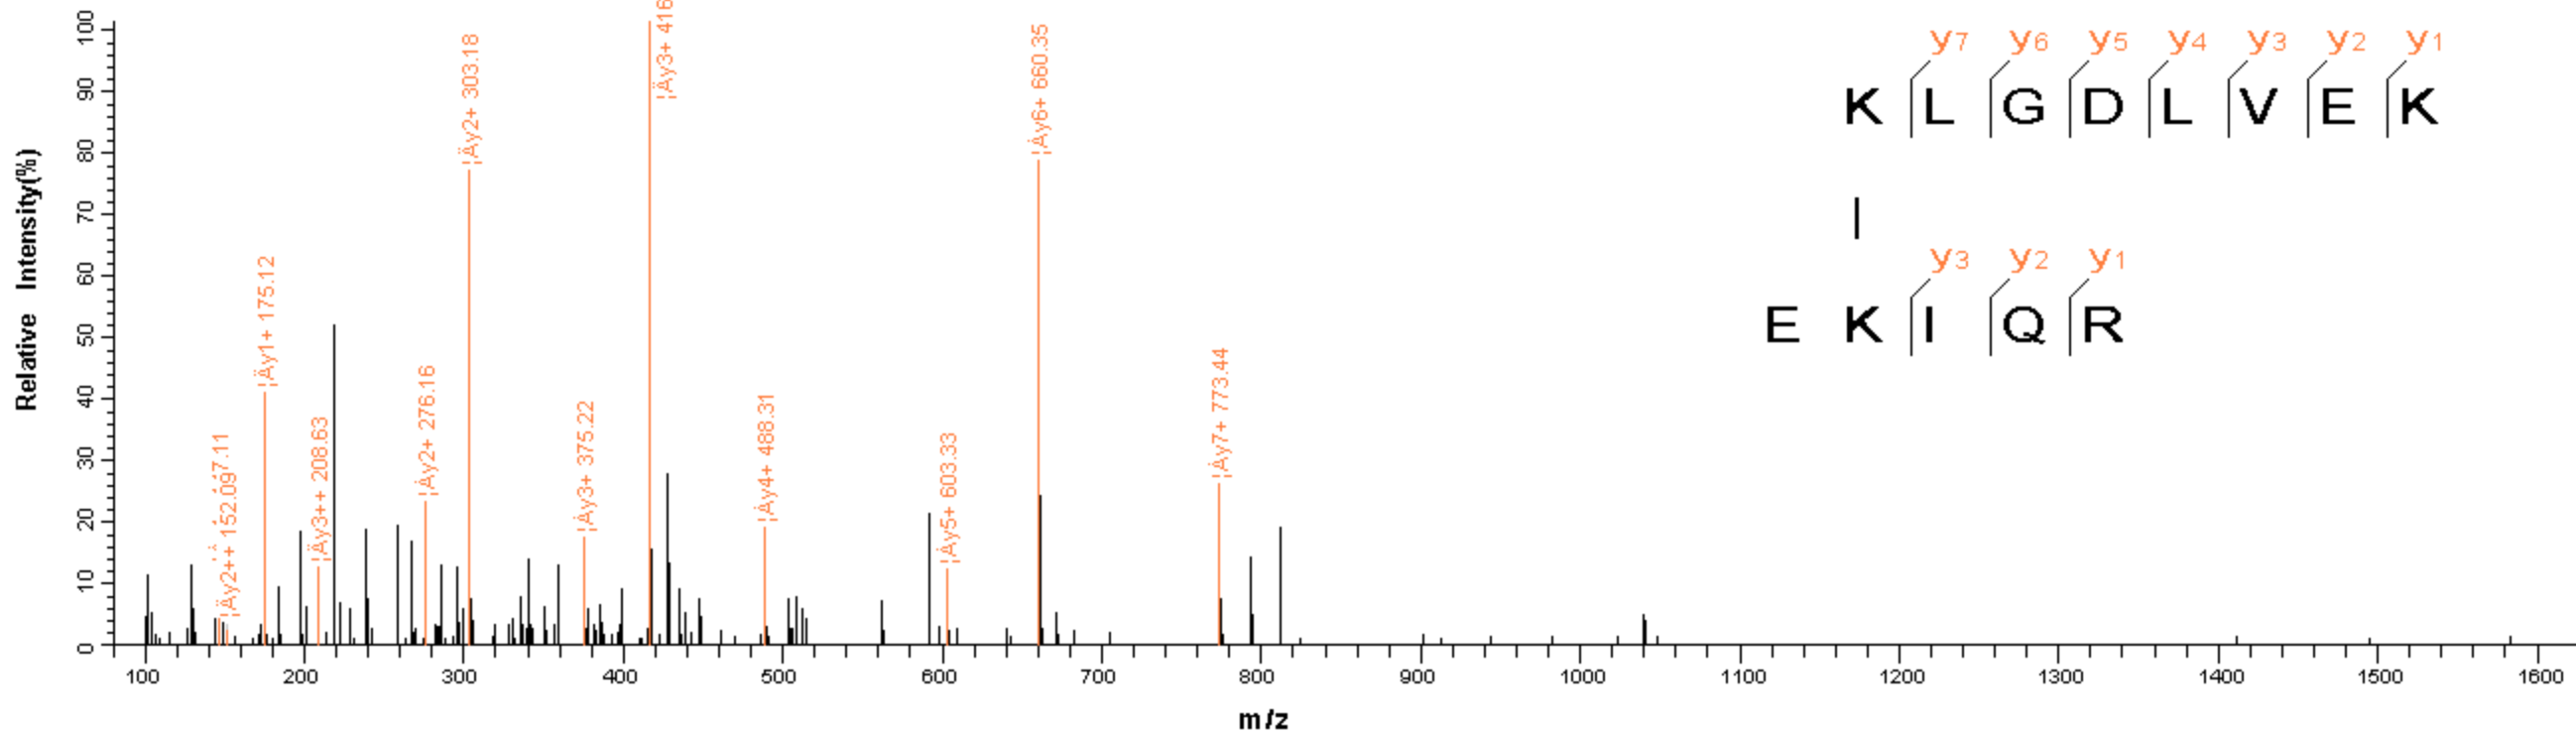

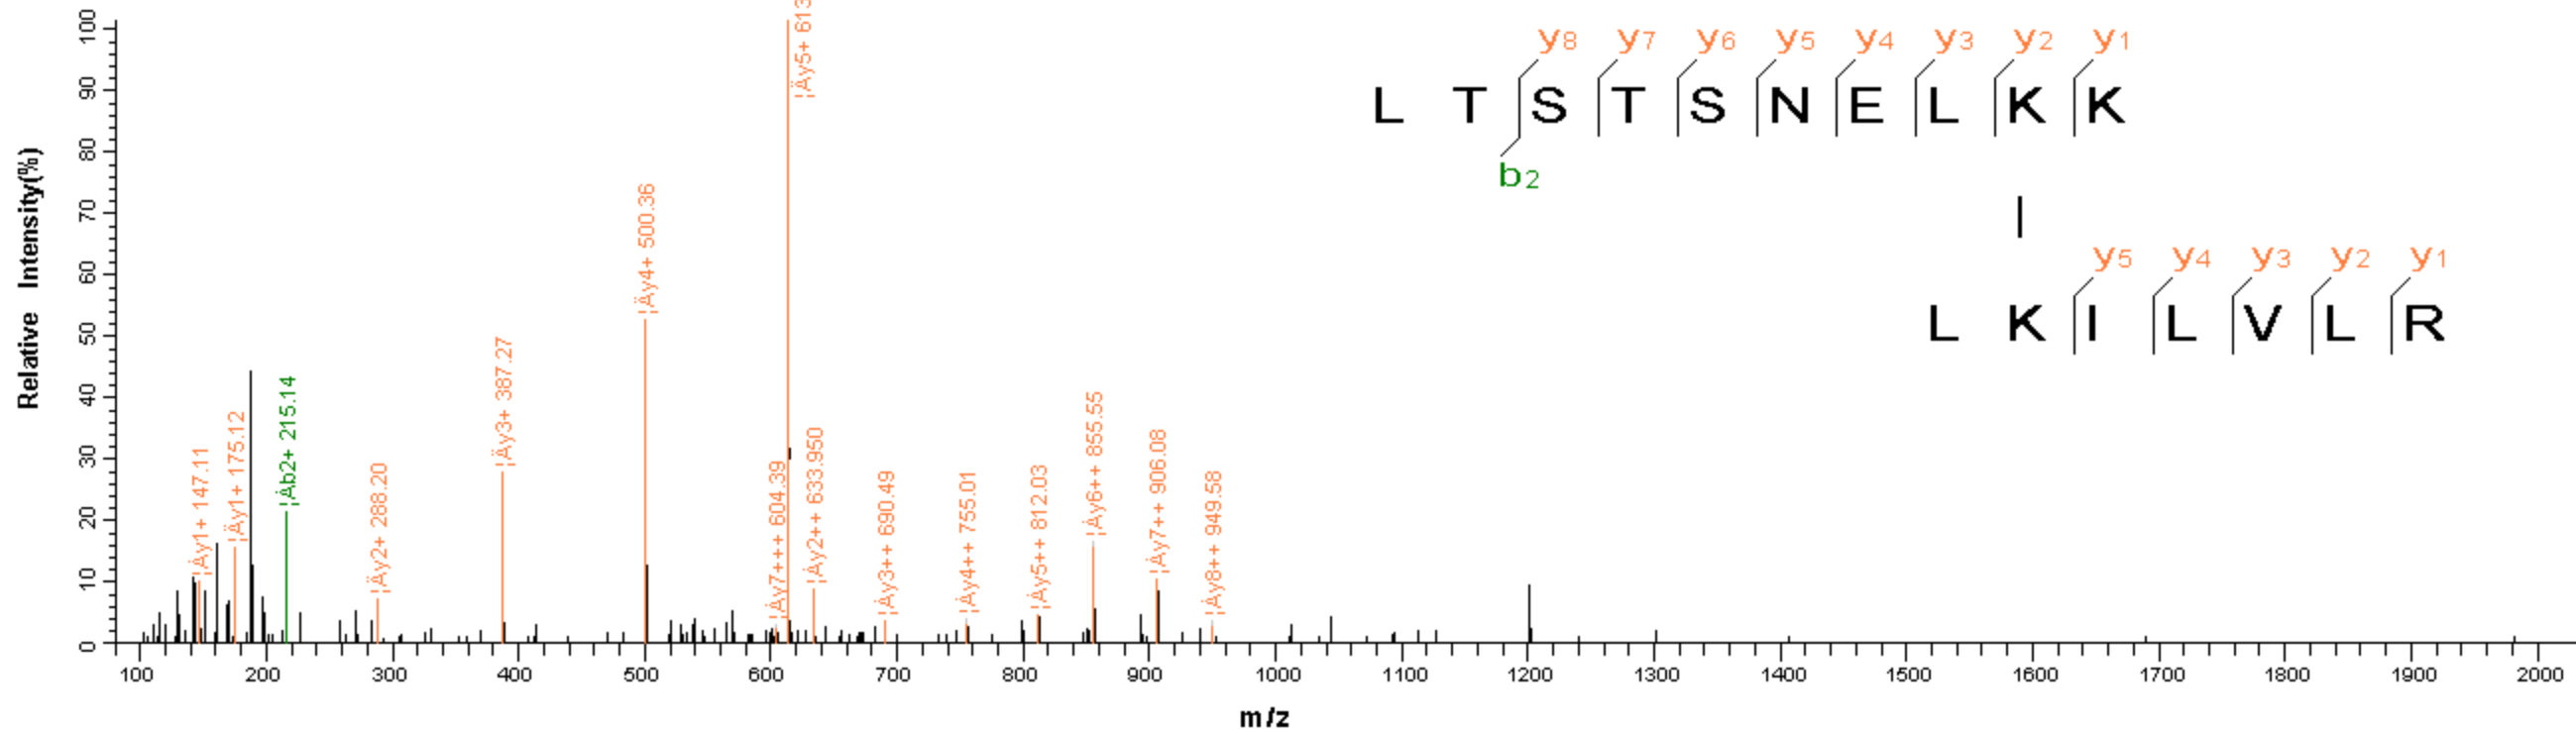

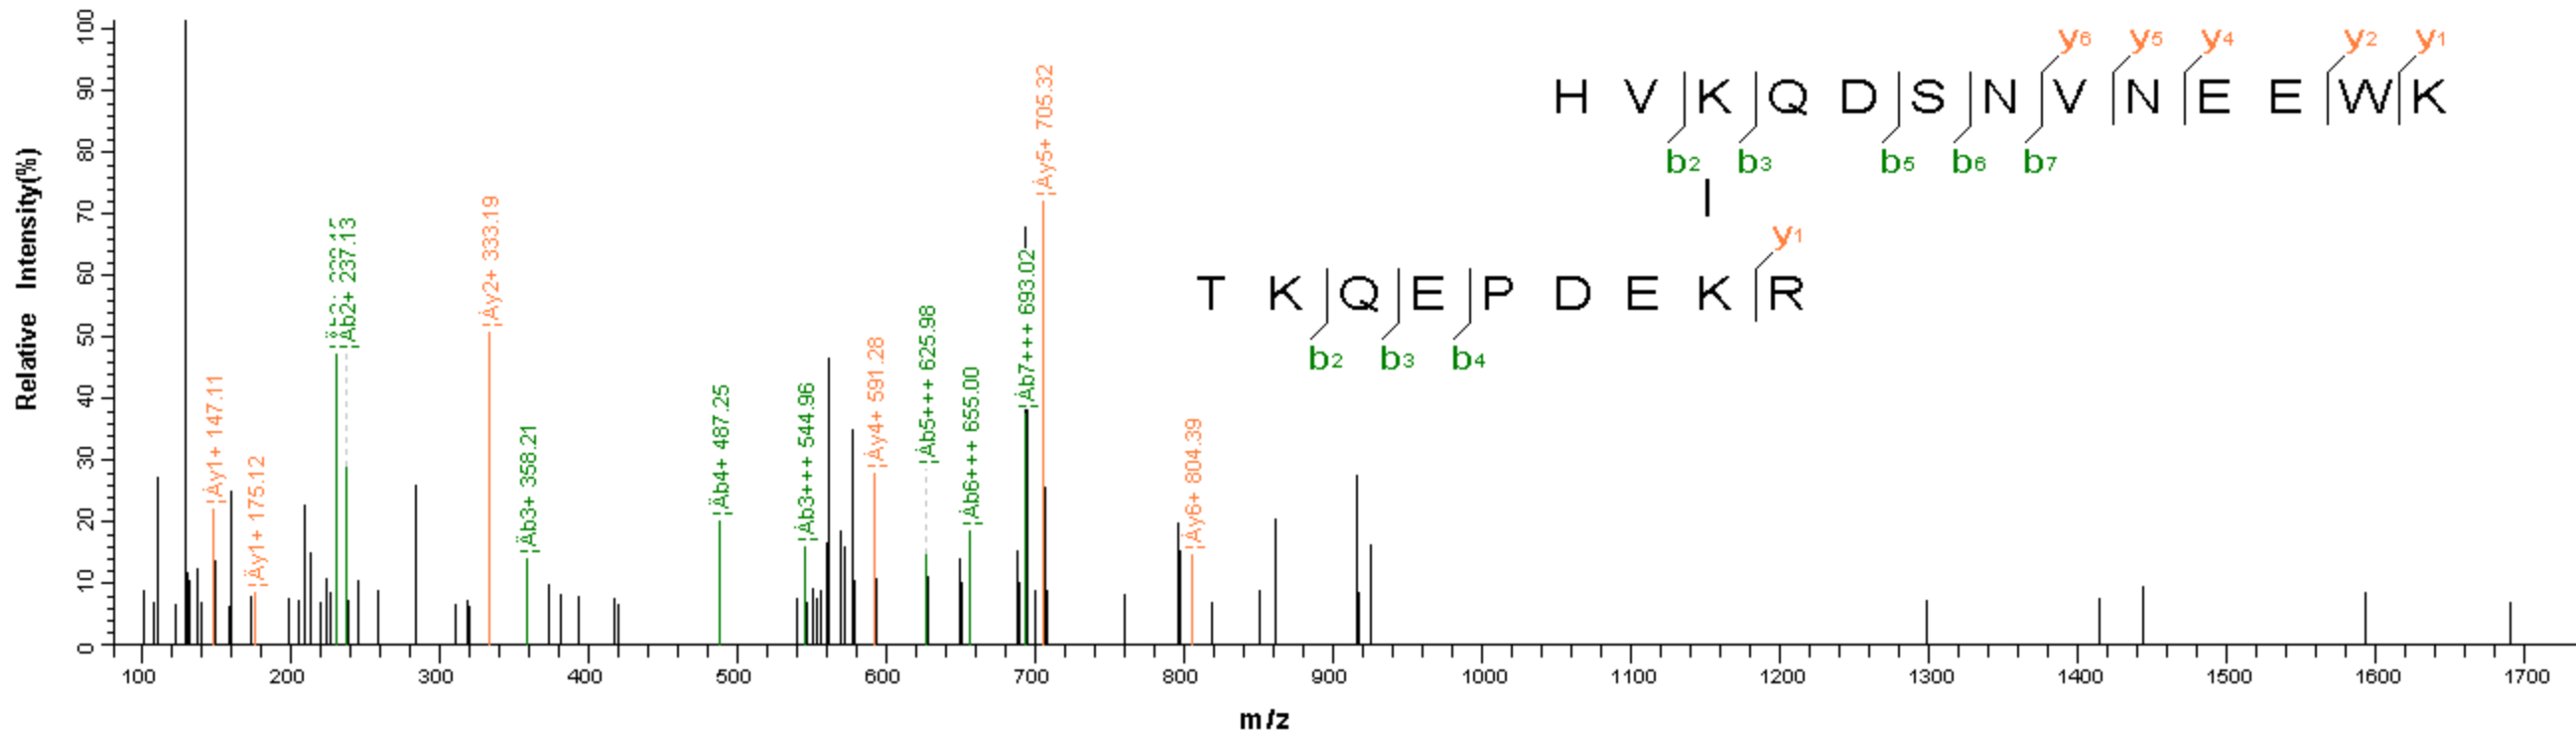

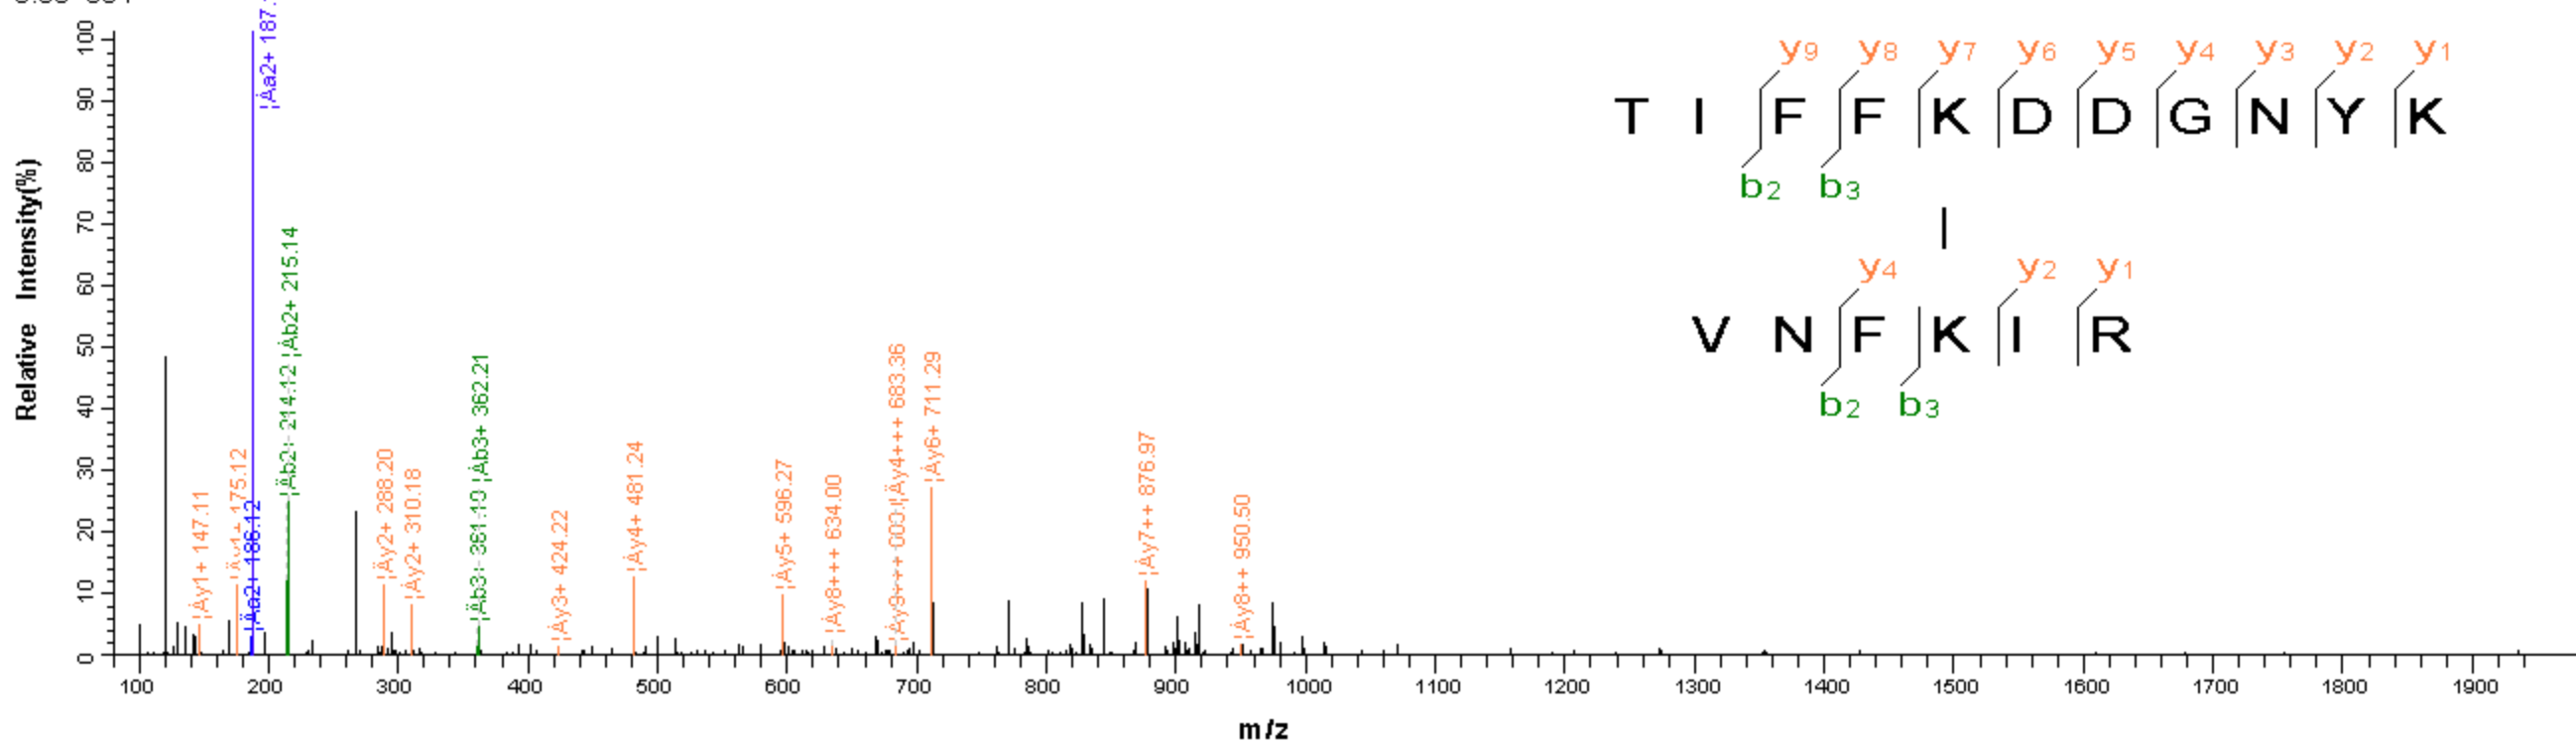

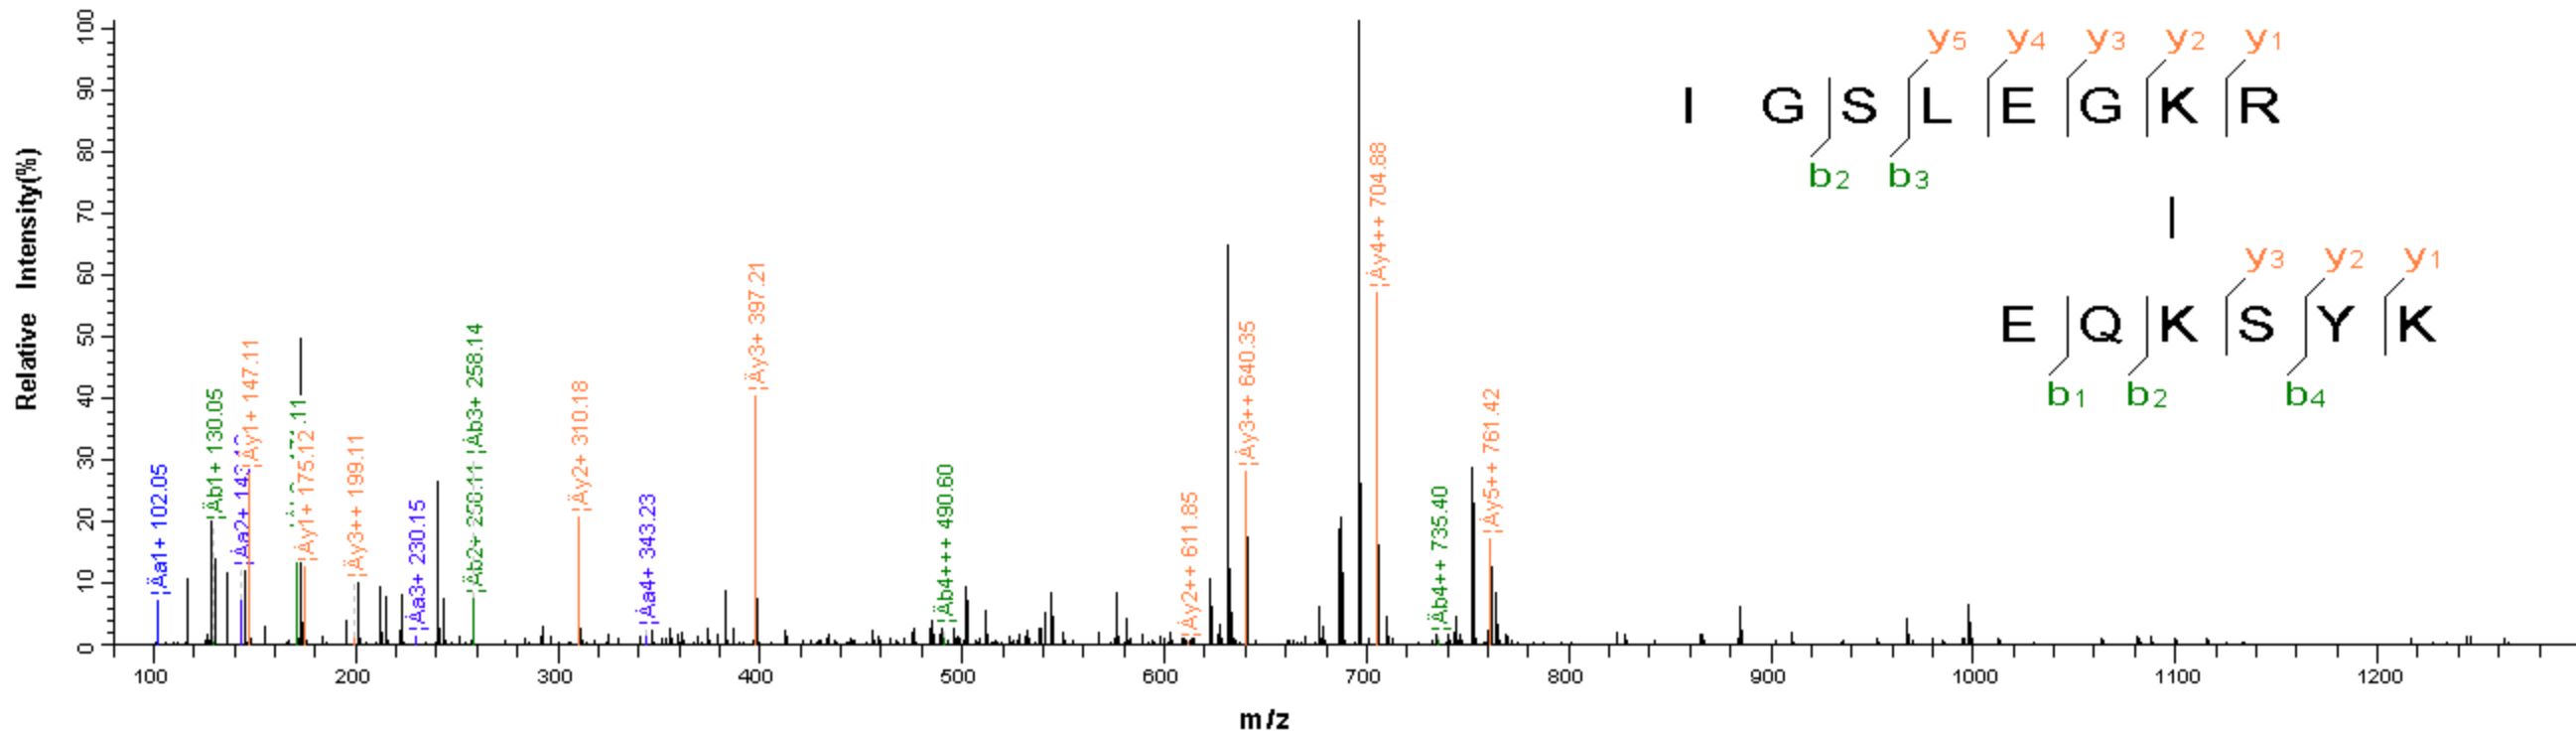

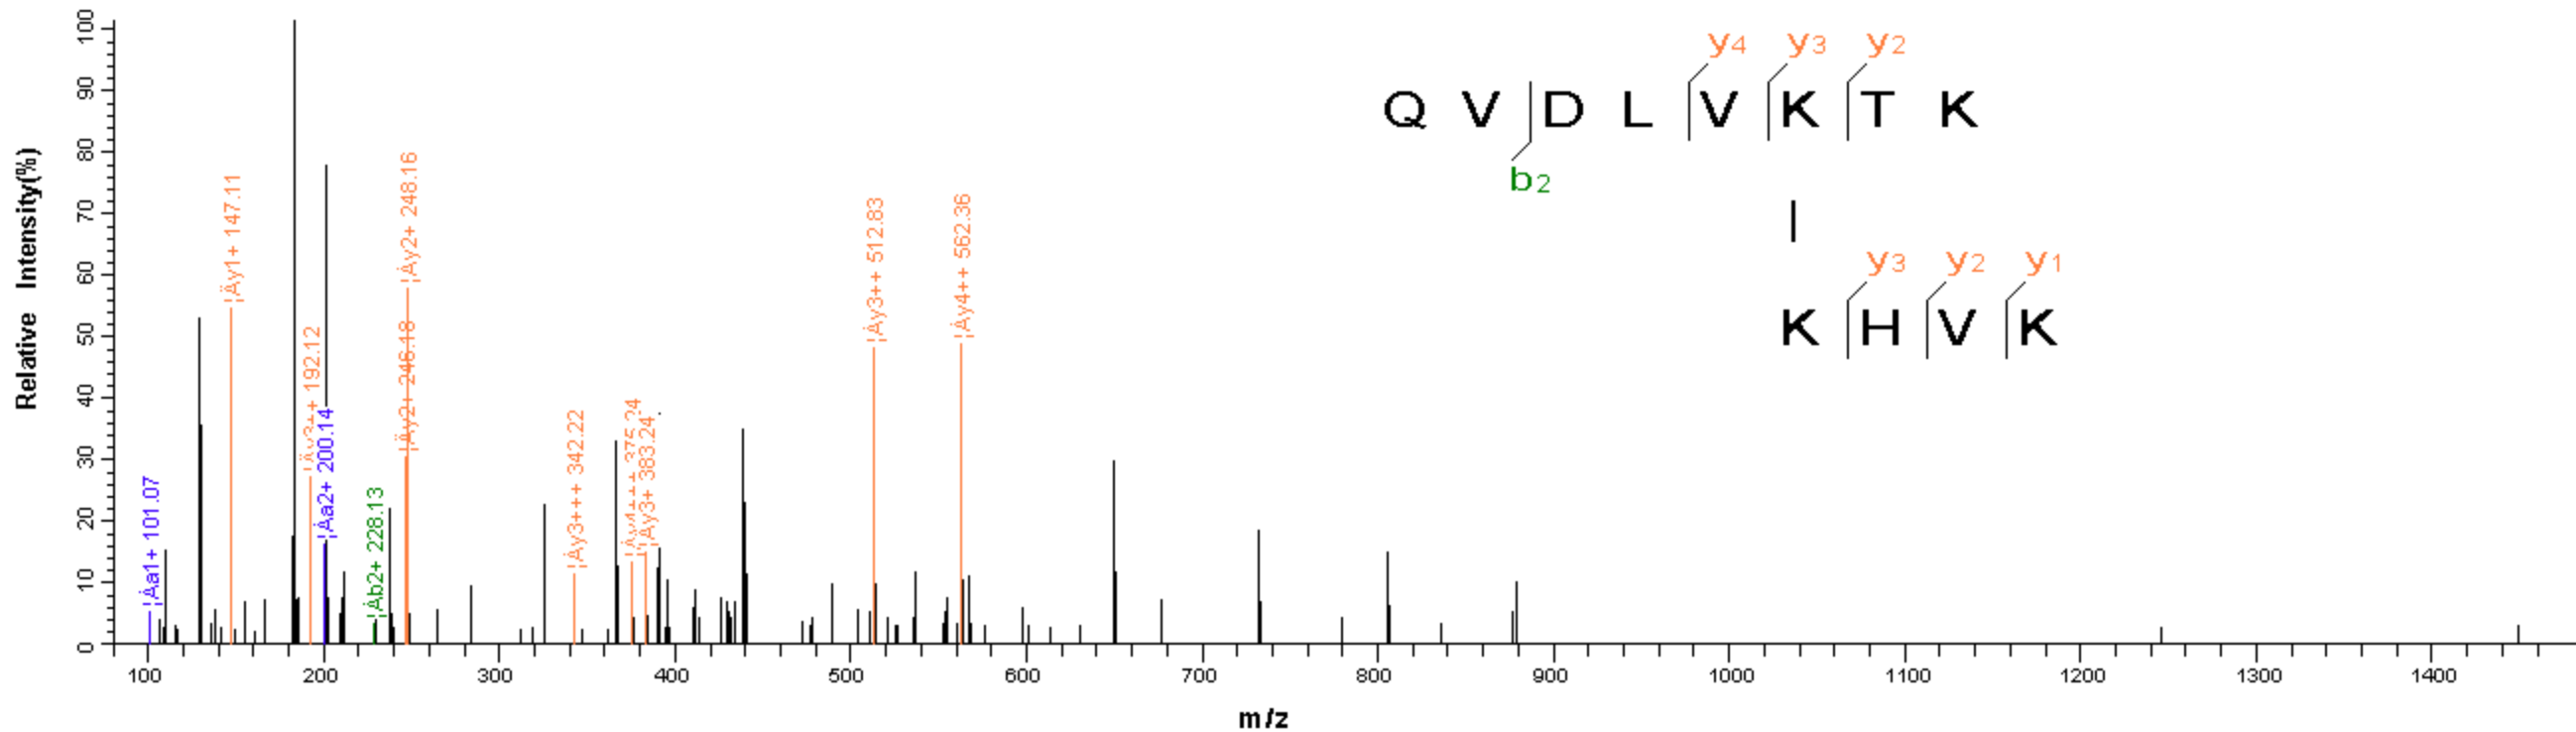



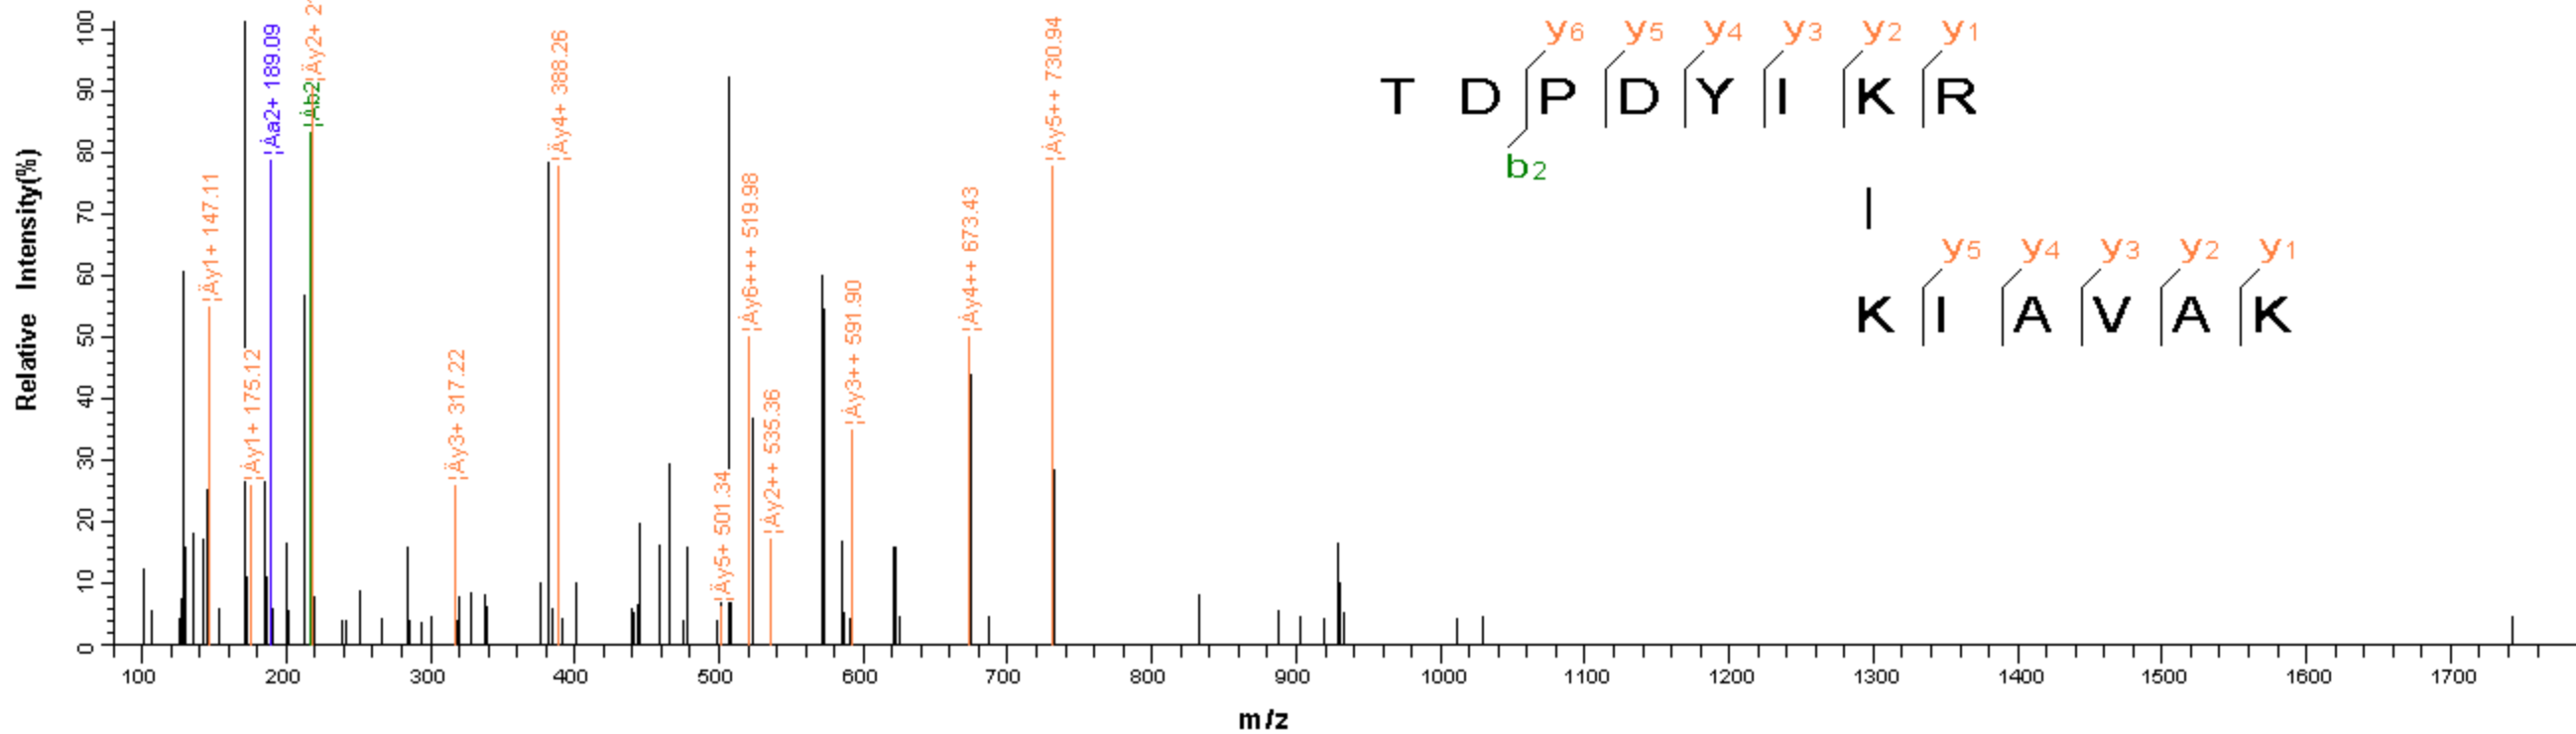

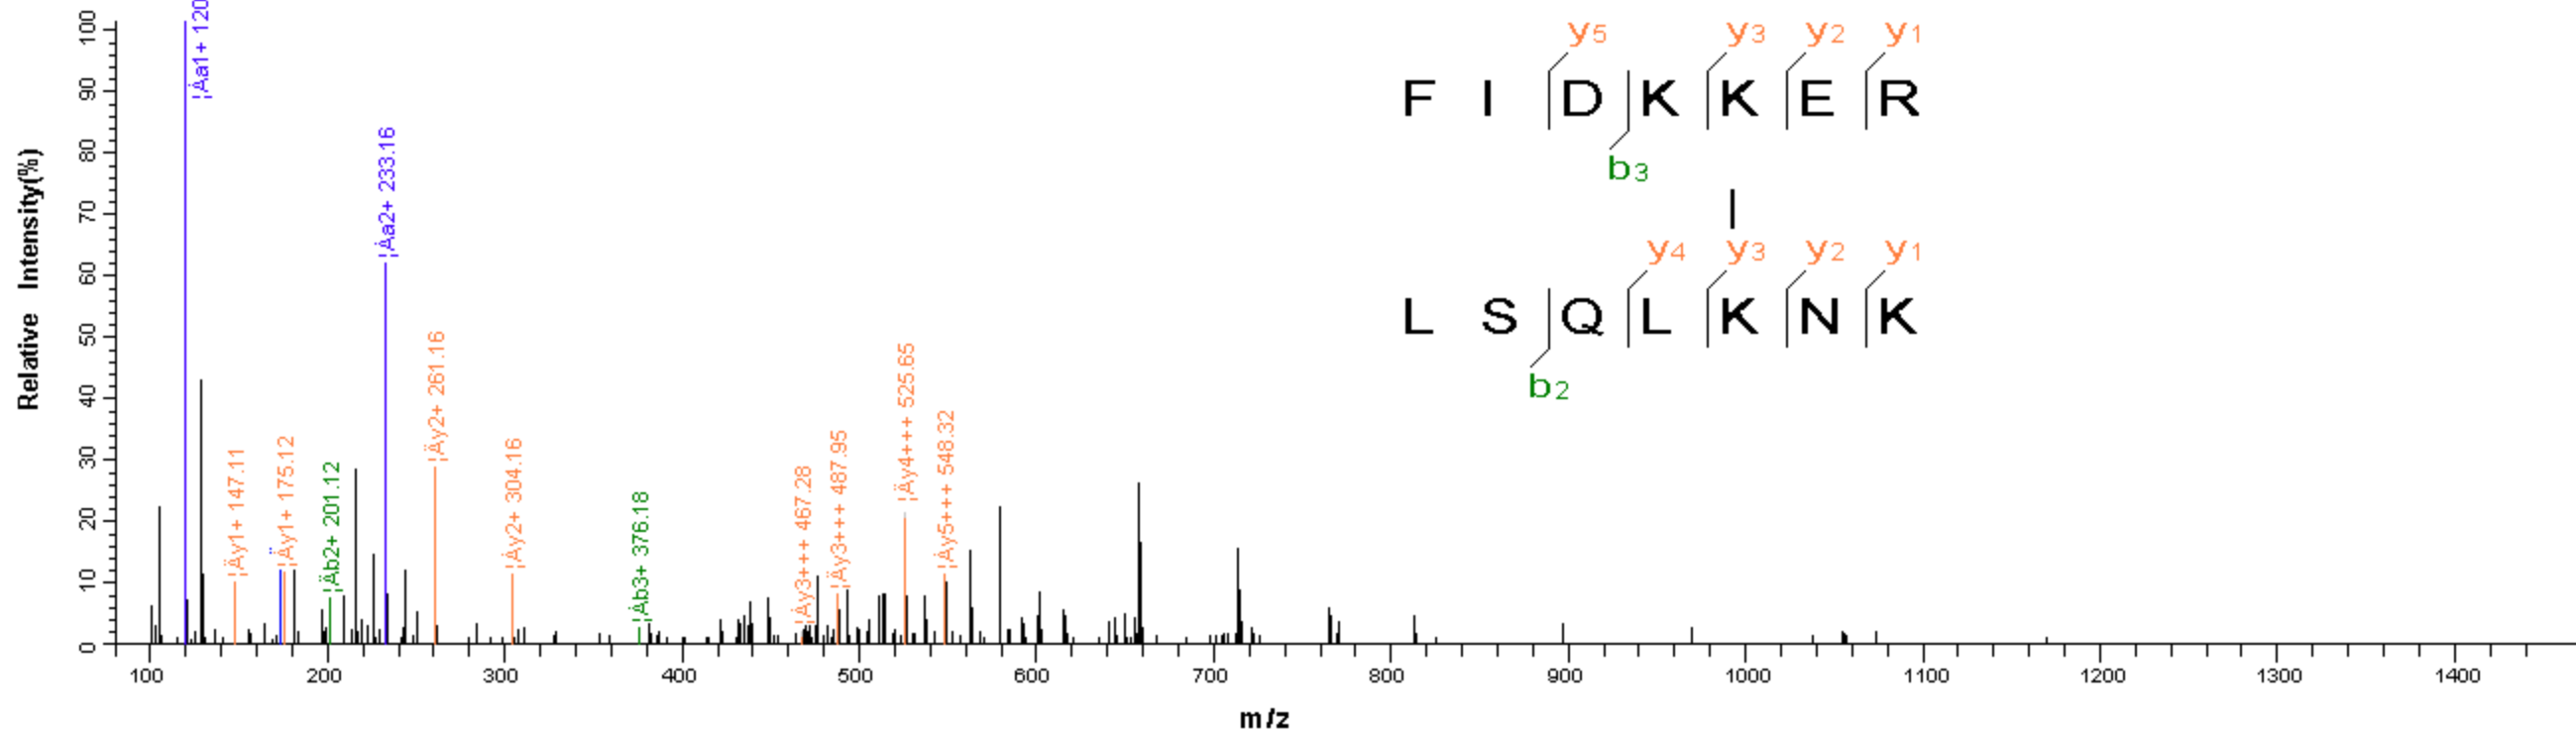

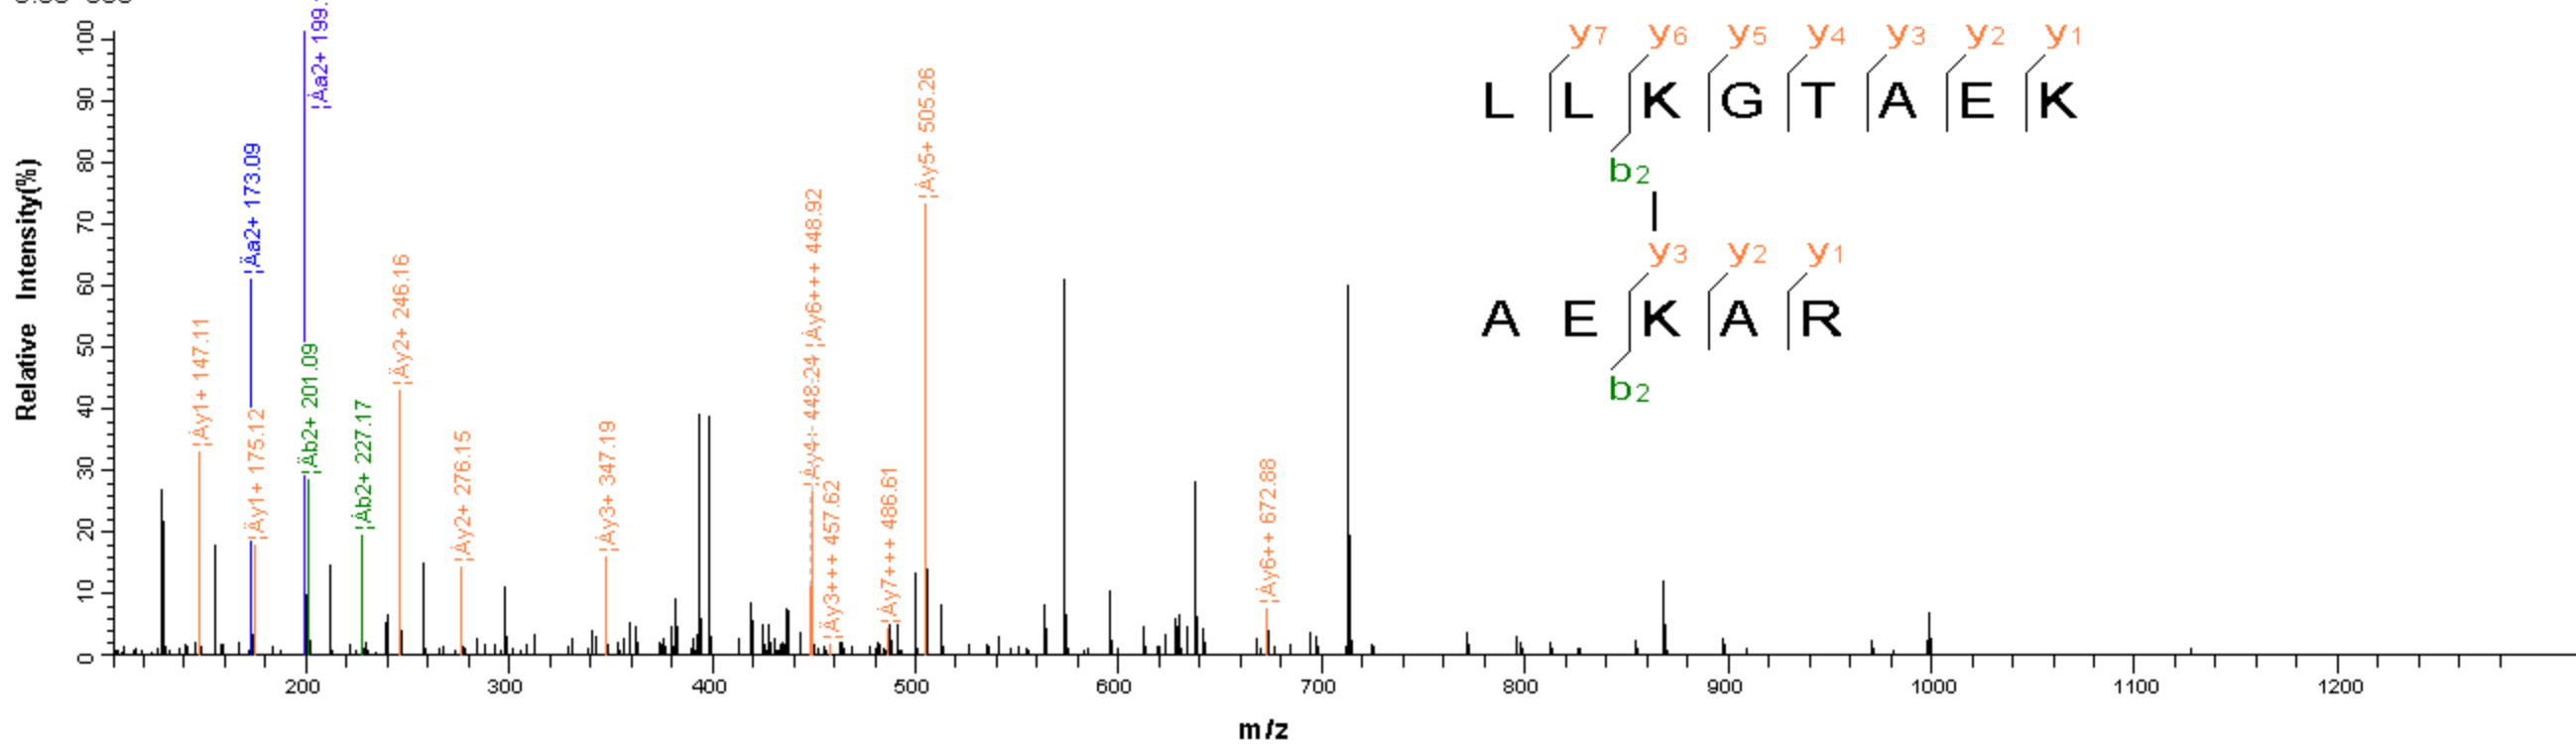

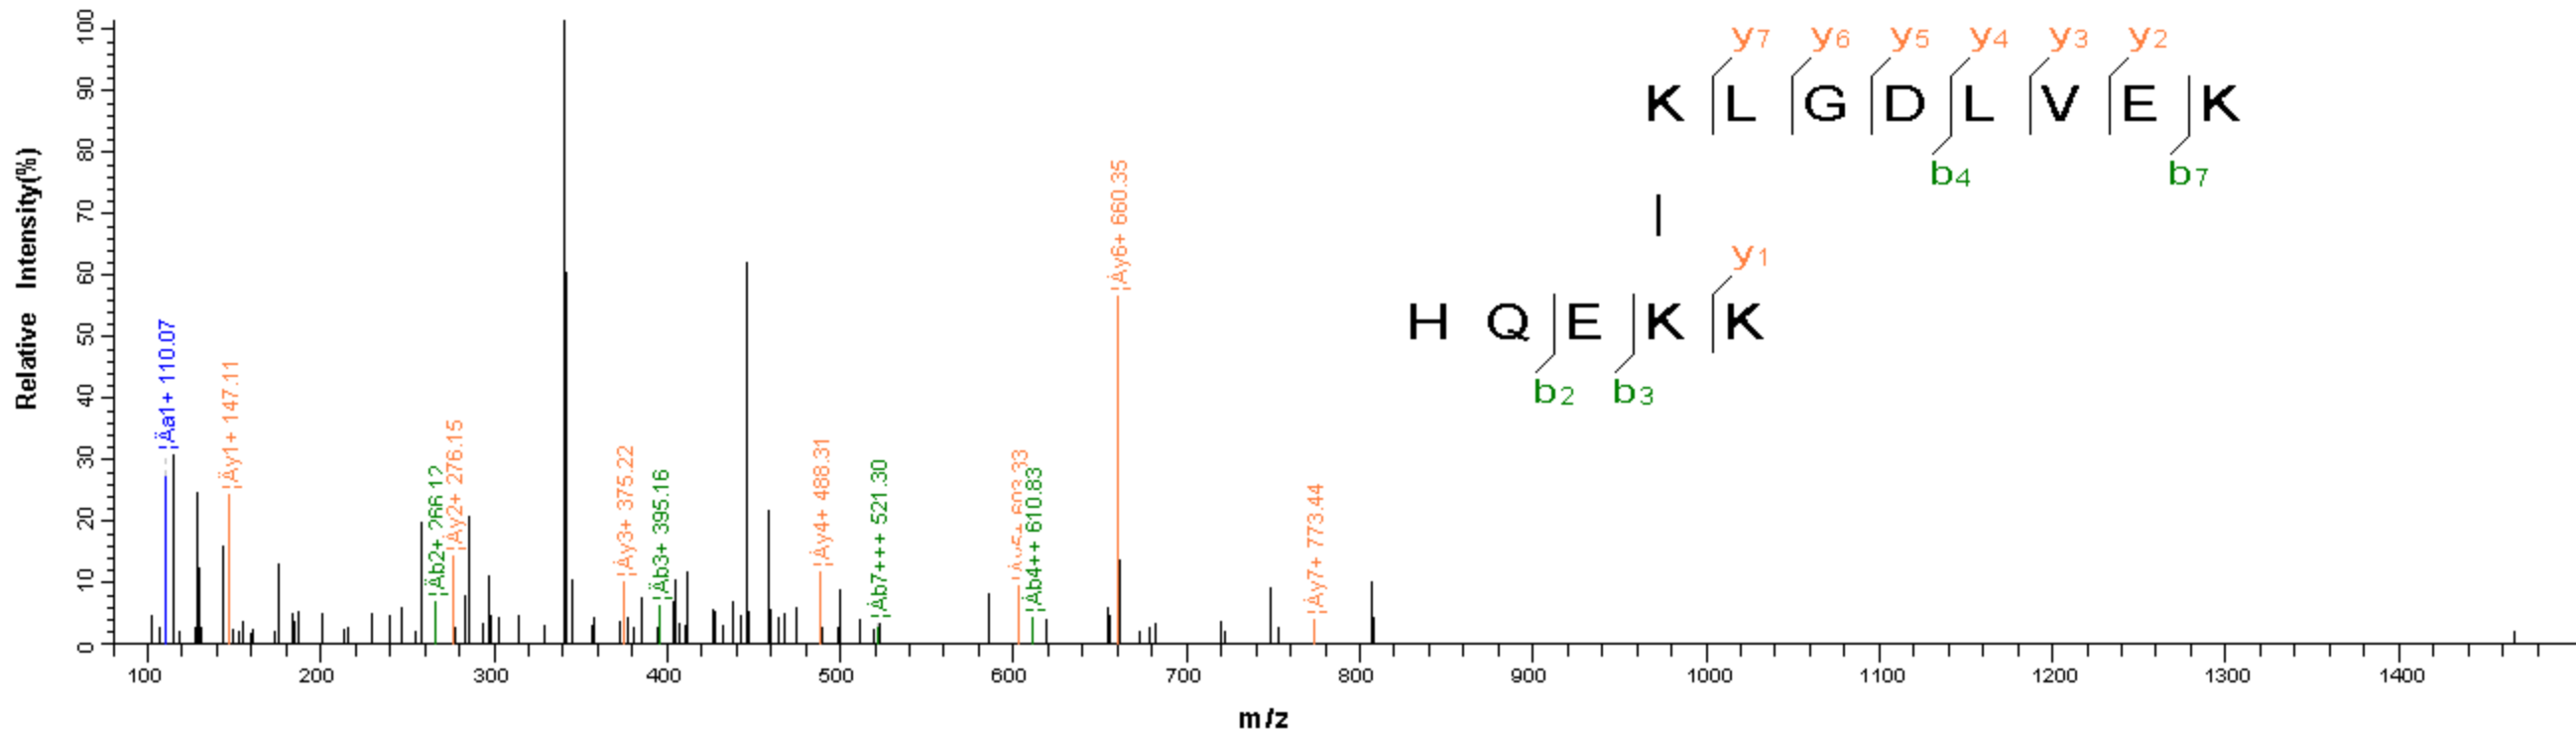

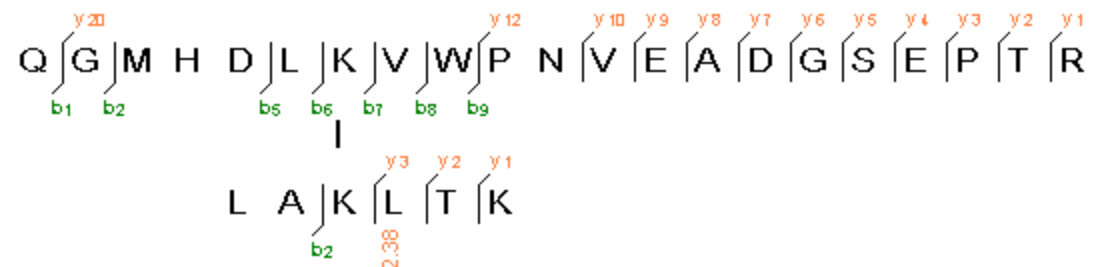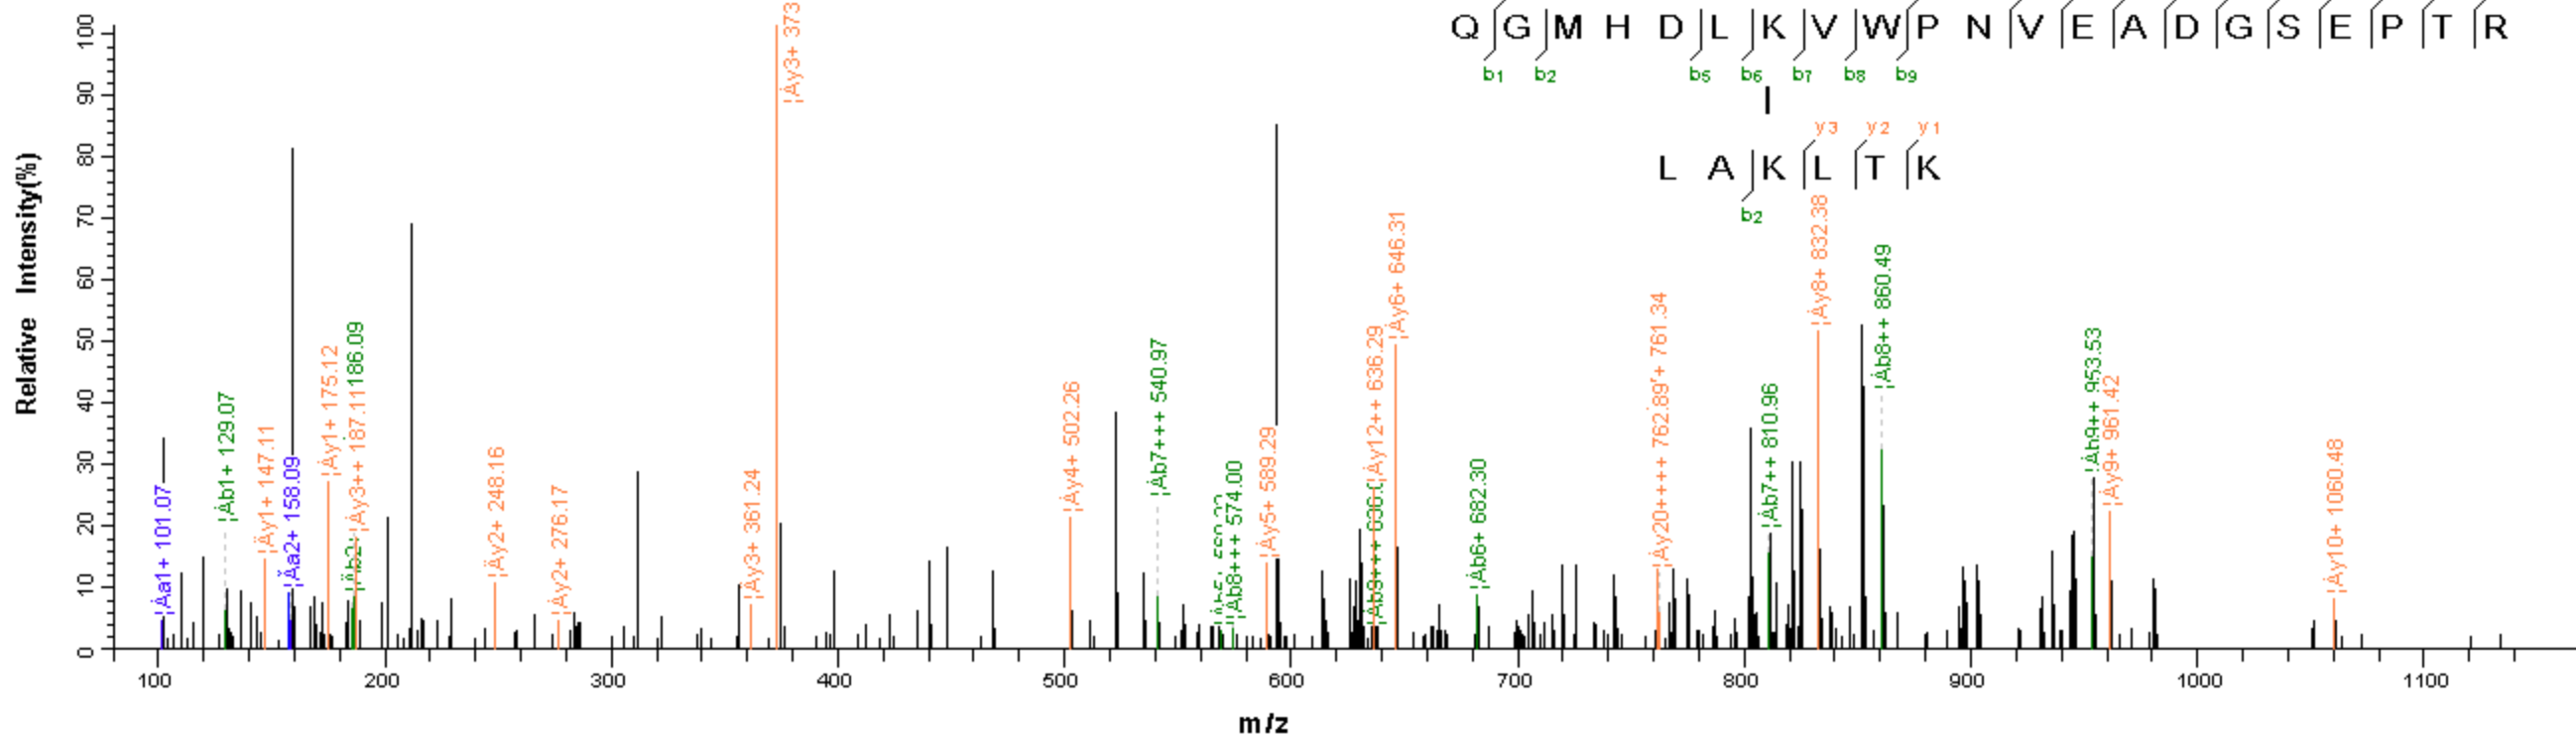

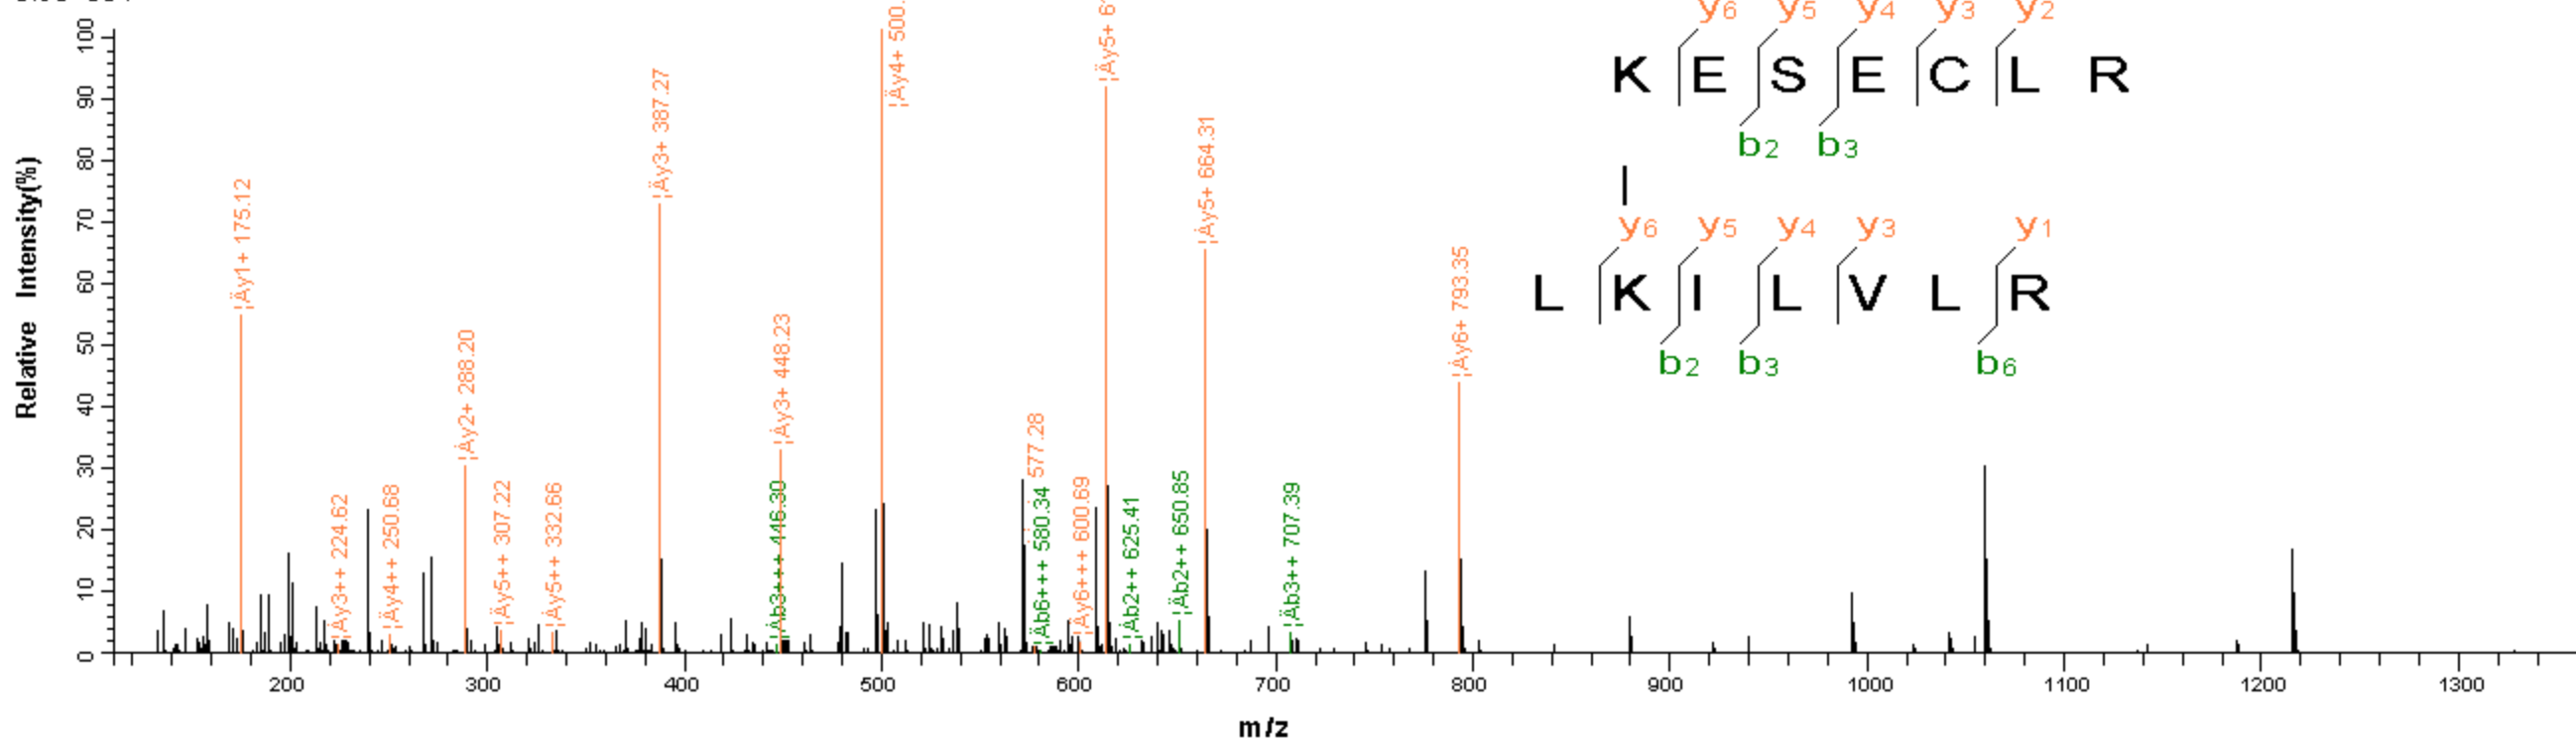

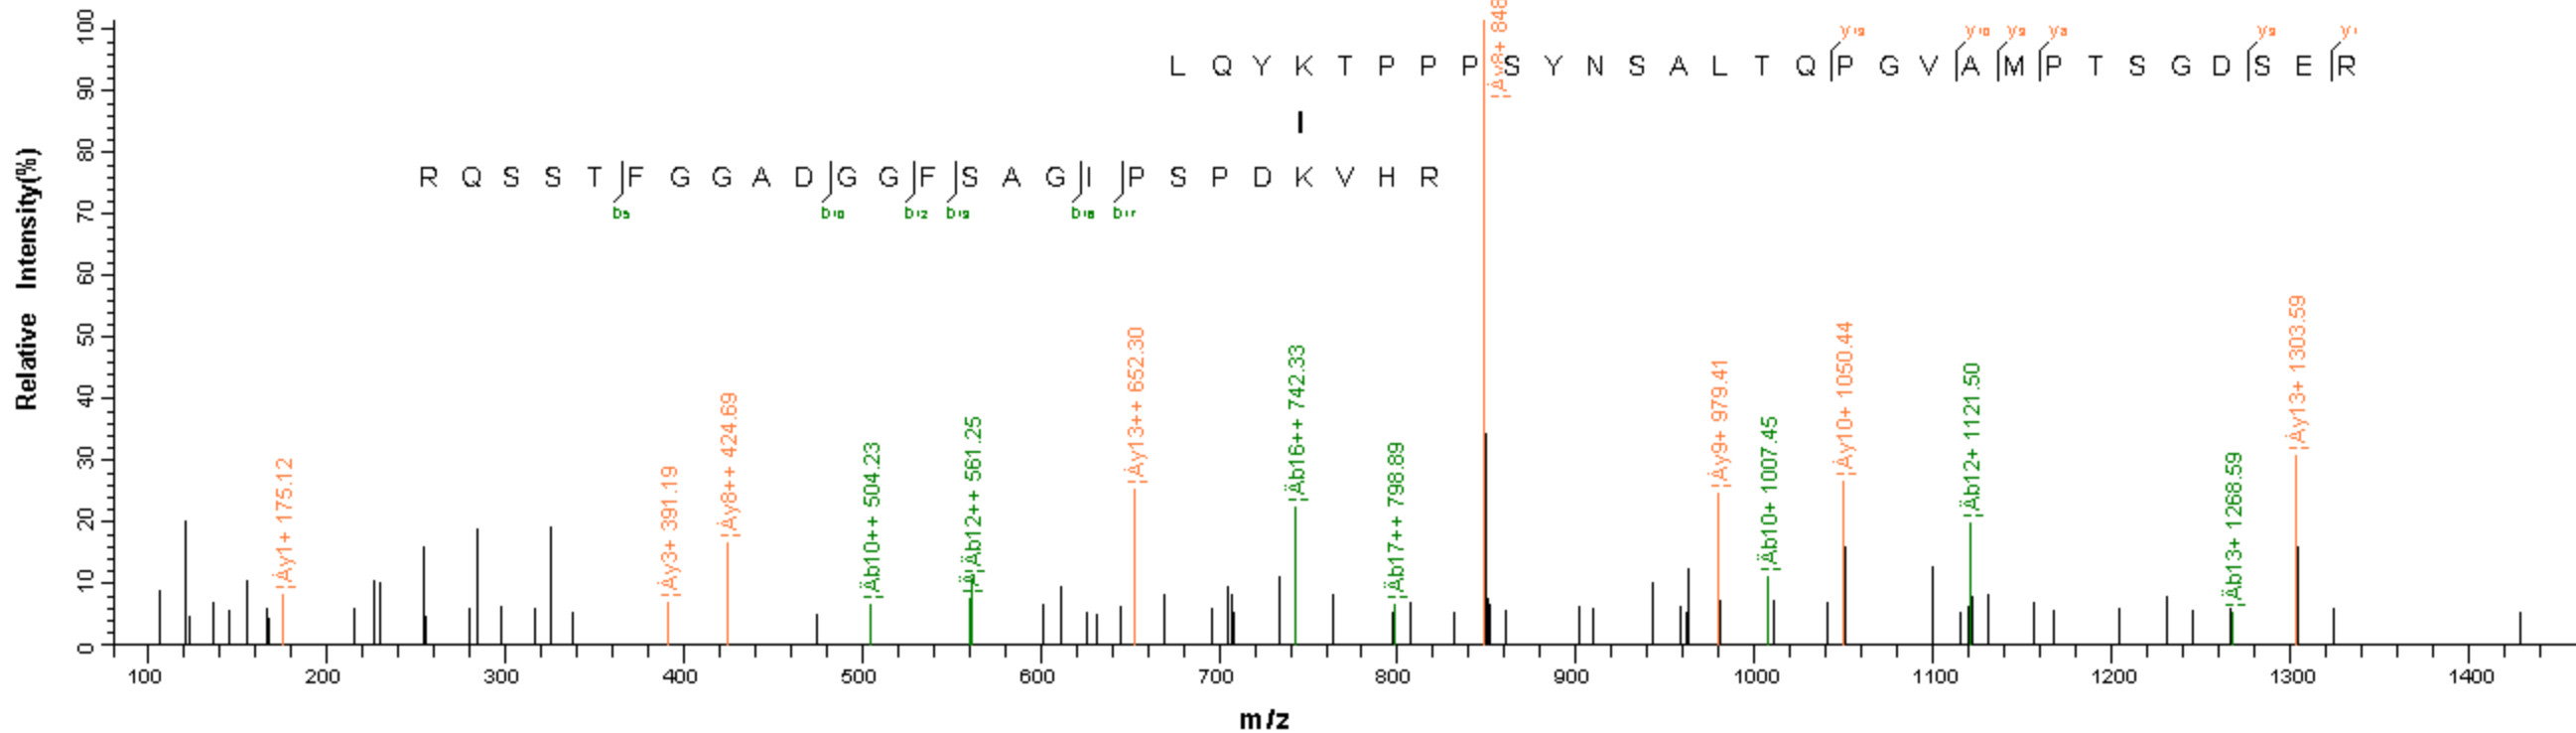

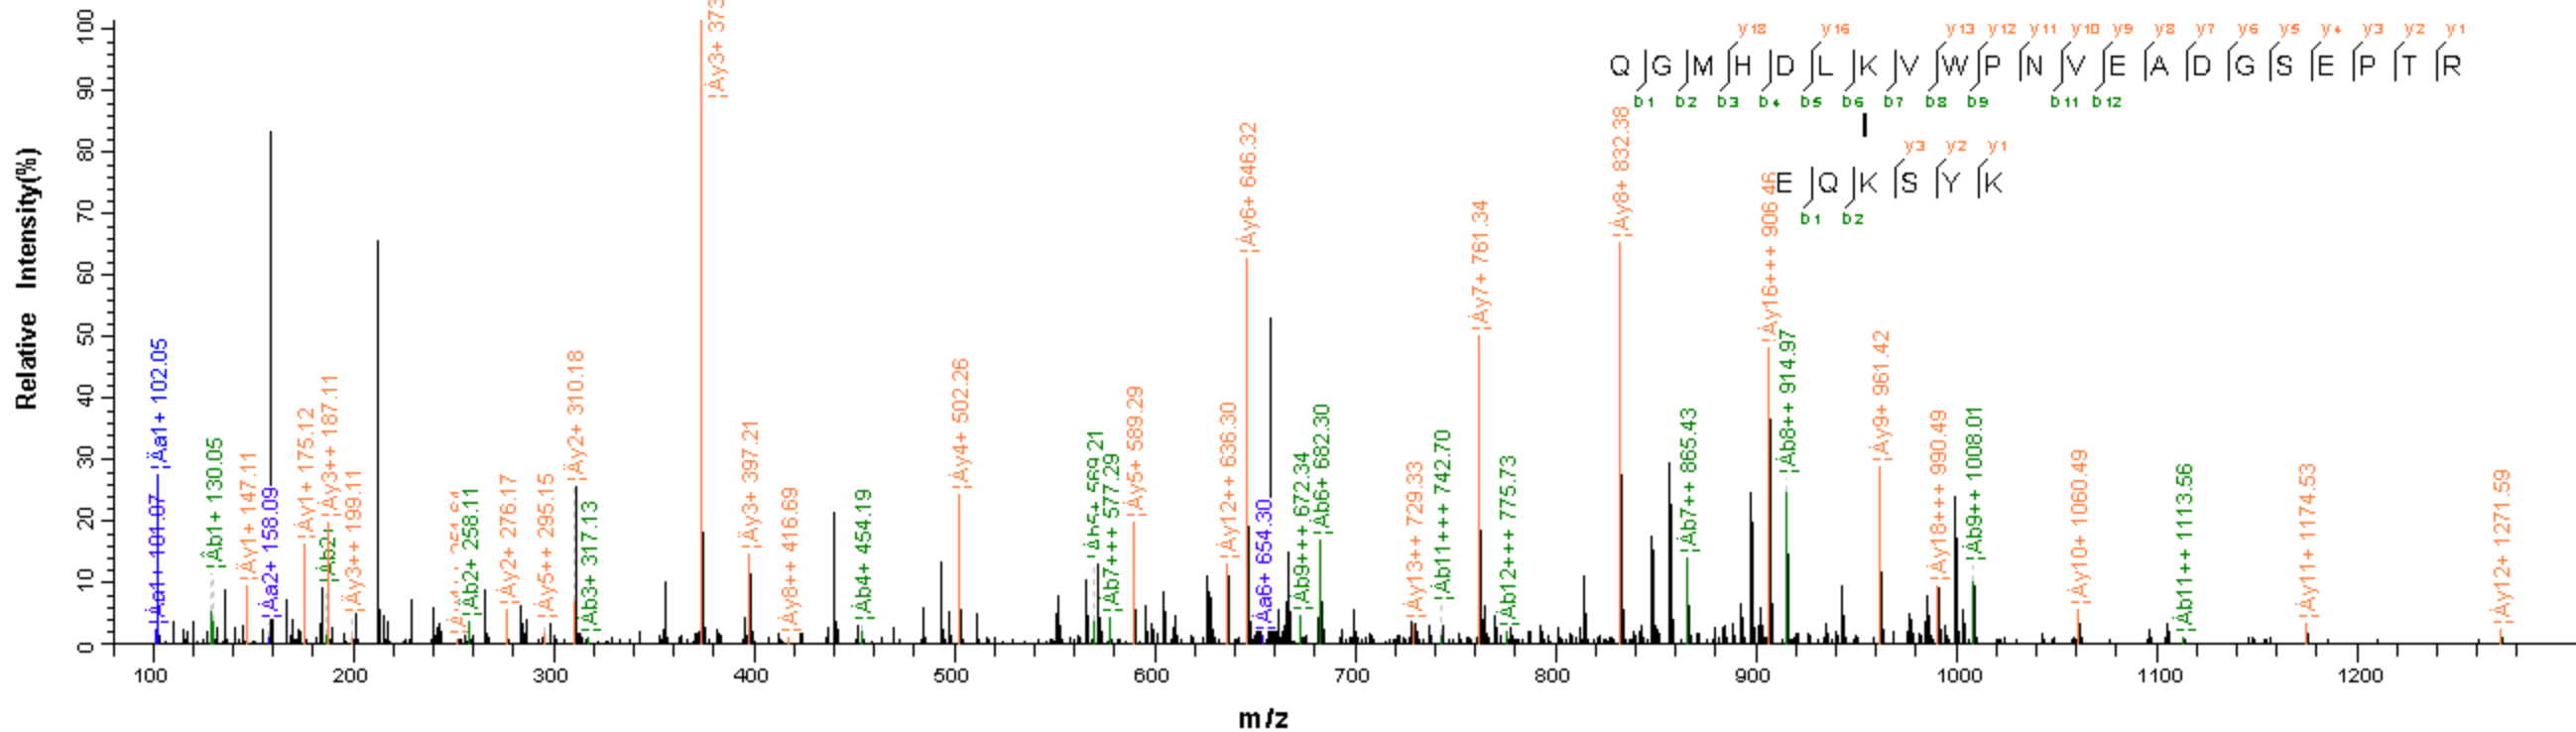



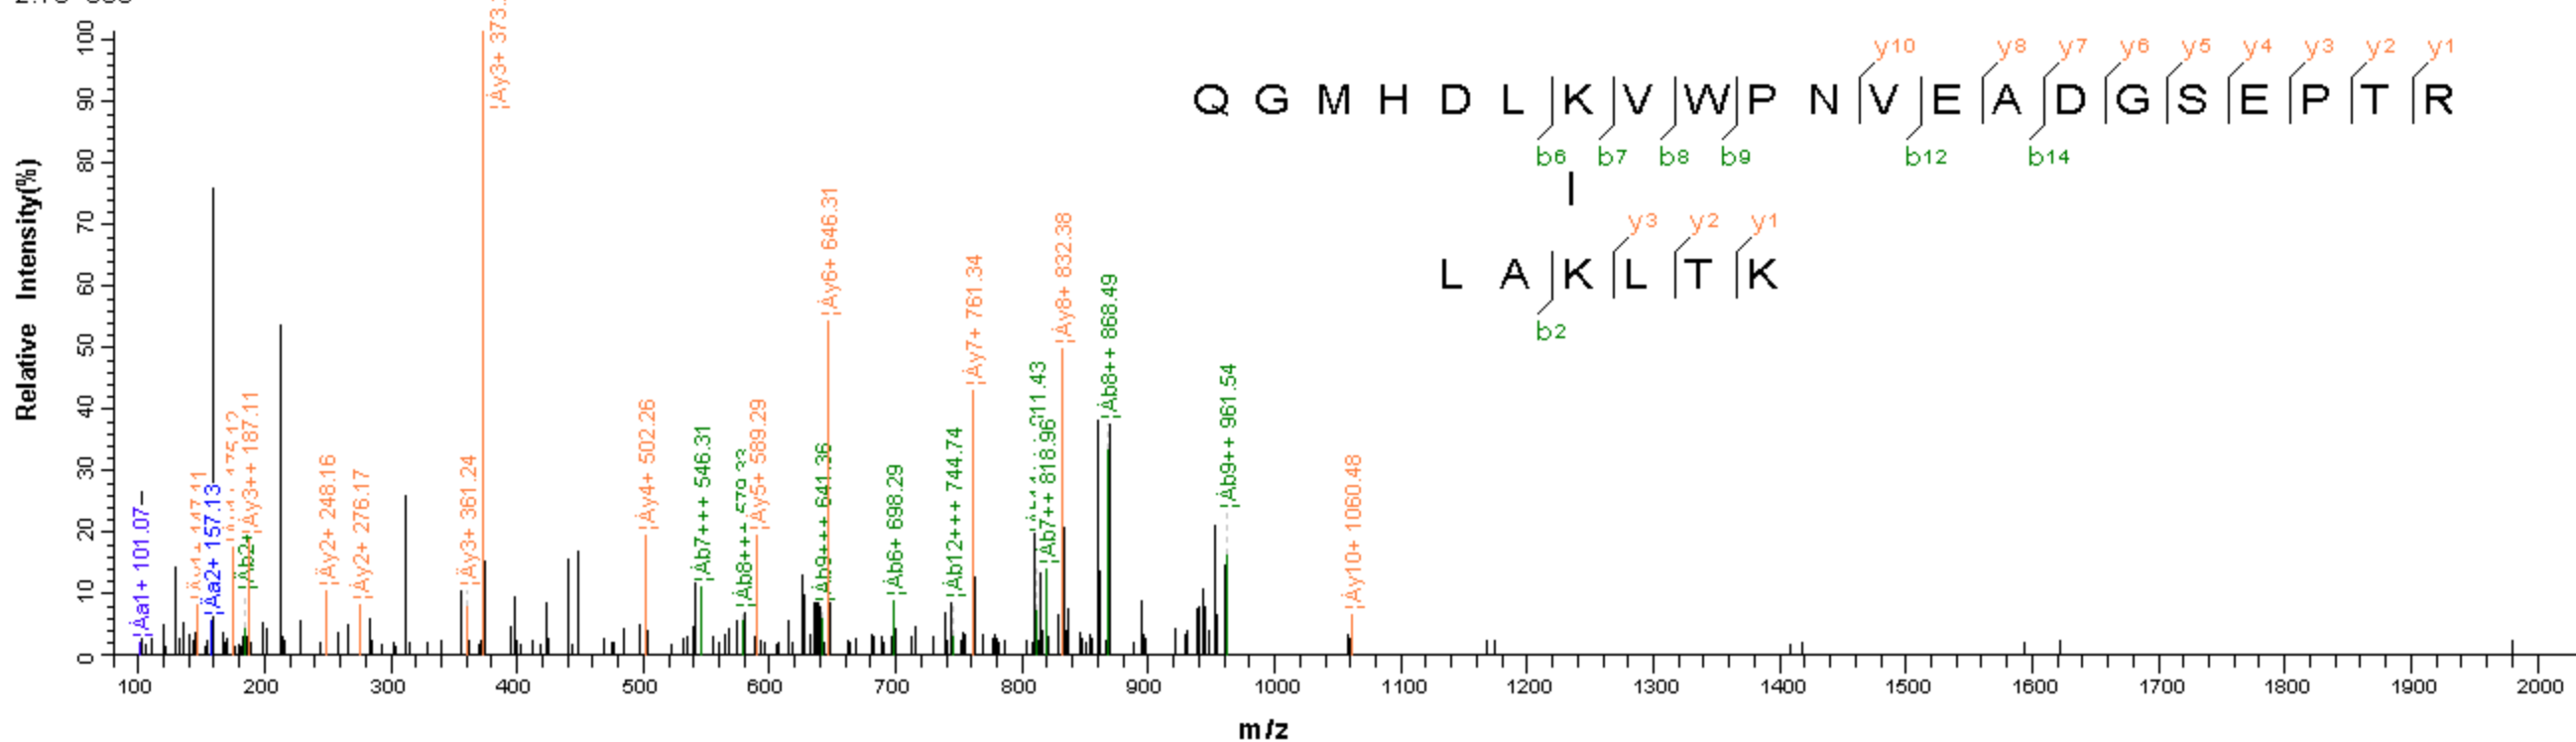



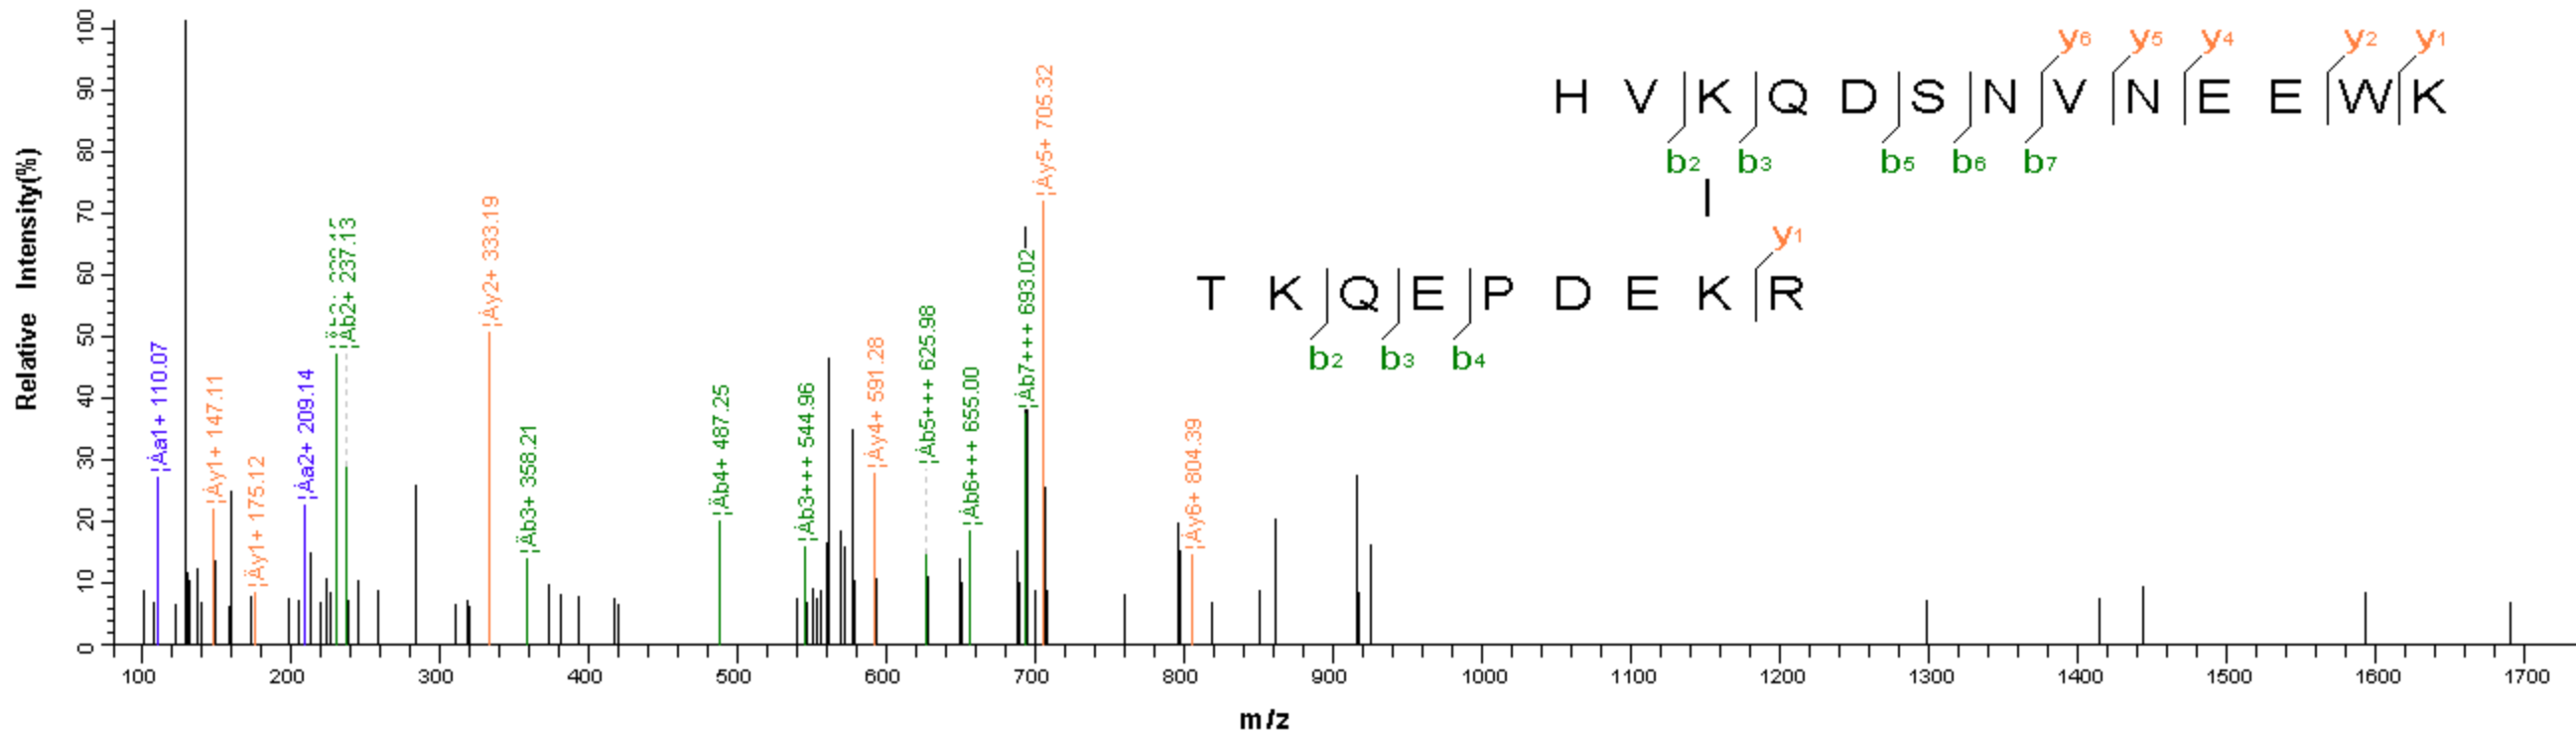

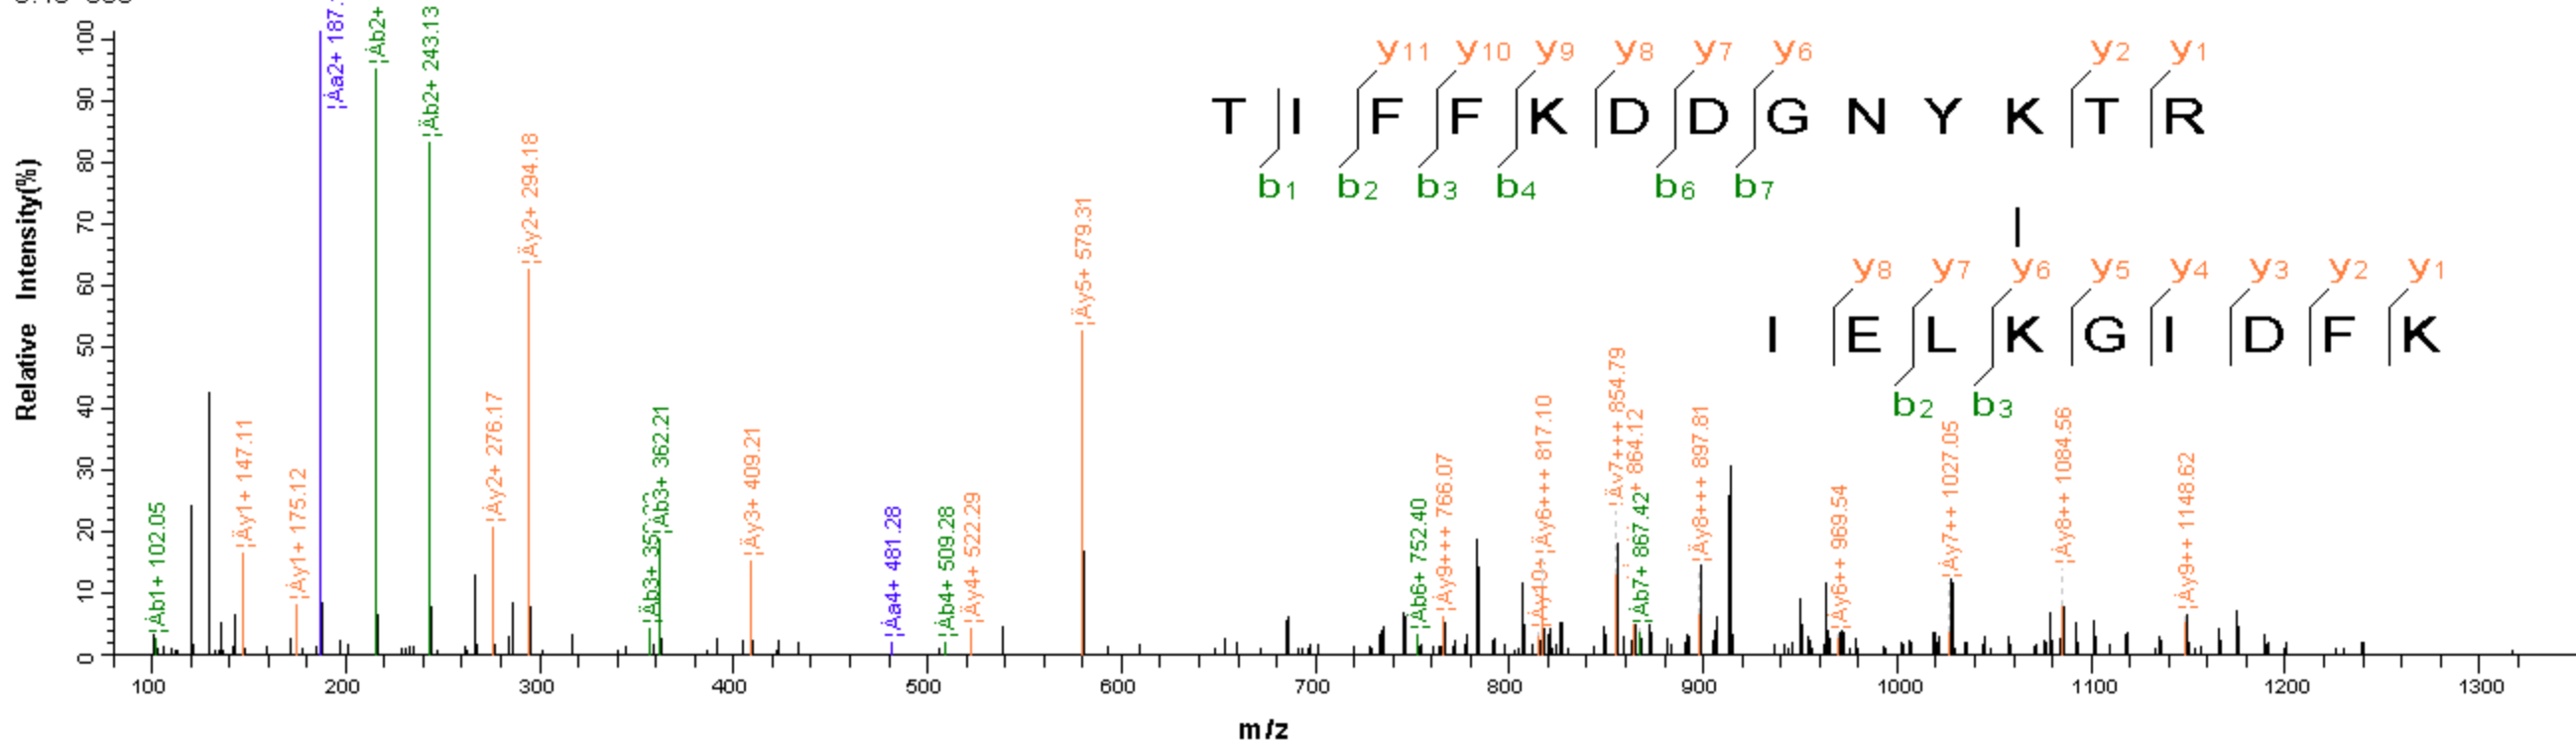

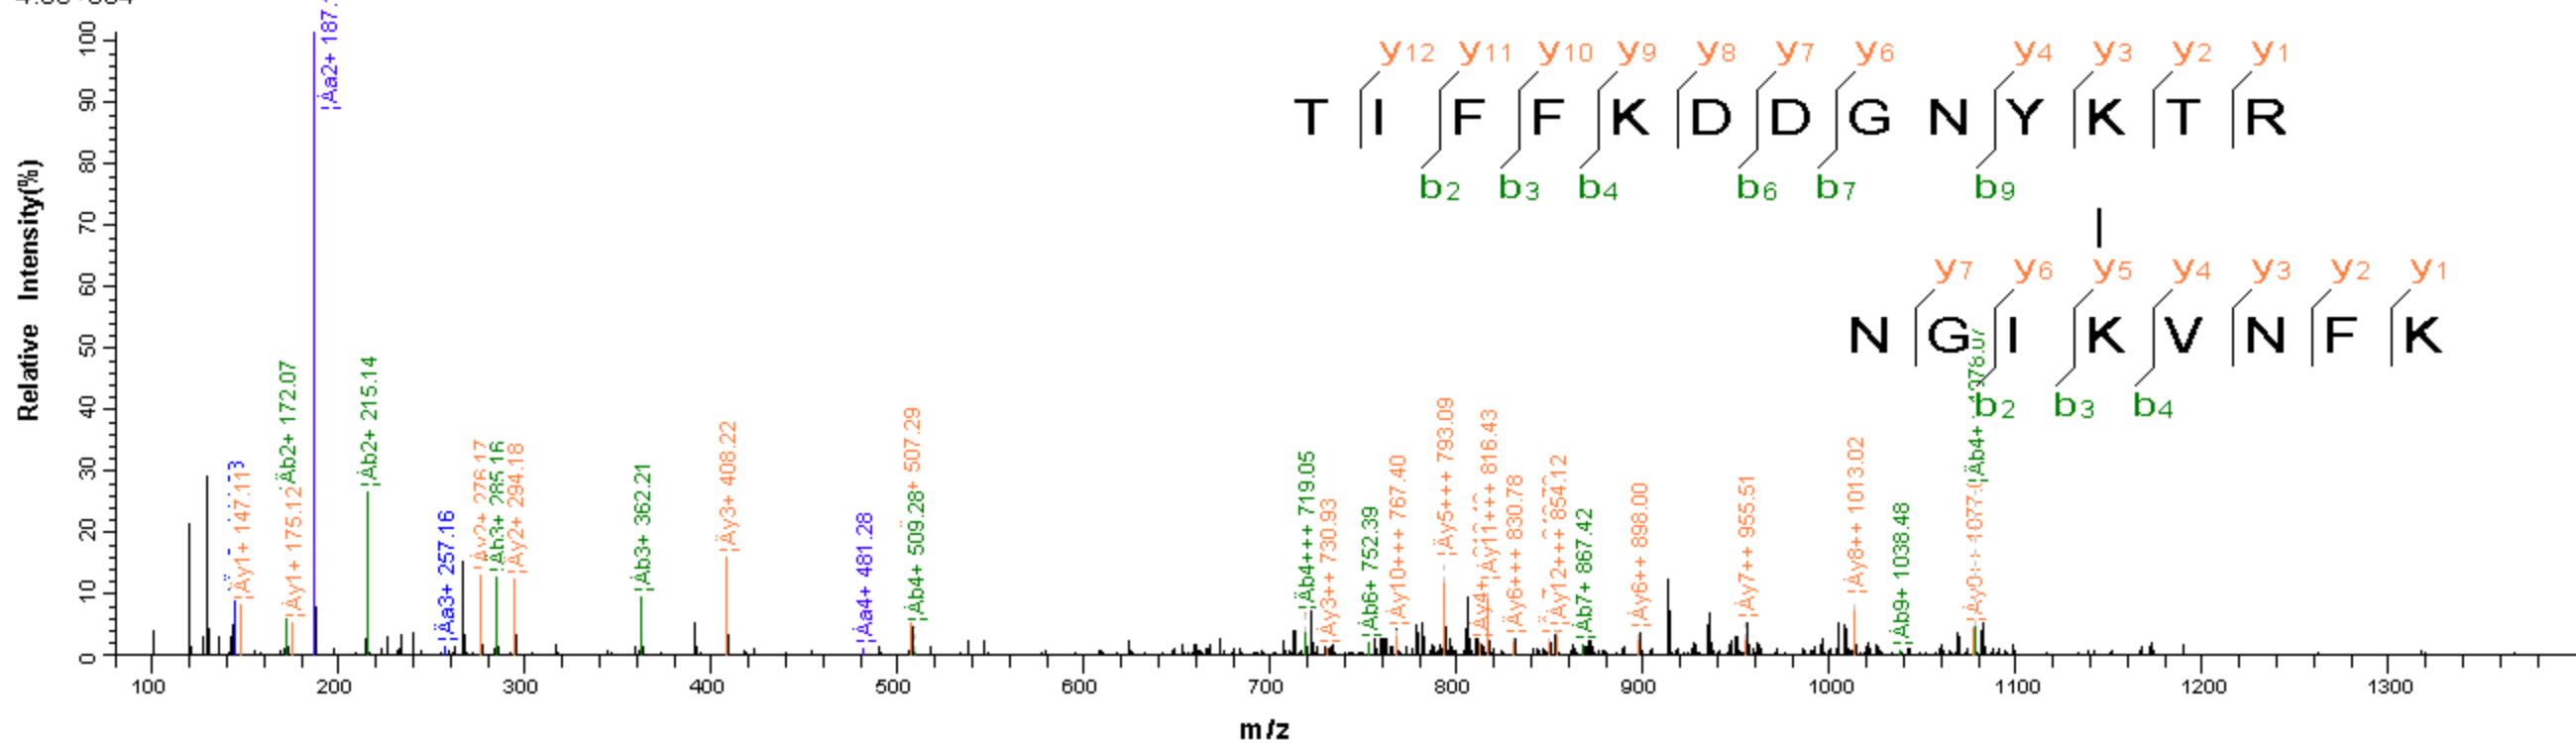

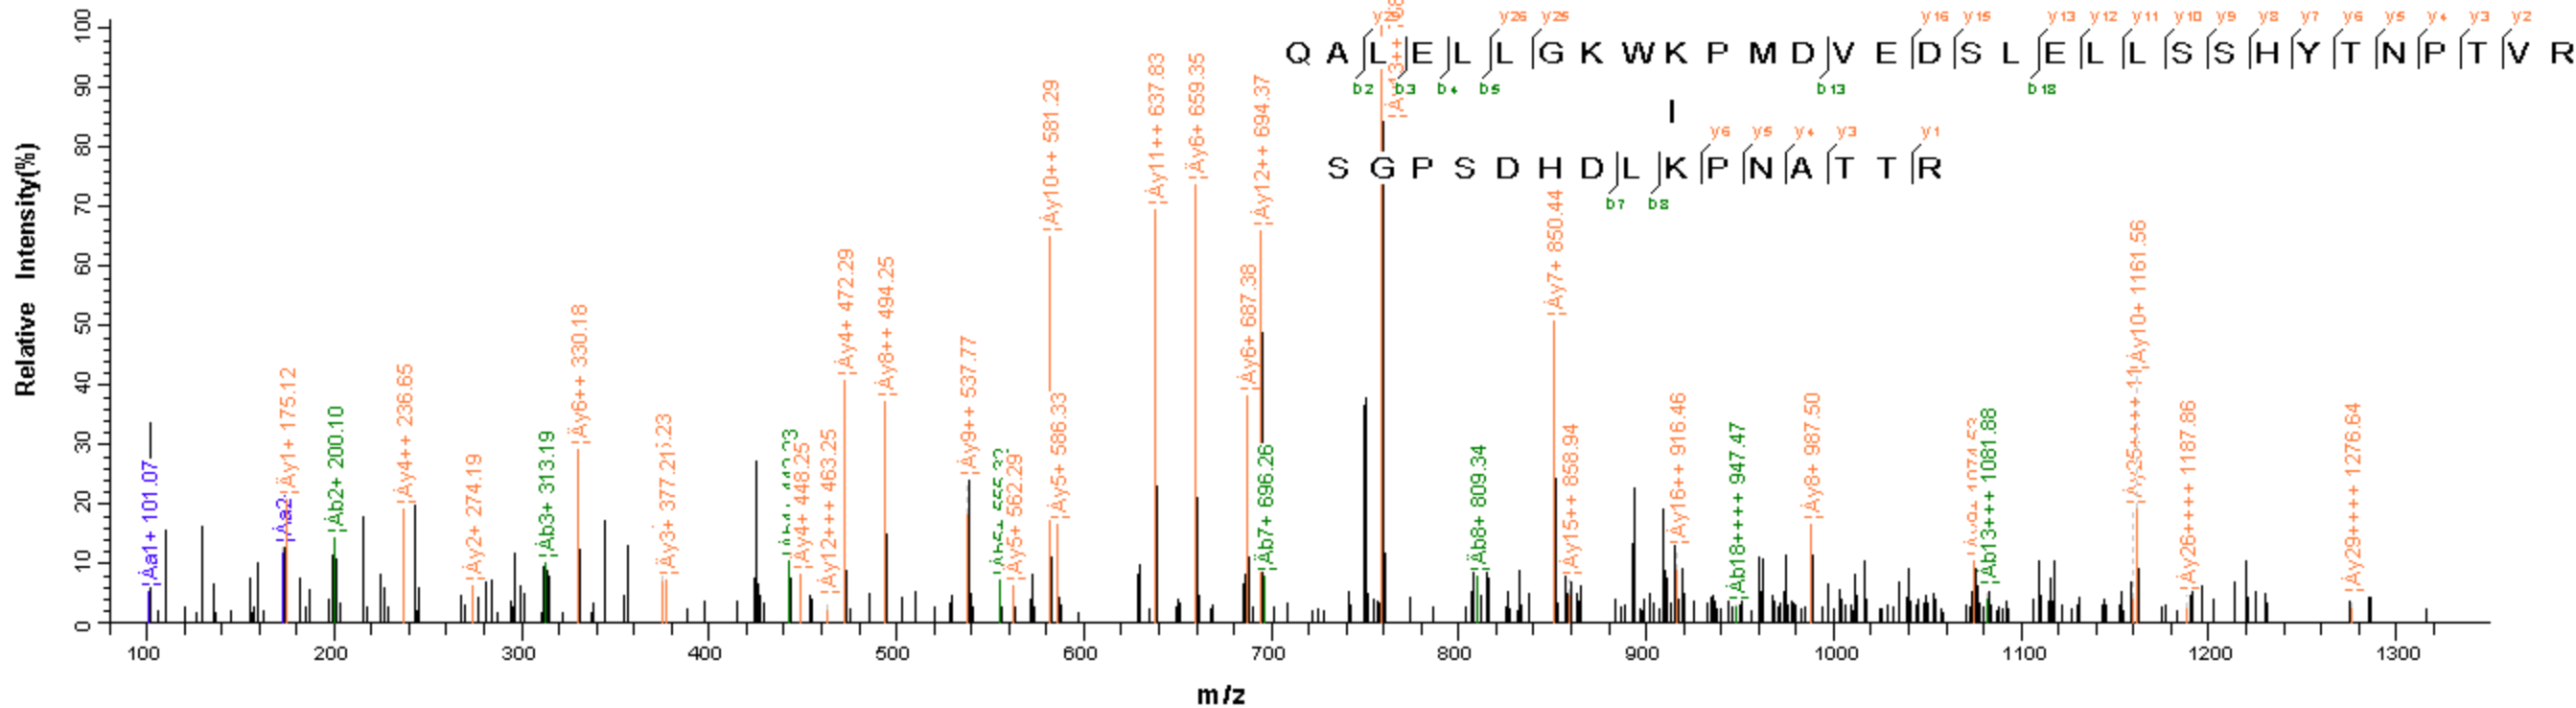

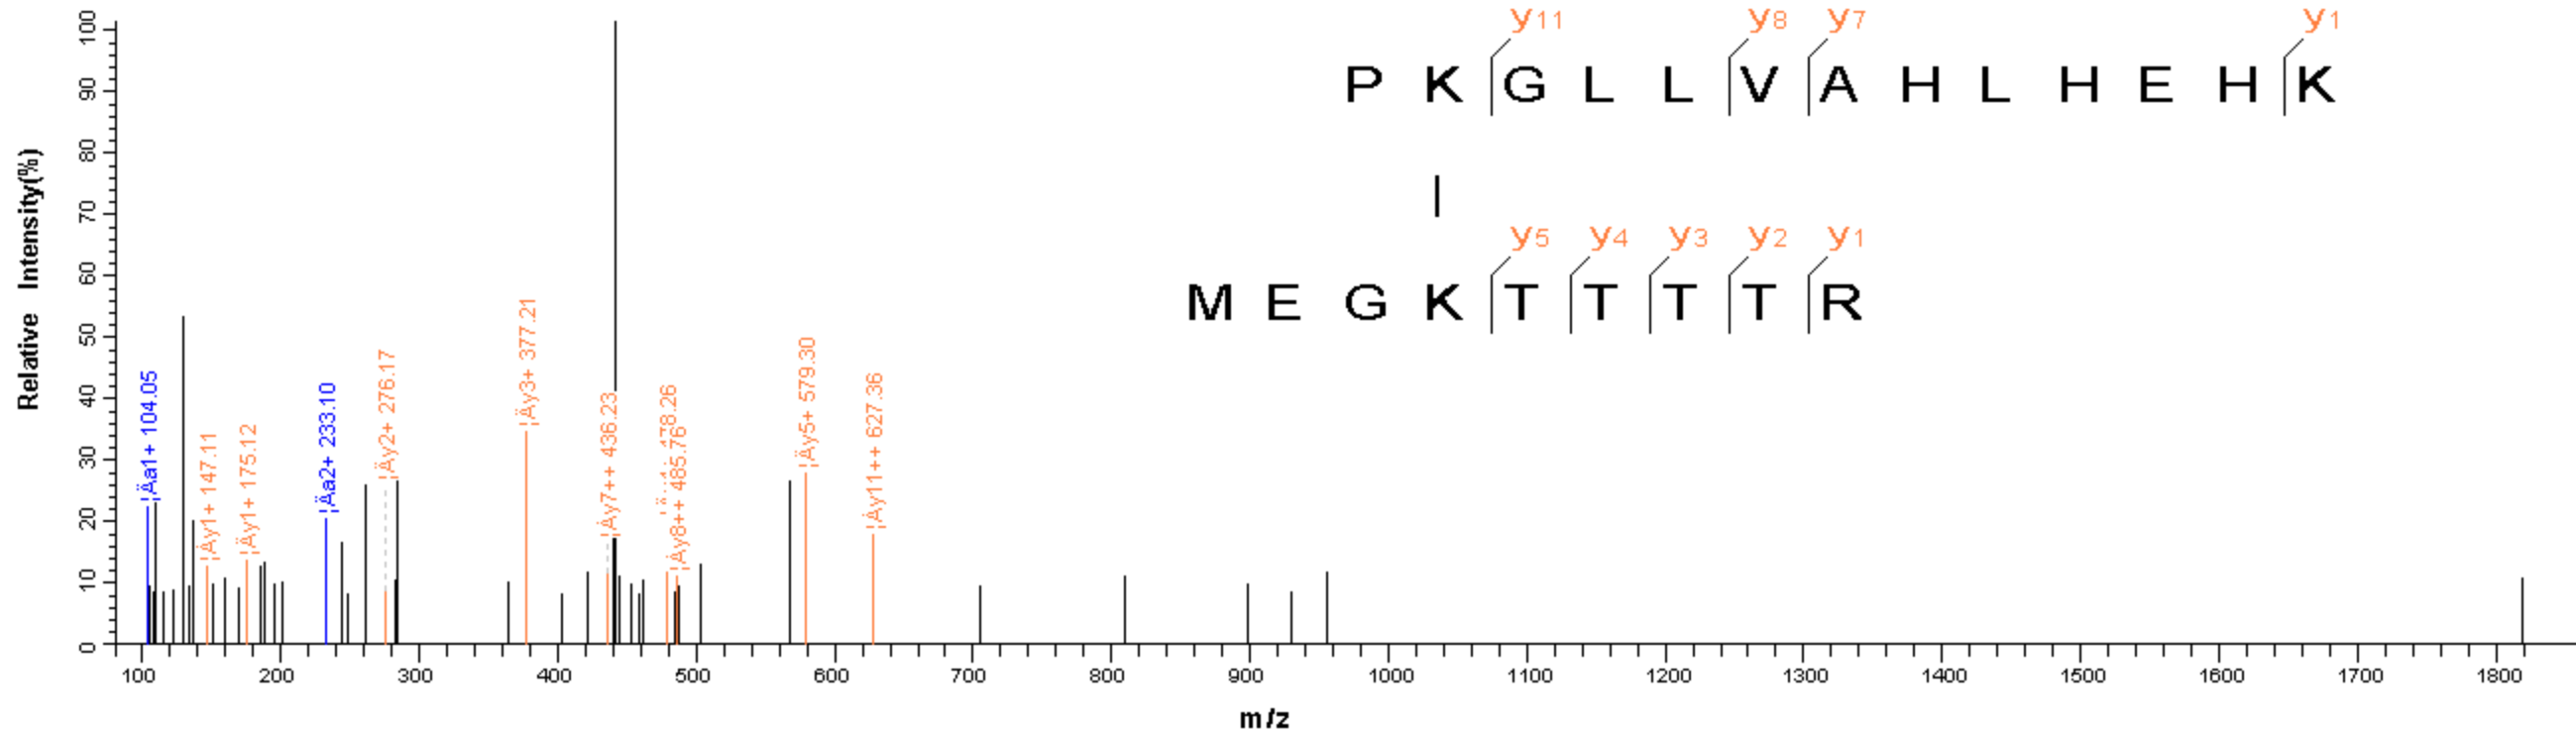

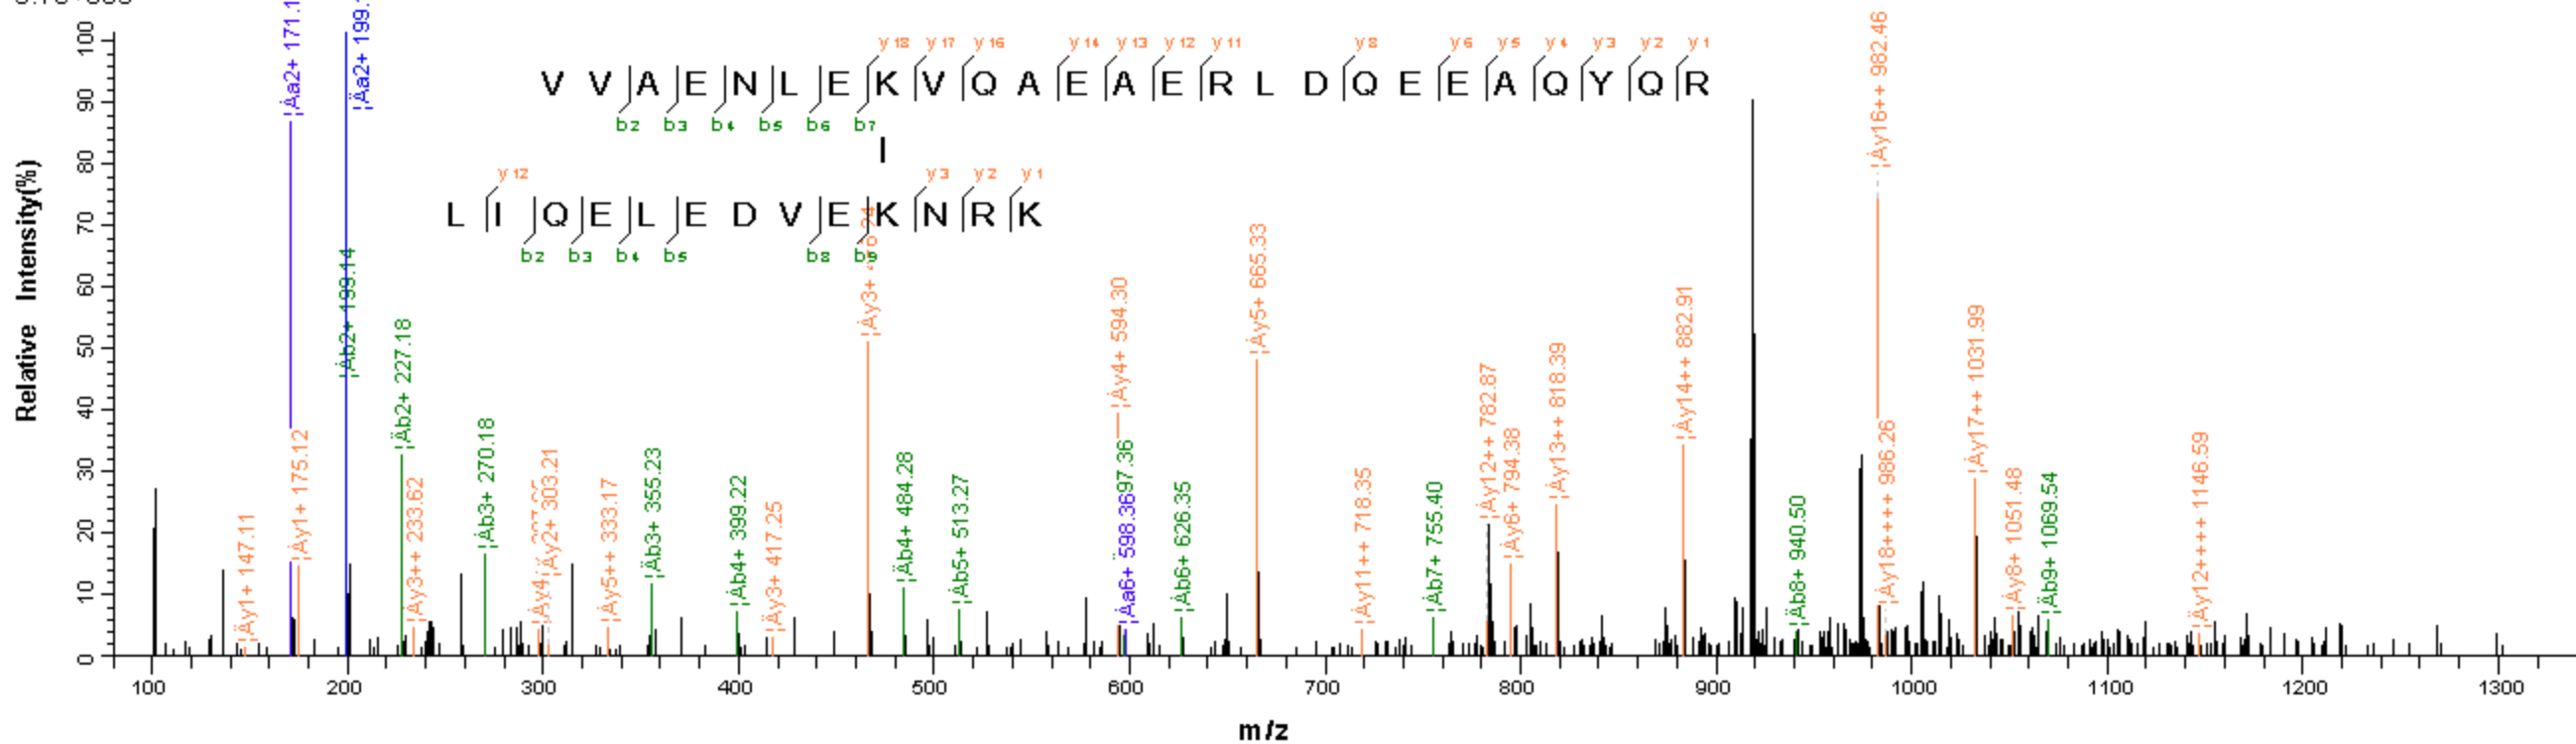



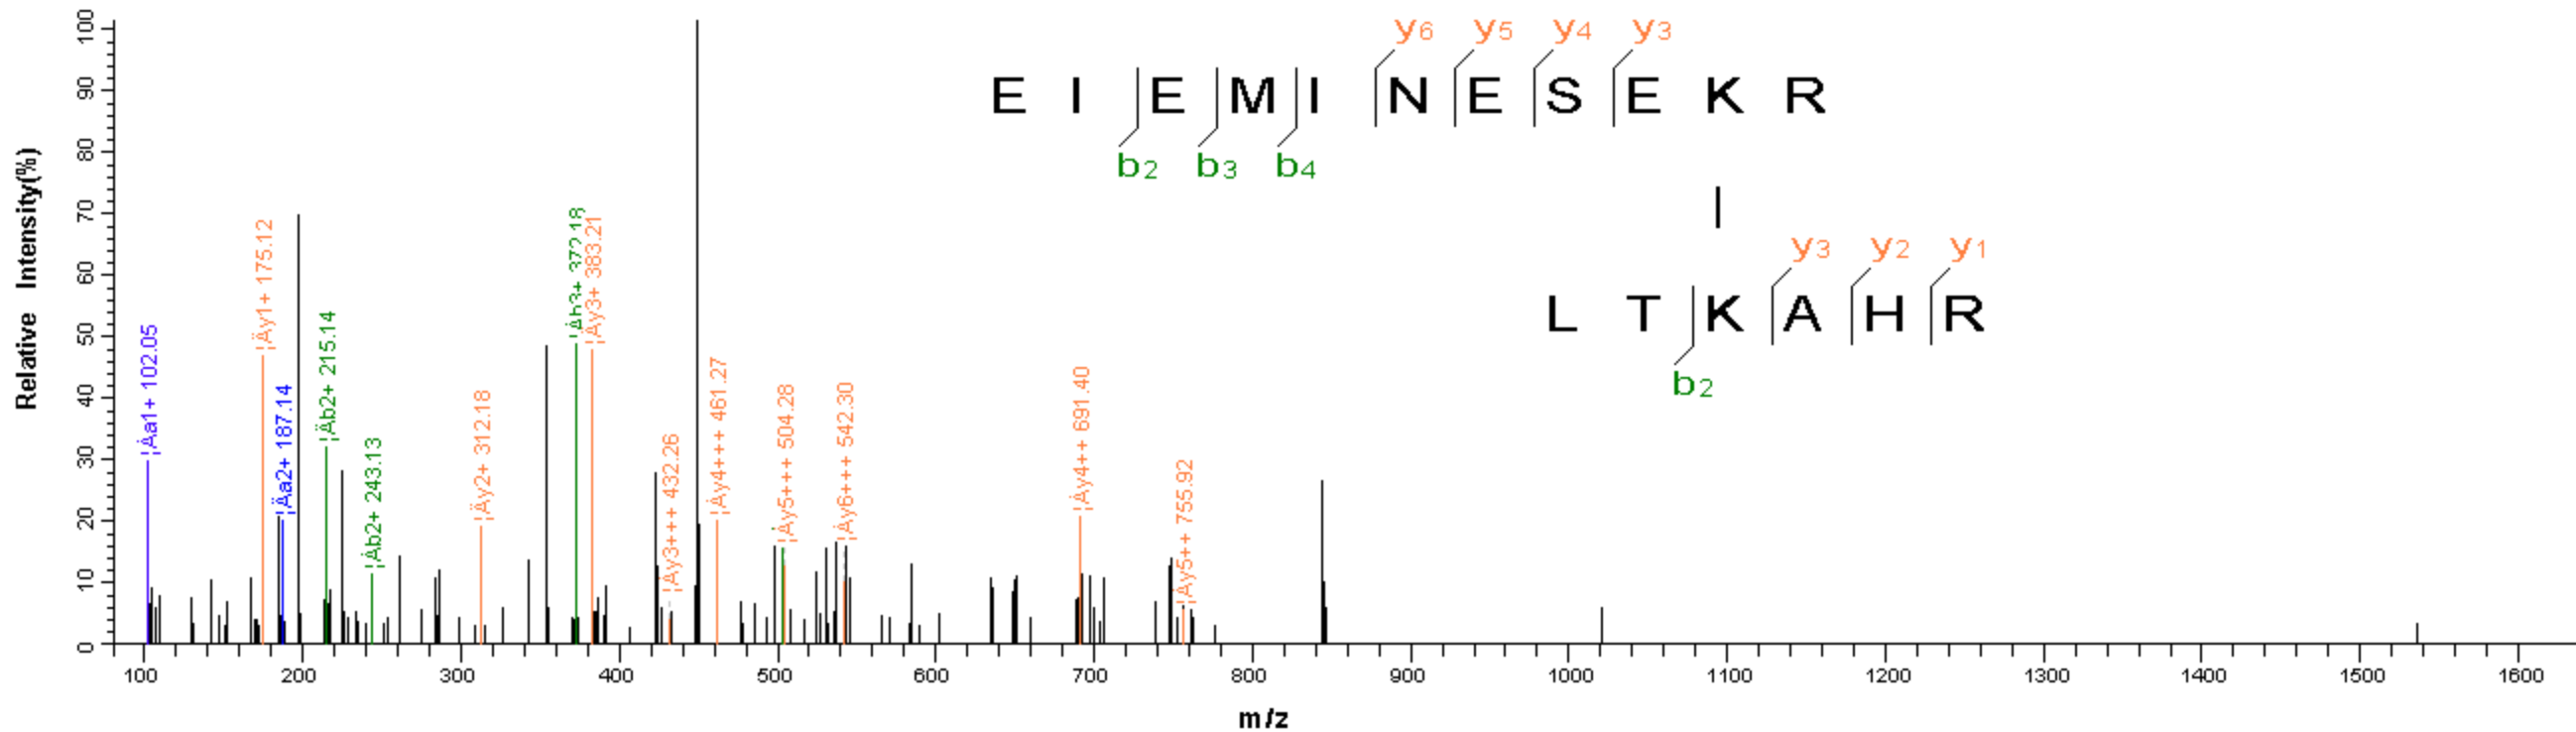

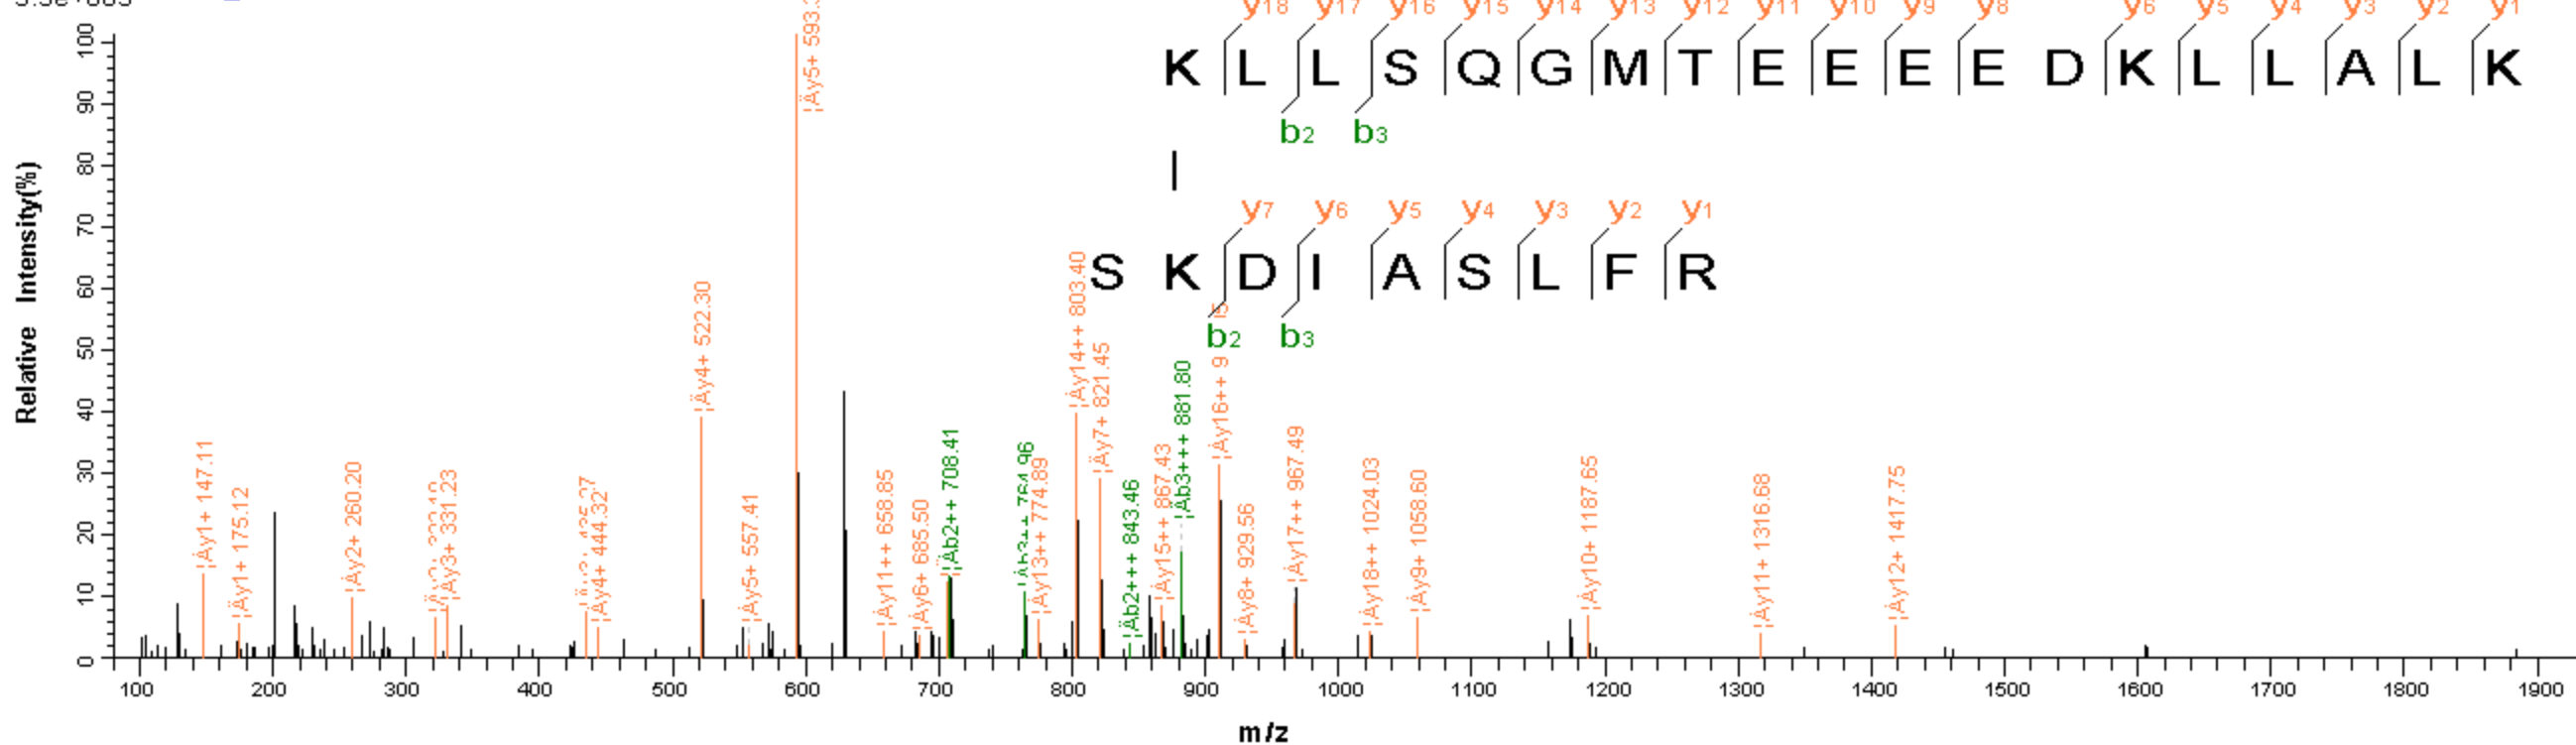

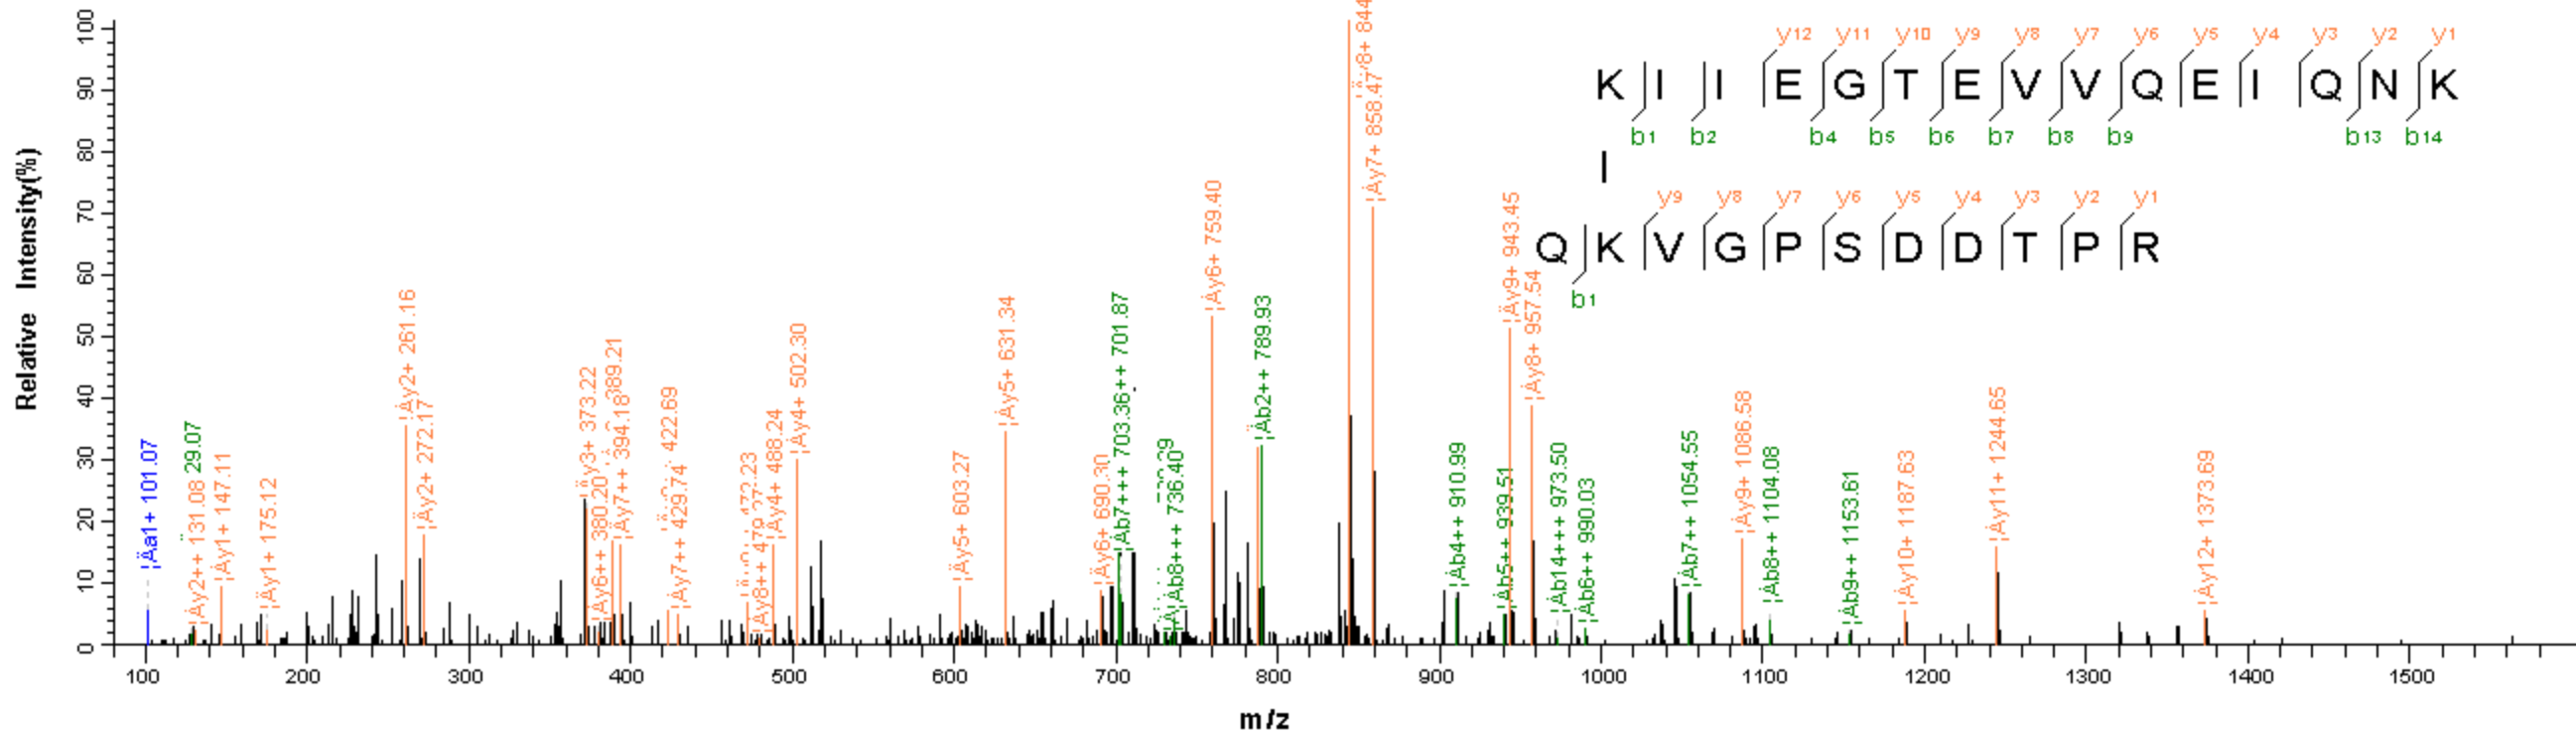

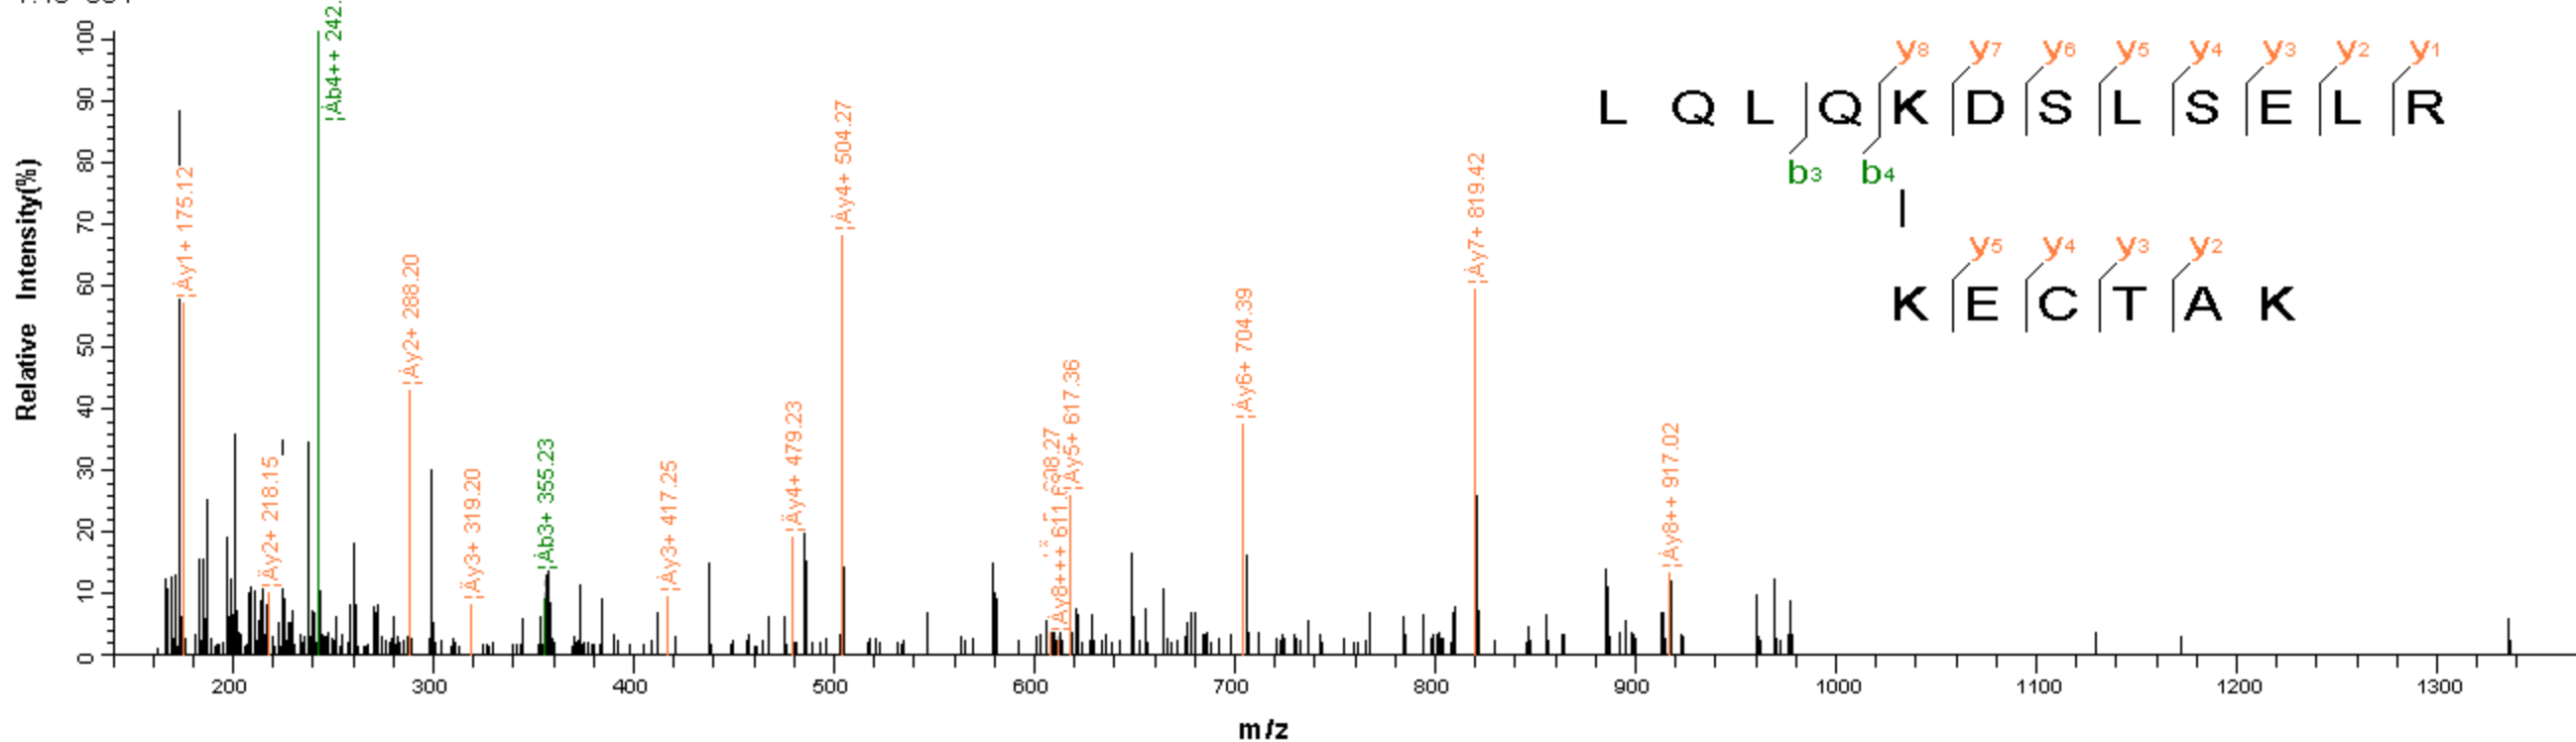

Supplement: NIHMS744241-supplement-Supplementary_Info.pdf [file NIHMS744241-supplement-Supplementary_Info.pdf]
